# Supplementary material for: Multi-Omics Reveals the Effect of Population Density on the Phenotype, Transcriptome and Metabolome of Mythimna separata
Source: MDPI journal article supplement (doi:10.3390/insects14010068), 2023-01-10
Supplement: s1 [file s1]

**Table S1** Primers for qPCR

|                                |                       |
|--------------------------------|-----------------------|
| <i>TRINITY_DN11213_c0_g4-F</i> | CGCTCTGACAAACCCCGT    |
| <i>TRINITY_DN11213_c0_g4-R</i> | CCAGCCAATCAACCTCCA    |
| <i>TRINITY_DN1026_c5_g1-F</i>  | ACATTTGTTGCGTCTGGC    |
| <i>TRINITY_DN1026_c5_g1-R</i>  | CACGGTTTTGACTTGCCT    |
| <i>TRINITY_DN11743_c0_g1-F</i> | GTCACCTGTGCGTTTTTCGT  |
| <i>TRINITY_DN11743_c0_g1-R</i> | GTGTTGCTTTTCTCCCTTTT  |
| <i>TRINITY_DN876_c3_g1-F</i>   | TCTTTCTCACTTCTTGCTTGG |
| <i>TRINITY_DN876_c3_g1-R</i>   | ATGTTTCGTTACGGGTTGGTT |
| <i>TRINITY_DN1017_c0_g1-F</i>  | CTTTGCTGGCGTAACTGGT   |
| <i>TRINITY_DN1017_c0_g1-R</i>  | AGGGAGGTTGTCGTGGGGA   |
| <i>TRINITY_DN2583_c0_g1-F</i>  | CAGATGTTGGCAATGGGCTT  |
| <i>TRINITY_DN2583_c0_g1-R</i>  | CTTCTTGGGGTTGACGGGG   |
| <i>TRINITY_DN1037_c0_g2-F</i>  | GGGTAGATAGCCCATACGCAT |
| <i>TRINITY_DN1037_c0_g2-R</i>  | GGAGAGGGAGACCATCACTGT |
| <i>β- Actin-F</i>              | CCAACGGCATCCACGAGACCA |
| <i>β- Actin-R</i>              | TCGGCGATACCAGGGTACAT  |
