# Supplementary material for: Multi-Omics Reveals the Effect of Population Density on the Phenotype, Transcriptome and Metabolome of Mythimna separata
Source: MDPI journal article supplement (doi:10.3390/insects14010068), 2023-01-10
Supplement: s1 [file s1]

|            |                                                                                                                                                                                                                                                                                                                                                                                                                                                                                                                                                                                                                                                                                                                                                                                                                                                                                                                                                                                                                                                                                                                                                                                                                                                                                                                                                                                                                                                                                                                                                                                                                                                                                                                                                                                                                                                                                                                                                                                                                                                                                                                                                                                                                                                                                                                                                                                                                                                                                                                                                                                                        |
|------------|--------------------------------------------------------------------------------------------------------------------------------------------------------------------------------------------------------------------------------------------------------------------------------------------------------------------------------------------------------------------------------------------------------------------------------------------------------------------------------------------------------------------------------------------------------------------------------------------------------------------------------------------------------------------------------------------------------------------------------------------------------------------------------------------------------------------------------------------------------------------------------------------------------------------------------------------------------------------------------------------------------------------------------------------------------------------------------------------------------------------------------------------------------------------------------------------------------------------------------------------------------------------------------------------------------------------------------------------------------------------------------------------------------------------------------------------------------------------------------------------------------------------------------------------------------------------------------------------------------------------------------------------------------------------------------------------------------------------------------------------------------------------------------------------------------------------------------------------------------------------------------------------------------------------------------------------------------------------------------------------------------------------------------------------------------------------------------------------------------------------------------------------------------------------------------------------------------------------------------------------------------------------------------------------------------------------------------------------------------------------------------------------------------------------------------------------------------------------------------------------------------------------------------------------------------------------------------------------------------|
| InR1       | >TRINITY_DN1670_c0_g1                                                                                                                                                                                                                                                                                                                                                                                                                                                                                                                                                                                                                                                                                                                                                                                                                                                                                                                                                                                                                                                                                                                                                                                                                                                                                                                                                                                                                                                                                                                                                                                                                                                                                                                                                                                                                                                                                                                                                                                                                                                                                                                                                                                                                                                                                                                                                                                                                                                                                                                                                                                  |
| TRINITY_D  | CGGCAGGCCCCGCGCTCTCCGCTTCCCTCCCTCAGTCGTTGCGCGCGCTCGTTTGTGAT                                                                                                                                                                                                                                                                                                                                                                                                                                                                                                                                                                                                                                                                                                                                                                                                                                                                                                                                                                                                                                                                                                                                                                                                                                                                                                                                                                                                                                                                                                                                                                                                                                                                                                                                                                                                                                                                                                                                                                                                                                                                                                                                                                                                                                                                                                                                                                                                                                                                                                                                            |
| N1670_c0_g | AACTCGTCTGCACGTTATCCGCTGTTTGCCGCGTATTATGTTTACAATAGTGATGTTATT                                                                                                                                                                                                                                                                                                                                                                                                                                                                                                                                                                                                                                                                                                                                                                                                                                                                                                                                                                                                                                                                                                                                                                                                                                                                                                                                                                                                                                                                                                                                                                                                                                                                                                                                                                                                                                                                                                                                                                                                                                                                                                                                                                                                                                                                                                                                                                                                                                                                                                                                           |
| 1          | GTTGTGGTTATTATAAAAATACACAATTCAAGTGTTTAGTGCTGTGTGACAAATTGAAA<br>TATTGTAAGGATCTGTTGAATATAAATAAACTGTGGATCGCAAGGAGCAGACAA<br>GCACGGCAGGCACCGAGCTCAGCTCGGGTCATGTGGTCAGCGGGCCAGGGGCGCGG<br>CACGGCGTGATGCGGCGCGCGCAACAGCCTCGCATGGCCGGTGCTGGCGTGCGCG<br>CTGCTCTCAGTATGCGCGTGCGCCGATGCCATCGGCGAGAATGGAATATGCCCTTCAA<br>TGGACATAAGGGGCGATTATCCGCCCTGAAGAATCTGAAGAACTGTCGAGTCATCGA<br>AGGCCAGCTCAGCATCGTGCTGATGGAGATGGCCACGCCCAAGGACTACGAGAACAT<br>GTCCTTCCCGCTTCTAAGAGAGGTCACCGATTATGTTCTGATGTACAGGACGAAAGGT<br>TTGCAGAATCTCGGCAATCTGTTCCCCAACCTCTCCGTGATACGCGGGATGCAGCTCTT<br>CAAGGATTTGCGGCTCGTTATATTGATAATGAGCATTTGGAATCCCTGGGTCTTCGTT<br>TTTGATGAAGATCGAGCGGGGTGGTGTGCGGATACAACAGAACGACAGGCTCTGCTA<br>CACAGACACCATCGACTGGACCCGGATCACCACGGACCATGCCGACAATGTTATAAG<br>GATGAACACGACACGCGACTGTGTGGGCTGTGCCCCGAATGCGCAGAGTCGTGTCCA<br>GGACCATCGGCTGTGCGCACTTGAGTGCCCGTCCGATGCGAACGACCGCTTGCTCTGT<br>TGGGACGACAAGCACTGCCAGAACTGTGTTGACGCAATGCGGCGACACGGCTG<br>CCTGGACAACGGCACTTGCTGCCACCCGAGCTGCCTGGGCGGTGTTCCGGGGCCAC<br>CTCCCGGGACTGCCACGCCTGCCGCAACTTCTCCTTCGGAAACGGCAGCGAGCGCAT<br>ATGCCTGGACTCCTGCCCTGCTAATGGCACTTTTCAGTTGTTCCATCGCTGTGTGACGG<br>AGCAGGAGTGCCGCGACACCCCGCCGCCCTCACCGCCGACCCGAGGCCCCGGAGG<br>TACAAGATCTCCGGCAACCGCTGCGTCTACGACTGTGACATCGGCTACATGGAGGTCG<br>GCGATCCTAAAAACGCGACATGTGTGAAATGTTCCCGTCGGGCTGCAGAAAGGACT<br>GTCTGGGAGACAAGATCGACTCGGTGGCGGCGGCCGAGAAGTACCGCGGCTGCACG<br>CACGTTACTGGCAACCTCGAGATCAGCTTGCGCGCCTCTGGAGGTAACACGTTGGCAC<br>TGTTAGAAGAGTCTTTGGGTGAAATCCGCGAGATTACTGGCTCGTTGTCGGTCATACG<br>AGCTTATCCACTGGTGTCACTGATGTTTCTGAAAAACCTGAAGAAAATCACAGCATTG<br>CCCCATTCTGAATCGGACATGAAGAAAAATAGAGGTCAAGTATTACATATTCAACA<br>ATCCGAACCTGGAGTTGTTGTGGGACTGGACGACTCACGGCGACATCGACATCTCCG<br>GCGGCTCGCTGTACATACACCTGAACCCCAAGCTGTGCTACTACACGCGAGCTGCTGCC<br>GCTCAAGAACATGACGAGGAACCCCCGCTCCAACCTTCACTGACTTGGAAGTTTCCGA<br>AGACAACAACGGGAATCAGGCCTCTTGTCTACCGGACAAGTTGCACTTGCAAGTGAG<br>TCAGTACCACCCCATGACGGTGGTGTGCTGAGTGAAGCGCTATTGCCCCGAGGACATC<br>CGCAAGCTGCTCGGCTACTCCGTGTACTACATCGCCACCAAGCCCAACCAGAACGTC<br>ACGCTCTACGAGCAGAGGGATGTCTGCTCCGATATATGGAGTGTTCAAGGATATATCAG<br>CGGATGAAGTACATAATGAATCAAGTACACTTTTAACTACCAGCCAACACGACATTCT<br>TCAGAATCCATGCCTTAATACGCAACCGAGTTTCTACGTGTTGGCACATTTGAGTCCTT<br>ACACGCGCTATGCAGCGTATTTGAAGACTGTTACCACTTCACAGGAGAAAAAGGGTG<br>CACAAAGTTCCATCATATACTTCACAACATTACCTGGGAGACCGAGTGAACCTCAGAG<br>CTTGACGGTGGAGGCGCTGACGCCGCACTCGGTGTCCATCCGCTGGGCCGAGCCGCT<br>GCTGCCCAACGGCACCATCGTGCTGTACCACGTGGCCGTGCAGGCCAGCAGCTACAA<br>CCTGCCGCAGCTGCTGGCCGGCAACCCCACTACTGCGCCAACCCGAGTGCTTGGC<br>GAATATGATCACTGGTCGAACAGAGGAGTCAAGTACGAACACTAAGAAAAAAGAGA |

CGACCGGTGACGTCACCTAACGGGTCCTGCTCCTGTAAGGAAGAGGAGAAGCAGACC  
ACGAGGTTCAACTCCCGATCGGAGTGGGAGCGGGAGGAAACCATCACCTTTGAGAAT  
GACCTGCAGAATAGGGTGTACGTAAAGACGACTGAGAGACAGAAGCATTCAAAAAG  
CAGAGTAAAACGATCTCAGAACCACTACATGAACAGCATGCTTGTGAAAGTGGCCGA  
AAGCATCGAGCCCAAGTTTGGTCAAACTATACCAATACCACCGATGCGGAAGGATAT  
GTGGAGTCACTGTACTTCGAGCTAAGCGGCGACACGAAGTCCGTGACGGTGACGAAC  
ATGCGGCACTTCACGTGGTACACGGTCAACGTGTACGCGTGCCGCGCCAAGCACGAG  
AAGGAGCAGCCCGAGGTGTACGAAGCGACGTGGTGCTCCAAGCACAGCGCTTATAAC  
AGCTTCCGGA CTCTGGAATTAGTGAACGCGGATATAGTGCACAATTTGCAAGCAGAAG  
TGATCGTGTCGAACAAGACGACAGCCGAAGTGAACGTGACGTGGAAGCCGCCCAAG  
AACCCCAACGGGTTCTGTGGTCGCTACACCGTGCACTACTATCGCGTGGAAGACAGC  
TTGGCGGGGCAGGACGTGGGGCTGCAGAGCTGCATCACGGCGGACGACTACGCGCA  
GAACGGGTTCTGGCTACACGCTGCGCAACGTGGCGCCCGGCAACTACAGCGTCGAGGT  
CACGCCCATCACCGCCGCGCGCGGCAACGCCTCCGCGCTCTACCCGCCCATCTTC  
ATACCGGAGAGAAAATCGGCCGCAGCTTACGACTGGATCTGGGGCGTGGTGGGCGGC  
TGCGTGATCATGCTGCTGGTGCTGGGCGGCGGCATCTGGTACGCGCGCCGCGGCCTGC  
TGCCGTCCGCCGAGGCCAACAAGCTGTTCGCCAGCGTCAACCCCGAGTACGTGTCCA  
CCATGTACGTGCCCAGCAGTGGGAGGTGCCGCGCACCGCCGTGAGTTCGTCCGCG  
AACTGGGCCAGGGCTCCTTCGGCATGGTGTACGAAGGTCTTGGGAAAGGTATAGAAA  
AAGGGAAACCCGAAACTCGGTGCGCTGTCAAACTGTCAACGAGCACGCTACTGATC  
GGGAGCGTCAAGAGTTCCTGAACGAAGCGTCGGTGATGAAGGCGTTCGACACGTTCC  
ACGTGGTGCGGCTGCTGGGCGTGCTGTCGCGCGGACAGCCACGCTCGTCATCATGG  
AGCTCATGGAGTTCGGCGACCTCAAGACCTACCTGCGCTCGCACCGCCCCGACGCCG  
AGGCCTCGCTGCCGCGCAAGGGCGGCGACGAGCCGCCACGCTGCAGAACATACTG  
CAGATGGCTATTGAAATAGCCGACGGTATGGCTTACCTATCGGCCAAAAAATTCGTGC  
ACCGCGACCTCGCGGCGCGCAACTGTATGGTCGCCGAGACCTACCGTGAAGGTGCG  
GGGACTTCGGCATGACCAGAGACATCTACGAGACTGACTACTATAGGAAGGGCACGA  
AGGGCCTGCTGCCAGTGCGCTGGATGAGCCCGGAGAGCCTTAAAGATGGAGTGTCT  
CGAGCAGTAGCGACGTGTGGAGTTACGGCGTCGTGCTGTGGGAGATGGCCACGCTCG  
CCATGCAGCCCTACCAGGGGCTGTGAACGAGCAGGTGGTGCGCTACGTGGTGAGG  
GCGGCGTGATGGAGCGGCCGAGCACTGCCCCGACCGCCTGTACGAGCTCATGCGCG  
CCTGCTGGGCGCACCGCGCGGCGGCCCCGCCCCAGCTTCCTGCAGCTCGTGGCCGACC  
TCGTGCCAGCTCGCAGCCGCACTTCGCGACGCGCAGCTTCTTCCACACGCCGACAGG  
GCCAGGAGATGTACAAGCTGCAGCGCACGGCGCTAGAGGAGGAGCAGGAGCTGGCG  
GAGGTGAACGTGGGCGCCGTGGCCACGGGCTCGGGCTCCAACCTGTTCCGGCGTGTCG  
GGGCGCCTCGCCTCCTGGGTGCGCGAGCTGTGCTGCTGCGCTCGCGCACGGACGAC  
GCCGCCGCCGAGCCGCTGCAGCCGCTGCAGTCCGACCTCAAGTCGCCCCAACGGCGTG  
CCGCCCGCCGCCGCCGGCTGCTAGCGCGCCCCGCGCTGCCGACGCCGCCGCCG  
CCGCGCAGCCCGCCCGCCGTGCGCTAGCGGCCTCTGGTGGCTAGTGGTGACCGACAT  
GAGCTGCTGATACACCAGCGGCTGCTAGCGGCTGCTGGCGGCTGCCGCGCGCTGGTC  
GCGGCGCACACATCTACCTCAGGTGCGCCGCCGAGCCGCCGACTCTTCGAATCGTAG  
CCGTAGCCTAGTGTAATATCGTAATGATCGTCCGACTCGCGGGATCGTCTCTGACTGT  
AGTGTATCGGGCTCCCCGGACCCCTCCGCATTTATTACATTAGCGCGCCGGCGCCGCT  
ACAAGCTTGACAGACGCGAGGCGGCCTCGAGGCGTCGCGTCGCTGTCCGCTGCAGACG

CGAGGCGGCCTCGGGAGCGACGCGTCGCTGTCCGCTGCAGACGCGAGGCGGCCTCGAGAGCGACGCGTC  
AGAGCGACGCGTCGCTGTCCGCTGCAGACGCGAGGCGGCCTCGAGAGCGACGCGTC  
GCTGTCCGCTGCAGACGCGAGGCGGCCTCGAGAGCGACGCGTCGCTGTCCGCTGCAG  
ACGCGAGGCGGCCTCGAGAGCGACGCGTCGCTGTCCGCTGCAGACGCGAGGCGGCC  
TCGAGAGCGACGCGTCGCTGTCCGTTGCAGACGCGAGGCGGCCCGAGAGCGTCGG  
CTTTATTGTTTTATGAGAGCTCGACCGGAGATGGCGATGCTTTTCTTTTCGTCTGACGAT  
TCGTTTTTCATATCAGGAAAGTAATATTTTTGCTGAGACGATATTGAGTGAGTCGATTTGT  
CTCGACGTGAATCCTATATAGTTTACCTCGACGTTATTATATAGTTATAGATCGGTGTCAT  
TTTTGACATAGCCTATTAATGTAAAGTTTACCGTTTAAAGATGTAAAGCGTGTATAGTTTT  
ATGTAGGCGAGATCGTGTACAAATTATTTTTATTGATTTCTTGACGTATAGTTCGGTACC  
TTGCTACTGTTTCAAAGGTAAAAGTAATTTTGTAACGGGTGTCAAATTCGTTGAAGTTG  
TTATGTTGTTGTGGCGAGTACTGTTATTGCAAACGTACTTGCGATATGAATTTGTCACTT  
GTCCTAATCGATGCAGAATGCAACCGCTTATAATACTCAACTGTTGGATATACCGCTTT  
ATATATCAAGTTATTTTTGCTACTTGTATAAAAAATAATAATGTCAATATAAAAATTTAA  
ATTAAATTAACCACCAAAGATTTGGAAAATAAACGTCTAAATTTACAATTCTTTTATG  
CTGTTACTTATTGTAGCTTTGTTATCAATGTTTGCAAAGATAATTATGTAATTGTATTAGA  
GTAATTATACAGGGTCGTTTCAAATTAGTTGTAACCTGGTTTTAGTAGGAACGTGAAGCA  
ACACCCACAGTTTAGTCATAATGCGTAAGTTAAACGAGAAAAAGACGAAGAACGTGTT  
ATTTAGTGTTGCCGGCCATACGTAGCGATATTTATATTGCACAACTACAAGCAGGATG  
CGTGTTCTCATGTAGTTTGTGCAAGCGAGTACTTACTAGTACCAGTTAAGTGACAACGT  
TCAATTTAAATGACTTCATATACCGCAACAATTATTATTTAACTTAATATTATTGTGT  
ATGAATGATTATAGATGTATGTCATAATCGTGTTGCAGTTATCTCATTAAAGAATTTATGCT  
GAAAACAATGTGTTCCCATCGACTAAATGCAATAGATAATACCAGCCACTATTTTAA  
ATAAGTAGTTATATTACTTACATACTATTATTTTAAACAAATTTACATGTAGGTACTGAA  
AAGCCAAAGTATATGTAAAGATCGGCGCACACCGGCGAACACACGATACAGGATTTT  
AAGTTTTATAACCGAAGCGGGAACAGATCGCAGCGGAGCCACTGTGTGCCCCCAGCT  
CAAGTGCTGGCCCTTATGTGCAAACCTAATCAGTGAACCTATGTGCGGCTATAGCTACTA  
TGTATGGTAATATCTCACTAAGAAATTAAGTATGTTACTGAAATAGTTAATTTATG  
TAATACGAATATATTTATGAATGTAAGATAACGAGACGTAAAGTTAAATGAGAACATAT  
ACATAAATATTATGTATTCTTAGAGTTCAACATTTGTTGTGTTTCATATTTTTCCATTCATAT  
AATTACAGTTTTTATAGTAATTTAGTTCACTGAAATAGAAGTGTAGTAACACAATGTAAT  
AATAGGATATATTATTATAACTATGTAGTTCCTTTTTATTTTCTTCACATTAAATGTGCA  
GTGATTTTTTGGCAGCAAGTATGTAGATATTATTGACTTTGTTAATTTAATTAATGACGTA  
ACGCGAATTAGACATGGTCGTGGGGTGAATTTATTATGGTTTCACTATATGAATTTTCGA  
TATTGTTTTCTATTTGTAACAAAAAATATCTAGACGGCAAGATTTTAGTTAAATAAAATT  
ACGACACTCAAGCGTGTTAGCTACATTATAGTAAATAACTGTAAAAAATATAATTATAA  
TAAACATTCAACCAAAGTTAGACTCCAATATATACACCAGTCGTGAGTATTCGAGTCG  
GCAGCAGTCGCGGCTGGCCCGGCGCAGTAACATAGCTAACGATAGTGTGGTATAAGG  
GTATAACGAGTGCCTTCAGACATCCAGCCTTCTTGCATGCAGGTTTGTTGATTGTGTGA  
GGTGGACACCATGCCGACCCGGCCTAACATACTCTCTATTATACACACCTTTGTTTTAC  
GAGTAACGCTAGAATTTTCGATAACAATACTTTTCGATGGCATTAAAGTTGTTTTCATTTGA  
ACACAATCAAGAACCTCTGCCACAGAATACCAATTCAGCTTGTTGTGCGTTGGATATG  
GGCGATGTTTTACGAATGGCTTACCGATAGTATTTTATTTAAGTCGTTGACCACCTTTAT  
ATTGTGAATTAGGCAGAATCAGGTAAAAGTAATGTAAGTACCTAATAGTTGAGGAGCG

|                                             |                                                                                                                                                                                                                                                                                                                                                                                                                                                                                                                                                                                                                                                                                                                                                                                                                                                                                                                                                                                                                                                                                                                                                                                                                                                                                                                                                                                                                                                                                                                                                                                                                                                                                                                |
|---------------------------------------------|----------------------------------------------------------------------------------------------------------------------------------------------------------------------------------------------------------------------------------------------------------------------------------------------------------------------------------------------------------------------------------------------------------------------------------------------------------------------------------------------------------------------------------------------------------------------------------------------------------------------------------------------------------------------------------------------------------------------------------------------------------------------------------------------------------------------------------------------------------------------------------------------------------------------------------------------------------------------------------------------------------------------------------------------------------------------------------------------------------------------------------------------------------------------------------------------------------------------------------------------------------------------------------------------------------------------------------------------------------------------------------------------------------------------------------------------------------------------------------------------------------------------------------------------------------------------------------------------------------------------------------------------------------------------------------------------------------------|
|                                             | CGAGGGGGCGAAGACCTGGCCGACGGGGCTAGTACAAGTACACGTTTGTGTTGTTGT<br>CGGGGGCACAAGGCACGTTGCATCACTGATTGAACCATTTTAGTAAAATCGAAACGAT<br>CTCCGTTGAATCCGAAATCCATATATTGTTTTATATGTAAAATTTGCATAGTGCCTTTTGC<br>TCAATTATGAGGAATGTCGTAGATAGGTATCGTTAAGCGTAACCTAAATATATTAGAAC<br>TATAATGTAGTTCCATTTACGTTATTCGCTAATATTCCAGTGAGTGAGAAACACAAAGC<br>CCCACCAAACCTGAAGCTCTCGGCACTGGAATGTTACGCGGCGTAACGTGCAGCGCGC<br>GTGCGCACCGGCCGAGCGACCGCGCTCACACGAGCGAGCTGAGACACTCCACGCCA<br>ACACGCTCGCACGCACCCTACACAACACTCTCATAATTACCATCTTCTATTTCTCTGA<br>AATTAAGAAAAAGAGAAAAAATGTTACATCATCTGGTGTTCCCTTTATTAGCATTTATTT<br>AATTAGAAAACAAGCCTAGAAAACGTGGAGCGAGTGATGCGTGAGTGAGTGCGGC<br>GAAGTCTCGCACAACGTTGCCTCACACAGCGTTCCTTGCGGACTGTGCCTACTATCGA<br>CCTTTGTTACTTACGCTCTTGGTTTTATCAGTATTTGTTTAATTGTGATTATCACTTTACAA<br>GGCAGTTACATTACCTCATTTTTAGTGATTATATTATGCATAAATTATTGACTGATAAAAT<br>AATTTCCAAATGATTTATTTCTTGTGTGAATTGTGTATGTTTTGTATAAGTGTCGGGGTA<br>GCGTTGTGCTATATGCTCAATTTAGATACAATTTACCAAACGATTGAGATAGTGTACA<br>ATTTTATATAATTAATTTAATAAAAAACCGAGTACCTATTAATAATTTTAATATTATATTA<br>ATAAAAAAGGTTAAAAAAA                                                                                                                                                                                                                                                                                                                                                                                                                                                                                                                                                                                                                                               |
| <i>InR2</i><br>TRINITY_D<br>N6759_c0_g<br>1 | >TRINITY_DN6759_c0_g1<br>ATTTTATTTTCAGAGCCTGATTAGAGCATGAATTTTTTAGGGGCGCAGTTTTGAAAGCT<br>CGCACCGGGTGCATAAAAGGCTAGTTACGGCACTGCCACCAGTGATGTAATCTGATGA<br>CGAGTTGATACTTACCGCATTCCGATAGACTCGGAAACACGATCGTCTTTTATCTGAAT<br>CGATTCAATTACCATCGATTACCAAATTAAATTAAATACCTAATTACCTAACTACTACAA<br>TCAACAAACTTCATTTATACTGCTGTCCTTATCCCACACTGTAATTGGCGTAAAGACGG<br>AAAGAGATAACAATATGTCATACTTCGTTTACTTGTTTCCAATGGATTTCTTTGTTGTTA<br>ATACTTTAGAAATTGATCCAGACAATAGTAAAAATCCCATGATCAATATAGGGCCATGG<br>GAAACGCTACACAATGTGTTTTCCCATAAATGTAAGGTACTTACACTGTAGGCTATTCA<br>GTCGTTTTCGTATTGAGGAAGCGGTTAGCTGCGCGCACGCAGAAAAAGTATAAAAAAGT<br>TCGGCAAACCTCAAGGTGTCATGGCGAAAACGCTGATATGGTTGCTGGTCCACTCCCTC<br>CTTTTAGGCGGGATAACACCCCAAAGGTTGGATGTATCGAGCACAAACAGTTCGAGG<br>ATGTGTGAAGGAAGACTCATCAGGAGCATCATAGAGCTGAAGAAGCTAGACGGATGC<br>GTCGTCATCTTAGGAAGCCTGGAATATTTATAGAGAAAGCGAAGAAGGAGAATTTTG<br>TCAATATGACGTTTTGGGACCTGAGAGAGATAACAGAATATCTAGTAATTTATCGAGTG<br>AGGGAATTGGAGTCTGTGTTGCCAGTTGTTCCCGAATCTGACGAGGATAAGAGGACTG<br>AAGCTGTTGAACAACCTTCGCCTTGGTTGTGTATGACAACACGCACCTCAGAGAGATTG<br>GTCTCTACAGCCTCCTCAAAATCGACAGAGGAGGGGTGTCAATGTGGCAGCTGCCTC<br>AGGCGTGCTTCGTGGATACCATTGACTGGAAGGTGCTGGCTCCTAAGGCCCGGCATGT<br>GATCAGTCCACCAGATATCCAGGTGCAATGCAGCATACCGTGCTCTTGTTCTAGGAAT<br>GCTTCGTTGAATCGCTGTTGGAATAATAGAAAATGCCAGTTATTTCTGGATGGACCAGA<br>AGCTGACAAATGCAATGAGCAATGTATTGGATGCCGGAAGACTAATAAGAATATTTGC<br>TTTGTCTGTGTCGTCATTTACGCATAAGGGAAAATGCGTGACTCAATGTCCACCTGATAC<br>AATCCTTCTTCTGACAACCAGTATTGCGTCACCGAGGAAGAATGCTGGGACTTGGAT<br>CGATGGGTCTTCAACAACACCTGCGTTGCTGACTGTCCGATAGACTATAAAGTGAACA<br>ATAAGACCCATCCCATCTTCTGTGAGCCTTGCACTCATTGTGATATTACATGCGGTGATC<br>TAAAAATACAGTCTCTGGGCTCGATTCAAAATGCAGAAAGATGTGTTTACGTGAACGG |

|                                            |                                                                                                                                                                                                                                                                                                                                                                                                                                                                                                                                                                                                                                                                                                                                                                                                                                                                                                                                                                                                                                                                                                                                                                                                                                                                                                                                                                                                                                                                                                                                                                                                                                                                                                                                                                                                                                                                                                                                                                                                                                                                                                                                                                                                                                                                                                                                                                                                                                                                             |
|--------------------------------------------|-----------------------------------------------------------------------------------------------------------------------------------------------------------------------------------------------------------------------------------------------------------------------------------------------------------------------------------------------------------------------------------------------------------------------------------------------------------------------------------------------------------------------------------------------------------------------------------------------------------------------------------------------------------------------------------------------------------------------------------------------------------------------------------------------------------------------------------------------------------------------------------------------------------------------------------------------------------------------------------------------------------------------------------------------------------------------------------------------------------------------------------------------------------------------------------------------------------------------------------------------------------------------------------------------------------------------------------------------------------------------------------------------------------------------------------------------------------------------------------------------------------------------------------------------------------------------------------------------------------------------------------------------------------------------------------------------------------------------------------------------------------------------------------------------------------------------------------------------------------------------------------------------------------------------------------------------------------------------------------------------------------------------------------------------------------------------------------------------------------------------------------------------------------------------------------------------------------------------------------------------------------------------------------------------------------------------------------------------------------------------------------------------------------------------------------------------------------------------------|
|                                            | <p>ATCGTTGGTCATACACGTCAGAGCACTTGCAGGAGCCATGAGCGACCTTAGAAAAATAC<br/> CTCGGTCACATCCAAGAAGTTTCACAATACATAGCCGTTGAAGGCACCGATATCATAT<br/> CTCTAGATTTTCTCTCATCACTAAGAATAATCAAAGGCGAGAAGTTAAAAGATGATAA<br/> ATATATTCTCGATGTTAATCACAATAGCAATCTTCAAACATTATTTACTCCAGCTGTTAC<br/> AAAGAATCTCATAATCAAAAATGGTACAGCACGGTTTGATCAGAACCCAGTACTATGC<br/> ATGTCCAGAATAGATGAAGTGAAAAACCGGCTCCCGATGAAGCCAACATTCTTGGAG<br/> GTTCCCTATAGGCTCCAATGGGTACAGCGGTGCATGTAAAGAGGTGTCTTTCGACTTCA<br/> AAATAGCAGAGTCCAATGAATCTTCAGTGTTGATAAAGTTTTCTCCTGTTTCATGATCAC<br/> AAAATACATTACTCTGCTTTATATGTGCGATTACCACCAGGAGTTCACACGGCGGTAGT<br/> TCCTGAAACTTGCAGTGAGTTCGAATGGCACGCTACTGATGTTCCCTGCCGAGTTTCGAT<br/> GAAGGTTTTCGGTCTAACGAAATTGAATTCATTACAACCAGCTTCAACTTATGCTCTCTG<br/> TATCGAAATATACGATCCTATAAAAAAACTATTGATCAGGAGCAATATATTCAACTTCT<br/> CAACGCCTGTAGGAATTCCTGAGCCACCATTATCGTAGAGTTAGTTGCGTCTGCATCA<br/> GATGTTGTTGTCATACGATGGGTGATCACAAGATTATATGCCGCACATCGATTACTA<br/> CGAATTGGATGTGGCTTTGATTGAAAGGAGTACAACGAAATCTGCGGTAGATTATTGT<br/> AAACTTAAAGAAGATGCATATGAGTTAGACTACACTCGTCATGCATTAGTAAGGAGAC<br/> CGCCTCCAGAATATAACAGAGGCTGTGAATCAATGTGTGGCGTCTAGCTACTGTTACT<br/> CCTGGAGCGATGGTAGAGGAGTACTTTGACGTCTGCGATAAAATACATATCGGTTGTG<br/> GTAATCAAGAAAGCATGATATTAAATAATTCAACTTTTGGCAACTACGAGTATGTACGA<br/> ACTCTTATTTTGTAAATATTAGCAGCCCCAGAAATGATTTCCAAGTCGGTGGGCTGGC<br/> ACCCTTTAGTGACTATAAGTTTAGGTTAAGAGCTTGTGCAGGTGGTCATTGCAGCAGAT<br/> CATCAAAAGGTGTGGTCAGAACATTCAGTTTAAAAAATGCTGACATACCTTCTATCAC<br/> GTACTTGTATGCGAATCAATTCGGGCATATTTATGTGAAGTGGAGTCCTCCAAATGTAA<br/> CTAATGGCCCAATATTATCTTATTCCGTCGAAGTGTTGCCTAGAATTAATATCAATAATC<br/> TGATGCCTCAATCTTGGTGCATTTAGCTGATGAAACATGGATGTTTATTCAATCTGTG<br/> AGAGTGCCCAAATATTTAGTTTCGAGTGTGTGTCAAGACGCTCGCTTCAAGTAAATCTT<br/> GTGGTGATTGGATAAAAAATTACAAGTGTTACTGAGTCCAAGACGATTTTGTGTGGGCT<br/> GGAGTGACTTGTGGCTTTTTGATATACATTGCGTCGTGCATAGTGGGTTGGTTTAAGAG<br/> GAGGTCTCGCTATCGCGTCGATGTAGTGCCATTAGTCGATAGTTCATCTTCGTCACGTG<br/> TCGAGAGCGAGCCCCCGCGCTGATGCTATCAGATTTCTGTCGCAATTCATACGATATCC<br/> TTAGATTAATGTTGTATTGTGATACTACTGTAACGATTGATAAAAAGTGATTATGATAG<br/> TTGACATCATTGCGAGGAAAAGCCTTTTGTAAACGAGTTTGGCTGACTGTAATACATA<br/> CCAGTACTTTGTGTACTGTGATGAAATCCTGACGTTTTTCGGGACGTGTGTCCGCTTAA<br/> ACGTCCATTTTTGTGATGATGGTTTTAATGAAATTGGTTTTATGTTACGCAAACACTCTC<br/> GTCTGTCATTTTAACAAAGCCTTTGAAATGTTTGATTTTAAAAGCTTTGCCTGATAATTT<br/> CCTTACTTTTACGCAGTGCAATTTCAAATGTATATTTAAAAATAACATTTTGTATGGAA<br/> GTTGTTATTATTAATAATAAATGAGATTAACAATGTGTCAG</p> |
| <p>PDK,<br/> TRINITY_D<br/> N468_c0_g1</p> | <p>&gt;TRINITY_DN468_c0_g1<br/> GCGTCAGGTCGTTTCATTGCATTCCAGTAATCCAGTAGAAGTTGTCAGTCCGCAACGC<br/> GCCGTTTTACCGAACGGACGTACGCGCGCAAATAACACTAGAAAATTATCGTTGTTTA<br/> TTTATTTATCTTGATTGCATATCTCTTAAATTTATTTGTGTTTAATAATCGTCTGAACTCTA<br/> TTTGTGAAAAATAATTCTTGATTTAGAACAATAATCAACCTTCATGAACTGTGATCGTG<br/> TTTTTGACCGTTTCAAACAATAACAAAACGGTAGAAAATAAGTGCGAGACAAGTC<br/> GAAATGAGCGGATTGACCAACAGAGTTAAAAGAGGTTTCGAGGGGTAGTGCAACTCTT</p>                                                                                                                                                                                                                                                                                                                                                                                                                                                                                                                                                                                                                                                                                                                                                                                                                                                                                                                                                                                                                                                                                                                                                                                                                                                                                                                                                                                                                                                                                                                                                                                                                                                                                                                                                                                                                                                                                                                                                                                                                                            |

CTCGAAGCAGCTAACAGGATTTTGGCGTTACTTGGCGTTAGCTCCACGAAGCGCGGGA  
AACAGCCCTCGCCCAAATCTAAGATCAACGGTCGAGCGTCTAGTGAGTTACGGGCCC  
CAATTGCTGCGGCCGAGACCATAGTGGAGTCGCCGATCAAGATGCAAGCAGCGCCTG  
CGCCCGCACCGGCCGCGCCGGCGCCCGCGGCCCCCGCGCCGCCCCGCGCCCGCCGCG  
CCCACCGCCTCGCCGGCCGCCAGCCAGGCACAGAAGCCCACCAAGCGAACTGCTAA  
AGACTATATTTTTGGCAAATTAATTGGCGAGGGATGTTACAGCACCGTATTTCTTGCAA  
AGGATATTCACAGTGGAAGGAATATGCAATTAAAGTGTGTGAAAAAATTACATCAT  
CCGAAAAAAGAAAAGAGAGTACATTAAACGCGAAAAAGATGCCTTGAACATGTTGTT  
CAATGTAGCTCATGGTTTCGTGAAACTGTACTGCACATTTCAAGATGAAGAAAGACTG  
TACTTTGTCTTGTCTTTTGCAAAAAATGGCGAATTGCTGTCTTACATAAATCAAGTTGG  
CTCTTTTGAGTTAAATGTAGCTAAATTTTATGCGGCTGAATTATTGATGGCCTTAGAGAA  
AATGCACGACAAGGGAATCATTACCGTGATTTAAAACCGGAAAATATATTATTAGAT  
GAAAATATGCATTTGCAAATTGCTGACTTCGGAACGGCTAAAATTCTTGAACGTGAAG  
AGATTCGTGCCTCACCGAATAATGCAGATAGTGACACGCAAAATGAACGCTCTAGAA  
AAATTAGTTTCGTTGGAACACCGCAGTATGTTAGTCCAGAATTATTACACGACTGCGTA  
GACACACGTGCCTCAGACCTGTGGGCGTTGGGATGCATCATTACCAAATGATTTCCG  
GCTTGCTCCGTTCCGCGCAGCCACAGAGTTTCTCACCTTCAAAAAATCCTCAAGAT  
GGATTTCGAATTCCCAGAAGGGTTTCCCGCTGACGCAAAAGATCTTGTGAAAAGCTC  
TTAGTTCTAGACCATAACCAAACGACTTGGAGCTAATGATAAAGGAGAAACATATGATA  
GCATTCGCAATCATCCGTTCTTCGCTGGAATCGACTGGGACAGTTTGTGGGAGCAGAC  
GCCCCCTACTATCAGCCATACTTACCCGGAGGATCTTTCGGATACAATGTACCCGATC  
ATCTTGAACCAGGACTGGGCAACAAGCAACTCGTTCGACTGTGGGAATTCGACTTATC  
TACCTCTAAAGGAATCTTAAACATCAGCCCCGAAGAAAAACGTCGTCGTCTCGAAGT  
GCAATCTCGGGAGAGCAAGTGGCACCAGTTCGTGGATGGAGAGCTCATTCTGAAGCA  
AGGCCTGGTCGACAAGAGGAAGGGACTGTTCCCGCGACGCCGCATGTTGCTGCTCAC  
CACCGGACCGCGCCTATTCTACGTCGATCCAGCTAACATGGTGCTCAAGGGAGAGATC  
CCTTGGTCACCCGAGTTGCGGGTTCGAAGCCAAAACTTCAGAATATTTTTAGTGCACA  
CGCCAAACCGTACATATTATTGGAAGACCCCGATTTCGTATGCTTTGGAGTGGGCAAG  
CGTAATCGACGAAGTGCGCATCGGTACATATGGGCGGGACACGACTTAAGCGACGGC  
GCGGCCGCAGCTCCGAGTCGCGCCCCGCGCCGCCGCGGCCCGCGGGCCCCAGCGC  
CCGCTCCTCGTACCTCACACGGCGAGTTCACACTTCTAGGTTACTTCTAGCCTTGATTT  
AGAGCATGGCAAATTCCAAGCCGAAAGCTTTCGCGTCGATGATCGACCTCGTGCGTGT  
CCCTTGTCCCGCGCCGGCCGGTGCGGGCCGGCGGGCGTTGCGGGCGCCGAATGCGGG  
CGCGCTACATATGTTACAGCGCTCGCACTCGCCCGCGCGGCCGCCCGCACGCCCCG  
ACGCGCCGCCGCGCCGGCCGCTGACGAGACGACGACGATCGACCCTGCTCGATCACT  
GTGGATACTGAATGACTGATTCCTATTAATAATAATATCCCGACTATCTTAAATTATTCTA  
ATTTAAGTTCCTTATTTAATTGTGGAATACCGACGATGATGATGTGTAAATATGTCTTAA  
ATTATTATTGCGATTGCTTAGTAATAGTTAATTGTGGGGCGATGTATGTTTTATTGTATAC  
AGGCCTCTTGTAAGAATGGACTTGTTATTCACCACCTGCGTGTTACGAAACCCATTCC  
GGTTGGTAACTAGGCAATTTATAGCTAAATTTAATATTTATGTTTAAATTATTTGCC  
AACGGAATGTGACTGCTGTACAGTTATAACCGTAGAAAATTATGATTGGTATGTTTCTA  
TATTCTACTTCAACTATGTTTATCGGTGACAATTGGAAAGTAAAGATAAGAATTAGCAA  
AGTTGTATATTTTAAATTGAATTAGCAATTGTCACACACTGGTTGCTGTAGAAATAGAA  
GCAGCTAGACGTAAGGAGGGTAGCTTCTTCACTAAATAATTGAGAGTTGGTGCGAACC

|                                                   |                                                                                                                                                                                                                                                                                                                                                                                                                                                                                                                                                                                                                                                                                                                                                                                                                                                                                                                                                                                                                                                                                                                                                                                                                                                                                                                                                                                                                                                                                                                                                                                                                                                      |
|---------------------------------------------------|------------------------------------------------------------------------------------------------------------------------------------------------------------------------------------------------------------------------------------------------------------------------------------------------------------------------------------------------------------------------------------------------------------------------------------------------------------------------------------------------------------------------------------------------------------------------------------------------------------------------------------------------------------------------------------------------------------------------------------------------------------------------------------------------------------------------------------------------------------------------------------------------------------------------------------------------------------------------------------------------------------------------------------------------------------------------------------------------------------------------------------------------------------------------------------------------------------------------------------------------------------------------------------------------------------------------------------------------------------------------------------------------------------------------------------------------------------------------------------------------------------------------------------------------------------------------------------------------------------------------------------------------------|
|                                                   | <p>GATCCGATGGCGATCGGATGCCTTACTTTACGACTCAGTTGAGTATAGTCTGCTCTGA<br/> GATAGGAAATGAACACATTGTTGAGGAGTTTCAATGCTTTTTATTGTGCAAGTACTTG<br/> TGCCCTTTAATTCTAACATAGCAAAGGTATACGGATAACGCCACCAAAGGTGACAATT<br/> ACTGCTATTTCAATTGCTTGGTAATTAATTGTCTAAAATATATTATTTTTGTTAATGCAGTC<br/> GAATTAAGACATTGGGATTGCTTAATGGATAGTGACTAGTGCAAATTTGTTTTTTAATGT<br/> TTTGTGTTGTTATGAACAGTGATTTTATGGCCATAGCAAATATTCAATGTCAATGTTCTA<br/> AAATTGTATTTAAATTGTAATGGTGAACCTTATCATTTAATCATTTTATAATAGCAGGTATA<br/> TTAAAATGCCTAAAACCTTGCCTGTAATATTTAACATTAGGGCTTAATGGGATTTAATCCA<br/> TAGTTCAATACGAAACCCTCATATAGCAAAATGTAGAAGACTAAGAATTCATAAGTA<br/> GTATGAAGGACTGTTTTATTCAATTCATAGCGTATTATGGGCAATGAGATACAATATTAT<br/> TAATTGGTCAGCGTAAATTGGACTTTTCCATGACATTGTTATGAATAATTAATAATTA<br/> ACCTGCATTTAAAATTTAATAACTGTAACTATTGTAATTATATTTTACAACATTTGTATT<br/> GCATAAATTCCATAAAGTAACAAAATAAGAAATTGAAAATAAATTGAAGTTGATTTTT<br/> AAA</p>                                                                                                                                                                                                                                                                                                                                                                                                                                                                                                                                                                                                                                                                                                                                                         |
| <p>TO1,<br/> TRINITY_D<br/> N1529_c1_g<br/> 1</p> | <p>&gt;TRINITY_DN1529_c1_g1<br/> ACACTGCCCTCATTCATCACGCCGTGCTCCCGCTCAGATCCCCAGCTGAACGCCTGCA<br/> TAGAGAAGGTGATCACCGCCGCGGCTCCAAGTTCACCGAGGGCATCCCAGAGCTGG<br/> GCATCAAGCCGCTGGACCCCGTGGAACCTGGGCACGGTGTTCTGTTGACAACCCCGCCT<br/> TGAAGCTCACCTTTACTGACACCGTCGTTACTGGACTGAAGGGATTTAGGGTCAATTC<br/> ATACAAGATCAACCCAGACAAGGGTAAGGCCACCCTGGACTTCACCGCCAACGTGAC<br/> GCTGAAGGCGCACTACGACATGGACGGACAGGTTCTCATCCTGCCCATCAGGGGCAA<br/> CGGACAGTCCAGGATCAAGATCACGAACCTAAACATTGTGGTGAAGTACGACTTCGT<br/> AGAGAAGGACGGGCACTGGGTGGTGCCAGCTACAAGGACCACTATAAGATGGACC<br/> GCGCGCAGTTCAAGTTCACGAACCTGTTCAACGGCAACAAGGAACTCGCACAAACG<br/> ACAGAACGGTTCATAACGAGAACTGGGAGATCATTATGAGCGAGATAGCTCCCGGC<br/> GCGATCAAACAGATCATCAAGAAGTGCGTCGATCAAGTCAAGAAGTTGTTACATCT<br/> GTACCGGCCAGAGTATTGCTACCTTGAAGTCCTGAACGGTGAAACCATCCACCAAGTA<br/> ATAAACATAAACTGGGAGCCTGTGATGCGGGACATAGGGCCGGTCGCCTTCCAACAA<br/> ATCATCAAAGCGTGCGTCGACGAGTCCAAGAAGCTGTTGCGAGCTGTTCCACTCAGC<br/> CAGCTGCTGCTGCCTTGAGTCTCTTCTCCGTTTGTGTCAGTTACATCTCGAATGTGCAGG<br/> TCTTTTTTGTGGAAGCCAACCTTTTTCTGACTGAATATAGCACTCTTCTTCTGTTGTTATT<br/> ACCGCCGAAGGAACTTTTCCTACAAATTGGTAATGATTGTTTCTTAGATAAATCACATT<br/> GTCTTCGTTAGTAGGATTGGTGTTCAAAATTCAGTAAATTATTAAAGTCGGTACAATCG<br/> CTAAAGTCTGCGCTCCTAGATACACCATTCTACAATTCTACCTATCTGAAATCCATCTAT<br/> CTGTCTGAAGATCAATAATTTTCACTACGTTACATTAGGACATTCAAAAAGGATCGCAC<br/> AACTCGAGGAGTAACTGCATAAAGGAACCTTTAATTTAATTTTCAACTATTTTGTTCG<br/> TTGAAGCACGTCCCGCGTAAATCTGCACAAAATAACTTCTGTACAAGACTGTGTTTGA<br/> TCATTTGTTTGTAGGCGCATAAGATAAGTTGGTTTGTAGTAATTGTGATAATTAGCCTA<br/> AGTTAGTTAAGTTGGTTTTAGATTTAATTTATTCAAAAATAAATTGGTGAAAACGTGAA<br/> AAAAAAAAGAAAACAAAA</p> |
| <p>TO2<br/> TRINITY_D<br/> N3829_c0_g<br/> 1</p>  | <p>&gt;TRINITY_DN3829_c0_g1<br/> CAACAATTATGAGACGAAATTGAGAAGCAATCATATTCGCAAGCGTTCCCGCCAATT<br/> CGGATAAATATGGCGGGTGAACCGCGCGCGCCTCAGTCGCCAAGGCGCATGCGCGAG<br/> AACTGTCACCTTCGTTTCGAAAATTGCGAATGTGTTGCAGAGAGTGAAAAATAAAAAA</p>                                                                                                                                                                                                                                                                                                                                                                                                                                                                                                                                                                                                                                                                                                                                                                                                                                                                                                                                                                                                                                                                                                                                                                                                                                                                                                                                                                                                                        |

|                                                  |                                                                                                                                                                                                                                                                                                                                                                                                                                                                                                                                                                                                                                                                                                                                                                                                                                                                                                                                                                                                                                                                                                                                                                                                                                                                                                                                                                                                                                                                                                                                                                                                                                                                                                                                                                                                                                                                                                                                                                                                                                   |
|--------------------------------------------------|-----------------------------------------------------------------------------------------------------------------------------------------------------------------------------------------------------------------------------------------------------------------------------------------------------------------------------------------------------------------------------------------------------------------------------------------------------------------------------------------------------------------------------------------------------------------------------------------------------------------------------------------------------------------------------------------------------------------------------------------------------------------------------------------------------------------------------------------------------------------------------------------------------------------------------------------------------------------------------------------------------------------------------------------------------------------------------------------------------------------------------------------------------------------------------------------------------------------------------------------------------------------------------------------------------------------------------------------------------------------------------------------------------------------------------------------------------------------------------------------------------------------------------------------------------------------------------------------------------------------------------------------------------------------------------------------------------------------------------------------------------------------------------------------------------------------------------------------------------------------------------------------------------------------------------------------------------------------------------------------------------------------------------------|
|                                                  | <p>GAAACAAAAATGTTTGATTCAATTATTGCTTGTGGCTTTTTTGACGAGTTTCGTGAATGCT<br/> GAGAATAGTTTACCTGAAGATTTACGAGATGCAGACAAAAAGACGCAAAACTCAAC<br/> GAATGTCTCAAAATGGCTGTTCTTACGCACTCAGAAGGATGAAGAAAGGTATCCCC<br/> TCGCTGTCAGTCCCGGAGATGGAGCCGCTGCACGTGGACAGCATCAACGTGGACTCG<br/> GGCTCCGGCCCCGGTCGTCATCACGCAGATGTACAAGAAGATCAAGCTACATGGGCTC<br/> ACGGATTCTGTGCTCACGCTTTACAAAGCTGATCTCAAAAACCTATAGACTCAGGACAG<br/> ACTCGATCACGCCAAAGATGGAGTTCATCGCTGACTACATCATGAGGGGCAGGATTCT<br/> TCTGCTGCCCATCCAAGGAAAGGGTATCGCTAACATCACCATGGTGAACCTGGTAGTG<br/> AAACACGACCTGATCGGCGAGCCGGTCGTCCGGGACGGACAGACGTACATGCACATC<br/> AAGGACTACAGGGTCAAGTTCATCCCGCAGCGCGTGTGCTGCACTTCACCAACCTCT<br/> TCAACGGAGACAAGGTGTTGGGAGATAACATGAATGAATTCCTGAACTCAAATTCGG<br/> ACCTCGTCTTCAATGAACTGAAAGAATCCTACGAGAAAGCCCTGAGTTCAGTGTTCCA<br/> GAATGTCACCAACGAAATATTTGACAGAGTGCCAATGAACAAAATATTCCTCGAAAA<br/> CTAGTTTGTCTCCATCAAGCTATGTAGGCATAGCAAGACTTTTAGCCTAGTTGCAAAAT<br/> AGATGTAAGACAATCCTTTTGGGTAAGCGAGGAAAAGAAATACACCTTCCAGTATGTG<br/> GTATTTATTAAAGCTGCTTTAATTAGACTTCGTTATATTAAGTTACAATAAATTTTATAAT<br/> AATTTAGTTTATAAGTAAAAAAAAGTACTTATGAAAATTTGATGTTGTTTTATTTGGTTT<br/> TACGAATTTTTTAAGATTTGCCAGCTGAAATTTTGTGGGAGTCGATTGAGACCGCTCCA<br/> CCGCGACTGGGAGGATCGCAGACTCTTGCGCACAGGAACAACCTAGAACATTGAAAA<br/> AAGCGCCATCTCTTATTCGTTTCTAGTAAGCTAGTCGATAGGTAGGCTGGTGCATGATG<br/> GGCTCCGTGTCCTTCTTGGGAGGTTTCTCTCGTTCAGCTCCACGTCGGGTCCCTGGTG<br/> GTTTCAGACGAGCTTGCTGCGCGTTTCGTAAGCAAGCTGTTTTGCAGAAAGCCTCGTTT<br/> ATTATGACTAATATTTCCAATCAGGAGTAAGTATATAATGAGCCCCAATATGAGGGCATC<br/> GTACTCCATGGTTGAAGATATTAGCAAGCCCTGCGAGGCCTGGTGGCTCTGATGAGTT<br/> CCCTGATGGAGCAGAAACAAGCGAATATGATTACTAGAAAAATAGCAATCTGCCAGA<br/> AATTTGCCACCAGAGATTCGCTTACTGGCCCCGCACTCTTCGCCATCAGTTAGAATAA<br/> ACAAGCCAACGGGTTCCCATTCGCATTCTAGTCAGGCGGAAGAGTTCTCTGATGGAA<br/> AGGAATGCAGCAAACACGATGACCAGGAAGAAAGAGGTGTTAAATGCTTGTGTGAG<br/> CACAGAAACCACGCTCATCATCTGGATGAGCTCAGGGTGTCTTCAGGGGACCATCAC<br/> GGTGAATTTTCGCTGGAGTGTTGGACGGATTTGACATGGAACCTGACCACAGGAACCTGA<br/> CAATCTGTTCTCTGTTGACGGACG</p> |
| <p>TO3<br/> TRINITY_D<br/> N9355_c2_g<br/> 1</p> | <p>&gt;TRINITY_DN9355_c2_g1<br/> CGATGTTCTGCTGTTTCGCACTTTTAGGGCATGACCAACTGTAGGAAGCGAACACTATT<br/> AGCCAAGACGTGTCCTCTTTGTTCAAGCACTGCTCACATGACATAACCGTAATTACTC<br/> ATCAACTTGCTCGCACACCATAAAGAACCTTACAAATCCTATAATTTCTTCGTCCTGGC<br/> GGACCGAGCCAGTAAATAGTTTCGCAGGCGGTGGGGAGCCCACTCAGGGATGTCGAA<br/> AATCTTGAGCGAATAAAACACATAGCTCCTTGCTTTACCTCAAACAAAATGAGCCGT<br/> GCGCCCCGTCCGCTACCATCCAAGCGCGAGCCTATTGCTAACTAAAACCGCCGAACA<br/> ACGGACGCGGGCTAATTTTAAAATTTCGAACGTCAAAAAAACATTTCAATAAAAAAA<br/> ATACGAATTCAAATAAAAGAAAAATAAAGTGCATTTTCGAAAATCGAACGTTCAAGTGA<br/> AAAATGGATTGTTTGAAATATTGAAAAAGTTTTAAATTTTCTTTTTTATAAAAATCATTT<br/> TGTTAGTTATTAAAATTAGAATTTTAATTTTAAACAAAAATGAAAATGGCCGATCGTTGT<br/> GTTTTGTCGCTGTTGATGTTGAGTTTGACGGTTTTATGCCGCAACGGGGAAGCTGCAGA<br/> AGATGCGAGTGCAGCCAAAATACCGGAATACATCCAGCCGTGTAGTCAAAAAGATGC</p>                                                                                                                                                                                                                                                                                                                                                                                                                                                                                                                                                                                                                                                                                                                                                                                                                                                                                                                                                                                                                                                                                                                                                                                                |



AGAGTTGGATACTTGTATCAAGAACTCGTTCAACCACCTGCGGCCGTACCTGTCCAGA  
GGTATCCCTGAACTGGGGGTGCCTCCTGTGGAGCCGCTCTTCATCGATCGGCTGGTCAT  
GGCCAACGACGCTGGACCCGTCAGGGTGACCCGAGCCTTCAGCAACATCACTGTTAT  
CGGACCTAGTAATTATAACCATTACTAAAATCAGGTCTGACTTGAAGAAGCTTCGCATCG  
ACATGGGGCTTGTGCTGCCTCGCATCGAGATCACTGGAAGATACGAGGTTTCCGGACA  
GGTGCTGCTGTTCCCCGTCAGGTCTCAGGGAGACTTCTGGGCTTCTTTTGGTGACGTGG  
TGGCCATCGCGAAGATCTTCGGCAAGGAAACCACTCGGGACAACGTGAAGTACATGT  
TGGCGGACAGACTGCTGGTGGACTTCAAACCTGAGGACCTCTCGCTTCAAAGTTAAGG  
ATACCGTCAACCATGGCAGCATTATTGGCGAGGCGATGAACCAGTTCTTGAATAACAA  
CGCAGCGGAGATCATCGAGGAGATGAGGCCGCGCCGCTCCGCGTCCATAGCGAAGCA  
CTTCCAGGCGTTCGTCAACGCCGCTTCTCCAAGATCCCCATCGACGTGTGGCTGACG  
CCTTAGACCAGTGAGTGAACCTTGTGAACAGACAGTTTTGTATGTAGTTCTGCAAGCCT  
AGTGCGGGTTGGTTTCACGTTTTTGCCTTATGACGTGCGGCGCTCCAATTGGCCCCGCT  
CATAACCAATCAGAGAGTTAAACGTTTCGTTACCGTGAAACAACTCGCACTAAGGC  
CTCCGGTATATTTACTGTTGTGAATTTTTCTAGGAGTATTTTCAACAATTTGTAGACTTTA  
TGTTTATTAAGTATGATTTGATGTTAGTACAAATTCCAAATGTTGAAGATGTGTGAA  
AAACCGAGTGTATTTTTCTGAATCTTTGCGTAGCTATATTGTATGCAACCATTTCTTA  
AGGTCAATTACGACTGACAATATTTACTTGAATGACATGATATTGATAATTGCCTCAATC  
GTTTAAAGTAACTATCAATATTTGCATTATCGGCGTCAATATCGTCAATCAGAATTGTC  
CTTTCCGTAACCTCTATAAATCCCTGACTATTTTATTTTACCAACCTTCGCGTTTCATAT  
TTGTGTGTTGCAGTGTCTTAAGATCTCAAAACATTTTCTTATTATGTTTTTTTTTCAAAT  
GACAACTTAAAAACATTTAACTCGATAAAATCACTGTGTAAAGTCGAAAATATGTAAA  
ATTGTGATCTTGATTTAATTAACCTATTCTGTAATAGATCCCTTTAACGAAATGAGATAA  
TTTTATAACATATTCGTTTCGCTCCTTTTCAAAGATATAGTGTGATTATTGTGTGTTTCAGTG  
CCTAGTGCGAGTTGTTTCTACGTTAACGCGATCGACACGTTTATGATGTTTCGGTATTCCG  
ATTGGCTCGCTCCAAGCTTTTAAACCAATCAGAGACCCGTACGCGGT

| Gene                                        | BLAST results                                                                                                                                                                                                                                                                                                                                                                                                                                                                                                                                                                                                                                                                                                                                                                                                                                                                                                                                                                                                                                                                                                                                                                                                                                                                                                                                                                                                                                                                                                                                                                                                                                                                                                                                                                                                                                                                                                                                                                                                                                                                                                                                                                                                                                                                                                                                                                                                                                                                                                                                                                                                                                                                                                                                                                                                                                                                                                                                                                                                                                                                                                                                                                                                                                                                                                                                                                                                                                                                                                                                                                                                                                                                                                                                                                                                                                                                                                                                                                                                                                                                                                                                                                                                                                                                                                                                                                                                                                                                                                                                                                                                                                                                                                                                                                                                                                                               |                                    |             |                 |             |             |             |          |                                |          |           |                                     |                                                                  |                                  |      |       |     |     |        |          |                            |                                     |                                                              |                                 |      |       |     |     |        |          |                            |                                     |                                                                 |                                  |      |      |     |     |        |          |                            |                                     |                                                              |                                  |      |      |     |     |        |          |                            |                                     |                                                                    |                                    |      |      |     |     |        |          |                            |                                     |                                                                                                              |                                 |      |      |     |     |        |      |                                |                                     |                                                                                                                   |                                   |      |      |     |     |        |      |                                |                                     |                                                               |                                  |      |      |     |     |        |          |                            |                                     |                                                               |                                 |      |      |     |     |        |          |                            |                                     |                                                                                                                |                                   |      |      |     |     |        |      |                                |                                     |                                                              |                                 |      |      |     |     |        |          |                            |                                     |                                                                |                                   |      |      |     |     |        |          |                            |                                     |                                                                                                                   |                                   |      |      |     |     |        |      |                                |                                     |                                                                    |                                   |      |      |     |     |        |          |                            |                                     |                                                                                                              |                                 |      |      |     |     |        |      |                                |
|---------------------------------------------|-----------------------------------------------------------------------------------------------------------------------------------------------------------------------------------------------------------------------------------------------------------------------------------------------------------------------------------------------------------------------------------------------------------------------------------------------------------------------------------------------------------------------------------------------------------------------------------------------------------------------------------------------------------------------------------------------------------------------------------------------------------------------------------------------------------------------------------------------------------------------------------------------------------------------------------------------------------------------------------------------------------------------------------------------------------------------------------------------------------------------------------------------------------------------------------------------------------------------------------------------------------------------------------------------------------------------------------------------------------------------------------------------------------------------------------------------------------------------------------------------------------------------------------------------------------------------------------------------------------------------------------------------------------------------------------------------------------------------------------------------------------------------------------------------------------------------------------------------------------------------------------------------------------------------------------------------------------------------------------------------------------------------------------------------------------------------------------------------------------------------------------------------------------------------------------------------------------------------------------------------------------------------------------------------------------------------------------------------------------------------------------------------------------------------------------------------------------------------------------------------------------------------------------------------------------------------------------------------------------------------------------------------------------------------------------------------------------------------------------------------------------------------------------------------------------------------------------------------------------------------------------------------------------------------------------------------------------------------------------------------------------------------------------------------------------------------------------------------------------------------------------------------------------------------------------------------------------------------------------------------------------------------------------------------------------------------------------------------------------------------------------------------------------------------------------------------------------------------------------------------------------------------------------------------------------------------------------------------------------------------------------------------------------------------------------------------------------------------------------------------------------------------------------------------------------------------------------------------------------------------------------------------------------------------------------------------------------------------------------------------------------------------------------------------------------------------------------------------------------------------------------------------------------------------------------------------------------------------------------------------------------------------------------------------------------------------------------------------------------------------------------------------------------------------------------------------------------------------------------------------------------------------------------------------------------------------------------------------------------------------------------------------------------------------------------------------------------------------------------------------------------------------------------------------------------------------------------------------------------------------------|------------------------------------|-------------|-----------------|-------------|-------------|-------------|----------|--------------------------------|----------|-----------|-------------------------------------|------------------------------------------------------------------|----------------------------------|------|-------|-----|-----|--------|----------|----------------------------|-------------------------------------|--------------------------------------------------------------|---------------------------------|------|-------|-----|-----|--------|----------|----------------------------|-------------------------------------|-----------------------------------------------------------------|----------------------------------|------|------|-----|-----|--------|----------|----------------------------|-------------------------------------|--------------------------------------------------------------|----------------------------------|------|------|-----|-----|--------|----------|----------------------------|-------------------------------------|--------------------------------------------------------------------|------------------------------------|------|------|-----|-----|--------|----------|----------------------------|-------------------------------------|--------------------------------------------------------------------------------------------------------------|---------------------------------|------|------|-----|-----|--------|------|--------------------------------|-------------------------------------|-------------------------------------------------------------------------------------------------------------------|-----------------------------------|------|------|-----|-----|--------|------|--------------------------------|-------------------------------------|---------------------------------------------------------------|----------------------------------|------|------|-----|-----|--------|----------|----------------------------|-------------------------------------|---------------------------------------------------------------|---------------------------------|------|------|-----|-----|--------|----------|----------------------------|-------------------------------------|----------------------------------------------------------------------------------------------------------------|-----------------------------------|------|------|-----|-----|--------|------|--------------------------------|-------------------------------------|--------------------------------------------------------------|---------------------------------|------|------|-----|-----|--------|----------|----------------------------|-------------------------------------|----------------------------------------------------------------|-----------------------------------|------|------|-----|-----|--------|----------|----------------------------|-------------------------------------|-------------------------------------------------------------------------------------------------------------------|-----------------------------------|------|------|-----|-----|--------|------|--------------------------------|-------------------------------------|--------------------------------------------------------------------|-----------------------------------|------|------|-----|-----|--------|----------|----------------------------|-------------------------------------|--------------------------------------------------------------------------------------------------------------|---------------------------------|------|------|-----|-----|--------|------|--------------------------------|
| <i>InR1</i><br>TRINITY_D<br>N1670_c0_g<br>1 | <table><tr><th></th><th>Description</th><th>Scientific Name</th><th>Max Score</th><th>Total Score</th><th>Query Cover</th><th>E value</th><th>Per Ident</th><th>Acc. Len</th><th>Accession</th></tr><tr><td><input checked="" type="checkbox"/></td><td><a href="#">Mythimna albipuncta genome assembly chromosome_1</a></td><td><a href="#">Mythimna albi...</a></td><td>4863</td><td>10709</td><td>89%</td><td>0.0</td><td>91.37%</td><td>34473587</td><td><a href="#">OJ815959.1</a></td></tr><tr><td><input checked="" type="checkbox"/></td><td><a href="#">Mythimna impura genome assembly chromosome_1</a></td><td><a href="#">Mythimna impura</a></td><td>4732</td><td>12316</td><td>89%</td><td>0.0</td><td>90.93%</td><td>36229551</td><td><a href="#">LR990340.1</a></td></tr><tr><td><input checked="" type="checkbox"/></td><td><a href="#">Mamestra brassicae genome assembly chromosome_1</a></td><td><a href="#">Mamestra bras...</a></td><td>4008</td><td>8256</td><td>74%</td><td>0.0</td><td>89.04%</td><td>23412814</td><td><a href="#">LR990988.1</a></td></tr><tr><td><input checked="" type="checkbox"/></td><td><a href="#">Amphipoea oclea genome assembly chromosome_1</a></td><td><a href="#">Amphipoea ocl...</a></td><td>3546</td><td>6184</td><td>61%</td><td>0.0</td><td>86.62%</td><td>26428330</td><td><a href="#">OX243862.1</a></td></tr><tr><td><input checked="" type="checkbox"/></td><td><a href="#">Melanchra persicariae genome assembly chromosome_1</a></td><td><a href="#">Melanchra persi...</a></td><td>3518</td><td>9168</td><td>80%</td><td>0.0</td><td>86.49%</td><td>25931581</td><td><a href="#">OX376644.1</a></td></tr><tr><td><input checked="" type="checkbox"/></td><td><a href="#">PREDICTED: Helicoverpa zea insulin-like receptor (LOC124634694), transcript variant X1, mRNA</a></td><td><a href="#">Helicoverpa zea</a></td><td>2915</td><td>5691</td><td>85%</td><td>0.0</td><td>78.47%</td><td>8117</td><td><a href="#">XM_047170356.1</a></td></tr><tr><td><input checked="" type="checkbox"/></td><td><a href="#">PREDICTED: Helicoverpa armigera insulin-like receptor (LOC110377777), transcript variant X1, mRNA</a></td><td><a href="#">Helicoverpa ar...</a></td><td>2881</td><td>5684</td><td>85%</td><td>0.0</td><td>78.33%</td><td>8128</td><td><a href="#">XM_049835939.1</a></td></tr><tr><td><input checked="" type="checkbox"/></td><td><a href="#">Amphipoea lucens genome assembly chromosome_1</a></td><td><a href="#">Amphipoea luc...</a></td><td>2861</td><td>6385</td><td>61%</td><td>0.0</td><td>85.94%</td><td>25775902</td><td><a href="#">OX382356.1</a></td></tr><tr><td><input checked="" type="checkbox"/></td><td><a href="#">Apamea monolypha genome assembly chromosome_1</a></td><td><a href="#">Apamea monog...</a></td><td>2844</td><td>6621</td><td>63%</td><td>0.0</td><td>85.78%</td><td>22418240</td><td><a href="#">OU426915.1</a></td></tr><tr><td><input checked="" type="checkbox"/></td><td><a href="#">PREDICTED: Spodoptera litura insulin-like receptor (LOC111353383), transcript variant X2, mRNA</a></td><td><a href="#">Spodoptera litura</a></td><td>2760</td><td>4479</td><td>75%</td><td>0.0</td><td>77.98%</td><td>7651</td><td><a href="#">XM_022966388.1</a></td></tr><tr><td><input checked="" type="checkbox"/></td><td><a href="#">Cosmia pyralina genome assembly chromosome_2</a></td><td><a href="#">Cosmia pyralina</a></td><td>2706</td><td>6096</td><td>62%</td><td>0.0</td><td>84.78%</td><td>31425840</td><td><a href="#">OX276343.1</a></td></tr><tr><td><input checked="" type="checkbox"/></td><td><a href="#">Hydraecia micacea genome assembly chromosome_1</a></td><td><a href="#">Hydraecia mica...</a></td><td>2684</td><td>6386</td><td>63%</td><td>0.0</td><td>84.86%</td><td>21980877</td><td><a href="#">OU611776.1</a></td></tr><tr><td><input checked="" type="checkbox"/></td><td><a href="#">PREDICTED: Helicoverpa armigera insulin-like receptor (LOC110377777), transcript variant X2, mRNA</a></td><td><a href="#">Helicoverpa ar...</a></td><td>2588</td><td>2772</td><td>52%</td><td>0.0</td><td>77.75%</td><td>4544</td><td><a href="#">XM_049835940.1</a></td></tr><tr><td><input checked="" type="checkbox"/></td><td><a href="#">Brachyolmia viminalis genome assembly chromosome_2</a></td><td><a href="#">Brachyolmia vi...</a></td><td>2529</td><td>6330</td><td>63%</td><td>0.0</td><td>83.81%</td><td>29842023</td><td><a href="#">OJ443295.2</a></td></tr><tr><td><input checked="" type="checkbox"/></td><td><a href="#">PREDICTED: Helicoverpa zea insulin-like receptor (LOC124634694), transcript variant X2, mRNA</a></td><td><a href="#">Helicoverpa zea</a></td><td>2418</td><td>5194</td><td>79%</td><td>0.0</td><td>77.82%</td><td>7694</td><td><a href="#">XM_047170361.1</a></td></tr></table> |                                    | Description | Scientific Name | Max Score   | Total Score | Query Cover | E value  | Per Ident                      | Acc. Len | Accession | <input checked="" type="checkbox"/> | <a href="#">Mythimna albipuncta genome assembly chromosome_1</a> | <a href="#">Mythimna albi...</a> | 4863 | 10709 | 89% | 0.0 | 91.37% | 34473587 | <a href="#">OJ815959.1</a> | <input checked="" type="checkbox"/> | <a href="#">Mythimna impura genome assembly chromosome_1</a> | <a href="#">Mythimna impura</a> | 4732 | 12316 | 89% | 0.0 | 90.93% | 36229551 | <a href="#">LR990340.1</a> | <input checked="" type="checkbox"/> | <a href="#">Mamestra brassicae genome assembly chromosome_1</a> | <a href="#">Mamestra bras...</a> | 4008 | 8256 | 74% | 0.0 | 89.04% | 23412814 | <a href="#">LR990988.1</a> | <input checked="" type="checkbox"/> | <a href="#">Amphipoea oclea genome assembly chromosome_1</a> | <a href="#">Amphipoea ocl...</a> | 3546 | 6184 | 61% | 0.0 | 86.62% | 26428330 | <a href="#">OX243862.1</a> | <input checked="" type="checkbox"/> | <a href="#">Melanchra persicariae genome assembly chromosome_1</a> | <a href="#">Melanchra persi...</a> | 3518 | 9168 | 80% | 0.0 | 86.49% | 25931581 | <a href="#">OX376644.1</a> | <input checked="" type="checkbox"/> | <a href="#">PREDICTED: Helicoverpa zea insulin-like receptor (LOC124634694), transcript variant X1, mRNA</a> | <a href="#">Helicoverpa zea</a> | 2915 | 5691 | 85% | 0.0 | 78.47% | 8117 | <a href="#">XM_047170356.1</a> | <input checked="" type="checkbox"/> | <a href="#">PREDICTED: Helicoverpa armigera insulin-like receptor (LOC110377777), transcript variant X1, mRNA</a> | <a href="#">Helicoverpa ar...</a> | 2881 | 5684 | 85% | 0.0 | 78.33% | 8128 | <a href="#">XM_049835939.1</a> | <input checked="" type="checkbox"/> | <a href="#">Amphipoea lucens genome assembly chromosome_1</a> | <a href="#">Amphipoea luc...</a> | 2861 | 6385 | 61% | 0.0 | 85.94% | 25775902 | <a href="#">OX382356.1</a> | <input checked="" type="checkbox"/> | <a href="#">Apamea monolypha genome assembly chromosome_1</a> | <a href="#">Apamea monog...</a> | 2844 | 6621 | 63% | 0.0 | 85.78% | 22418240 | <a href="#">OU426915.1</a> | <input checked="" type="checkbox"/> | <a href="#">PREDICTED: Spodoptera litura insulin-like receptor (LOC111353383), transcript variant X2, mRNA</a> | <a href="#">Spodoptera litura</a> | 2760 | 4479 | 75% | 0.0 | 77.98% | 7651 | <a href="#">XM_022966388.1</a> | <input checked="" type="checkbox"/> | <a href="#">Cosmia pyralina genome assembly chromosome_2</a> | <a href="#">Cosmia pyralina</a> | 2706 | 6096 | 62% | 0.0 | 84.78% | 31425840 | <a href="#">OX276343.1</a> | <input checked="" type="checkbox"/> | <a href="#">Hydraecia micacea genome assembly chromosome_1</a> | <a href="#">Hydraecia mica...</a> | 2684 | 6386 | 63% | 0.0 | 84.86% | 21980877 | <a href="#">OU611776.1</a> | <input checked="" type="checkbox"/> | <a href="#">PREDICTED: Helicoverpa armigera insulin-like receptor (LOC110377777), transcript variant X2, mRNA</a> | <a href="#">Helicoverpa ar...</a> | 2588 | 2772 | 52% | 0.0 | 77.75% | 4544 | <a href="#">XM_049835940.1</a> | <input checked="" type="checkbox"/> | <a href="#">Brachyolmia viminalis genome assembly chromosome_2</a> | <a href="#">Brachyolmia vi...</a> | 2529 | 6330 | 63% | 0.0 | 83.81% | 29842023 | <a href="#">OJ443295.2</a> | <input checked="" type="checkbox"/> | <a href="#">PREDICTED: Helicoverpa zea insulin-like receptor (LOC124634694), transcript variant X2, mRNA</a> | <a href="#">Helicoverpa zea</a> | 2418 | 5194 | 79% | 0.0 | 77.82% | 7694 | <a href="#">XM_047170361.1</a> |
|                                             | Description                                                                                                                                                                                                                                                                                                                                                                                                                                                                                                                                                                                                                                                                                                                                                                                                                                                                                                                                                                                                                                                                                                                                                                                                                                                                                                                                                                                                                                                                                                                                                                                                                                                                                                                                                                                                                                                                                                                                                                                                                                                                                                                                                                                                                                                                                                                                                                                                                                                                                                                                                                                                                                                                                                                                                                                                                                                                                                                                                                                                                                                                                                                                                                                                                                                                                                                                                                                                                                                                                                                                                                                                                                                                                                                                                                                                                                                                                                                                                                                                                                                                                                                                                                                                                                                                                                                                                                                                                                                                                                                                                                                                                                                                                                                                                                                                                                                                 | Scientific Name                    | Max Score   | Total Score     | Query Cover | E value     | Per Ident   | Acc. Len | Accession                      |          |           |                                     |                                                                  |                                  |      |       |     |     |        |          |                            |                                     |                                                              |                                 |      |       |     |     |        |          |                            |                                     |                                                                 |                                  |      |      |     |     |        |          |                            |                                     |                                                              |                                  |      |      |     |     |        |          |                            |                                     |                                                                    |                                    |      |      |     |     |        |          |                            |                                     |                                                                                                              |                                 |      |      |     |     |        |      |                                |                                     |                                                                                                                   |                                   |      |      |     |     |        |      |                                |                                     |                                                               |                                  |      |      |     |     |        |          |                            |                                     |                                                               |                                 |      |      |     |     |        |          |                            |                                     |                                                                                                                |                                   |      |      |     |     |        |      |                                |                                     |                                                              |                                 |      |      |     |     |        |          |                            |                                     |                                                                |                                   |      |      |     |     |        |          |                            |                                     |                                                                                                                   |                                   |      |      |     |     |        |      |                                |                                     |                                                                    |                                   |      |      |     |     |        |          |                            |                                     |                                                                                                              |                                 |      |      |     |     |        |      |                                |
| <input checked="" type="checkbox"/>         | <a href="#">Mythimna albipuncta genome assembly chromosome_1</a>                                                                                                                                                                                                                                                                                                                                                                                                                                                                                                                                                                                                                                                                                                                                                                                                                                                                                                                                                                                                                                                                                                                                                                                                                                                                                                                                                                                                                                                                                                                                                                                                                                                                                                                                                                                                                                                                                                                                                                                                                                                                                                                                                                                                                                                                                                                                                                                                                                                                                                                                                                                                                                                                                                                                                                                                                                                                                                                                                                                                                                                                                                                                                                                                                                                                                                                                                                                                                                                                                                                                                                                                                                                                                                                                                                                                                                                                                                                                                                                                                                                                                                                                                                                                                                                                                                                                                                                                                                                                                                                                                                                                                                                                                                                                                                                                            | <a href="#">Mythimna albi...</a>   | 4863        | 10709           | 89%         | 0.0         | 91.37%      | 34473587 | <a href="#">OJ815959.1</a>     |          |           |                                     |                                                                  |                                  |      |       |     |     |        |          |                            |                                     |                                                              |                                 |      |       |     |     |        |          |                            |                                     |                                                                 |                                  |      |      |     |     |        |          |                            |                                     |                                                              |                                  |      |      |     |     |        |          |                            |                                     |                                                                    |                                    |      |      |     |     |        |          |                            |                                     |                                                                                                              |                                 |      |      |     |     |        |      |                                |                                     |                                                                                                                   |                                   |      |      |     |     |        |      |                                |                                     |                                                               |                                  |      |      |     |     |        |          |                            |                                     |                                                               |                                 |      |      |     |     |        |          |                            |                                     |                                                                                                                |                                   |      |      |     |     |        |      |                                |                                     |                                                              |                                 |      |      |     |     |        |          |                            |                                     |                                                                |                                   |      |      |     |     |        |          |                            |                                     |                                                                                                                   |                                   |      |      |     |     |        |      |                                |                                     |                                                                    |                                   |      |      |     |     |        |          |                            |                                     |                                                                                                              |                                 |      |      |     |     |        |      |                                |
| <input checked="" type="checkbox"/>         | <a href="#">Mythimna impura genome assembly chromosome_1</a>                                                                                                                                                                                                                                                                                                                                                                                                                                                                                                                                                                                                                                                                                                                                                                                                                                                                                                                                                                                                                                                                                                                                                                                                                                                                                                                                                                                                                                                                                                                                                                                                                                                                                                                                                                                                                                                                                                                                                                                                                                                                                                                                                                                                                                                                                                                                                                                                                                                                                                                                                                                                                                                                                                                                                                                                                                                                                                                                                                                                                                                                                                                                                                                                                                                                                                                                                                                                                                                                                                                                                                                                                                                                                                                                                                                                                                                                                                                                                                                                                                                                                                                                                                                                                                                                                                                                                                                                                                                                                                                                                                                                                                                                                                                                                                                                                | <a href="#">Mythimna impura</a>    | 4732        | 12316           | 89%         | 0.0         | 90.93%      | 36229551 | <a href="#">LR990340.1</a>     |          |           |                                     |                                                                  |                                  |      |       |     |     |        |          |                            |                                     |                                                              |                                 |      |       |     |     |        |          |                            |                                     |                                                                 |                                  |      |      |     |     |        |          |                            |                                     |                                                              |                                  |      |      |     |     |        |          |                            |                                     |                                                                    |                                    |      |      |     |     |        |          |                            |                                     |                                                                                                              |                                 |      |      |     |     |        |      |                                |                                     |                                                                                                                   |                                   |      |      |     |     |        |      |                                |                                     |                                                               |                                  |      |      |     |     |        |          |                            |                                     |                                                               |                                 |      |      |     |     |        |          |                            |                                     |                                                                                                                |                                   |      |      |     |     |        |      |                                |                                     |                                                              |                                 |      |      |     |     |        |          |                            |                                     |                                                                |                                   |      |      |     |     |        |          |                            |                                     |                                                                                                                   |                                   |      |      |     |     |        |      |                                |                                     |                                                                    |                                   |      |      |     |     |        |          |                            |                                     |                                                                                                              |                                 |      |      |     |     |        |      |                                |
| <input checked="" type="checkbox"/>         | <a href="#">Mamestra brassicae genome assembly chromosome_1</a>                                                                                                                                                                                                                                                                                                                                                                                                                                                                                                                                                                                                                                                                                                                                                                                                                                                                                                                                                                                                                                                                                                                                                                                                                                                                                                                                                                                                                                                                                                                                                                                                                                                                                                                                                                                                                                                                                                                                                                                                                                                                                                                                                                                                                                                                                                                                                                                                                                                                                                                                                                                                                                                                                                                                                                                                                                                                                                                                                                                                                                                                                                                                                                                                                                                                                                                                                                                                                                                                                                                                                                                                                                                                                                                                                                                                                                                                                                                                                                                                                                                                                                                                                                                                                                                                                                                                                                                                                                                                                                                                                                                                                                                                                                                                                                                                             | <a href="#">Mamestra bras...</a>   | 4008        | 8256            | 74%         | 0.0         | 89.04%      | 23412814 | <a href="#">LR990988.1</a>     |          |           |                                     |                                                                  |                                  |      |       |     |     |        |          |                            |                                     |                                                              |                                 |      |       |     |     |        |          |                            |                                     |                                                                 |                                  |      |      |     |     |        |          |                            |                                     |                                                              |                                  |      |      |     |     |        |          |                            |                                     |                                                                    |                                    |      |      |     |     |        |          |                            |                                     |                                                                                                              |                                 |      |      |     |     |        |      |                                |                                     |                                                                                                                   |                                   |      |      |     |     |        |      |                                |                                     |                                                               |                                  |      |      |     |     |        |          |                            |                                     |                                                               |                                 |      |      |     |     |        |          |                            |                                     |                                                                                                                |                                   |      |      |     |     |        |      |                                |                                     |                                                              |                                 |      |      |     |     |        |          |                            |                                     |                                                                |                                   |      |      |     |     |        |          |                            |                                     |                                                                                                                   |                                   |      |      |     |     |        |      |                                |                                     |                                                                    |                                   |      |      |     |     |        |          |                            |                                     |                                                                                                              |                                 |      |      |     |     |        |      |                                |
| <input checked="" type="checkbox"/>         | <a href="#">Amphipoea oclea genome assembly chromosome_1</a>                                                                                                                                                                                                                                                                                                                                                                                                                                                                                                                                                                                                                                                                                                                                                                                                                                                                                                                                                                                                                                                                                                                                                                                                                                                                                                                                                                                                                                                                                                                                                                                                                                                                                                                                                                                                                                                                                                                                                                                                                                                                                                                                                                                                                                                                                                                                                                                                                                                                                                                                                                                                                                                                                                                                                                                                                                                                                                                                                                                                                                                                                                                                                                                                                                                                                                                                                                                                                                                                                                                                                                                                                                                                                                                                                                                                                                                                                                                                                                                                                                                                                                                                                                                                                                                                                                                                                                                                                                                                                                                                                                                                                                                                                                                                                                                                                | <a href="#">Amphipoea ocl...</a>   | 3546        | 6184            | 61%         | 0.0         | 86.62%      | 26428330 | <a href="#">OX243862.1</a>     |          |           |                                     |                                                                  |                                  |      |       |     |     |        |          |                            |                                     |                                                              |                                 |      |       |     |     |        |          |                            |                                     |                                                                 |                                  |      |      |     |     |        |          |                            |                                     |                                                              |                                  |      |      |     |     |        |          |                            |                                     |                                                                    |                                    |      |      |     |     |        |          |                            |                                     |                                                                                                              |                                 |      |      |     |     |        |      |                                |                                     |                                                                                                                   |                                   |      |      |     |     |        |      |                                |                                     |                                                               |                                  |      |      |     |     |        |          |                            |                                     |                                                               |                                 |      |      |     |     |        |          |                            |                                     |                                                                                                                |                                   |      |      |     |     |        |      |                                |                                     |                                                              |                                 |      |      |     |     |        |          |                            |                                     |                                                                |                                   |      |      |     |     |        |          |                            |                                     |                                                                                                                   |                                   |      |      |     |     |        |      |                                |                                     |                                                                    |                                   |      |      |     |     |        |          |                            |                                     |                                                                                                              |                                 |      |      |     |     |        |      |                                |
| <input checked="" type="checkbox"/>         | <a href="#">Melanchra persicariae genome assembly chromosome_1</a>                                                                                                                                                                                                                                                                                                                                                                                                                                                                                                                                                                                                                                                                                                                                                                                                                                                                                                                                                                                                                                                                                                                                                                                                                                                                                                                                                                                                                                                                                                                                                                                                                                                                                                                                                                                                                                                                                                                                                                                                                                                                                                                                                                                                                                                                                                                                                                                                                                                                                                                                                                                                                                                                                                                                                                                                                                                                                                                                                                                                                                                                                                                                                                                                                                                                                                                                                                                                                                                                                                                                                                                                                                                                                                                                                                                                                                                                                                                                                                                                                                                                                                                                                                                                                                                                                                                                                                                                                                                                                                                                                                                                                                                                                                                                                                                                          | <a href="#">Melanchra persi...</a> | 3518        | 9168            | 80%         | 0.0         | 86.49%      | 25931581 | <a href="#">OX376644.1</a>     |          |           |                                     |                                                                  |                                  |      |       |     |     |        |          |                            |                                     |                                                              |                                 |      |       |     |     |        |          |                            |                                     |                                                                 |                                  |      |      |     |     |        |          |                            |                                     |                                                              |                                  |      |      |     |     |        |          |                            |                                     |                                                                    |                                    |      |      |     |     |        |          |                            |                                     |                                                                                                              |                                 |      |      |     |     |        |      |                                |                                     |                                                                                                                   |                                   |      |      |     |     |        |      |                                |                                     |                                                               |                                  |      |      |     |     |        |          |                            |                                     |                                                               |                                 |      |      |     |     |        |          |                            |                                     |                                                                                                                |                                   |      |      |     |     |        |      |                                |                                     |                                                              |                                 |      |      |     |     |        |          |                            |                                     |                                                                |                                   |      |      |     |     |        |          |                            |                                     |                                                                                                                   |                                   |      |      |     |     |        |      |                                |                                     |                                                                    |                                   |      |      |     |     |        |          |                            |                                     |                                                                                                              |                                 |      |      |     |     |        |      |                                |
| <input checked="" type="checkbox"/>         | <a href="#">PREDICTED: Helicoverpa zea insulin-like receptor (LOC124634694), transcript variant X1, mRNA</a>                                                                                                                                                                                                                                                                                                                                                                                                                                                                                                                                                                                                                                                                                                                                                                                                                                                                                                                                                                                                                                                                                                                                                                                                                                                                                                                                                                                                                                                                                                                                                                                                                                                                                                                                                                                                                                                                                                                                                                                                                                                                                                                                                                                                                                                                                                                                                                                                                                                                                                                                                                                                                                                                                                                                                                                                                                                                                                                                                                                                                                                                                                                                                                                                                                                                                                                                                                                                                                                                                                                                                                                                                                                                                                                                                                                                                                                                                                                                                                                                                                                                                                                                                                                                                                                                                                                                                                                                                                                                                                                                                                                                                                                                                                                                                                | <a href="#">Helicoverpa zea</a>    | 2915        | 5691            | 85%         | 0.0         | 78.47%      | 8117     | <a href="#">XM_047170356.1</a> |          |           |                                     |                                                                  |                                  |      |       |     |     |        |          |                            |                                     |                                                              |                                 |      |       |     |     |        |          |                            |                                     |                                                                 |                                  |      |      |     |     |        |          |                            |                                     |                                                              |                                  |      |      |     |     |        |          |                            |                                     |                                                                    |                                    |      |      |     |     |        |          |                            |                                     |                                                                                                              |                                 |      |      |     |     |        |      |                                |                                     |                                                                                                                   |                                   |      |      |     |     |        |      |                                |                                     |                                                               |                                  |      |      |     |     |        |          |                            |                                     |                                                               |                                 |      |      |     |     |        |          |                            |                                     |                                                                                                                |                                   |      |      |     |     |        |      |                                |                                     |                                                              |                                 |      |      |     |     |        |          |                            |                                     |                                                                |                                   |      |      |     |     |        |          |                            |                                     |                                                                                                                   |                                   |      |      |     |     |        |      |                                |                                     |                                                                    |                                   |      |      |     |     |        |          |                            |                                     |                                                                                                              |                                 |      |      |     |     |        |      |                                |
| <input checked="" type="checkbox"/>         | <a href="#">PREDICTED: Helicoverpa armigera insulin-like receptor (LOC110377777), transcript variant X1, mRNA</a>                                                                                                                                                                                                                                                                                                                                                                                                                                                                                                                                                                                                                                                                                                                                                                                                                                                                                                                                                                                                                                                                                                                                                                                                                                                                                                                                                                                                                                                                                                                                                                                                                                                                                                                                                                                                                                                                                                                                                                                                                                                                                                                                                                                                                                                                                                                                                                                                                                                                                                                                                                                                                                                                                                                                                                                                                                                                                                                                                                                                                                                                                                                                                                                                                                                                                                                                                                                                                                                                                                                                                                                                                                                                                                                                                                                                                                                                                                                                                                                                                                                                                                                                                                                                                                                                                                                                                                                                                                                                                                                                                                                                                                                                                                                                                           | <a href="#">Helicoverpa ar...</a>  | 2881        | 5684            | 85%         | 0.0         | 78.33%      | 8128     | <a href="#">XM_049835939.1</a> |          |           |                                     |                                                                  |                                  |      |       |     |     |        |          |                            |                                     |                                                              |                                 |      |       |     |     |        |          |                            |                                     |                                                                 |                                  |      |      |     |     |        |          |                            |                                     |                                                              |                                  |      |      |     |     |        |          |                            |                                     |                                                                    |                                    |      |      |     |     |        |          |                            |                                     |                                                                                                              |                                 |      |      |     |     |        |      |                                |                                     |                                                                                                                   |                                   |      |      |     |     |        |      |                                |                                     |                                                               |                                  |      |      |     |     |        |          |                            |                                     |                                                               |                                 |      |      |     |     |        |          |                            |                                     |                                                                                                                |                                   |      |      |     |     |        |      |                                |                                     |                                                              |                                 |      |      |     |     |        |          |                            |                                     |                                                                |                                   |      |      |     |     |        |          |                            |                                     |                                                                                                                   |                                   |      |      |     |     |        |      |                                |                                     |                                                                    |                                   |      |      |     |     |        |          |                            |                                     |                                                                                                              |                                 |      |      |     |     |        |      |                                |
| <input checked="" type="checkbox"/>         | <a href="#">Amphipoea lucens genome assembly chromosome_1</a>                                                                                                                                                                                                                                                                                                                                                                                                                                                                                                                                                                                                                                                                                                                                                                                                                                                                                                                                                                                                                                                                                                                                                                                                                                                                                                                                                                                                                                                                                                                                                                                                                                                                                                                                                                                                                                                                                                                                                                                                                                                                                                                                                                                                                                                                                                                                                                                                                                                                                                                                                                                                                                                                                                                                                                                                                                                                                                                                                                                                                                                                                                                                                                                                                                                                                                                                                                                                                                                                                                                                                                                                                                                                                                                                                                                                                                                                                                                                                                                                                                                                                                                                                                                                                                                                                                                                                                                                                                                                                                                                                                                                                                                                                                                                                                                                               | <a href="#">Amphipoea luc...</a>   | 2861        | 6385            | 61%         | 0.0         | 85.94%      | 25775902 | <a href="#">OX382356.1</a>     |          |           |                                     |                                                                  |                                  |      |       |     |     |        |          |                            |                                     |                                                              |                                 |      |       |     |     |        |          |                            |                                     |                                                                 |                                  |      |      |     |     |        |          |                            |                                     |                                                              |                                  |      |      |     |     |        |          |                            |                                     |                                                                    |                                    |      |      |     |     |        |          |                            |                                     |                                                                                                              |                                 |      |      |     |     |        |      |                                |                                     |                                                                                                                   |                                   |      |      |     |     |        |      |                                |                                     |                                                               |                                  |      |      |     |     |        |          |                            |                                     |                                                               |                                 |      |      |     |     |        |          |                            |                                     |                                                                                                                |                                   |      |      |     |     |        |      |                                |                                     |                                                              |                                 |      |      |     |     |        |          |                            |                                     |                                                                |                                   |      |      |     |     |        |          |                            |                                     |                                                                                                                   |                                   |      |      |     |     |        |      |                                |                                     |                                                                    |                                   |      |      |     |     |        |          |                            |                                     |                                                                                                              |                                 |      |      |     |     |        |      |                                |
| <input checked="" type="checkbox"/>         | <a href="#">Apamea monolypha genome assembly chromosome_1</a>                                                                                                                                                                                                                                                                                                                                                                                                                                                                                                                                                                                                                                                                                                                                                                                                                                                                                                                                                                                                                                                                                                                                                                                                                                                                                                                                                                                                                                                                                                                                                                                                                                                                                                                                                                                                                                                                                                                                                                                                                                                                                                                                                                                                                                                                                                                                                                                                                                                                                                                                                                                                                                                                                                                                                                                                                                                                                                                                                                                                                                                                                                                                                                                                                                                                                                                                                                                                                                                                                                                                                                                                                                                                                                                                                                                                                                                                                                                                                                                                                                                                                                                                                                                                                                                                                                                                                                                                                                                                                                                                                                                                                                                                                                                                                                                                               | <a href="#">Apamea monog...</a>    | 2844        | 6621            | 63%         | 0.0         | 85.78%      | 22418240 | <a href="#">OU426915.1</a>     |          |           |                                     |                                                                  |                                  |      |       |     |     |        |          |                            |                                     |                                                              |                                 |      |       |     |     |        |          |                            |                                     |                                                                 |                                  |      |      |     |     |        |          |                            |                                     |                                                              |                                  |      |      |     |     |        |          |                            |                                     |                                                                    |                                    |      |      |     |     |        |          |                            |                                     |                                                                                                              |                                 |      |      |     |     |        |      |                                |                                     |                                                                                                                   |                                   |      |      |     |     |        |      |                                |                                     |                                                               |                                  |      |      |     |     |        |          |                            |                                     |                                                               |                                 |      |      |     |     |        |          |                            |                                     |                                                                                                                |                                   |      |      |     |     |        |      |                                |                                     |                                                              |                                 |      |      |     |     |        |          |                            |                                     |                                                                |                                   |      |      |     |     |        |          |                            |                                     |                                                                                                                   |                                   |      |      |     |     |        |      |                                |                                     |                                                                    |                                   |      |      |     |     |        |          |                            |                                     |                                                                                                              |                                 |      |      |     |     |        |      |                                |
| <input checked="" type="checkbox"/>         | <a href="#">PREDICTED: Spodoptera litura insulin-like receptor (LOC111353383), transcript variant X2, mRNA</a>                                                                                                                                                                                                                                                                                                                                                                                                                                                                                                                                                                                                                                                                                                                                                                                                                                                                                                                                                                                                                                                                                                                                                                                                                                                                                                                                                                                                                                                                                                                                                                                                                                                                                                                                                                                                                                                                                                                                                                                                                                                                                                                                                                                                                                                                                                                                                                                                                                                                                                                                                                                                                                                                                                                                                                                                                                                                                                                                                                                                                                                                                                                                                                                                                                                                                                                                                                                                                                                                                                                                                                                                                                                                                                                                                                                                                                                                                                                                                                                                                                                                                                                                                                                                                                                                                                                                                                                                                                                                                                                                                                                                                                                                                                                                                              | <a href="#">Spodoptera litura</a>  | 2760        | 4479            | 75%         | 0.0         | 77.98%      | 7651     | <a href="#">XM_022966388.1</a> |          |           |                                     |                                                                  |                                  |      |       |     |     |        |          |                            |                                     |                                                              |                                 |      |       |     |     |        |          |                            |                                     |                                                                 |                                  |      |      |     |     |        |          |                            |                                     |                                                              |                                  |      |      |     |     |        |          |                            |                                     |                                                                    |                                    |      |      |     |     |        |          |                            |                                     |                                                                                                              |                                 |      |      |     |     |        |      |                                |                                     |                                                                                                                   |                                   |      |      |     |     |        |      |                                |                                     |                                                               |                                  |      |      |     |     |        |          |                            |                                     |                                                               |                                 |      |      |     |     |        |          |                            |                                     |                                                                                                                |                                   |      |      |     |     |        |      |                                |                                     |                                                              |                                 |      |      |     |     |        |          |                            |                                     |                                                                |                                   |      |      |     |     |        |          |                            |                                     |                                                                                                                   |                                   |      |      |     |     |        |      |                                |                                     |                                                                    |                                   |      |      |     |     |        |          |                            |                                     |                                                                                                              |                                 |      |      |     |     |        |      |                                |
| <input checked="" type="checkbox"/>         | <a href="#">Cosmia pyralina genome assembly chromosome_2</a>                                                                                                                                                                                                                                                                                                                                                                                                                                                                                                                                                                                                                                                                                                                                                                                                                                                                                                                                                                                                                                                                                                                                                                                                                                                                                                                                                                                                                                                                                                                                                                                                                                                                                                                                                                                                                                                                                                                                                                                                                                                                                                                                                                                                                                                                                                                                                                                                                                                                                                                                                                                                                                                                                                                                                                                                                                                                                                                                                                                                                                                                                                                                                                                                                                                                                                                                                                                                                                                                                                                                                                                                                                                                                                                                                                                                                                                                                                                                                                                                                                                                                                                                                                                                                                                                                                                                                                                                                                                                                                                                                                                                                                                                                                                                                                                                                | <a href="#">Cosmia pyralina</a>    | 2706        | 6096            | 62%         | 0.0         | 84.78%      | 31425840 | <a href="#">OX276343.1</a>     |          |           |                                     |                                                                  |                                  |      |       |     |     |        |          |                            |                                     |                                                              |                                 |      |       |     |     |        |          |                            |                                     |                                                                 |                                  |      |      |     |     |        |          |                            |                                     |                                                              |                                  |      |      |     |     |        |          |                            |                                     |                                                                    |                                    |      |      |     |     |        |          |                            |                                     |                                                                                                              |                                 |      |      |     |     |        |      |                                |                                     |                                                                                                                   |                                   |      |      |     |     |        |      |                                |                                     |                                                               |                                  |      |      |     |     |        |          |                            |                                     |                                                               |                                 |      |      |     |     |        |          |                            |                                     |                                                                                                                |                                   |      |      |     |     |        |      |                                |                                     |                                                              |                                 |      |      |     |     |        |          |                            |                                     |                                                                |                                   |      |      |     |     |        |          |                            |                                     |                                                                                                                   |                                   |      |      |     |     |        |      |                                |                                     |                                                                    |                                   |      |      |     |     |        |          |                            |                                     |                                                                                                              |                                 |      |      |     |     |        |      |                                |
| <input checked="" type="checkbox"/>         | <a href="#">Hydraecia micacea genome assembly chromosome_1</a>                                                                                                                                                                                                                                                                                                                                                                                                                                                                                                                                                                                                                                                                                                                                                                                                                                                                                                                                                                                                                                                                                                                                                                                                                                                                                                                                                                                                                                                                                                                                                                                                                                                                                                                                                                                                                                                                                                                                                                                                                                                                                                                                                                                                                                                                                                                                                                                                                                                                                                                                                                                                                                                                                                                                                                                                                                                                                                                                                                                                                                                                                                                                                                                                                                                                                                                                                                                                                                                                                                                                                                                                                                                                                                                                                                                                                                                                                                                                                                                                                                                                                                                                                                                                                                                                                                                                                                                                                                                                                                                                                                                                                                                                                                                                                                                                              | <a href="#">Hydraecia mica...</a>  | 2684        | 6386            | 63%         | 0.0         | 84.86%      | 21980877 | <a href="#">OU611776.1</a>     |          |           |                                     |                                                                  |                                  |      |       |     |     |        |          |                            |                                     |                                                              |                                 |      |       |     |     |        |          |                            |                                     |                                                                 |                                  |      |      |     |     |        |          |                            |                                     |                                                              |                                  |      |      |     |     |        |          |                            |                                     |                                                                    |                                    |      |      |     |     |        |          |                            |                                     |                                                                                                              |                                 |      |      |     |     |        |      |                                |                                     |                                                                                                                   |                                   |      |      |     |     |        |      |                                |                                     |                                                               |                                  |      |      |     |     |        |          |                            |                                     |                                                               |                                 |      |      |     |     |        |          |                            |                                     |                                                                                                                |                                   |      |      |     |     |        |      |                                |                                     |                                                              |                                 |      |      |     |     |        |          |                            |                                     |                                                                |                                   |      |      |     |     |        |          |                            |                                     |                                                                                                                   |                                   |      |      |     |     |        |      |                                |                                     |                                                                    |                                   |      |      |     |     |        |          |                            |                                     |                                                                                                              |                                 |      |      |     |     |        |      |                                |
| <input checked="" type="checkbox"/>         | <a href="#">PREDICTED: Helicoverpa armigera insulin-like receptor (LOC110377777), transcript variant X2, mRNA</a>                                                                                                                                                                                                                                                                                                                                                                                                                                                                                                                                                                                                                                                                                                                                                                                                                                                                                                                                                                                                                                                                                                                                                                                                                                                                                                                                                                                                                                                                                                                                                                                                                                                                                                                                                                                                                                                                                                                                                                                                                                                                                                                                                                                                                                                                                                                                                                                                                                                                                                                                                                                                                                                                                                                                                                                                                                                                                                                                                                                                                                                                                                                                                                                                                                                                                                                                                                                                                                                                                                                                                                                                                                                                                                                                                                                                                                                                                                                                                                                                                                                                                                                                                                                                                                                                                                                                                                                                                                                                                                                                                                                                                                                                                                                                                           | <a href="#">Helicoverpa ar...</a>  | 2588        | 2772            | 52%         | 0.0         | 77.75%      | 4544     | <a href="#">XM_049835940.1</a> |          |           |                                     |                                                                  |                                  |      |       |     |     |        |          |                            |                                     |                                                              |                                 |      |       |     |     |        |          |                            |                                     |                                                                 |                                  |      |      |     |     |        |          |                            |                                     |                                                              |                                  |      |      |     |     |        |          |                            |                                     |                                                                    |                                    |      |      |     |     |        |          |                            |                                     |                                                                                                              |                                 |      |      |     |     |        |      |                                |                                     |                                                                                                                   |                                   |      |      |     |     |        |      |                                |                                     |                                                               |                                  |      |      |     |     |        |          |                            |                                     |                                                               |                                 |      |      |     |     |        |          |                            |                                     |                                                                                                                |                                   |      |      |     |     |        |      |                                |                                     |                                                              |                                 |      |      |     |     |        |          |                            |                                     |                                                                |                                   |      |      |     |     |        |          |                            |                                     |                                                                                                                   |                                   |      |      |     |     |        |      |                                |                                     |                                                                    |                                   |      |      |     |     |        |          |                            |                                     |                                                                                                              |                                 |      |      |     |     |        |      |                                |
| <input checked="" type="checkbox"/>         | <a href="#">Brachyolmia viminalis genome assembly chromosome_2</a>                                                                                                                                                                                                                                                                                                                                                                                                                                                                                                                                                                                                                                                                                                                                                                                                                                                                                                                                                                                                                                                                                                                                                                                                                                                                                                                                                                                                                                                                                                                                                                                                                                                                                                                                                                                                                                                                                                                                                                                                                                                                                                                                                                                                                                                                                                                                                                                                                                                                                                                                                                                                                                                                                                                                                                                                                                                                                                                                                                                                                                                                                                                                                                                                                                                                                                                                                                                                                                                                                                                                                                                                                                                                                                                                                                                                                                                                                                                                                                                                                                                                                                                                                                                                                                                                                                                                                                                                                                                                                                                                                                                                                                                                                                                                                                                                          | <a href="#">Brachyolmia vi...</a>  | 2529        | 6330            | 63%         | 0.0         | 83.81%      | 29842023 | <a href="#">OJ443295.2</a>     |          |           |                                     |                                                                  |                                  |      |       |     |     |        |          |                            |                                     |                                                              |                                 |      |       |     |     |        |          |                            |                                     |                                                                 |                                  |      |      |     |     |        |          |                            |                                     |                                                              |                                  |      |      |     |     |        |          |                            |                                     |                                                                    |                                    |      |      |     |     |        |          |                            |                                     |                                                                                                              |                                 |      |      |     |     |        |      |                                |                                     |                                                                                                                   |                                   |      |      |     |     |        |      |                                |                                     |                                                               |                                  |      |      |     |     |        |          |                            |                                     |                                                               |                                 |      |      |     |     |        |          |                            |                                     |                                                                                                                |                                   |      |      |     |     |        |      |                                |                                     |                                                              |                                 |      |      |     |     |        |          |                            |                                     |                                                                |                                   |      |      |     |     |        |          |                            |                                     |                                                                                                                   |                                   |      |      |     |     |        |      |                                |                                     |                                                                    |                                   |      |      |     |     |        |          |                            |                                     |                                                                                                              |                                 |      |      |     |     |        |      |                                |
| <input checked="" type="checkbox"/>         | <a href="#">PREDICTED: Helicoverpa zea insulin-like receptor (LOC124634694), transcript variant X2, mRNA</a>                                                                                                                                                                                                                                                                                                                                                                                                                                                                                                                                                                                                                                                                                                                                                                                                                                                                                                                                                                                                                                                                                                                                                                                                                                                                                                                                                                                                                                                                                                                                                                                                                                                                                                                                                                                                                                                                                                                                                                                                                                                                                                                                                                                                                                                                                                                                                                                                                                                                                                                                                                                                                                                                                                                                                                                                                                                                                                                                                                                                                                                                                                                                                                                                                                                                                                                                                                                                                                                                                                                                                                                                                                                                                                                                                                                                                                                                                                                                                                                                                                                                                                                                                                                                                                                                                                                                                                                                                                                                                                                                                                                                                                                                                                                                                                | <a href="#">Helicoverpa zea</a>    | 2418        | 5194            | 79%         | 0.0         | 77.82%      | 7694     | <a href="#">XM_047170361.1</a> |          |           |                                     |                                                                  |                                  |      |       |     |     |        |          |                            |                                     |                                                              |                                 |      |       |     |     |        |          |                            |                                     |                                                                 |                                  |      |      |     |     |        |          |                            |                                     |                                                              |                                  |      |      |     |     |        |          |                            |                                     |                                                                    |                                    |      |      |     |     |        |          |                            |                                     |                                                                                                              |                                 |      |      |     |     |        |      |                                |                                     |                                                                                                                   |                                   |      |      |     |     |        |      |                                |                                     |                                                               |                                  |      |      |     |     |        |          |                            |                                     |                                                               |                                 |      |      |     |     |        |          |                            |                                     |                                                                                                                |                                   |      |      |     |     |        |      |                                |                                     |                                                              |                                 |      |      |     |     |        |          |                            |                                     |                                                                |                                   |      |      |     |     |        |          |                            |                                     |                                                                                                                   |                                   |      |      |     |     |        |      |                                |                                     |                                                                    |                                   |      |      |     |     |        |          |                            |                                     |                                                                                                              |                                 |      |      |     |     |        |      |                                |

|                                                                                                                                                                                                                                                                                                                                                                                                                                                                                                                                                                                                                                                                                                                                                                                                                                                                                                                                                                                                                                                                                                                                                                                                                                                                                                                                                                                                                                                                                                                                                                                                                                                                                                                                                                                                                                                                                                                                                                                                                                                                                                                                                                                                                                                                                                                                                                                                                                                                                                                                                                                                                                                                                                                                                                                                                                                                                                                                                                                                                                                                                                                                                                                                                                                                                                                                                                                                                                                                                                                                                                                                                                                                                                                                                                                                                                                                                                                                                                                                                                                                                                                                                                                                                                                                                                                                                                                                                                                                                                                                                                                                                                                                                                                                                                                                                                                                                                                                                                                                                                                                                                                                                                                                                                                                                                                                                                                                                                                                                                                                                                                                                                                                                                                                                                                                                                                                                                                                                                                                                                                                                                                                                                                                                                                                                                                                                                                                                                                                                                                                                                                                                                                                                                                                                                                                                                                                                                                                                                                                                                                                                                                                                                                                                                                                                                                                                                                                                                                                                                                                                                                                                                                                                                                                                                                                                                                                                                                                                                                                                                                                                                                                                                                                                                                                                                                                                                                                                                                                                                                                                                                                                                                                                                                                                                                                                                                                                                                                                                                                                                                                                                                                                                                                                                                                                                                                                                                                                                                                                                                                                                                                                                                                                                                                                                                                                                                                                                                                                                                                                                                                                                                                                                                                                                                                                                                                                                                                                                                                                                                                                                                                                                                                                                                                                                                                                                                                                                                                                                                                                                                                                                                                                                                                                                                                                                                                                                                                                                                                                                                                                                                                                                                                                                                                                                                                                                                                                                                                                                                                                                                                                                                                                                                                                                                                                                                                                                                                                                                                                                                                                                                                                                                                                                                    |                                                                                                                                                                                                                                                                                                                                                                                                                                                                                                                                                                                                                                                                                                                                                                                                                                                                                                                                                                                                                                                                                                                                                                                                                                                                                                                                                                                                                                                                                                                                                                                                                                                                                                                                                                                                                                                                                                                                                                                                                                                                                                                                                                                                                                                                                                                                                                                                                                                                                                                                                                                                                                                                                                                                                                                                                                                                                                                                                                                                                                                                                                                                                                                                                                                                                                                                                                                                                                                                                                                                                                                                                                                                                                                                                                                                                                                                                                                                                                                                                                                                                                                                                                                                                                                                                                                                                                                                                                                                                                                                                                                                                                                                                                                                                                                                                                                                                                                                                                                                                                                                                                                                                                                                                                                                                                                                                                                                                                                                                                                                                                                                                                                                                                                                                                                                                                                                                                                                                                                                                                                                                                                                                                                                                                                                                                                                                                                                                                                                                                                                                                                                                                                                                                                                                                                                                                                                                                                                                                                                                                                                                                                                                                                                                                                                                                                                                                                                                                                                                                                                                                                                                                                                                                                                                                                                                                                                                                                                                                                                                                                                                                                                                                                                                                                                                                                                                                                                                                                                                                                                                                                                                                                                                                                                                                                                                                                                                                                                                                                                                                                                                                                                                                                                                                                                                                                                                                                                                                                                                                                                                                                                                                                                                                                                                                                                                                                                                                                                                                                                                                                                                                                                                                                                                                                                                                                                                                                                                                                                                                                                                                                                                                                                                                                                                                                                                                                                                                                                                                                                                                                                                                                                                                                                                                                                                                                                                                                                                                                                                                                                                                                                                                                                                                                                                                                                                                                                                                                                                                                                                                                                                                                                                                                                                                                                                                                                                                                                                                                                                                                                                                                                                                                                                                                                                     |                                                                                                                                                                                                                                                                                                                                                                                                                                                                                                                                                                                                                                                                                                                                                                                                                                                                                                                                                                                                                                                                                                                                                                                                                                                                                                                                                                                                                                                                                                                                                                                                                                                                                                                                                                                                                                                                                                                                                                                                                                                                                                                                                                                                                                                                                                                                                                                                                                                                                                                                                                                                                                                                                                                                                                                                                                                                                                                                                                                                                                                                                                                                                                                                                                                                                                                                                                                                                                                                                                                                                                                                                                                                                                                                                                                                                                                                                                                                                                                                                                                                                                                                                                                                                                                                                                                                                                                                                                                                                                                                                                                                                                                                                                                                                                                                                                                                                                                                                                                                                                                                                                                                                                                                                                                                                                                                                                                                                                                                                                                                                                                                                                                                                                                                                                                                                                                                                                                                                                                                                                                                                                                                                                                                                                                                                                                                                                                                                                                                                                                                                                                                                                                                                                                                                                                                                                                                                                                                                                                                                                                                                                                                                                                                                                                                                                                                                                                                                                                                                                                                                                                                                                                                                                                                                                                                                                                                                                                                                                                                                                                                                                                                                                                                                                                                                                                                                                                                                                                                                                                                                                                                                                                                                                                                                                                                                                                                                                                                                                                                                                                                                                                                                                                                                                                                                                                                                                                                                                                                                                                                                                                                                                                                                                                                                                                                                                                                                                                                                                                                                                                                                                                                                                                                                                                                                                                                                                                                                                                                                                                                                                                                                                                                                                                                                                                                                                                                                                                                                                                                                                                                                                                                                                                                                                                                                                                                                                                                                                                                                                                                                                                                                                                                                                                                                                                                                                                                                                                                                                                                                                                                                                                                                                                                                                                                                                                                                                                                                                                                                                                                                                                                                                                                                                                    |
|--------------------------------------------------------------------------------------------------------------------------------------------------------------------------------------------------------------------------------------------------------------------------------------------------------------------------------------------------------------------------------------------------------------------------------------------------------------------------------------------------------------------------------------------------------------------------------------------------------------------------------------------------------------------------------------------------------------------------------------------------------------------------------------------------------------------------------------------------------------------------------------------------------------------------------------------------------------------------------------------------------------------------------------------------------------------------------------------------------------------------------------------------------------------------------------------------------------------------------------------------------------------------------------------------------------------------------------------------------------------------------------------------------------------------------------------------------------------------------------------------------------------------------------------------------------------------------------------------------------------------------------------------------------------------------------------------------------------------------------------------------------------------------------------------------------------------------------------------------------------------------------------------------------------------------------------------------------------------------------------------------------------------------------------------------------------------------------------------------------------------------------------------------------------------------------------------------------------------------------------------------------------------------------------------------------------------------------------------------------------------------------------------------------------------------------------------------------------------------------------------------------------------------------------------------------------------------------------------------------------------------------------------------------------------------------------------------------------------------------------------------------------------------------------------------------------------------------------------------------------------------------------------------------------------------------------------------------------------------------------------------------------------------------------------------------------------------------------------------------------------------------------------------------------------------------------------------------------------------------------------------------------------------------------------------------------------------------------------------------------------------------------------------------------------------------------------------------------------------------------------------------------------------------------------------------------------------------------------------------------------------------------------------------------------------------------------------------------------------------------------------------------------------------------------------------------------------------------------------------------------------------------------------------------------------------------------------------------------------------------------------------------------------------------------------------------------------------------------------------------------------------------------------------------------------------------------------------------------------------------------------------------------------------------------------------------------------------------------------------------------------------------------------------------------------------------------------------------------------------------------------------------------------------------------------------------------------------------------------------------------------------------------------------------------------------------------------------------------------------------------------------------------------------------------------------------------------------------------------------------------------------------------------------------------------------------------------------------------------------------------------------------------------------------------------------------------------------------------------------------------------------------------------------------------------------------------------------------------------------------------------------------------------------------------------------------------------------------------------------------------------------------------------------------------------------------------------------------------------------------------------------------------------------------------------------------------------------------------------------------------------------------------------------------------------------------------------------------------------------------------------------------------------------------------------------------------------------------------------------------------------------------------------------------------------------------------------------------------------------------------------------------------------------------------------------------------------------------------------------------------------------------------------------------------------------------------------------------------------------------------------------------------------------------------------------------------------------------------------------------------------------------------------------------------------------------------------------------------------------------------------------------------------------------------------------------------------------------------------------------------------------------------------------------------------------------------------------------------------------------------------------------------------------------------------------------------------------------------------------------------------------------------------------------------------------------------------------------------------------------------------------------------------------------------------------------------------------------------------------------------------------------------------------------------------------------------------------------------------------------------------------------------------------------------------------------------------------------------------------------------------------------------------------------------------------------------------------------------------------------------------------------------------------------------------------------------------------------------------------------------------------------------------------------------------------------------------------------------------------------------------------------------------------------------------------------------------------------------------------------------------------------------------------------------------------------------------------------------------------------------------------------------------------------------------------------------------------------------------------------------------------------------------------------------------------------------------------------------------------------------------------------------------------------------------------------------------------------------------------------------------------------------------------------------------------------------------------------------------------------------------------------------------------------------------------------------------------------------------------------------------------------------------------------------------------------------------------------------------------------------------------------------------------------------------------------------------------------------------------------------------------------------------------------------------------------------------------------------------------------------------------------------------------------------------------------------------------------------------------------------------------------------------------------------------------------------------------------------------------------------------------------------------------------------------------------------------------------------------------------------------------------------------------------------------------------------------------------------------------------------------------------------------------------------------------------------------------------------------------------------------------------------------------------------------------------------------------------------------------------------------------------------------------------------------------------------------------------------------------------------------------------------------------------------------------------------------------------------------------------------------------------------------------------------------------------------------------------------------------------------------------------------------------------------------------------------------------------------------------------------------------------------------------------------------------------------------------------------------------------------------------------------------------------------------------------------------------------------------------------------------------------------------------------------------------------------------------------------------------------------------------------------------------------------------------------------------------------------------------------------------------------------------------------------------------------------------------------------------------------------------------------------------------------------------------------------------------------------------------------------------------------------------------------------------------------------------------------------------------------------------------------------------------------------------------------------------------------------------------------------------------------------------------------------------------------------------------------------------------------------------------------------------------------------------------------------------------------------------------------------------------------------------------------------------------------------------------------------------------------------------------------------------------------------------------------------------------------------------------------------------------------------------------------------------------------------------------------------------------------------------------------------------------------------------------------------------------------------------------------------------------------------------------------------------------------------------------------------------------------------------------------------------------------------------------------------------------------------------------------------------------------------------------------------------------------------------------------------------------------------------------------------------------------------------------------------------------------------------------------------------------------------------------------------------------------------------------------------------------------------------------------------------------------------------------------------------------------|-----------------------------------------------------------------------------------------------------------------------------------------------------------------------------------------------------------------------------------------------------------------------------------------------------------------------------------------------------------------------------------------------------------------------------------------------------------------------------------------------------------------------------------------------------------------------------------------------------------------------------------------------------------------------------------------------------------------------------------------------------------------------------------------------------------------------------------------------------------------------------------------------------------------------------------------------------------------------------------------------------------------------------------------------------------------------------------------------------------------------------------------------------------------------------------------------------------------------------------------------------------------------------------------------------------------------------------------------------------------------------------------------------------------------------------------------------------------------------------------------------------------------------------------------------------------------------------------------------------------------------------------------------------------------------------------------------------------------------------------------------------------------------------------------------------------------------------------------------------------------------------------------------------------------------------------------------------------------------------------------------------------------------------------------------------------------------------------------------------------------------------------------------------------------------------------------------------------------------------------------------------------------------------------------------------------------------------------------------------------------------------------------------------------------------------------------------------------------------------------------------------------------------------------------------------------------------------------------------------------------------------------------------------------------------------------------------------------------------------------------------------------------------------------------------------------------------------------------------------------------------------------------------------------------------------------------------------------------------------------------------------------------------------------------------------------------------------------------------------------------------------------------------------------------------------------------------------------------------------------------------------------------------------------------------------------------------------------------------------------------------------------------------------------------------------------------------------------------------------------------------------------------------------------------------------------------------------------------------------------------------------------------------------------------------------------------------------------------------------------------------------------------------------------------------------------------------------------------------------------------------------------------------------------------------------------------------------------------------------------------------------------------------------------------------------------------------------------------------------------------------------------------------------------------------------------------------------------------------------------------------------------------------------------------------------------------------------------------------------------------------------------------------------------------------------------------------------------------------------------------------------------------------------------------------------------------------------------------------------------------------------------------------------------------------------------------------------------------------------------------------------------------------------------------------------------------------------------------------------------------------------------------------------------------------------------------------------------------------------------------------------------------------------------------------------------------------------------------------------------------------------------------------------------------------------------------------------------------------------------------------------------------------------------------------------------------------------------------------------------------------------------------------------------------------------------------------------------------------------------------------------------------------------------------------------------------------------------------------------------------------------------------------------------------------------------------------------------------------------------------------------------------------------------------------------------------------------------------------------------------------------------------------------------------------------------------------------------------------------------------------------------------------------------------------------------------------------------------------------------------------------------------------------------------------------------------------------------------------------------------------------------------------------------------------------------------------------------------------------------------------------------------------------------------------------------------------------------------------------------------------------------------------------------------------------------------------------------------------------------------------------------------------------------------------------------------------------------------------------------------------------------------------------------------------------------------------------------------------------------------------------------------------------------------------------------------------------------------------------------------------------------------------------------------------------------------------------------------------------------------------------------------------------------------------------------------------------------------------------------------------------------------------------------------------------------------------------------------------------------------------------------------------------------------------------------------------------------------------------------------------------------------------------------------------------------------------------------------------------------------------------------------------------------------------------------------------------------------------------------------------------------------------------------------------------------------------------------------------------------------------------------------------------------------------------------------------------------------------------------------------------------------------------------------------------------------------------------------------------------------------------------------------------------------------------------------------------------------------------------------------------------------------------------------------------------------------------------------------------------------------------------------------------------------------------------------------------------------------------------------------------------------------------------------------------------------------------------------------------------------------------------------------------------------------------------------------------------------------------------------------------------------------------------------------------------------------------------------------------------------------------------------------------------------------------------------------------------------------------------------------------------------------------------------------------------------------------------------------------------------------------------------------------------------------------------------------------------------------------------------------------------------------------------------------------------------------------------------------------------------------------------------------------------------------------------------------------------------------------------------------------------------------------------------------------------------------------------------------------------------------------------------------------------------------------------------------------------------------------------------------------------------------------------------------------------------------------------------------------------------------------------------------------------------------------------------------------------------------------------------------------------------------------------------------------------------------------------------------------------------------------------------------------------------------------------------------------------------------------------------------------------------------------------------------------------------------------------------------------------------------------------------------------------------------------------------------------------------------------------------------------------------------------------------------------------------------------------------------------------------------------------------------------------------------------------------------------------------------------------------------------------------------------------------------------------------------------------------------------------------------------------------------------------------------------------------------------------------------------------------------------------------------------------------------------------------------------------------------------------------------------------------------------------------------------------------------------------------------------------------------------------------------------------------------------------------------------------------------------------------------------------------------------------------------------------------------------------------------------------------------------------------------------------------------------------------------------------------------------------------------------------------------------------------------------------------------------------------------------------------------------------------------------------------------------------------------------------------------------------------------------------------------------------------------------------------------------------------------------------------------------------------------------------------------------------------------------------------------------------------------------------------------------------------------------------------------------------------------------------------------------------------------------------------------------------------------------------------------------------------------------------------------------------------------------------------------------------------------------------------------------------------------------------------------------------------------------------------------------------------------------------------------------------------------------------------------------------------------------------------------|--------------------------------------------------------------------------------------------------------------------------------------------------------------------------------------------------------------------------------------------------------------------------------------------------------------------------------------------------------------------------------------------------------------------------------------------------------------------------------------------------------------------------------------------------------------------------------------------------------------------------------------------------------------------------------------------------------------------------------------------------------------------------------------------------------------------------------------------------------------------------------------------------------------------------------------------------------------------------------------------------------------------------------------------------------------------------------------------------------------------------------------------------------------------------------------------------------------------------------------------------------------------------------------------------------------------------------------------------------------------------------------------------------------------------------------------------------------------------------------------------------------------------------------------------------------------------------------------------------------------------------------------------------------------------------------------------------------------------------------------------------------------------------------------------------------------------------------------------------------------------------------------------------------------------------------------------------------------------------------------------------------------------------------------------------------------------------------------------------------------------------------------------------------------------------------------------------------------------------------------------------------------------------------------------------------------------------------------------------------------------------------------------------------------------------------------------------------------------------------------------------------------------------------------------------------------------------------------------------------------------------------------------------------------------------------------------------------------------------------------------------------------------------------------------------------------------------------------------------------------------------------------------------------------------------------------------------------------------------------------------------------------------------------------------------------------------------------------------------------------------------------------------------------------------------------------------------------------------------------------------------------------------------------------------------------------------------------------------------------------------------------------------------------------------------------------------------------------------------------------------------------------------------------------------------------------------------------------------------------------------------------------------------------------------------------------------------------------------------------------------------------------------------------------------------------------------------------------------------------------------------------------------------------------------------------------------------------------------------------------------------------------------------------------------------------------------------------------------------------------------------------------------------------------------------------------------------------------------------------------------------------------------------------------------------------------------------------------------------------------------------------------------------------------------------------------------------------------------------------------------------------------------------------------------------------------------------------------------------------------------------------------------------------------------------------------------------------------------------------------------------------------------------------------------------------------------------------------------------------------------------------------------------------------------------------------------------------------------------------------------------------------------------------------------------------------------------------------------------------------------------------------------------------------------------------------------------------------------------------------------------------------------------------------------------------------------------------------------------------------------------------------------------------------------------------------------------------------------------------------------------------------------------------------------------------------------------------------------------------------------------------------------------------------------------------------------------------------------------------------------------------------------------------------------------------------------------------------------------------------------------------------------------------------------------------------------------------------------------------------------------------------------------------------------------------------------------------------------------------------------------------------------------------------------------------------------------------------------------------------------------------------------------------------------------------------------------------------------------------------------------------------------------------------------------------------------------------------------------------------------------------------------------------------------------------------------------------------------------------------------------------------------------------------------------------------------------------------------------------------------------------------------------------------------------------------------------------------------------------------------------------------------------------------------------------------------------------------------------------------------------------------------------------------------------------------------------------------------------------------------------------------------------------------------------------------------------------------------------------------------------------------------------------------------------------------------------------------------------------------------------------------------------------------------------------------------------------------------------------------------------------------------------------------------------------------------------------------------------------------------------------------------------------------------------------------------------------------------------------------------------------------------------------------------------------------------------------------------------------------------------------------------------------------------------------------------------------------------------------------------------------------------------------------------------------------------------------------------------------------------------------------------------------------------------------------------------------------------------------------------------------------------------------------------------------------------------------------------------------------------------------------------------------------------------------------------------------------------------------------------------------------------------------------------------------------------------------------------------------------------------------------------------------------------------------------------------------------------------------------------------------------------------------------------------------------------------------------------------------------------------------------------------------------------------------------------------------------------------------------------------------------------------------------------------------------------------------------------------------------------------------------------------------------------------------------------------------------------------------------------------------------------------------------------------------------------------------------------------------------------------------------------------------------------------------------------------------------------------------------------------------------------------------------------------------------------------------------------------------------------------------------------------------------------------------------------------------------------------------------------------------------------------------------------------------------------------------------------------------------------------------------------------------------------------------------------------------------------------------------------------------------------------------------------------------------------------------------------------------------------------------------------------------------------------------------------------------------------------------------------------------------------------------------------------------------------------------------------------------------------------------------------------------------------------------------------------------------------------------------------------------------------------------------------------------------------------------------------------------------------------------------------------------------------------------------------------------------------------------------------------------------------------------------------------------------------------------------------------------------------------------------------------------------------------------------------------------------------------------------------------------------------------------------------------------------------------------------------------------------------------------------------------------------------------------------------------------------------------------------------------------------------------------------------------------------------------------------------------------------------------------------------------------------------------------------------------------------------------------------------------------------------------------------------------------------------------------------------------------------------------------------------------------------------------------------------------------------------------------------------------------------------------------------------------------------------------------------------------------------------------------------------------------------------------------------------------------------------------------------------------------------------------------------------------------------------------------------------------------------------------------------------------------------------------------------------------------------------------------------------------------------------------------------------------------------------------------------------------------------------------------------------------------------------------------------------------------------------------------------------------------------------------------------------------------------------------------------------------------------------------------------------------------------------------------------------------------------|
| <div>InR2</div> <div>TRINITY_D</div> <div>N6759_c0_g</div> <div>1</div>                                                                                                                                                                                                                                                                                                                                                                                                                                                                                                                                                                                                                                                                                                                                                                                                                                                                                                                                                                                                                                                                                                                                                                                                                                                                                                                                                                                                                                                                                                                                                                                                                                                                                                                                                                                                                                                                                                                                                                                                                                                                                                                                                                                                                                                                                                                                                                                                                                                                                                                                                                                                                                                                                                                                                                                                                                                                                                                                                                                                                                                                                                                                                                                                                                                                                                                                                                                                                                                                                                                                                                                                                                                                                                                                                                                                                                                                                                                                                                                                                                                                                                                                                                                                                                                                                                                                                                                                                                                                                                                                                                                                                                                                                                                                                                                                                                                                                                                                                                                                                                                                                                                                                                                                                                                                                                                                                                                                                                                                                                                                                                                                                                                                                                                                                                                                                                                                                                                                                                                                                                                                                                                                                                                                                                                                                                                                                                                                                                                                                                                                                                                                                                                                                                                                                                                                                                                                                                                                                                                                                                                                                                                                                                                                                                                                                                                                                                                                                                                                                                                                                                                                                                                                                                                                                                                                                                                                                                                                                                                                                                                                                                                                                                                                                                                                                                                                                                                                                                                                                                                                                                                                                                                                                                                                                                                                                                                                                                                                                                                                                                                                                                                                                                                                                                                                                                                                                                                                                                                                                                                                                                                                                                                                                                                                                                                                                                                                                                                                                                                                                                                                                                                                                                                                                                                                                                                                                                                                                                                                                                                                                                                                                                                                                                                                                                                                                                                                                                                                                                                                                                                                                                                                                                                                                                                                                                                                                                                                                                                                                                                                                                                                                                                                                                                                                                                                                                                                                                                                                                                                                                                                                                                                                                                                                                                                                                                                                                                                                                                                                                                                                                                                                                            | <table><tr><td><div><div><div><div><div><div></div></div></div><div><div><div></div></div></div><div><div><div></div></div></div><div><div><div></div></div></div><div><div><div></div></div></div><div><div><div></div></div></div><div><div><div></div></div></div><div><div><div></div></div></div><div><div><div></div></div></div><div><div><div></div></div></div><div><div><div></div></div></div><div><div><div></div></div></div><div><div><div></div></div></div><div><div><div></div></div></div><div><div><div></div></div></div><div><div><div></div></div></div><div><div><div></div></div></div><div><div><div></div></div></div><div><div><div></div></div></div><div><div><div></div></div></div><div><div><div></div></div></div><div><div><div></div></div></div><div><div><div></div></div></div><div><div><div></div></div></div><div><div><div></div></div></div><div><div><div></div></div></div><div><div><div></div></div></div><div><div><div></div></div></div><div><div><div></div></div></div><div><div><div></div></div></div><div><div><div></div></div></div><div><div><div></div></div></div><div><div><div></div></div></div><div><div><div></div></div></div><div><div><div></div></div></div><div><div><div></div></div></div><div><div><div></div></div></div><div><div><div></div></div></div><div><div><div></div></div></div><div><div><div></div></div></div><div><div><div></div></div></div><div><div><div></div></div></div><div><div><div></div></div></div><div><div><div></div></div></div><div><div><div></div></div></div><div><div><div></div></div></div><div><div><div></div></div></div><div><div><div></div></div></div><div><div><div></div></div></div><div><div><div></div></div></div><div><div><div></div></div></div><div><div><div></div></div></div><div><div><div></div></div></div><div><div><div></div></div></div><div><div><div></div></div></div><div><div><div></div></div></div><div><div><div></div></div></div><div><div><div></div></div></div><div><div><div></div></div></div><div><div><div></div></div></div><div><div><div></div></div></div><div><div><div></div></div></div><div><div><div></div></div></div><div><div><div></div></div></div><div><div><div></div></div></div><div><div><div></div></div></div><div><div><div></div></div></div><div><div><div></div></div></div><div><div><div></div></div></div><div><div><div></div></div></div><div><div><div></div></div></div><div><div><div></div></div></div><div><div><div></div></div></div><div><div><div></div></div></div><div><div><div></div></div></div><div><div><div></div></div></div><div><div><div></div></div></div><div><div><div></div></div></div><div><div><div></div></div></div><div><div><div></div></div></div><div><div><div></div></div></div><div><div><div></div></div></div><div><div><div></div></div></div><div><div><div></div></div></div><div><div><div></div></div></div><div><div><div></div></div></div><div><div><div></div></div></div><div><div><div></div></div></div><div><div><div></div></div></div><div><div><div></div></div></div><div><div><div></div></div></div><div><div><div></div></div></div><div><div><div></div></div></div><div><div><div></div></div></div><div><div><div></div></div></div><div><div><div></div></div></div><div><div><div></div></div></div><div><div><div></div></div></div><div><div><div></div></div></div><div><div><div></div></div></div><div><div><div></div></div></div><div><div><div></div></div></div><div><div><div></div></div></div><div><div><div></div></div></div><div><div><div></div></div></div><div><div><div></div></div></div><div><div><div></div></div></div><div><div><div></div></div></div><div><div><div></div></div></div><div><div><div></div></div></div><div><div><div></div></div></div><div><div><div></div></div></div><div><div><div></div></div></div><div><div><div></div></div></div><div><div><div></div></div></div><div><div><div></div></div></div><div><div><div></div></div></div><div><div><div></div></div></div><div><div><div></div></div></div><div><div><div></div></div></div><div><div><div></div></div></div><div><div><div></div></div></div><div><div><div></div></div></div><div><div><div></div></div></div><div><div><div></div></div></div><div><div><div></div></div></div><div><div><div></div></div></div><div><div><div></div></div></div><div><div><div></div></div></div><div><div><div></div></div></div><div><div><div></div></div></div><div><div><div></div></div></div><div><div><div></div></div></div><div><div><div></div></div></div><div><div><div></div></div></div><div><div><div></div></div></div><div><div><div></div></div></div><div><div><div></div></div></div><div><div><div></div></div></div><div><div><div></div></div></div><div><div><div></div></div></div><div><div><div></div></div></div><div><div><div></div></div></div><div><div><div></div></div></div><div><div><div></div></div></div><div><div><div></div></div></div><div><div><div></div></div></div><div><div><div></div></div></div><div><div><div></div></div></div><div><div><div></div></div></div><div><div><div></div></div></div><div><div><div></div></div></div><div><div><div></div></div></div><div><div><div></div></div></div><div><div><div></div></div></div><div><div><div></div></div></div><div><div><div></div></div></div><div><div><div></div></div></div><div><div><div></div></div></div><div><div><div></div></div></div><div><div><div></div></div></div><div><div><div></div></div></div><div><div><div></div></div></div><div><div><div></div></div></div><div><div><div></div></div></div><div><div><div></div></div></div><div><div><div></div></div></div><div><div><div></div></div></div><div><div><div></div></div></div><div><div><div></div></div></div><div><div><div></div></div></div><div><div><div></div></div></div><div><div><div></div></div></div><div><div><div></div></div></div><div><div><div></div></div></div><div><div><div></div></div></div><div><div><div></div></div></div><div><div><div></div></div></div><div><div><div></div></div></div><div><div><div></div></div></div><div><div><div></div></div></div><div><div><div></div></div></div><div><div><div></div></div></div><div><div><div></div></div></div><div><div><div></div></div></div><div><div><div></div></div></div><div><div><div></div></div></div><div><div><div></div></div></div><div><div><div></div></div></div><div><div><div></div></div></div><div><div><div></div></div></div><div><div><div></div></div></div><div><div><div></div></div></div><div><div><div></div></div></div><div><div><div></div></div></div><div><div><div></div></div></div><div><div><div></div></div></div><div><div><div></div></div></div><div><div><div></div></div></div><div><div><div></div></div></div><div><div><div></div></div></div><div><div><div></div></div></div><div><div><div></div></div></div><div><div><div></div></div></div><div><div><div></div></div></div><div><div><div></div></div></div><div><div><div></div></div></div><div><div><div></div></div></div><div><div><div></div></div></div><div><div><div></div></div></div><div><div><div></div></div></div><div><div><div></div></div></div><div><div><div></div></div></div><div><div><div></div></div></div><div><div><div></div></div></div><div><div><div></div></div></div><div><div><div></div></div></div><div><div><div></div></div></div><div><div><div></div></div></div><div><div><div></div></div></div><div><div><div></div></div></div><div><div><div></div></div></div><div><div><div></div></div></div><div><div><div></div></div></div><div><div><div></div></div></div><div><div><div></div></div></div><div><div><div></div></div></div><div><div><div></div></div></div><div><div><div></div></div></div><div><div><div></div></div></div><div><div><div></div></div></div><div><div><div></div></div></div><div><div><div></div></div></div><div><div><div></div></div></div><div><div><div></div></div></div><div><div><div></div></div></div><div><div><div></div></div></div><div><div><div></div></div></div><div><div><div></div></div></div><div><div><div></div></div></div><div><div><div></div></div></div><div><div><div></div></div></div><div><div><div></div></div></div><div><div><div></div></div></div><div><div><div></div></div></div><div><div><div></div></div></div><div><div><div></div></div></div><div><div><div></div></div></div><div><div><div></div></div></div><div><div><div></div></div></div><div><div><div></div></div></div><div><div><div></div></div></div><div><div><div></div></div></div><div><div><div></div></div></div><div><div><div></div></div></div><div><div><div></div></div></div><div><div><div></div></div></div><div><div><div></div></div></div><div><div><div></div></div></div><div><div><div></div></div></div><div><div><div></div></div></div><div><div><div></div></div></div><div><div><div></div></div></div><div><div><div></div></div></div><div><div><div></div></div></div><div><div><div></div></div></div><div><div><div></div></div></div><div><div><div></div></div></div><div><div><div></div></div></div><div><div><div></div></div></div><div><div><div></div></div></div><div><div><div></div></div></div><div><div><div></div></div></div><div><div><div></div></div></div><div><div><div></div></div></div><div><div><div></div></div></div><div><div><div></div></div></div><div><div><div></div></div></div><div><div><div></div></div></div><div><div><div></div></div></div><div><div><div></div></div></div><div><div><div></div></div></div><div><div><div></div></div></div><div><div><div></div></div></div><div><div><div></div></div></div><div><div><div></div></div></div><div><div><div></div></div></div><div><div><div></div></div></div><div><div><div></div></div></div><div><div><div></div></div></div><div><div><div></div></div></div><div><div><div></div></div></div><div><div><div></div></div></div><div><div><div></div></div></div><div><div><div></div></div></div><div><div><div></div></div></div><div><div><div></div></div></div><div><div><div></div></div></div><div><div><div></div></div></div><div><div><div></div></div></div><div><div><div></div></div></div><div><div><div></div></div></div><div><div><div></div></div></div><div><div><div></div></div></div><div><div><div></div></div></div><div><div><div></div></div></div><div><div><div></div></div></div><div><div><div></div></div></div><div><div><div></div></div></div><div><div><div></div></div></div><div><div><div></div></div></div><div><div><div></div></div></div><div><div><div></div></div></div><div><div><div></div></div></div><div><div><div></div></div></div><div><div><div></div></div></div><div><div><div></div></div></div><div><div><div></div></div></div><div><div><div></div></div></div><div><div><div></div></div></div><div><div><div></div></div></div><div><div><div></div></div></div><div><div><div></div></div></div><div><div><div></div></div></div><div><div><div></div></div></div><div><div><div></div></div></div><div><div><div></div></div></div><div><div><div></div></div></div><div><div><div></div></div></div><div><div><div></div></div></div><div><div><div></div></div></div><div><div><div></div></div></div><div><div><div></div></div></div><div><div><div></div></div></div><div><div><div></div></div></div><div><div><div></div></div></div><div><div><div></div></div></div><div><div><div></div></div></div><div><div><div></div></div></div><div><div><div></div></div></div><div><div><div></div></div></div><div><div><div></div></div></div><div><div><div></div></div></div><div><div><div></div></div></div><div><div><div></div></div></div><div><div><div></div></div></div><div><div><div></div></div></div><div><div><div></div></div></div><div><div><div></div></div></div><div><div><div></div></div></div><div><div><div></div></div></div><div><div><div></div></div></div><div><div><div></div></div></div><div><div><div></div></div></div><div><div><div></div></div></div><div><div><div></div></div></div><div><div><div></div></div></div><div><div><div></div></div></div><div><div><div></div></div></div><div><div><div></div></div></div><div><div><div></div></div></div><div><div><div></div></div></div><div><div><div></div></div></div><div><div><div></div></div></div><div><div><div></div></div></div><div><div><div></div></div></div><div><div><div></div></div></div><div><div><div></div></div></div><div><div><div></div></div></div></div></div></div></td></tr></table> | <div><div><div><div><div><div></div></div></div><div><div><div></div></div></div><div><div><div></div></div></div><div><div><div></div></div></div><div><div><div></div></div></div><div><div><div></div></div></div><div><div><div></div></div></div><div><div><div></div></div></div><div><div><div></div></div></div><div><div><div></div></div></div><div><div><div></div></div></div><div><div><div></div></div></div><div><div><div></div></div></div><div><div><div></div></div></div><div><div><div></div></div></div><div><div><div></div></div></div><div><div><div></div></div></div><div><div><div></div></div></div><div><div><div></div></div></div><div><div><div></div></div></div><div><div><div></div></div></div><div><div><div></div></div></div><div><div><div></div></div></div><div><div><div></div></div></div><div><div><div></div></div></div><div><div><div></div></div></div><div><div><div></div></div></div><div><div><div></div></div></div><div><div><div></div></div></div><div><div><div></div></div></div><div><div><div></div></div></div><div><div><div></div></div></div><div><div><div></div></div></div><div><div><div></div></div></div><div><div><div></div></div></div><div><div><div></div></div></div><div><div><div></div></div></div><div><div><div></div></div></div><div><div><div></div></div></div><div><div><div></div></div></div><div><div><div></div></div></div><div><div><div></div></div></div><div><div><div></div></div></div><div><div><div></div></div></div><div><div><div></div></div></div><div><div><div></div></div></div><div><div><div></div></div></div><div><div><div></div></div></div><div><div><div></div></div></div><div><div><div></div></div></div><div><div><div></div></div></div><div><div><div></div></div></div><div><div><div></div></div></div><div><div><div></div></div></div><div><div><div></div></div></div><div><div><div></div></div></div><div><div><div></div></div></div><div><div><div></div></div></div><div><div><div></div></div></div><div><div><div></div></div></div><div><div><div></div></div></div><div><div><div></div></div></div><div><div><div></div></div></div><div><div><div></div></div></div><div><div><div></div></div></div><div><div><div></div></div></div><div><div><div></div></div></div><div><div><div></div></div></div><div><div><div></div></div></div><div><div><div></div></div></div><div><div><div></div></div></div><div><div><div></div></div></div><div><div><div></div></div></div><div><div><div></div></div></div><div><div><div></div></div></div><div><div><div></div></div></div><div><div><div></div></div></div><div><div><div></div></div></div><div><div><div></div></div></div><div><div><div></div></div></div><div><div><div></div></div></div><div><div><div></div></div></div><div><div><div></div></div></div><div><div><div></div></div></div><div><div><div></div></div></div><div><div><div></div></div></div><div><div><div></div></div></div><div><div><div></div></div></div><div><div><div></div></div></div><div><div><div></div></div></div><div><div><div></div></div></div><div><div><div></div></div></div><div><div><div></div></div></div><div><div><div></div></div></div><div><div><div></div></div></div><div><div><div></div></div></div><div><div><div></div></div></div><div><div><div></div></div></div><div><div><div></div></div></div><div><div><div></div></div></div><div><div><div></div></div></div><div><div><div></div></div></div><div><div><div></div></div></div><div><div><div></div></div></div><div><div><div></div></div></div><div><div><div></div></div></div><div><div><div></div></div></div><div><div><div></div></div></div><div><div><div></div></div></div><div><div><div></div></div></div><div><div><div></div></div></div><div><div><div></div></div></div><div><div><div></div></div></div><div><div><div></div></div></div><div><div><div></div></div></div><div><div><div></div></div></div><div><div><div></div></div></div><div><div><div></div></div></div><div><div><div></div></div></div><div><div><div></div></div></div><div><div><div></div></div></div><div><div><div></div></div></div><div><div><div></div></div></div><div><div><div></div></div></div><div><div><div></div></div></div><div><div><div></div></div></div><div><div><div></div></div></div><div><div><div></div></div></div><div><div><div></div></div></div><div><div><div></div></div></div><div><div><div></div></div></div><div><div><div></div></div></div><div><div><div></div></div></div><div><div><div></div></div></div><div><div><div></div></div></div><div><div><div></div></div></div><div><div><div></div></div></div><div><div><div></div></div></div><div><div><div></div></div></div><div><div><div></div></div></div><div><div><div></div></div></div><div><div><div></div></div></div><div><div><div></div></div></div><div><div><div></div></div></div><div><div><div></div></div></div><div><div><div></div></div></div><div><div><div></div></div></div><div><div><div></div></div></div><div><div><div></div></div></div><div><div><div></div></div></div><div><div><div></div></div></div><div><div><div></div></div></div><div><div><div></div></div></div><div><div><div></div></div></div><div><div><div></div></div></div><div><div><div></div></div></div><div><div><div></div></div></div><div><div><div></div></div></div><div><div><div></div></div></div><div><div><div></div></div></div><div><div><div></div></div></div><div><div><div></div></div></div><div><div><div></div></div></div><div><div><div></div></div></div><div><div><div></div></div></div><div><div><div></div></div></div><div><div><div></div></div></div><div><div><div></div></div></div><div><div><div></div></div></div><div><div><div></div></div></div><div><div><div></div></div></div><div><div><div></div></div></div><div><div><div></div></div></div><div><div><div></div></div></div><div><div><div></div></div></div><div><div><div></div></div></div><div><div><div></div></div></div><div><div><div></div></div></div><div><div><div></div></div></div><div><div><div></div></div></div><div><div><div></div></div></div><div><div><div></div></div></div><div><div><div></div></div></div><div><div><div></div></div></div><div><div><div></div></div></div><div><div><div></div></div></div><div><div><div></div></div></div><div><div><div></div></div></div><div><div><div></div></div></div><div><div><div></div></div></div><div><div><div></div></div></div><div><div><div></div></div></div><div><div><div></div></div></div><div><div><div></div></div></div><div><div><div></div></div></div><div><div><div></div></div></div><div><div><div></div></div></div><div><div><div></div></div></div><div><div><div></div></div></div><div><div><div></div></div></div><div><div><div></div></div></div><div><div><div></div></div></div><div><div><div></div></div></div><div><div><div></div></div></div><div><div><div></div></div></div><div><div><div></div></div></div><div><div><div></div></div></div><div><div><div></div></div></div><div><div><div></div></div></div><div><div><div></div></div></div><div><div><div></div></div></div><div><div><div></div></div></div><div><div><div></div></div></div><div><div><div></div></div></div><div><div><div></div></div></div><div><div><div></div></div></div><div><div><div></div></div></div><div><div><div></div></div></div><div><div><div></div></div></div><div><div><div></div></div></div><div><div><div></div></div></div><div><div><div></div></div></div><div><div><div></div></div></div><div><div><div></div></div></div><div><div><div></div></div></div><div><div><div></div></div></div><div><div><div></div></div></div><div><div><div></div></div></div><div><div><div></div></div></div><div><div><div></div></div></div><div><div><div></div></div></div><div><div><div></div></div></div><div><div><div></div></div></div><div><div><div></div></div></div><div><div><div></div></div></div><div><div><div></div></div></div><div><div><div></div></div></div><div><div><div></div></div></div><div><div><div></div></div></div><div><div><div></div></div></div><div><div><div></div></div></div><div><div><div></div></div></div><div><div><div></div></div></div><div><div><div></div></div></div><div><div><div></div></div></div><div><div><div></div></div></div><div><div><div></div></div></div><div><div><div></div></div></div><div><div><div></div></div></div><div><div><div></div></div></div><div><div><div></div></div></div><div><div><div></div></div></div><div><div><div></div></div></div><div><div><div></div></div></div><div><div><div></div></div></div><div><div><div></div></div></div><div><div><div></div></div></div><div><div><div></div></div></div><div><div><div></div></div></div><div><div><div></div></div></div><div><div><div></div></div></div><div><div><div></div></div></div><div><div><div></div></div></div><div><div><div></div></div></div><div><div><div></div></div></div><div><div><div></div></div></div><div><div><div></div></div></div><div><div><div></div></div></div><div><div><div></div></div></div><div><div><div></div></div></div><div><div><div></div></div></div><div><div><div></div></div></div><div><div><div></div></div></div><div><div><div></div></div></div><div><div><div></div></div></div><div><div><div></div></div></div><div><div><div></div></div></div><div><div><div></div></div></div><div><div><div></div></div></div><div><div><div></div></div></div><div><div><div></div></div></div><div><div><div></div></div></div><div><div><div></div></div></div><div><div><div></div></div></div><div><div><div></div></div></div><div><div><div></div></div></div><div><div><div></div></div></div><div><div><div></div></div></div><div><div><div></div></div></div><div><div><div></div></div></div><div><div><div></div></div></div><div><div><div></div></div></div><div><div><div></div></div></div><div><div><div></div></div></div><div><div><div></div></div></div><div><div><div></div></div></div><div><div><div></div></div></div><div><div><div></div></div></div><div><div><div></div></div></div><div><div><div></div></div></div><div><div><div></div></div></div><div><div><div></div></div></div><div><div><div></div></div></div><div><div><div></div></div></div><div><div><div></div></div></div><div><div><div></div></div></div><div><div><div></div></div></div><div><div><div></div></div></div><div><div><div></div></div></div><div><div><div></div></div></div><div><div><div></div></div></div><div><div><div></div></div></div><div><div><div></div></div></div><div><div><div></div></div></div><div><div><div></div></div></div><div><div><div></div></div></div><div><div><div></div></div></div><div><div><div></div></div></div><div><div><div></div></div></div><div><div><div></div></div></div><div><div><div></div></div></div><div><div><div></div></div></div><div><div><div></div></div></div><div><div><div></div></div></div><div><div><div></div></div></div><div><div><div></div></div></div><div><div><div></div></div></div><div><div><div></div></div></div><div><div><div></div></div></div><div><div><div></div></div></div><div><div><div></div></div></div><div><div><div></div></div></div><div><div><div></div></div></div><div><div><div></div></div></div><div><div><div></div></div></div><div><div><div></div></div></div><div><div><div></div></div></div><div><div><div></div></div></div><div><div><div></div></div></div><div><div><div></div></div></div><div><div><div></div></div></div><div><div><div></div></div></div><div><div><div></div></div></div><div><div><div></div></div></div><div><div><div></div></div></div><div><div><div></div></div></div><div><div><div></div></div></div><div><div><div></div></div></div><div><div><div></div></div></div><div><div><div></div></div></div><div><div><div></div></div></div><div><div><div></div></div></div><div><div><div></div></div></div><div><div><div></div></div></div><div><div><div></div></div></div><div><div><div></div></div></div><div><div><div></div></div></div><div><div><div></div></div></div><div><div><div></div></div></div><div><div><div></div></div></div><div><div><div></div></div></div><div><div><div></div></div></div><div><div><div></div></div></div><div><div><div></div></div></div><div><div><div></div></div></div><div><div><div></div></div></div><div><div><div></div></div></div><div><div><div></div></div></div><div><div><div></div></div></div></div></div></div> |
| <div><div><div><div><div><div></div></div></div><div><div><div></div></div></div><div><div><div></div></div></div><div><div><div></div></div></div><div><div><div></div></div></div><div><div><div></div></div></div><div><div><div></div></div></div><div><div><div></div></div></div><div><div><div></div></div></div><div><div><div></div></div></div><div><div><div></div></div></div><div><div><div></div></div></div><div><div><div></div></div></div><div><div><div></div></div></div><div><div><div></div></div></div><div><div><div></div></div></div><div><div><div></div></div></div><div><div><div></div></div></div><div><div><div></div></div></div><div><div><div></div></div></div><div><div><div></div></div></div><div><div><div></div></div></div><div><div><div></div></div></div><div><div><div></div></div></div><div><div><div></div></div></div><div><div><div></div></div></div><div><div><div></div></div></div><div><div><div></div></div></div><div><div><div></div></div></div><div><div><div></div></div></div><div><div><div></div></div></div><div><div><div></div></div></div><div><div><div></div></div></div><div><div><div></div></div></div><div><div><div></div></div></div><div><div><div></div></div></div><div><div><div></div></div></div><div><div><div></div></div></div><div><div><div></div></div></div><div><div><div></div></div></div><div><div><div></div></div></div><div><div><div></div></div></div><div><div><div></div></div></div><div><div><div></div></div></div><div><div><div></div></div></div><div><div><div></div></div></div><div><div><div></div></div></div><div><div><div></div></div></div><div><div><div></div></div></div><div><div><div></div></div></div><div><div><div></div></div></div><div><div><div></div></div></div><div><div><div></div></div></div><div><div><div></div></div></div><div><div><div></div></div></div><div><div><div></div></div></div><div><div><div></div></div></div><div><div><div></div></div></div><div><div><div></div></div></div><div><div><div></div></div></div><div><div><div></div></div></div><div><div><div></div></div></div><div><div><div></div></div></div><div><div><div></div></div></div><div><div><div></div></div></div><div><div><div></div></div></div><div><div><div></div></div></div><div><div><div></div></div></div><div><div><div></div></div></div><div><div><div></div></div></div><div><div><div></div></div></div><div><div><div></div></div></div><div><div><div></div></div></div><div><div><div></div></div></div><div><div><div></div></div></div><div><div><div></div></div></div><div><div><div></div></div></div><div><div><div></div></div></div><div><div><div></div></div></div><div><div><div></div></div></div><div><div><div></div></div></div><div><div><div></div></div></div><div><div><div></div></div></div><div><div><div></div></div></div><div><div><div></div></div></div><div><div><div></div></div></div><div><div><div></div></div></div><div><div><div></div></div></div><div><div><div></div></div></div><div><div><div></div></div></div><div><div><div></div></div></div><div><div><div></div></div></div><div><div><div></div></div></div><div><div><div></div></div></div><div><div><div></div></div></div><div><div><div></div></div></div><div><div><div></div></div></div><div><div><div></div></div></div><div><div><div></div></div></div><div><div><div></div></div></div><div><div><div></div></div></div><div><div><div></div></div></div><div><div><div></div></div></div><div><div><div></div></div></div><div><div><div></div></div></div><div><div><div></div></div></div><div><div><div></div></div></div><div><div><div></div></div></div><div><div><div></div></div></div><div><div><div></div></div></div><div><div><div></div></div></div><div><div><div></div></div></div><div><div><div></div></div></div><div><div><div></div></div></div><div><div><div></div></div></div><div><div><div></div></div></div><div><div><div></div></div></div><div><div><div></div></div></div><div><div><div></div></div></div><div><div><div></div></div></div><div><div><div></div></div></div><div><div><div></div></div></div><div><div><div></div></div></div><div><div><div></div></div></div><div><div><div></div></div></div><div><div><div></div></div></div><div><div><div></div></div></div><div><div><div></div></div></div><div><div><div></div></div></div><div><div><div></div></div></div><div><div><div></div></div></div><div><div><div></div></div></div><div><div><div></div></div></div><div><div><div></div></div></div><div><div><div></div></div></div><div><div><div></div></div></div><div><div><div></div></div></div><div><div><div></div></div></div><div><div><div></div></div></div><div><div><div></div></div></div><div><div><div></div></div></div><div><div><div></div></div></div><div><div><div></div></div></div><div><div><div></div></div></div><div><div><div></div></div></div><div><div><div></div></div></div><div><div><div></div></div></div><div><div><div></div></div></div><div><div><div></div></div></div><div><div><div></div></div></div><div><div><div></div></div></div><div><div><div></div></div></div><div><div><div></div></div></div><div><div><div></div></div></div><div><div><div></div></div></div><div><div><div></div></div></div><div><div><div></div></div></div><div><div><div></div></div></div><div><div><div></div></div></div><div><div><div></div></div></div><div><div><div></div></div></div><div><div><div></div></div></div><div><div><div></div></div></div><div><div><div></div></div></div><div><div><div></div></div></div><div><div><div></div></div></div><div><div><div></div></div></div><div><div><div></div></div></div><div><div><div></div></div></div><div><div><div></div></div></div><div><div><div></div></div></div><div><div><div></div></div></div><div><div><div></div></div></div><div><div><div></div></div></div><div><div><div></div></div></div><div><div><div></div></div></div><div><div><div></div></div></div><div><div><div></div></div></div><div><div><div></div></div></div><div><div><div></div></div></div><div><div><div></div></div></div><div><div><div></div></div></div><div><div><div></div></div></div><div><div><div></div></div></div><div><div><div></div></div></div><div><div><div></div></div></div><div><div><div></div></div></div><div><div><div></div></div></div><div><div><div></div></div></div><div><div><div></div></div></div><div><div><div></div></div></div><div><div><div></div></div></div><div><div><div></div></div></div><div><div><div></div></div></div><div><div><div></div></div></div><div><div><div></div></div></div><div><div><div></div></div></div><div><div><div></div></div></div><div><div><div></div></div></div><div><div><div></div></div></div><div><div><div></div></div></div><div><div><div></div></div></div><div><div><div></div></div></div><div><div><div></div></div></div><div><div><div></div></div></div><div><div><div></div></div></div><div><div><div></div></div></div><div><div><div></div></div></div><div><div><div></div></div></div><div><div><div></div></div></div><div><div><div></div></div></div><div><div><div></div></div></div><div><div><div></div></div></div><div><div><div></div></div></div><div><div><div></div></div></div><div><div><div></div></div></div><div><div><div></div></div></div><div><div><div></div></div></div><div><div><div></div></div></div><div><div><div></div></div></div><div><div><div></div></div></div><div><div><div></div></div></div><div><div><div></div></div></div><div><div><div></div></div></div><div><div><div></div></div></div><div><div><div></div></div></div><div><div><div></div></div></div><div><div><div></div></div></div><div><div><div></div></div></div><div><div><div></div></div></div><div><div><div></div></div></div><div><div><div></div></div></div><div><div><div></div></div></div><div><div><div></div></div></div><div><div><div></div></div></div><div><div><div></div></div></div><div><div><div></div></div></div><div><div><div></div></div></div><div><div><div></div></div></div><div><div><div></div></div></div><div><div><div></div></div></div><div><div><div></div></div></div><div><div><div></div></div></div><div><div><div></div></div></div><div><div><div></div></div></div><div><div><div></div></div></div><div><div><div></div></div></div><div><div><div></div></div></div><div><div><div></div></div></div><div><div><div></div></div></div><div><div><div></div></div></div><div><div><div></div></div></div><div><div><div></div></div></div><div><div><div></div></div></div><div><div><div></div></div></div><div><div><div></div></div></div><div><div><div></div></div></div><div><div><div></div></div></div><div><div><div></div></div></div><div><div><div></div></div></div><div><div><div></div></div></div><div><div><div></div></div></div><div><div><div></div></div></div><div><div><div></div></div></div><div><div><div></div></div></div><div><div><div></div></div></div><div><div><div></div></div></div><div><div><div></div></div></div><div><div><div></div></div></div><div><div><div></div></div></div><div><div><div></div></div></div><div><div><div></div></div></div><div><div><div></div></div></div><div><div><div></div></div></div><div><div><div></div></div></div><div><div><div></div></div></div><div><div><div></div></div></div><div><div><div></div></div></div><div><div><div></div></div></div><div><div><div></div></div></div><div><div><div></div></div></div><div><div><div></div></div></div><div><div><div></div></div></div><div><div><div></div></div></div><div><div><div></div></div></div><div><div><div></div></div></div><div><div><div></div></div></div><div><div><div></div></div></div><div><div><div></div></div></div><div><div><div></div></div></div><div><div><div></div></div></div><div><div><div></div></div></div><div><div><div></div></div></div><div><div><div></div></div></div><div><div><div></div></div></div><div><div><div></div></div></div><div><div><div></div></div></div><div><div><div></div></div></div><div><div><div></div></div></div><div><div><div></div></div></div><div><div><div></div></div></div><div><div><div></div></div></div><div><div><div></div></div></div><div><div><div></div></div></div><div><div><div></div></div></div><div><div><div></div></div></div><div><div><div></div></div></div><div><div><div></div></div></div><div><div><div></div></div></div><div><div><div></div></div></div><div><div><div></div></div></div><div><div><div></div></div></div><div><div><div></div></div></div><div><div><div></div></div></div><div><div><div></div></div></div><div><div><div></div></div></div><div><div><div></div></div></div><div><div><div></div></div></div><div><div><div></div></div></div><div><div><div></div></div></div><div><div><div></div></div></div><div><div><div></div></div></div><div><div><div></div></div></div><div><div><div></div></div></div><div><div><div></div></div></div><div><div><div></div></div></div><div><div><div></div></div></div><div><div><div></div></div></div><div><div><div></div></div></div><div><div><div></div></div></div><div><div><div></div></div></div><div><div><div></div></div></div><div><div><div></div></div></div><div><div><div></div></div></div><div><div><div></div></div></div><div><div><div></div></div></div><div><div><div></div></div></div><div><div><div></div></div></div><div><div><div></div></div></div><div><div><div></div></div></div><div><div><div></div></div></div><div><div><div></div></div></div><div><div><div></div></div></div><div><div><div></div></div></div><div><div><div></div></div></div><div><div><div></div></div></div><div><div><div></div></div></div><div><div><div></div></div></div><div><div><div></div></div></div><div><div><div></div></div></div><div><div><div></div></div></div><div><div><div></div></div></div><div><div><div></div></div></div><div><div><div></div></div></div><div><div><div></div></div></div><div><div><div></div></div></div><div><div><div></div></div></div><div><div><div></div></div></div><div><div><div></div></div></div><div><div><div></div></div></div><div><div><div></div></div></div><div><div><div></div></div></div><div><div><div></div></div></div><div><div><div></div></div></div><div><div><div></div></div></div><div><div><div></div></div></div><div><div><div></div></div></div><div><div><div></div></div></div><div><div><div></div></div></div></div></div></div> |                                                                                                                                                                                                                                                                                                                                                                                                                                                                                                                                                                                                                                                                                                                                                                                                                                                                                                                                                                                                                                                                                                                                                                                                                                                                                                                                                                                                                                                                                                                                                                                                                                                                                                                                                                                                                                                                                                                                                                                                                                                                                                                                                                                                                                                                                                                                                                                                                                                                                                                                                                                                                                                                                                                                                                                                                                                                                                                                                                                                                                                                                                                                                                                                                                                                                                                                                                                                                                                                                                                                                                                                                                                                                                                                                                                                                                                                                                                                                                                                                                                                                                                                                                                                                                                                                                                                                                                                                                                                                                                                                                                                                                                                                                                                                                                                                                                                                                                                                                                                                                                                                                                                                                                                                                                                                                                                                                                                                                                                                                                                                                                                                                                                                                                                                                                                                                                                                                                                                                                                                                                                                                                                                                                                                                                                                                                                                                                                                                                                                                                                                                                                                                                                                                                                                                                                                                                                                                                                                                                                                                                                                                                                                                                                                                                                                                                                                                                                                                                                                                                                                                                                                                                                                                                                                                                                                                                                                                                                                                                                                                                                                                                                                                                                                                                                                                                                                                                                                                                                                                                                                                                                                                                                                                                                                                                                                                                                                                                                                                                                                                                                                                                                                                                                                                                                                                                                                                                                                                                                                                                                                                                                                                                                                                                                                                                                                                                                                                                                                                                                                                                                                                                                                                                                                                                                                                                                                                                                                                                                                                                                                                                                                                                                                                                                                                                                                                                                                                                                                                                                                                                                                                                                                                                                                                                                                                                                                                                                                                                                                                                                                                                                                                                                                                                                                                                                                                                                                                                                                                                                                                                                                                                                                                                                                                                                                                                                                                                                                                                                                                                                                                                                                                                                                                                                                     |                                                                                                                                                                                                                                                                                                                                                                                                                                                                                                                                                                                                                                                                                                                                                                                                                                                                                                                                                                                                                                                                                                                                                                                                                                                                                                                                                                                                                                                                                                                                                                                                                                                                                                                                                                                                                                                                                                                                                                                                                                                                                                                                                                                                                                                                                                                                                                                                                                                                                                                                                                                                                                                                                                                                                                                                                                                                                                                                                                                                                                                                                                                                                                                                                                                                                                                                                                                                                                                                                                                                                                                                                                                                                                                                                                                                                                                                                                                                                                                                                                                                                                                                                                                                                                                                                                                                                                                                                                                                                                                                                                                                                                                                                                                                                                                                                                                                                                                                                                                                                                                                                                                                                                                                                                                                                                                                                                                                                                                                                                                                                                                                                                                                                                                                                                                                                                                                                                                                                                                                                                                                                                                                                                                                                                                                                                                                                                                                                                                                                                                                                                                                                                                                                                                                                                                                                                                                                                                                                                                                                                                                                                                                                                                                                                                                                                                                                                                                                                                                                                                                                                                                                                                                                                                                                                                                                                                                                                                                                                                                                                                                                                                                                                                                                                                                                                                                                                                                                                                                                                                                                                                                                                                                                                                                                                                                                                                                                                                                                                                                                                                                                                                                                                                                                                                                                                                                                                                                                                                                                                                                                                                                                                                                                                                                                                                                                                                                                                                                                                                                                                                                                                                                                                                                                                                                                                                                                                                                                                                                                                                                                                                                                                                                                                                                                                                                                                                                                                                                                                                                                                                                                                                                                                                                                                                                                                                                                                                                                                                                                                                                                                                                                                                                                                                                                                                                                                                                                                                                                                                                                                                                                                                                                                                                                                                                                                                                                                                                                                                                                                                                                                                                                                                                                                                    |
