# Supplementary material for: Multi-Omics Reveals the Effect of Population Density on the Phenotype, Transcriptome and Metabolome of Mythimna separata
Source: MDPI journal article supplement (doi:10.3390/insects14010068), 2023-01-10
Supplement: s1 [file s1]

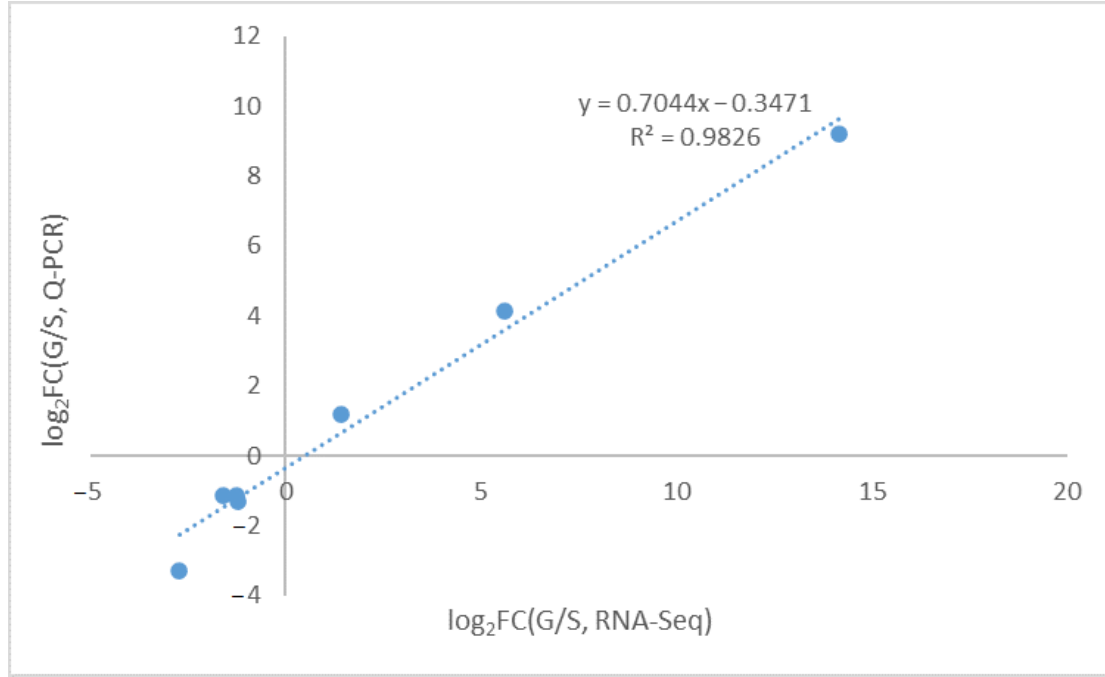

**Figure S1.** Comparison of RNA-Seq and qPCR results. The horizontal axis is the result of RNA-Seq, and the vertical axis is the result of qPCR. The number on the coordinate axis represents the log<sub>2</sub> value of each gene expression ratio of gregarious and solitary armyworms.

| Gene                  | log <sub>2</sub> FC(G/S, RNA-Seq) | log <sub>2</sub> FC(G/S, qPCR) |
|-----------------------|-----------------------------------|--------------------------------|
| TRINITY_DN11213_c0_g4 | -1.23264                          | -1.29826                       |
| TRINITY_DN1026_c5_g1  | -1.61120                          | -1.13386                       |
| TRINITY_DN11743_c0_g1 | -1.26588                          | -1.12059                       |
| TRINITY_DN876_c3_g1   | -2.72646                          | -3.29073                       |
| TRINITY_DN2583_c0_g1  | 1.39784                           | 1.16565                        |
| TRINITY_DN1017_c0_g1  | 5.61830                           | 4.13641                        |
| TRINITY_DN1037_c0_g2  | 14.1709                           | 9.21950                        |

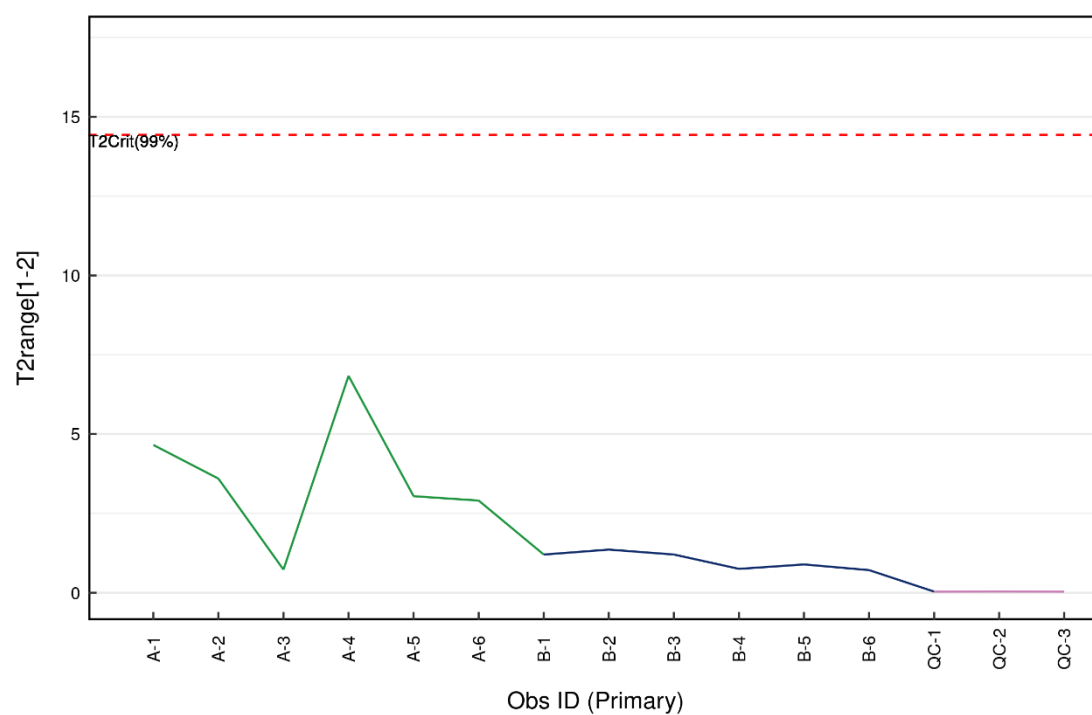

**Figure S2A.** Hotelling T2 range line plot of negative ion mode population samples.

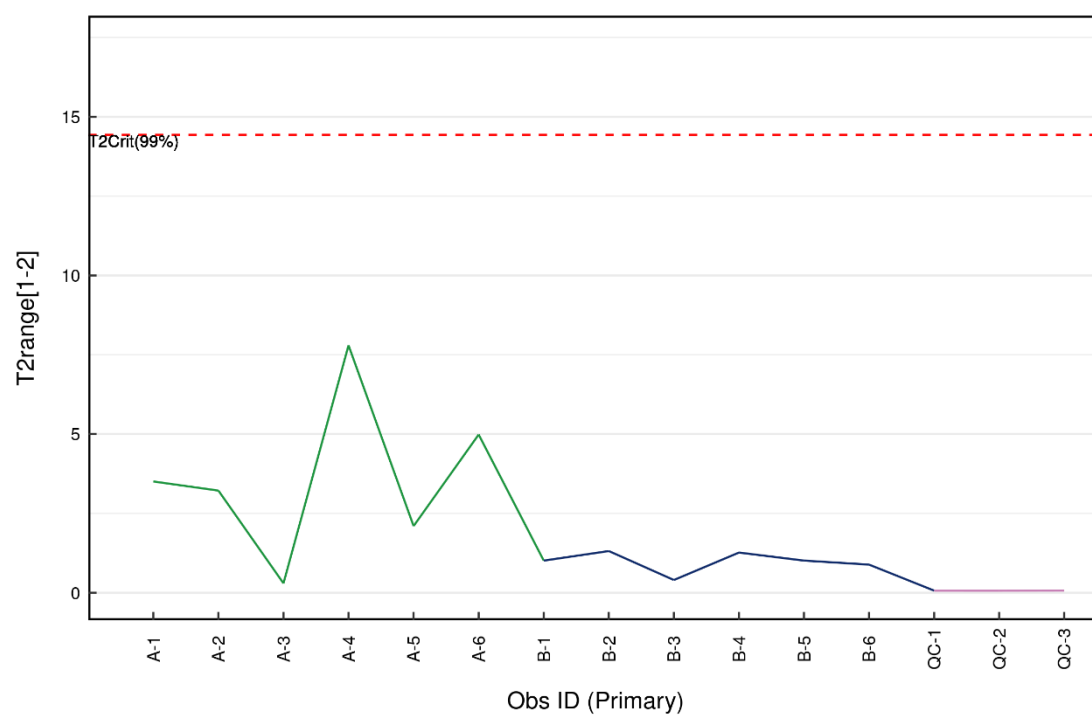

**Figure S2B.** Hotelling T2 range line plot of positive ion mode population samples.

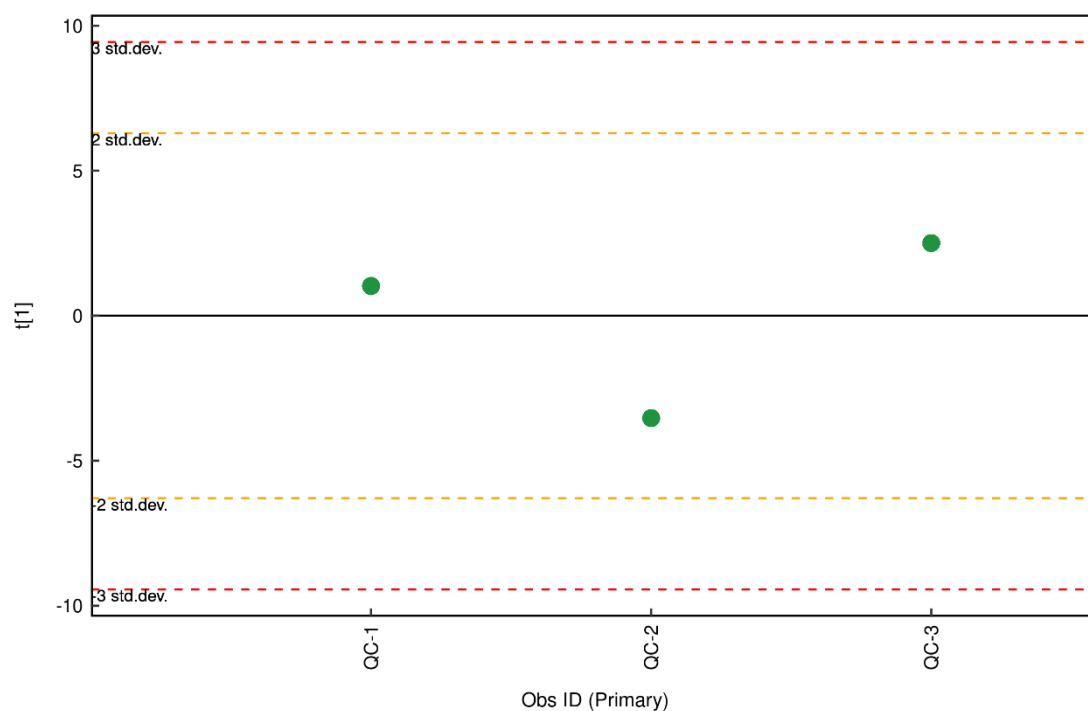

**Figure S2C.** MCC map of QC samples in negative ion mode.

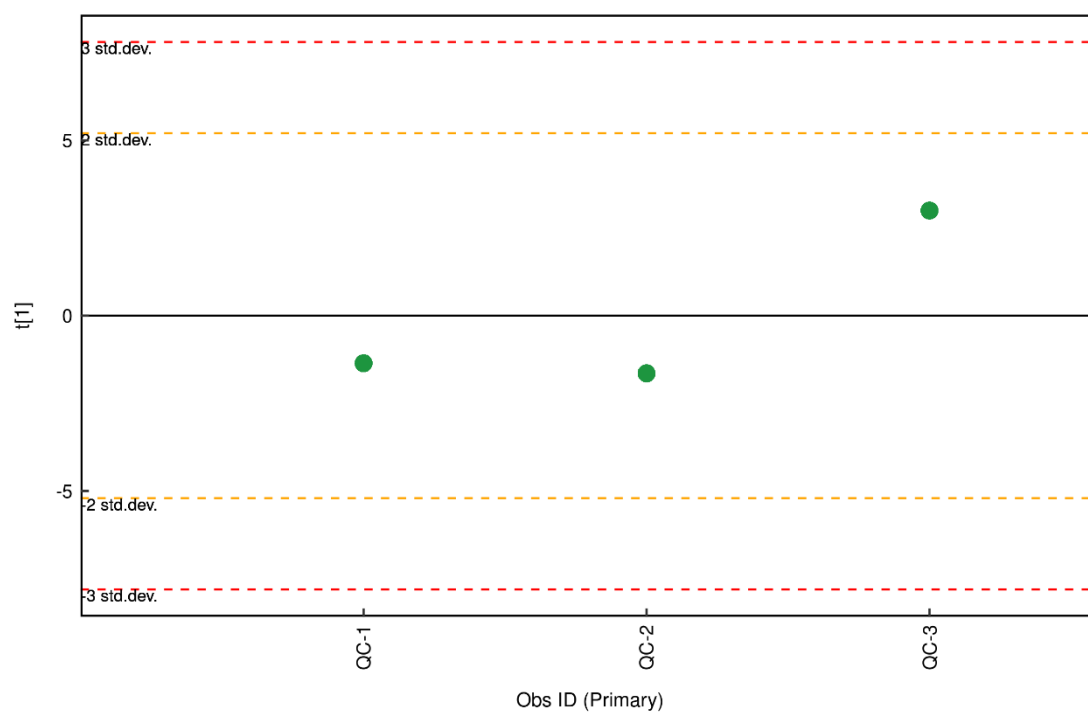

**Figure S2D.** MCC map of QC samples in positive ion mode.

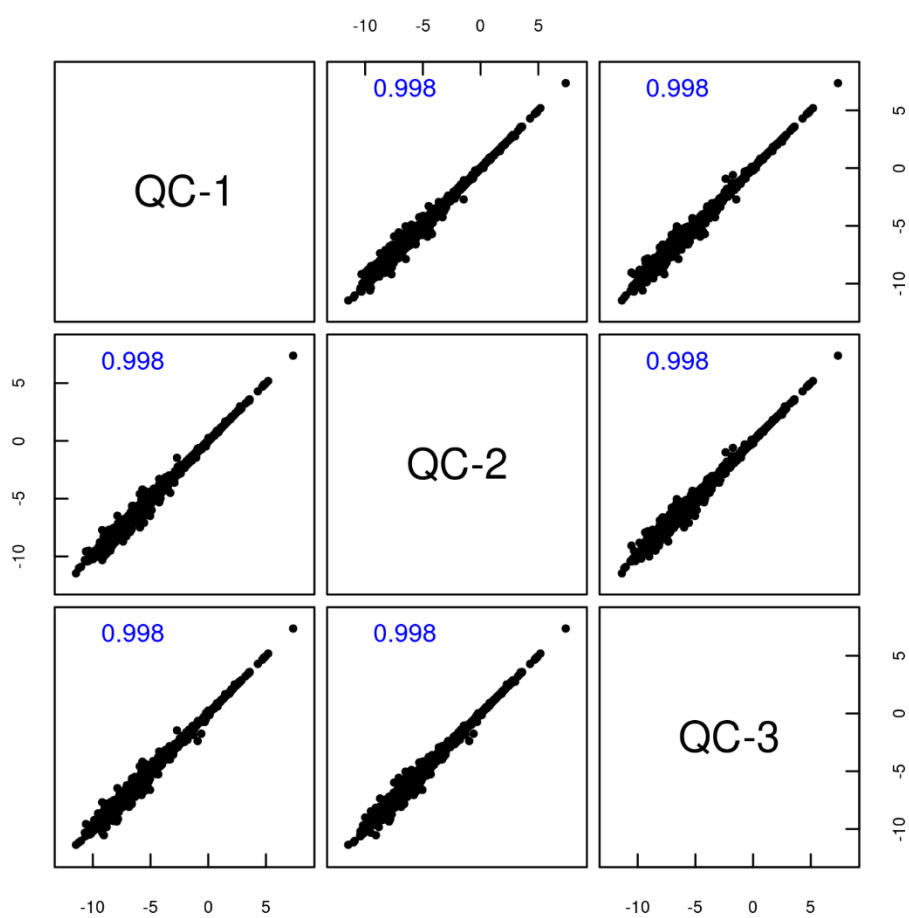

**Figure S2E.** Correlation map of QC samples in negative ion mode.

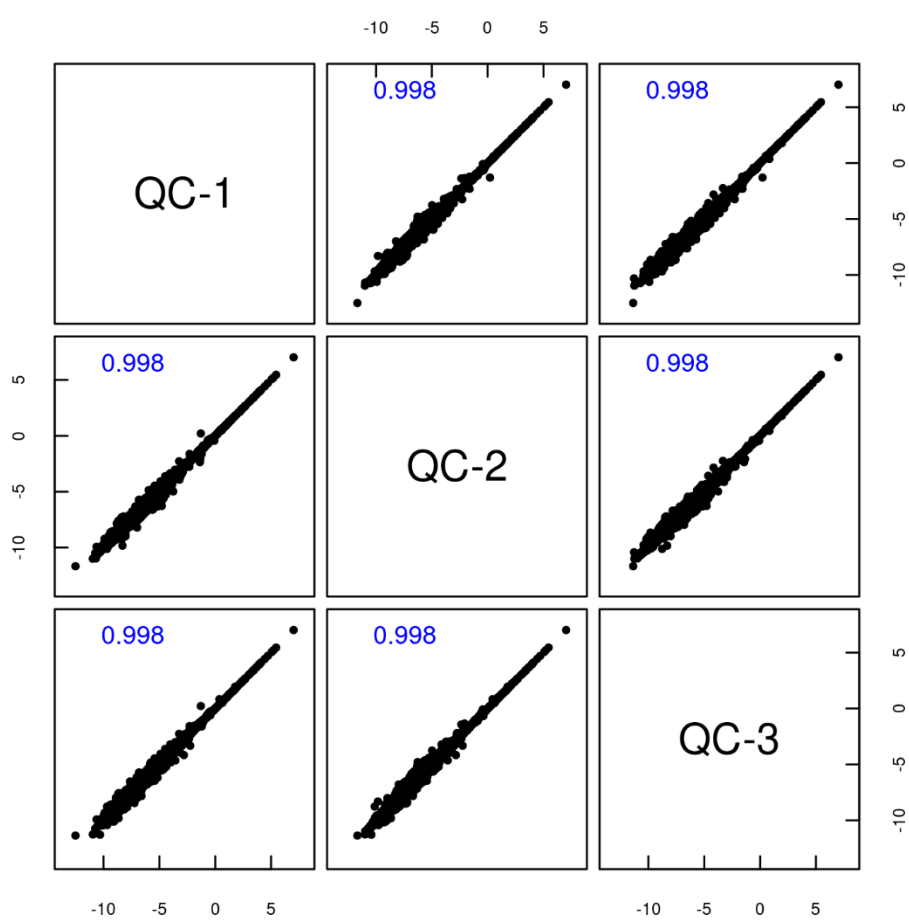

**Figure S2F.** Correlation map of QC samples in positive ion mode.

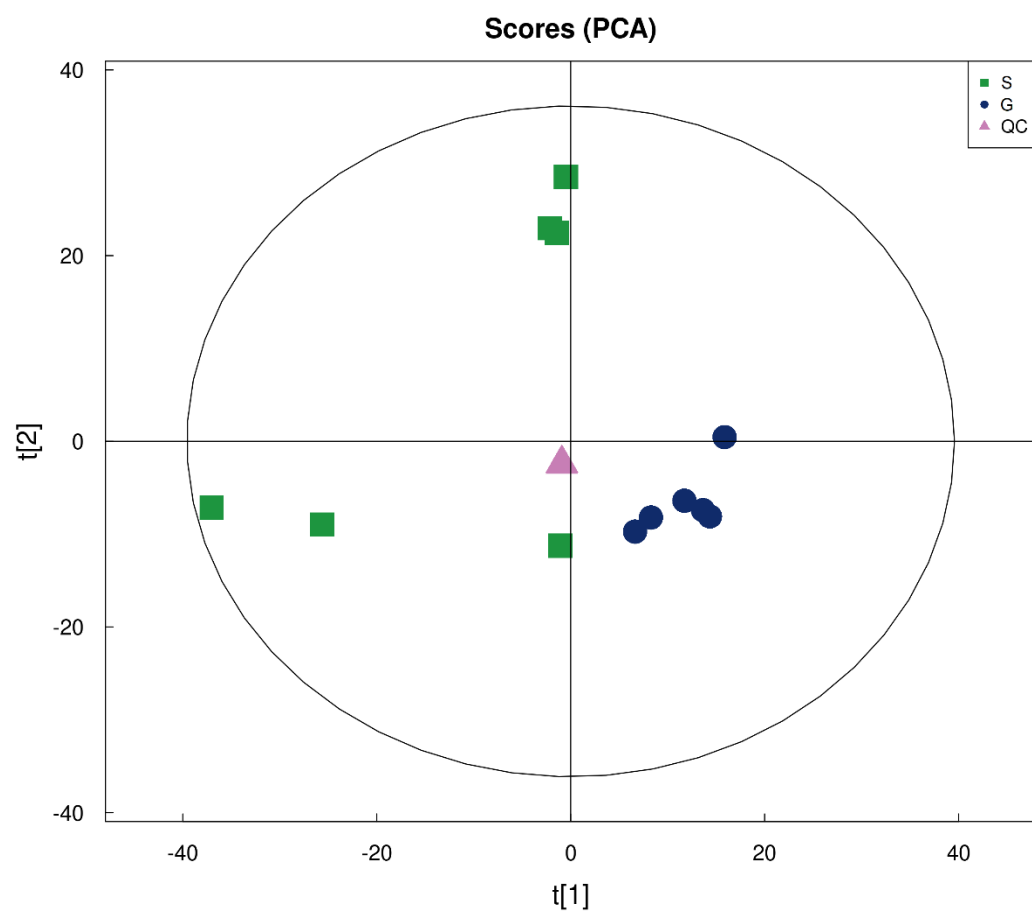

**Figure S2G.** PCA analysis of negative ion mode population samples.

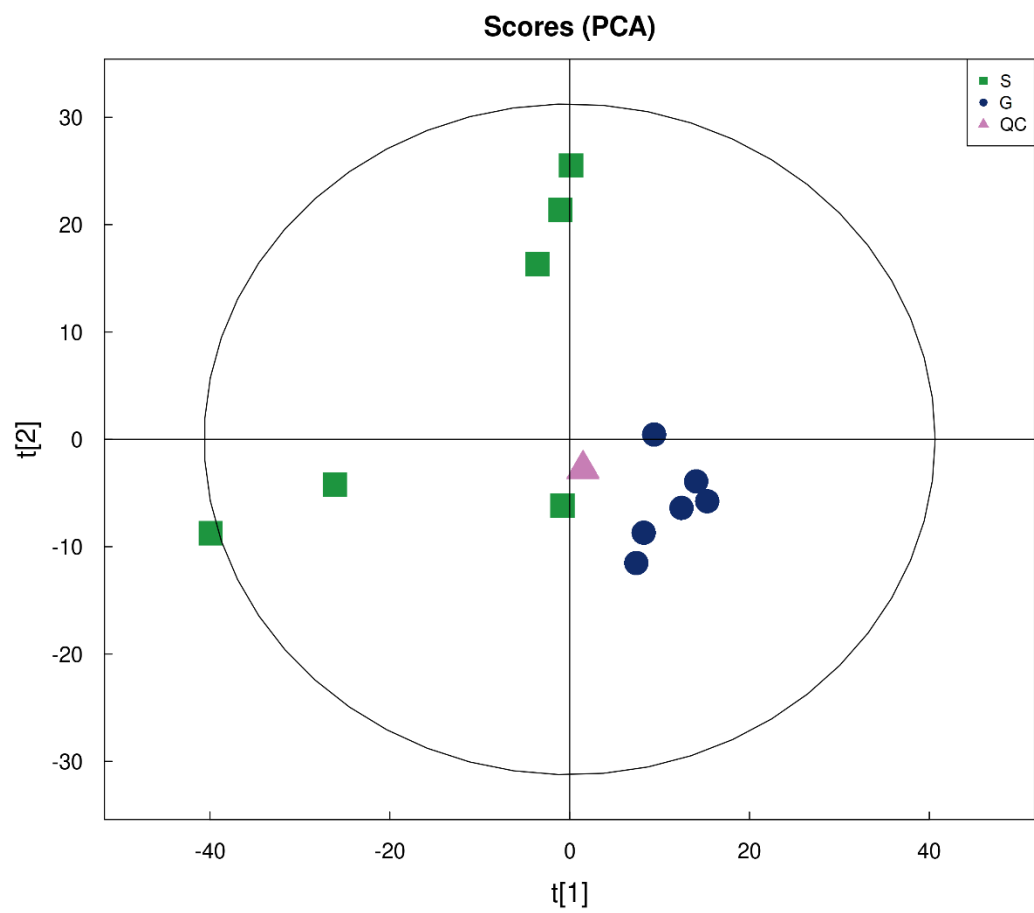

**Figure S2H.** PCA analysis of positive ion mode population samples.

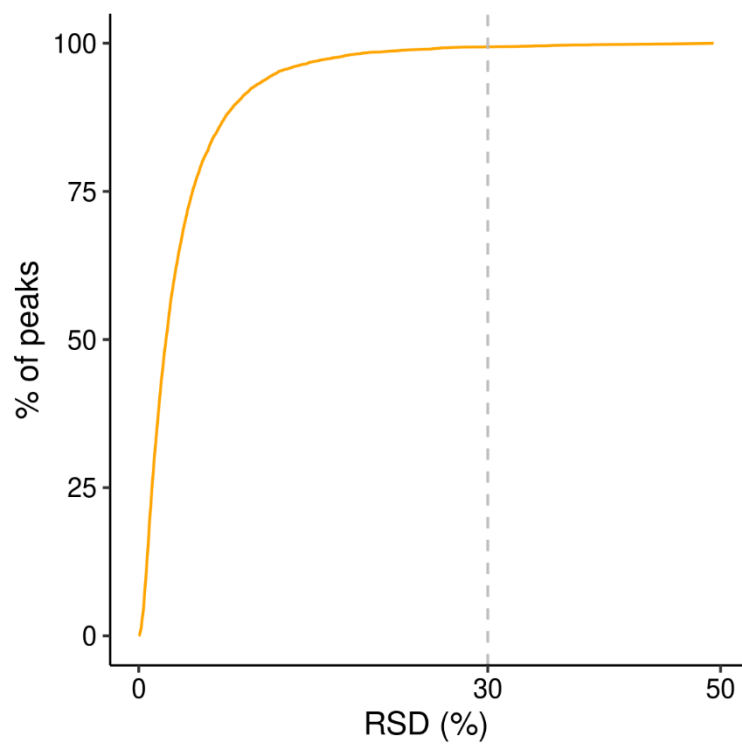

**Figure S2I.** Relative standard deviation of QC samples in negative ion mode.

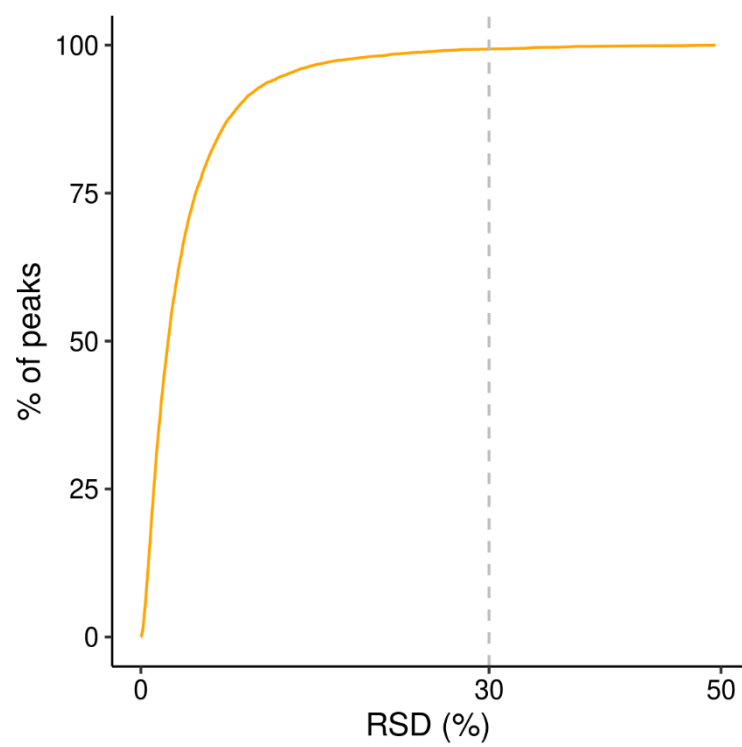

**Figure S2J.** Relative standard deviation of QC samples in positive ion mode.
