# Supplementary material for: Multi-Omics Reveals the Effect of Population Density on the Phenotype, Transcriptome and Metabolome of Mythimna separata
Source: Insects. 2023 Jan 10;14(1):68. doi: 10.3390/insects14010068 (PMC9861010; doi:10.3390/insects14010068)
Supplement: Supplementary file 1 [file insects-14-00068-s001.zip]

Archive with 8 entries (8 files):
- Figure S1 Figure S2 - conversion.pdf
- Figure S3.jpeg
- Table S1.pdf
- Table S2.xltx
- Table S3.pdf
- Table S4.xlsx
- Table S5.xlsx
- Table S6.xlsx
