# Supplementary material for: Multi-Omics Reveals the Effect of Population Density on the Phenotype, Transcriptome and Metabolome of Mythimna separata
Source: Insects. 2023 Jan 10;14(1):68. doi: 10.3390/insects14010068 (PMC9861010; doi:10.3390/insects14010068)
Supplement: Supplementary file 1 [file insects-14-00068-s001.zip › Table S2.xltx]

## Sheet: Table S2 transcriptomic_unigene
unigene_id	S-1	S-2	S-3	G-1	G-2	G-3	unigene_length	NR_tophit_name	NR_tophit_description	NR_tophit_similarity	Swissprot_tophit_name	Swissprot_tophit_description	Swissprot_tophit_similarity	String_tophit_name	String_tophit_description	String_tophit_similarity	COG	KOG	NOG	GO_molecular_function	GO_biological_process	GO_cellular_component	KEGG_gene_id	KEGG_gene_name	KEGG_pathway	CDS	CDS_type	Pfam
TRINITY_DN0_c0_g1	6.57221	9.8278	4.40075	5.25049	0	15.8636	4708	PCG76395.1	PCG76395.1 hypothetical protein B5V51_9649 [Heliothis virescens]	95.4	_	_	_	_	_	_	_	_	_	_	_	_	_	_	_	m.921|TRINITY_DN0_c0_g1:173-2146(+)	complete	PF01061.21|ABC2_membrane|ABC-2 type transporter|TRINITY_DN0_c0_g1_i43|m.921:384-592;PF00005.24|ABC_tran|ABC transporter|TRINITY_DN0_c0_g1_i43|m.921:91-236
TRINITY_DN0_c0_g2	32.0214	40.3032	28.616	29.5332	47.0067	50.5855	3950	XP_021196133.1	XP_021196133.1 eukaryotic translation initiation factor 3 subunit A-like [Helicoverpa armigera]	89.7	sp|Q7PGE8|EIF3A_ANOGA	sp|Q7PGE8|EIF3A_ANOGA Eukaryotic translation initiation factor 3 subunit A OS=Anopheles gambiae OX=7165 GN=eIF3-S10 PE=3 SV=5	76.6	_	_	_	_	_	_	GO:0001732|formation of cytoplasmic translation initiation complex;GO:0002188|translation reinitiation	GO:0016282|eukaryotic 43S preinitiation complex;GO:0033290|eukaryotic 48S preinitiation complex;GO:0043614|multi-eIF complex;GO:0071540|eukaryotic translation initiation factor 3 complex, eIF3e;GO:0071541|eukaryotic translation initiation factor 3 complex, eIF3m	GO:0003729|mRNA binding;GO:0003743|translation initiation factor activity	ko:K03254	EIF3A	path:ko03013	m.925|TRINITY_DN0_c0_g2:2829-3818(+);m.924|TRINITY_DN0_c0_g2:101-3604(+)	complete;complete	PF01399.24|PCI|PCI domain|TRINITY_DN0_c0_g2_i1|m.924:406-494
TRINITY_DN0_c0_g3	6.09521	6.44688	2.57673	6.6288	5.10954	5.57372	8772	RNA35416.1	RNA35416.1 urease accessory [Brachionus plicatilis]	79.5	_	_	_	_	_	_	_	_	_	_	_	_	_	_	_	_	_	_
TRINITY_DN0_c10_g1	2.53447	2.8112	1.87263	0	3.58213	1.23153	1003	KAF9408715.1	KAF9408715.1 hypothetical protein HW555_011692 [Spodoptera exigua]	98.7	_	_	_	_	_	_	_	_	_	_	_	_	_	_	_	_	_	_
TRINITY_DN0_c110_g1	0	0	0	0	0	1.10684	237	_	_	_	_	_	_	_	_	_	_	_	_	_	_	_	_	_	_	_	_	_
TRINITY_DN0_c11_g1	0.514521	114.778	3.40332	0.750579	79.7829	311.127	494	_	_	_	_	_	_	_	_	_	_	_	_	_	_	_	_	_	_	_	_	_
TRINITY_DN0_c121_g1	0	0	0	0	0	0	203	KPJ06866.1	KPJ06866.1 hypothetical protein RR48_11365 [Papilio machaon]	73.2	_	_	_	_	_	_	_	_	_	_	_	_	_	_	_	_	_	_
TRINITY_DN0_c126_g1	15.3145	15.8915	11.3458	8.96065	8.35892	7.82556	241	_	_	_	_	_	_	_	_	_	_	_	_	_	_	_	_	_	_	_	_	_
TRINITY_DN0_c12_g1	0.393668	0.224771	0	0	0	0	1436	_	_	_	_	_	_	_	_	_	_	_	_	_	_	_	_	_	_	_	_	_
TRINITY_DN0_c131_g1	14.0389	42.5951	23.1718	30.2503	1.73731	24.2244	233	_	_	_	_	_	_	_	_	_	_	_	_	_	_	_	_	_	_	_	_	_
TRINITY_DN0_c135_g1	12.6499	27.1857	16.7336	19.4747	14.9752	21.8556	1096	KAF9801636.1	KAF9801636.1 hypothetical protein SFRURICE_012208 [Spodoptera frugiperda]	95.2	_	_	_	_	_	_	_	_	_	_	_	_	ko:K00799	GST, gst	path:ko00480;path:ko00980;path:ko00982;path:ko01524;path:ko05204;path:ko05418	m.1009|TRINITY_DN0_c135_g1:327-1013(+)	complete	PF02798.17|GST_N|Glutathione S-transferase, N-terminal domain|TRINITY_DN0_c135_g1_i1|m.1009:2-76;PF13417.3|GST_N_3|Glutathione S-transferase, N-terminal domain|TRINITY_DN0_c135_g1_i1|m.1009:27-76;PF00043.22|GST_C|Glutathione S-transferase, C-terminal domain|TRINITY_DN0_c135_g1_i1|m.1009:133-200
TRINITY_DN0_c13_g1	0.327343	0.567517	1.0707	0.38432	0.670402	0.672579	1163	_	_	_	_	_	_	_	_	_	_	_	_	_	_	_	_	_	_	_	_	_
TRINITY_DN0_c147_g1	7.33481	4.81988	4.37342	4.60864	7.64798	4.49695	281	_	_	_	_	_	_	_	_	_	_	_	_	_	_	_	_	_	_	_	_	_
TRINITY_DN0_c14_g1	2.38912	0.965434	0.406732	0	0	0	333	_	_	_	_	_	_	_	_	_	_	_	_	_	_	_	_	_	_	_	_	_
TRINITY_DN0_c14_g2	0.788875	0.343383	0.176806	1.31358	0.451324	0.279646	1162	KAF9806282.1	KAF9806282.1 hypothetical protein SFRURICE_008266 [Spodoptera frugiperda]	70.1	_	_	_	_	_	_	_	_	_	_	_	_	_	_	_	_	_	_
TRINITY_DN0_c15_g1	3.55357	2.42296	2.22126	2.65264	3.2987	1.14118	1387	PCG68907.1	PCG68907.1 hypothetical protein B5V51_4748 [Heliothis virescens]	89.4	sp|Q9V576|WUN_DROME	sp|Q9V576|WUN_DROME Putative phosphatidate phosphatase OS=Drosophila melanogaster OX=7227 GN=wun PE=1 SV=2	48.7	_	_	_	_	_	_	GO:0006644|phospholipid metabolic process;GO:0007165|signal transduction;GO:0007280|pole cell migration;GO:0007424|open tracheal system development;GO:0008354|germ cell migration;GO:0019991|septate junction assembly;GO:0035233|germ cell repulsion;GO:0035234|ectopic germ cell programmed cell death;GO:0045824|negative regulation of innate immune response;GO:0046839|phospholipid dephosphorylation;GO…	GO:0005887|integral component of plasma membrane;GO:0005918|septate junction;GO:0045177|apical part of cell	GO:0008195|phosphatidate phosphatase activity;GO:0016791|phosphatase activity;GO:0042577|lipid phosphatase activity	ko:K01080	PPAP2	path:ko00561;path:ko00564;path:ko00565;path:ko00600;path:ko01100;path:ko01110;path:ko04072;path:ko04666;path:ko04975;path:ko05231	m.999|TRINITY_DN0_c15_g1:169-1173(+)	complete	PF01569.18|PAP2|PAP2 superfamily|TRINITY_DN0_c15_g1_i2|m.999:139-286
TRINITY_DN0_c162_g1	3.45449	4.77718	5.1282	7.06736	3.72459	0.924395	203	_	_	_	_	_	_	_	_	_	_	_	_	_	_	_	_	_	_	_	_	_
TRINITY_DN0_c162_g2	0	0	0	0	0.571882	0	250	_	_	_	_	_	_	_	_	_	_	_	_	_	_	_	_	_	_	_	_	_
TRINITY_DN0_c166_g1	0	0	0	0	0	0	214	PZC77920.1	PZC77920.1 hypothetical protein B5X24_HaOG202801 [Helicoverpa armigera]	85.2	_	_	_	_	_	_	_	_	_	_	_	_	_	_	_	_	_	_
TRINITY_DN0_c16_g1	10.6826	6.71359	5.28569	3.71485	12.9735	7.54265	1235	XP_032513441.1	XP_032513441.1 craniofacial development protein 2-like [Danaus plexippus plexippus]	88.2	_	_	_	_	_	_	_	_	_	_	_	_	_	_	_	m.1002|TRINITY_DN0_c16_g1:300-1235(+)	3prime_partial	PF03372.20|Exo_endo_phos|Endonuclease/Exonuclease/phosphatase family|TRINITY_DN0_c16_g1_i4|m.1002:54-261
TRINITY_DN0_c16_g2	1.21957	0.984206	0.672303	0.729614	2.14463	0.49526	554	_	_	_	_	_	_	_	_	_	_	_	_	_	_	_	_	_	_	_	_	_
TRINITY_DN0_c170_g2	0	1.59239	0	1.26303	0	0.686561	203	_	_	_	_	_	_	_	_	_	_	_	_	_	_	_	_	_	_	_	_	_
TRINITY_DN0_c174_g1	0	0	0	0	0	0	205	_	_	_	_	_	_	_	_	_	_	_	_	_	_	_	_	_	_	_	_	_
TRINITY_DN0_c174_g2	2.41674	4.00021	2.84219	4.15128	1.92695	3.64291	1535	_	_	_	_	_	_	_	_	_	_	_	_	_	_	_	_	_	_	_	_	_
TRINITY_DN0_c17_g1	0	0.779538	0	0	0	0.670655	206	_	_	_	_	_	_	_	_	_	_	_	_	_	_	_	_	_	_	_	_	_
TRINITY_DN0_c17_g2	9.52267	8.91894	6.64426	8.1897	10.3428	7.89045	2297	XP_021189069.1	XP_021189069.1 RING finger and transmembrane domain-containing protein 2 [Helicoverpa armigera]	94.5	_	_	_	_	_	_	_	_	_	_	_	_	_	_	_	m.1004|TRINITY_DN0_c17_g2:140-1537(+)	complete	PF13639.3|zf-RING_2|Ring finger domain|TRINITY_DN0_c17_g2_i1|m.1004:404-444;PF13445.3|zf-RING_UBOX|RING-type zinc-finger|TRINITY_DN0_c17_g2_i1|m.1004:406-441;PF13920.3|zf-C3HC4_3|Zinc finger, C3HC4 type (RING finger)|TRINITY_DN0_c17_g2_i1|m.1004:404-448;PF13923.3|zf-C3HC4_2|Zinc finger, C3HC4 type (RING finger)|TRINITY_DN0_c17_g2_i1|m.1004:406-443;PF00097.22|zf-C3HC4|Zinc finger, C3HC4 type (RING…
TRINITY_DN0_c183_g1	0	0	0	0	0.458788	0	287	KAF9421627.1	KAF9421627.1 hypothetical protein HW555_002560 [Spodoptera exigua]	72.6	_	_	_	_	_	_	_	_	_	_	_	_	_	_	_	_	_	_
TRINITY_DN0_c18_g1	8.24464	13.6916	7.86102	27.2069	13.1751	21.6479	483	_	_	_	_	_	_	_	_	_	_	_	_	_	_	_	_	_	_	_	_	_
TRINITY_DN0_c194_g1	3.04317	0	0	0	0	0	222	_	_	_	_	_	_	_	_	_	_	_	_	_	_	_	_	_	_	_	_	_
TRINITY_DN0_c19_g1	0	0	0	0.883003	0	0	386	_	_	_	_	_	_	_	_	_	_	_	_	_	_	_	_	_	_	_	_	_
TRINITY_DN0_c1_g1	0.544907	0	0	0.269983	0	0	3109	_	_	_	_	_	_	_	_	_	_	_	_	_	_	_	_	_	_	m.931|TRINITY_DN0_c1_g1:627-1019(+)	complete	_
TRINITY_DN0_c1_g2	8.39351	4.96914	6.7576	6.16913	8.47444	6.79039	1844	_	_	_	_	_	_	_	_	_	_	_	_	_	_	_	_	_	_	_	_	_
TRINITY_DN0_c1_g3	5.90195	1.86846	4.98653	5.08723	7.47636	4.12629	384	_	_	_	_	_	_	_	_	_	_	_	_	_	_	_	_	_	_	_	_	_
TRINITY_DN0_c1_g4	2.18955	1.3108	1.21724	2.05129	2.40121	1.04304	987	_	_	_	_	_	_	_	_	_	_	_	_	_	_	_	_	_	_	_	_	_
TRINITY_DN0_c1_g5	4.28246	5.78757	2.985	2.05726	3.09772	3.10086	2413	XP_035448659.1	XP_035448659.1 vacuole membrane protein 1-like isoform X1 [Spodoptera frugiperda]	89.9	sp|Q9XWU8|VMP1_CAEEL	sp|Q9XWU8|VMP1_CAEEL Ectopic P granules protein 3 OS=Caenorhabditis elegans OX=6239 GN=epg-3 PE=2 SV=2	64	_	_	_	_	_	_	GO:0006914|autophagy;GO:0007030|Golgi organization;GO:0016236|macroautophagy;GO:1902902|negative regulation of autophagosome assembly	GO:0005737|cytoplasm;GO:0005783|endoplasmic reticulum;GO:0012505|endomembrane system;GO:0016020|membrane;GO:0016021|integral component of membrane	_	ko:K21248	VMP1	path:ko04140	m.941|TRINITY_DN0_c1_g5:336-1403(+)	complete	_
TRINITY_DN0_c202_g1	0	0	0	0	0	0	521	_	_	_	_	_	_	_	_	_	_	_	_	_	_	_	_	_	_	_	_	_
TRINITY_DN0_c206_g1	0	0	0	0	0	0	250	_	_	_	_	_	_	_	_	_	_	_	_	_	_	_	_	_	_	_	_	_
TRINITY_DN0_c20_g1	1.13261	0.983261	2.99628	0.604354	2.2037	0.632332	681	KAF9423670.1	KAF9423670.1 hypothetical protein HW555_000996 [Spodoptera exigua]	91.1	_	_	_	_	_	_	_	_	_	_	_	_	_	_	_	_	_	_
TRINITY_DN0_c21_g1	29.0505	36.0585	23.6518	21.9233	25.6945	12.8545	705	_	_	_	_	_	_	_	_	_	_	_	_	_	_	_	_	_	_	_	_	_
TRINITY_DN0_c22_g1	7.94945	11.053	4.87404	5.20559	9.8346	2.44076	357	_	_	_	_	_	_	_	_	_	_	_	_	_	_	_	_	_	_	_	_	_
TRINITY_DN0_c233_g1	0	0	0	0	0	0	230	_	_	_	_	_	_	_	_	_	_	_	_	_	_	_	_	_	_	_	_	_
TRINITY_DN0_c234_g1	0	1.5387	0	0.604865	2.84478	0	208	_	_	_	_	_	_	_	_	_	_	_	_	_	_	_	_	_	_	_	_	_
TRINITY_DN0_c23_g1	1.16098	2.10015	1.50145	5.47201	3.45182	4.51743	1948	XP_035437537.1	XP_035437537.1 uncharacterized protein LOC118267575 [Spodoptera frugiperda]	90.4	_	_	_	_	_	_	_	_	_	_	_	_	_	_	_	m.1007|TRINITY_DN0_c23_g1:121-687(+)	complete	PF15860.2|DUF4728|Domain of unknown function (DUF4728)|TRINITY_DN0_c23_g1_i3|m.1007:76-164
TRINITY_DN0_c245_g1	0	0	0	0	0	0	225	_	_	_	_	_	_	_	_	_	_	_	_	_	_	_	_	_	_	_	_	_
TRINITY_DN0_c24_g1	1.37687	2.17179	1.39469	3.89069	0.781785	2.36377	546	_	_	_	_	_	_	_	_	_	_	_	_	_	_	_	_	_	_	_	_	_
TRINITY_DN0_c251_g1	0	0	0	0	0	0	228	_	_	_	_	_	_	_	_	_	_	_	_	_	_	_	_	_	_	_	_	_
TRINITY_DN0_c251_g2	9.90824	15.4698	6.01141	13.8756	11.7131	13.5213	445	_	_	_	_	_	_	_	_	_	_	_	_	_	_	_	_	_	_	_	_	_
TRINITY_DN0_c259_g1	0	0	0	0	0	0	238	_	_	_	_	_	_	_	_	_	_	_	_	_	_	_	_	_	_	_	_	_
TRINITY_DN0_c270_g1	0.661165	0	1.55335	0	0	0.520019	250	_	_	_	_	_	_	_	_	_	_	_	_	_	_	_	_	_	_	_	_	_
TRINITY_DN0_c273_g1	3.2425	0	1.76773	2.95826	4.50549	0	288	_	_	_	_	_	_	_	_	_	_	_	_	_	_	_	_	_	_	_	_	_
TRINITY_DN0_c279_g1	0	19.75	0	9.90368	5.87305	0	262	_	_	_	_	_	_	_	_	_	_	_	_	_	_	_	_	_	_	_	_	_
TRINITY_DN0_c289_g1	1.5552	2.89448	8.54582	5.5922	8.75251	3.08504	218	_	_	_	_	_	_	_	_	_	_	_	_	_	_	_	_	_	_	_	_	_
TRINITY_DN0_c28_g1	2.53966	4.11278	5.26804	4.77217	5.78568	4.17077	497	_	_	_	_	_	_	_	_	_	_	_	_	_	_	_	_	_	_	_	_	_
TRINITY_DN0_c2_g1	1.17751	1.69864	0.752682	1.42865	1.38738	2.99305	3623	XP_021198022.1	XP_021198022.1 uncharacterized protein LOC110381914 [Helicoverpa armigera]	73.1	_	_	_	_	_	_	_	_	_	_	_	_	_	_	_	m.943|TRINITY_DN0_c2_g1:144-2453(+)	complete	PF12796.4|Ank_2|Ankyrin repeats (3 copies)|TRINITY_DN0_c2_g1_i9|m.943:462-563
TRINITY_DN0_c2_g2	12.5649	6.86105	8.53082	3.4614	8.49281	2.17652	1848	_	_	_	_	_	_	_	_	_	_	_	_	_	_	_	_	_	_	_	_	_
TRINITY_DN0_c2_g3	6.31241	14.942	10.3653	15.0556	7.24899	12.3358	471	_	_	_	_	_	_	_	_	_	_	_	_	_	_	_	_	_	_	_	_	_
TRINITY_DN0_c312_g1	0	0	0	0	0	0	203	_	_	_	_	_	_	_	_	_	_	_	_	_	_	_	_	_	_	_	_	_
TRINITY_DN0_c326_g1	0	0	0.917922	0	0.661748	0	221	_	_	_	_	_	_	_	_	_	_	_	_	_	_	_	_	_	_	_	_	_
TRINITY_DN0_c328_g1	0.680696	0	2.41554	0	0	0	244	_	_	_	_	_	_	_	_	_	_	_	_	_	_	_	_	_	_	_	_	_
TRINITY_DN0_c32_g1	24.3156	28.3925	21.134	14.3509	10.1941	11.5349	2412	_	_	_	_	_	_	_	_	_	_	_	_	_	_	_	_	_	_	_	_	_
TRINITY_DN0_c331_g1	1.91897	0.584959	0.695346	0.436601	3.2995	0	257	_	_	_	_	_	_	_	_	_	_	_	_	_	_	_	_	_	_	_	_	_
TRINITY_DN0_c338_g1	0	0	0	1.67766	0	0	218	_	_	_	_	_	_	_	_	_	_	_	_	_	_	_	_	_	_	_	_	_
TRINITY_DN0_c346_g1	31.3172	42.8677	0	33.7182	0	35.038	300	_	_	_	_	_	_	_	_	_	_	_	_	_	_	_	_	_	_	_	_	_
TRINITY_DN0_c378_g1	4.57898	1.34038	0.863063	3.54761	2.50038	1.70341	232	_	_	_	_	_	_	_	_	_	_	_	_	_	_	_	_	_	_	_	_	_
TRINITY_DN0_c379_g1	0	2.2199	0	0	0	0	214	_	_	_	_	_	_	_	_	_	_	_	_	_	_	_	_	_	_	_	_	_
TRINITY_DN0_c385_g1	0	0	0	0	0	0	254	_	_	_	_	_	_	_	_	_	_	_	_	_	_	_	_	_	_	_	_	_
TRINITY_DN0_c38_g1	0	0.268574	0	0	0.224492	0	698	_	_	_	_	_	_	_	_	_	_	_	_	_	_	_	_	_	_	_	_	_
TRINITY_DN0_c38_g2	1.72354	1.53847	1.08794	1.11334	2.92864	1.12855	1526	_	_	_	_	_	_	_	_	_	_	_	_	_	_	_	_	_	_	_	_	_
TRINITY_DN0_c399_g1	0	1.31283	0	0.493446	0	0	236	_	_	_	_	_	_	_	_	_	_	_	_	_	_	_	_	_	_	_	_	_
TRINITY_DN0_c3_g1	0	0	0	0.108799	0	0.850027	1309	_	_	_	_	_	_	_	_	_	_	_	_	_	_	_	_	_	_	_	_	_
TRINITY_DN0_c403_g1	0	0	0	0	0	0	203	_	_	_	_	_	_	_	_	_	_	_	_	_	_	_	_	_	_	_	_	_
TRINITY_DN0_c404_g1	0	0	0	0	1.36232	0	216	_	_	_	_	_	_	_	_	_	_	_	_	_	_	_	_	_	_	_	_	_
TRINITY_DN0_c408_g1	0	0	0	0	0	0	250	_	_	_	_	_	_	_	_	_	_	_	_	_	_	_	_	_	_	_	_	_
TRINITY_DN0_c40_g1	11.032	9.5636	6.13568	20.9314	5.9342	17.2968	366	_	_	_	_	_	_	_	_	_	_	_	_	_	_	_	_	_	_	_	_	_
TRINITY_DN0_c40_g3	16.6364	7.87343	18.4455	11.1842	5.69154	2.39147	472	ADI61812.1	ADI61812.1 endonuclease-reverse transcriptase [Bombyx mori]	75	_	_	_	_	_	_	_	_	_	_	_	_	_	_	_	_	_	_
TRINITY_DN0_c42_g1	1.29696	0.979405	0.579376	0.795091	0.912943	0.786457	748	_	_	_	_	_	_	_	_	_	_	_	_	_	_	_	_	_	_	_	_	_
TRINITY_DN0_c42_g2	1.13925	0.891595	1.91266	0.709281	1.19894	0	335	_	_	_	_	_	_	_	_	_	_	_	_	_	_	_	_	_	_	_	_	_
TRINITY_DN0_c43_g1	3.39068	3.43565	2.9434	4.51329	1.51461	3.91883	982	_	_	_	_	_	_	_	_	_	_	_	_	_	_	_	_	_	_	_	_	_
TRINITY_DN0_c473_g3	0	0	0	1.19002	0	0	210	_	_	_	_	_	_	_	_	_	_	_	_	_	_	_	_	_	_	_	_	_
TRINITY_DN0_c47_g1	2.0275	0	0.796081	2.78648	0.583794	1.81696	246	_	_	_	_	_	_	_	_	_	_	_	_	_	_	_	_	_	_	_	_	_
TRINITY_DN0_c483_g1	0	0.688955	0	0	0	0	227	_	_	_	_	_	_	_	_	_	_	_	_	_	_	_	_	_	_	_	_	_
TRINITY_DN0_c4_g1	2.92536	5.15652	3.12979	0	0	0	970	_	_	_	_	_	_	_	_	_	_	_	_	_	_	_	_	_	_	_	_	_
TRINITY_DN0_c508_g1	0	0	0	0	0	0	216	_	_	_	_	_	_	_	_	_	_	_	_	_	_	_	_	_	_	_	_	_
TRINITY_DN0_c517_g1	3.6831	6.65006	2.21723	4.88037	7.89606	8.54996	3123	XP_026747457.1	XP_026747457.1 N-acetylgalactosaminyltransferase 6-like isoform X1 [Trichoplusia ni]	87.5	sp|Q6WV16|GALT6_DROME	sp|Q6WV16|GALT6_DROME N-acetylgalactosaminyltransferase 6 OS=Drosophila melanogaster OX=7227 GN=Pgant6 PE=1 SV=2	72.1	_	_	_	_	_	_	GO:0006486|protein glycosylation;GO:0009312|oligosaccharide biosynthetic process	GO:0000139|Golgi membrane;GO:0005783|endoplasmic reticulum;GO:0005794|Golgi apparatus;GO:0005795|Golgi stack;GO:0016021|integral component of membrane	GO:0004653|polypeptide N-acetylgalactosaminyltransferase activity;GO:0030246|carbohydrate binding;GO:0046872|metal ion binding	ko:K00710	GALNT	path:ko00512;path:ko01100	m.1010|TRINITY_DN0_c517_g1:254-2098(+)	complete	PF00535.23|Glycos_transf_2|Glycosyl transferase family 2|TRINITY_DN0_c517_g1_i1|m.1010:153-337;PF00652.19|Ricin_B_lectin|Ricin-type beta-trefoil lectin domain|TRINITY_DN0_c517_g1_i1|m.1010:465-587;PF02709.11|Glyco_transf_7C|N-terminal domain of galactosyltransferase|TRINITY_DN0_c517_g1_i1|m.1010:318-376
TRINITY_DN0_c518_g1	24.2118	24.8045	29.5957	42.1545	29.0316	23.2606	456	_	_	_	_	_	_	_	_	_	_	_	_	_	_	_	_	_	_	_	_	_
TRINITY_DN0_c519_g1	0	0	0	0.063095	20.9792	0.078041	593	_	_	_	_	_	_	_	_	_	_	_	_	_	_	_	_	_	_	_	_	_
TRINITY_DN0_c51_g1	3.25436	2.2371	2.21122	1.08028	1.59498	1.0445	483	_	_	_	_	_	_	_	_	_	_	_	_	_	_	_	_	_	_	_	_	_
TRINITY_DN0_c51_g2	0	0	0	0	0	0	546	_	_	_	_	_	_	_	_	_	_	_	_	_	_	_	_	_	_	_	_	_
TRINITY_DN0_c521_g1	2.2569	4.43641	1.68961	2.07197	0	1.1072	262	_	_	_	_	_	_	_	_	_	_	_	_	_	_	_	_	_	_	_	_	_
TRINITY_DN0_c523_g1	0	0	0	0	0	0	206	_	_	_	_	_	_	_	_	_	_	_	_	_	_	_	_	_	_	_	_	_
TRINITY_DN0_c525_g1	0.612265	0.262199	0.638284	2.877	0.254915	0.924864	360	_	_	_	_	_	_	_	_	_	_	_	_	_	_	_	_	_	_	_	_	_
TRINITY_DN0_c533_g1	0.822842	0.764344	0.986859	1.1998	2.12601	0	209	_	_	_	_	_	_	_	_	_	_	_	_	_	_	_	_	_	_	_	_	_
TRINITY_DN0_c535_g1	0	0	0.945072	0	0	0	216	_	_	_	_	_	_	_	_	_	_	_	_	_	_	_	_	_	_	_	_	_
TRINITY_DN0_c537_g1	0	0	0	0	0	0	207	_	_	_	_	_	_	_	_	_	_	_	_	_	_	_	_	_	_	_	_	_
TRINITY_DN0_c538_g1	0	0	0.993081	0	0	0	208	_	_	_	_	_	_	_	_	_	_	_	_	_	_	_	_	_	_	_	_	_
TRINITY_DN0_c58_g1	0.714213	1.83398	1.6914	0.618867	2.13412	0.371396	2554	_	_	_	_	_	_	_	_	_	_	_	_	_	_	_	_	_	_	_	_	_
TRINITY_DN0_c5_g1	5.47674	9.16664	9.32902	6.68367	7.47173	4.09959	1130	_	_	_	_	_	_	_	_	_	_	_	_	_	_	_	_	_	_	_	_	_
TRINITY_DN0_c61_g1	0	0	0	0	0	0	261	_	_	_	_	_	_	_	_	_	_	_	_	_	_	_	_	_	_	_	_	_
TRINITY_DN0_c64_g1	0	0	0	0	0.592142	0	243	XP_014360163.1	XP_014360163.1 PREDICTED: uncharacterized protein LOC106712191 [Papilio machaon]	87.3	_	_	_	_	_	_	_	_	_	_	_	_	_	_	_	_	_	_
TRINITY_DN0_c65_g1	1.04798	0.318535	0.484639	0.811614	0.291755	0.315251	747	_	_	_	_	_	_	_	_	_	_	_	_	_	_	_	_	_	_	_	_	_
TRINITY_DN0_c68_g1	0	0	0	0	0	0	206	_	_	_	_	_	_	_	_	_	_	_	_	_	_	_	_	_	_	_	_	_
TRINITY_DN0_c6_g1	3.95419	3.07973	1.98725	4.19132	4.91822	4.2819	1478	PZC81710.1	PZC81710.1 hypothetical protein B5X24_HaOG212154 [Helicoverpa armigera]	60.9	_	_	_	_	_	_	_	_	_	_	_	_	_	_	_	m.952|TRINITY_DN0_c6_g1:816-1313(+)	complete	_
TRINITY_DN0_c6_g2	3.29353	7.24509	3.62509	3.48218	6.71927	4.55674	2050	XP_022816299.1	XP_022816299.1 peroxidase-like protein 3 [Spodoptera litura]	75.5	_	_	_	_	_	_	_	_	_	_	_	_	_	_	_	_	_	_
TRINITY_DN0_c71_g1	0	0	0	0	0	0	324	_	_	_	_	_	_	_	_	_	_	_	_	_	_	_	_	_	_	_	_	_
TRINITY_DN0_c71_g2	0.792078	0	0.951128	1.14493	0	0	215	_	_	_	_	_	_	_	_	_	_	_	_	_	_	_	_	_	_	_	_	_
TRINITY_DN0_c73_g1	0	1.95891	0	0	0	0	237	_	_	_	_	_	_	_	_	_	_	_	_	_	_	_	_	_	_	_	_	_
TRINITY_DN0_c7_g1	3.3331	2.43658	2.63744	1.67925	3.36372	0.529528	1791	_	_	_	_	_	_	_	_	_	_	_	_	_	_	_	_	_	_	_	_	_
TRINITY_DN0_c82_g1	0.456235	1.54427	2.08977	0	0.756168	0	312	_	_	_	_	_	_	_	_	_	_	_	_	_	_	_	_	_	_	_	_	_
TRINITY_DN0_c86_g1	1.42155	0.647795	0	0.942824	0.109779	0.910645	493	_	_	_	_	_	_	_	_	_	_	_	_	_	_	_	_	_	_	_	_	_
TRINITY_DN0_c87_g1	0	0	0	0	0	0	228	_	_	_	_	_	_	_	_	_	_	_	_	_	_	_	_	_	_	_	_	_
TRINITY_DN0_c8_g1	0.291431	0.067767	0.093947	0.095165	0	0.193742	795	_	_	_	_	_	_	_	_	_	_	_	_	_	_	_	_	_	_	_	_	_
TRINITY_DN0_c8_g2	0	0	10.2474	0	4.83036	2.08924	522	_	_	_	_	_	_	_	_	_	_	_	_	_	_	_	_	_	_	_	_	_
TRINITY_DN0_c9_g1	0	0	0	0	0	0	2106	PCG76846.1	PCG76846.1 hypothetical protein B5V51_8559 [Heliothis virescens]	63	_	_	_	_	_	_	_	_	_	_	_	_	_	_	_	m.982|TRINITY_DN0_c9_g1:195-503(+)	complete	_
TRINITY_DN10000_c0_g1	1.24121	0	0.307314	1.14217	2.02281	1.31338	359	_	_	_	_	_	_	_	_	_	_	_	_	_	_	_	_	_	_	_	_	_
TRINITY_DN10001_c0_g1	0.152116	0.516673	0.389755	0.111716	0.827889	0.135581	641	_	_	_	_	_	_	_	_	_	_	_	_	_	_	_	_	_	_	m.300|TRINITY_DN10001_c0_g1:2-439(+)	5prime_partial	_
TRINITY_DN10002_c0_g1	0	0	0.143428	0.128837	0.051387	0.048524	2049	XP_013182881.1	XP_013182881.1 PREDICTED: uncharacterized protein LOC106129006 isoform X5 [Amyelois transitella]	90.3	_	_	_	_	_	_	_	_	_	_	_	_	_	_	_	_	_	_
TRINITY_DN10002_c0_g2	21.2165	28.7149	34.5214	21.9314	10.0117	15.0339	2259	QBQ58119.1	QBQ58119.1 glutathione S-transferase epsilon [Mythimna separata]	100	sp|P46430|GSTT1_MANSE	sp|P46430|GSTT1_MANSE Glutathione S-transferase 1 OS=Manduca sexta OX=7130 GN=GST1 PE=2 SV=1	65.7	_	_	_	_	_	_	GO:0006749|glutathione metabolic process		GO:0004364|glutathione transferase activity	ko:K00799	GST, gst	path:ko00480;path:ko00980;path:ko00982;path:ko01524;path:ko05204;path:ko05418	m.385|TRINITY_DN10002_c0_g2:1496-2149(+);m.384|TRINITY_DN10002_c0_g2:99-752(+)	complete;complete	PF13417.3|GST_N_3|Glutathione S-transferase, N-terminal domain|TRINITY_DN10002_c0_g2_i2|m.384:8-80;PF02798.17|GST_N|Glutathione S-transferase, N-terminal domain|TRINITY_DN10002_c0_g2_i2|m.384:17-75;PF00043.22|GST_C|Glutathione S-transferase, C-terminal domain|TRINITY_DN10002_c0_g2_i2|m.384:134-189;PF13409.3|GST_N_2|Glutathione S-transferase, N-terminal domain|TRINITY_DN10002_c0_g2_i2|m.384:10-74;…
TRINITY_DN10003_c0_g1	0.162791	0.643252	0.106576	0.510619	0.17291	0.519727	2316	XP_032516171.1	XP_032516171.1 chaoptin [Danaus plexippus plexippus]	91.9	_	_	_	_	_	_	_	_	_	_	_	_	_	_	_	_	_	_
TRINITY_DN10003_c1_g1	2.7937	6.33915	2.02347	1.42806	3.60068	0.661935	329	_	_	_	_	_	_	_	_	_	_	_	_	_	_	_	_	_	_	_	_	_
TRINITY_DN10004_c0_g1	8.55588	4.74153	8.22434	3.78913	5.21591	0	261	_	_	_	_	_	_	_	_	_	_	_	_	_	_	_	_	_	_	_	_	_
TRINITY_DN10004_c1_g1	0.080957	0	0.061393	0.144889	0.081565	0.088498	1210	_	_	_	_	_	_	_	_	_	_	_	_	_	_	_	_	_	_	_	_	_
TRINITY_DN10004_c2_g1	1.33483	0.991972	1.061	3.52354	1.80111	1.77485	896	_	_	_	_	_	_	_	_	_	_	_	_	_	_	_	_	_	_	_	_	_
TRINITY_DN10005_c0_g1	0.165476	0	0.130007	0.516499	0	0	612	_	_	_	_	_	_	_	_	_	_	_	_	_	_	_	_	_	_	_	_	_
TRINITY_DN10005_c1_g1	0.990955	0	0.597453	0.250642	0.539229	0.149683	772	_	_	_	_	_	_	_	_	_	_	_	_	_	_	_	_	_	_	_	_	_
TRINITY_DN10005_c1_g2	0.644316	0	0	1.84372	0	0	247	_	_	_	_	_	_	_	_	_	_	_	_	_	_	_	_	_	_	_	_	_
TRINITY_DN10006_c0_g1	0.976987	0.522557	0.99482	1.46962	0	0.477761	587	_	_	_	_	_	_	_	_	_	_	_	_	_	_	_	_	_	_	_	_	_
TRINITY_DN10007_c0_g1	4.37261	10.5596	7.84863	3.75967	2.18629	8.0882	524	_	_	_	_	_	_	_	_	_	_	_	_	_	_	_	_	_	_	_	_	_
TRINITY_DN10007_c0_g2	1.75038	3.08796	4.37208	0	0	0	277	_	_	_	_	_	_	_	_	_	_	_	_	_	_	_	_	_	_	_	_	_
TRINITY_DN10007_c1_g1	10.2308	10.1328	8.06208	8.55553	11.2495	7.74491	4274	_	_	_	_	_	_	_	_	_	_	_	_	_	_	_	_	_	_	_	_	_
TRINITY_DN10007_c2_g1	0	0.511086	0.640154	0	2.43727	0	278	_	_	_	_	_	_	_	_	_	_	_	_	_	_	_	_	_	_	_	_	_
TRINITY_DN10007_c2_g2	0.362816	0.383318	0.092451	0.587323	0.391424	0.080578	583	_	_	_	_	_	_	_	_	_	_	_	_	_	_	_	_	_	_	_	_	_
TRINITY_DN10007_c3_g1	11.4173	8.70788	8.78406	6.47674	7.23013	7.55365	487	_	_	_	_	_	_	_	_	_	_	_	_	_	_	_	_	_	_	_	_	_
TRINITY_DN10007_c4_g1	13.4481	18.5086	12.7283	10.8061	9.54212	2.52831	372	_	_	_	_	_	_	_	_	_	_	_	_	_	_	_	_	_	_	_	_	_
TRINITY_DN10007_c5_g1	4.36625	11.4583	11.2774	0	0	0	262	_	_	_	_	_	_	_	_	_	_	_	_	_	_	_	_	_	_	_	_	_
TRINITY_DN10007_c6_g1	0	0	0	0	0	0	240	_	_	_	_	_	_	_	_	_	_	_	_	_	_	_	_	_	_	_	_	_
TRINITY_DN10007_c7_g1	2.11469	0	0	0.980396	0	0.55342	237	_	_	_	_	_	_	_	_	_	_	_	_	_	_	_	_	_	_	_	_	_
TRINITY_DN10008_c0_g1	1.89848	7.26296	120.718	132.123	10.1007	475.048	584	_	_	_	_	_	_	_	_	_	_	_	_	_	_	_	_	_	_	_	_	_
TRINITY_DN10008_c1_g1	34.8705	13.3929	179.667	349.37	42.4192	1635.05	307	_	_	_	_	_	_	_	_	_	_	_	_	_	_	_	_	_	_	_	_	_
TRINITY_DN10008_c2_g1	15.6006	4.75948	84.1948	128.323	29.1687	829.742	251	_	_	_	_	_	_	_	_	_	_	_	_	_	_	_	_	_	_	_	_	_
TRINITY_DN10009_c0_g1	1.69755	1.08854	0.488992	0.413017	1.57651	0.88528	507	_	_	_	_	_	_	_	_	_	_	_	_	_	_	_	_	_	_	_	_	_
TRINITY_DN10009_c0_g2	0.869412	0	0.459047	0	0	0	743	RVE53044.1	RVE53044.1 hypothetical protein evm_002342 [Chilo suppressalis]	71.9	_	_	_	_	_	_	_	_	_	_	_	_	_	_	_	_	_	_
TRINITY_DN10009_c1_g1	3.02487	4.96587	2.8916	1.58433	4.43137	0.773805	352	_	_	_	_	_	_	_	_	_	_	_	_	_	_	_	_	_	_	_	_	_
TRINITY_DN10009_c2_g1	0	0	0.579072	0	0	0	1167	XP_021191604.1	XP_021191604.1 protein tramtrack, beta isoform-like isoform X24 [Helicoverpa armigera]	72.4	_	_	_	_	_	_	_	_	_	_	_	_	_	_	_	m.356|TRINITY_DN10009_c2_g1:3-335(+)	5prime_partial	PF04500.13|FLYWCH|FLYWCH zinc finger domain|TRINITY_DN10009_c2_g1_i1|m.356:29-91
TRINITY_DN1000_c0_g1	0	13.288	13.9876	6.85966	0	0	6084	_	_	_	_	_	_	_	_	_	_	_	_	_	_	_	_	_	_	_	_	_
TRINITY_DN1000_c1_g1	3.28662	2.68789	1.07889	2.46035	3.19242	1.59905	1966	_	_	_	_	_	_	_	_	_	_	_	_	_	_	_	_	_	_	m.195|TRINITY_DN1000_c1_g1:302-754(+)	complete	_
TRINITY_DN10010_c0_g1	0	0	0.281319	0.102838	0.237537	0.123388	476	_	_	_	_	_	_	_	_	_	_	_	_	_	_	_	_	_	_	_	_	_
TRINITY_DN10010_c0_g2	0	0.565918	0	0.783516	0	0.395171	777	_	_	_	_	_	_	_	_	_	_	_	_	_	_	_	_	_	_	_	_	_
TRINITY_DN10010_c0_g3	0.769079	0	0	0.550845	0.665389	0	220	_	_	_	_	_	_	_	_	_	_	_	_	_	_	_	_	_	_	_	_	_
TRINITY_DN10010_c1_g1	0.787001	4.38951	0	0	0.684124	0.625338	216	_	_	_	_	_	_	_	_	_	_	_	_	_	_	_	_	_	_	_	_	_
TRINITY_DN10011_c0_g1	0.247242	0	0	0.390311	0.118829	0	1828	_	_	_	_	_	_	_	_	_	_	_	_	_	_	_	_	_	_	_	_	_
TRINITY_DN10011_c2_g1	0.753051	0	0	1.60449	0	0	224	_	_	_	_	_	_	_	_	_	_	_	_	_	_	_	_	_	_	_	_	_
TRINITY_DN10012_c0_g1	0.076165	0	0	0	0.401659	0.150556	2027	_	_	_	_	_	_	_	_	_	_	_	_	_	_	_	_	_	_	_	_	_
TRINITY_DN10013_c0_g1	0	0.03749	0.045332	0	0.992774	0	907	_	_	_	_	_	_	_	_	_	_	_	_	_	_	_	_	_	_	_	_	_
TRINITY_DN10013_c1_g1	1.32787	1.21446	0	0	0	0	508	_	_	_	_	_	_	_	_	_	_	_	_	_	_	_	_	_	_	_	_	_
TRINITY_DN10014_c0_g1	3.27103	0	0	4.95127	0	2.4408	462	_	_	_	_	_	_	_	_	_	_	_	_	_	_	_	_	_	_	_	_	_
TRINITY_DN10015_c0_g1	0	0.315331	0	0.274752	0.536418	0.332379	499	_	_	_	_	_	_	_	_	_	_	_	_	_	_	_	_	_	_	_	_	_
TRINITY_DN10015_c1_g1	0.753051	0.700015	0	0.53483	0	0	224	_	_	_	_	_	_	_	_	_	_	_	_	_	_	_	_	_	_	_	_	_
TRINITY_DN10016_c0_g1	0	0	1.37074	0	0	1.80642	410	_	_	_	_	_	_	_	_	_	_	_	_	_	_	_	_	_	_	_	_	_
TRINITY_DN10017_c0_g1	1.73623	1.84329	1.10131	1.53483	1.37105	1.22547	4098	_	_	_	_	_	_	_	_	_	_	_	_	_	_	_	_	_	_	_	_	_
TRINITY_DN10017_c1_g1	0	0.355129	0	0	0.378185	0.37375	405	KAF9410993.1	KAF9410993.1 hypothetical protein HW555_010125 [Spodoptera exigua]	96.9	_	_	_	_	_	_	_	_	_	_	_	_	_	_	_	_	_	_
TRINITY_DN10017_c1_g2	0	0.870052	0	0	5.00454	0	380	_	_	_	_	_	_	_	_	_	_	_	_	_	_	_	_	_	_	_	_	_
TRINITY_DN10017_c2_g1	1.81867	1.4712	1.36721	0.998936	1.5459	0.730936	5625	XP_021185478.1	XP_021185478.1 HEAT repeat-containing protein 6 [Helicoverpa armigera]	93.1	_	_	_	_	_	_	_	_	_	_	_	_	_	_	_	m.319|TRINITY_DN10017_c2_g1:185-3532(+)	complete	PF13251.3|DUF4042|Domain of unknown function (DUF4042)|TRINITY_DN10017_c2_g1_i1|m.319:371-556
TRINITY_DN10017_c3_g1	0	0.550043	0	0	1.0432	0	267	_	_	_	_	_	_	_	_	_	_	_	_	_	_	_	_	_	_	_	_	_
TRINITY_DN10018_c0_g1	0.514128	0.290353	0.302446	0.344853	0.299473	0.349187	843	_	_	_	_	_	_	_	_	_	_	_	_	_	_	_	_	_	_	_	_	_
TRINITY_DN10018_c1_g1	0	0	0	1.78462	0	0	253	_	_	_	_	_	_	_	_	_	_	_	_	_	_	_	_	_	_	_	_	_
TRINITY_DN10018_c2_g1	0	0.719349	0	0	0	0	219	_	_	_	_	_	_	_	_	_	_	_	_	_	_	_	_	_	_	_	_	_
TRINITY_DN10018_c3_g1	0.49107	0	0	0.340609	0	0.399004	302	_	_	_	_	_	_	_	_	_	_	_	_	_	_	_	_	_	_	_	_	_
TRINITY_DN10019_c0_g1	0.267816	1.13801	0.105475	0.828709	0.473464	1.24915	1486	XP_021185364.1	XP_021185364.1 23 kDa integral membrane protein-like [Helicoverpa armigera]	97.8	_	_	_	_	_	_	_	_	_	_	_	_	_	_	_	m.402|TRINITY_DN10019_c0_g1:473-1288(+)	complete	PF00335.17|Tetraspannin|Tetraspanin family|TRINITY_DN10019_c0_g1_i2|m.402:9-229
TRINITY_DN10019_c1_g1	0.874897	0	0	0	1.61072	0.804412	2095	_	_	_	_	_	_	_	_	_	_	_	_	_	_	_	_	_	_	_	_	_
TRINITY_DN10019_c1_g2	0	0	2.21055	5.09312	0.356428	0.570218	319	_	_	_	_	_	_	_	_	_	_	_	_	_	_	_	_	_	_	_	_	_
TRINITY_DN10019_c2_g1	0	0.481653	0	1.4502	0	0	286	_	_	_	_	_	_	_	_	_	_	_	_	_	_	_	_	_	_	_	_	_
TRINITY_DN10019_c3_g1	0	0	0	0.615099	0	0	206	_	_	_	_	_	_	_	_	_	_	_	_	_	_	_	_	_	_	_	_	_
TRINITY_DN1001_c0_g1	1.38286	1.69841	1.17482	1.10466	1.59043	0.905152	3608	KAE9537990.1	KAE9537990.1 hypothetical protein AGLY_005962 [Aphis glycines]	73.6	_	_	_	_	_	_	_	_	_	_	_	_	_	_	_	_	_	_
TRINITY_DN1001_c1_g1	0.221885	0.279552	0	0.402069	0	0	528	_	_	_	_	_	_	_	_	_	_	_	_	_	_	_	_	_	_	_	_	_
TRINITY_DN10020_c0_g1	0.315845	0.201462	0.13582	0	0	0	4370	PCG75254.1	PCG75254.1 hypothetical protein B5V51_12012 [Heliothis virescens]	92.5	sp|Q9VUM0|MSH6_DROME	sp|Q9VUM0|MSH6_DROME Probable DNA mismatch repair protein Msh6 OS=Drosophila melanogaster OX=7227 GN=Msh6 PE=1 SV=2	68.7	_	_	_	_	_	_	GO:0000710|meiotic mismatch repair;GO:0006281|DNA repair;GO:0006290|pyrimidine dimer repair;GO:0006298|mismatch repair;GO:0008630|intrinsic apoptotic signaling pathway in response to DNA damage;GO:0036297|interstrand cross-link repair;GO:0043570|maintenance of DNA repeat elements;GO:0045910|negative regulation of DNA recombination	GO:0032300|mismatch repair complex;GO:0032301|MutSalpha complex	GO:0000400|four-way junction DNA binding;GO:0005524|ATP binding;GO:0008094|DNA-dependent ATPase activity;GO:0030983|mismatched DNA binding	ko:K08737	MSH6	path:ko01524;path:ko03430;path:ko05200;path:ko05210	m.348|TRINITY_DN10020_c0_g1:64-3447(+)	complete	PF00488.18|MutS_V|MutS domain V|TRINITY_DN10020_c0_g1_i1|m.348:899-1097;PF05192.15|MutS_III|MutS domain III|TRINITY_DN10020_c0_g1_i1|m.348:532-841;PF01624.17|MutS_I|MutS domain I|TRINITY_DN10020_c0_g1_i1|m.348:211-325;PF05190.15|MutS_IV|MutS family domain IV|TRINITY_DN10020_c0_g1_i1|m.348:712-801;PF05188.14|MutS_II|MutS domain II|TRINITY_DN10020_c0_g1_i1|m.348:342-438
TRINITY_DN10021_c0_g1	0	0.332939	0	0	0	0	487	_	_	_	_	_	_	_	_	_	_	_	_	_	_	_	_	_	_	_	_	_
TRINITY_DN10022_c0_g1	0.204351	0.168012	0.403114	0.151751	0.338583	0	413	_	_	_	_	_	_	_	_	_	_	_	_	_	_	_	_	_	_	_	_	_
TRINITY_DN10022_c0_g2	0.3133	0.412967	0.248232	0.177448	0.461662	0.159085	1365	_	_	_	_	_	_	_	_	_	_	_	_	_	_	_	_	_	_	_	_	_
TRINITY_DN10022_c1_g1	1.46569	1.6836	2.06483	1.02492	2.03576	1.58778	303	_	_	_	_	_	_	_	_	_	_	_	_	_	_	_	_	_	_	_	_	_
TRINITY_DN10022_c2_g1	0.470435	0	0.474815	0	0.100371	0	514	_	_	_	_	_	_	_	_	_	_	_	_	_	_	_	_	_	_	_	_	_
TRINITY_DN10022_c3_g1	0.343432	0.508761	0.522427	1.41877	0.371295	0.610866	600	_	_	_	_	_	_	_	_	_	_	_	_	_	_	_	_	_	_	_	_	_
TRINITY_DN10023_c0_g1	0.250481	0.225883	0.131961	0.309612	0.308534	0.043245	861	_	_	_	_	_	_	_	_	_	_	_	_	_	_	_	_	_	_	m.347|TRINITY_DN10023_c0_g1:1-861(+)	internal	PF00096.23|zf-C2H2|Zinc finger, C2H2 type|TRINITY_DN10023_c0_g1_i1|m.347:125-147;PF00096.23|zf-C2H2|Zinc finger, C2H2 type|TRINITY_DN10023_c0_g1_i1|m.347:181-203;PF00096.23|zf-C2H2|Zinc finger, C2H2 type|TRINITY_DN10023_c0_g1_i1|m.347:209-231;PF00096.23|zf-C2H2|Zinc finger, C2H2 type|TRINITY_DN10023_c0_g1_i1|m.347:237-259
TRINITY_DN10023_c0_g2	1.04569	2.99951	0.257349	0.19494	1.71286	0	380	_	_	_	_	_	_	_	_	_	_	_	_	_	_	_	_	_	_	_	_	_
TRINITY_DN10023_c0_g3	0	0	0	0	1.91348	0	207	_	_	_	_	_	_	_	_	_	_	_	_	_	_	_	_	_	_	_	_	_
TRINITY_DN10024_c0_g1	0.722336	0.694551	0.500466	0.409371	0	0.32634	4515	XP_026326444.1	XP_026326444.1 CCR4-NOT transcription complex subunit 7-like [Hyposmocoma kahamanoa]	86.3	sp|Q17345|CNOT7_CAEEL	sp|Q17345|CNOT7_CAEEL CCR4-NOT transcription complex subunit 7 OS=Caenorhabditis elegans OX=6239 GN=ccf-1 PE=2 SV=1	63.6	_	_	_	_	_	_	GO:0000289|nuclear-transcribed mRNA poly(A) tail shortening;GO:0017148|negative regulation of translation;GO:0031047|gene silencing by RNA;GO:0043928|exonucleolytic catabolism of deadenylated mRNA;GO:0048477|oogenesis	GO:0000932|P-body;GO:0005634|nucleus;GO:0005737|cytoplasm;GO:0030014|CCR4-NOT complex;GO:0030015|CCR4-NOT core complex;GO:0043186|P granule	GO:0003723|RNA binding;GO:0004535|poly(A)-specific ribonuclease activity;GO:0046872|metal ion binding	ko:K12581	CNOT7_8, CAF1, POP2	path:ko03018	m.373|TRINITY_DN10024_c0_g1:170-1045(+)	complete	PF04857.17|CAF1|CAF1 family ribonuclease|TRINITY_DN10024_c0_g1_i1|m.373:26-134;PF04857.17|CAF1|CAF1 family ribonuclease|TRINITY_DN10024_c0_g1_i1|m.373:161-247
TRINITY_DN10025_c0_g1	3.92749	0.402522	0	0.912727	1.22842	0	388	_	_	_	_	_	_	_	_	_	_	_	_	_	_	_	_	_	_	_	_	_
TRINITY_DN10026_c0_g1	0.784931	0.624653	0.303438	0.163623	0.320784	0.174637	1034	PZC86900.1	PZC86900.1 hypothetical protein B5X24_HaOG201759 [Helicoverpa armigera]	84.6	_	_	_	_	_	_	_	_	_	_	_	_	_	_	_	m.330|TRINITY_DN10026_c0_g1:236-1033(+)	3prime_partial	PF00400.29|WD40|WD domain, G-beta repeat|TRINITY_DN10026_c0_g1_i3|m.330:174-210
TRINITY_DN10027_c0_g1	0	6.69014	0	0	0	0	241	PCG70059.1	PCG70059.1 hypothetical protein B5V51_3394 [Heliothis virescens]	97.5	_	_	_	_	_	_	_	_	_	_	_	_	ko:K14572	MDN1, REA1	path:ko03008	_	_	_
TRINITY_DN10028_c0_g1	0.354584	0.311039	0	0.26785	0.315857	0.097353	1143	_	_	_	_	_	_	_	_	_	_	_	_	_	_	_	_	_	_	_	_	_
TRINITY_DN10029_c0_g1	12.2533	10.4499	11.4741	7.45216	8.9937	7.18318	1653	_	_	_	_	_	_	_	_	_	_	_	_	_	_	_	_	_	_	_	_	_
TRINITY_DN1002_c0_g1	4.0135	3.63294	1.69568	2.08339	2.40236	0.522686	5185	CAD7465117.1	CAD7465117.1 unnamed protein product, partial [Plutella xylostella]	77.6	_	_	_	_	_	_	_	_	_	_	_	_	_	_	_	_	_	_
TRINITY_DN10030_c0_g1	1.03494	0.1396	0.420457	0.530738	0.213727	0	614	_	_	_	_	_	_	_	_	_	_	_	_	_	_	_	_	_	_	_	_	_
TRINITY_DN10031_c0_g1	1.85702	0.649724	2.31646	1.16444	0.928683	1.15582	380	_	_	_	_	_	_	_	_	_	_	_	_	_	_	_	_	_	_	_	_	_
TRINITY_DN10032_c0_g1	0.791981	0.556058	0	0.171535	1.30294	0.389638	399	_	_	_	_	_	_	_	_	_	_	_	_	_	_	_	_	_	_	_	_	_
TRINITY_DN10033_c0_g1	85.4082	78.5683	0	79.6731	0	106.15	331	_	_	_	_	_	_	_	_	_	_	_	_	_	_	_	_	_	_	_	_	_
TRINITY_DN10033_c0_g2	0.231013	0.37894	0.682709	0.515265	0.19024	0.198984	396	_	_	_	_	_	_	_	_	_	_	_	_	_	_	_	_	_	_	_	_	_
TRINITY_DN10033_c0_g3	33.1721	0	0	46.996	0	0	461	_	_	_	_	_	_	_	_	_	_	_	_	_	_	_	_	_	_	_	_	_
TRINITY_DN10033_c1_g1	0.73382	0.721526	0	1.37573	0	0	437	_	_	_	_	_	_	_	_	_	_	_	_	_	_	_	_	_	_	_	_	_
TRINITY_DN10033_c2_g1	0	0.35484	0.102928	1.62153	3.30095	0.940928	729	_	_	_	_	_	_	_	_	_	_	_	_	_	_	_	_	_	_	_	_	_
TRINITY_DN10033_c3_g1	1.42053	0	1.0655	0	0.580471	0	343	KPJ20880.1	KPJ20880.1 hypothetical protein RR48_00005 [Papilio machaon]	71.4	_	_	_	_	_	_	_	_	_	_	_	_	_	_	_	_	_	_
TRINITY_DN10033_c4_g1	1.46487	0	0	0	0	0.577406	229	_	_	_	_	_	_	_	_	_	_	_	_	_	_	_	_	_	_	_	_	_
TRINITY_DN10033_c5_g1	0.123433	0.103288	0.497299	0.987811	1.05089	0	503	_	_	_	_	_	_	_	_	_	_	_	_	_	_	_	_	_	_	_	_	_
TRINITY_DN10034_c0_g1	0	2.85256	2.34896	0.049515	0.093509	1.16853	4729	XP_026736448.1	XP_026736448.1 uncharacterized protein LOC113500004 [Trichoplusia ni]	83.1	_	_	_	_	_	_	_	_	_	_	_	_	_	_	_	m.320|TRINITY_DN10034_c0_g1:1295-3643(+)	complete	_
TRINITY_DN10034_c0_g2	0.603777	0.498148	0.169062	0.009452	0	0.383629	3746	_	_	_	_	_	_	_	_	_	_	_	_	_	_	_	_	_	_	_	_	_
TRINITY_DN10034_c0_g3	54.8193	30.1092	24.5872	13.3792	49.7357	15.1125	303	_	_	_	_	_	_	_	_	_	_	_	_	_	_	_	_	_	_	_	_	_
TRINITY_DN10034_c1_g1	3.62949	1.48978	4.01317	12.3253	1163.9	0.4957	975	XP_022817893.1	XP_022817893.1 uncharacterized protein LOC111350507 [Spodoptera litura]	55.2	_	_	_	_	_	_	_	_	_	_	_	_	_	_	_	m.323|TRINITY_DN10034_c1_g1:1-852(+)	5prime_partial	_
TRINITY_DN10034_c1_g2	0	0.027008	0	0	43.5531	0	1153	KAF9419325.1	KAF9419325.1 hypothetical protein HW555_004089 [Spodoptera exigua]	52.7	_	_	_	_	_	_	_	_	_	_	_	_	_	_	_	m.325|TRINITY_DN10034_c1_g2:97-1026(+)	complete	_
TRINITY_DN10034_c2_g1	0.557555	1.08031	0.244486	0.114119	0.957214	0.28374	625	_	_	_	_	_	_	_	_	_	_	_	_	_	_	_	_	_	_	_	_	_
TRINITY_DN10034_c2_g2	1.36797	2.5283	1.61954	2.36144	4.06524	0.537028	243	_	_	_	_	_	_	_	_	_	_	_	_	_	_	_	_	_	_	_	_	_
TRINITY_DN10034_c3_g1	5.39747	4.34605	0	0.478677	0	0	241	_	_	_	_	_	_	_	_	_	_	_	_	_	_	_	_	_	_	_	_	_
TRINITY_DN10035_c0_g1	0.147433	0.058966	0	0.03664	0	0.064258	4943	KAE9523500.1	KAE9523500.1 hypothetical protein AGLY_016052 [Aphis glycines]	53.4	_	_	_	_	_	_	_	_	_	_	_	_	_	_	_	_	_	_
TRINITY_DN10035_c0_g2	2.67897	5.30958	3.64547	1.1227	0.624234	0.539556	506	_	_	_	_	_	_	_	_	_	_	_	_	_	_	_	_	_	_	_	_	_
TRINITY_DN10035_c1_g1	1.7168	0	0.684826	0.501295	0.280421	1.4422	347	_	_	_	_	_	_	_	_	_	_	_	_	_	_	_	_	_	_	_	_	_
TRINITY_DN10036_c0_g1	0.379175	0	0.947727	0.345843	0.457463	0	484	PZC85259.1	PZC85259.1 hypothetical protein B5X24_HaOG202444 [Helicoverpa armigera]	91.7	_	_	_	_	_	_	_	_	_	_	_	_	_	_	_	_	_	_
TRINITY_DN10036_c0_g2	0.104257	0.466837	0	0.165935	0.428909	0.192841	692	_	_	_	_	_	_	_	_	_	_	_	_	_	_	_	_	_	_	_	_	_
TRINITY_DN10037_c0_g1	0.977025	1.64629	1.17715	1.3732	1.81886	0.725628	893	_	_	_	_	_	_	_	_	_	_	_	_	_	_	_	_	_	_	_	_	_
TRINITY_DN10037_c0_g2	77.4123	33.4739	42.1475	64.8396	17.6038	47.2415	251	_	_	_	_	_	_	_	_	_	_	_	_	_	_	_	_	_	_	_	_	_
TRINITY_DN10037_c1_g1	1.04436	0	0	1.95718	1.78855	1.78119	2549	_	_	_	_	_	_	_	_	_	_	_	_	_	_	_	_	_	_	_	_	_
TRINITY_DN10037_c2_g1	2.79257	3.45151	1.60246	3.57279	8.78669	0	220	_	_	_	_	_	_	_	_	_	_	_	_	_	_	_	_	_	_	_	_	_
TRINITY_DN10037_c3_g1	1.83434	54.6392	74.3209	0.840956	10.1291	0.479399	268	_	_	_	_	_	_	_	_	_	_	_	_	_	_	_	_	_	_	_	_	_
TRINITY_DN10038_c0_g1	0	0	0	0	48.7201	29.336	293	_	_	_	_	_	_	_	_	_	_	_	_	_	_	_	_	_	_	_	_	_
TRINITY_DN10039_c0_g1	0.222734	0.152855	0	0	0.078434	0.2399	895	_	_	_	_	_	_	_	_	_	_	_	_	_	_	_	_	_	_	_	_	_
TRINITY_DN10039_c0_g2	0	0.107605	0.129898	0.359306	0.110161	0.112741	715	_	_	_	_	_	_	_	_	_	_	_	_	_	_	_	_	_	_	_	_	_
TRINITY_DN1003_c0_g1	35.2948	10.8582	31.9747	10.1579	7.16275	7.27412	5794	_	_	_	_	_	_	_	_	_	_	_	_	_	_	_	_	_	_	_	_	_
TRINITY_DN10040_c0_g1	0.84574	1.25016	0.393144	1.33678	2.05256	0.346043	323	_	_	_	_	_	_	_	_	_	_	_	_	_	_	_	_	_	_	_	_	_
TRINITY_DN10040_c1_g1	0.728552	1.81324	0.365205	0	0	0	340	_	_	_	_	_	_	_	_	_	_	_	_	_	_	_	_	_	_	_	_	_
TRINITY_DN10041_c0_g1	2.07115	2.4634	0	0	1.15811	1.57506	248	_	_	_	_	_	_	_	_	_	_	_	_	_	_	_	_	_	_	_	_	_
TRINITY_DN10042_c0_g1	0	5.30781	0	0	0	0	438	KAF9805415.1	KAF9805415.1 hypothetical protein SFRURICE_018306 [Spodoptera frugiperda]	93	sp|D6WJ77|ICMT_TRICA	sp|D6WJ77|ICMT_TRICA Protein-S-isoprenylcysteine O-methyltransferase OS=Tribolium castaneum OX=7070 GN=ICMT PE=1 SV=1	79.6	_	_	_	_	_	_	GO:0006481|C-terminal protein methylation	GO:0005783|endoplasmic reticulum;GO:0005789|endoplasmic reticulum membrane;GO:0016021|integral component of membrane	GO:0004671|protein C-terminal S-isoprenylcysteine carboxyl O-methyltransferase activity	ko:K00587	ICMT, STE14	path:ko00900;path:ko01130	m.311|TRINITY_DN10042_c0_g1:2-391(+)	5prime_partial	PF04140.11|ICMT|Isoprenylcysteine carboxyl methyltransferase (ICMT) family|TRINITY_DN10042_c0_g1_i1|m.311:1-89;PF04191.10|PEMT|Phospholipid methyltransferase|TRINITY_DN10042_c0_g1_i1|m.311:8-95
TRINITY_DN10043_c0_g1	0	0.619298	0.433218	0.402722	0.198081	0.320712	580	_	_	_	_	_	_	_	_	_	_	_	_	_	_	_	_	_	_	_	_	_
TRINITY_DN10044_c0_g1	0	0	0	1.48902	3.36484	0	590	_	_	_	_	_	_	_	_	_	_	_	_	_	_	_	_	_	_	_	_	_
TRINITY_DN10045_c0_g1	0	0.875202	0	0.737044	0	0.627135	789	_	_	_	_	_	_	_	_	_	_	_	_	_	_	_	_	_	_	_	_	_
TRINITY_DN10046_c0_g1	0	0.713059	0	0.646403	0	0	773	_	_	_	_	_	_	_	_	_	_	_	_	_	_	_	_	_	_	_	_	_
TRINITY_DN10046_c0_g2	0.205476	0.046153	0.223094	0.133433	0.094633	0.208325	788	_	_	_	_	_	_	_	_	_	_	_	_	_	_	_	_	_	_	_	_	_
TRINITY_DN10046_c0_g3	0.30122	0.572501	0.358826	1.16145	0.402178	0.485893	961	_	_	_	_	_	_	_	_	_	_	_	_	_	_	_	_	_	_	_	_	_
TRINITY_DN10046_c0_g4	0.042868	0.257556	0.311445	0.030306	0.188832	0.257505	919	_	_	_	_	_	_	_	_	_	_	_	_	_	_	_	_	_	_	_	_	_
TRINITY_DN10046_c1_g1	1.12206	0	0	1.08361	2.41911	0.877354	546	_	_	_	_	_	_	_	_	_	_	_	_	_	_	_	_	_	_	_	_	_
TRINITY_DN10046_c2_g1	0.138256	0.058833	0.142068	0	0.301119	0	677	_	_	_	_	_	_	_	_	_	_	_	_	_	_	_	_	_	_	_	_	_
TRINITY_DN10048_c0_g1	0	0.343037	0	0.543127	0.070687	0.860573	799	_	_	_	_	_	_	_	_	_	_	_	_	_	_	_	_	_	_	_	_	_
TRINITY_DN10048_c2_g1	0.704897	0	0	0.49037	2.43971	0.55342	237	_	_	_	_	_	_	_	_	_	_	_	_	_	_	_	_	_	_	_	_	_
TRINITY_DN10048_c3_g1	0.302275	0.125541	0.301818	0.555373	0.254634	0.265043	462	_	_	_	_	_	_	_	_	_	_	_	_	_	_	_	_	_	_	_	_	_
TRINITY_DN10048_c4_g1	0	0	0.242412	0.041756	0.051532	0.052563	747	_	_	_	_	_	_	_	_	_	_	_	_	_	_	_	_	_	_	_	_	_
TRINITY_DN10049_c0_g1	1.09831	0.939679	0.307967	0.149049	0.521589	0.813124	552	_	_	_	_	_	_	_	_	_	_	_	_	_	_	_	_	_	_	_	_	_
TRINITY_DN10049_c1_g1	1.46831	0	0	0	0	0	229	_	_	_	_	_	_	_	_	_	_	_	_	_	_	_	_	_	_	_	_	_
TRINITY_DN1004_c0_g1	111.484	105.508	86.581	0	116.424	37.1951	2678	_	_	_	_	_	_	_	_	_	_	_	_	_	_	_	_	_	_	_	_	_
TRINITY_DN1004_c0_g2	0.484088	1.66572	0	0	6.92637	0	304	_	_	_	_	_	_	_	_	_	_	_	_	_	_	_	_	_	_	_	_	_
TRINITY_DN10050_c0_g1	0	0.66306	2.56033	0	0.619042	0	234	_	_	_	_	_	_	_	_	_	_	_	_	_	_	_	_	_	_	_	_	_
TRINITY_DN10051_c0_g1	0	0	0.220797	0	0.35511	0	1564	_	_	_	_	_	_	_	_	_	_	_	_	_	_	_	_	_	_	_	_	_
TRINITY_DN10051_c0_g2	0	0	1.29436	0	1.49136	1.68738	1244	_	_	_	_	_	_	_	_	_	_	_	_	_	_	_	_	_	_	_	_	_
TRINITY_DN10051_c0_g3	0.218293	2.85637	4.44971	1.37632	8.89458	5.62368	404	_	_	_	_	_	_	_	_	_	_	_	_	_	_	_	_	_	_	_	_	_
TRINITY_DN10051_c1_g1	1.53699	0	0	0.353112	0.85909	0	296	_	_	_	_	_	_	_	_	_	_	_	_	_	_	_	_	_	_	_	_	_
TRINITY_DN10052_c0_g1	10.9406	18.0578	6.75211	37.672	8.72122	35.4834	533	KAF9414418.1	KAF9414418.1 hypothetical protein HW555_007672, partial [Spodoptera exigua]	62.4	_	_	_	_	_	_	_	_	_	_	_	_	_	_	_	_	_	_
TRINITY_DN10052_c0_g2	651.955	1031.71	753.626	1406.15	414.619	1070.12	281	_	_	_	_	_	_	_	_	_	_	_	_	_	_	_	_	_	_	_	_	_
TRINITY_DN10053_c0_g1	0	0	0	6.4858	6.24685	0	402	_	_	_	_	_	_	_	_	_	_	_	_	_	_	_	_	_	_	_	_	_
TRINITY_DN10054_c0_g1	0	0.253265	0.444573	3.26128	2.13376	0	319	_	_	_	_	_	_	_	_	_	_	_	_	_	_	_	_	_	_	_	_	_
TRINITY_DN10054_c1_g1	2.59516	2.91629	0.889147	0.305786	0.713406	0	319	_	_	_	_	_	_	_	_	_	_	_	_	_	_	_	_	_	_	_	_	_
TRINITY_DN10054_c2_g1	0.435724	0.185199	0.149048	0.583863	0.37897	0.129553	658	_	_	_	_	_	_	_	_	_	_	_	_	_	_	_	_	_	_	_	_	_
TRINITY_DN10054_c3_g1	0.432805	0.434248	0	0	0.446161	0	301	_	_	_	_	_	_	_	_	_	_	_	_	_	_	_	_	_	_	_	_	_
TRINITY_DN10055_c0_g1	0.320895	0	0.958925	0.707121	0	0.270992	355	_	_	_	_	_	_	_	_	_	_	_	_	_	_	_	_	_	_	_	_	_
TRINITY_DN10055_c0_g2	1.1785	1.08852	0	0.984734	0	0	378	_	_	_	_	_	_	_	_	_	_	_	_	_	_	_	_	_	_	_	_	_
TRINITY_DN10055_c0_g3	0.873082	1.12935	0	0.526731	0	0	473	_	_	_	_	_	_	_	_	_	_	_	_	_	_	_	_	_	_	_	_	_
TRINITY_DN10055_c1_g1	5.55355	4.61478	4.7377	4.2329	6.00746	3.01102	1711	_	_	_	_	_	_	_	_	_	_	_	_	_	_	_	_	_	_	_	_	_
TRINITY_DN10055_c2_g1	0.098553	0.166186	0	0	0	0.440526	559	_	_	_	_	_	_	_	_	_	_	_	_	_	_	_	_	_	_	_	_	_
TRINITY_DN10055_c2_g2	0.749206	0	0	0	0	0	225	_	_	_	_	_	_	_	_	_	_	_	_	_	_	_	_	_	_	_	_	_
TRINITY_DN10055_c2_g3	0	1.04333	0	0	0	0	275	_	_	_	_	_	_	_	_	_	_	_	_	_	_	_	_	_	_	_	_	_
TRINITY_DN10055_c3_g1	0	0.218137	0	0.372679	0.330812	0	492	RVE40503.1	RVE40503.1 hypothetical protein evm_014848 [Chilo suppressalis]	85.7	_	_	_	_	_	_	_	_	_	_	_	_	_	_	_	_	_	_
TRINITY_DN10056_c0_g1	14.8246	11.4228	12.3069	10.3602	8.52835	6.41974	274	_	_	_	_	_	_	_	_	_	_	_	_	_	_	_	_	_	_	_	_	_
TRINITY_DN10057_c0_g1	0	0.143292	0	0.321031	0	0.062694	4464	_	_	_	_	_	_	_	_	_	_	_	_	_	_	_	_	_	_	_	_	_
TRINITY_DN10058_c0_g1	0.317464	0.250691	0.348712	0	0.22424	0.086585	1124	_	_	_	_	_	_	_	_	_	_	_	_	_	_	_	_	_	_	_	_	_
TRINITY_DN10058_c0_g2	0	0.347748	0	0.943563	0	0.366174	408	_	_	_	_	_	_	_	_	_	_	_	_	_	_	_	_	_	_	_	_	_
TRINITY_DN10059_c0_g1	0.12414	0.294076	0.161763	0	0.027472	0	1162	_	_	_	_	_	_	_	_	_	_	_	_	_	_	_	_	_	_	_	_	_
TRINITY_DN10059_c0_g2	1.69338	1.71941	1.35774	1.33619	1.27034	0.86899	1586	PZC73185.1	PZC73185.1 hypothetical protein B5X24_HaOG209917 [Helicoverpa armigera]	75.2	_	_	_	_	_	_	_	_	_	_	_	_	_	_	_	m.416|TRINITY_DN10059_c0_g2:76-1425(+)	complete	_
TRINITY_DN1005_c0_g1	0.390667	0.457043	0.580856	0.290594	0.761971	0.672903	2089	PCG80064.1	PCG80064.1 hypothetical protein B5V51_11626 [Heliothis virescens]	94	sp|Q17P98|MED28_AEDAE	sp|Q17P98|MED28_AEDAE Mediator of RNA polymerase II transcription subunit 28 OS=Aedes aegypti OX=7159 GN=MED28 PE=3 SV=1	85.5	_	_	_	_	_	_		GO:0005634|nucleus	_	ko:K15141	MED28		m.446|TRINITY_DN1005_c0_g1:368-943(+)	complete	PF11594.5|Med28|Mediator complex subunit 28|TRINITY_DN1005_c0_g1_i2|m.446:41-122
TRINITY_DN10060_c0_g1	0	1.22604	0	1.24515	0	0	1248	_	_	_	_	_	_	_	_	_	_	_	_	_	_	_	_	_	_	_	_	_
TRINITY_DN10060_c0_g2	0	0.459784	0	0	0	0.423612	292	_	_	_	_	_	_	_	_	_	_	_	_	_	_	_	_	_	_	_	_	_
TRINITY_DN10060_c1_g1	0.117107	0.100513	0.709306	0.350552	0.199925	0.310275	515	_	_	_	_	_	_	_	_	_	_	_	_	_	_	_	_	_	_	_	_	_
TRINITY_DN10060_c2_g1	0	0	0	0.180077	0.506165	0.074297	609	_	_	_	_	_	_	_	_	_	_	_	_	_	_	_	_	_	_	_	_	_
TRINITY_DN10060_c3_g1	0	0.667277	0	0	0.327503	0.661935	329	_	_	_	_	_	_	_	_	_	_	_	_	_	_	_	_	_	_	_	_	_
TRINITY_DN10062_c0_g1	1.57378	1.98758	1.37613	0.45499	0.792071	0.082543	861	_	_	_	_	_	_	_	_	_	_	_	_	_	_	_	_	_	_	_	_	_
TRINITY_DN10063_c0_g1	0.308758	0.175208	0.087318	0.363655	0.127184	0.150302	2581	_	_	_	_	_	_	_	_	_	_	_	_	_	_	_	_	_	_	_	_	_
TRINITY_DN10064_c0_g1	0	0.666523	0.858227	0	0	1.12952	233	_	_	_	_	_	_	_	_	_	_	_	_	_	_	_	_	_	_	_	_	_
TRINITY_DN10065_c0_g1	0	0	0.666505	0	1.94324	1.95434	291	_	_	_	_	_	_	_	_	_	_	_	_	_	_	_	_	_	_	_	_	_
TRINITY_DN10065_c0_g2	0.486408	0.056341	0.058546	0.130676	0.323133	0.296342	2378	_	_	_	_	_	_	_	_	_	_	_	_	_	_	_	_	_	_	_	_	_
TRINITY_DN10066_c0_g1	7.16767	1.73491	1.19921	1.58143	2.57438	0.430968	289	_	_	_	_	_	_	_	_	_	_	_	_	_	_	_	_	_	_	_	_	_
TRINITY_DN10067_c0_g1	0.011561	0.030244	0	0.263799	0.900724	0.228485	5706	KAE9531387.1	KAE9531387.1 hypothetical protein AGLY_010593 [Aphis glycines]	59	_	_	_	_	_	_	_	_	_	_	_	_	_	_	_	_	_	_
TRINITY_DN10069_c0_g1	11.314	11.9818	0.881641	0.225626	0	1.29543	364	_	_	_	_	_	_	_	_	_	_	_	_	_	_	_	_	_	_	_	_	_
TRINITY_DN1006_c0_g1	0	0	0	0	0	0	2830	_	_	_	_	_	_	_	_	_	_	_	_	_	_	_	_	_	_	_	_	_
TRINITY_DN1006_c1_g1	0	1.53326	2.0826	0.390184	5.85417	3.03906	278	_	_	_	_	_	_	_	_	_	_	_	_	_	_	_	_	_	_	_	_	_
TRINITY_DN1006_c1_g2	0	5.80499	1.68595	4.61233	0	2.31419	855	_	_	_	_	_	_	_	_	_	_	_	_	_	_	_	_	_	_	_	_	_
TRINITY_DN1006_c2_g1	0	0.446147	0	0	0	0.929312	375	_	_	_	_	_	_	_	_	_	_	_	_	_	_	_	_	_	_	_	_	_
TRINITY_DN10070_c0_g1	0	15.091	0.244681	0.1208	44.9587	63.0266	1223	KAF9424935.1	KAF9424935.1 hypothetical protein HW555_000236 [Spodoptera exigua]	73.1	_	_	_	_	_	_	_	_	_	_	_	_	_	_	_	m.395|TRINITY_DN10070_c0_g1:429-803(+)	complete	_
TRINITY_DN10071_c0_g1	0.300218	0.739902	0	0	0	0	363	_	_	_	_	_	_	_	_	_	_	_	_	_	_	_	_	_	_	_	_	_
TRINITY_DN10072_c0_g1	0	0.155332	0	0.419267	0.516969	0.163774	425	XP_021191610.1	XP_021191610.1 protein tramtrack, beta isoform-like isoform X29 [Helicoverpa armigera]	75.7	_	_	_	_	_	_	_	_	_	_	_	_	_	_	_	m.340|TRINITY_DN10072_c0_g1:1-318(+)	5prime_partial	PF04500.13|FLYWCH|FLYWCH zinc finger domain|TRINITY_DN10072_c0_g1_i3|m.340:29-90
TRINITY_DN10072_c1_g1	0.852649	0.790184	0	0	0.732589	0	204	_	_	_	_	_	_	_	_	_	_	_	_	_	_	_	_	_	_	_	_	_
TRINITY_DN10073_c0_g1	0	0	4.31289	0	19.9174	7.82129	431	_	_	_	_	_	_	_	_	_	_	_	_	_	_	_	_	_	_	_	_	_
TRINITY_DN10074_c0_g1	0	0.058445	0	0.14591	0	0.111732	1162	_	_	_	_	_	_	_	_	_	_	_	_	_	_	_	_	_	_	m.367|TRINITY_DN10074_c0_g1:3-869(+)	5prime_partial	_
TRINITY_DN10075_c0_g1	0.123936	0.190158	0	0.382589	0.175915	0.390403	5854	_	_	_	_	_	_	_	_	_	_	_	_	_	_	_	_	_	_	_	_	_
TRINITY_DN10076_c0_g1	0.319973	0.43712	0.891137	0.458064	0.455989	0.144163	1306	_	_	_	_	_	_	_	_	_	_	_	_	_	_	_	_	_	_	_	_	_
TRINITY_DN10077_c0_g1	0.907405	0.84133	0.329039	0	1.08491	0.497835	6306	XP_022815984.1	XP_022815984.1 uncharacterized protein LOC111349212 [Spodoptera litura]	91.2	_	_	_	_	_	_	_	_	_	_	_	_	_	_	_	m.359|TRINITY_DN10077_c0_g1:168-4313(+)	complete	PF13540.3|RCC1_2|Regulator of chromosome condensation (RCC1) repeat|TRINITY_DN10077_c0_g1_i3|m.359:740-768;PF13540.3|RCC1_2|Regulator of chromosome condensation (RCC1) repeat|TRINITY_DN10077_c0_g1_i3|m.359:802-829;PF13540.3|RCC1_2|Regulator of chromosome condensation (RCC1) repeat|TRINITY_DN10077_c0_g1_i3|m.359:903-925;PF13540.3|RCC1_2|Regulator of chromosome condensation (RCC1) repeat|TRINITY_DN…
TRINITY_DN10077_c0_g2	0.114562	0.152163	0.134515	0.243628	0.124498	0.236203	3484	PCG80496.1	PCG80496.1 hypothetical protein B5V51_7057 [Heliothis virescens]	70	sp|Q9NBX4|RTXE_DROME	sp|Q9NBX4|RTXE_DROME Probable RNA-directed DNA polymerase from transposon X-element OS=Drosophila melanogaster OX=7227 GN=X-element\ORF2 PE=3 SV=1	55.8	_	_	_	_	_	_	GO:0006313|transposition, DNA-mediated		GO:0003964|RNA-directed DNA polymerase activity	_	_	_	m.362|TRINITY_DN10077_c0_g2:594-3275(+);m.363|TRINITY_DN10077_c0_g2:1-597(+)	complete;5prime_partial	PF00078.24|RVT_1|Reverse transcriptase (RNA-dependent DNA polymerase)|TRINITY_DN10077_c0_g2_i2|m.362:506-746;PF14529.3|Exo_endo_phos_2|Endonuclease-reverse transcriptase|TRINITY_DN10077_c0_g2_i2|m.362:103-215;PF03372.20|Exo_endo_phos|Endonuclease/Exonuclease/phosphatase family|TRINITY_DN10077_c0_g2_i2|m.362:7-212
TRINITY_DN10078_c0_g1	0.069705	0	0	0	0	0.072003	8524	XP_021198542.1	XP_021198542.1 breast cancer type 2 susceptibility protein [Helicoverpa armigera]	70.8	_	_	_	_	_	_	_	_	_	_	_	_	ko:K08775	BRCA2, FANCD1	path:ko03440;path:ko03460;path:ko05200;path:ko05212;path:ko05224	m.389|TRINITY_DN10078_c0_g1:183-7790(+)	complete	PF00634.15|BRCA2|BRCA2 repeat|TRINITY_DN10078_c0_g1_i7|m.389:473-500;PF00634.15|BRCA2|BRCA2 repeat|TRINITY_DN10078_c0_g1_i7|m.389:730-756;PF00634.15|BRCA2|BRCA2 repeat|TRINITY_DN10078_c0_g1_i7|m.389:789-819;PF00634.15|BRCA2|BRCA2 repeat|TRINITY_DN10078_c0_g1_i7|m.389:849-879;PF00634.15|BRCA2|BRCA2 repeat|TRINITY_DN10078_c0_g1_i7|m.389:916-947;PF00634.15|BRCA2|BRCA2 repeat|TRINITY_DN10078_c0_g1_i7…
TRINITY_DN10078_c0_g2	1.88528	1.81462	1.46881	1.71773	2.8605	1.6016	1280	_	_	_	_	_	_	_	_	_	_	_	_	_	_	_	_	_	_	_	_	_
TRINITY_DN10079_c0_g1	1.92993	1.74055	0.808403	0.936136	1.63107	0.796887	4257	_	_	_	_	_	_	_	_	_	_	_	_	_	_	_	_	_	_	_	_	_
TRINITY_DN1007_c0_g1	1.55819	0.505634	0	0.965629	0	0	4628	_	_	_	_	_	_	_	_	_	_	_	_	_	_	_	_	_	_	_	_	_
TRINITY_DN1007_c10_g1	1.13284	1.00764	0	1.54445	0.481189	2.26033	280	XP_021187158.1	XP_021187158.1 uncharacterized protein LOC110373977 [Helicoverpa armigera]	83.3	_	_	_	_	_	_	_	_	_	_	_	_	_	_	_	_	_	_
TRINITY_DN1007_c11_g1	0.127466	0.677275	0	0.690947	0.087184	0.449665	551	_	_	_	_	_	_	_	_	_	_	_	_	_	_	_	_	_	_	_	_	_
TRINITY_DN1007_c12_g1	7.27181	6.6333	4.85156	4.10578	3.48504	2.56614	212	_	_	_	_	_	_	_	_	_	_	_	_	_	_	_	_	_	_	_	_	_
TRINITY_DN1007_c13_g1	0	2.35442	2.02571	0	0	0	205	_	_	_	_	_	_	_	_	_	_	_	_	_	_	_	_	_	_	_	_	_
TRINITY_DN1007_c14_g1	2.77866	4.48744	1.92879	4.06984	2.42365	3.87882	600	_	_	_	_	_	_	_	_	_	_	_	_	_	_	_	_	_	_	_	_	_
TRINITY_DN1007_c15_g1	6.61615	7.89831	3.45334	0	2.299	5.4456	279	_	_	_	_	_	_	_	_	_	_	_	_	_	_	_	_	_	_	_	_	_
TRINITY_DN1007_c16_g1	1.17214	0	0	2.12562	0	2.61455	274	_	_	_	_	_	_	_	_	_	_	_	_	_	_	_	_	_	_	_	_	_
TRINITY_DN1007_c17_g1	0.091924	0.31066	0	0.188334	0.175003	0	579	_	_	_	_	_	_	_	_	_	_	_	_	_	_	_	_	_	_	_	_	_
TRINITY_DN1007_c18_g1	1.10553	0.535427	0	0	0.885693	0.944615	271	_	_	_	_	_	_	_	_	_	_	_	_	_	_	_	_	_	_	_	_	_
TRINITY_DN1007_c19_g1	2.37623	0	0.78243	0.572465	0	0.629408	215	_	_	_	_	_	_	_	_	_	_	_	_	_	_	_	_	_	_	_	_	_
TRINITY_DN1007_c1_g1	6.45846	6.47174	14.5679	6.85922	6.39718	9.30511	536	_	_	_	_	_	_	_	_	_	_	_	_	_	_	_	_	_	_	_	_	_
TRINITY_DN1007_c1_g2	1.62318	6.20233	1.88184	1.95157	6.42539	2.84279	659	_	_	_	_	_	_	_	_	_	_	_	_	_	_	_	_	_	_	_	_	_
TRINITY_DN1007_c2_g1	3.6016	5.14076	5.1923	2.93716	2.95566	3.1328	2085	PCG79758.1	PCG79758.1 hypothetical protein B5V51_14236 [Heliothis virescens]	96.8	_	_	_	_	_	_	_	_	_	_	_	_	_	_	_	m.667|TRINITY_DN1007_c2_g1:112-1260(+)	complete	PF02582.11|DUF155|Uncharacterised ACR, YagE family COG1723|TRINITY_DN1007_c2_g1_i1|m.667:149-325
TRINITY_DN1007_c3_g1	0.033044	5.68187	0	5.178	0.060503	0.101455	2629	_	_	_	_	_	_	_	_	_	_	_	_	_	_	_	_	_	_	_	_	_
TRINITY_DN1007_c4_g1	0.340117	0.256428	0.061437	0.292483	0.376564	0.611255	1453	KAF9819630.1	KAF9819630.1 hypothetical protein SFRURICE_005583 [Spodoptera frugiperda]	97.8	_	_	_	_	_	_	_	_	_	_	_	_	_	_	_	m.668|TRINITY_DN1007_c4_g1:1-420(+)	5prime_partial	_
TRINITY_DN1007_c5_g1	5.00117	4.3415	3.66115	4.72524	8.7077	2.14635	1625	XP_022827453.1	XP_022827453.1 muscle segmentation homeobox-like [Spodoptera litura]	96.8	sp|Q03372|HMSH_DROME	sp|Q03372|HMSH_DROME Muscle segmentation homeobox OS=Drosophila melanogaster OX=7227 GN=Dr PE=1 SV=2	61.9	_	_	_	_	_	_	GO:0007389|pattern specification process;GO:0007398|ectoderm development;GO:0007400|neuroblast fate determination;GO:0007417|central nervous system development;GO:0007419|ventral cord development;GO:0007420|brain development;GO:0007450|dorsal/ventral pattern formation, imaginal disc;GO:0007476|imaginal disc-derived wing morphogenesis;GO:0007485|imaginal disc-derived male genitalia development;GO:…	GO:0005634|nucleus	GO:0000977|RNA polymerase II transcription regulatory region sequence-specific DNA binding;GO:0000981|DNA-binding transcription factor activity, RNA polymerase II-specific;GO:0043565|sequence-specific DNA binding	ko:K09341	MSX	path:ko05166	m.670|TRINITY_DN1007_c5_g1:2-1165(+)	5prime_partial	PF00046.26|Homeobox|Homeobox domain|TRINITY_DN1007_c5_g1_i1|m.670:256-312
TRINITY_DN1007_c6_g1	0	5.71999	0	1.10169	0.708921	0	220	_	_	_	_	_	_	_	_	_	_	_	_	_	_	_	_	_	_	_	_	_
TRINITY_DN1007_c6_g2	5.79721	1.40003	3.60918	1.60482	3.25824	2.37779	224	_	_	_	_	_	_	_	_	_	_	_	_	_	_	_	_	_	_	_	_	_
TRINITY_DN1007_c7_g1	6.79534	8.01922	10.2519	5.8505	7.92904	6.68482	332	_	_	_	_	_	_	_	_	_	_	_	_	_	_	_	_	_	_	_	_	_
TRINITY_DN1007_c8_g1	0.830296	1.41659	0.526395	1.03349	0.500347	0.431819	545	_	_	_	_	_	_	_	_	_	_	_	_	_	_	_	_	_	_	_	_	_
TRINITY_DN1007_c9_g1	13.2325	5.13169	2.68319	8.52207	0.377064	5.20114	985	_	_	_	_	_	_	_	_	_	_	_	_	_	_	_	_	_	_	_	_	_
TRINITY_DN10080_c0_g1	0	1.11512	0	1.84943	0	1.27151	2301	_	_	_	_	_	_	_	_	_	_	_	_	_	_	_	_	_	_	_	_	_
TRINITY_DN10081_c0_g1	4.37584	2.51564	1.52245	1.70305	2.34979	0.489697	302	_	_	_	_	_	_	_	_	_	_	_	_	_	_	_	_	_	_	_	_	_
TRINITY_DN10081_c0_g2	0	0.440041	1.6282	0	2.97249	0	296	_	_	_	_	_	_	_	_	_	_	_	_	_	_	_	_	_	_	_	_	_
TRINITY_DN10081_c1_g1	0.104468	0.060441	0.018328	0.538619	0	0.189019	3418	_	_	_	_	_	_	_	_	_	_	_	_	_	_	_	_	_	_	_	_	_
TRINITY_DN10081_c2_g1	0	0	0	0	1.06085	0	264	_	_	_	_	_	_	_	_	_	_	_	_	_	_	_	_	_	_	_	_	_
TRINITY_DN10082_c0_g1	0.030495	0.02365	0.149916	0.052461	0.082801	0.036366	3109	KAF9408708.1	KAF9408708.1 hypothetical protein HW555_011706 [Spodoptera exigua]	78.7	_	_	_	_	_	_	_	_	_	_	_	_	ko:K15691	RFWD3		m.312|TRINITY_DN10082_c0_g1:216-2372(+)	complete	PF13639.3|zf-RING_2|Ring finger domain|TRINITY_DN10082_c0_g1_i6|m.312:271-319;PF13445.3|zf-RING_UBOX|RING-type zinc-finger|TRINITY_DN10082_c0_g1_i6|m.312:272-316;PF00097.22|zf-C3HC4|Zinc finger, C3HC4 type (RING finger)|TRINITY_DN10082_c0_g1_i6|m.312:272-318;PF13920.3|zf-C3HC4_3|Zinc finger, C3HC4 type (RING finger)|TRINITY_DN10082_c0_g1_i6|m.312:270-321;PF12861.4|zf-ANAPC11|Anaphase-promoting co…
TRINITY_DN10083_c0_g1	0.526045	0.478677	0.345189	0.229924	1.27868	0.249607	2358	KAF9808071.1	KAF9808071.1 hypothetical protein SFRURICE_017243, partial [Spodoptera frugiperda]	94.1	_	_	_	_	_	_	_	_	_	_	_	_	_	_	_	m.370|TRINITY_DN10083_c0_g1:453-2201(+)	complete	_
TRINITY_DN10084_c0_g1	0.020263	0.067616	0	0.172446	0.032414	0.554337	4274	XP_022823785.1	XP_022823785.1 uncharacterized protein LOC111354516 isoform X5 [Spodoptera litura]	65.5	_	_	_	_	_	_	_	_	_	_	_	_	_	_	_	m.418|TRINITY_DN10084_c0_g1:120-3944(+)	complete	PF16045.2|LisH_2|LisH|TRINITY_DN10084_c0_g1_i6|m.418:83-110
TRINITY_DN10084_c1_g1	9.13698	8.39967	7.84606	7.51165	8.73124	5.32916	1704	XP_035440551.1	XP_035440551.1 protein transport protein sft2-like [Spodoptera frugiperda]	98	_	_	_	_	_	_	_	_	_	_	_	_	_	_	_	m.420|TRINITY_DN10084_c1_g1:133-741(+)	complete	PF04178.9|Got1|Got1/Sft2-like family|TRINITY_DN10084_c1_g1_i1|m.420:78-188
TRINITY_DN10085_c0_g1	0.317477	0	0.145446	0.292097	0.795911	0	1658	XP_021193858.1	XP_021193858.1 senecionine N-oxygenase isoform X1 [Helicoverpa armigera]	96.5	sp|Q8MP06|SNO1_TYRJA	sp|Q8MP06|SNO1_TYRJA Senecionine N-oxygenase OS=Tyria jacobaeae OX=179666 GN=sno1 PE=1 SV=1	54.8	_	_	_	_	_	_	GO:0009820|alkaloid metabolic process;GO:0051289|protein homotetramerization	GO:0005576|extracellular region	GO:0004499|N,N-dimethylaniline monooxygenase activity;GO:0033784|senecionine N-oxygenase activity;GO:0050660|flavin adenine dinucleotide binding;GO:0050661|NADP binding	_	_	_	m.341|TRINITY_DN10085_c0_g1:149-1444(+)	complete	PF00743.16|FMO-like|Flavin-binding monooxygenase-like|TRINITY_DN10085_c0_g1_i1|m.341:3-220;PF00743.16|FMO-like|Flavin-binding monooxygenase-like|TRINITY_DN10085_c0_g1_i1|m.341:226-382;PF13738.3|Pyr_redox_3|Pyridine nucleotide-disulphide oxidoreductase|TRINITY_DN10085_c0_g1_i1|m.341:142-224;PF07992.11|Pyr_redox_2|Pyridine nucleotide-disulphide oxidoreductase|TRINITY_DN10085_c0_g1_i1|m.341:3-225;PF…
TRINITY_DN10086_c0_g1	0.214003	0.45697	0.220199	0.551278	0.465687	0.192419	533	_	_	_	_	_	_	_	_	_	_	_	_	_	_	_	_	_	_	_	_	_
TRINITY_DN10087_c0_g1	0.408086	0.315812	0.322607	0	0	0.052095	1931	XP_021184529.1	XP_021184529.1 larval cuticle protein LCP-14-like [Helicoverpa armigera]	82.8	sp|P13229|CU14_MANSE	sp|P13229|CU14_MANSE Larval cuticle protein LCP-14 OS=Manduca sexta OX=7130 GN=LCP-14 PE=2 SV=1	70.5	_	_	_	_	_	_			GO:0042302|structural constituent of cuticle	_	_	_	_	_	_
TRINITY_DN10087_c1_g1	2.22875	1.61271	0.793465	0.100465	0.061131	0.062646	671	_	_	_	_	_	_	_	_	_	_	_	_	_	_	_	_	_	_	_	_	_
TRINITY_DN10087_c2_g1	0	0	0	0	0	0	204	_	_	_	_	_	_	_	_	_	_	_	_	_	_	_	_	_	_	_	_	_
TRINITY_DN10087_c3_g1	2.82751	0.819257	1.00456	1.09576	0	0	306	_	_	_	_	_	_	_	_	_	_	_	_	_	_	_	_	_	_	_	_	_
TRINITY_DN10088_c0_g1	0.621572	0.516408	0.433733	0.664411	0.436827	0.276785	2065	PCG72062.1	PCG72062.1 hypothetical protein B5V51_1209 [Heliothis virescens]	95.2	_	_	_	_	_	_	_	_	_	_	_	_	ko:K06115	SPTB		_	_	_
TRINITY_DN10089_c0_g1	0.180211	0.076173	0.183723	0.064814	0.233367	0.080057	585	_	_	_	_	_	_	_	_	_	_	_	_	_	_	_	_	_	_	_	_	_
TRINITY_DN10089_c1_g1	0.095816	0.041052	0	0.30538	0.084228	0.042967	852	_	_	_	_	_	_	_	_	_	_	_	_	_	_	_	_	_	_	_	_	_
TRINITY_DN10089_c2_g1	1.2784	1.85444	0.816651	1.2966	0	0	452	_	_	_	_	_	_	_	_	_	_	_	_	_	_	_	_	_	_	_	_	_
TRINITY_DN1008_c0_g1	179.21	208.179	193.97	147.31	262.553	184.027	1264	_	_	_	_	_	_	_	_	_	_	_	_	_	_	_	_	_	_	_	_	_
TRINITY_DN10090_c0_g1	0	0.090697	0	0	0.739488	0.09547	535	_	_	_	_	_	_	_	_	_	_	_	_	_	_	_	_	_	_	_	_	_
TRINITY_DN10090_c0_g2	0.095633	0.15814	0.269201	0.225481	0.565527	0.019334	1556	_	_	_	_	_	_	_	_	_	_	_	_	_	_	_	_	_	_	_	_	_
TRINITY_DN10090_c1_g1	0	0.201261	0.241598	0.191308	0.201521	0.214546	388	_	_	_	_	_	_	_	_	_	_	_	_	_	_	_	_	_	_	_	_	_
TRINITY_DN10090_c2_g1	0.051816	0.08869	0.053595	0.036752	0.181894	0	809	_	_	_	_	_	_	_	_	_	_	_	_	_	_	_	_	_	_	_	_	_
TRINITY_DN10091_c0_g1	0.640752	0.826589	0.350859	0.394836	0.483525	0.632474	1175	_	_	_	_	_	_	_	_	_	_	_	_	_	_	_	_	_	_	_	_	_
TRINITY_DN10091_c1_g1	0	0	0.361844	0.303636	0.295279	0	341	KPJ11491.1	KPJ11491.1 mRNA-decapping enzyme 2 [Papilio machaon]	86.4	sp|O62255|DCP2_CAEEL	sp|O62255|DCP2_CAEEL m7GpppN-mRNA hydrolase dcap-2 OS=Caenorhabditis elegans OX=6239 GN=dcap-2 PE=1 SV=4	75	_	_	_	_	_	_	GO:0000184|nuclear-transcribed mRNA catabolic process, nonsense-mediated decay;GO:0000290|deadenylation-dependent decapping of nuclear-transcribed mRNA;GO:0002119|nematode larval development;GO:0006979|response to oxidative stress;GO:0008340|determination of adult lifespan;GO:0009408|response to heat;GO:0009411|response to UV;GO:0040012|regulation of locomotion	GO:0000932|P-body;GO:0005737|cytoplasm;GO:0043186|P granule	GO:0003723|RNA binding;GO:0030145|manganese ion binding;GO:0050072|m7G(5')pppN diphosphatase activity	ko:K12613	DCP2	path:ko03018	_	_	_
TRINITY_DN10092_c0_g1	0	0	0	0.0888	0	0	1109	_	_	_	_	_	_	_	_	_	_	_	_	_	_	_	_	_	_	_	_	_
TRINITY_DN10093_c0_g1	0.06328	0.136278	0.197885	0.400969	0.504107	0.227836	1145	_	_	_	_	_	_	_	_	_	_	_	_	_	_	_	_	_	_	_	_	_
TRINITY_DN10094_c0_g1	0	0.311678	0	0.631186	0	0.361543	578	_	_	_	_	_	_	_	_	_	_	_	_	_	_	_	_	_	_	_	_	_
TRINITY_DN10095_c0_g1	2.04252	3.34064	2.14177	3.22973	3.01588	3.55416	709	ABO45233.1	ABO45233.1 reverse transcriptase [Ostrinia nubilalis]	88	_	_	_	_	_	_	_	_	_	_	_	_	_	_	_	_	_	_
TRINITY_DN10095_c1_g1	0	0.273213	0	0.052906	0	0	1229	_	_	_	_	_	_	_	_	_	_	_	_	_	_	_	_	_	_	_	_	_
TRINITY_DN10095_c2_g1	13.0524	7.28701	0	10.6505	0	0	320	_	_	_	_	_	_	_	_	_	_	_	_	_	_	_	_	_	_	_	_	_
TRINITY_DN10095_c3_g1	0.076058	0	0	0.08727	0.066063	0.338953	641	_	_	_	_	_	_	_	_	_	_	_	_	_	_	_	_	_	_	_	_	_
TRINITY_DN10095_c4_g1	0.710043	0	0	0	0	0.447916	281	_	_	_	_	_	_	_	_	_	_	_	_	_	_	_	_	_	_	_	_	_
TRINITY_DN10095_c5_g1	0	0	0	0	0	0	202	_	_	_	_	_	_	_	_	_	_	_	_	_	_	_	_	_	_	_	_	_
TRINITY_DN10095_c6_g1	0	0	0	0	0.923963	0	286	_	_	_	_	_	_	_	_	_	_	_	_	_	_	_	_	_	_	_	_	_
TRINITY_DN10096_c0_g1	0.772037	1.60906	0	0	3.95375	0.64221	333	_	_	_	_	_	_	_	_	_	_	_	_	_	_	_	_	_	_	_	_	_
TRINITY_DN10096_c1_g1	0	0.24038	1.44547	0.257247	0.472387	0	366	_	_	_	_	_	_	_	_	_	_	_	_	_	_	_	_	_	_	_	_	_
TRINITY_DN10097_c0_g1	0	0	0	0.444253	0	0.100784	1124	_	_	_	_	_	_	_	_	_	_	_	_	_	_	_	_	_	_	_	_	_
TRINITY_DN10097_c0_g2	0	0	0.786502	0.457665	0	0	248	_	_	_	_	_	_	_	_	_	_	_	_	_	_	_	_	_	_	_	_	_
TRINITY_DN10097_c0_g3	0.116444	0.099451	0.060075	0.124321	0.152872	0	751	_	_	_	_	_	_	_	_	_	_	_	_	_	_	_	_	_	_	_	_	_
TRINITY_DN10097_c1_g1	0.61187	0.362545	0.635207	0.945273	1.19558	0.82566	639	_	_	_	_	_	_	_	_	_	_	_	_	_	_	_	_	_	_	_	_	_
TRINITY_DN10098_c0_g1	1.41099	0.165763	0.19899	0.448901	0	0.174761	415	_	_	_	_	_	_	_	_	_	_	_	_	_	_	_	_	_	_	_	_	_
TRINITY_DN10098_c1_g1	1.24111	1.65304	0.644916	1.43061	0.769988	0.397308	712	_	_	_	_	_	_	_	_	_	_	_	_	_	_	_	_	_	_	_	_	_
TRINITY_DN10098_c1_g2	0	0	0	0.813689	0	0	270	_	_	_	_	_	_	_	_	_	_	_	_	_	_	_	_	_	_	_	_	_
TRINITY_DN10098_c1_g3	0.436727	0.183514	0.442163	0.395438	0.187018	0.579606	532	_	_	_	_	_	_	_	_	_	_	_	_	_	_	_	_	_	_	_	_	_
TRINITY_DN10098_c2_g1	0	0	0.902577	0	0.651823	0	224	_	_	_	_	_	_	_	_	_	_	_	_	_	_	_	_	_	_	_	_	_
TRINITY_DN10098_c3_g1	7.28831	8.19794	8.81622	4.98191	4.44962	3.33989	2227	_	_	_	_	_	_	_	_	_	_	_	_	_	_	_	_	_	_	_	_	_
TRINITY_DN10098_c4_g1	0	0.805045	0.483197	0.182475	0.201521	0	388	_	_	_	_	_	_	_	_	_	_	_	_	_	_	_	_	_	_	_	_	_
TRINITY_DN10099_c0_g1	0.286124	0.35796	0.099853	0.065207	0.164194	0.063688	1019	_	_	_	_	_	_	_	_	_	_	_	_	_	_	_	_	_	_	_	_	_
TRINITY_DN10099_c0_g2	0	0.883149	0	0	0.426351	0	297	_	_	_	_	_	_	_	_	_	_	_	_	_	_	_	_	_	_	_	_	_
TRINITY_DN1009_c0_g1	0.984315	0.437775	0.827009	0.928685	1.21996	1.40557	3318	PCG71153.1	PCG71153.1 hypothetical protein B5V51_2183 [Heliothis virescens]	89.9	_	_	_	_	_	_	_	_	_	_	_	_	ko:K20131	RABGEF1		m.3108|TRINITY_DN1009_c0_g1:99-758(+);m.3107|TRINITY_DN1009_c0_g1:995-3163(+)	complete;complete	PF02204.15|VPS9|Vacuolar sorting protein 9 (VPS9) domain|TRINITY_DN1009_c0_g1_i5|m.3107:272-371;PF01754.13|zf-A20|A20-like zinc finger|TRINITY_DN1009_c0_g1_i5|m.3107:11-34;PF13532.3|2OG-FeII_Oxy_2|2OG-Fe(II) oxygenase superfamily|TRINITY_DN1009_c0_g1_i5|m.3108:62-212
TRINITY_DN1009_c1_g1	0.194907	0.074435	0	0.239649	0.041849	0.337258	2201	_	_	_	_	_	_	_	_	_	_	_	_	_	_	_	_	_	_	_	_	_
TRINITY_DN100_c0_g1	20.368	38.69	35.8564	15.2473	9.33438	9.61005	3358	_	_	_	_	_	_	_	_	_	_	_	_	_	_	_	_	_	_	_	_	_
TRINITY_DN100_c0_g2	12.0188	14.2416	8.79922	2.71905	28.0353	1.93334	4592	_	_	_	_	_	_	_	_	_	_	_	_	_	_	_	_	_	_	_	_	_
TRINITY_DN10100_c0_g1	0.133465	0	0.269051	0.078922	0.0705	0	2331	_	_	_	_	_	_	_	_	_	_	_	_	_	_	_	_	_	_	_	_	_
TRINITY_DN10100_c0_g2	0.209964	0.353362	0.106444	0	0.450314	0	542	_	_	_	_	_	_	_	_	_	_	_	_	_	_	_	_	_	_	_	_	_
TRINITY_DN10101_c0_g1	1.00457	0.944673	0.568914	1.46672	1.31588	1.00287	1613	PCG75648.1	PCG75648.1 hypothetical protein B5V51_11243 [Heliothis virescens]	95.2	_	_	_	_	_	_	_	_	_	_	_	_	ko:K11271	DSCC1, DCC1		m.415|TRINITY_DN10101_c0_g1:228-1502(+)	complete	PF09724.6|DUF2036|Uncharacterized conserved protein (DUF2036)|TRINITY_DN10101_c0_g1_i1|m.415:44-389
TRINITY_DN10101_c1_g1	0.093177	0.236079	0	0.067195	0.16067	0	575	_	_	_	_	_	_	_	_	_	_	_	_	_	_	_	_	_	_	_	_	_
TRINITY_DN10101_c2_g1	0	2.29303	0	0	0	0	209	RVE40503.1	RVE40503.1 hypothetical protein evm_014848 [Chilo suppressalis]	71.4	_	_	_	_	_	_	_	_	_	_	_	_	_	_	_	_	_	_
TRINITY_DN10102_c0_g1	0.298481	0.362539	0.125505	0.451769	0.524355	0.278957	3026	_	_	_	_	_	_	_	_	_	_	_	_	_	_	_	_	_	_	_	_	_
TRINITY_DN10103_c0_g1	1.1162	0.613548	1.65764	1.61376	0.929261	1.4569	427	_	_	_	_	_	_	_	_	_	_	_	_	_	_	_	_	_	_	_	_	_
TRINITY_DN10103_c1_g1	0.102663	0.175741	0.159346	0.291386	0.135166	0.092003	814	_	_	_	_	_	_	_	_	_	_	_	_	_	_	_	_	_	_	_	_	_
TRINITY_DN10103_c2_g1	0.243407	0.625506	0	0	0	0	843	_	_	_	_	_	_	_	_	_	_	_	_	_	_	_	_	_	_	_	_	_
TRINITY_DN10104_c0_g1	0	11.6152	0	0	0	0	380	_	_	_	_	_	_	_	_	_	_	_	_	_	_	_	_	_	_	_	_	_
TRINITY_DN10105_c0_g1	0.136188	0.347823	0.069999	0.340108	0.237395	0	683	XP_035443866.1	XP_035443866.1 vasoactive intestinal polypeptide receptor 2-like [Spodoptera frugiperda]	60.4	_	_	_	_	_	_	_	_	_	_	_	_	_	_	_	_	_	_
TRINITY_DN10106_c0_g1	0.136188	0.463765	0.279994	0.388695	17.2768	0	683	_	_	_	_	_	_	_	_	_	_	_	_	_	_	_	_	_	_	_	_	_
TRINITY_DN10107_c0_g1	0	0.962329	1.34789	0.433585	1.9411	1.5226	420	_	_	_	_	_	_	_	_	_	_	_	_	_	_	_	_	_	_	_	_	_
TRINITY_DN10107_c0_g2	1.12602	0	0.589818	0.449449	0	0.179493	1053	_	_	_	_	_	_	_	_	_	_	_	_	_	_	_	_	_	_	_	_	_
TRINITY_DN10108_c0_g1	0.793309	0.215964	1.03772	0.669153	0.999964	0.461036	379	_	_	_	_	_	_	_	_	_	_	_	_	_	_	_	_	_	_	_	_	_
TRINITY_DN10109_c0_g1	0.096146	0.115995	0.43422	0.115343	0.151335	0.0577	1134	XP_035456708.1	XP_035456708.1 uncharacterized protein LOC118280612 isoform X3 [Spodoptera frugiperda]	100	_	_	_	_	_	_	_	_	_	_	_	_	_	_	_	_	_	_
TRINITY_DN1010_c0_g1	2.62426	4.6689	2.14735	4.95377	2.6549	3.32095	584	_	_	_	_	_	_	_	_	_	_	_	_	_	_	_	_	_	_	_	_	_
TRINITY_DN1010_c0_g2	1.95813	4.34666	2.9085	5.32238	3.14853	3.48958	1405	_	_	_	_	_	_	_	_	_	_	_	_	_	_	_	_	_	_	_	_	_
TRINITY_DN1010_c12_g1	0	1.43	0	0.550845	0.665389	0	220	_	_	_	_	_	_	_	_	_	_	_	_	_	_	_	_	_	_	_	_	_
TRINITY_DN1010_c13_g1	0	2.58162	0	0.479951	16.8036	5.45286	610	_	_	_	_	_	_	_	_	_	_	_	_	_	_	_	_	_	_	_	_	_
TRINITY_DN1010_c14_g1	0	0	0	0	0	0.59446	224	_	_	_	_	_	_	_	_	_	_	_	_	_	_	_	_	_	_	_	_	_
TRINITY_DN1010_c15_g1	0	0	0	1.27375	0	0	202	_	_	_	_	_	_	_	_	_	_	_	_	_	_	_	_	_	_	_	_	_
TRINITY_DN1010_c1_g1	9.71174	3.64724	6.59158	6.03887	3.14254	2.58357	1175	_	_	_	_	_	_	_	_	_	_	_	_	_	_	_	_	_	_	_	_	_
TRINITY_DN1010_c1_g2	5.42793	6.68086	5.47763	5.92156	6.11724	4.33387	2628	_	_	_	_	_	_	_	_	_	_	_	_	_	_	_	_	_	_	_	_	_
TRINITY_DN1010_c2_g1	0.707905	0	0	0	0.655367	0	1794	_	_	_	_	_	_	_	_	_	_	_	_	_	_	_	_	_	_	_	_	_
TRINITY_DN1010_c3_g1	5.96996	9.60505	5.26938	7.55098	10.3985	10.517	576	_	_	_	_	_	_	_	_	_	_	_	_	_	_	_	_	_	_	_	_	_
TRINITY_DN1010_c4_g1	18.9563	23.8271	12.6814	10.3881	13.6832	6.29264	233	RVE41753.1	RVE41753.1 hypothetical protein evm_013603 [Chilo suppressalis]	59.6	_	_	_	_	_	_	_	_	_	_	_	_	_	_	_	_	_	_
TRINITY_DN1010_c6_g1	0	0	0	0	0.35018	0	786	_	_	_	_	_	_	_	_	_	_	_	_	_	_	_	_	_	_	_	_	_
TRINITY_DN1010_c7_g1	0	0	0	0	0	0	221	_	_	_	_	_	_	_	_	_	_	_	_	_	_	_	_	_	_	_	_	_
TRINITY_DN1010_c7_g2	0.78241	1.13408	0.110099	0	0.093137	0.192419	533	_	_	_	_	_	_	_	_	_	_	_	_	_	_	_	_	_	_	_	_	_
TRINITY_DN10110_c0_g1	0	0	0.058638	0	0.429429	0	1466	_	_	_	_	_	_	_	_	_	_	_	_	_	_	_	_	_	_	_	_	_
TRINITY_DN10110_c0_g2	0	1.7049	0	0	0	0	692	_	_	_	_	_	_	_	_	_	_	_	_	_	_	_	_	_	_	_	_	_
TRINITY_DN10110_c0_g3	2.63211	0	3.36623	1.50769	1.34127	0.563626	350	_	_	_	_	_	_	_	_	_	_	_	_	_	_	_	_	_	_	_	_	_
TRINITY_DN10110_c1_g1	0.42907	2.10015	0	1.30198	1.28469	0	320	_	_	_	_	_	_	_	_	_	_	_	_	_	_	_	_	_	_	_	_	_
TRINITY_DN10110_c2_g1	0.061826	0.052473	0.063378	0.087551	0.107503	0.109986	726	_	_	_	_	_	_	_	_	_	_	_	_	_	_	_	_	_	_	_	_	_
TRINITY_DN10110_c4_g1	0	0.327683	0	0.973261	0.862515	0.326009	331	_	_	_	_	_	_	_	_	_	_	_	_	_	_	_	_	_	_	_	_	_
TRINITY_DN10110_c5_g1	0	0.372726	0	0	0.378069	0	464	_	_	_	_	_	_	_	_	_	_	_	_	_	_	_	_	_	_	_	_	_
TRINITY_DN10111_c0_g1	0.645246	0.728741	0.947744	1.01772	0.918444	0.595568	697	_	_	_	_	_	_	_	_	_	_	_	_	_	_	_	_	_	_	_	_	_
TRINITY_DN10112_c0_g1	5.58614	6.76528	2.27161	5.91487	8.00042	6.85428	263	_	_	_	_	_	_	_	_	_	_	_	_	_	_	_	_	_	_	_	_	_
TRINITY_DN10113_c0_g1	0.169766	0.27759	0.251788	0.228253	0.641228	0	958	_	_	_	_	_	_	_	_	_	_	_	_	_	_	_	_	_	_	_	_	_
TRINITY_DN10113_c1_g1	0	0.692701	0	0	0	0	226	_	_	_	_	_	_	_	_	_	_	_	_	_	_	_	_	_	_	_	_	_
TRINITY_DN10114_c0_g1	7.52041	2.79597	4.07034	8.09646	8.46432	3.44225	425	KAF9416979.1	KAF9416979.1 hypothetical protein HW555_005807 [Spodoptera exigua]	79.4	sp|Q27874|PAT3_CAEEL	sp|Q27874|PAT3_CAEEL Integrin beta pat-3 OS=Caenorhabditis elegans OX=6239 GN=pat-3 PE=1 SV=1	53.9	_	_	_	_	_	_	GO:0007005|mitochondrion organization;GO:0007160|cell-matrix adhesion;GO:0007229|integrin-mediated signaling pathway;GO:0016477|cell migration;GO:0032956|regulation of actin cytoskeleton organization;GO:0033627|cell adhesion mediated by integrin;GO:0040017|positive regulation of locomotion;GO:0040028|regulation of vulval development;GO:0042059|negative regulation of epidermal growth factor recept…	GO:0005604|basement membrane;GO:0005925|focal adhesion;GO:0008305|integrin complex;GO:0009986|cell surface;GO:0016323|basolateral plasma membrane;GO:0016328|lateral plasma membrane;GO:0030018|Z disc;GO:0031430|M band;GO:0043005|neuron projection;GO:0043025|neuronal cell body;GO:0055120|striated muscle dense body	GO:0005178|integrin binding	ko:K05719	ITGB1, CD29	path:ko04015;path:ko04145;path:ko04151;path:ko04360;path:ko04510;path:ko04512;path:ko04514;path:ko04530;path:ko04611;path:ko04670;path:ko04810;path:ko05100;path:ko05130;path:ko05131;path:ko05133;path:ko05140;path:ko05145;path:ko05200;path:ko05205;path:ko05222;path:ko05410;path:ko05412;path:ko05414	m.483|TRINITY_DN10114_c0_g1:1-423(+)	internal	PF00362.15|Integrin_beta|Integrin, beta chain|TRINITY_DN10114_c0_g1_i1|m.483:3-141;PF00092.25|VWA|von Willebrand factor type A domain|TRINITY_DN10114_c0_g1_i1|m.483:44-128
TRINITY_DN10115_c0_g1	0.273499	0.176491	0.320296	0.09637	0.060436	0.123081	1081	_	_	_	_	_	_	_	_	_	_	_	_	_	_	_	_	_	_	_	_	_
TRINITY_DN10116_c0_g1	0.072589	0.160603	0	0.13577	0.081075	0.037831	4043	PCG76539.1	PCG76539.1 hypothetical protein B5V51_9240 [Heliothis virescens]	52	_	_	_	_	_	_	_	_	_	_	_	_	_	_	_	_	_	_
TRINITY_DN10116_c0_g2	0	0.572939	0	0.522624	0.02356	0.646385	1310	_	_	_	_	_	_	_	_	_	_	_	_	_	_	_	_	_	_	_	_	_
TRINITY_DN10117_c0_g1	0.557551	0	0	0	0.455826	0	372	_	_	_	_	_	_	_	_	_	_	_	_	_	_	_	_	_	_	_	_	_
TRINITY_DN10117_c0_g2	0.550959	0.151487	0	0.136008	0	0	429	_	_	_	_	_	_	_	_	_	_	_	_	_	_	_	_	_	_	_	_	_
TRINITY_DN10117_c0_g3	0.240373	0.491057	0	0.087407	0.102462	0.212142	509	XP_013198501.1	XP_013198501.1 PREDICTED: uncharacterized protein LOC106141392 isoform X1 [Amyelois transitella]	78.6	_	_	_	_	_	_	_	_	_	_	_	_	_	_	_	_	_	_
TRINITY_DN10117_c1_g1	0	23.4786	14.5485	0.799057	12.0484	0	289	_	_	_	_	_	_	_	_	_	_	_	_	_	_	_	_	_	_	_	_	_
TRINITY_DN10118_c0_g2	0.507009	0.316067	0.126436	0.024098	0.14607	0	3350	KAF9803267.1	KAF9803267.1 hypothetical protein SFRURICE_007113 [Spodoptera frugiperda]	91.2	sp|Q868Z9|PPN_DROME	sp|Q868Z9|PPN_DROME Papilin OS=Drosophila melanogaster OX=7227 GN=Ppn PE=1 SV=2	69.6	_	_	_	_	_	_	GO:0007275|multicellular organism development;GO:0030198|extracellular matrix organization	GO:0005604|basement membrane;GO:0031012|extracellular matrix	GO:0004222|metalloendopeptidase activity;GO:0004867|serine-type endopeptidase inhibitor activity;GO:0005201|extracellular matrix structural constituent	_	_	_	m.510|TRINITY_DN10118_c0_g2:2-424(+)	5prime_partial	PF05986.11|ADAM_spacer1|ADAM-TS Spacer 1|TRINITY_DN10118_c0_g2_i3|m.510:14-129
TRINITY_DN10119_c0_g1	0.906296	0	0.990822	0	1.34093	0	853	XP_021181709.1	XP_021181709.1 circadian clock-controlled protein-like [Helicoverpa armigera]	87.4	_	_	_	_	_	_	_	_	_	_	_	_	_	_	_	m.449|TRINITY_DN10119_c0_g1:3-740(+)	5prime_partial	PF06585.8|JHBP|Haemolymph juvenile hormone binding protein (JHBP)|TRINITY_DN10119_c0_g1_i2|m.449:15-243
TRINITY_DN1011_c0_g1	12.3959	11.4222	9.58661	5.50029	12.4185	5.83031	629	_	_	_	_	_	_	_	_	_	_	_	_	_	_	_	_	_	_	_	_	_
TRINITY_DN1011_c10_g1	0.816074	0.875079	0.572023	0	0.379065	0.272488	1821	XP_037972662.1	XP_037972662.1 uncharacterized protein LOC119693401 [Plutella xylostella]	85.5	_	_	_	_	_	_	_	_	_	_	_	_	_	_	_	m.2972|TRINITY_DN1011_c10_g1:942-1820(+)	3prime_partial	PF00078.24|RVT_1|Reverse transcriptase (RNA-dependent DNA polymerase)|TRINITY_DN1011_c10_g1_i1|m.2972:2-161
TRINITY_DN1011_c11_g1	0	0	5.61208	0	3.59438	2.61262	249	GBP70902.1	GBP70902.1 hypothetical protein EVAR_48867_1 [Eumeta japonica]	60.8	_	_	_	_	_	_	_	_	_	_	_	_	_	_	_	_	_	_
TRINITY_DN1011_c12_g1	0	0	0	0	0	0	227	_	_	_	_	_	_	_	_	_	_	_	_	_	_	_	_	_	_	_	_	_
TRINITY_DN1011_c13_g1	0	0	1.66781	0	0.888123	0	238	_	_	_	_	_	_	_	_	_	_	_	_	_	_	_	_	_	_	_	_	_
TRINITY_DN1011_c14_g1	0.760793	0.707045	0	0	0.658381	0	222	_	_	_	_	_	_	_	_	_	_	_	_	_	_	_	_	_	_	_	_	_
TRINITY_DN1011_c15_g1	0	0	0	0.585735	0	0	212	_	_	_	_	_	_	_	_	_	_	_	_	_	_	_	_	_	_	_	_	_
TRINITY_DN1011_c1_g1	68.9434	32.0792	37.8393	83.3846	1389.39	25.5963	390	ABO45233.1	ABO45233.1 reverse transcriptase [Ostrinia nubilalis]	81.8	sp|Q10126|YSM6_CAEEL	sp|Q10126|YSM6_CAEEL Putative uncharacterized transposon-derived protein F52C9.6 OS=Caenorhabditis elegans OX=6239 GN=F52C9.6 PE=5 SV=1	50	_	_	_	_	_	_	_	_	_	_	_	_	_	_	_
TRINITY_DN1011_c1_g2	1.64565	0.764344	1.97372	0.455728	0.706128	0	209	PZC80416.1	PZC80416.1 hypothetical protein B5X24_HaOG214718 [Helicoverpa armigera]	79.7	_	_	_	_	_	_	_	_	_	_	_	_	_	_	_	_	_	_
TRINITY_DN1011_c1_g3	7.68919	10.2152	9.98591	7.33983	8.07622	3.79739	543	XP_028175804.1	XP_028175804.1 uncharacterized protein LOC114364024 [Ostrinia furnacalis]	50	_	_	_	_	_	_	_	_	_	_	_	_	_	_	_	_	_	_
TRINITY_DN1011_c1_g4	0.718914	0.710858	0	0	0	0	221	ADI61817.1	ADI61817.1 endonuclease-reverse transcriptase [Bombyx mori]	78.3	_	_	_	_	_	_	_	_	_	_	_	_	ko:K02649	PIK3R1_2_3	path:ko01521;path:ko01522;path:ko01524;path:ko04012;path:ko04014;path:ko04015;path:ko04024;path:ko04062;path:ko04066;path:ko04068;path:ko04070;path:ko04071;path:ko04072;path:ko04140;path:ko04150;path:ko04151;path:ko04152;path:ko04210;path:ko04211;path:ko04213;path:ko04360;path:ko04370;path:ko04380;path:ko04510;path:ko04550;path:ko04611;path:ko04620;path:ko04630;path:ko04650;path:ko04660;path:ko04…	_	_	_
TRINITY_DN1011_c2_g1	0	0	0	1.47938	0	0	862	_	_	_	_	_	_	_	_	_	_	_	_	_	_	_	_	_	_	_	_	_
TRINITY_DN1011_c2_g2	0.530033	0	0	0	0	0.852522	291	_	_	_	_	_	_	_	_	_	_	_	_	_	_	_	_	_	_	_	_	_
TRINITY_DN1011_c3_g1	2.83295	2.18751	2.58056	1.11942	2.75373	1.6021	3232	XP_022818208.1	XP_022818208.1 exportin-2 [Spodoptera litura]	94.1	sp|Q9XZU1|XPO2_DROME	sp|Q9XZU1|XPO2_DROME Exportin-2 OS=Drosophila melanogaster OX=7227 GN=Cse1 PE=2 SV=2	69.2	_	_	_	_	_	_	GO:0006606|protein import into nucleus;GO:0006611|protein export from nucleus	GO:0005635|nuclear envelope;GO:0005654|nucleoplasm;GO:0005829|cytosol	GO:0005049|nuclear export signal receptor activity	ko:K18423	CSE1, CAS, XPO2		m.2968|TRINITY_DN1011_c3_g1:119-3022(+)	complete	PF08506.7|Cse1|Cse1|TRINITY_DN1011_c3_g1_i2|m.2968:157-527;PF03378.12|CAS_CSE1|CAS/CSE protein, C-terminus|TRINITY_DN1011_c3_g1_i2|m.2968:536-958;PF03810.16|IBN_N|Importin-beta N-terminal domain|TRINITY_DN1011_c3_g1_i2|m.2968:29-102
TRINITY_DN1011_c4_g1	5.8039	4.24429	4.51081	3.01788	2.64801	3.30794	609	_	_	_	_	_	_	_	_	_	_	_	_	_	_	_	_	_	_	_	_	_
TRINITY_DN1011_c6_g1	1.03129	4.39223	1.59756	0.161606	1.11109	0.955985	2761	KAF9423137.1	KAF9423137.1 hypothetical protein HW555_001441 [Spodoptera exigua]	66.8	_	_	_	_	_	_	_	_	_	_	_	_	_	_	_	m.2970|TRINITY_DN1011_c6_g1:132-1124(+)	complete	PF00339.26|Arrestin_N|Arrestin (or S-antigen), N-terminal domain|TRINITY_DN1011_c6_g1_i2|m.2970:10-142;PF02752.19|Arrestin_C|Arrestin (or S-antigen), C-terminal domain|TRINITY_DN1011_c6_g1_i2|m.2970:169-296
TRINITY_DN1011_c7_g1	2.00435	1.89452	2.38589	1.34698	2.85042	2.28833	592	_	_	_	_	_	_	_	_	_	_	_	_	_	_	_	_	_	_	_	_	_
TRINITY_DN1011_c8_g1	0.726436	0	0	0.509494	0	0	231	_	_	_	_	_	_	_	_	_	_	_	_	_	_	_	_	_	_	_	_	_
TRINITY_DN10120_c0_g1	0	0.264557	0	0.272079	0	0.885794	5047	_	_	_	_	_	_	_	_	_	_	_	_	_	_	_	_	_	_	m.436|TRINITY_DN10120_c0_g1:2086-2400(+)	complete	_
TRINITY_DN10121_c0_g1	31.6498	18.7785	0	0	18.9887	0	297	_	_	_	_	_	_	_	_	_	_	_	_	_	_	_	_	_	_	_	_	_
TRINITY_DN10122_c0_g1	0.276726	0.404828	0.201762	0	0.302308	0	1271	_	_	_	_	_	_	_	_	_	_	_	_	_	_	_	_	_	_	_	_	_
TRINITY_DN10123_c0_g1	0.236062	0.200283	0	0.677702	0.204808	0.350462	629	_	_	_	_	_	_	_	_	_	_	_	_	_	_	_	_	_	_	_	_	_
TRINITY_DN10124_c0_g1	0	0.342978	0.229489	0.155016	1.20833	0	410	_	_	_	_	_	_	_	_	_	_	_	_	_	_	_	_	_	_	_	_	_
TRINITY_DN10125_c0_g1	1.30005	0.548776	0.385836	0.233213	0.7338	0.412274	576	_	_	_	_	_	_	_	_	_	_	_	_	_	_	_	_	_	_	_	_	_
TRINITY_DN10125_c0_g2	3.83614	2.13173	0	2.90755	0	0	939	_	_	_	_	_	_	_	_	_	_	_	_	_	_	_	_	_	_	_	_	_
TRINITY_DN10125_c0_g3	0	0	0.315632	0.233886	0.780998	0	356	_	_	_	_	_	_	_	_	_	_	_	_	_	_	_	_	_	_	_	_	_
TRINITY_DN10125_c0_g4	1.78642	0.978108	0	0	0.972358	0.340483	364	_	_	_	_	_	_	_	_	_	_	_	_	_	_	_	_	_	_	_	_	_
TRINITY_DN10125_c0_g5	4.87502	4.5458	3.17798	3.23362	1.79669	2.9149	265	_	_	_	_	_	_	_	_	_	_	_	_	_	_	_	_	_	_	_	_	_
TRINITY_DN10125_c2_g1	1.89488	0	0	0.330409	0	0.386409	307	_	_	_	_	_	_	_	_	_	_	_	_	_	_	_	_	_	_	_	_	_
TRINITY_DN10125_c3_g1	2.27117	0.703644	0	0	0	0	223	_	_	_	_	_	_	_	_	_	_	_	_	_	_	_	_	_	_	_	_	_
TRINITY_DN10125_c4_g1	0.134934	0.11255	0	0	0.114366	0	484	_	_	_	_	_	_	_	_	_	_	_	_	_	_	_	_	_	_	_	_	_
TRINITY_DN10125_c5_g1	0.83456	0.774391	0	0	0	0	207	_	_	_	_	_	_	_	_	_	_	_	_	_	_	_	_	_	_	_	_	_
TRINITY_DN10125_c6_g1	0	0	0	0	0.597738	0	241	_	_	_	_	_	_	_	_	_	_	_	_	_	_	_	_	_	_	_	_	_
TRINITY_DN10126_c0_g1	0.415233	0.477474	0.274077	0.048744	0	0	1197	_	_	_	_	_	_	_	_	_	_	_	_	_	_	_	_	_	_	m.424|TRINITY_DN10126_c0_g1:1-318(+)	5prime_partial	_
TRINITY_DN10127_c0_g1	1.20186	0	0.96956	1.22386	1.12708	0	509	_	_	_	_	_	_	_	_	_	_	_	_	_	_	_	_	_	_	_	_	_
TRINITY_DN10127_c0_g2	0.594839	0.408961	0.297188	0.655211	1.25385	0.82289	465	_	_	_	_	_	_	_	_	_	_	_	_	_	_	_	_	_	_	_	_	_
TRINITY_DN10127_c1_g1	0.581064	0.210959	0.424191	0.476337	0.289056	0.153872	611	_	_	_	_	_	_	_	_	_	_	_	_	_	_	_	_	_	_	_	_	_
TRINITY_DN10127_c2_g1	0	0.8816	0.634826	0	0.531973	0	406	_	_	_	_	_	_	_	_	_	_	_	_	_	_	_	_	_	_	_	_	_
TRINITY_DN10128_c0_g1	0.272377	0	0.069999	0	0	0	683	_	_	_	_	_	_	_	_	_	_	_	_	_	_	_	_	_	_	_	_	_
TRINITY_DN10128_c0_g2	2.86121	0	0	2.09075	0	0.958758	482	_	_	_	_	_	_	_	_	_	_	_	_	_	_	_	_	_	_	_	_	_
TRINITY_DN10129_c0_g1	5.45308	0	0	3.37009	0	0	455	_	_	_	_	_	_	_	_	_	_	_	_	_	_	_	_	_	_	_	_	_
TRINITY_DN1012_c0_g1	0.495205	0	1.07801	0.7215	1.6428	1.56826	2780	KAF9797954.1	KAF9797954.1 hypothetical protein SFRURICE_019297, partial [Spodoptera frugiperda]	62.2	_	_	_	_	_	_	_	_	_	_	_	_	_	_	_	_	_	_
TRINITY_DN1012_c2_g1	0.840561	0.779538	1.00633	0	0.722944	0	206	_	_	_	_	_	_	_	_	_	_	_	_	_	_	_	_	_	_	_	_	_
TRINITY_DN10130_c0_g1	24.1437	0	0	10.6298	0	0	269	_	_	_	_	_	_	_	_	_	_	_	_	_	_	_	_	_	_	_	_	_
TRINITY_DN10131_c0_g1	0	5.91742	3.24038	0	13.3036	0	353	_	_	_	_	_	_	_	_	_	_	_	_	_	_	_	_	_	_	_	_	_
TRINITY_DN10131_c1_g1	0.042042	0	0	0	0	0	3363	_	_	_	_	_	_	_	_	_	_	_	_	_	_	_	_	_	_	_	_	_
TRINITY_DN10131_c2_g1	0.11907	0.102304	0.041244	0.168159	0.280109	0.28634	970	_	_	_	_	_	_	_	_	_	_	_	_	_	_	_	_	_	_	_	_	_
TRINITY_DN10132_c0_g1	2.85436	0.769921	0	0	0	0.696556	276	PCG72623.1	PCG72623.1 hypothetical protein B5V51_614 [Heliothis virescens]	90.1	_	_	_	_	_	_	_	_	_	_	_	_	ko:K14544	UTP22, NOL6	path:ko03008	_	_	_
TRINITY_DN10132_c1_g1	3.33824	2.32317	1.99922	0	5.02657	1.33076	207	_	_	_	_	_	_	_	_	_	_	_	_	_	_	_	_	_	_	_	_	_
TRINITY_DN10133_c0_g1	0	0.993895	0	1.56343	0	1.19413	1851	_	_	_	_	_	_	_	_	_	_	_	_	_	_	_	_	_	_	m.499|TRINITY_DN10133_c0_g1:748-1146(+)	complete	_
TRINITY_DN10133_c0_g2	0	0.154861	0	0	0.665851	0	3334	KFM66081.1	KFM66081.1 hypothetical protein X975_01935, partial [Stegodyphus mimosarum]	71.4	_	_	_	_	_	_	_	_	_	_	_	_	_	_	_	_	_	_
TRINITY_DN10133_c1_g1	0	0	0	0	1.16952	0	261	_	_	_	_	_	_	_	_	_	_	_	_	_	_	_	_	_	_	_	_	_
TRINITY_DN10134_c0_g1	17.3166	0.717557	4.92328	5.7239	0.70101	3.09782	321	_	_	_	_	_	_	_	_	_	_	_	_	_	_	_	_	_	_	_	_	_
TRINITY_DN10136_c0_g1	1.6763	1.48931	0.619652	1.52785	0.949543	0.447329	282	_	_	_	_	_	_	_	_	_	_	_	_	_	_	_	_	_	_	_	_	_
TRINITY_DN10137_c0_g1	0	11.9401	7.99889	6.42136	0	10.8187	227	_	_	_	_	_	_	_	_	_	_	_	_	_	_	_	_	_	_	_	_	_
TRINITY_DN10138_c0_g1	1.35912	0	0.552547	0.96477	0.909764	0.323757	427	KPJ06866.1	KPJ06866.1 hypothetical protein RR48_11365 [Papilio machaon]	60.6	_	_	_	_	_	_	_	_	_	_	_	_	_	_	_	_	_	_
TRINITY_DN10139_c0_g1	0	0.457746	0	0.650755	0	0.391609	908	_	_	_	_	_	_	_	_	_	_	_	_	_	_	_	_	_	_	_	_	_
TRINITY_DN10139_c1_g1	0.362816	0.076664	0.092451	0	0.15657	0.080578	583	_	_	_	_	_	_	_	_	_	_	_	_	_	_	_	_	_	_	_	_	_
TRINITY_DN10139_c2_g1	0	0	0	0.506264	0.625096	0	232	_	_	_	_	_	_	_	_	_	_	_	_	_	_	_	_	_	_	_	_	_
TRINITY_DN1013_c0_g1	673.85	615.166	774.858	933.883	0.386887	801.395	2563	XP_021183141.1	XP_021183141.1 calphotin-like [Helicoverpa armigera]	60.5	_	_	_	_	_	_	_	_	_	_	_	_	_	_	_	m.3131|TRINITY_DN1013_c0_g1:1-723(+)	5prime_partial	_
TRINITY_DN1013_c0_g2	0	0	0	0.398507	0.385232	131.852	844	KAF9420324.1	KAF9420324.1 hypothetical protein HW555_003385 [Spodoptera exigua]	79.2	_	_	_	_	_	_	_	_	_	_	_	_	_	_	_	m.3142|TRINITY_DN1013_c0_g2:54-680(+)	complete	_
TRINITY_DN1013_c0_g3	413.639	1036.28	729.351	744.257	36.5777	860.725	467	KAF9424950.1	KAF9424950.1 hypothetical protein HW555_000251 [Spodoptera exigua]	85.4	_	_	_	_	_	_	_	_	_	_	_	_	_	_	_	_	_	_
TRINITY_DN1013_c10_g1	0	0	0.357789	0.215606	0	0.330309	2638	XP_024082199.1	XP_024082199.1 protein ALP1-like [Cimex lectularius]	77.4	_	_	_	_	_	_	_	_	_	_	_	_	_	_	_	_	_	_
TRINITY_DN1013_c13_g1	3.0479	3.4221	1.53394	1.97849	3.78263	5.09464	1859	_	_	_	_	_	_	_	_	_	_	_	_	_	_	_	_	_	_	m.3182|TRINITY_DN1013_c13_g1:537-1319(+)	complete	_
TRINITY_DN1013_c14_g1	17.4618	13.5301	26.1138	35.359	0	18.1477	328	_	_	_	_	_	_	_	_	_	_	_	_	_	_	_	_	_	_	_	_	_
TRINITY_DN1013_c19_g1	49.6452	36.4626	52.4526	114.694	38.4482	58.7757	305	PCG77127.1	PCG77127.1 hypothetical protein B5V51_8045 [Heliothis virescens]	82.8	_	_	_	_	_	_	_	_	_	_	_	_	_	_	_	_	_	_
TRINITY_DN1013_c1_g1	4.8966	2.30504	0.56552	1.96142	1.81248	3.4608	618	_	_	_	_	_	_	_	_	_	_	_	_	_	_	_	_	_	_	_	_	_
TRINITY_DN1013_c1_g2	1.15034	4.91746	2.68343	1.36273	2.87645	0.026748	1260	_	_	_	_	_	_	_	_	_	_	_	_	_	_	_	_	_	_	_	_	_
TRINITY_DN1013_c1_g3	0.625665	0.517911	0	1.58766	0.255628	2.29901	358	_	_	_	_	_	_	_	_	_	_	_	_	_	_	_	_	_	_	_	_	_
TRINITY_DN1013_c1_g4	0	0.521667	0.654896	0	0	0	275	_	_	_	_	_	_	_	_	_	_	_	_	_	_	_	_	_	_	_	_	_
TRINITY_DN1013_c20_g1	489.619	377.702	601.436	1012.92	0	662.442	201	_	_	_	_	_	_	_	_	_	_	_	_	_	_	_	_	_	_	_	_	_
TRINITY_DN1013_c2_g1	10.5312	9.62078	8.02315	3.34807	12.5188	3.58976	2880	XP_022820672.1	XP_022820672.1 glycerol-3-phosphate dehydrogenase, mitochondrial isoform X1 [Spodoptera litura]	98.5	sp|P90795|GPDM_CAEEL	sp|P90795|GPDM_CAEEL Probable glycerol-3-phosphate dehydrogenase, mitochondrial OS=Caenorhabditis elegans OX=6239 GN=gpdh-3 PE=3 SV=2	76.7	_	_	_	_	_	_	GO:0006072|glycerol-3-phosphate metabolic process;GO:0019563|glycerol catabolic process	GO:0005739|mitochondrion;GO:0009331|glycerol-3-phosphate dehydrogenase complex	GO:0005509|calcium ion binding;GO:0052591|sn-glycerol-3-phosphate:ubiquinone-8 oxidoreductase activity	ko:K00111	glpA, glpD	path:ko00564;path:ko01110	m.3148|TRINITY_DN1013_c2_g1:457-2622(+)	complete	PF01266.21|DAO|FAD dependent oxidoreductase|TRINITY_DN1013_c2_g1_i5|m.3148:67-430;PF16901.2|DAO_C|C-terminal domain of alpha-glycerophosphate oxidase|TRINITY_DN1013_c2_g1_i5|m.3148:454-579;PF13499.3|EF-hand_7|EF-hand domain pair|TRINITY_DN1013_c2_g1_i5|m.3148:621-679;PF00890.21|FAD_binding_2|FAD binding domain|TRINITY_DN1013_c2_g1_i5|m.3148:67-108
TRINITY_DN1013_c3_g1	0.110104	0.511474	0	0.305771	0.859656	0.474751	1562	_	_	_	_	_	_	_	_	_	_	_	_	_	_	_	_	_	_	_	_	_
TRINITY_DN1013_c4_g1	0	1.75495	0	0	0	0.868372	4125	XP_026745413.1	XP_026745413.1 protein IWS1 homolog isoform X2 [Trichoplusia ni]	79.5	sp|Q61MR2|IWS1_CAEBR	sp|Q61MR2|IWS1_CAEBR IWS1-like protein OS=Caenorhabditis briggsae OX=6238 GN=CBG08373 PE=3 SV=3	55.8	_	_	_	_	_	_	GO:0010793|regulation of mRNA export from nucleus;GO:0050684|regulation of mRNA processing;GO:2001253|regulation of histone H3-K36 trimethylation	GO:0005634|nucleus	_	ko:K17498	SPN1, IWS1		m.3165|TRINITY_DN1013_c4_g1:2095-2409(+);m.3163|TRINITY_DN1013_c4_g1:187-2025(+);m.3164|TRINITY_DN1013_c4_g1:278-1588(+)	complete;complete;complete	PF08711.8|Med26|TFIIS helical bundle-like domain|TRINITY_DN1013_c4_g1_i6|m.3163:514-565
TRINITY_DN1013_c5_g1	0	0	0	0	1.41424	0.926645	2363	XP_022819250.1	XP_022819250.1 serine/arginine repetitive matrix protein 1 isoform X2 [Spodoptera litura]	87.5	_	_	_	_	_	_	_	_	_	_	_	_	_	_	_	m.3170|TRINITY_DN1013_c5_g1:425-1936(+)	complete	PF15692.2|NKAP|NF-kappa-B-activating protein|TRINITY_DN1013_c5_g1_i5|m.3170:48-134
TRINITY_DN1013_c6_g1	4.3994	4.58208	3.53112	3.23742	4.79862	2.38897	4666	_	_	_	_	_	_	_	_	_	_	_	_	_	_	_	_	_	_	_	_	_
TRINITY_DN1013_c7_g1	0	1.36992	1.47099	3.53823	0.573148	0	407	_	_	_	_	_	_	_	_	_	_	_	_	_	_	_	_	_	_	_	_	_
TRINITY_DN1013_c7_g2	3.24951	2.5395	3.33876	0.630007	1.4413	0.887705	716	_	_	_	_	_	_	_	_	_	_	_	_	_	_	_	_	_	_	_	_	_
TRINITY_DN1013_c8_g1	1.44146	1.94172	1.57749	1.66666	1.88405	1.65212	4145	PCG80300.1	PCG80300.1 hypothetical protein B5V51_9468 [Heliothis virescens]	92.3	_	_	_	_	_	_	_	_	_	_	_	_	ko:K18735	SMG9		m.3173|TRINITY_DN1013_c8_g1:94-1566(+)	complete	_
TRINITY_DN10140_c0_g1	3.43991	0.511086	0	0	0	0	278	_	_	_	_	_	_	_	_	_	_	_	_	_	_	_	_	_	_	_	_	_
TRINITY_DN10141_c0_g1	0.3313	0.870999	0	0.052756	0.225688	0	1918	_	_	_	_	_	_	_	_	_	_	_	_	_	_	_	_	_	_	_	_	_
TRINITY_DN10142_c0_g1	0	0	0	0.527131	0.088804	1.9454	822	KAF9796820.1	KAF9796820.1 hypothetical protein SFRURICE_014117, partial [Spodoptera frugiperda]	94.1	_	_	_	_	_	_	_	_	_	_	_	_	ko:K00665	FASN	path:ko00061;path:ko01100;path:ko01212;path:ko04152;path:ko04910	m.466|TRINITY_DN10142_c0_g1:170-820(+)	3prime_partial	PF00109.23|ketoacyl-synt|Beta-ketoacyl synthase, N-terminal domain|TRINITY_DN10142_c0_g1_i1|m.466:21-215
TRINITY_DN10143_c0_g1	0	10.48	0	0	9.04999	8.34053	420	_	_	_	_	_	_	_	_	_	_	_	_	_	_	_	_	_	_	_	_	_
TRINITY_DN10143_c1_g1	0	0	0	0	0	0	229	_	_	_	_	_	_	_	_	_	_	_	_	_	_	_	_	_	_	_	_	_
TRINITY_DN10144_c0_g1	20.0509	36.0299	69.5733	17.143	0	23.0184	755	_	_	_	_	_	_	_	_	_	_	_	_	_	_	_	_	_	_	_	_	_
TRINITY_DN10144_c1_g1	0	0	0.326405	0.98197	1.0065	0	2434	_	_	_	_	_	_	_	_	_	_	_	_	_	_	_	_	_	_	_	_	_
TRINITY_DN10144_c2_g1	0.172098	0.150619	0	0.214988	0.351584	0.308058	758	_	_	_	_	_	_	_	_	_	_	_	_	_	_	_	_	_	_	_	_	_
TRINITY_DN10144_c3_g1	0.374492	0.463061	0.926684	0.416249	0	0	426	_	_	_	_	_	_	_	_	_	_	_	_	_	_	_	_	_	_	_	_	_
TRINITY_DN10144_c3_g2	1.01298	0	0	0	0.62303	0.20984	384	_	_	_	_	_	_	_	_	_	_	_	_	_	_	_	_	_	_	_	_	_
TRINITY_DN10144_c4_g1	3.01321	0	0.999555	0.734855	0	0.281813	350	_	_	_	_	_	_	_	_	_	_	_	_	_	_	_	_	_	_	_	_	_
TRINITY_DN10144_c4_g2	0	0	0.525513	0	0.413285	0	301	_	_	_	_	_	_	_	_	_	_	_	_	_	_	_	_	_	_	_	_	_
TRINITY_DN10144_c5_g1	1.71491	1.13423	0.170296	0.633368	1.31125	0.598762	440	_	_	_	_	_	_	_	_	_	_	_	_	_	_	_	_	_	_	_	_	_
TRINITY_DN10144_c6_g1	0	0	0	0	0.176127	0.184333	407	_	_	_	_	_	_	_	_	_	_	_	_	_	_	_	_	_	_	_	_	_
TRINITY_DN10144_c7_g1	0.771797	0	1.03259	0	2.96841	0	202	_	_	_	_	_	_	_	_	_	_	_	_	_	_	_	_	_	_	_	_	_
TRINITY_DN10145_c0_g1	2.10514	1.72644	0.296724	1.32896	1.22542	1.27325	384	_	_	_	_	_	_	_	_	_	_	_	_	_	_	_	_	_	_	_	_	_
TRINITY_DN10146_c0_g1	0.691594	0	0	0	0.586449	0	245	XP_021200188.1	XP_021200188.1 G-protein coupled receptor Mth2-like [Helicoverpa armigera]	91.7	_	_	_	_	_	_	_	_	_	_	_	_	_	_	_	_	_	_
TRINITY_DN10147_c0_g1	0.725643	0.306655	0.647228	0.522189	1.17427	0.241733	583	_	_	_	_	_	_	_	_	_	_	_	_	_	_	_	_	_	_	_	_	_
TRINITY_DN10147_c0_g2	0.931001	0.576565	0	0	0	0.200434	395	_	_	_	_	_	_	_	_	_	_	_	_	_	_	_	_	_	_	_	_	_
TRINITY_DN10147_c1_g1	0	0.666745	0.432618	0	0.587509	0	746	_	_	_	_	_	_	_	_	_	_	_	_	_	_	_	_	_	_	m.524|TRINITY_DN10147_c1_g1:384-746(+)	3prime_partial	_
TRINITY_DN10147_c2_g1	1.95833	0.538171	0.96453	0	0	0.275246	353	_	_	_	_	_	_	_	_	_	_	_	_	_	_	_	_	_	_	_	_	_
TRINITY_DN10147_c3_g1	0.283382	1.16224	0.558871	0.209678	0	0	370	_	_	_	_	_	_	_	_	_	_	_	_	_	_	_	_	_	_	_	_	_
TRINITY_DN10148_c0_g1	0	0.128286	0.123097	0.101919	0	0	3047	XP_031341905.1	XP_031341905.1 SCAN domain-containing protein 3-like [Photinus pyralis]	93	_	_	_	_	_	_	_	_	_	_	_	_	_	_	_	m.485|TRINITY_DN10148_c0_g1:399-719(+);m.484|TRINITY_DN10148_c0_g1:1291-2724(+)	complete;complete	PF14291.3|DUF4371|Domain of unknown function (DUF4371)|TRINITY_DN10148_c0_g1_i1|m.484:12-130;PF05699.11|Dimer_Tnp_hAT|hAT family C-terminal dimerisation region|TRINITY_DN10148_c0_g1_i1|m.484:400-453;PF02892.12|zf-BED|BED zinc finger|TRINITY_DN10148_c0_g1_i1|m.485:41-76
TRINITY_DN10149_c0_g1	12.4647	23.8951	0	0	0	19.7553	369	_	_	_	_	_	_	_	_	_	_	_	_	_	_	_	_	_	_	_	_	_
TRINITY_DN1014_c0_g1	6.18915	16.2303	5.10654	9.45519	7.97619	12.7286	3034	XP_022837105.1	XP_022837105.1 plastin-2 isoform X2 [Spodoptera litura]	92.5	_	_	_	_	_	_	_	_	_	_	_	_	ko:K17336	PLS3		m.590|TRINITY_DN1014_c0_g1:304-2457(+)	complete	PF00307.28|CH|Calponin homology (CH) domain|TRINITY_DN1014_c0_g1_i5|m.590:133-246;PF00307.28|CH|Calponin homology (CH) domain|TRINITY_DN1014_c0_g1_i5|m.590:277-380;PF00307.28|CH|Calponin homology (CH) domain|TRINITY_DN1014_c0_g1_i5|m.590:401-506;PF00307.28|CH|Calponin homology (CH) domain|TRINITY_DN1014_c0_g1_i5|m.590:523-625;PF11971.5|CAMSAP_CH|CAMSAP CH domain|TRINITY_DN1014_c0_g1_i5|m.590:163-…
TRINITY_DN1014_c0_g2	1.15589	3.69756	3.3616	0.897506	3.23207	1.76823	290	_	_	_	_	_	_	_	_	_	_	_	_	_	_	_	_	_	_	_	_	_
TRINITY_DN1014_c0_g3	8.14026	7.84767	8.54516	15.0323	6.87067	10.225	438	_	_	_	_	_	_	_	_	_	_	_	_	_	_	_	_	_	_	_	_	_
TRINITY_DN1014_c0_g4	2.09485	7.69473	1.06005	9.60335	4.49589	8.2244	3397	PCG76767.1	PCG76767.1 hypothetical protein B5V51_8755 [Heliothis virescens]	90.1	sp|P52192|IRK1_CAEEL	sp|P52192|IRK1_CAEEL Inward rectifier potassium channel irk-1 OS=Caenorhabditis elegans OX=6239 GN=irk-1 PE=2 SV=2	55.9	_	_	_	_	_	_	GO:0008277|regulation of G protein-coupled receptor signaling pathway;GO:0034765|regulation of ion transmembrane transport;GO:0046662|regulation of oviposition;GO:1990573|potassium ion import across plasma membrane	GO:0005886|plasma membrane;GO:0016021|integral component of membrane;GO:0043005|neuron projection;GO:0043025|neuronal cell body;GO:0043204|perikaryon	GO:0005242|inward rectifier potassium channel activity	ko:K05330	KCNJN		m.592|TRINITY_DN1014_c0_g4:571-2451(+)	complete	PF01007.17|IRK|Inward rectifier potassium channel|TRINITY_DN1014_c0_g4_i1|m.592:230-549;PF07885.13|Ion_trans_2|Ion channel|TRINITY_DN1014_c0_g4_i1|m.592:275-364
TRINITY_DN1014_c11_g1	5.09675	7.74964	10.2857	9.07295	6.39205	5.78406	864	_	_	_	_	_	_	_	_	_	_	_	_	_	_	_	_	_	_	_	_	_
TRINITY_DN1014_c12_g1	9.9685	10.0875	8.12566	7.45311	7.66347	2.20429	722	XP_032512080.1	XP_032512080.1 craniofacial development protein 2-like, partial [Danaus plexippus plexippus]	77.3	_	_	_	_	_	_	_	_	_	_	_	_	_	_	_	_	_	_
TRINITY_DN1014_c14_g1	0	0	0	0.585735	0	0.641536	212	_	_	_	_	_	_	_	_	_	_	_	_	_	_	_	_	_	_	_	_	_
TRINITY_DN1014_c1_g1	0.556455	0.664237	0.386012	0.537687	1.03429	0.602561	8730	GBP23099.1	GBP23099.1 hypothetical protein EVAR_13119_1 [Eumeta japonica]	61	_	_	_	_	_	_	_	_	_	_	_	_	_	_	_	_	_	_
TRINITY_DN1014_c20_g1	1.94021	0	0.944088	0.725997	0	0	216	_	_	_	_	_	_	_	_	_	_	_	_	_	_	_	_	_	_	_	_	_
TRINITY_DN1014_c2_g1	5.77734	5.24643	4.3303	3.31679	3.22393	1.34366	2711	_	_	_	_	_	_	_	_	_	_	_	_	_	_	_	_	_	_	_	_	_
TRINITY_DN1014_c2_g2	9.29797	5.09743	4.6538	2.14561	6.32436	3.98968	898	ADZ95811.1	ADZ95811.1 reverse transcriptase, partial [Agrotis exclamationis]	84.3	_	_	_				_	KOG1075	_	_	_	_	_	_	_	_	_	_
TRINITY_DN1014_c2_g3	0	0	0	0	0	0	1983	XP_014371731.1	XP_014371731.1 PREDICTED: uncharacterized protein LOC106721325, partial [Papilio machaon]	68.3	_	_	_				_	KOG1075	_	_	_	_	_	_	_	_	_	_
TRINITY_DN1014_c2_g4	4.32638	1.36868	3.20464	7.40752	1.94745	5.49044	1984	GBP88978.1	GBP88978.1 hypothetical protein EVAR_87750_1 [Eumeta japonica]	81.6	_	_	_	_	_	_	_	_	_	_	_	_	_	_	_	_	_	_
TRINITY_DN1014_c2_g5	0.681277	1.32839	0.368753	1.09534	1.41071	0.827825	945	GBP36451.1	GBP36451.1 hypothetical protein EVAR_88031_1 [Eumeta japonica]	76.1	_	_	_	_	_	_	_	_	_	_	_	_	_	_	_	_	_	_
TRINITY_DN1014_c31_g1	1.96292	1.86536	1.13936	2.22612	2.1172	1.40645	706	_	_	_	_	_	_	_	_	_	_	_	_	_	_	_	_	_	_	_	_	_
TRINITY_DN1014_c38_g1	3.34297	1.6842	2.69362	3.78184	2.4171	1.03966	389	PZC71223.1	PZC71223.1 hypothetical protein B5X24_HaOG213914, partial [Helicoverpa armigera]	78.8	_	_	_	_	_	_	_	_	_	_	_	_	_	_	_	_	_	_
TRINITY_DN1014_c3_g1	0	4.9826	0	5.79391	0	2.16994	957	_	_	_	_	_	_	_	_	_	_	_	_	_	_	_	_	_	_	_	_	_
TRINITY_DN1014_c4_g1	4.58656	3.24296	4.75677	6.20761	4.3276	3.29894	478	_	_	_	_	_	_	_	_	_	_	_	_	_	_	_	_	_	_	_	_	_
TRINITY_DN1014_c4_g2	1.19682	2.24731	3.446	1.8177	2.39449	2.15564	487	_	_	_	_	_	_	_	_	_	_	_	_	_	_	_	_	_	_	_	_	_
TRINITY_DN1014_c54_g1	13.8731	0	0	6.01316	0	7.28003	399	PCG76852.1	PCG76852.1 hypothetical protein B5V51_8523 [Heliothis virescens]	95.8	_	_	_	_	_	_	_	_	_	_	_	_	_	_	_	_	_	_
TRINITY_DN1014_c55_g1	0	0	0	0.334504	0	0	305	_	_	_	_	_	_	_	_	_	_	_	_	_	_	_	_	_	_	_	_	_
TRINITY_DN1014_c56_g1	2.67599	4.18277	0	0	1.07268	0.517554	251	_	_	_	_	_	_	_	_	_	_	_	_	_	_	_	_	_	_	_	_	_
TRINITY_DN1014_c57_g1	0	0	0	0.873201	1.10253	0	257	_	_	_	_	_	_	_	_	_	_	_	_	_	_	_	_	_	_	_	_	_
TRINITY_DN1014_c5_g1	16.2185	26.3495	18.7032	15.8381	23.8094	5.77424	292	_	_	_	_	_	_	_	_	_	_	_	_	_	_	_	_	_	_	_	_	_
TRINITY_DN1014_c5_g2	48.5586	24.7588	36.0728	26.3441	9.38284	16.0256	322	_	_	_	_	_	_	_	_	_	_	_	_	_	_	_	_	_	_	_	_	_
TRINITY_DN1014_c6_g1	6.96524	14.0481	7.71233	13.7569	3.6186	17.5361	1078	_	_	_	_	_	_	_	_	_	_	_	_	_	_	_	_	_	_	_	_	_
TRINITY_DN1014_c7_g1	91.9859	95.1204	132.443	54.0349	60.6721	43.7032	453	_	_	_	_	_	_	_	_	_	_	_	_	_	_	_	_	_	_	_	_	_
TRINITY_DN1014_c8_g1	9.13312	5.73714	5.06346	9.0696	3.0818	5.13784	544	XP_014358783.1	XP_014358783.1 PREDICTED: uncharacterized protein LOC106711071 [Papilio machaon]	85.2	_	_	_	_	_	_	_	_	_	_	_	_	_	_	_	m.605|TRINITY_DN1014_c8_g1:3-389(+)	5prime_partial	PF00078.24|RVT_1|Reverse transcriptase (RNA-dependent DNA polymerase)|TRINITY_DN1014_c8_g1_i12|m.605:1-124
TRINITY_DN10150_c0_g1	0	51.2916	54.6402	0	0	0	301	_	_	_	_	_	_	_	_	_	_	_	_	_	_	_	_	_	_	_	_	_
TRINITY_DN10151_c0_g1	0.301768	0.126213	0.4439	2.01723	3.31249	0.404571	470	_	_	_	_	_	_	_	_	_	_	_	_	_	_	_	_	_	_	_	_	_
TRINITY_DN10153_c0_g1	7.47029	13.257	7.05609	3.91942	489.089	1.13102	1601	XP_035456002.1	XP_035456002.1 uncharacterized protein LOC118280218 [Spodoptera frugiperda]	95.9	_	_	_	_	_	_	_	_	_	_	_	_	_	_	_	m.463|TRINITY_DN10153_c0_g1:329-772(+)	complete	PF15430.3|SVWC|Single domain von Willebrand factor type C|TRINITY_DN10153_c0_g1_i3|m.463:44-119
TRINITY_DN10153_c1_g1	429.102	395.389	442.069	864.256	806.249	1067.61	906	XP_022116927.1	XP_022116927.1 nuclear protein 1 [Pieris rapae]	100	_	_	_	_	_	_	_	_	_	_	_	_	ko:K15626	NUPR1, COM1	path:ko05202	_	_	_
TRINITY_DN10154_c0_g1	4.70616	0	3.15998	4.9577	2.53709	3.96446	317	_	_	_	_	_	_	_	_	_	_	_	_	_	_	_	_	_	_	_	_	_
TRINITY_DN10155_c0_g1	4.75761	4.81156	4.6069	2.73514	2.87479	1.48181	2298	_	_	_	_	_	_	_	_	_	_	_	_	_	_	_	_	_	_	_	_	_
TRINITY_DN10156_c0_g1	0	1.27433	0	4.8472	0	2.33852	422	_	_	_	_	_	_	_	_	_	_	_	_	_	_	_	_	_	_	_	_	_
TRINITY_DN10157_c0_g1	5.08123	1.42943	2.54819	4.93026	0	0.490168	367	_	_	_	_	_	_	_	_	_	_	_	_	_	_	_	_	_	_	_	_	_
TRINITY_DN10158_c0_g1	1.79375	1.05681	0	1.78531	2.06724	0.769408	323	_	_	_	_	_	_	_	_	_	_	_	_	_	_	_	_	_	_	_	_	_
TRINITY_DN10159_c0_g1	1.23504	5.33959	1.26009	0	0	0	558	KAF9808449.1	KAF9808449.1 hypothetical protein SFRURICE_008502, partial [Spodoptera frugiperda]	96.6	_	_	_	_	_	_	_	_	_	_	_	_	_	_	_	_	_	_
TRINITY_DN1015_c0_g1	1.5534	1.41972	1.44226	1.3483	26.6335	1.87464	3068	_	_	_	_	_	_	_	_	_	_	_	_	_	_	_	_	_	_	_	_	_
TRINITY_DN10160_c0_g1	0	0.507603	0.277848	0	0.075391	0	4717	_	_	_	_	_	_	_	_	_	_	_	_	_	_	_	_	_	_	_	_	_
TRINITY_DN10161_c0_g1	3.34521	3.11557	3.05774	0	0	0	620	_	_	_	_	_	_	_	_	_	_	_	_	_	_	_	_	_	_	_	_	_
TRINITY_DN10162_c0_g1	0	0.328846	0.432748	0	1.46702	0	937	XP_021192484.1	XP_021192484.1 uncharacterized protein LOC110377791 [Helicoverpa armigera]	60.1	_	_	_	_	_	_	_	_	_	_	_	_	_	_	_	m.444|TRINITY_DN10162_c0_g1:1-804(+)	5prime_partial	PF10545.6|MADF_DNA_bdg|Alcohol dehydrogenase transcription factor Myb/SANT-like|TRINITY_DN10162_c0_g1_i2|m.444:37-136;PF02944.17|BESS|BESS motif|TRINITY_DN10162_c0_g1_i2|m.444:217-251
TRINITY_DN10163_c0_g1	3.31605	3.32425	3.97696	1.33476	3.54539	0.347815	307	_	_	_	_	_	_	_	_	_	_	_	_	_	_	_	_	_	_	_	_	_
TRINITY_DN10164_c0_g1	0	0.439312	0.327182	0	0	0	2056	XP_022821305.1	XP_022821305.1 protein white-like isoform X1 [Spodoptera litura]	94.1	sp|P10090|WHITE_DROME	sp|P10090|WHITE_DROME Protein white OS=Drosophila melanogaster OX=7227 GN=w PE=2 SV=2	51.4	_	_	_	_	_	_	GO:0006727|ommochrome biosynthetic process;GO:0006856|eye pigment precursor transport;GO:0007613|memory;GO:0008049|male courtship behavior;GO:0015842|aminergic neurotransmitter loading into synaptic vesicle;GO:0042332|gravitaxis;GO:0042401|cellular biogenic amine biosynthetic process;GO:0042441|eye pigment metabolic process;GO:0048072|compound eye pigmentation;GO:0051615|histamine uptake;GO:00550…	GO:0005886|plasma membrane;GO:0031410|cytoplasmic vesicle;GO:0048770|pigment granule;GO:0090740|integral component of pigment granule membrane;GO:0098793|presynapse	GO:0005275|amine transmembrane transporter activity;GO:0005524|ATP binding;GO:0008558|ABC-type guanine transporter activity;GO:0015196|L-tryptophan transmembrane transporter activity;GO:0016887|ATPase activity;GO:0031409|pigment binding;GO:1905948|ABC-type 3',5'-cyclic GMP transmembrane transporter activity	ko:K21396	WHT		m.491|TRINITY_DN10164_c0_g1:217-2001(+)	complete	PF00005.24|ABC_tran|ABC transporter|TRINITY_DN10164_c0_g1_i6|m.491:45-187;PF01061.21|ABC2_membrane|ABC-2 type transporter|TRINITY_DN10164_c0_g1_i6|m.491:318-527
TRINITY_DN10165_c0_g1	0.935243	1.36659	0.849684	0.933644	1.58071	0.857782	2238	_	_	_	_	_	_	_	_	_	_	_	_	_	_	_	_	_	_	_	_	_
TRINITY_DN10166_c0_g1	0	0.20293	0.027294	0.01836	0.301349	0.070641	1327	_	_	_	_	_	_	_	_	_	_	_	_	_	_	_	_	_	_	_	_	_
TRINITY_DN10166_c0_g2	0	0.926918	0	0	0	0	291	_	_	_	_	_	_	_	_	_	_	_	_	_	_	_	_	_	_	_	_	_
TRINITY_DN10166_c0_g3	0.77357	0.644196	0.20563	0.614881	0.27931	0.142239	972	_	_	_	_	_	_	_	_	_	_	_	_	_	_	_	_	_	_	_	_	_
TRINITY_DN10166_c0_g4	0	0.141467	0.426683	0.299574	0.289342	0.369901	609	_	_	_	_	_	_	_	_	_	_	_	_	_	_	_	_	_	_	_	_	_
TRINITY_DN10166_c1_g1	0	0	1.68066	0.293507	1.09052	0	325	_	_	_	_	_	_	_	_	_	_	_	_	_	_	_	_	_	_	_	_	_
TRINITY_DN10166_c1_g2	0	0	0.530367	1.0344	2.91615	0.808241	300	_	_	_	_	_	_	_	_	_	_	_	_	_	_	_	_	_	_	_	_	_
TRINITY_DN10167_c0_g1	0	9.21688	6.75134	0	4.09682	0	342	_	_	_	_	_	_	_	_	_	_	_	_	_	_	_	_	_	_	_	_	_
TRINITY_DN10168_c0_g1	13.9528	15.1848	10.99	9.97867	13.3259	7.70958	4405	_	_	_	_	_	_	_	_	_	_	_	_	_	_	_	_	_	_	_	_	_
TRINITY_DN10169_c0_g1	0.085954	1.80345	0	1.70639	0	0.568337	1235	_	_	_	_	_	_	_	_	_	_	_	_	_	_	_	_	_	_	_	_	_
TRINITY_DN1016_c0_g1	0	14.7468	0	0	18.1021	0	907	_	_	_	_	_	_	_	_	_	_	_	_	_	_	_	_	_	_	_	_	_
TRINITY_DN10170_c0_g1	0.022467	0.113152	0	0.108311	0.086928	0.078137	1931	PCG76827.1	PCG76827.1 hypothetical protein B5V51_8598 [Heliothis virescens]	96.2	sp|B7YZU2|LINT_DROME	sp|B7YZU2|LINT_DROME Serine protease filzig OS=Drosophila melanogaster OX=7227 GN=flz PE=2 SV=1	59.1	_	_	_	_	_	_	GO:0006508|proteolysis;GO:0035149|lumen formation, open tracheal system;GO:0060439|trachea morphogenesis	GO:0005886|plasma membrane;GO:0016021|integral component of membrane;GO:0098595|perivitelline space	GO:0004252|serine-type endopeptidase activity	_	_	_	m.518|TRINITY_DN10170_c0_g1:1-1122(+)	5prime_partial	PF00089.23|Trypsin|Trypsin|TRINITY_DN10170_c0_g1_i1|m.518:131-367
TRINITY_DN10170_c1_g1	0	0.296839	0.358495	0.489609	0.878244	0.299931	342	_	_	_	_	_	_	_	_	_	_	_	_	_	_	_	_	_	_	_	_	_
TRINITY_DN10171_c0_g1	1.87901	2.57233	2.6759	0.620063	1.31886	0.541927	410	_	_	_	_	_	_	_	_	_	_	_	_	_	_	_	_	_	_	_	_	_
TRINITY_DN10171_c0_g2	0.075357	0.152062	0.052595	0.106051	0.18081	0	1367	GBP71338.1	GBP71338.1 hypothetical protein EVAR_57722_1 [Eumeta japonica]	58.8	_	_	_	_	_	_	_	_	_	_	_	_	_	_	_	m.426|TRINITY_DN10171_c0_g2:739-1365(+)	3prime_partial	_
TRINITY_DN10171_c0_g3	0	5.20578	0.357196	0	0	0	432	_	_	_	_	_	_	_	_	_	_	_	_	_	_	_	_	_	_	_	_	_
TRINITY_DN10171_c0_g4	0.394206	0	0	0.071109	0.084774	0.087397	559	_	_	_	_	_	_	_	_	_	_	_	_	_	_	_	_	_	_	_	_	_
TRINITY_DN10171_c0_g5	0	2.75573	0	0	0	0	364	_	_	_	_	_	_	_	_	_	_	_	_	_	_	_	_	_	_	_	_	_
TRINITY_DN10171_c1_g1	0	0	0	0.44123	0.559228	0	255	_	_	_	_	_	_	_	_	_	_	_	_	_	_	_	_	_	_	_	_	_
TRINITY_DN10171_c2_g1	0	0	0.757986	0	0	0.62798	336	_	_	_	_	_	_	_	_	_	_	_	_	_	_	_	_	_	_	_	_	_
TRINITY_DN10171_c3_g1	0.221702	0.158879	0.3075	0.130328	0.032634	0.132882	1021	_	_	_	_	_	_	_	_	_	_	_	_	_	_	_	_	_	_	_	_	_
TRINITY_DN10171_c4_g1	0	1.0285	0.41624	0	0	1.01512	326	_	_	_	_	_	_	_	_	_	_	_	_	_	_	_	_	_	_	_	_	_
TRINITY_DN10171_c5_g1	0	0	0	0	0	1.63493	240	_	_	_	_	_	_	_	_	_	_	_	_	_	_	_	_	_	_	_	_	_
TRINITY_DN10172_c0_g1	0.642698	0.413788	0.174588	0	0	0.192217	684	_	_	_	_	_	_	_	_	_	_	_	_	_	_	_	_	_	_	_	_	_
TRINITY_DN10172_c1_g1	0.432152	0	0	0	0	0	538	_	_	_	_	_	_	_	_	_	_	_	_	_	_	_	_	_	_	_	_	_
TRINITY_DN10172_c1_g2	0	0.822748	0	1.48397	0	0	475	_	_	_	_	_	_	_	_	_	_	_	_	_	_	_	_	_	_	_	_	_
TRINITY_DN10172_c2_g1	5.75563	2.29303	0	0.599902	3.54311	0.655308	209	_	_	_	_	_	_	_	_	_	_	_	_	_	_	_	_	_	_	_	_	_
TRINITY_DN10173_c0_g1	0.294116	0.343576	0.241695	0.223524	0.296622	0.219608	2417	_	_	_	_	_	_	_	_	_	_	_	_	_	_	_	_	_	_	_	_	_
TRINITY_DN10173_c1_g1	0	0	0	0.146809	0	0	937	KAF9813304.1	KAF9813304.1 hypothetical protein SFRURICE_015786, partial [Spodoptera frugiperda]	80	_	_	_	_	_	_	_	_	_	_	_	_	_	_	_	_	_	_
TRINITY_DN10174_c0_g1	0.88889	0.937078	0.699947	0.906379	1.25755	0.545821	1253	_	_	_	_	_	_	_	_	_	_	_	_	_	_	_	_	_	_	_	_	_
TRINITY_DN10174_c0_g2	0	0	0	0	2.72693	0	338	_	_	_	_	_	_	_	_	_	_	_	_	_	_	_	_	_	_	_	_	_
TRINITY_DN10174_c1_g1	0.442576	0	0.914588	0	0.365499	0.363478	316	_	_	_	_	_	_	_	_	_	_	_	_	_	_	_	_	_	_	_	_	_
TRINITY_DN10175_c0_g1	2.10443	1.57303	0.834344	2.26559	1.20176	2.21299	454	_	_	_	_	_	_	_	_	_	_	_	_	_	_	_	_	_	_	_	_	_
TRINITY_DN10175_c0_g2	0.289652	0.481978	0.144881	0.318743	0.122293	0.381426	470	_	_	_	_	_	_	_	_	_	_	_	_	_	_	_	_	_	_	_	_	_
TRINITY_DN10176_c0_g1	0.183162	0.259236	0.176605	0.094891	0.187388	0.534717	924	_	_	_	_	_	_	_	_	_	_	_	_	_	_	_	_	_	_	_	_	_
TRINITY_DN10177_c0_g1	0.417363	0	0	0	3.91872	0.180642	410	_	_	_	_	_	_	_	_	_	_	_	_	_	_	_	_	_	_	_	_	_
TRINITY_DN10177_c1_g1	0	0	0	0.803074	2.3197	0	234	_	_	_	_	_	_	_	_	_	_	_	_	_	_	_	_	_	_	_	_	_
TRINITY_DN10177_c2_g1	0	1.2033	0	0	0	0	252	_	_	_	_	_	_	_	_	_	_	_	_	_	_	_	_	_	_	_	_	_
TRINITY_DN10178_c0_g1	0.268189	0.374903	0.135996	0.370768	0.230868	0.117669	907	_	_	_	_	_	_	_	_	_	_	_	_	_	_	_	_	_	_	_	_	_
TRINITY_DN10179_c0_g1	0	0.081311	0	0.166663	0	0	2458	XP_021191588.1	XP_021191588.1 protein tramtrack, beta isoform-like isoform X9 [Helicoverpa armigera]	90.5	_	_	_	_	_	_	_	_	_	_	_	_	_	_	_	m.476|TRINITY_DN10179_c0_g1:1268-1687(+)	complete	PF04500.13|FLYWCH|FLYWCH zinc finger domain|TRINITY_DN10179_c0_g1_i2|m.476:35-87
TRINITY_DN1017_c0_g1	0.39562	2.29024	0.063701	2.59207	93.6377	40.2775	1176	XP_021194353.1	XP_021194353.1 brachyurin-like [Helicoverpa armigera]	86.9	sp|Q00871|CTRB1_PENVA	sp|Q00871|CTRB1_PENVA Chymotrypsin BI OS=Penaeus vannamei OX=6689 PE=1 SV=1	54.2	_	_	_	_	_	_	GO:0030574|collagen catabolic process	GO:0005615|extracellular space	GO:0004252|serine-type endopeptidase activity	_	_	_	m.3232|TRINITY_DN1017_c0_g1:3-887(+)	5prime_partial	PF00089.23|Trypsin|Trypsin|TRINITY_DN1017_c0_g1_i2|m.3232:59-290
TRINITY_DN1017_c0_g2	0.151914	0.158328	0.103176	0.236086	0.156975	0.021138	1810	_	_	_	_	_	_	_	_	_	_	_	_	_	_	_	_	_	_	_	_	_
TRINITY_DN1017_c1_g1	0	0	0.809387	0	0	0	329	_	_	_	_	_	_	_	_	_	_	_	_	_	_	_	_	_	_	_	_	_
TRINITY_DN1017_c2_g1	0.326388	0.538171	0.972716	0.36982	0	0.275246	353	_	_	_	_	_	_	_	_	_	_	_	_	_	_	_	_	_	_	_	_	_
TRINITY_DN1017_c2_g2	0.097288	0.027928	0.033793	0.170256	0.086127	0.087555	1124	_	_	_	_	_	_	_	_	_	_	_	_	_	_	_	_	_	_	_	_	_
TRINITY_DN10180_c0_g1	0.162634	0.198975	0.169988	0	0.647418	0.114431	788	_	_	_	_	_	_	_	_	_	_	_	_	_	_	_	_	_	_	_	_	_
TRINITY_DN10180_c1_g1	0	0	0	5.29349	4.19577	0	346	_	_	_	_	_	_	_	_	_	_	_	_	_	_	_	_	_	_	_	_	_
TRINITY_DN10180_c2_g1	1.74341	0	0	0.307839	0	0	318	_	_	_	_	_	_	_	_	_	_	_	_	_	_	_	_	_	_	_	_	_
TRINITY_DN10180_c3_g1	0	0	0	0	0	0	210	_	_	_	_	_	_	_	_	_	_	_	_	_	_	_	_	_	_	_	_	_
TRINITY_DN10181_c0_g1	1.02523	0.34189	0	0.491577	0	0	519	KAF9793965.1	KAF9793965.1 hypothetical protein SFRURICE_015617 [Spodoptera frugiperda]	97.6	sp|P91660|L259_DROME	sp|P91660|L259_DROME Probable multidrug resistance-associated protein lethal(2)03659 OS=Drosophila melanogaster OX=7227 GN=l(2)03659 PE=2 SV=4	76.8	_	_	_	_	_	_	GO:0007275|multicellular organism development;GO:0015711|organic anion transport;GO:0055085|transmembrane transport	GO:0016020|membrane;GO:0016021|integral component of membrane	GO:0005524|ATP binding;GO:0008514|organic anion transmembrane transporter activity;GO:0015562|efflux transmembrane transporter activity;GO:0016887|ATPase activity;GO:0042626|ATPase-coupled transmembrane transporter activity	_	_	_	m.474|TRINITY_DN10181_c0_g1:1-513(+)	5prime_partial	PF00005.24|ABC_tran|ABC transporter|TRINITY_DN10181_c0_g1_i2|m.474:30-125
TRINITY_DN10182_c0_g1	0	0	0	0	3.80491	3.86311	402	_	_	_	_	_	_	_	_	_	_	_	_	_	_	_	_	_	_	_	_	_
TRINITY_DN10183_c0_g1	0.222017	0.071852	0.379491	0.158739	0.138433	0.212087	651	_	_	_	_	_	_	_	_	_	_	_	_	_	_	_	_	_	_	_	_	_
TRINITY_DN10184_c0_g1	0	0	13.396	9.40937	16.6939	6.99177	285	_	_	_	_	_	_	_	_	_	_	_	_	_	_	_	_	_	_	_	_	_
TRINITY_DN10185_c0_g1	41.6008	0	42.1963	35.2226	0	0	429	_	_	_	_	_	_	_	_	_	_	_	_	_	_	_	_	_	_	_	_	_
TRINITY_DN10186_c0_g1	0.121991	0.058514	0.052656	0.143783	0.027991	0	2520	KYQ47589.1	KYQ47589.1 3-hydroxyacyl-CoA dehydrogenase type-2, partial [Trachymyrmex zeteki]	71.7	_	_	_	_	_	_	_	_	_	_	_	_	_	_	_	m.459|TRINITY_DN10186_c0_g1:762-2294(+)	complete	_
TRINITY_DN10186_c1_g1	0.987628	0	1.30875	0.482379	0.808563	0	352	_	_	_	_	_	_	_	_	_	_	_	_	_	_	_	_	_	_	_	_	_
TRINITY_DN10187_c0_g1	0.797244	10.8555	30.2601	2.91754	18.2393	0	214	_	_	_	_	_	_	_	_	_	_	_	_	_	_	_	_	_	_	_	_	_
TRINITY_DN10188_c0_g1	0.199601	0.10934	0.226662	0.249325	0.30022	0	2757	KAF9807787.1	KAF9807787.1 hypothetical protein SFRURICE_000568 [Spodoptera frugiperda]	83.1	_	_	_	_	_	_	_	_	_	_	_	_	_	_	_	_	_	_
TRINITY_DN10188_c1_g1	0.099429	0.250952	0.130062	0.088519	0.494531	0.01875	936	_	_	_	_	_	_	_	_	_	_	_	_	_	_	_	_	_	_	_	_	_
TRINITY_DN10189_c0_g1	0	4.28754	6.94842	0	0	2.90834	380	_	_	_	_	_	_	_	_	_	_	_	_	_	_	_	_	_	_	_	_	_
TRINITY_DN1018_c0_g1	32.1875	22.6053	24.8966	3.97324	4.79964	1.77487	3323	VVD03283.1	VVD03283.1 unnamed protein product [Leptidea sinapis]	57.1	_	_	_	_	_	_	_	_	_	_	_	_	_	_	_	_	_	_
TRINITY_DN10190_c0_g1	6.69608	3.8503	4.8543	4.96166	7.30241	0.42356	267	_	_	_	_	_	_	_	_	_	_	_	_	_	_	_	_	_	_	_	_	_
TRINITY_DN10191_c0_g1	0.045436	0.740349	0.565332	0	0	0.040774	883	_	_	_	_	_	_	_	_	_	_	_	_	_	_	_	_	_	_	_	_	_
TRINITY_DN10192_c0_g1	0.229281	7.73458	3.27068	0.522311	8.18794	1.61547	397	PZC83663.1	PZC83663.1 hypothetical protein B5X24_HaOG207190 [Helicoverpa armigera]	96.2	sp|Q9VUQ5|AGO2_DROME	sp|Q9VUQ5|AGO2_DROME Protein argonaute-2 OS=Drosophila melanogaster OX=7227 GN=AGO2 PE=1 SV=3	61.2	_	_	_	_	_	_	GO:0007279|pole cell formation;GO:0007349|cellularization;GO:0007367|segment polarity determination;GO:0009047|dosage compensation by hyperactivation of X chromosome;GO:0010526|negative regulation of transposition, RNA-mediated;GO:0016032|viral process;GO:0016246|RNA interference;GO:0030422|production of siRNA involved in RNA interference;GO:0033227|dsRNA transport;GO:0035087|siRNA loading onto R…	GO:0005634|nucleus;GO:0005737|cytoplasm;GO:0005829|cytosol;GO:0016442|RISC complex;GO:0070578|RISC-loading complex;GO:0071598|neuronal ribonucleoprotein granule;GO:1990124|messenger ribonucleoprotein complex	GO:0003727|single-stranded RNA binding;GO:0004521|endoribonuclease activity;GO:0035197|siRNA binding;GO:0046872|metal ion binding;GO:0070551|endoribonuclease activity, cleaving siRNA-paired mRNA	ko:K11593	ELF2C, AGO		m.489|TRINITY_DN10192_c0_g1:1-396(+)	internal	PF02171.14|Piwi|Piwi domain|TRINITY_DN10192_c0_g1_i1|m.489:12-118
TRINITY_DN10193_c0_g1	1.31072	0.926123	1.85446	1.38772	1.71413	1.8061	426	_	_	_	_	_	_	_	_	_	_	_	_	_	_	_	_	_	_	_	_	_
TRINITY_DN10194_c0_g1	0	0	0	0	0	0.306927	339	_	_	_	_	_	_	_	_	_	_	_	_	_	_	_	_	_	_	_	_	_
TRINITY_DN10194_c0_g2	0.155355	0.25782	0	0	0.653342	0	457	_	_	_	_	_	_	_	_	_	_	_	_	_	_	_	_	_	_	_	_	_
TRINITY_DN10194_c1_g1	0.439217	0.371578	0	0.309872	0.724882	0.721982	317	_	_	_	_	_	_	_	_	_	_	_	_	_	_	_	_	_	_	_	_	_
TRINITY_DN10194_c1_g2	0	0.067911	0	0	0.092807	0	973	_	_	_	_	_	_	_	_	_	_	_	_	_	_	_	_	_	_	_	_	_
TRINITY_DN10194_c2_g1	0	0.310441	0	0	0	0	337	_	_	_	_	_	_	_	_	_	_	_	_	_	_	_	_	_	_	_	_	_
TRINITY_DN10194_c3_g1	0.480655	0.298943	0	0.571645	0.305352	0	591	_	_	_	_	_	_	_	_	_	_	_	_	_	_	_	_	_	_	_	_	_
TRINITY_DN10194_c4_g1	0	0	1.60572	0	0	0	299	_	_	_	_	_	_	_	_	_	_	_	_	_	_	_	_	_	_	_	_	_
TRINITY_DN10195_c0_g1	6.69446	10.0267	1.08084	2.41677	8.88253	5.80418	307	_	_	_	_	_	_	_	_	_	_	_	_	_	_	_	_	_	_	_	_	_
TRINITY_DN10196_c0_g1	0.386273	0.381947	0.354789	1.03679	0.662731	0.835073	1453	PCG68100.1	PCG68100.1 hypothetical protein B5V51_5604 [Heliothis virescens]	65.4	_	_	_	_	_	_	_	_	_	_	_	_	_	_	_	m.427|TRINITY_DN10196_c0_g1:48-1310(+)	complete	_
TRINITY_DN10197_c0_g1	0.60284	0.93824	0.324969	0.432433	0.40642	0.388852	2201	XP_022820843.1	XP_022820843.1 phosphatidylinositol-glycan biosynthesis class W protein-like [Spodoptera litura]	89.7	_	_	_	_	_	_	_	_	_	_	_	_	ko:K05283	PIGW	path:ko00563;path:ko01100	m.422|TRINITY_DN10197_c0_g1:244-1554(+)	complete	PF06423.9|GWT1|GWT1|TRINITY_DN10197_c0_g1_i2|m.422:273-398
TRINITY_DN10198_c0_g1	0	0	0	0	0	0	2102	_	_	_	_	_	_	_	_	_	_	_	_	_	_	_	_	_	_	_	_	_
TRINITY_DN10198_c0_g2	0.979723	0	0	0.259826	0.55327	0	547	_	_	_	_	_	_	_	_	_	_	_	_	_	_	_	_	_	_	_	_	_
TRINITY_DN10198_c1_g1	0.77327	0	0	0	0	0	219	_	_	_	_	_	_	_	_	_	_	_	_	_	_	_	_	_	_	_	_	_
TRINITY_DN10199_c0_g1	0	1.0364	0.651454	0.788686	0	0.922383	276	_	_	_	_	_	_	_	_	_	_	_	_	_	_	_	_	_	_	_	_	_
TRINITY_DN1019_c0_g1	0	9.73569	7.16551	0	4.60169	0	797	_	_	_	_	_	_	_	_	_	_	_	_	_	_	_	_	_	_	_	_	_
TRINITY_DN101_c0_g1	0	0	0	0	0	0	11973	ARB18436.1	ARB18436.1 clock [Mythimna separata]	99.5	sp|O61735|CLOCK_DROME	sp|O61735|CLOCK_DROME Circadian locomoter output cycles protein kaput OS=Drosophila melanogaster OX=7227 GN=Clk PE=1 SV=3	76.3	_	_	_	_	_	_	GO:0000122|negative regulation of transcription by RNA polymerase II;GO:0003053|circadian regulation of heart rate;GO:0006357|regulation of transcription by RNA polymerase II;GO:0007622|rhythmic behavior;GO:0007623|circadian rhythm;GO:0008062|eclosion rhythm;GO:0009266|response to temperature stimulus;GO:0009416|response to light stimulus;GO:0009649|entrainment of circadian clock;GO:0032922|circa…	GO:0005634|nucleus;GO:0005654|nucleoplasm;GO:0005737|cytoplasm;GO:1990513|CLOCK-BMAL transcription complex	GO:0000978|RNA polymerase II cis-regulatory region sequence-specific DNA binding;GO:0000981|DNA-binding transcription factor activity, RNA polymerase II-specific;GO:0003677|DNA binding;GO:0003682|chromatin binding;GO:0008134|transcription factor binding;GO:0046982|protein heterodimerization activity	ko:K02223	CLOCK, KAT13D	path:ko04710;path:ko04711;path:ko04728;path:ko05168	m.1598|TRINITY_DN101_c0_g1:336-2051(+)	complete	PF14598.3|PAS_11|PAS domain|TRINITY_DN101_c0_g1_i73|m.1598:243-346;PF08447.9|PAS_3|PAS fold|TRINITY_DN101_c0_g1_i73|m.1598:256-342;PF00989.22|PAS|PAS fold|TRINITY_DN101_c0_g1_i73|m.1598:90-147;PF00010.23|HLH|Helix-loop-helix DNA-binding domain|TRINITY_DN101_c0_g1_i73|m.1598:12-59
TRINITY_DN101_c0_g2	1.49857	0	2.72866	1.10185	0	0	429	_	_	_	_	_	_	_	_	_	_	_	_	_	_	_	_	_	_	_	_	_
TRINITY_DN101_c0_g3	5.97598	4.72178	4.68173	3.11448	12.9181	4.20891	6075	XP_026747485.1	XP_026747485.1 tyrosine-protein phosphatase 10D [Trichoplusia ni]	87.3	sp|P35992|PTP10_DROME	sp|P35992|PTP10_DROME Tyrosine-protein phosphatase 10D OS=Drosophila melanogaster OX=7227 GN=Ptp10D PE=1 SV=4	65.4	_	_	_	_	_	_	GO:0006470|protein dephosphorylation;GO:0007411|axon guidance;GO:0007417|central nervous system development;GO:0007424|open tracheal system development;GO:0007616|long-term memory;GO:0008045|motor neuron axon guidance;GO:0030948|negative regulation of vascular endothelial growth factor receptor signaling pathway;GO:0040037|negative regulation of fibroblast growth factor receptor signaling pathway…	GO:0016021|integral component of membrane;GO:0030424|axon;GO:0045177|apical part of cell	GO:0004725|protein tyrosine phosphatase activity;GO:0005001|transmembrane receptor protein tyrosine phosphatase activity	ko:K05694	PTPRB, PTPB	path:ko04520	m.1604|TRINITY_DN101_c0_g3:148-4926(+)	complete	PF00041.18|fn3|Fibronectin type III domain|TRINITY_DN101_c0_g3_i2|m.1604:145-216;PF00041.18|fn3|Fibronectin type III domain|TRINITY_DN101_c0_g3_i2|m.1604:241-319;PF00041.18|fn3|Fibronectin type III domain|TRINITY_DN101_c0_g3_i2|m.1604:344-415;PF00041.18|fn3|Fibronectin type III domain|TRINITY_DN101_c0_g3_i2|m.1604:431-505;PF00041.18|fn3|Fibronectin type III domain|TRINITY_DN101_c0_g3_i2|m.1604:53…
TRINITY_DN101_c1_g1	2.91388	4.15449	4.15437	0.273274	9.24263	1.82987	315	_	_	_	_	_	_	_	_	_	_	_	_	_	_	_	_	_	_	_	_	_
TRINITY_DN101_c2_g1	8.53714	7.68893	5.64848	1.74116	0	0.858672	348	_	_	_	_	_	_	_	_	_	_	_	_	_	_	_	_	_	_	_	_	_
TRINITY_DN101_c2_g2	0	0	0	0	0	0	201	_	_	_	_	_	_	_	_	_	_	_	_	_	_	_	_	_	_	_	_	_
TRINITY_DN10200_c0_g1	0.40227	1.6833	0	0.510565	1.3206	1.33381	328	_	_	_	_	_	_	_	_	_	_	_	_	_	_	_	_	_	_	_	_	_
TRINITY_DN10201_c0_g1	0	0	0	0.104682	0	0	1343	XP_022830063.1	XP_022830063.1 uncharacterized protein LOC111358904 [Spodoptera litura]	94.4	_	_	_	_	_	_	_	_	_	_	_	_	_	_	_	m.447|TRINITY_DN10201_c0_g1:595-1110(+);m.448|TRINITY_DN10201_c0_g1:84-494(+)	complete;complete	_
TRINITY_DN10202_c0_g1	0	6.00698	8.95522	0	4.06	2.03631	263	_	_	_	_	_	_	_	_	_	_	_	_	_	_	_	_	_	_	_	_	_
TRINITY_DN10203_c0_g1	2.15469	1.72336	0.488907	1.13536	4.24502	0.171747	2455	KDR14097.1	KDR14097.1 hypothetical protein L798_11833 [Zootermopsis nevadensis]	85.9	_	_	_	_	_	_	_	_	_	_	_	_	_	_	_	_	_	_
TRINITY_DN10203_c0_g2	2.3342	1.98988	0.999059	0.300273	1.19857	0.299973	1431	KDR14097.1	KDR14097.1 hypothetical protein L798_11833 [Zootermopsis nevadensis]	73.2	_	_	_	_	_	_	_	_	_	_	_	_	_	_	_	_	_	_
TRINITY_DN10204_c0_g1	2.52049	2.0756	0	1.58141	2.57592	1.17385	226	_	_	_	_	_	_	_	_	_	_	_	_	_	_	_	_	_	_	_	_	_
TRINITY_DN10205_c0_g1	0	0.464829	0	1.14139	0	0	723	PCG76782.1	PCG76782.1 hypothetical protein B5V51_8692 [Heliothis virescens]	92.5	_	_	_	_	_	_	_	_	_	_	_	_	_	_	_	m.526|TRINITY_DN10205_c0_g1:127-537(+)	complete	PF16037.2|DUF4790|Domain of unknown function (DUF4790)|TRINITY_DN10205_c0_g1_i3|m.526:39-128
TRINITY_DN10206_c0_g1	40.6175	0	0	64.0142	0	16.7209	270	PZC77176.1	PZC77176.1 hypothetical protein B5X24_HaOG203654 [Helicoverpa armigera]	100	sp|Q9VVT2|INDY1_DROME	sp|Q9VVT2|INDY1_DROME Protein I'm not dead yet OS=Drosophila melanogaster OX=7227 GN=Indy PE=2 SV=2	82	_	_	_	_	_	_	GO:0006848|pyruvate transport;GO:0008340|determination of adult lifespan;GO:0010889|regulation of sequestering of triglyceride;GO:0015744|succinate transport;GO:0015746|citrate transport;GO:0098656|anion transmembrane transport	GO:0005886|plasma membrane;GO:0005887|integral component of plasma membrane;GO:0016021|integral component of membrane;GO:0016323|basolateral plasma membrane	GO:0015137|citrate transmembrane transporter activity;GO:0015141|succinate transmembrane transporter activity;GO:0050833|pyruvate transmembrane transporter activity	ko:K14445	SLC13A2_3_5		_	_	_
TRINITY_DN10208_c0_g1	0.954566	0.786283	0.315632	0	0.779354	0.268894	356	_	_	_	_	_	_	_	_	_	_	_	_	_	_	_	_	_	_	_	_	_
TRINITY_DN10208_c0_g2	1.674	6.57501	1.15152	3.65272	4.98923	7.20901	350	_	_	_	_	_	_	_	_	_	_	_	_	_	_	_	_	_	_	_	_	_
TRINITY_DN10208_c0_g3	172.013	167.107	174.909	137.886	131.443	113.4	1190	_	_	_	_	_	_	_	_	_	_	_	_	_	_	_	_	_	_	m.528|TRINITY_DN10208_c0_g3:647-1081(+)	complete	_
TRINITY_DN10208_c0_g4	0.190259	0.772618	0	2.7531	0.163889	0.422389	569	_	_	_	_	_	_	_	_	_	_	_	_	_	_	_	_	_	_	_	_	_
TRINITY_DN10208_c1_g1	1.20381	0	0	0.817973	0	0	269	_	_	_	_	_	_	_	_	_	_	_	_	_	_	_	_	_	_	_	_	_
TRINITY_DN10209_c0_g1	0	1.64105	0	0	1.55052	0	881	_	_	_	_	_	_	_	_	_	_	_	_	_	_	_	_	_	_	_	_	_
TRINITY_DN1020_c0_g1	0.411495	0.397549	0.39137	0	0.162406	0.137562	455	_	_	_	_	_	_	_	_	_	_	_	_	_	_	_	_	_	_	_	_	_
TRINITY_DN1020_c0_g2	4.06999	4.2411	7.17553	7.70807	4.99555	7.91108	394	_	_	_	_	_	_	_	_	_	_	_	_	_	_	_	_	_	_	_	_	_
TRINITY_DN1020_c0_g3	10.0341	13.0732	7.55712	9.60091	7.13329	8.97447	836	_	_	_	_	_	_	_	_	_	_	_	_	_	_	_	_	_	_	_	_	_
TRINITY_DN1020_c16_g1	4.88379	4.77974	2.67637	3.91612	3.82371	2.57204	706	_	_	_	_	_	_	_	_	_	_	_	_	_	_	_	_	_	_	_	_	_
TRINITY_DN1020_c17_g1	27.1948	9.17116	43.8926	0	25.7249	0	228	ADI61817.1	ADI61817.1 endonuclease-reverse transcriptase [Bombyx mori]	83.3	_	_	_	_	_	_	_	_	_	_	_	_	_	_	_	_	_	_
TRINITY_DN1020_c18_g1	15.5147	2.50727	4.57795	4.96008	1.30557	0	208	KPJ20726.1	KPJ20726.1 hypothetical protein RR46_00012 [Papilio xuthus]	54	_	_	_	_	_	_	_	_	_	_	_	_	_	_	_	_	_	_
TRINITY_DN1020_c19_g1	0	1.26655	0	1.5102	0	0.924568	213	XP_026488880.1	XP_026488880.1 uncharacterized protein LOC113395508 [Vanessa tameamea]	67.2	_	_	_	_	_	_	_	_	_	_	_	_	_	_	_	_	_	_
TRINITY_DN1020_c1_g1	2.11822	1.00124	1.65011	2.94705	3.41458	0.47083	3240	_	_	_	_	_	_	_	_	_	_	_	_	_	_	_	_	_	_	_	_	_
TRINITY_DN1020_c1_g2	5.38274	5.17531	2.12147	1.89018	4.50632	5.79586	300	_	_	_	_	_	_	_	_	_	_	_	_	_	_	_	_	_	_	_	_	_
TRINITY_DN1020_c1_g3	2.63593	5.27534	2.55628	3.38524	3.42463	1.9982	428	_	_	_	_	_	_	_	_	_	_	_	_	_	_	_	_	_	_	_	_	_
TRINITY_DN1020_c20_g1	0	0	0	2.88257	0	0.132294	498	_	_	_	_	_	_	_	_	_	_	_	_	_	_	_	_	_	_	_	_	_
TRINITY_DN1020_c21_g1	0.436907	0.140936	0.114923	0	1.04796	0.345246	522	_	_	_	_	_	_	_	_	_	_	_	_	_	_	_	_	_	_	_	_	_
TRINITY_DN1020_c2_g1	4.56902	0	0	0	1.57193	0.52859	731	KAF9415531.1	KAF9415531.1 hypothetical protein HW555_006850 [Spodoptera exigua]	46.1	_	_	_	_	_	_	_	_	_	_	_	_	_	_	_	m.3230|TRINITY_DN1020_c2_g1:363-707(+)	complete	_
TRINITY_DN1020_c4_g1	4.14218	4.2898	3.47024	3.66013	6.43772	2.16038	2069	_	_	_	_	_	_	_	_	_	_	_	_	_	_	_	_	_	_	_	_	_
TRINITY_DN1020_c5_g1	10.3918	12.9612	8.63992	5.35724	10.4589	7.28166	1407	XP_011557892.1	XP_011557892.1 longitudinals lacking protein-like [Plutella xylostella]	100	sp|Q7KRI2|LOLAL_DROME	sp|Q7KRI2|LOLAL_DROME Longitudinals lacking protein-like OS=Drosophila melanogaster OX=7227 GN=lolal PE=1 SV=1	94.5	_	_	_	_	_	_	GO:0001700|embryonic development via the syncytial blastoderm;GO:0006342|chromatin silencing;GO:0006357|regulation of transcription by RNA polymerase II;GO:0007426|tracheal outgrowth, open tracheal system;GO:0007435|salivary gland morphogenesis;GO:0009953|dorsal/ventral pattern formation;GO:0016458|gene silencing;GO:0035167|larval lymph gland hemopoiesis;GO:0045892|negative regulation of transcri…	GO:0000794|condensed nuclear chromosome;GO:0005634|nucleus;GO:0005700|polytene chromosome;GO:0031519|PcG protein complex	GO:0003677|DNA binding;GO:0031208|POZ domain binding;GO:0042803|protein homodimerization activity	_	_	_	m.3231|TRINITY_DN1020_c5_g1:205-591(+)	complete	PF00651.28|BTB|BTB/POZ domain|TRINITY_DN1020_c5_g1_i1|m.3231:21-115
TRINITY_DN1020_c6_g1	8.67007	8.13485	4.97674	9.3621	6.12661	7.01732	315	_	_	_	_	_	_	_	_	_	_	_	_	_	_	_	_	_	_	_	_	_
TRINITY_DN1020_c7_g1	3.19065	2.42176	0	3.11358	8.1913	3.51187	201	_	_	_	_	_	_	_	_	_	_	_	_	_	_	_	_	_	_	_	_	_
TRINITY_DN1020_c8_g1	2.33981	0	2.60433	0	1.88486	1.71274	231	_	_	_	_	_	_	_	_	_	_	_	_	_	_	_	_	_	_	_	_	_
TRINITY_DN10210_c0_g1	1.87471	1.81461	0.936259	0	0	1.50497	456	_	_	_	_	_	_	_	_	_	_	_	_	_	_	_	_	_	_	_	_	_
TRINITY_DN10211_c0_g1	0	2.28126	2.01344	2.21423	0	4.3386	428	PCG74436.1	PCG74436.1 hypothetical protein B5V51_13304 [Heliothis virescens]	67.8	_	_	_	_	_	_	_	_	_	_	_	_	_	_	_	m.573|TRINITY_DN10211_c0_g1:3-428(+)	internal	_
TRINITY_DN10213_c0_g1	0	5.78275	0	0.923376	0	0	240	_	_	_	_	_	_	_	_	_	_	_	_	_	_	_	_	_	_	_	_	_
TRINITY_DN10214_c0_g1	0	0	18.1107	0	6.16164	0	347	_	_	_	_	_	_	_	_	_	_	_	_	_	_	_	_	_	_	_	_	_
TRINITY_DN10215_c0_g1	0	0	0	13.2729	0	6.42121	363	_	_	_	_	_	_	_	_	_	_	_	_	_	_	_	_	_	_	_	_	_
TRINITY_DN10215_c1_g1	0	0.992944	0	0	0.474772	0.447329	282	PCG65177.1	PCG65177.1 hypothetical protein B5V51_9559 [Heliothis virescens]	70.4	_	_	_	_	_	_	_	_	_	_	_	_	_	_	_	_	_	_
TRINITY_DN10216_c0_g1	60.3761	62.118	60.9769	36.8038	30.5424	45.1776	910	_	_	_	_	_	_	_	_	_	_	_	_	_	_	_	_	_	_	_	_	_
TRINITY_DN10216_c1_g1	0.454443	0.239243	0.417283	0	0	0	1257	_	_	_	_	_	_	_	_	_	_	_	_	_	_	_	_	_	_	_	_	_
TRINITY_DN10216_c2_g1	0.642217	0.630078	0.542223	1.31718	1.55967	0.568447	537	_	_	_	_	_	_	_	_	_	_	_	_	_	_	_	_	_	_	_	_	_
TRINITY_DN10216_c4_g1	0	0	0	3.14248	0	0	259	_	_	_	_	_	_	_	_	_	_	_	_	_	_	_	_	_	_	_	_	_
TRINITY_DN10217_c0_g1	0	0	0	0	4.18511	3.54468	376	_	_	_	_	_	_	_	_	_	_	_	_	_	_	_	_	_	_	_	_	_
TRINITY_DN10218_c0_g1	0	0	18.93	9.479	25.6873	0	301	_	_	_	_	_	_	_	_	_	_	_	_	_	_	_	_	_	_	_	_	_
TRINITY_DN10219_c0_g1	0.486716	0.677171	0.488147	0.963387	1.23881	0.432915	448	_	_	_	_	_	_	_	_	_	_	_	_	_	_	_	_	_	_	_	_	_
TRINITY_DN1021_c0_g1	7.97704	9.71708	17.4811	11.1734	5.59467	5.32805	956	_	_	_	_	_	_	_	_	_	_	_	_	_	_	_	_	_	_	_	_	_
TRINITY_DN1021_c0_g2	7.45969	0	0	25.7005	23.7537	0	1510	_	_	_	_	_	_	_	_	_	_	_	_	_	_	_	_	_	_	_	_	_
TRINITY_DN1021_c0_g3	9.28974	7.38845	5.09609	4.31591	8.11613	0	204	_	_	_	_	_	_	_	_	_	_	_	_	_	_	_	_	_	_	_	_	_
TRINITY_DN1021_c0_g4	6.53418	9.94989	8.64475	10.8913	9.70629	10.4215	569	_	_	_	_	_	_	_	_	_	_	_	_	_	_	_	_	_	_	_	_	_
TRINITY_DN1021_c10_g1	0	0	1.01922	0	0	0	204	_	_	_	_	_	_	_	_	_	_	_	_	_	_	_	_	_	_	_	_	_
TRINITY_DN1021_c1_g1	0	0	0	0	0	0	3291	_	_	_	_	_	_	_	_	_	_	_	_	_	_	_	_	_	_	_	_	_
TRINITY_DN1021_c2_g1	2.53768	2.59796	1.32614	2.04602	2.98878	2.02575	5184	_	_	_	_	_	_	_	_	_	_	_	_	_	_	_	_	_	_	_	_	_
TRINITY_DN1021_c3_g1	3.21626	3.29273	1.11811	3.38878	10.379	0.757238	310	_	_	_	_	_	_	_	_	_	_	_	_	_	_	_	_	_	_	_	_	_
TRINITY_DN1021_c4_g1	12.9653	9.82085	11.9135	15.1339	8.68102	13.0596	429	XP_021187158.1	XP_021187158.1 uncharacterized protein LOC110373977 [Helicoverpa armigera]	80	_	_	_	_	_	_	_	_	_	_	_	_	_	_	_	_	_	_
TRINITY_DN1021_c5_g1	3.03424	1.90334	1.07457	0	2.67654	1.58332	764	_	_	_	_	_	_	_	_	_	_	_	_	_	_	_	_	_	_	_	_	_
TRINITY_DN1021_c5_g2	0	0	1.07457	3.06744	0	0	764	_	_	_	_	_	_	_	_	_	_	_	_	_	_	_	_	_	_	_	_	_
TRINITY_DN1021_c6_g1	1.20725	1.1234	0.104139	0.701842	0.914603	0.181845	548	_	_	_	_	_	_	_	_	_	_	_	_	_	_	_	_	_	_	_	_	_
TRINITY_DN1021_c7_g1	1.69989	1.99647	0.685761	0.991527	1.07754	0.519917	2414	_	_	_	_	_	_	_	_	_	_	_	_	_	_	_	_	_	_	_	_	_
TRINITY_DN1021_c8_g1	0	1.01618	0	4.54807	0	3.37866	436	_	_	_	_	_	_	_	_	_	_	_	_	_	_	_	_	_	_	_	_	_
TRINITY_DN10220_c0_g1	0.459133	4.53921	5.4326	0	9.42081	5.77069	317	_	_	_	_	_	_	_	_	_	_	_	_	_	_	_	_	_	_	_	_	_
TRINITY_DN10221_c0_g1	1.34285	1.24931	3.25746	0	0	2.42795	433	_	_	_	_	_	_	_	_	_	_	_	_	_	_	_	_	_	_	_	_	_
TRINITY_DN10222_c0_g1	0	6.8934	6.89477	4.13689	0	0	300	_	_	_	_	_	_	_	_	_	_	_	_	_	_	_	_	_	_	_	_	_
TRINITY_DN10222_c1_g1	0	0	0	0	0	0	204	_	_	_	_	_	_	_	_	_	_	_	_	_	_	_	_	_	_	_	_	_
TRINITY_DN10223_c0_g1	0.486415	0.430473	0.208442	0.141561	0.535008	0.197292	3833	XP_035453023.1	XP_035453023.1 kinesin-like protein Klp61F isoform X2 [Spodoptera frugiperda]	85.6	sp|P46874|KLP2_BOMMO	sp|P46874|KLP2_BOMMO Kinesin-like protein KLP2 (Fragment) OS=Bombyx mori OX=7091 PE=2 SV=1	96.2	_	_	_	_	_	_	GO:0007018|microtubule-based movement;GO:0007049|cell cycle;GO:0051301|cell division	GO:0005737|cytoplasm;GO:0005874|microtubule	GO:0003777|microtubule motor activity;GO:0005524|ATP binding;GO:0008017|microtubule binding	ko:K10398	KIF11, EG5		m.578|TRINITY_DN10223_c0_g1:82-3510(+)	complete	PF00225.20|Kinesin|Kinesin motor domain|TRINITY_DN10223_c0_g1_i8|m.578:19-353;PF16796.2|Microtub_bd|Microtubule binding|TRINITY_DN10223_c0_g1_i8|m.578:11-163;PF13931.3|Microtub_bind|Kinesin-associated microtubule-binding|TRINITY_DN10223_c0_g1_i8|m.578:1001-1125
TRINITY_DN10223_c1_g1	0	0	0	0.636878	0.742001	0	202	PCG78945.1	PCG78945.1 hypothetical protein B5V51_2529 [Heliothis virescens]	83.8	_	_	_	_	_	_	_	_	_	_	_	_	_	_	_	_	_	_
TRINITY_DN10224_c0_g1	0	2.98501	0	4.18882	1.36674	1.30021	288	_	_	_	_	_	_	_	_	_	_	_	_	_	_	_	_	_	_	_	_	_
TRINITY_DN10224_c0_g2	2.43702	0	0	1.77078	0	0	211	_	_	_	_	_	_	_	_	_	_	_	_	_	_	_	_	_	_	_	_	_
TRINITY_DN10225_c0_g1	0.132263	0.245153	0.19793	0.238353	0.269021	0.324048	1727	_	_	_	_	_	_	_	_	_	_	_	_	_	_	_	_	_	_	_	_	_
TRINITY_DN10226_c0_g1	0.047944	0.144908	0.050124	0.134637	0.65988	0.043227	1421	PCG68011.1	PCG68011.1 hypothetical protein B5V51_5701 [Heliothis virescens]	95	sp|G5ECB1|ZIG4_CAEEL	sp|G5ECB1|ZIG4_CAEEL Zwei Ig domain protein zig-4 OS=Caenorhabditis elegans OX=6239 GN=zig-4 PE=2 SV=1	47.6	_	_	_	_	_	_	GO:0007155|cell adhesion;GO:0007411|axon guidance;GO:0048666|neuron development	GO:0005576|extracellular region;GO:0005886|plasma membrane	_	_	_	_	m.529|TRINITY_DN10226_c0_g1:3-905(+)	5prime_partial	PF13927.3|Ig_3|Immunoglobulin domain|TRINITY_DN10226_c0_g1_i1|m.529:94-171;PF13927.3|Ig_3|Immunoglobulin domain|TRINITY_DN10226_c0_g1_i1|m.529:206-281;PF07679.13|I-set|Immunoglobulin I-set domain|TRINITY_DN10226_c0_g1_i1|m.529:95-183;PF07679.13|I-set|Immunoglobulin I-set domain|TRINITY_DN10226_c0_g1_i1|m.529:207-289;PF08205.9|C2-set_2|CD80-like C2-set immunoglobulin domain|TRINITY_DN10226_c0_g1_i…
TRINITY_DN10226_c1_g1	0	0	0.28832	0	0	0.126502	471	_	_	_	_	_	_	_	_	_	_	_	_	_	_	_	_	_	_	_	_	_
TRINITY_DN10226_c1_g2	0	0	0.559508	0	0	0	294	_	_	_	_	_	_	_	_	_	_	_	_	_	_	_	_	_	_	_	_	_
TRINITY_DN10227_c0_g1	0.086746	0.187415	0.204237	0.684562	0.231308	0.215195	1541	_	_	_	_	_	_	_	_	_	_	_	_	_	_	_	_	_	_	_	_	_
TRINITY_DN10228_c0_g1	17.2657	22.2459	15.5024	24.618	21.3745	31.2676	3096	KNC29814.1	KNC29814.1 hypothetical protein FF38_01515 [Lucilia cuprina]	85.5	_	_	_	_	_	_	_	_	_	_	_	_	_	_	_	_	_	_
TRINITY_DN10229_c0_g1	149.895	185.959	187.134	101.524	95.6589	68.7687	1269	CAD6217201.1	CAD6217201.1 GSCOCG00004720001-RA-CDS [Cotesia congregata]	73.5	_	_	_	_	_	_	_	_	_	_	_	_	_	_	_	_	_	_
TRINITY_DN1022_c0_g1	0	0.550581	0.08917	0.150822	0.155312	0.404503	995	_	_	_	_	_	_	_	_	_	_	_	_	_	_	_	_	_	_	_	_	_
TRINITY_DN10230_c0_g1	0	0.574281	0	2.05658	1.3353	0	260	_	_	_	_	_	_	_	_	_	_	_	_	_	_	_	_	_	_	_	_	_
TRINITY_DN10231_c0_g1	0	0	6.95273	5.34164	0	0	657	_	_	_	_	_	_	_	_	_	_	_	_	_	_	_	_	_	_	_	_	_
TRINITY_DN10232_c0_g1	0	0.696965	0.504548	0.058986	0	0.219596	614	_	_	_	_	_	_	_	_	_	_	_	_	_	_	_	_	_	_	_	_	_
TRINITY_DN10233_c0_g1	2.42023	0.636271	1.27619	0.653531	0.863498	1.11787	497	_	_	_	_	_	_	_	_	_	_	_	_	_	_	_	_	_	_	_	_	_
TRINITY_DN10233_c1_g1	0.517795	0.371343	0	0.142761	0	0	593	_	_	_	_	_	_	_	_	_	_	_	_	_	_	_	_	_	_	_	_	_
TRINITY_DN10234_c0_g1	0	0.388318	0	0	9.26257	0	312	_	_	_	_	_	_	_	_	_	_	_	_	_	_	_	_	_	_	_	_	_
TRINITY_DN10234_c1_g1	0	0	0	0	0	0	247	_	_	_	_	_	_	_	_	_	_	_	_	_	_	_	_	_	_	_	_	_
TRINITY_DN10235_c0_g1	0.17798	0.333051	0.146518	0.22372	0.466846	0.063297	1058	KPJ21287.1	KPJ21287.1 hypothetical protein RR48_00627 [Papilio machaon]	75.6	_	_	_	_	_	_	_	_	_	_	_	_	_	_	_	_	_	_
TRINITY_DN10236_c0_g1	0	0	23.9931	0	0	6.2684	392	_	_	_	_	_	_	_	_	_	_	_	_	_	_	_	_	_	_	_	_	_
TRINITY_DN10237_c0_g1	0.234135	0.056189	0	0.094049	0.747986	0	696	_	_	_	_	_	_	_	_	_	_	_	_	_	_	_	_	_	_	_	_	_
TRINITY_DN10238_c0_g1	0.516943	0	0	0.372484	0.357069	0.33172	649	_	_	_	_	_	_	_	_	_	_	_	_	_	_	_	_	_	_	_	_	_
TRINITY_DN10239_c0_g1	0	3.46616	0	2.30925	0	1.25746	438	_	_	_	_	_	_	_	_	_	_	_	_	_	_	_	_	_	_	_	_	_
TRINITY_DN1023_c0_g1	1.9781	2.60428	2.70088	2.29602	2.75635	1.55761	848	_	_	_	_	_	_	_	_	_	_	_	_	_	_	_	_	_	_	_	_	_
TRINITY_DN1023_c1_g1	4.2654	0	3.13962	3.63969	3.08691	5.03112	280	_	_	_	_	_	_	_	_	_	_	_	_	_	_	_	_	_	_	_	_	_
TRINITY_DN10240_c0_g1	5.74383	0	4.41682	0	0.76338	0	591	_	_	_	_	_	_	_	_	_	_	_	_	_	_	_	_	_	_	_	_	_
TRINITY_DN10241_c0_g1	0.212505	0.090894	0.219693	1.08528	0.652359	0.713879	796	XP_014370158.1	XP_014370158.1 PREDICTED: set1/Ash2 histone methyltransferase complex subunit ASH2-like [Papilio machaon]	100	_	_	_	_	_	_	_	_	_	_	_	_	ko:K14964	ASH2		_	_	_
TRINITY_DN10243_c0_g1	0	0.778473	0.475914	0	0.527612	0	1715	_	_	_	_	_	_	_	_	_	_	_	_	_	_	_	_	_	_	_	_	_
TRINITY_DN10244_c0_g1	0	0.267841	0	0.349579	1.30081	0.254284	470	KAF9421990.1	KAF9421990.1 hypothetical protein HW555_002210 [Spodoptera exigua]	48.6	_	_	_	_	_	_	_	_	_	_	_	_	_	_	_	_	_	_
TRINITY_DN10244_c1_g1	0.126991	0.107573	0.013727	0.045375	0.644739	0.058987	8666	_	_	_	_	_	_	_	_	_	_	_	_	_	_	_	_	_	_	_	_	_
TRINITY_DN10245_c0_g1	0	0	0	0.230867	0	0	4311	_	_	_	_	_	_	_	_	_	_	_	_	_	_	_	_	_	_	_	_	_
TRINITY_DN10245_c1_g1	0.971029	0.545532	0.743732	0.059726	0.857839	0.340618	930	_	_	_	_	_	_	_	_	_	_	_	_	_	_	_	_	_	_	_	_	_
TRINITY_DN10245_c2_g1	0.467027	0.34414	0.137976	0.100695	0	0.363007	480	_	_	_	_	_	_	_	_	_	_	_	_	_	_	_	_	_	_	_	_	_
TRINITY_DN10246_c0_g1	11.1673	10.7457	9.66259	7.13695	8.04029	5.29197	5862	TGZ55920.1	TGZ55920.1 hypothetical protein DBV15_06073 [Temnothorax longispinosus]	41.7	_	_	_	_	_	_	_	_	_	_	_	_	_	_	_	_	_	_
TRINITY_DN10247_c0_g1	0.14791	0.030708	0.042737	0.273974	0.358013	0.046965	3984	XP_021194830.1	XP_021194830.1 transient receptor potential channel pyrexia-like [Helicoverpa armigera]	82.6	_	_	_	_	_	_	_	_	_	_	_	_	_	_	_	m.584|TRINITY_DN10247_c0_g1:595-3840(+)	complete	PF12796.4|Ank_2|Ankyrin repeats (3 copies)|TRINITY_DN10247_c0_g1_i10|m.584:45-109;PF12796.4|Ank_2|Ankyrin repeats (3 copies)|TRINITY_DN10247_c0_g1_i10|m.584:236-315;PF12796.4|Ank_2|Ankyrin repeats (3 copies)|TRINITY_DN10247_c0_g1_i10|m.584:264-363;PF12796.4|Ank_2|Ankyrin repeats (3 copies)|TRINITY_DN10247_c0_g1_i10|m.584:350-430;PF12796.4|Ank_2|Ankyrin repeats (3 copies)|TRINITY_DN10247_c0_g1_i10…
TRINITY_DN10247_c1_g1	0	1.51853	0	0	0	0	210	ABO45233.1	ABO45233.1 reverse transcriptase [Ostrinia nubilalis]	85.1	_	_	_	_	_	_	_	_	_	_	_	_	_	_	_	_	_	_
TRINITY_DN10248_c0_g1	0.392638	0.310711	0.327279	0.294852	0.236338	0.155019	2032	_	_	_	_	_	_	_	_	_	_	_	_	_	_	_	_	_	_	_	_	_
TRINITY_DN10249_c0_g1	4.55161	0	6.41757	0.503285	2.99009	2.75844	233	_	_	_	_	_	_	_	_	_	_	_	_	_	_	_	_	_	_	_	_	_
TRINITY_DN1024_c0_g1	1.57019	0	1.88698	1.06732	0	0	1279	_	_	_	_	_	_	_	_	_	_	_	_	_	_	_	_	_	_	m.321|TRINITY_DN1024_c0_g1:674-1102(+)	complete	_
TRINITY_DN1024_c1_g1	0	3.96926	0	0	3.75057	2.1849	232	XP_035445241.1	XP_035445241.1 uncharacterized protein LOC118272704 [Spodoptera frugiperda]	82.9	_	_	_	_	_	_	_	_	_	_	_	_	_	_	_	_	_	_
TRINITY_DN1024_c2_g1	0	0	5.65982	0	8.04924	0	694	_	_	_	_	_	_	_	_	_	_	_	_	_	_	_	_	_	_	_	_	_
TRINITY_DN10250_c0_g1	2.06474	2.95494	2.57571	2.28098	2.36119	1.05611	1971	KAF9422017.1	KAF9422017.1 hypothetical protein HW555_002237 [Spodoptera exigua]	95.9	sp|Q8SZ16|SDHF3_DROME	sp|Q8SZ16|SDHF3_DROME Succinate dehydrogenase assembly factor 3, mitochondrial OS=Drosophila melanogaster OX=7227 GN=Sdhaf3 PE=2 SV=1	72	_	_	_	_	_	_	GO:0006105|succinate metabolic process;GO:0006979|response to oxidative stress;GO:0034553|mitochondrial respiratory chain complex II assembly;GO:0050881|musculoskeletal movement;GO:0055093|response to hyperoxia	GO:0005758|mitochondrial intermembrane space;GO:0005759|mitochondrial matrix	_	_	_	_	m.556|TRINITY_DN10250_c0_g1:600-968(+)	complete	PF13233.3|Complex1_LYR_2|Complex1_LYR-like|TRINITY_DN10250_c0_g1_i1|m.556:10-78;PF05347.12|Complex1_LYR|Complex 1 protein (LYR family)|TRINITY_DN10250_c0_g1_i1|m.556:9-60
TRINITY_DN10251_c0_g1	0	0.231652	0	0.203512	0	0	478	XP_023953717.1	XP_023953717.1 cullin-4A-like [Bicyclus anynana]	97.1	_	_	_	_	_	_	_	_	_	_	_	_	ko:K10609	CUL4	path:ko03420;path:ko04120	_	_	_
TRINITY_DN10252_c0_g1	0.442576	0.749819	0.457294	3.43062	0	1.09044	316	_	_	_	_	_	_	_	_	_	_	_	_	_	_	_	_	_	_	_	_	_
TRINITY_DN10252_c0_g2	0	0	1.50538	0	0	0	255	_	_	_	_	_	_	_	_	_	_	_	_	_	_	_	_	_	_	_	_	_
TRINITY_DN10253_c0_g1	0	0.073352	0	0.124537	2.25405	0.154141	597	_	_	_	_	_	_	_	_	_	_	_	_	_	_	_	_	_	_	_	_	_
TRINITY_DN10254_c0_g1	0	0	5.56	0	0	7.89895	365	_	_	_	_	_	_	_	_	_	_	_	_	_	_	_	_	_	_	_	_	_
TRINITY_DN10254_c0_g2	0	0	2.14246	0	0	11.5498	242	XP_026728860.1	XP_026728860.1 uncharacterized protein LOC113494625 isoform X3 [Trichoplusia ni]	90.5	_	_	_	_	_	_	_	_	_	_	_	_	_	_	_	_	_	_
TRINITY_DN10255_c0_g1	0.357189	0.146921	0	0	0.297024	0	434	_	_	_	_	_	_	_	_	_	_	_	_	_	_	_	_	_	_	_	_	_
TRINITY_DN10255_c0_g2	0.761104	0.843601	0.496143	0.719682	1.05098	0.230238	1003	KAF9822784.1	KAF9822784.1 hypothetical protein SFRURICE_019474 [Spodoptera frugiperda]	73.1	_	_	_	_	_	_	_	_	_	_	_	_	_	_	_	_	_	_
TRINITY_DN10255_c1_g1	0	1.70873	0	0.778019	0	0	690	_	_	_	_	_	_	_	_	_	_	_	_	_	_	_	_	_	_	_	_	_
TRINITY_DN10255_c2_g1	0	2.82818	0	0	1.31676	0	222	_	_	_	_	_	_	_	_	_	_	_	_	_	_	_	_	_	_	_	_	_
TRINITY_DN10256_c0_g1	0	0.987729	0	2.28427	0	1.12942	658	_	_	_	_	_	_	_	_	_	_	_	_	_	_	_	_	_	_	_	_	_
TRINITY_DN10257_c0_g1	0.290444	0.23835	0.286631	0.429307	0.237229	0.246928	367	_	_	_	_	_	_	_	_	_	_	_	_	_	_	_	_	_	_	_	_	_
TRINITY_DN10257_c0_g2	0.278023	0.796788	0.975135	0.814047	4.37758	0.855282	478	_	_	_	_	_	_	_	_	_	_	_	_	_	_	_	_	_	_	_	_	_
TRINITY_DN10257_c1_g1	1.01103	1.92603	0.75478	1.09528	2.60628	0.627292	552	_	_	_	_	_	_	_	_	_	_	_	_	_	_	_	_	_	_	_	_	_
TRINITY_DN10257_c1_g2	0	0	0.451479	0	0	0	397	_	_	_	_	_	_	_	_	_	_	_	_	_	_	_	_	_	_	_	_	_
TRINITY_DN10257_c3_g1	1.53816	0	0	1.10169	0	0.608978	220	_	_	_	_	_	_	_	_	_	_	_	_	_	_	_	_	_	_	_	_	_
TRINITY_DN10257_c4_g1	0.381943	0.157319	0	0	0.158741	0.165987	423	_	_	_	_	_	_	_	_	_	_	_	_	_	_	_	_	_	_	_	_	_
TRINITY_DN10258_c0_g1	0.21633	1.23128	0.456953	0.198861	0.631888	0.288707	965	_	_	_	_	_	_	_	_	_	_	_	_	_	_	_	_	_	_	_	_	_
TRINITY_DN10259_c0_g1	0	0	0	0	0	0	495	_	_	_	_	_	_	_	_	_	_	_	_	_	_	_	_	_	_	_	_	_
TRINITY_DN1025_c0_g1	1.0746	1.33485	1.97581	1.50394	1.06669	0.755025	2712	_	_	_	_	_	_	_	_	_	_	_	_	_	_	_	_	_	_	_	_	_
TRINITY_DN1025_c0_g2	3.69595	3.63587	3.20109	3.49482	4.21938	2.23299	1076	_	_	_	_	_	_	_	_	_	_	_	_	_	_	_	_	_	_	_	_	_
TRINITY_DN1025_c10_g1	0	0	0	0.622963	1.28437	0	352	_	_	_	_	_	_	_	_	_	_	_	_	_	_	_	_	_	_	_	_	_
TRINITY_DN1025_c11_g1	0	0	0	6.54881	1.20698	0	220	_	_	_	_	_	_	_	_	_	_	_	_	_	_	_	_	_	_	_	_	_
TRINITY_DN1025_c12_g1	0	0	0.544901	2.02347	0	0.636933	297	_	_	_	_	_	_	_	_	_	_	_	_	_	_	_	_	_	_	_	_	_
TRINITY_DN1025_c13_g1	1.49701	0.912808	2.79603	1.69301	3.64977	2.12342	565	RVE40503.1	RVE40503.1 hypothetical protein evm_014848 [Chilo suppressalis]	82.9	_	_	_	_	_	_	_	_	_	_	_	_	_	_	_	_	_	_
TRINITY_DN1025_c14_g1	0	0	6.55118	5.31742	6.48214	1.96083	266	_	_	_	_	_	_	_	_	_	_	_	_	_	_	_	_	_	_	_	_	_
TRINITY_DN1025_c1_g1	0.718103	0.90215	0.348562	0.497431	1.55994	0.601962	2751	_	_	_	_	_	_	_	_	_	_	_	_	_	_	_	_	_	_	_	_	_
TRINITY_DN1025_c1_g2	0.655811	0.76736	1.04857	0.681356	1.05802	0.684982	1143	PZC73135.1	PZC73135.1 hypothetical protein B5X24_HaOG209993 [Helicoverpa armigera]	81.8	_	_	_	_	_	_	_	_	_	_	_	_	_	_	_	_	_	_
TRINITY_DN1025_c2_g1	2.75921	4.17657	4.52281	2.93332	4.83561	0.65689	369	_	_	_	_	_	_	_	_	_	_	_	_	_	_	_	_	_	_	_	_	_
TRINITY_DN1025_c2_g2	0	0	0	0	0	0	203	_	_	_	_	_	_	_	_	_	_	_	_	_	_	_	_	_	_	_	_	_
TRINITY_DN1025_c3_g1	0.93836	1.22153	1.51136	0	0	0	3865	_	_	_	_	_	_	_	_	_	_	_	_	_	_	_	_	_	_	_	_	_
TRINITY_DN1025_c4_g1	3.76929	3.22594	3.97801	2.98679	4.87623	2.20223	2081	_	_	_	_	_	_	_	_	_	_	_	_	_	_	_	_	_	_	_	_	_
TRINITY_DN1025_c5_g1	0	0	0	0.691146	0.960546	0.312403	5905	_	_	_	_	_	_	_	_	_	_	_	_	_	_	_	_	_	_	m.786|TRINITY_DN1025_c5_g1:4004-4906(+)	complete	_
TRINITY_DN1025_c5_g2	0.978004	1.51357	1.81949	0.597858	0.1182	0.245565	477	_	_	_	_	_	_	_	_	_	_	_	_	_	_	_	_	_	_	_	_	_
TRINITY_DN1025_c6_g1	0	0	0.409482	0.559391	0	0	440	_	_	_	_	_	_	_	_	_	_	_	_	_	_	_	_	_	_	_	_	_
TRINITY_DN1025_c7_g1	5.2702	4.61906	1.71646	0	3.27573	1.33134	233	_	_	_	_	_	_	_	_	_	_	_	_	_	_	_	_	_	_	_	_	_
TRINITY_DN1025_c9_g1	6.79582	9.26974	3.87099	4.87591	4.73315	2.29519	277	_	_	_	_	_	_	_	_	_	_	_	_	_	_	_	_	_	_	_	_	_
TRINITY_DN10260_c0_g1	0	1.24382	0	1.28384	0	1.18338	1465	_	_	_	_	_	_	_	_	_	_	_	_	_	_	_	_	_	_	_	_	_
TRINITY_DN10261_c0_g1	0.106526	0	0	0.097644	1.31794	0	1051	_	_	_	_	_	_	_	_	_	_	_	_	_	_	_	_	_	_	_	_	_
TRINITY_DN10262_c0_g1	0	0	2.898	3.07736	0	0	404	_	_	_	_	_	_	_	_	_	_	_	_	_	_	_	_	_	_	_	_	_
TRINITY_DN10262_c1_g1	0.070375	0.359211	0.216844	0.058472	0	0	670	_	_	_	_	_	_	_	_	_	_	_	_	_	_	_	_	_	_	_	_	_
TRINITY_DN10263_c0_g1	0	0	1.7614	0	2.97741	0.681771	422	_	_	_	_	_	_	_	_	_	_	_	_	_	_	_	_	_	_	_	_	_
TRINITY_DN10264_c0_g1	0	0	0.12046	0.153872	0	0.094402	1815	_	_	_	_	_	_	_	_	_	_	_	_	_	_	_	_	_	_	m.531|TRINITY_DN10264_c0_g1:1061-1372(+)	complete	_
TRINITY_DN10265_c0_g1	11.8	12.8485	13.4368	10.0241	10.3086	6.53862	991	_	_	_	_	_	_	_	_	_	_	_	_	_	_	_	_	_	_	_	_	_
TRINITY_DN10266_c0_g1	2.74615	0	0	3.00758	0	0	347	_	_	_	_	_	_	_	_	_	_	_	_	_	_	_	_	_	_	_	_	_
TRINITY_DN10267_c0_g1	0	0	0	0	0.930356	0	285	_	_	_	_	_	_	_	_	_	_	_	_	_	_	_	_	_	_	_	_	_
TRINITY_DN10268_c0_g1	0	3.01816	0	0	2.24458	0	1445	_	_	_	_	_	_	_	_	_	_	_	_	_	_	_	_	_	_	_	_	_
TRINITY_DN10268_c1_g1	0.355879	0	0.176451	0	0.148512	0	434	_	_	_	_	_	_	_	_	_	_	_	_	_	_	_	_	_	_	_	_	_
TRINITY_DN10269_c0_g1	3.19239	1.86698	2.0746	1.66256	0.528377	1.36553	354	_	_	_	_	_	_	_	_	_	_	_	_	_	_	_	_	_	_	_	_	_
TRINITY_DN1026_c0_g1	0.421656	0	0	0	0	0	6624	XP_021194323.1	XP_021194323.1 TBC1 domain family member 15 isoform X4 [Helicoverpa armigera]	96	_	_	_	_	_	_	_	_	_	_	_	_	ko:K20168	TBC1D15	path:ko04137	m.456|TRINITY_DN1026_c0_g1:152-2125(+)	complete	PF00566.15|RabGAP-TBC|Rab-GTPase-TBC domain|TRINITY_DN1026_c0_g1_i5|m.456:322-546;PF12068.5|DUF3548|Domain of unknown function (DUF3548)|TRINITY_DN1026_c0_g1_i5|m.456:39-205
TRINITY_DN1026_c1_g1	1.07501	0.953114	0.406131	0.198762	1.22347	0.637477	2674	_	_	_	_	_	_	_	_	_	_	_	_	_	_	_	_	_	_	_	_	_
TRINITY_DN1026_c2_g1	1.9087	7.95337	5.19476	2.93731	12.3919	0.502457	306	_	_	_	_	_	_	_	_	_	_	_	_	_	_	_	_	_	_	_	_	_
TRINITY_DN1026_c3_g1	9.48053	3.07118	5.09291	1.07408	8.88657	2.30537	276	_	_	_	_	_	_	_	_	_	_	_	_	_	_	_	_	_	_	_	_	_
TRINITY_DN1026_c4_g1	0.595473	0.244527	0	0.498524	0	0.252692	364	_	_	_	_	_	_	_	_	_	_	_	_	_	_	_	_	_	_	_	_	_
TRINITY_DN1026_c5_g1	14.8282	11.8971	9.08413	2.56894	6.75711	2.37508	1674	_	_	_	_	_	_	_	_	_	_	_	_	_	_	_	_	_	_	_	_	_
TRINITY_DN1026_c6_g1	30.3042	19.8185	0	24.1523	0.583569	27.6843	246	_	_	_	_	_	_	_	_	_	_	_	_	_	_	_	_	_	_	_	_	_
TRINITY_DN10270_c0_g1	2.45147	2.00295	1.55281	1.89635	3.826	1.95069	1329	_	_	_	_	_	_	_	_	_	_	_	_	_	_	_	_	_	_	_	_	_
TRINITY_DN10271_c0_g1	3.18038	2.56895	0.877452	2.91694	2.62203	2.06913	412	_	_	_	_	_	_	_	_	_	_	_	_	_	_	_	_	_	_	_	_	_
TRINITY_DN10271_c0_g2	2.87086	3.09124	3.14559	2.45747	3.61485	1.05503	425	_	_	_	_	_	_	_	_	_	_	_	_	_	_	_	_	_	_	_	_	_
TRINITY_DN10271_c0_g3	3.85473	4.11917	4.48705	1.31665	2.21592	1.01192	256	_	_	_	_	_	_	_	_	_	_	_	_	_	_	_	_	_	_	_	_	_
TRINITY_DN10271_c0_g4	0	0	0	0.403655	1.51827	0	272	_	_	_	_	_	_	_	_	_	_	_	_	_	_	_	_	_	_	_	_	_
TRINITY_DN10272_c0_g1	0	0	0	6.61536	11.3664	9.62063	256	_	_	_	_	_	_	_	_	_	_	_	_	_	_	_	_	_	_	_	_	_
TRINITY_DN10273_c0_g1	0	0	2.39136	0.735052	0	0	1116	PCG64733.1	PCG64733.1 hypothetical protein B5V51_10165 [Heliothis virescens]	95.3	sp|Q9VWA8|FRG1_DROME	sp|Q9VWA8|FRG1_DROME Protein FRG1 homolog OS=Drosophila melanogaster OX=7227 GN=FRG1 PE=2 SV=1	73.5	_	_	_	_	_	_	GO:0006364|rRNA processing;GO:0007517|muscle organ development;GO:0031936|negative regulation of chromatin silencing;GO:0070511|negative regulation of histone H4-K20 methylation	GO:0005730|nucleolus;GO:0005737|cytoplasm;GO:0015030|Cajal body;GO:0030018|Z disc;GO:0055120|striated muscle dense body;GO:0071013|catalytic step 2 spliceosome	GO:0051015|actin filament binding	ko:K13122	FRG1		m.601|TRINITY_DN10273_c0_g1:271-1044(+)	complete	PF06229.9|FRG1|FRG1-like domain|TRINITY_DN10273_c0_g1_i5|m.601:69-255
TRINITY_DN10273_c1_g1	0	1.1228	0.67246	0.274033	0	0	349	_	_	_	_	_	_	_	_	_	_	_	_	_	_	_	_	_	_	_	_	_
TRINITY_DN10273_c2_g1	2.86932	1.90154	0.693472	1.0497	0	0	267	_	_	_	_	_	_	_	_	_	_	_	_	_	_	_	_	_	_	_	_	_
TRINITY_DN10274_c0_g1	2.47665	0	1.99361	0.317904	0	1.11307	313	_	_	_	_	_	_	_	_	_	_	_	_	_	_	_	_	_	_	_	_	_
TRINITY_DN10275_c0_g1	0	0	39.5651	0	0	23.4279	437	_	_	_	_	_	_	_	_	_	_	_	_	_	_	_	_	_	_	_	_	_
TRINITY_DN10276_c0_g1	1.78648	0	3.36915	0	0	3.30615	271	_	_	_	_	_	_	_	_	_	_	_	_	_	_	_	_	_	_	_	_	_
TRINITY_DN10276_c0_g2	0	0	0.272912	0	0.109535	0.11475	2189	XP_022828807.1	XP_022828807.1 uncharacterized protein LOC111358121 [Spodoptera litura]	79.2	_	_	_	_	_	_	_	_	_	_	_	_	_	_	_	m.557|TRINITY_DN10276_c0_g2:123-623(+)	complete	_
TRINITY_DN10276_c0_g3	15.196	13.5414	9.93157	7.13131	13.8984	5.74127	230	_	_	_	_	_	_	_	_	_	_	_	_	_	_	_	_	_	_	_	_	_
TRINITY_DN10276_c1_g1	0.084834	0.047064	0.069487	0.122601	0.034234	0	3368	_	_	_	_	_	_	_	_	_	_	_	_	_	_	_	_	_	_	_	_	_
TRINITY_DN10277_c0_g1	5.43621	0	0	0	0	0	527	_	_	_	_	_	_	_	_	_	_	_	_	_	_	_	_	_	_	_	_	_
TRINITY_DN10277_c0_g2	0.526267	1.2731	0	2.85581	0	1.48227	307	_	_	_	_	_	_	_	_	_	_	_	_	_	_	_	_	_	_	_	_	_
TRINITY_DN10277_c0_g3	0.112946	0.316603	0.235775	0.376772	0.275317	0.076305	1249	_	_	_	_	_	_	_	_	_	_	_	_	_	_	_	_	_	_	_	_	_
TRINITY_DN10278_c0_g1	0	0	0.055882	0	0.054129	0	787	XP_035453366.1	XP_035453366.1 dystrophin-like isoform X3 [Spodoptera frugiperda]	94.6	_	_	_	_	_	_	_	_	_	_	_	_	_	_	_	_	_	_
TRINITY_DN10279_c0_g1	4.59024	1.69442	3.12442	6.28884	1.63998	2.4316	302	_	_	_	_	_	_	_	_	_	_	_	_	_	_	_	_	_	_	_	_	_
TRINITY_DN1027_c0_g1	4.24523	4.96151	8.86227	4.79884	4.73772	9.98323	3362	_	_	_	_	_	_	_	_	_	_	_	_	_	_	_	_	_	_	_	_	_
TRINITY_DN10280_c0_g1	12.7887	7.2657	7.81846	3.68652	7.15248	3.47459	703	_	_	_	_	_	_	_	_	_	_	_	_	_	_	_	_	_	_	_	_	_
TRINITY_DN10281_c0_g1	4.87589	4.58388	0	0	0	1.23998	475	KAF9409397.1	KAF9409397.1 hypothetical protein HW555_011221 [Spodoptera exigua]	99.4	sp|Q9XZ06|NU931_DROME	sp|Q9XZ06|NU931_DROME Nuclear pore complex protein Nup93-1 OS=Drosophila melanogaster OX=7227 GN=Nup93-1 PE=1 SV=1	59.7	_	_	_	_	_	_	GO:0006325|chromatin organization;GO:0006606|protein import into nucleus;GO:0006999|nuclear pore organization;GO:0016973|poly(A)+ mRNA export from nucleus;GO:0030717|oocyte karyosome formation;GO:0031937|positive regulation of chromatin silencing;GO:0036228|protein localization to nuclear inner membrane;GO:0097240|chromosome attachment to the nuclear envelope;GO:0097298|regulation of nucleus size	GO:0005643|nuclear pore;GO:0005654|nucleoplasm;GO:0031965|nuclear membrane;GO:0034399|nuclear periphery;GO:0044615|nuclear pore nuclear basket	GO:0003682|chromatin binding;GO:0017056|structural constituent of nuclear pore;GO:0031490|chromatin DNA binding	ko:K14309	NUP93, NIC96	path:ko03013	m.547|TRINITY_DN10281_c0_g1:1-474(+)	internal	PF04097.11|Nic96|Nup93/Nic96|TRINITY_DN10281_c0_g1_i1|m.547:22-156
TRINITY_DN10281_c1_g1	0	0	5.67129	5.57592	8.74149	0	236	_	_	_	_	_	_	_	_	_	_	_	_	_	_	_	_	_	_	_	_	_
TRINITY_DN10282_c0_g1	0	9.40835	0	0	4.04436	6.13547	314	_	_	_	_	_	_	_	_	_	_	_	_	_	_	_	_	_	_	_	_	_
TRINITY_DN10283_c0_g1	0	0	1.28534	0	1.67579	0	738	_	_	_	_	_	_	_	_	_	_	_	_	_	_	_	_	_	_	_	_	_
TRINITY_DN10285_c0_g1	0	0.489834	0.236389	0.352672	0.095965	0.468069	1528	_	_	_	_	_	_	_	_	_	_	_	_	_	_	_	_	_	_	_	_	_
TRINITY_DN10286_c0_g1	0	1.39443	0	2.11381	0	1.73503	1384	_	_	_	_	_	_	_	_	_	_	_	_	_	_	_	_	_	_	_	_	_
TRINITY_DN10286_c0_g2	5.16439	7.10169	6.17591	8.59525	8.41911	5.38874	1461	_	_	_	_	_	_	_	_	_	_	_	_	_	_	_	_	_	_	_	_	_
TRINITY_DN10286_c1_g1	1.83038	0	0	1.53529	1.61255	0.92885	726	_	_	_	_	_	_	_	_	_	_	_	_	_	_	_	_	_	_	_	_	_
TRINITY_DN10286_c1_g2	0	4.15621	1.78542	0	0	0.587577	226	_	_	_	_	_	_	_	_	_	_	_	_	_	_	_	_	_	_	_	_	_
TRINITY_DN10286_c3_g1	0.822842	0	0	0	0.708621	0.655308	209	_	_	_	_	_	_	_	_	_	_	_	_	_	_	_	_	_	_	_	_	_
TRINITY_DN10287_c0_g1	0	1.16659	0.614266	0	0	2.12124	392	_	_	_	_	_	_	_	_	_	_	_	_	_	_	_	_	_	_	_	_	_
TRINITY_DN10288_c0_g1	0	0	2.02571	0	2.18344	0	205	_	_	_	_	_	_	_	_	_	_	_	_	_	_	_	_	_	_	_	_	_
TRINITY_DN10288_c0_g2	0.246867	1.19366	0.124324	0.359516	1.36381	0	503	_	_	_	_	_	_	_	_	_	_	_	_	_	_	_	_	_	_	_	_	_
TRINITY_DN10289_c0_g1	42.4118	31.0173	26.94	30.0363	62.0368	18.52	424	_	_	_	_	_	_	_	_	_	_	_	_	_	_	_	_	_	_	_	_	_
TRINITY_DN10289_c2_g1	7.16939	6.58153	7.62832	2.67693	3.37851	1.53856	253	_	_	_	_	_	_	_	_	_	_	_	_	_	_	_	_	_	_	_	_	_
TRINITY_DN1028_c0_g1	30.3438	72.1879	128.479	32.3093	19.0293	12.7901	1652	_	_	_	_	_	_	_	_	_	_	_	_	_	_	_	_	_	_	_	_	_
TRINITY_DN1028_c0_g2	80.756	81.2098	115.857	56.1661	32.4227	51.0669	1652	XP_035450576.1	XP_035450576.1 D-3-phosphoglycerate dehydrogenase-like [Spodoptera frugiperda]	96	_	_	_	_	_	_	_	_	_	_	_	_	ko:K00058	serA, PHGDH	path:ko00260;path:ko00680;path:ko01100;path:ko01120;path:ko01130;path:ko01200;path:ko01230	m.610|TRINITY_DN1028_c0_g2:307-1284(+)	complete	PF02826.16|2-Hacid_dh_C|D-isomer specific 2-hydroxyacid dehydrogenase, NAD binding domain|TRINITY_DN1028_c0_g2_i1|m.610:109-285;PF00389.27|2-Hacid_dh|D-isomer specific 2-hydroxyacid dehydrogenase, catalytic domain|TRINITY_DN1028_c0_g2_i1|m.610:6-311
TRINITY_DN10290_c0_g1	0.021066	0	0	0.779012	0.122276	0.578416	2874	_	_	_	_	_	_	_	_	_	_	_	_	_	_	_	_	_	_	_	_	_
TRINITY_DN10291_c0_g1	0	17.6062	0	0	24.0905	4.15745	343	_	_	_	_	_	_	_	_	_	_	_	_	_	_	_	_	_	_	m.546|TRINITY_DN10291_c0_g1:1-342(+)	internal	_
TRINITY_DN10292_c0_g1	0.433571	0.600272	0.311258	0.258968	6.1478	0.122782	2493	_	_	_	_	_	_	_	_	_	_	_	_	_	_	_	_	_	_	_	_	_
TRINITY_DN10293_c0_g1	0.291137	0	0	0.438848	0	0.070304	2500	_	_	_	_	_	_	_	_	_	_	_	_	_	_	_	_	_	_	_	_	_
TRINITY_DN10294_c0_g1	78.4293	22.9495	20.3524	29.0633	36.443	8.53232	396	PCG65480.1	PCG65480.1 hypothetical protein B5V51_9163 [Heliothis virescens]	64.3	sp|P52905|TRYI_DROME	sp|P52905|TRYI_DROME Trypsin iota OS=Drosophila melanogaster OX=7227 GN=iotaTry PE=2 SV=1	47.7	_	_	_	_	_	_	GO:0006508|proteolysis	GO:0005615|extracellular space	GO:0004252|serine-type endopeptidase activity	_	_	_	m.587|TRINITY_DN10294_c0_g1:1-396(+)	internal	PF00089.23|Trypsin|Trypsin|TRINITY_DN10294_c0_g1_i8|m.587:3-131
TRINITY_DN10295_c0_g1	0	0	7.77241	25.4318	7.90385	0	375	_	_	_	_	_	_	_	_	_	_	_	_	_	_	_	_	_	_	_	_	_
TRINITY_DN10296_c0_g1	0	30.0909	0	20.7675	0	0	304	_	_	_	_	_	_	_	_	_	_	_	_	_	_	_	_	_	_	_	_	_
TRINITY_DN10297_c0_g1	1.47512	2.70266	0.762466	0.892311	0.563085	0.502544	253	_	_	_	_	_	_	_	_	_	_	_	_	_	_	_	_	_	_	_	_	_
TRINITY_DN10298_c0_g1	0	1.57563	0	0.819025	0	0.139072	453	_	_	_	_	_	_	_	_	_	_	_	_	_	_	_	_	_	_	_	_	_
TRINITY_DN10298_c1_g1	0	0	0	0	1.25444	0	334	_	_	_	_	_	_	_	_	_	_	_	_	_	_	_	_	_	_	_	_	_
TRINITY_DN10298_c2_g1	0	0	0	0.591201	0	0	378	_	_	_	_	_	_	_	_	_	_	_	_	_	_	_	_	_	_	_	_	_
TRINITY_DN10299_c0_g1	36.3463	47.2465	30.2861	37.7102	0	0	292	KAF9801636.1	KAF9801636.1 hypothetical protein SFRURICE_012208 [Spodoptera frugiperda]	96.8	_	_	_	_	_	_	_	_	_	_	_	_	ko:K00799	GST, gst	path:ko00480;path:ko00980;path:ko00982;path:ko01524;path:ko05204;path:ko05418	_	_	_
TRINITY_DN1029_c0_g1	2.13924	1.95475	3.54822	3.36	3.1315	3.89074	392	_	_	_	_	_	_	_	_	_	_	_	_	_	_	_	_	_	_	_	_	_
TRINITY_DN1029_c0_g2	1.57607	3.14826	1.95304	4.06878	3.30329	2.81375	3570	_	_	_	_	_	_	_	_	_	_	_	_	_	_	_	_	_	_	_	_	_
TRINITY_DN102_c0_g1	37.5893	53.5686	102.256	61.8748	50.722	74.6732	1741	_	_	_	_	_	_	_	_	_	_	_	_	_	_	_	_	_	_	_	_	_
TRINITY_DN102_c1_g1	0.972255	0	0.227889	0.564591	0	0	2234	XP_028168708.1	XP_028168708.1 cytochrome P450 4C1-like [Ostrinia furnacalis]	75.9	_	_	_	_	_	_	_	_	_	_	_	_	_	_	_	_	_	_
TRINITY_DN10300_c0_g1	1.08731	0.893052	0.840523	0.669093	0.586373	0.710859	6559	_	_	_	_	_	_	_	_	_	_	_	_	_	_	_	_	_	_	_	_	_
TRINITY_DN10301_c0_g1	0	0	0	0.427169	24.1042	0	261	_	_	_	_	_	_	_	_	_	_	_	_	_	_	_	_	_	_	_	_	_
TRINITY_DN10302_c0_g1	0	2.60771	0	4.09467	0	0.2254	379	XP_021196612.1	XP_021196612.1 caltractin-like isoform X1 [Helicoverpa armigera]	79.2	_	_	_	_	_	_	_	_	_	_	_	_	_	_	_	m.766|TRINITY_DN10302_c0_g1:82-378(+)	3prime_partial	_
TRINITY_DN10303_c0_g1	0.062117	0.244148	0.070018	0.364706	0.129663	0.106951	7794	_	_	_	_	_	_	_	_	_	_	_	_	_	_	_	_	_	_	_	_	_
TRINITY_DN10303_c1_g1	1.20931	0	0.19899	0.598535	0	0	415	_	_	_	_	_	_	_	_	_	_	_	_	_	_	_	_	_	_	_	_	_
TRINITY_DN10304_c0_g1	0	0.165272	0	0.114764	0	0.216135	2535	_	_	_	_	_	_	_	_	_	_	_	_	_	_	_	_	_	_	_	_	_
TRINITY_DN10304_c0_g2	0	0.808299	0.081195	0	0.356242	0	1022	PZC74176.1	PZC74176.1 hypothetical protein B5X24_HaOG208248 [Helicoverpa armigera]	72.2	_	_	_	_	_	_	_	_	_	_	_	_	_	_	_	_	_	_
TRINITY_DN10304_c0_g3	1.49841	0	1.79533	0.5309	0	0.591003	225	_	_	_	_	_	_	_	_	_	_	_	_	_	_	_	_	_	_	_	_	_
TRINITY_DN10304_c1_g1	0.146355	0.353724	0.435788	0	0.617948	0.256883	468	_	_	_	_	_	_	_	_	_	_	_	_	_	_	_	_	_	_	_	_	_
TRINITY_DN10305_c0_g1	0	0.5686	0.426621	0.381143	0.697301	0.509121	1151	XP_035448601.1	XP_035448601.1 uncharacterized protein LOC118274921 isoform X2 [Spodoptera frugiperda]	92.2	_	_	_	_	_	_	_	_	_	_	_	_	_	_	_	m.694|TRINITY_DN10305_c0_g1:190-1149(+)	3prime_partial	_
TRINITY_DN10306_c0_g1	8.78303	8.23706	8.68749	11.4339	17.534	9.6595	393	_	_	_	_	_	_	_	_	_	_	_	_	_	_	_	_	_	_	_	_	_
TRINITY_DN10307_c0_g1	13.7833	12.7609	15.9766	5.74961	5.47515	2.29193	964	_	_	_	_	_	_	_	_	_	_	_	_	_	_	_	_	_	_	_	_	_
TRINITY_DN10308_c0_g1	0	0	0	0	0.144519	0	1030	_	_	_	_	_	_	_	_	_	_	_	_	_	_	_	_	_	_	m.729|TRINITY_DN10308_c0_g1:541-975(+)	complete	_
TRINITY_DN10309_c0_g1	1.16797	3.16867	2.48824	1.13215	2.02188	1.22986	1383	XP_021196934.1	XP_021196934.1 alpha-tocopherol transfer protein-like isoform X2 [Helicoverpa armigera]	90.2	_	_	_	_	_	_	_	_	_	_	_	_	_	_	_	m.651|TRINITY_DN10309_c0_g1:264-1217(+)	complete	PF00650.17|CRAL_TRIO|CRAL/TRIO domain|TRINITY_DN10309_c0_g1_i1|m.651:108-258
TRINITY_DN1030_c0_g1	0.020133	0.076988	0.074982	0.103792	0.179293	0.0978	1816	CAB3225174.1	CAB3225174.1 unnamed protein product [Arctia plantaginis]	72.2	_	_	_	_	_	_	_	_	_	_	_	_	_	_	_	_	_	_
TRINITY_DN10310_c0_g1	0.94042	0.941503	0.36891	0.597791	0.615339	0.240817	5613	KAF9417704.1	KAF9417704.1 hypothetical protein HW555_005285 [Spodoptera exigua]	63.5	_	_	_	_	_	_	_	_	_	_	_	_	_	_	_	m.722|TRINITY_DN10310_c0_g1:177-2150(+)	complete	PF02190.13|LON_substr_bdg|ATP-dependent protease La (LON) substrate-binding domain|TRINITY_DN10310_c0_g1_i3|m.722:444-561;PF13923.3|zf-C3HC4_2|Zinc finger, C3HC4 type (RING finger)|TRINITY_DN10310_c0_g1_i3|m.722:367-405;PF13920.3|zf-C3HC4_3|Zinc finger, C3HC4 type (RING finger)|TRINITY_DN10310_c0_g1_i3|m.722:365-408;PF13639.3|zf-RING_2|Ring finger domain|TRINITY_DN10310_c0_g1_i3|m.722:367-405;PF1…
TRINITY_DN10311_c0_g1	0.341764	0.051755	0	0.177312	0.190092	0	6424	XP_022817676.1	XP_022817676.1 probable ATP-dependent RNA helicase spindle-E [Spodoptera litura]	89.9	sp|B0XDC4|SPNE_CULQU	sp|B0XDC4|SPNE_CULQU Probable ATP-dependent RNA helicase spindle-E OS=Culex quinquefasciatus OX=7176 GN=spn-E PE=3 SV=1	56.8	_	_	_	_	_	_	GO:0007275|multicellular organism development;GO:0007283|spermatogenesis;GO:0030154|cell differentiation;GO:0031047|gene silencing by RNA;GO:0051321|meiotic cell cycle	GO:0005737|cytoplasm	GO:0003676|nucleic acid binding;GO:0003724|RNA helicase activity;GO:0005524|ATP binding	ko:K18408	TDRD9		m.733|TRINITY_DN10311_c0_g1:153-4487(+)	complete	PF00271.28|Helicase_C|Helicase conserved C-terminal domain|TRINITY_DN10311_c0_g1_i7|m.733:383-507;PF04408.20|HA2|Helicase associated domain (HA2)|TRINITY_DN10311_c0_g1_i7|m.733:574-667;PF00567.21|TUDOR|Tudor domain|TRINITY_DN10311_c0_g1_i7|m.733:904-1023;PF00270.26|DEAD|DEAD/DEAH box helicase|TRINITY_DN10311_c0_g1_i7|m.733:135-290
TRINITY_DN10311_c1_g1	0	0	0	0	0	0.591003	225	_	_	_	_	_	_	_	_	_	_	_	_	_	_	_	_	_	_	_	_	_
TRINITY_DN10312_c0_g1	0.083164	0.213131	0.070351	0.146904	0.210852	0.095114	3138	PZC83251.1	PZC83251.1 hypothetical protein B5X24_HaOG208015 [Helicoverpa armigera]	96.6	_	_	_	_	_	_	_	_	_	_	_	_	_	_	_	m.636|TRINITY_DN10312_c0_g1:68-436(+);m.635|TRINITY_DN10312_c0_g1:415-2643(+)	complete;complete	PF14291.3|DUF4371|Domain of unknown function (DUF4371)|TRINITY_DN10312_c0_g1_i2|m.635:89-331;PF05699.11|Dimer_Tnp_hAT|hAT family C-terminal dimerisation region|TRINITY_DN10312_c0_g1_i2|m.635:659-717
TRINITY_DN10313_c0_g1	0.76857	1.10546	0.625231	0.366438	1.16907	0.561765	8381	_	_	_	_	_	_	_	_	_	_	_	_	_	_	_	_	_	_	_	_	_
TRINITY_DN10314_c0_g1	0	0	0.117218	0.025754	0	0.086521	5711	XP_035455001.1	XP_035455001.1 UDP-glucuronosyltransferase 2B20-like [Spodoptera frugiperda]	86.4	sp|A0A291PQH4|UGT2_DACCO	sp|A0A291PQH4|UGT2_DACCO UDP-glucosyltransferase 2 OS=Dactylopius coccus OX=765876 GN=UTG2 PE=1 SV=1	50.7	_	_	_	_	_	_	GO:0016053|organic acid biosynthetic process	GO:0005783|endoplasmic reticulum;GO:0005789|endoplasmic reticulum membrane;GO:0016021|integral component of membrane	GO:0035251|UDP-glucosyltransferase activity	ko:K00699	UGT	path:ko00040;path:ko00053;path:ko00140;path:ko00830;path:ko00860;path:ko00980;path:ko00982;path:ko00983;path:ko01100;path:ko01110;path:ko05204	m.763|TRINITY_DN10314_c0_g1:4160-5710(+)	3prime_partial	PF00201.15|UDPGT|UDP-glucoronosyl and UDP-glucosyl transferase|TRINITY_DN10314_c0_g1_i8|m.763:31-506
TRINITY_DN10314_c1_g1	0.132474	0	0.234514	0.25296	0.099156	0.410282	517	_	_	_	_	_	_	_	_	_	_	_	_	_	_	_	_	_	_	_	_	_
TRINITY_DN10315_c0_g1	0	0.25585	0.249054	0	0.299304	0	4079	PCG77649.1	PCG77649.1 hypothetical protein B5V51_6728 [Heliothis virescens]	94	_	_	_	_	_	_	_	_	_	_	_	_	_	_	_	m.706|TRINITY_DN10315_c0_g1:97-2232(+)	complete	PF02437.14|Ski_Sno|SKI/SNO/DAC family|TRINITY_DN10315_c0_g1_i3|m.706:82-186
TRINITY_DN10316_c0_g1	1.5476	1.15483	0.803605	1.22097	0.729388	0.673163	1858	_	_	_	_	_	_	_	_	_	_	_	_	_	_	_	_	_	_	_	_	_
TRINITY_DN10317_c0_g1	0	5.33576	4.08212	0	6.77844	0	482	_	_	_	_	_	_	_	_	_	_	_	_	_	_	_	_	_	_	_	_	_
TRINITY_DN10317_c0_g2	0.73731	1.22695	0	0.566262	0	0.680297	1387	_	_	_	_	_	_	_	_	_	_	_	_	_	_	_	_	_	_	_	_	_
TRINITY_DN10317_c1_g1	0.765435	4.86093	1.81234	4.31562	3.16001	0	241	_	_	_	_	_	_	_	_	_	_	_	_	_	_	_	_	_	_	_	_	_
TRINITY_DN10317_c2_g1	0.419145	0	0.60051	0.307152	0.118207	0.122906	477	_	_	_	_	_	_	_	_	_	_	_	_	_	_	_	_	_	_	_	_	_
TRINITY_DN10318_c0_g1	1.04867	0.790058	1.19137	0.635327	1.40257	0.680307	5329	PZC86866.1	PZC86866.1 hypothetical protein B5X24_HaOG201725 [Helicoverpa armigera]	87.9	sp|Q9VT41|INT7_DROME	sp|Q9VT41|INT7_DROME Integrator complex subunit 7 OS=Drosophila melanogaster OX=7227 GN=defl PE=1 SV=1	49	_	_	_	_	_	_	GO:0016180|snRNA processing;GO:0034472|snRNA 3'-end processing	GO:0005634|nucleus;GO:0005737|cytoplasm;GO:0032039|integrator complex	_	ko:K13144	INTS7		m.643|TRINITY_DN10318_c0_g1:3789-5162(+);m.642|TRINITY_DN10318_c0_g1:63-2978(+)	complete;complete	PF13855.3|LRR_8|Leucine rich repeat|TRINITY_DN10318_c0_g1_i2|m.643:107-167;PF13855.3|LRR_8|Leucine rich repeat|TRINITY_DN10318_c0_g1_i2|m.643:231-289;PF13306.3|LRR_5|Leucine rich repeats (6 copies)|TRINITY_DN10318_c0_g1_i2|m.643:85-165;PF13306.3|LRR_5|Leucine rich repeats (6 copies)|TRINITY_DN10318_c0_g1_i2|m.643:231-300;PF00560.30|LRR_1|Leucine Rich Repeat|TRINITY_DN10318_c0_g1_i2|m.643:132-154;…
TRINITY_DN10318_c0_g2	6.96165	12.8831	7.88966	9.75477	13.0136	3.74284	354	_	_	_	_	_	_	_	_	_	_	_	_	_	_	_	_	_	_	_	_	_
TRINITY_DN10318_c1_g1	1.41786	0	0.054302	0.521584	0	0	802	_	_	_	_	_	_	_	_	_	_	_	_	_	_	_	_	_	_	_	_	_
TRINITY_DN10318_c1_g2	2.84759	0	0	1.82061	0	0	275	_	_	_	_	_	_	_	_	_	_	_	_	_	_	_	_	_	_	_	_	_
TRINITY_DN10318_c2_g1	0.149807	0.182719	0.093156	0.171279	0.039331	0.215036	2361	_	_	_	_	_	_	_	_	_	_	_	_	_	_	_	_	_	_	_	_	_
TRINITY_DN10318_c3_g1	0	0	1.38694	0	0	0	267	_	_	_	_	_	_	_	_	_	_	_	_	_	_	_	_	_	_	_	_	_
TRINITY_DN10319_c0_g1	5.14177	4.96782	4.67218	2.84534	3.61903	2.03195	1360	_	_	_	_	_	_	_	_	_	_	_	_	_	_	_	_	_	_	_	_	_
TRINITY_DN1031_c0_g1	9.01248	9.89853	5.88071	4.13116	21.2296	4.16722	4660	KPJ06508.1	KPJ06508.1 hypothetical protein RR48_14247, partial [Papilio machaon]	79.6	_	_	_	_	_	_	_	_	_	_	_	_	_	_	_	_	_	_
TRINITY_DN1031_c14_g1	0	0	0	0	0	0	202	_	_	_	_	_	_	_	_	_	_	_	_	_	_	_	_	_	_	_	_	_
TRINITY_DN1031_c15_g1	0.118203	0.050946	0.030828	0.145523	0.130897	0.026611	1206	_	_	_	_	_	_	_	_	_	_	_	_	_	_	_	_	_	_	_	_	_
TRINITY_DN1031_c16_g1	0.39569	0	0.400903	0	0	0	330	_	_	_	_	_	_	_	_	_	_	_	_	_	_	_	_	_	_	_	_	_
TRINITY_DN1031_c1_g1	4.09445	3.99062	4.22245	4.56581	2.39936	2.36029	1234	_	_	_	_	_	_	_	_	_	_	_	_	_	_	_	_	_	_	_	_	_
TRINITY_DN1031_c2_g1	7.26456	1.38757	4.14685	9.89058	2.7139	7.59366	1450	XP_014358783.1	XP_014358783.1 PREDICTED: uncharacterized protein LOC106711071 [Papilio machaon]	76.9	_	_	_	_	_	_	_	_	_	_	_	_	_	_	_	_	_	_
TRINITY_DN1031_c3_g1	5.01811	0	0	0	14.4679	0	1488	_	_	_	_	_	_	_	_	_	_	_	_	_	_	_	_	_	_	_	_	_
TRINITY_DN1031_c4_g1	0	0	0	0	3.00351	2.62807	237	_	_	_	_	_	_	_	_	_	_	_	_	_	_	_	_	_	_	_	_	_
TRINITY_DN1031_c4_g2	0.764918	0.710858	0	0	0	0	221	_	_	_	_	_	_	_	_	_	_	_	_	_	_	_	_	_	_	_	_	_
TRINITY_DN1031_c5_g1	3.20442	3.73846	0.639951	2.45363	4.06228	0.703049	1650	CAD7476506.1	CAD7476506.1 unnamed protein product [Plutella xylostella]	84.1	_	_	_	_	_	_	_	_	_	_	_	_	_	_	_	m.3225|TRINITY_DN1031_c5_g1:374-1246(+)	complete	PF00078.24|RVT_1|Reverse transcriptase (RNA-dependent DNA polymerase)|TRINITY_DN1031_c5_g1_i2|m.3225:122-285
TRINITY_DN1031_c5_g2	0.431466	0.41131	0.162921	0.677557	0.653302	0.055024	882	ADZ95895.1	ADZ95895.1 reverse transcriptase, partial [Erinnyis ello]	85.5	_	_	_				_	KOG1075	_	_	_	_	_	_	_	_	_	_
TRINITY_DN1031_c6_g1	0	0.452369	0	0	0	0	294	XP_014360163.1	XP_014360163.1 PREDICTED: uncharacterized protein LOC106712191 [Papilio machaon]	88.8	_	_	_	_	_	_	_	_	_	_	_	_	_	_	_	_	_	_
TRINITY_DN1031_c7_g1	163.282	151.926	126.359	118.443	209.668	115.25	3030	XP_022830539.1	XP_022830539.1 aconitate hydratase, mitochondrial [Spodoptera litura]	96.1	sp|P34455|ACON_CAEEL	sp|P34455|ACON_CAEEL Probable aconitate hydratase, mitochondrial OS=Caenorhabditis elegans OX=6239 GN=aco-2 PE=3 SV=2	87.3	_	_	_	_	_	_	GO:0006099|tricarboxylic acid cycle	GO:0005739|mitochondrion;GO:0005829|cytosol	GO:0003994|aconitate hydratase activity;GO:0046872|metal ion binding;GO:0047780|citrate dehydratase activity;GO:0051539|4 iron, 4 sulfur cluster binding	ko:K01681	ACO, acnA	path:ko00020;path:ko00630;path:ko00720;path:ko01100;path:ko01110;path:ko01120;path:ko01130;path:ko01200;path:ko01210;path:ko01230	m.3226|TRINITY_DN1031_c7_g1:162-2513(+)	complete	PF00330.17|Aconitase|Aconitase family (aconitate hydratase)|TRINITY_DN1031_c7_g1_i1|m.3226:68-504;PF00694.16|Aconitase_C|Aconitase C-terminal domain|TRINITY_DN1031_c7_g1_i1|m.3226:583-712
TRINITY_DN1031_c7_g2	0.578812	0.976796	0.449668	1.38888	1.99543	0.601497	784	_	_	_	_	_	_	_	_	_	_	_	_	_	_	_	_	_	_	_	_	_
TRINITY_DN1031_c8_g1	0	0.673995	0	0	0	0	231	_	_	_	_	_	_	_	_	_	_	_	_	_	_	_	_	_	_	_	_	_
TRINITY_DN1031_c9_g1	5.01987	85.5756	78.1379	88.6888	34.8552	6.68778	234	_	_	_	_	_	_	_	_	_	_	_	_	_	_	_	_	_	_	_	_	_
TRINITY_DN1031_c9_g2	6.25651	2.38681	1.1139	0	2.3183	2.32456	3145	_	_	_	_	_	_	_	_	_	_	_	_	_	_	_	_	_	_	_	_	_
TRINITY_DN10320_c0_g1	1.089	1.07663	1.04135	0.82937	0.350039	0.433278	2789	_	_	_	_	_	_	_	_	_	_	_	_	_	_	_	_	_	_	_	_	_
TRINITY_DN10321_c0_g1	0.113471	0.414869	0.083037	0	0.285218	0.287492	1782	_	_	_	_	_	_	_	_	_	_	_	_	_	_	_	_	_	_	_	_	_
TRINITY_DN10321_c1_g1	0	0	0	0	0.535229	0	1494	XP_022837506.1	XP_022837506.1 doublesex- and mab-3-related transcription factor A2 isoform X4 [Spodoptera litura]	98.4	sp|Q9XWN9|DMD3_CAEEL	sp|Q9XWN9|DMD3_CAEEL Doublesex- and mab-3-related transcription factor dmd-3 OS=Caenorhabditis elegans OX=6239 GN=dmd-3 PE=2 SV=2	74.2	_	_	_	_	_	_	GO:0006357|regulation of transcription by RNA polymerase II;GO:0007548|sex differentiation;GO:0010629|negative regulation of gene expression;GO:0045138|nematode male tail tip morphogenesis;GO:0045944|positive regulation of transcription by RNA polymerase II;GO:0048664|neuron fate determination;GO:0048675|axon extension;GO:0110037|regulation of nematode male tail tip morphogenesis;GO:0110039|posit…	GO:0005634|nucleus;GO:0043025|neuronal cell body;GO:0043204|perikaryon	GO:0000977|RNA polymerase II transcription regulatory region sequence-specific DNA binding;GO:0003700|DNA-binding transcription factor activity;GO:0046872|metal ion binding	ko:K19491	DMRT4_5, DMRTA		m.664|TRINITY_DN10321_c1_g1:101-1237(+)	complete	PF00751.15|DM|DM DNA binding domain|TRINITY_DN10321_c1_g1_i1|m.664:42-88;PF03474.11|DMA|DMRTA motif|TRINITY_DN10321_c1_g1_i1|m.664:241-277
TRINITY_DN10322_c0_g1	0.129414	0.566139	0.140964	0.104217	0.091965	0	1791	XP_021197953.1	XP_021197953.1 fatty acyl-CoA reductase wat-like [Helicoverpa armigera]	92	sp|A1ZAI5|FACR1_DROME	sp|A1ZAI5|FACR1_DROME Putative fatty acyl-CoA reductase CG5065 OS=Drosophila melanogaster OX=7227 GN=CG5065 PE=3 SV=1	55.1	_	_	_	_	_	_	GO:0008611|ether lipid biosynthetic process;GO:0010025|wax biosynthetic process;GO:0035336|long-chain fatty-acyl-CoA metabolic process	GO:0005777|peroxisome;GO:0005778|peroxisomal membrane;GO:0005779|integral component of peroxisomal membrane;GO:0043231|intracellular membrane-bounded organelle	GO:0080019|fatty-acyl-CoA reductase (alcohol-forming) activity;GO:0102965|alcohol-forming fatty acyl-CoA reductase activity	ko:K13356	FAR	path:ko00073;path:ko04146;path:ko04212	m.685|TRINITY_DN10322_c0_g1:1-1500(+)	5prime_partial	PF07993.9|NAD_binding_4|Male sterility protein|TRINITY_DN10322_c0_g1_i3|m.685:14-289;PF03015.16|Sterile|Male sterility protein|TRINITY_DN10322_c0_g1_i3|m.685:359-451;PF01073.16|3Beta_HSD|3-beta hydroxysteroid dehydrogenase/isomerase family|TRINITY_DN10322_c0_g1_i3|m.685:13-154;PF01370.18|Epimerase|NAD dependent epimerase/dehydratase family|TRINITY_DN10322_c0_g1_i3|m.685:12-238;PF02719.12|Polysacc…
TRINITY_DN10322_c0_g2	0.21937	0	0	0.16307	1.08603	0	403	PCG71095.1	PCG71095.1 hypothetical protein B5V51_2256, partial [Heliothis virescens]	96.7	_	_	_	_	_	_	_	_	_	_	_	_	ko:K13356	FAR	path:ko00073;path:ko04146;path:ko04212	_	_	_
TRINITY_DN10323_c0_g1	0.192844	0.119533	0.151135	0.051779	0.407407	0.032316	3490	_	_	_	_	_	_	_	_	_	_	_	_	_	_	_	_	_	_	_	_	_
TRINITY_DN10323_c0_g2	0.188144	0.099766	0	0	0.155568	0	3963	PCG69567.1	PCG69567.1 hypothetical protein B5V51_3955 [Heliothis virescens]	97.1	_	_	_	_	_	_	_	_	_	_	_	_	_	_	_	m.742|TRINITY_DN10323_c0_g2:233-2638(+)	complete	PF13855.3|LRR_8|Leucine rich repeat|TRINITY_DN10323_c0_g2_i1|m.742:130-186;PF13855.3|LRR_8|Leucine rich repeat|TRINITY_DN10323_c0_g2_i1|m.742:151-210;PF13855.3|LRR_8|Leucine rich repeat|TRINITY_DN10323_c0_g2_i1|m.742:174-234;PF13855.3|LRR_8|Leucine rich repeat|TRINITY_DN10323_c0_g2_i1|m.742:224-283;PF13855.3|LRR_8|Leucine rich repeat|TRINITY_DN10323_c0_g2_i1|m.742:249-307;PF13855.3|LRR_8|Leucine …
TRINITY_DN10324_c0_g1	0.191272	0	0	0	0	0.126853	1349	_	_	_	_	_	_	_	_	_	_	_	_	_	_	_	_	_	_	_	_	_
TRINITY_DN10324_c1_g1	0.613052	0.168012	0	0	0	0	413	_	_	_	_	_	_	_	_	_	_	_	_	_	_	_	_	_	_	_	_	_
TRINITY_DN10324_c2_g1	0.590673	0.155863	0.141333	0.128607	0.608704	0.040774	883	_	_	_	_	_	_	_	_	_	_	_	_	_	_	_	_	_	_	_	_	_
TRINITY_DN10324_c3_g1	1.69166	1.03308	1.2502	0.305851	0	0.339847	327	_	_	_	_	_	_	_	_	_	_	_	_	_	_	_	_	_	_	_	_	_
TRINITY_DN10324_c4_g1	0.205777	0	0	0.305652	0.170346	0.17825	412	_	_	_	_	_	_	_	_	_	_	_	_	_	_	_	_	_	_	_	_	_
TRINITY_DN10325_c0_g1	5.66603	12.1677	4.34122	14.8922	25.6784	27.9693	1466	KPJ09174.1	KPJ09174.1 Peptidoglycan-recognition protein LF [Papilio machaon]	59.6	sp|Q765P4|PGRP1_HOLDI	sp|Q765P4|PGRP1_HOLDI Peptidoglycan-recognition protein 1 OS=Holotrichia diomphalia OX=33394 GN=PGRP-1 PE=1 SV=1	59	_	_	_	_	_	_	GO:0009253|peptidoglycan catabolic process;GO:0045087|innate immune response	GO:0005576|extracellular region	GO:0008270|zinc ion binding;GO:0008745|N-acetylmuramoyl-L-alanine amidase activity;GO:0042834|peptidoglycan binding	ko:K01446	PGRP		m.688|TRINITY_DN10325_c0_g1:3-1094(+)	5prime_partial	PF01510.22|Amidase_2|N-acetylmuramoyl-L-alanine amidase|TRINITY_DN10325_c0_g1_i1|m.688:186-316
TRINITY_DN10326_c0_g1	0	0.375041	0.210032	0	0.356571	0	4391	XP_022827576.1	XP_022827576.1 uncharacterized protein LOC111357208 [Spodoptera litura]	69.1	sp|Q9VH20|TAF1B_DROME	sp|Q9VH20|TAF1B_DROME TATA box-binding protein-associated factor RNA polymerase I subunit B OS=Drosophila melanogaster OX=7227 GN=TAF1B PE=1 SV=1	51.9	_	_	_	_	_	_	GO:0001188|RNA polymerase I preinitiation complex assembly;GO:0042790|nucleolar large rRNA transcription by RNA polymerase I	GO:0005668|RNA polymerase transcription factor SL1 complex;GO:0005730|nucleolus;GO:0070860|RNA polymerase I core factor complex	GO:0001164|RNA polymerase I core promoter sequence-specific DNA binding;GO:0046872|metal ion binding	ko:K15213	TAF1B		m.703|TRINITY_DN10326_c0_g1:72-3638(+)	complete	PF11781.5|zf-RRN7|Zinc-finger of RNA-polymerase I-specific TFIIB, Rrn7|TRINITY_DN10326_c0_g1_i2|m.703:5-30
TRINITY_DN10326_c1_g1	0.219295	0.488274	0.377873	0.310942	0.223324	0.099043	2025	_	_	_	_	_	_	_	_	_	_	_	_	_	_	_	_	_	_	_	_	_
TRINITY_DN10327_c0_g1	0.734154	0	0	0	0	0	229	_	_	_	_	_	_	_	_	_	_	_	_	_	_	_	_	_	_	_	_	_
TRINITY_DN10327_c0_g2	0.034347	0.152759	0.055326	0.096154	0.213341	0.046905	2388	_	_	_	_	_	_	_	_	_	_	_	_	_	_	_	_	_	_	_	_	_
TRINITY_DN10327_c0_g3	0.606502	0.302912	0.524622	0.297972	0.707036	0.405205	949	_	_	_	_	_	_	_	_	_	_	_	_	_	_	_	_	_	_	_	_	_
TRINITY_DN10327_c0_g4	0.85364	1.41927	0	0.501263	0.841262	1.4422	347	_	_	_	_	_	_	_	_	_	_	_	_	_	_	_	_	_	_	_	_	_
TRINITY_DN10327_c0_g5	0.181327	0.29926	0.179689	0.939606	0.302345	0.157934	431	_	_	_	_	_	_	_	_	_	_	_	_	_	_	_	_	_	_	_	_	_
TRINITY_DN10328_c0_g1	5.24699	3.64924	3.27448	0	0	0.92663	275	PZC87130.1	PZC87130.1 hypothetical protein B5X24_HaOG201366 [Helicoverpa armigera]	84.6	_	_	_	_	_	_	_	_	_	_	_	_	ko:K04437	FLNA	path:ko04010;path:ko04510;path:ko05132;path:ko05205	_	_	_
TRINITY_DN10329_c0_g1	0.516167	0.437982	0.420156	0.186053	0.13147	0.162294	2494	PZC74676.1	PZC74676.1 hypothetical protein B5X24_HaOG207345 [Helicoverpa armigera]	91	_	_	_	_	_	_	_	_	_	_	_	_	_	_	_	m.718|TRINITY_DN10329_c0_g1:1466-2398(+)	complete	PF00650.17|CRAL_TRIO|CRAL/TRIO domain|TRINITY_DN10329_c0_g1_i2|m.718:112-252
TRINITY_DN1032_c0_g1	0	0.372829	0.328143	0	0.466891	0	871	_	_	_	_	_	_	_	_	_	_	_	_	_	_	_	_	_	_	_	_	_
TRINITY_DN1032_c0_g2	0	0.068546	0.149886	0.162486	0.030038	0.029133	3444	_	_	_	_	_	_	_	_	_	_	_	_	_	_	_	_	_	_	_	_	_
TRINITY_DN10330_c0_g1	0.147214	0.089456	0.109356	0.157841	0.294481	0	5174	PCG77029.1	PCG77029.1 hypothetical protein B5V51_8207 [Heliothis virescens]	64.6	_	_	_	_	_	_	_	_	_	_	_	_	_	_	_	m.726|TRINITY_DN10330_c0_g1:2048-5032(+);m.727|TRINITY_DN10330_c0_g1:598-1500(+)	complete;complete	PF00078.24|RVT_1|Reverse transcriptase (RNA-dependent DNA polymerase)|TRINITY_DN10330_c0_g1_i1|m.726:542-799;PF03372.20|Exo_endo_phos|Endonuclease/Exonuclease/phosphatase family|TRINITY_DN10330_c0_g1_i1|m.726:58-235
TRINITY_DN10331_c0_g1	0.055614	0.285224	0.057441	0.199287	0	0	773	_	_	_	_	_	_	_	_	_	_	_	_	_	_	_	_	_	_	_	_	_
TRINITY_DN10331_c1_g1	0.42907	1.44721	0	0	0	0	320	_	_	_	_	_	_	_	_	_	_	_	_	_	_	_	_	_	_	_	_	_
TRINITY_DN10332_c0_g1	2.34045	4.09419	2.83062	5.07274	2.70828	3.8252	1157	PCG68260.1	PCG68260.1 hypothetical protein B5V51_5431 [Heliothis virescens]	84.5	_	_	_	_	_	_	_	_	_	_	_	_	_	_	_	m.622|TRINITY_DN10332_c0_g1:159-917(+)	complete	PF12756.4|zf-C2H2_2|C2H2 type zinc-finger (2 copies)|TRINITY_DN10332_c0_g1_i1|m.622:63-143;PF12756.4|zf-C2H2_2|C2H2 type zinc-finger (2 copies)|TRINITY_DN10332_c0_g1_i1|m.622:166-250
TRINITY_DN10333_c0_g1	1025.25	312.526	451.421	0	0	0	361	_	_	_	_	_	_	_	_	_	_	_	_	_	_	_	_	_	_	_	_	_
TRINITY_DN10334_c0_g1	0.181809	0.090302	0.201859	0.228982	0	0.198293	6266	XP_021193305.1	XP_021193305.1 protein FAM135A isoform X4 [Helicoverpa armigera]	95.9	_	_	_	_	_	_	_	_	_	_	_	_	_	_	_	m.618|TRINITY_DN10334_c0_g1:173-5575(+)	complete	PF05057.11|DUF676|Putative serine esterase (DUF676)|TRINITY_DN10334_c0_g1_i7|m.618:1530-1721;PF12394.5|DUF3657|Protein of unknown function (DUF3657)|TRINITY_DN10334_c0_g1_i7|m.618:117-172
TRINITY_DN10335_c0_g1	0.383493	0.455804	0.550122	0.219595	0.39961	0.136704	638	_	_	_	_	_	_	_	_	_	_	_	_	_	_	_	_	_	_	_	_	_
TRINITY_DN10335_c0_g2	0	0.234867	0	0.273638	0.240766	0	779	KAF9798441.1	KAF9798441.1 hypothetical protein SFRURICE_008130 [Spodoptera frugiperda]	70.2	_	_	_	_	_	_	_	_	_	_	_	_	_	_	_	_	_	_
TRINITY_DN10335_c0_g3	0.437543	0.074037	0	0.31443	0	0	594	_	_	_	_	_	_	_	_	_	_	_	_	_	_	_	_	_	_	_	_	_
TRINITY_DN10336_c0_g1	0.274217	0.231815	0.12293	0.010385	0.332478	0.15497	4268	XP_022824062.1	XP_022824062.1 kinesin-like protein KIF23 [Spodoptera litura]	94.9	sp|Q9V877|SUB_DROME	sp|Q9V877|SUB_DROME Kinesin-like protein subito OS=Drosophila melanogaster OX=7227 GN=sub PE=1 SV=1	50.4	_	_	_	_	_	_	GO:0000212|meiotic spindle organization;GO:0000278|mitotic cell cycle;GO:0007018|microtubule-based movement;GO:0007052|mitotic spindle organization;GO:0007091|metaphase/anaphase transition of mitotic cell cycle;GO:0007140|male meiotic nuclear division;GO:0016321|female meiosis chromosome segregation;GO:0040016|embryonic cleavage;GO:0051257|meiotic spindle midzone assembly	GO:0000922|spindle pole;GO:0005634|nucleus;GO:0005737|cytoplasm;GO:0005871|kinesin complex;GO:0005874|microtubule;GO:0005875|microtubule associated complex;GO:0005876|spindle microtubule;GO:0051233|spindle midzone	GO:0003777|microtubule motor activity;GO:0005524|ATP binding;GO:0008017|microtubule binding;GO:0016887|ATPase activity	ko:K17387	KIF23	path:ko05206	m.717|TRINITY_DN10336_c0_g1:60-2717(+)	complete	PF00225.20|Kinesin|Kinesin motor domain|TRINITY_DN10336_c0_g1_i2|m.717:35-432;PF16540.2|MKLP1_Arf_bdg|Arf6-interacting domain of mitotic kinesin-like protein 1|TRINITY_DN10336_c0_g1_i2|m.717:736-840;PF16796.2|Microtub_bd|Microtubule binding|TRINITY_DN10336_c0_g1_i2|m.717:30-155
TRINITY_DN10336_c1_g1	3.12493	1.9346	2.8593	0.909535	1.81115	0.353451	320	KAF9817788.1	KAF9817788.1 hypothetical protein SFRURICE_013521, partial [Spodoptera frugiperda]	77.3	_	_	_	_	_	_	_	_	_	_	_	_	_	_	_	_	_	_
TRINITY_DN10336_c1_g2	2.17517	5.21683	1.18916	0	0.458788	0	287	XP_035439100.1	XP_035439100.1 uncharacterized protein LOC118268640, partial [Spodoptera frugiperda]	76.8	_	_	_	_	_	_	_	_	_	_	_	_	_	_	_	_	_	_
TRINITY_DN10336_c2_g1	0.101008	0.057969	0.035069	0.071167	0	0	1093	_	_	_	_	_	_	_	_	_	_	_	_	_	_	_	_	_	_	_	_	_
TRINITY_DN10336_c3_g1	0	0	0.559514	0	0	0.49175	425	PZC81710.1	PZC81710.1 hypothetical protein B5X24_HaOG212154 [Helicoverpa armigera]	63.6	_	_	_	_	_	_	_	_	_	_	_	_	_	_	_	_	_	_
TRINITY_DN10336_c4_g1	0	0	0.589685	0	0	0.433405	288	_	_	_	_	_	_	_	_	_	_	_	_	_	_	_	_	_	_	_	_	_
TRINITY_DN10337_c0_g1	0.235815	0.142996	0.097738	0.166972	0.373257	0.465368	861	_	_	_	_	_	_	_	_	_	_	_	_	_	_	_	_	_	_	_	_	_
TRINITY_DN10338_c0_g1	0	0.708906	0	0	0	0	353	_	_	_	_	_	_	_	_	_	_	_	_	_	_	_	_	_	_	_	_	_
TRINITY_DN10338_c0_g2	0.139898	0.110566	0	0.140017	0.426384	0.126169	1649	PCG63603.1	PCG63603.1 hypothetical protein B5V51_12007, partial [Heliothis virescens]	97	_	_	_	_	_	_	_	_	_	_	_	_	_	_	_	_	_	_
TRINITY_DN10338_c0_g3	0.494609	1.21908	0.525513	0	0.827968	0	301	PCG63602.1	PCG63602.1 hypothetical protein B5V51_12007, partial [Heliothis virescens]	100	_	_	_	_	_	_	_	_	_	_	_	_	_	_	_	_	_	_
TRINITY_DN10339_c0_g1	0.876935	0.883621	0.593513	0.597398	1.43379	0.523654	2747	XP_021185704.1	XP_021185704.1 tetratricopeptide repeat protein 5-like isoform X1 [Helicoverpa armigera]	96	_	_	_	_	_	_	_	_	_	_	_	_	_	_	_	m.730|TRINITY_DN10339_c0_g1:78-1433(+)	complete	PF16669.2|TTC5_OB|Tetratricopeptide repeat protein 5 OB fold domain|TRINITY_DN10339_c0_g1_i8|m.730:330-441
TRINITY_DN10339_c1_g1	1.42006	0.760724	0	0	0	0	523	_	_	_	_	_	_	_	_	_	_	_	_	_	_	_	_	_	_	_	_	_
TRINITY_DN10339_c1_g2	0.762003	0.447587	0.709244	0.279188	1.40244	0.325963	637	_	_	_	_	_	_	_	_	_	_	_	_	_	_	_	_	_	_	_	_	_
TRINITY_DN10339_c2_g1	0.391156	0.47876	0.474046	0.660295	0.285412	0.218059	957	PCG62952.1	PCG62952.1 hypothetical protein B5V51_13323 [Heliothis virescens]	100	_	_	_	_	_	_	_	_	_	_	_	_	ko:K11279	NAP1L1, NRP		_	_	_
TRINITY_DN1033_c0_g1	1.89548	0	0	1.4564	0	0	11595	_	_	_	_	_	_	_	_	_	_	_	_	_	_	_	_	_	_	m.699|TRINITY_DN1033_c0_g1:9841-10203(+)	complete	_
TRINITY_DN1033_c1_g1	1.80153	4.78906	4.1529	0	5.3104	2.14861	624	_	_	_	_	_	_	_	_	_	_	_	_	_	_	_	_	_	_	_	_	_
TRINITY_DN1033_c1_g2	0.749437	2.08427	2.28479	0	2.46935	0.633118	3449	KAF9408084.1	KAF9408084.1 hypothetical protein HW555_012106 [Spodoptera exigua]	99.3	_	_	_	_	_	_	_	_	_	_	_	_	ko:K12479	VPS45	path:ko04138;path:ko04144	m.717|TRINITY_DN1033_c1_g2:2200-3447(+)	3prime_partial	PF00995.20|Sec1|Sec1 family|TRINITY_DN1033_c1_g2_i5|m.717:23-408
TRINITY_DN1033_c1_g3	0	0	0	0	0	0	512	PCG71978.1	PCG71978.1 hypothetical protein B5V51_1284, partial [Heliothis virescens]	98.8	_	_	_	_	_	_	_	_	_	_	_	_	ko:K12479	VPS45	path:ko04138;path:ko04144	m.719|TRINITY_DN1033_c1_g3:1-510(+)	internal	PF00995.20|Sec1|Sec1 family|TRINITY_DN1033_c1_g3_i1|m.719:2-163
TRINITY_DN1033_c1_g4	3.37708	8.04864	0	0	0	0.68102	252	KAF9796625.1	KAF9796625.1 hypothetical protein SFRURICE_012718 [Spodoptera frugiperda]	97.3	_	_	_	_	_	_	_	_	_	_	_	_	ko:K12479	VPS45	path:ko04138;path:ko04144	_	_	_
TRINITY_DN1033_c2_g1	0.873292	1.03532	0.723365	0.948259	0.731376	0.554067	2309	_	_	_	_	_	_	_	_	_	_	_	_	_	_	_	_	_	_	_	_	_
TRINITY_DN1033_c2_g2	1.20681	0.868205	0.887423	0.61967	2.06356	0.389104	1866	_	_	_	_	_	_	_	_	_	_	_	_	_	_	_	_	_	_	_	_	_
TRINITY_DN1033_c3_g1	0	0.967237	0	1.03268	0	0	405	_	_	_	_	_	_	_	_	_	_	_	_	_	_	_	_	_	_	_	_	_
TRINITY_DN1033_c3_g2	0.614688	0	0	0	0	0.485811	265	_	_	_	_	_	_	_	_	_	_	_	_	_	_	_	_	_	_	_	_	_
TRINITY_DN10340_c0_g1	0.227293	0.066405	0	0.062998	0.380634	0.095642	4811	KAF9806583.1	KAF9806583.1 hypothetical protein SFRURICE_012120, partial [Spodoptera frugiperda]	55.2	_	_	_	_	_	_	_	_	_	_	_	_	_	_	_	m.684|TRINITY_DN10340_c0_g1:4398-4811(+)	3prime_partial	_
TRINITY_DN10341_c0_g1	0.81166	0.660311	0.385277	0.303233	0.279587	0.41327	381	_	_	_	_	_	_	_	_	_	_	_	_	_	_	_	_	_	_	_	_	_
TRINITY_DN10341_c0_g2	0	0.387888	0	3.44347	0	3.14195	340	_	_	_	_	_	_	_	_	_	_	_	_	_	_	_	_	_	_	_	_	_
TRINITY_DN10341_c0_g3	7.24334	4.47218	0.958567	2.08126	5.6207	5.47861	371	PCG76846.1	PCG76846.1 hypothetical protein B5V51_8559 [Heliothis virescens]	62.7	_	_	_	_	_	_	_	_	_	_	_	_	_	_	_	m.687|TRINITY_DN10341_c0_g3:3-371(+)	internal	_
TRINITY_DN10341_c1_g1	0	0	0	0	12.6984	0	201	_	_	_	_	_	_	_	_	_	_	_	_	_	_	_	_	_	_	_	_	_
TRINITY_DN10342_c0_g1	0.848336	0.838174	0.068387	0.046607	0.264995	0	773	_	_	_	_	_	_	_	_	_	_	_	_	_	_	_	_	_	_	_	_	_
TRINITY_DN10343_c0_g1	0.235142	0	0	0	0	0	1987	_	_	_	_	_	_	_	_	_	_	_	_	_	_	_	_	_	_	_	_	_
TRINITY_DN10343_c1_g1	0	0	0.939204	0	0	0	217	_	_	_	_	_	_	_	_	_	_	_	_	_	_	_	_	_	_	_	_	_
TRINITY_DN10343_c1_g2	2.61456	0.931324	1.12696	4.22165	2.97302	0.311637	337	_	_	_	_	_	_	_	_	_	_	_	_	_	_	_	_	_	_	_	_	_
TRINITY_DN10343_c2_g1	1.3619	2.25064	0	0	0	0.286224	348	_	_	_	_	_	_	_	_	_	_	_	_	_	_	_	_	_	_	_	_	_
TRINITY_DN10344_c0_g1	1.88903	0	1.76057	2.21695	7.11869	1.89167	288	KAF9420680.1	KAF9420680.1 hypothetical protein HW555_003227 [Spodoptera exigua]	79.5	_	_	_	_	_	_	_	_	_	_	_	_	_	_	_	_	_	_
TRINITY_DN10345_c0_g1	0	19.4571	16.5065	0	0	14.7493	685	XP_022817598.1	XP_022817598.1 uncharacterized protein LOC111350317 [Spodoptera litura]	82.6	_	_	_	_	_	_	_	_	_	_	_	_	_	_	_	m.630|TRINITY_DN10345_c0_g1:1-684(+)	internal	_
TRINITY_DN10346_c0_g1	0.209547	0	0.041945	0.180479	0.258319	0.197205	1029	_	_	_	_	_	_	_	_	_	_	_	_	_	_	_	_	_	_	_	_	_
TRINITY_DN10346_c1_g1	1.34018	0.799948	0.209104	0.284055	0.72673	0.189418	1128	_	_	_	_	_	_	_	_	_	_	_	_	_	_	_	_	_	_	_	_	_
TRINITY_DN10346_c1_g2	0.559842	0	0	0.381963	0.474772	0	282	_	_	_	_	_	_	_	_	_	_	_	_	_	_	_	_	_	_	_	_	_
TRINITY_DN10346_c2_g1	0.526221	0.459784	0	0	0.442505	0	292	_	_	_	_	_	_	_	_	_	_	_	_	_	_	_	_	_	_	_	_	_
TRINITY_DN10346_c3_g1	0.73538	0	0	0	0	0	339	_	_	_	_	_	_	_	_	_	_	_	_	_	_	_	_	_	_	_	_	_
TRINITY_DN10347_c0_g1	12.4937	15.4589	16.2433	6.6132	6.20043	2.76522	1520	_	_	_	_	_	_	_	_	_	_	_	_	_	_	_	_	_	_	_	_	_
TRINITY_DN10348_c0_g1	0	0.086092	0	0.332144	0	0.083892	1321	KAF9422965.1	KAF9422965.1 hypothetical protein HW555_001508 [Spodoptera exigua]	53	_	_	_	_	_	_	_	_	_	_	_	_	_	_	_	m.700|TRINITY_DN10348_c0_g1:3-1070(+)	5prime_partial	_
TRINITY_DN10349_c0_g1	0.175168	0.157564	0.22749	0.323844	0.138809	0.109388	4150	PCG73062.1	PCG73062.1 hypothetical protein B5V51_188 [Heliothis virescens]	99.5	_	_	_	_	_	_	_	_	_	_	_	_	ko:K10436	MAPRE		m.755|TRINITY_DN10349_c0_g1:2445-2789(+);m.754|TRINITY_DN10349_c0_g1:551-1060(+)	complete;complete	PF00307.28|CH|Calponin homology (CH) domain|TRINITY_DN10349_c0_g1_i13|m.754:16-91;PF03271.14|EB1|EB1-like C-terminal motif|TRINITY_DN10349_c0_g1_i13|m.755:51-90
TRINITY_DN10349_c1_g1	1.68857	1.37724	1.10521	0	0	0.096584	532	_	_	_	_	_	_	_	_	_	_	_	_	_	_	_	_	_	_	_	_	_
TRINITY_DN1034_c0_g1	1.00079	1.19004	1.39455	0.992696	19.6968	1.56519	4657	XP_022824779.1	XP_022824779.1 actin-binding Rho-activating protein-like [Spodoptera litura]	99.5	_	_	_	_	_	_	_	_	_	_	_	_	_	_	_	m.427|TRINITY_DN1034_c0_g1:117-695(+)	complete	PF14705.3|Costars|Costars|TRINITY_DN1034_c0_g1_i2|m.427:83-166
TRINITY_DN10350_c0_g1	0.66297	0.150009	0.670427	0.274264	0.510997	0.889419	598	XP_026762896.1	XP_026762896.1 protein cueball isoform X2 [Galleria mellonella]	57.4	_	_	_	_	_	_	_	_	_	_	_	_	_	_	_	m.653|TRINITY_DN10350_c0_g1:1-597(+)	internal	_
TRINITY_DN10351_c0_g1	0.174026	0.259463	0.247444	0.032874	0.35151	0.142223	2600	_	_	_	_	_	_	_	_	_	_	_	_	_	_	_	_	_	_	_	_	_
TRINITY_DN10351_c0_g2	0.827495	1.06429	0.571878	0.553129	1.01117	0.494991	876	_	_	_	_	_	_	_	_	_	_	_	_	_	_	_	_	_	_	_	_	_
TRINITY_DN10351_c1_g1	0.484088	0	0	0	0	0	304	_	_	_	_	_	_	_	_	_	_	_	_	_	_	_	_	_	_	_	_	_
TRINITY_DN10352_c0_g1	0.625259	2.92449	0.614499	0.645562	0.835254	1.71505	517	_	_	_	_	_	_	_	_	_	_	_	_	_	_	_	_	_	_	_	_	_
TRINITY_DN10352_c0_g2	8.36576	0	9.77473	20.6047	0	0	203	_	_	_	_	_	_	_	_	_	_	_	_	_	_	_	_	_	_	_	_	_
TRINITY_DN10352_c1_g1	2.00075	2.13339	2.07458	2.2016	0.882233	0.284949	2916	_	_	_	_	_	_	_	_	_	_	_	_	_	_	_	_	_	_	_	_	_
TRINITY_DN10352_c2_g1	0.575485	0.352018	0.209576	0.376555	0.531618	0.617395	757	_	_	_	_	_	_	_	_	_	_	_	_	_	_	_	_	_	_	_	_	_
TRINITY_DN10352_c3_g1	0.447395	0.605509	0	0.405487	0.095679	0	526	_	_	_	_	_	_	_	_	_	_	_	_	_	_	_	_	_	_	_	_	_
TRINITY_DN10352_c4_g1	0	1.37046	0	0	0	0	228	_	_	_	_	_	_	_	_	_	_	_	_	_	_	_	_	_	_	_	_	_
TRINITY_DN10353_c0_g1	11.7486	1.87039	3.72005	1.93053	0.762496	0.376059	311	_	_	_	_	_	_	_	_	_	_	_	_	_	_	_	_	_	_	_	_	_
TRINITY_DN10353_c1_g1	0	0.721139	0	0	0	0	366	_	_	_	_	_	_	_	_	_	_	_	_	_	_	_	_	_	_	_	_	_
TRINITY_DN10353_c1_g2	0	0.391748	0.479064	0.96628	0.381248	0.376059	311	_	_	_	_	_	_	_	_	_	_	_	_	_	_	_	_	_	_	_	_	_
TRINITY_DN10354_c0_g1	11.3346	0	0	9.50517	11.0451	0	241	_	_	_	_	_	_	_	_	_	_	_	_	_	_	_	_	_	_	_	_	_
TRINITY_DN10355_c0_g1	0	0	0	0	0	0	2818	_	_	_	_	_	_	_	_	_	_	_	_	_	_	_	_	_	_	_	_	_
TRINITY_DN10355_c0_g2	0	0	0	0.346922	0	0.406644	299	_	_	_	_	_	_	_	_	_	_	_	_	_	_	_	_	_	_	_	_	_
TRINITY_DN10356_c0_g1	0.73453	0.522652	0.166429	0.112434	0.169587	0.114976	1137	PZC81529.1	PZC81529.1 hypothetical protein B5X24_HaOG212453 [Helicoverpa armigera]	65.5	_	_	_	_	_	_	_	_	_	_	_	_	_	_	_	_	_	_
TRINITY_DN10357_c0_g1	0.253297	0	0	0	0	0	2497	KAF9803386.1	KAF9803386.1 hypothetical protein SFRURICE_007232 [Spodoptera frugiperda]	79.7	_	_	_	_	_	_	_	_	_	_	_	_	_	_	_	m.669|TRINITY_DN10357_c0_g1:553-1359(+)	complete	_
TRINITY_DN10358_c0_g1	0	0.365058	0.196141	0	0.540979	0	859	KPI99433.1	KPI99433.1 hypothetical protein RR46_03798 [Papilio xuthus]	62.7	_	_	_	_	_	_	_	_	_	_	_	_	_	_	_	_	_	_
TRINITY_DN10359_c0_g1	0.472324	0.080816	0	0.544476	0.651208	0.503102	571	QEL53109.1	QEL53109.1 cytochrome P450 CYP137, partial [Mythimna separata]	89.4	sp|Q9VA27|CP4C3_DROME	sp|Q9VA27|CP4C3_DROME Cytochrome P450 4c3 OS=Drosophila melanogaster OX=7227 GN=Cyp4c3 PE=2 SV=1	55	_	_	_	_	_	_		GO:0005789|endoplasmic reticulum membrane	GO:0004497|monooxygenase activity;GO:0005506|iron ion binding;GO:0016705|oxidoreductase activity, acting on paired donors, with incorporation or reduction of molecular oxygen;GO:0020037|heme binding	ko:K07427	CYP4V		m.677|TRINITY_DN10359_c0_g1:3-569(+)	internal	PF00067.19|p450|Cytochrome P450|TRINITY_DN10359_c0_g1_i1|m.677:2-179
TRINITY_DN1035_c0_g1	0.520907	0.07872	0.1152	0	1.22308	0.091813	9061	XP_035450067.1	XP_035450067.1 protein TANC2-like isoform X3 [Spodoptera frugiperda]	98.8	_	_	_	_	_	_	_	_	_	_	_	_	_	_	_	m.721|TRINITY_DN1035_c0_g1:308-4555(+)	complete	PF12796.4|Ank_2|Ankyrin repeats (3 copies)|TRINITY_DN1035_c0_g1_i1|m.721:902-979;PF12796.4|Ank_2|Ankyrin repeats (3 copies)|TRINITY_DN1035_c0_g1_i1|m.721:1003-1062;PF12796.4|Ank_2|Ankyrin repeats (3 copies)|TRINITY_DN1035_c0_g1_i1|m.721:1058-1130;PF13637.3|Ank_4|Ankyrin repeats (many copies)|TRINITY_DN1035_c0_g1_i1|m.721:895-944;PF13637.3|Ank_4|Ankyrin repeats (many copies)|TRINITY_DN1035_c0_g1_i…
TRINITY_DN1035_c1_g1	0	0.894115	0.643826	0	0.179762	0	404	_	_	_	_	_	_	_	_	_	_	_	_	_	_	_	_	_	_	_	_	_
TRINITY_DN1035_c1_g2	0.374492	0.308872	0.926684	0	0	0.163048	426	_	_	_	_	_	_	_	_	_	_	_	_	_	_	_	_	_	_	_	_	_
TRINITY_DN1035_c1_g3	0	0	0.207257	0.652832	0	0.363716	409	_	_	_	_	_	_	_	_	_	_	_	_	_	_	_	_	_	_	_	_	_
TRINITY_DN1035_c2_g1	0	0	0.105279	0.60025	0.267246	0.091933	545	_	_	_	_	_	_	_	_	_	_	_	_	_	_	_	_	_	_	_	_	_
TRINITY_DN1035_c3_g1	0	2.35442	1.01286	1.24097	0	0	205	_	_	_	_	_	_	_	_	_	_	_	_	_	_	_	_	_	_	_	_	_
TRINITY_DN10360_c0_g1	0	0.738941	0	0.576814	0	0	852	_	_	_	_	_	_	_	_	_	_	_	_	_	_	_	_	_	_	_	_	_
TRINITY_DN10360_c0_g2	4.30991	0	3.84819	0	0	3.72519	296	_	_	_	_	_	_	_	_	_	_	_	_	_	_	_	_	_	_	_	_	_
TRINITY_DN10360_c0_g3	0.651407	1.08043	0.428215	0	0.057289	0	1550	CAD7471285.1	CAD7471285.1 unnamed protein product [Plutella xylostella]	61.3	_	_	_	_	_	_	_	_	_	_	_	_	_	_	_	_	_	_
TRINITY_DN10360_c0_g4	0	0.077913	0	0.188489	0	0	1163	_	_	_	_	_	_	_	_	_	_	_	_	_	_	_	_	_	_	_	_	_
TRINITY_DN10360_c1_g1	0	2.35968	0	2.34692	0	0	326	_	_	_	_	_	_	_	_	_	_	_	_	_	_	_	_	_	_	_	_	_
TRINITY_DN10360_c2_g1	0	0.415213	0	0.376356	0.415353	0	384	_	_	_	_	_	_	_	_	_	_	_	_	_	_	_	_	_	_	_	_	_
TRINITY_DN10360_c3_g1	0	0	0	0	0	0	201	_	_	_	_	_	_	_	_	_	_	_	_	_	_	_	_	_	_	_	_	_
TRINITY_DN10361_c0_g1	0.254072	0	0	0.315072	0.399909	0.070555	1679	_	_	_	_	_	_	_	_	_	_	_	_	_	_	_	_	_	_	_	_	_
TRINITY_DN10361_c0_g2	0.045512	0.408581	0	0.161031	0.120151	0	882	_	_	_	_	_	_	_	_	_	_	_	_	_	_	_	_	_	_	_	_	_
TRINITY_DN10362_c0_g1	0	0.16559	0.032342	0	0	0	4027	_	_	_	_	_	_	_	_	_	_	_	_	_	_	_	_	_	_	_	_	_
TRINITY_DN10362_c1_g1	0	0.132244	0	0	0.117507	0	484	_	_	_	_	_	_	_	_	_	_	_	_	_	_	_	_	_	_	_	_	_
TRINITY_DN10363_c0_g1	0.243215	0.178034	0.288978	0.267286	0.121925	0.094416	1074	_	_	_	_	_	_	_	_	_	_	_	_	_	_	_	_	_	_	_	_	_
TRINITY_DN10363_c1_g1	0	0.557491	0	0.292909	0	0	486	_	_	_	_	_	_	_	_	_	_	_	_	_	_	_	_	_	_	_	_	_
TRINITY_DN10364_c0_g1	0	1.24103	0	1.13207	0	0.726417	542	_	_	_	_	_	_	_	_	_	_	_	_	_	_	_	_	_	_	_	_	_
TRINITY_DN10364_c0_g2	0	0.486727	0	0.361426	0	0.35354	1396	XP_026742114.1	XP_026742114.1 uncharacterized protein LOC113504151 [Trichoplusia ni]	86.3	_	_	_	_	_	_	_	_	_	_	_	_	_	_	_	m.712|TRINITY_DN10364_c0_g2:188-592(+)	complete	PF05517.9|p25-alpha|p25-alpha|TRINITY_DN10364_c0_g2_i1|m.712:11-100
TRINITY_DN10365_c0_g1	0.192729	0.259111	0.122394	0.09012	0.192191	0.115913	1557	_	_	_	_	_	_	_	_	_	_	_	_	_	_	_	_	_	_	_	_	_
TRINITY_DN10365_c1_g1	0	0	0	0	0	1.29165	211	_	_	_	_	_	_	_	_	_	_	_	_	_	_	_	_	_	_	_	_	_
TRINITY_DN10365_c1_g2	6.06228	8.30221	0.426772	26.3236	1132.18	53.3233	349	XP_026483812.1	XP_026483812.1 uncharacterized protein LOC113391898 [Vanessa tameamea]	77.4	_	_	_	_	_	_	_	_	_	_	_	_	_	_	_	_	_	_
TRINITY_DN10365_c1_g3	0.803498	1.13302	0.426576	0.50514	119.936	0.81531	1217	_	_	_	_	_	_	_	_	_	_	_	_	_	_	_	_	_	_	_	_	_
TRINITY_DN10365_c1_g4	0.770518	0.969248	0.519214	0.449071	1.3815	0.723597	1086	_	_	_	_	_	_	_	_	_	_	_	_	_	_	_	_	_	_	_	_	_
TRINITY_DN10366_c0_g1	0.273529	0.117282	0.047266	0.129044	0.641854	0.288777	881	_	_	_	_	_	_	_	_	_	_	_	_	_	_	_	_	_	_	_	_	_
TRINITY_DN10367_c0_g1	0	0	19.2569	0	34.6749	146.529	339	_	_	_	_	_	_	_	_	_	_	_	_	_	_	_	_	_	_	_	_	_
TRINITY_DN10367_c0_g2	2.16323	8.43775	15.7082	10.4474	16.2736	37.9612	554	_	_	_	_	_	_	_	_	_	_	_	_	_	_	_	_	_	_	_	_	_
TRINITY_DN10367_c1_g1	0.05528	0	0	0.468302	0	0.183477	820	_	_	_	_	_	_	_	_	_	_	_	_	_	_	_	_	_	_	_	_	_
TRINITY_DN10367_c2_g1	3.45021	0	0	0	0.609927	3.27909	237	_	_	_	_	_	_	_	_	_	_	_	_	_	_	_	_	_	_	_	_	_
TRINITY_DN10367_c3_g1	0	2.65224	0	1.49648	0	0	234	_	_	_	_	_	_	_	_	_	_	_	_	_	_	_	_	_	_	_	_	_
TRINITY_DN10367_c4_g1	0	0.111498	0	0.097636	0	0.470352	486	_	_	_	_	_	_	_	_	_	_	_	_	_	_	_	_	_	_	_	_	_
TRINITY_DN10368_c0_g1	0.168217	0.042437	0	0	0.068724	0.063439	2515	XP_022822669.1	XP_022822669.1 5-methylcytosine rRNA methyltransferase NSUN4 [Spodoptera litura]	91.8	_	_	_	_	_	_	_	_	_	_	_	_	_	_	_	m.747|TRINITY_DN10368_c0_g1:236-1633(+)	complete	PF01189.14|Methyltr_RsmB-F|16S rRNA methyltransferase RsmB/F|TRINITY_DN10368_c0_g1_i3|m.747:292-456
TRINITY_DN10368_c0_g2	0.416433	0.325486	0.368122	0.270378	0.579108	0.226783	741	_	_	_	_	_	_	_	_	_	_	_	_	_	_	_	_	_	_	_	_	_
TRINITY_DN10368_c1_g1	0.235568	0.066574	0	0.240732	0.13616	0.069895	630	_	_	_	_	_	_	_	_	_	_	_	_	_	_	_	_	_	_	_	_	_
TRINITY_DN10369_c0_g1	0	0	0.190635	0.141899	0.222311	0.225873	1043	_	_	_	_	_	_	_	_	_	_	_	_	_	_	_	_	_	_	_	_	_
TRINITY_DN1036_c0_g1	4.88091	4.6304	4.69774	1.54449	3.196	1.17585	2591	_	_	_	_	_	_	_	_	_	_	_	_	_	_	_	_	_	_	_	_	_
TRINITY_DN10370_c0_g1	7.65599	9.7974	4.93768	4.36718	6.95665	3.63624	452	_	_	_	_	_	_	_	_	_	_	_	_	_	_	_	_	_	_	_	_	_
TRINITY_DN10370_c2_g1	0.858468	0	0	0	0	0	203	_	_	_	_	_	_	_	_	_	_	_	_	_	_	_	_	_	_	_	_	_
TRINITY_DN10370_c3_g1	0.633241	0	0	0	0	0	259	_	_	_	_	_	_	_	_	_	_	_	_	_	_	_	_	_	_	_	_	_
TRINITY_DN10371_c0_g1	39.558	34.4581	39.603	22.3914	51.0988	13.0358	1852	_	_	_	_	_	_	_	_	_	_	_	_	_	_	_	_	_	_	_	_	_
TRINITY_DN10371_c1_g1	3.02722	0	4.1905	0	0	1.2832	362	_	_	_	_	_	_	_	_	_	_	_	_	_	_	_	_	_	_	_	_	_
TRINITY_DN10371_c1_g2	0	0	0	1.62663	2.64168	0	354	_	_	_	_	_	_	_	_	_	_	_	_	_	_	_	_	_	_	_	_	_
TRINITY_DN10371_c1_g3	0	0	0	0.757283	0.444344	0	573	_	_	_	_	_	_	_	_	_	_	_	_	_	_	_	_	_	_	_	_	_
TRINITY_DN10371_c1_g4	0.559842	1.48931	0	0.864763	1.42431	1.65741	282	_	_	_	_	_	_	_	_	_	_	_	_	_	_	_	_	_	_	_	_	_
TRINITY_DN10371_c2_g1	0	0.185353	0.222459	0.18266	0.744538	0	399	_	_	_	_	_	_	_	_	_	_	_	_	_	_	_	_	_	_	_	_	_
TRINITY_DN10371_c3_g1	1.45818	3.74096	2.01266	0	1.40584	0	206	_	_	_	_	_	_	_	_	_	_	_	_	_	_	_	_	_	_	_	_	_
TRINITY_DN10371_c4_g1	0	0	0	0.907821	0	0	250	_	_	_	_	_	_	_	_	_	_	_	_	_	_	_	_	_	_	_	_	_
TRINITY_DN10372_c0_g1	0.403558	0.472316	0.258863	0.145174	0.567211	0.18765	2386	_	_	_	_	_	_	_	_	_	_	_	_	_	_	_	_	_	_	m.767|TRINITY_DN10372_c0_g1:809-1852(+)	complete	_
TRINITY_DN10373_c0_g1	0.031821	0.46837	0	0.321906	0.028352	0.502982	1998	XP_021192575.1	XP_021192575.1 organic cation transporter protein-like isoform X1 [Helicoverpa armigera]	80.8	_	_	_	_	_	_	_	_	_	_	_	_	_	_	_	m.689|TRINITY_DN10373_c0_g1:66-1724(+)	complete	PF00083.21|Sugar_tr|Sugar (and other) transporter|TRINITY_DN10373_c0_g1_i1|m.689:128-486;PF07690.13|MFS_1|Major Facilitator Superfamily|TRINITY_DN10373_c0_g1_i1|m.689:142-487
TRINITY_DN10374_c0_g1	0	1.19591	0	2.19863	0	1.56628	750	_	_	_	_	_	_	_	_	_	_	_	_	_	_	_	_	_	_	_	_	_
TRINITY_DN10375_c0_g1	0	0	0	3.64448	3.03891	0.727264	519	KAF9811689.1	KAF9811689.1 hypothetical protein SFRURICE_011052 [Spodoptera frugiperda]	53.5	_	_	_	_	_	_	_	_	_	_	_	_	_	_	_	_	_	_
TRINITY_DN10376_c0_g1	0	0.663024	0	0	0	0	805	PCG75862.1	PCG75862.1 hypothetical protein B5V51_10833 [Heliothis virescens]	88.8	_	_	_	_	_	_	_	_	_	_	_	_	ko:K00814	GPT, ALT	path:ko00220;path:ko00250;path:ko00710;path:ko01100;path:ko01120;path:ko01200;path:ko01210;path:ko01230	m.713|TRINITY_DN10376_c0_g1:487-804(+)	3prime_partial	_
TRINITY_DN10377_c0_g1	0	0	0	18.7607	0	11.6991	245	_	_	_	_	_	_	_	_	_	_	_	_	_	_	_	_	_	_	_	_	_
TRINITY_DN10378_c0_g1	0.917559	0.656713	0.526762	0.191382	0.163502	0	490	_	_	_	_	_	_	_	_	_	_	_	_	_	_	_	_	_	_	_	_	_
TRINITY_DN10378_c0_g2	0.043691	0.142498	0.100538	0.126784	0.230868	0.078446	907	_	_	_	_	_	_	_	_	_	_	_	_	_	_	_	_	_	_	_	_	_
TRINITY_DN10378_c1_g1	0.321245	0	0	1.25549	0	0.71526	707	_	_	_	_	_	_	_	_	_	_	_	_	_	_	_	_	_	_	_	_	_
TRINITY_DN10378_c2_g1	0.204351	0	0.40335	0	0	0	413	KAF9414123.1	KAF9414123.1 hypothetical protein HW555_007882 [Spodoptera exigua]	95.1	_	_	_	_	_	_	_	_	_	_	_	_	_	_	_	_	_	_
TRINITY_DN10379_c0_g1	0	0	0	0.079884	0	0	1252	XP_021190406.1	XP_021190406.1 cactin [Helicoverpa armigera]	78.6	sp|Q9VR99|CATIN_DROME	sp|Q9VR99|CATIN_DROME Cactin OS=Drosophila melanogaster OX=7227 GN=cactin PE=1 SV=3	65.3	_	_	_	_	_	_	GO:0000398|mRNA splicing, via spliceosome;GO:0009950|dorsal/ventral axis specification;GO:0010468|regulation of gene expression;GO:0045292|mRNA cis splicing, via spliceosome;GO:0045752|positive regulation of Toll signaling pathway	GO:0005681|spliceosomal complex;GO:0005737|cytoplasm;GO:0071013|catalytic step 2 spliceosome	GO:0003723|RNA binding	_	_	_	m.625|TRINITY_DN10379_c0_g1:72-626(+);m.626|TRINITY_DN10379_c0_g1:838-1149(+)	complete;complete	PF10312.6|Cactin_mid|Conserved mid region of cactin|TRINITY_DN10379_c0_g1_i1|m.625:110-176;PF10312.6|Cactin_mid|Conserved mid region of cactin|TRINITY_DN10379_c0_g1_i1|m.626:4-97
TRINITY_DN1037_c0_g1	19.276	27.8966	17.5779	24.4857	16.8237	36.3063	3874	_	_	_	_	_	_	_	_	_	_	_	_	_	_	_	_	_	_	_	_	_
TRINITY_DN1037_c0_g2	0	0	0	137.512	125.189	290.595	291	_	_	_	_	_	_	_	_	_	_	_	_	_	_	_	_	_	_	_	_	_
TRINITY_DN10380_c0_g1	1.55681	0	0.93349	0.19781	0	0	580	XP_021181562.1	XP_021181562.1 integral membrane protein GPR155 isoform X2 [Helicoverpa armigera]	97.4	_	_	_	_	_	_	_	_	_	_	_	_	_	_	_	m.738|TRINITY_DN10380_c0_g1:1-579(+)	internal	PF03547.15|Mem_trans|Membrane transport protein|TRINITY_DN10380_c0_g1_i3|m.738:2-119
TRINITY_DN10381_c0_g1	0.358112	0	0.177517	0.398441	0	0	433	XP_021191496.1	XP_021191496.1 uncharacterized protein LOC110377118 [Helicoverpa armigera]	68.2	_	_	_	_	_	_	_	_	_	_	_	_	_	_	_	_	_	_
TRINITY_DN10381_c0_g2	0.122355	0.151261	0.128354	0.587199	0.108979	0	1844	QEL53090.1	QEL53090.1 cytochrome P450 CYP121 [Mythimna separata]	100	_	_	_	_	_	_	_	_	_	_	_	_	_	_	_	_	_	_
TRINITY_DN10381_c1_g1	2.42347	2.24795	0	0	0	2.5656	212	_	_	_	_	_	_	_	_	_	_	_	_	_	_	_	_	_	_	_	_	_
TRINITY_DN10381_c2_g1	0.201552	0.165763	0	0.598535	0	0	415	_	_	_	_	_	_	_	_	_	_	_	_	_	_	_	_	_	_	_	_	_
TRINITY_DN10381_c3_g1	0.181327	0	0.539067	0	0	0	431	_	_	_	_	_	_	_	_	_	_	_	_	_	_	_	_	_	_	m.758|TRINITY_DN10381_c3_g1:1-363(+)	5prime_partial	_
TRINITY_DN10382_c0_g1	12.8217	10.1656	1.72142	0.459242	0	0	248	XP_035453561.1	XP_035453561.1 spectrin alpha chain, non-erythrocytic 1-like isoform X4 [Spodoptera frugiperda]	91.5	_	_	_	_	_	_	_	_	_	_	_	_	ko:K06115	SPTB		_	_	_
TRINITY_DN10383_c0_g1	0	0.430838	0	1.0344	0	0	300	_	_	_	_	_	_	_	_	_	_	_	_	_	_	_	_	_	_	_	_	_
TRINITY_DN10383_c1_g1	0.544012	1.79556	1.36149	0.405439	0.755883	0.315945	431	_	_	_	_	_	_	_	_	_	_	_	_	_	_	_	_	_	_	_	_	_
TRINITY_DN10384_c0_g1	0.819075	0	0.572418	0	0	0	1882	_	_	_	_	_	_	_	_	_	_	_	_	_	_	_	_	_	_	_	_	_
TRINITY_DN10384_c0_g2	2.4221	0	0	0	0	0	212	_	_	_	_	_	_	_	_	_	_	_	_	_	_	_	_	_	_	_	_	_
TRINITY_DN10384_c1_g1	0	0.639043	0	0.47814	0	0	241	_	_	_	_	_	_	_	_	_	_	_	_	_	_	_	_	_	_	_	_	_
TRINITY_DN10385_c0_g1	0.905658	0	1.20843	0	0	0	1453	_	_	_	_	_	_	_	_	_	_	_	_	_	_	_	_	_	_	_	_	_
TRINITY_DN10386_c0_g1	1.0521	1.34473	1.19725	0.554469	1.95724	0.490832	1234	_	_	_	_	_	_	_	_	_	_	_	_	_	_	_	_	_	_	_	_	_
TRINITY_DN10386_c0_g2	0	0	0	0	0.496769	0	275	_	_	_	_	_	_	_	_	_	_	_	_	_	_	_	_	_	_	_	_	_
TRINITY_DN10387_c0_g1	0.544948	0.104065	0.179613	0.673996	0	0.231605	1234	KOB76123.1	KOB76123.1 Inwardly rectifying k+ channel [Operophtera brumata]	75	_	_	_	_	_	_	_	_	_	_	_	_	ko:K05330	KCNJN		_	_	_
TRINITY_DN10387_c1_g1	0	0.500126	0	0	2.39217	1.34909	281	_	_	_	_	_	_	_	_	_	_	_	_	_	_	_	_	_	_	_	_	_
TRINITY_DN10387_c1_g2	0.356624	0.688179	0.632556	0.144494	0.353702	0.045661	818	_	_	_	_	_	_	_	_	_	_	_	_	_	_	_	_	_	_	_	_	_
TRINITY_DN10387_c2_g1	0.997081	0.846493	0.235766	0.109798	1.76631	0.89449	638	_	_	_	_	_	_	_	_	_	_	_	_	_	_	_	_	_	_	_	_	_
TRINITY_DN10387_c2_g2	0.634264	0	0.255238	0	0	0.894296	497	_	_	_	_	_	_	_	_	_	_	_	_	_	_	_	_	_	_	_	_	_
TRINITY_DN10387_c3_g1	0.197467	0.162499	0	0.146534	0	0	418	_	_	_	_	_	_	_	_	_	_	_	_	_	_	_	_	_	_	_	_	_
TRINITY_DN10387_c4_g1	0	0	0.115396	0.331426	0.09758	0	521	_	_	_	_	_	_	_	_	_	_	_	_	_	_	_	_	_	_	_	_	_
TRINITY_DN10387_c5_g1	1.60567	1.4891	0	0	0	0	213	_	_	_	_	_	_	_	_	_	_	_	_	_	_	_	_	_	_	_	_	_
TRINITY_DN10388_c0_g1	0.921101	0.277996	0.783903	0.307698	0.142499	0.145588	786	_	_	_	_	_	_	_	_	_	_	_	_	_	_	_	_	_	_	_	_	_
TRINITY_DN10389_c0_g1	5.90441	0	0	14.9483	0	5.73837	388	_	_	_	_	_	_	_	_	_	_	_	_	_	_	_	_	_	_	_	_	_
TRINITY_DN1038_c0_g1	8.21981	8.04352	9.13394	1.1421	3.89332	0.743408	1508	_	_	_	_	_	_	_	_	_	_	_	_	_	_	_	_	_	_	_	_	_
TRINITY_DN1038_c1_g1	0.158447	0	0	0	0	0	1272	ADZ95869.1	ADZ95869.1 reverse transcriptase, partial [Coenonympha glycerion]	86.8	_	_	_	_	_	_	_	_	_	_	_	_	_	_	_	_	_	_
TRINITY_DN1038_c2_g1	1.46916	1.22136	0.928717	1.08922	0.406351	0.377065	2408	KDR19064.1	KDR19064.1 hypothetical protein L798_06420 [Zootermopsis nevadensis]	66.7	_	_	_	_	_	_	_	_	_	_	_	_	_	_	_	_	_	_
TRINITY_DN1038_c2_g2	2.72589	2.65992	1.03795	1.21398	2.96173	2.25912	1021	_	_	_	_	_	_	_	_	_	_	_	_	_	_	_	_	_	_	_	_	_
TRINITY_DN1038_c3_g1	1.4946	2.57725	1.13976	1.69802	1.45978	1.03965	1232	KAF9409186.1	KAF9409186.1 hypothetical protein HW555_011371 [Spodoptera exigua]	92.5	_	_	_	_	_	_	_	_	_	_	_	_	ko:K07541	PIGX	path:ko00563;path:ko01100	m.746|TRINITY_DN1038_c3_g1:222-992(+)	complete	PF08320.9|PIG-X|PIG-X / PBN1|TRINITY_DN1038_c3_g1_i2|m.746:42-235
TRINITY_DN1038_c4_g1	3.12774	1.35047	2.25998	2.46073	4.51438	2.32095	343	_	_	_	_	_	_	_	_	_	_	_	_	_	_	_	_	_	_	_	_	_
TRINITY_DN1038_c4_g2	1.3813	1.19153	0	3.15877	0	0	202	_	_	_	_	_	_	_	_	_	_	_	_	_	_	_	_	_	_	_	_	_
TRINITY_DN1038_c5_g1	0	1.11234	0	0	0	0	202	_	_	_	_	_	_	_	_	_	_	_	_	_	_	_	_	_	_	_	_	_
TRINITY_DN10390_c0_g1	0.148207	0.31307	0.111492	0	0.155439	0	833	PCG68424.1	PCG68424.1 hypothetical protein B5V51_5265, partial [Heliothis virescens]	77.6	_	_	_				_	_	NOG228876	_	_	_	_	_	_	m.632|TRINITY_DN10390_c0_g1:251-832(+)	3prime_partial	_
TRINITY_DN10390_c0_g2	0.704897	1.30594	0.838924	0.49037	0	0.55342	237	KAF9806002.1	KAF9806002.1 hypothetical protein SFRURICE_017505 [Spodoptera frugiperda]	84.4	_	_	_	_	_	_	_	_	_	_	_	_	_	_	_	_	_	_
TRINITY_DN10391_c0_g1	0.176489	0.634068	0.733755	0.607893	1.01651	0.469904	1325	_	_	_	_	_	_	_	_	_	_	_	_	_	_	_	_	_	_	_	_	_
TRINITY_DN10391_c1_g1	0.119859	0.082804	0.050124	0.180433	0.191578	0.064841	1421	XP_028164204.1	XP_028164204.1 uncharacterized protein LOC114355521 isoform X1 [Ostrinia furnacalis]	54.8	_	_	_	_	_	_	_	_	_	_	_	_	_	_	_	m.639|TRINITY_DN10391_c1_g1:1090-1419(+)	3prime_partial	_
TRINITY_DN10391_c2_g1	4.31703	0.57354	0	3.22391	0.56959	0	346	_	_	_	_	_	_	_	_	_	_	_	_	_	_	_	_	_	_	_	_	_
TRINITY_DN10392_c0_g1	0	6.63896	1.92046	0	5.84882	0	278	XP_021201364.1	XP_021201364.1 facilitated trehalose transporter Tret1-2 homolog [Helicoverpa armigera]	98.9	sp|A9ZSY2|TRET1_APILI	sp|A9ZSY2|TRET1_APILI Facilitated trehalose transporter Tret1 OS=Apis mellifera ligustica OX=7469 GN=Tret1 PE=1 SV=1	71	_	_	_	_	_	_	GO:0015771|trehalose transport	GO:0005886|plasma membrane;GO:0016021|integral component of membrane	GO:0015574|trehalose transmembrane transporter activity	ko:K14258	TRET1		_	_	_
TRINITY_DN10393_c0_g1	0.827273	0.567294	0.332981	0	0	0.621974	446	KAF9799532.1	KAF9799532.1 hypothetical protein SFRURICE_018719 [Spodoptera frugiperda]	82.7	_	_	_	_	_	_	_	_	_	_	_	_	ko:K05719	ITGB1, CD29	path:ko04015;path:ko04145;path:ko04151;path:ko04360;path:ko04510;path:ko04512;path:ko04514;path:ko04530;path:ko04611;path:ko04670;path:ko04810;path:ko05100;path:ko05130;path:ko05131;path:ko05133;path:ko05140;path:ko05145;path:ko05200;path:ko05205;path:ko05222;path:ko05410;path:ko05412;path:ko05414	m.638|TRINITY_DN10393_c0_g1:3-386(+)	5prime_partial	_
TRINITY_DN10394_c0_g1	0	3.99447	0	1.81091	0	0	389	_	_	_	_	_	_	_	_	_	_	_	_	_	_	_	_	_	_	_	_	_
TRINITY_DN10395_c0_g1	1.25607	1.46054	0	0	0.982451	1.74364	1227	_	_	_	_	_	_	_	_	_	_	_	_	_	_	_	_	_	_	_	_	_
TRINITY_DN10396_c0_g1	0.04938	0.042294	0.204492	0.174965	0.043381	0.088546	835	_	_	_	_	_	_	_	_	_	_	_	_	_	_	_	_	_	_	_	_	_
TRINITY_DN10396_c0_g2	0	0.117663	0	0.098687	0	0.308547	677	_	_	_	_	_	_	_	_	_	_	_	_	_	_	_	_	_	_	_	_	_
TRINITY_DN10397_c0_g1	1.11356	0.121713	1.22468	0.878732	1.2427	0.255862	486	_	_	_	_	_	_	_	_	_	_	_	_	_	_	_	_	_	_	_	_	_
TRINITY_DN10397_c0_g2	4.32448	1.49545	2.85178	1.29651	1.7098	0.948273	2816	AIN34708.1	AIN34708.1 fatty alcohol acetyltransferase [Agrotis segetum]	96	_	_	_	_	_	_	_	_	_	_	_	_	ko:K08766	CPT2	path:ko00071;path:ko01212;path:ko03320	m.679|TRINITY_DN10397_c0_g2:150-2111(+)	complete	PF00755.17|Carn_acyltransf|Choline/Carnitine o-acyltransferase|TRINITY_DN10397_c0_g2_i2|m.679:51-647
TRINITY_DN10398_c0_g1	0.545617	0.424079	0.500728	0	1.05863	0	1483	XP_035457508.1	XP_035457508.1 uncharacterized protein LOC118281131 [Spodoptera frugiperda]	91.1	_	_	_	_	_	_	_	_	_	_	_	_	_	_	_	m.744|TRINITY_DN10398_c0_g1:153-1148(+)	complete	_
TRINITY_DN10399_c0_g1	0.488882	0.406701	0	0.625965	0.836886	0.599113	565	_	_	_	_	_	_	_	_	_	_	_	_	_	_	_	_	_	_	_	_	_
TRINITY_DN1039_c0_g1	3.69863	4.14635	0	4.87938	0	3.14421	836	_	_	_	_	_	_	_	_	_	_	_	_	_	_	_	_	_	_	_	_	_
TRINITY_DN1039_c0_g2	8.06363	7.03536	7.78417	7.95646	6.99303	4.58111	1678	_	_	_	_	_	_	_	_	_	_	_	_	_	_	_	_	_	_	_	_	_
TRINITY_DN1039_c10_g1	0	0	5.25526	0	14.5099	0	215	_	_	_	_	_	_	_	_	_	_	_	_	_	_	_	_	_	_	_	_	_
TRINITY_DN1039_c10_g2	34.7407	39.6008	0	30.611	0	0.905562	212	_	_	_	_	_	_	_	_	_	_	_	_	_	_	_	_	_	_	_	_	_
TRINITY_DN1039_c12_g1	0	0	0	0	0.925573	0	307	_	_	_	_	_	_	_	_	_	_	_	_	_	_	_	_	_	_	_	_	_
TRINITY_DN1039_c14_g1	1.5407	0.798848	0.872936	0.146715	3.11248	0.285285	2623	_	_	_	_	_	_	_	_	_	_	_	_	_	_	_	_	_	_	_	_	_
TRINITY_DN1039_c15_g1	0	56.1578	49.1583	40.0197	16.5437	0.605252	221	_	_	_	_	_	_	_	_	_	_	_	_	_	_	_	_	_	_	_	_	_
TRINITY_DN1039_c16_g1	137.97	135.81	217.478	81.9845	363.525	134.18	251	_	_	_	_	_	_	_	_	_	_	_	_	_	_	_	_	_	_	_	_	_
TRINITY_DN1039_c17_g1	0	1.84283	0.24927	3.17604	1.24475	1.82275	384	_	_	_	_	_	_	_	_	_	_	_	_	_	_	_	_	_	_	_	_	_
TRINITY_DN1039_c18_g1	0	0	0	0	0.697473	0	202	_	_	_	_	_	_	_	_	_	_	_	_	_	_	_	_	_	_	_	_	_
TRINITY_DN1039_c19_g1	0	1.29277	0	0	1.19548	0	241	XP_022814755.1	XP_022814755.1 leucine-rich repeat-containing protein 40-like [Spodoptera litura]	96	_	_	_	_	_	_	_	_	_	_	_	_	_	_	_	_	_	_
TRINITY_DN1039_c1_g1	1.87082	1.19391	0.969103	1.25611	1.11846	0	1068	_	_	_	_	_	_	_	_	_	_	_	_	_	_	_	_	_	_	_	_	_
TRINITY_DN1039_c2_g1	8.80508	7.49452	4.49176	7.49123	5.74254	3.73839	367	_	_	_	_	_	_	_	_	_	_	_	_	_	_	_	_	_	_	_	_	_
TRINITY_DN1039_c3_g1	0.624352	2.0478	2.12525	0.507821	3.46897	0.065984	651	_	_	_	_	_	_	_	_	_	_	_	_	_	_	_	_	_	_	_	_	_
TRINITY_DN1039_c3_g2	11.042	10.5447	12.0516	4.1643	8.27643	5.48839	604	_	_	_	_	_	_	_	_	_	_	_	_	_	_	_	_	_	_	_	_	_
TRINITY_DN1039_c4_g1	4.07327	3.77327	2.96842	1.68097	3.46823	1.116	747	_	_	_	_	_	_	_	_	_	_	_	_	_	_	_	_	_	_	_	_	_
TRINITY_DN1039_c5_g1	0.745311	0.690703	0	0.458169	0.351188	0.207502	1177	_	_	_	_	_	_	_	_	_	_	_	_	_	_	_	_	_	_	_	_	_
TRINITY_DN1039_c6_g1	1.72505	1.26497	1.32625	0.476494	4.60754	0.616835	3714	_	_	_	_	_	_	_	_	_	_	_	_	_	_	_	_	_	_	_	_	_
TRINITY_DN1039_c7_g1	2.44982	2.09349	1.32207	1.76349	2.28043	1.2166	897	PZC81710.1	PZC81710.1 hypothetical protein B5X24_HaOG212154 [Helicoverpa armigera]	69.8	_	_	_	_	_	_	_	_	_	_	_	_	_	_	_	_	_	_
TRINITY_DN1039_c8_g1	3.02743	1.407	0.907464	2.11778	1.25107	1.19591	223	_	_	_	_	_	_	_	_	_	_	_	_	_	_	_	_	_	_	_	_	_
TRINITY_DN1039_c9_g1	2.44177	0	0	1.16237	0.350483	0.352265	321	_	_	_	_	_	_	_	_	_	_	_	_	_	_	_	_	_	_	_	_	_
TRINITY_DN103_c0_g1	23.351	30.6223	22.4287	32.3791	20.3232	27.662	530	_	_	_	_	_	_	_	_	_	_	_	_	_	_	_	_	_	_	_	_	_
TRINITY_DN10400_c0_g1	38.7001	22.4597	15.9894	16.181	5.27493	6.87546	329	_	_	_	_	_	_	_	_	_	_	_	_	_	_	_	_	_	_	_	_	_
TRINITY_DN10400_c0_g2	2.83399	1.64631	0.824312	0.131506	0.632537	0.341447	735	_	_	_	_	_	_	_	_	_	_	_	_	_	_	_	_	_	_	_	_	_
TRINITY_DN10400_c0_g3	0.712128	3.29874	2.54609	0.501433	1.84794	1.11777	235	_	_	_	_	_	_	_	_	_	_	_	_	_	_	_	_	_	_	_	_	_
TRINITY_DN10400_c0_g4	20.3823	15.1965	12.6174	6.62372	10.88	8.63549	612	_	_	_	_	_	_	_	_	_	_	_	_	_	_	_	_	_	_	_	_	_
TRINITY_DN10401_c0_g1	2.18942	0.818601	3.01261	0.665661	0.397081	1.55582	306	_	_	_	_	_	_	_	_	_	_	_	_	_	_	_	_	_	_	_	_	_
TRINITY_DN10401_c1_g1	0.161762	0.19504	0.067429	0.136701	0.200396	0	1126	_	_	_	_	_	_	_	_	_	_	_	_	_	_	_	_	_	_	_	_	_
TRINITY_DN10402_c0_g1	32.1564	0	29.6388	15.7943	17.7417	31.6659	205	_	_	_	_	_	_	_	_	_	_	_	_	_	_	_	_	_	_	_	_	_
TRINITY_DN10403_c0_g1	0.770974	0	0	0	0.334494	0	2240	_	_	_	_	_	_	_	_	_	_	_	_	_	_	_	_	_	_	_	_	_
TRINITY_DN10404_c0_g1	0	0	0	2.84052	0	1.21993	299	PCG77638.1	PCG77638.1 hypothetical protein B5V51_6772 [Heliothis virescens]	84.6	_	_	_	_	_	_	_	_	_	_	_	_	_	_	_	_	_	_
TRINITY_DN10405_c0_g1	0.56386	0	0.144563	0.050257	0.245108	0	670	_	_	_	_	_	_	_	_	_	_	_	_	_	_	_	_	_	_	_	_	_
TRINITY_DN10406_c0_g1	0.637157	0.410117	1.583	0	0	0.139072	453	_	_	_	_	_	_	_	_	_	_	_	_	_	_	_	_	_	_	_	_	_
TRINITY_DN10406_c0_g2	0	0.028281	0.063723	0	0	0	1539	_	_	_	_	_	_	_	_	_	_	_	_	_	_	_	_	_	_	_	_	_
TRINITY_DN10406_c1_g1	0.875842	1.4476	0.755708	0	0	0.331192	500	_	_	_	_	_	_	_	_	_	_	_	_	_	_	_	_	_	_	_	_	_
TRINITY_DN10406_c2_g1	0.24326	0.15569	0.125377	0.259664	0.053171	0.162822	731	_	_	_	_	_	_	_	_	_	_	_	_	_	_	_	_	_	_	_	_	_
TRINITY_DN10406_c2_g2	0.240214	0.280287	0.327759	0.286916	0	0.142615	623	_	_	_	_	_	_	_	_	_	_	_	_	_	_	_	_	_	_	_	_	_
TRINITY_DN10406_c3_g1	1.574	0	0	0	0	0	216	_	_	_	_	_	_	_	_	_	_	_	_	_	_	_	_	_	_	_	_	_
TRINITY_DN10406_c4_g1	0	0.780697	0	0	0	0	205	_	_	_	_	_	_	_	_	_	_	_	_	_	_	_	_	_	_	_	_	_
TRINITY_DN10406_c5_g1	0	0.691903	0	0	0	0.340838	325	_	_	_	_	_	_	_	_	_	_	_	_	_	_	_	_	_	_	_	_	_
TRINITY_DN10407_c0_g1	1.16056	0.685495	0.316963	0.780815	0.458193	0.143059	1592	_	_	_	_	_	_	_	_	_	_	_	_	_	_	_	_	_	_	_	_	_
TRINITY_DN10407_c1_g1	0	0	5.12066	0	0	0	234	_	_	_	_	_	_	_	_	_	_	_	_	_	_	_	_	_	_	_	_	_
TRINITY_DN10407_c2_g1	0	0.300743	0.482754	0	0.306111	0	510	_	_	_	_	_	_	_	_	_	_	_	_	_	_	_	_	_	_	_	_	_
TRINITY_DN10408_c0_g1	1.9119	0.835363	0.433082	0	0	0	753	XP_022814686.1	XP_022814686.1 uncharacterized protein LOC111348338 isoform X1 [Spodoptera litura]	90.3	_	_	_	_	_	_	_	_	_	_	_	_	_	_	_	m.827|TRINITY_DN10408_c0_g1:410-751(+)	3prime_partial	PF00047.22|ig|Immunoglobulin domain|TRINITY_DN10408_c0_g1_i10|m.827:33-112
TRINITY_DN10409_c0_g1	0.541675	0	0	2.58631	1.93521	0.286411	535	_	_	_	_	_	_	_	_	_	_	_	_	_	_	_	_	_	_	_	_	_
TRINITY_DN1040_c0_g1	9.29379	10.7231	10.9839	9.71283	5.95774	7.8402	2158	XP_021193939.1	XP_021193939.1 omega-amidase NIT2 [Helicoverpa armigera]	97.7	_	_	_	_	_	_	_	_	_	_	_	_	ko:K13566	NIT2	path:ko00250	m.637|TRINITY_DN1040_c0_g1:1-396(+)	5prime_partial	PF00795.19|CN_hydrolase|Carbon-nitrogen hydrolase|TRINITY_DN1040_c0_g1_i1|m.637:1-107
TRINITY_DN1040_c1_g1	0.491989	0.177339	0	0	0.813345	0.186631	541	_	_	_	_	_	_	_	_	_	_	_	_	_	_	_	_	_	_	_	_	_
TRINITY_DN1040_c1_g2	2.24492	0	0	2.83259	0	1.29532	559	_	_	_	_	_	_	_	_	_	_	_	_	_	_	_	_	_	_	_	_	_
TRINITY_DN1040_c2_g1	1.28474	0.550616	0.693472	1.09511	1.0432	0.481578	267	_	_	_	_	_	_	_	_	_	_	_	_	_	_	_	_	_	_	_	_	_
TRINITY_DN1040_c3_g1	14.6827	13.6204	11.8842	14.6232	5.19401	3.4597	202	_	_	_	_	_	_	_	_	_	_	_	_	_	_	_	_	_	_	_	_	_
TRINITY_DN10410_c0_g1	0.432932	0.73898	0.245763	0.2144	0.178507	0.247062	1963	_	_	_	_	_	_	_	_	_	_	_	_	_	_	_	_	_	_	m.822|TRINITY_DN10410_c0_g1:148-609(+)	complete	_
TRINITY_DN10410_c1_g1	0	0.102078	0	0.292176	0	0.618805	2290	_	_	_	_	_	_	_	_	_	_	_	_	_	_	_	_	_	_	_	_	_
TRINITY_DN10411_c0_g1	0.331656	0.285218	0.191676	0.233949	0.162737	0.132526	1023	_	_	_	_	_	_	_	_	_	_	_	_	_	_	_	_	_	_	_	_	_
TRINITY_DN10412_c0_g1	0.570622	0.38029	0.149088	0.327536	0.934529	0.212177	2370	_	_	_	_	_	_	_	_	_	_	_	_	_	_	_	_	_	_	_	_	_
TRINITY_DN10412_c1_g1	1.69081	1.08757	4.93156	0	0.655146	0	223	_	_	_	_	_	_	_	_	_	_	_	_	_	_	_	_	_	_	_	_	_
TRINITY_DN10412_c2_g1	0.146153	0	0	0.420287	0.121097	0	472	_	_	_	_	_	_	_	_	_	_	_	_	_	_	_	_	_	_	_	_	_
TRINITY_DN10413_c0_g1	4.73362	2.58061	6.17435	0	4.09829	3.72305	245	_	_	_	_	_	_	_	_	_	_	_	_	_	_	_	_	_	_	_	_	_
TRINITY_DN10414_c0_g1	0.618776	1.58336	0.674743	1.46136	2.73182	0.5409	1747	_	_	_	_	_	_	_	_	_	_	_	_	_	_	_	_	_	_	_	_	_
TRINITY_DN10414_c1_g1	0	0	0	0	0	0	443	_	_	_	_	_	_	_	_	_	_	_	_	_	_	_	_	_	_	_	_	_
TRINITY_DN10414_c2_g1	0.469419	0.509377	0.738471	0	0	0.418189	631	_	_	_	_	_	_	_	_	_	_	_	_	_	_	_	_	_	_	_	_	_
TRINITY_DN10414_c3_g1	0	0.632076	0.809769	0.472384	0.575809	0.537028	243	_	_	_	_	_	_	_	_	_	_	_	_	_	_	_	_	_	_	_	_	_
TRINITY_DN10414_c4_g1	0	2.29303	0	0	0.589206	0	209	_	_	_	_	_	_	_	_	_	_	_	_	_	_	_	_	_	_	_	_	_
TRINITY_DN10414_c5_g1	0	0	0	0.590261	0	0.645823	211	_	_	_	_	_	_	_	_	_	_	_	_	_	_	_	_	_	_	_	_	_
TRINITY_DN10415_c0_g1	0	0	1.33704	0	0.712857	0.355969	319	_	_	_	_	_	_	_	_	_	_	_	_	_	_	_	_	_	_	_	_	_
TRINITY_DN10416_c0_g1	0.05885	0.301505	0.24283	0.25109	0.308957	0.210614	746	_	_	_	_	_	_	_	_	_	_	_	_	_	_	_	_	_	_	_	_	_
TRINITY_DN10417_c0_g1	1.00414	0	0	2.32101	0	0	450	_	_	_	_	_	_	_	_	_	_	_	_	_	_	_	_	_	_	_	_	_
TRINITY_DN10418_c0_g1	1.1178	0	0.728295	2.04438	0.542282	0.992777	260	_	_	_	_	_	_	_	_	_	_	_	_	_	_	_	_	_	_	_	_	_
TRINITY_DN10419_c0_g1	1.01882	0.585345	0.784509	0.661017	0.253103	0.082878	1347	NP_001296040.2	NP_001296040.2 40S ribosomal protein S23 [Plutella xylostella]	100	sp|Q962Q7|RS23_SPOFR	sp|Q962Q7|RS23_SPOFR 40S ribosomal protein S23 OS=Spodoptera frugiperda OX=7108 GN=RpS23 PE=2 SV=1	100	_	_	_	_	_	_	GO:0002181|cytoplasmic translation	GO:0005791|rough endoplasmic reticulum;GO:0022627|cytosolic small ribosomal subunit;GO:0042788|polysomal ribosome	GO:0003735|structural constituent of ribosome	ko:K02973	RP-S23e, RPS23	path:ko03010	m.819|TRINITY_DN10419_c0_g1:62-460(+)	complete	PF00164.22|Ribosom_S12_S23|Ribosomal protein S12/S23|TRINITY_DN10419_c0_g1_i2|m.819:9-122
TRINITY_DN1041_c0_g1	36.2843	33.2745	9.47581	40.282	9.5096	34.4027	207	_	_	_	_	_	_	_	_	_	_	_	_	_	_	_	_	_	_	_	_	_
TRINITY_DN1041_c0_g2	0	19.6275	16.2558	0	11.4315	0	616	_	_	_	_	_	_	_	_	_	_	_	_	_	_	_	_	_	_	_	_	_
TRINITY_DN1041_c12_g1	2.10743	0	1.18799	0	0	0.321359	661	_	_	_	_	_	_	_	_	_	_	_	_	_	_	_	_	_	_	_	_	_
TRINITY_DN1041_c1_g1	0.817832	0	12.221	0.019509	0	0.639173	1681	_	_	_	_	_	_	_	_	_	_	_	_	_	_	_	_	_	_	_	_	_
TRINITY_DN1041_c1_g2	0	0	1.01587	5.68735	7.82771	0	441	_	_	_	_	_	_	_	_	_	_	_	_	_	_	_	_	_	_	_	_	_
TRINITY_DN1041_c1_g3	0.954152	0	0	0	0	0	201	_	_	_	_	_	_	_	_	_	_	_	_	_	_	_	_	_	_	_	_	_
TRINITY_DN1041_c1_g4	0	43.892	46.1968	66.2396	21.2858	0	592	KPJ02084.1	KPJ02084.1 hypothetical protein RR46_01480 [Papilio xuthus]	64.4	_	_	_	_	_	_	_	_	_	_	_	_	_	_	_	_	_	_
TRINITY_DN1041_c2_g1	5.33899	5.53485	3.73369	3.68142	4.88599	1.85393	967	_	_	_	_	_	_	_	_	_	_	_	_	_	_	_	_	_	_	_	_	_
TRINITY_DN1041_c2_g2	14.9779	18.3724	15.5967	9.43751	8.46952	7.1265	699	_	_	_	_	_	_	_	_	_	_	_	_	_	_	_	_	_	_	_	_	_
TRINITY_DN1041_c3_g1	0.339106	0.434759	0.169668	0.357238	0.217934	0.073854	611	_	_	_	_	_	_	_	_	_	_	_	_	_	_	_	_	_	_	_	_	_
TRINITY_DN1041_c4_g1	1.27207	1.284	0.612407	0.720601	0.581595	0.730524	679	VVC89092.1	VVC89092.1 unnamed protein product [Leptidea sinapis]	72.1	_	_	_	_	_	_	_	_	_	_	_	_	_	_	_	_	_	_
TRINITY_DN1041_c6_g1	4.52745	15.897	21.464	8.85849	5.46049	6.71472	283	_	_	_	_	_	_	_	_	_	_	_	_	_	_	_	_	_	_	_	_	_
TRINITY_DN1041_c7_g1	0.162316	0.219488	0.072475	0.129697	0.184675	0.124988	1464	_	_	_	_	_	_	_	_	_	_	_	_	_	_	_	_	_	_	m.777|TRINITY_DN1041_c7_g1:1070-1462(+)	3prime_partial	_
TRINITY_DN10420_c0_g1	0	0	0	8.26943	0	0	267	_	_	_	_	_	_	_	_	_	_	_	_	_	_	_	_	_	_	_	_	_
TRINITY_DN10421_c0_g1	0	0	0.805743	1.5779	1.92871	0	533	_	_	_	_	_	_	_	_	_	_	_	_	_	_	_	_	_	_	_	_	_
TRINITY_DN10422_c0_g1	0.312888	0	0	1.49116	0	0	358	XP_022816299.1	XP_022816299.1 peroxidase-like protein 3 [Spodoptera litura]	74.5	_	_	_	_	_	_	_	_	_	_	_	_	_	_	_	m.770|TRINITY_DN10422_c0_g1:1-357(+)	internal	_
TRINITY_DN10422_c1_g1	1.49403	0	0	0	0	0	337	XP_014366177.1	XP_014366177.1 PREDICTED: uncharacterized protein LOC106717005 [Papilio machaon]	62.7	_	_	_	_	_	_	_	_	_	_	_	_	_	_	_	_	_	_
TRINITY_DN10423_c0_g1	0	0.175569	0	0.259565	0	0.186194	1589	_	_	_	_	_	_	_	_	_	_	_	_	_	_	_	_	_	_	m.807|TRINITY_DN10423_c0_g1:55-666(+)	complete	_
TRINITY_DN10424_c0_g1	0.35308	0.48192	0.07884	0.020698	0.176201	0.132486	1210	XP_022820407.1	XP_022820407.1 collagen alpha-1(XXVII) chain-like [Spodoptera litura]	81.8	sp|P45590|CU66_HYACE	sp|P45590|CU66_HYACE Larval/pupal rigid cuticle protein 66 OS=Hyalophora cecropia OX=7123 GN=CP66 PE=1 SV=1	75.9	_	_	_	_	_	_			GO:0042302|structural constituent of cuticle	_	_	_	m.825|TRINITY_DN10424_c0_g1:3-1178(+)	5prime_partial	PF00379.20|Chitin_bind_4|Insect cuticle protein|TRINITY_DN10424_c0_g1_i2|m.825:33-84
TRINITY_DN10425_c0_g1	0	1.44151	0.473728	0	9.99427	0.330145	2884	XP_022831077.1	XP_022831077.1 sodium-independent sulfate anion transporter-like isoform X1 [Spodoptera litura]	90.7	_	_	_	_	_	_	_	_	_	_	_	_	ko:K14708	SLC26A11		m.804|TRINITY_DN10425_c0_g1:294-2198(+)	complete	PF00916.17|Sulfate_transp|Sulfate permease family|TRINITY_DN10425_c0_g1_i4|m.804:33-421
TRINITY_DN10426_c0_g1	0.690877	0.630655	0	0	0.19612	0	1135	_	_	_	_	_	_	_	_	_	_	_	_	_	_	_	_	_	_	_	_	_
TRINITY_DN10427_c0_g1	0.90678	0.565268	0	0.047923	0	0	986	VVC87667.1	VVC87667.1 unnamed protein product [Leptidea sinapis]	83.9	_	_	_	_	_	_	_	_	_	_	_	_	_	_	_	_	_	_
TRINITY_DN10427_c0_g2	0	0	0	0	1.93049	0.007944	3391	XP_022829563.1	XP_022829563.1 synaptic vesicle 2-related protein-like [Spodoptera litura]	91.1	_	_	_	_	_	_	_	_	_	_	_	_	_	_	_	m.902|TRINITY_DN10427_c0_g2:188-1750(+)	complete	PF07690.13|MFS_1|Major Facilitator Superfamily|TRINITY_DN10427_c0_g2_i1|m.902:53-478;PF00083.21|Sugar_tr|Sugar (and other) transporter|TRINITY_DN10427_c0_g2_i1|m.902:82-510
TRINITY_DN10427_c1_g1	0.411199	0.069697	0	0	0	0.073199	614	_	_	_	_	_	_	_	_	_	_	_	_	_	_	_	_	_	_	_	_	_
TRINITY_DN10428_c0_g1	5.06642	7.38897	1.81825	3.9796	7.40957	2.56854	397	_	_	_	_	_	_	_	_	_	_	_	_	_	_	_	_	_	_	_	_	_
TRINITY_DN10429_c0_g1	0	5.0406	0	3.10732	0	0	443	_	_	_	_	_	_	_	_	_	_	_	_	_	_	_	_	_	_	_	_	_
TRINITY_DN1042_c0_g1	7.10957	4.33448	3.5249	5.97202	9.16824	2.36818	311	_	_	_	_	_	_	_	_	_	_	_	_	_	_	_	_	_	_	_	_	_
TRINITY_DN1042_c0_g2	26.5008	28.5764	21.319	16.4024	13.7226	12.9699	1950	_	_	_	_	_	_	_	_	_	_	_	_	_	_	_	_	_	_	_	_	_
TRINITY_DN1042_c0_g3	0	6.47375	0	7.67	0	6.67044	1073	_	_	_	_	_	_	_	_	_	_	_	_	_	_	_	_	_	_	_	_	_
TRINITY_DN1042_c0_g4	15.5426	7.99095	15.6486	0	12.1868	0	984	_	_	_	_	_	_	_	_	_	_	_	_	_	_	_	_	_	_	_	_	_
TRINITY_DN1042_c11_g1	0	0	0	0	0	0	224	_	_	_	_	_	_	_	_	_	_	_	_	_	_	_	_	_	_	_	_	_
TRINITY_DN1042_c12_g1	2.96726	2.2307	1.00869	0.493683	1.10265	0.28402	349	_	_	_	_	_	_	_	_	_	_	_	_	_	_	_	_	_	_	_	_	_
TRINITY_DN1042_c13_g1	0	0.151487	0.181911	0.408023	0.153003	0.159882	429	_	_	_	_	_	_	_	_	_	_	_	_	_	_	_	_	_	_	_	_	_
TRINITY_DN1042_c14_g1	0.283382	0.232447	0.279436	0.376903	0.232101	0	370	_	_	_	_	_	_	_	_	_	_	_	_	_	_	_	_	_	_	_	_	_
TRINITY_DN1042_c1_g1	17.7337	18.8695	7.66042	8.75569	8.91662	10.0268	1042	_	_	_	_	_	_	_	_	_	_	_	_	_	_	_	_	_	_	_	_	_
TRINITY_DN1042_c1_g2	4.45163	4.89368	2.98811	3.35101	5.44148	4.24254	5035	_	_	_	_	_	_	_	_	_	_	_	_	_	_	_	_	_	_	_	_	_
TRINITY_DN1042_c1_g3	24.6834	43.4825	0	40.1639	25.9062	2.70842	325	_	_	_	_	_	_	_	_	_	_	_	_	_	_	_	_	_	_	_	_	_
TRINITY_DN1042_c1_g4	0	0	11.8395	7.83888	6.82531	0	825	_	_	_	_	_	_	_	_	_	_	_	_	_	_	_	_	_	_	_	_	_
TRINITY_DN1042_c2_g1	11.8431	10.2449	13.45	8.58904	4.23306	3.55093	844	_	_	_	_	_	_	_	_	_	_	_	_	_	_	_	_	_	_	_	_	_
TRINITY_DN1042_c2_g2	201.726	248.429	211.453	218.665	143.984	256.322	1708	_	_	_	_	_	_	_	_	_	_	_	_	_	_	_	_	_	_	_	_	_
TRINITY_DN1042_c3_g1	0.251917	0.035074	0	0.215549	0.358026	0.07599	1717	_	_	_	_	_	_	_	_	_	_	_	_	_	_	_	_	_	_	_	_	_
TRINITY_DN1042_c4_g1	8.44348	4.25803	2.01758	5.17863	4.3187	7.37395	733	_	_	_	_	_	_	_	_	_	_	_	_	_	_	_	_	_	_	_	_	_
TRINITY_DN1042_c5_g1	92.6406	102.882	77.6704	75.6253	12.7589	54.2862	2141	KOX81272.1	KOX81272.1 hypothetical protein WN51_00180, partial [Melipona quadrifasciata]	59	_	_	_	_	_	_	_	_	_	_	_	_	_	_	_	_	_	_
TRINITY_DN1042_c6_g1	1.76604	2.14152	0.259746	2.69145	2.68303	6.76562	684	_	_	_	_	_	_	_	_	_	_	_	_	_	_	_	_	_	_	_	_	_
TRINITY_DN1042_c7_g1	1.86373	0.820896	0.80342	1.22366	2.30851	0.428447	1720	_	_	_	_	_	_	_	_	_	_	_	_	_	_	_	_	_	_	_	_	_
TRINITY_DN1042_c8_g1	23.1377	19.5255	19.7832	22.0909	24.2128	12.7438	1319	_	_	_	_	_	_	_	_	_	_	_	_	_	_	_	_	_	_	_	_	_
TRINITY_DN10430_c0_g1	0	0	2.64987	2.40213	2.81316	0	322	_	_	_	_	_	_	_	_	_	_	_	_	_	_	_	_	_	_	_	_	_
TRINITY_DN10430_c1_g1	0.450961	0.249776	0	0	0.126667	0	463	_	_	_	_	_	_	_	_	_	_	_	_	_	_	_	_	_	_	_	_	_
TRINITY_DN10430_c1_g2	3.73228	1.41318	2.00241	1.51681	0.927179	1.71643	424	_	_	_	_	_	_	_	_	_	_	_	_	_	_	_	_	_	_	_	_	_
TRINITY_DN10431_c0_g1	0	0	0	0	0.189113	0.048619	1803	RVE43158.1	RVE43158.1 hypothetical protein evm_012189 [Chilo suppressalis]	75.4	_	_	_	_	_	_	_	_	_	_	_	_	_	_	_	_	_	_
TRINITY_DN10432_c0_g1	0.311845	0.305711	0.369635	0.094583	0.235303	0.039984	895	_	_	_	_	_	_	_	_	_	_	_	_	_	_	_	_	_	_	_	_	_
TRINITY_DN10433_c0_g1	0.974677	2.39452	1.11558	2.15195	1.36218	1.41004	1382	_	_	_	_	_	_	_	_	_	_	_	_	_	_	_	_	_	_	m.769|TRINITY_DN10433_c0_g1:62-442(+)	complete	_
TRINITY_DN10434_c0_g1	0	9.37637	11.7449	0	0	5.33855	237	_	_	_	_	_	_	_	_	_	_	_	_	_	_	_	_	_	_	_	_	_
TRINITY_DN10434_c1_g1	4.96228	121.213	8.72539	3.51441	1.39305	7.05689	212	_	_	_	_	_	_	_	_	_	_	_	_	_	_	_	_	_	_	_	_	_
TRINITY_DN10434_c2_g1	0	0	0	0.572733	1.36988	0.629408	215	_	_	_	_	_	_	_	_	_	_	_	_	_	_	_	_	_	_	_	_	_
TRINITY_DN10434_c3_g1	0.311061	0.12891	0.154932	0.114293	0.130668	0.136076	457	_	_	_	_	_	_	_	_	_	_	_	_	_	_	_	_	_	_	_	_	_
TRINITY_DN10435_c0_g1	1.49403	4.65662	1.12644	5.6642	0	3.73965	337	KAF9422842.1	KAF9422842.1 hypothetical protein HW555_001626 [Spodoptera exigua]	68	_	_	_	_	_	_	_	_	_	_	_	_	_	_	_	_	_	_
TRINITY_DN10436_c0_g1	0	0.546187	0.157644	0	0	0	637	_	_	_	_	_	_	_	_	_	_	_	_	_	_	_	_	_	_	_	_	_
TRINITY_DN10437_c0_g1	61.1308	51.4583	73.4249	68.8121	30.6784	37.5227	536	XP_022830876.1	XP_022830876.1 C-type mannose receptor 2-like [Spodoptera litura]	67.6	_	_	_	_	_	_	_	_	_	_	_	_	_	_	_	m.817|TRINITY_DN10437_c0_g1:100-534(+)	3prime_partial	PF00059.18|Lectin_C|Lectin C-type domain|TRINITY_DN10437_c0_g1_i1|m.817:39-144
TRINITY_DN10438_c0_g1	11.1596	0	0	0	0	9.30765	323	_	_	_	_	_	_	_	_	_	_	_	_	_	_	_	_	_	_	_	_	_
TRINITY_DN10439_c0_g1	0.064239	0.122484	0.160407	0.107799	0.149064	0.074024	2407	_	_	_	_	_	_	_	_	_	_	_	_	_	_	_	_	_	_	_	_	_
TRINITY_DN10439_c1_g1	1.84999	0	0.467131	0	0	0.817191	518	_	_	_	_	_	_	_	_	_	_	_	_	_	_	_	_	_	_	_	_	_
TRINITY_DN1043_c0_g1	1.94302	5.14261	1.76865	3.42123	13.9605	5.71778	2432	XP_021181576.1	XP_021181576.1 putative E3 ubiquitin-protein ligase SINAT1 isoform X1 [Helicoverpa armigera]	98	_	_	_	_	_	_	_	_	_	_	_	_	ko:K04506	SIAH1	path:ko04013;path:ko04115;path:ko04120;path:ko04310	m.2978|TRINITY_DN1043_c0_g1:316-1203(+)	complete	PF03145.13|Sina|Seven in absentia protein family|TRINITY_DN1043_c0_g1_i19|m.2978:73-265
TRINITY_DN1043_c1_g1	0.207979	0.244945	0.092327	0.629546	0.611911	0.090048	1994	_	_	_	_	_	_	_	_	_	_	_	_	_	_	_	_	_	_	_	_	_
TRINITY_DN1043_c2_g1	5.23681	9.4374	7.9153	7.20066	6.25075	6.32589	568	_	_	_	_	_	_	_	_	_	_	_	_	_	_	_	_	_	_	_	_	_
TRINITY_DN1043_c3_g1	4.88938	3.00183	0	1.27612	1.48416	1.68602	364	_	_	_	_	_	_	_	_	_	_	_	_	_	_	_	_	_	_	_	_	_
TRINITY_DN1043_c4_g1	0	1.45593	0.604523	0.375916	0.930356	0	285	_	_	_	_	_	_	_	_	_	_	_	_	_	_	_	_	_	_	_	_	_
TRINITY_DN10440_c0_g1	0	0	7.2348	0	6.92629	10.3612	331	_	_	_	_	_	_	_	_	_	_	_	_	_	_	_	_	_	_	_	_	_
TRINITY_DN10440_c0_g2	8.52178	6.5077	0	7.42802	0	0	386	_	_	_	_	_	_	_	_	_	_	_	_	_	_	_	_	_	_	_	_	_
TRINITY_DN10440_c1_g1	0.42907	1.08541	0	0.337222	1.06036	0	320	_	_	_	_	_	_	_	_	_	_	_	_	_	_	_	_	_	_	_	_	_
TRINITY_DN10441_c0_g1	0	5.85771	1.02762	0	4.42378	0	388	_	_	_	_	_	_	_	_	_	_	_	_	_	_	_	_	_	_	_	_	_
TRINITY_DN10442_c0_g1	1.79573	0.647201	2.33892	2.2062	2.26168	4.74065	289	_	_	_	_	_	_	_	_	_	_	_	_	_	_	_	_	_	_	_	_	_
TRINITY_DN10443_c0_g1	18.1454	19.9963	41.0905	64.628	4.51461	20.4095	500	XP_026726784.1	XP_026726784.1 maltase A1-like [Trichoplusia ni]	90.8	sp|P13080|MALT_AEDAE	sp|P13080|MALT_AEDAE Probable maltase OS=Aedes aegypti OX=7159 GN=MAL1 PE=2 SV=1	83.1	_	_	_	_	_	_			GO:0032450|maltose alpha-glucosidase activity	_	_	_	_	_	_
TRINITY_DN10443_c1_g1	1.26005	0.574282	20.2707	11.7287	1.62685	0.496389	260	_	_	_	_	_	_	_	_	_	_	_	_	_	_	_	_	_	_	_	_	_
TRINITY_DN10444_c0_g1	15.8683	0	7.1313	14.1176	1.28913	2.1533	296	_	_	_	_	_	_	_	_	_	_	_	_	_	_	_	_	_	_	_	_	_
TRINITY_DN10445_c0_g1	0	0.602151	0.654896	0	0	6.8123	275	KAF9407493.1	KAF9407493.1 hypothetical protein HW555_012503 [Spodoptera exigua]	97.8	_	_	_	_	_	_	_	_	_	_	_	_	_	_	_	_	_	_
TRINITY_DN10446_c0_g1	0.080959	0.608912	0	0.046871	0.011539	0	7940	PCG77677.1	PCG77677.1 hypothetical protein B5V51_6600 [Heliothis virescens]	95.8	sp|H2L099|GCK1_CAEEL	sp|H2L099|GCK1_CAEEL Germinal center kinase 1 OS=Caenorhabditis elegans OX=6239 GN=gck-1 PE=1 SV=1	65.1	_	_	_	_	_	_	GO:0043066|negative regulation of apoptotic process;GO:0043407|negative regulation of MAP kinase activity;GO:0043547|positive regulation of GTPase activity;GO:0048477|oogenesis;GO:0051321|meiotic cell cycle;GO:0060281|regulation of oocyte development;GO:0060562|epithelial tube morphogenesis;GO:1903358|regulation of Golgi organization;GO:2001137|positive regulation of endocytic recycling	GO:0005737|cytoplasm;GO:0098592|cytoplasmic side of apical plasma membrane	GO:0004674|protein serine/threonine kinase activity;GO:0005524|ATP binding;GO:0046872|metal ion binding;GO:0051019|mitogen-activated protein kinase binding;GO:0106310|protein serine kinase activity;GO:0106311|protein threonine kinase activity	ko:K08833	MAP4K5, KHS1		m.873|TRINITY_DN10446_c0_g1:278-2050(+);m.874|TRINITY_DN10446_c0_g1:6516-7940(+)	complete;3prime_partial	PF09311.8|Rab5-bind|Rabaptin-like protein|TRINITY_DN10446_c0_g1_i52|m.873:224-386;PF09311.8|Rab5-bind|Rabaptin-like protein|TRINITY_DN10446_c0_g1_i52|m.873:396-508;PF01363.18|FYVE|FYVE zinc finger|TRINITY_DN10446_c0_g1_i52|m.873:512-572;PF03528.12|Rabaptin|Rabaptin|TRINITY_DN10446_c0_g1_i52|m.873:31-199;PF00069.22|Pkinase|Protein kinase domain|TRINITY_DN10446_c0_g1_i52|m.874:21-279;PF07714.14|Pki…
TRINITY_DN10446_c2_g1	0	0	0	0.726723	0	0	291	_	_	_	_	_	_	_	_	_	_	_	_	_	_	_	_	_	_	_	_	_
TRINITY_DN10447_c0_g1	0.583044	0.88	0.588678	0.508164	0	0.102996	516	_	_	_	_	_	_	_	_	_	_	_	_	_	_	_	_	_	_	_	_	_
TRINITY_DN10448_c0_g1	1.11248	0	0	0.541743	0.422159	0	502	_	_	_	_	_	_	_	_	_	_	_	_	_	_	_	_	_	_	_	_	_
TRINITY_DN10448_c0_g2	5.24444	3.48207	0.897664	4.2472	3.24205	0.591003	225	_	_	_	_	_	_	_	_	_	_	_	_	_	_	_	_	_	_	_	_	_
TRINITY_DN10448_c0_g3	4.07155	0.441574	2.17961	0.709765	2.37848	0.411529	297	_	_	_	_	_	_	_	_	_	_	_	_	_	_	_	_	_	_	_	_	_
TRINITY_DN10449_c0_g1	5.85916	3.92166	2.5177	1.67683	1.31333	2.36324	662	_	_	_	_	_	_	_	_	_	_	_	_	_	_	_	_	_	_	_	_	_
TRINITY_DN10449_c0_g2	39.2079	22.1047	19.7576	14.8345	22.9273	9.04155	352	_	_	_	_	_	_	_	_	_	_	_	_	_	_	_	_	_	_	_	_	_
TRINITY_DN1044_c0_g1	0	0	0	0	0	0	2054	_	_	_	_	_	_	_	_	_	_	_	_	_	_	_	_	_	_	_	_	_
TRINITY_DN10450_c0_g1	0.70334	0.885312	1.08252	0.423901	1.02104	0.591494	804	_	_	_	_	_	_	_	_	_	_	_	_	_	_	_	_	_	_	_	_	_
TRINITY_DN10450_c1_g1	0	0.151392	0.060964	0.084067	0.310262	0	744	_	_	_	_	_	_	_	_	_	_	_	_	_	_	_	_	_	_	_	_	_
TRINITY_DN10450_c2_g1	3.04262	0	0	0	0	0	267	_	_	_	_	_	_	_	_	_	_	_	_	_	_	_	_	_	_	_	_	_
TRINITY_DN10450_c4_g1	0.883674	3.99984	1.06885	1.8999	1.53225	2.7177	622	_	_	_	_	_	_	_	_	_	_	_	_	_	_	_	_	_	_	_	_	_
TRINITY_DN10450_c5_g1	2.49133	2.53895	1.59425	0	3.99324	2.73576	253	_	_	_	_	_	_	_	_	_	_	_	_	_	_	_	_	_	_	_	_	_
TRINITY_DN10450_c6_g1	0	0	0	0	0	0	220	_	_	_	_	_	_	_	_	_	_	_	_	_	_	_	_	_	_	_	_	_
TRINITY_DN10451_c0_g1	0	9.4069	0	0	14.6761	0	320	_	_	_	_	_	_	_	_	_	_	_	_	_	_	_	_	_	_	_	_	_
TRINITY_DN10452_c0_g1	1.35488	0	0	0	0.586449	0	245	_	_	_	_	_	_	_	_	_	_	_	_	_	_	_	_	_	_	_	_	_
TRINITY_DN10453_c0_g1	1.58167	1.59688	0.871778	0.909615	1.02747	0.613016	436	KPJ21287.1	KPJ21287.1 hypothetical protein RR48_00627 [Papilio machaon]	74.4	_	_	_	_	_	_	_	_	_	_	_	_	_	_	_	_	_	_
TRINITY_DN10453_c0_g2	1.15463	1.11971	0.873723	0.727099	1.19287	0.692395	931	KPJ21287.1	KPJ21287.1 hypothetical protein RR48_00627 [Papilio machaon]	79.1	_	_	_	_	_	_	_	_	_	_	_	_	_	_	_	_	_	_
TRINITY_DN10453_c0_g3	1.25634	0	0	0	0	0.215569	385	_	_	_	_	_	_	_	_	_	_	_	_	_	_	_	_	_	_	_	_	_
TRINITY_DN10453_c0_g4	0	0	0	0	0	2.56614	212	_	_	_	_	_	_	_	_	_	_	_	_	_	_	_	_	_	_	_	_	_
TRINITY_DN10453_c0_g5	0.686469	0.508603	1.20711	0.097655	0.887383	0.642686	486	CAD7477046.1	CAD7477046.1 unnamed protein product [Plutella xylostella]	78.6	_	_	_	_	_	_	_	_	_	_	_	_	_	_	_	_	_	_
TRINITY_DN10453_c1_g1	6.09341	17.9575	7.80003	12.795	14.9238	13.3593	211	_	_	_	_	_	_	_	_	_	_	_	_	_	_	_	_	_	_	_	_	_
TRINITY_DN10453_c2_g1	1.25375	1.14134	0	1.28151	1.07853	0	261	_	_	_	_	_	_	_	_	_	_	_	_	_	_	_	_	_	_	_	_	_
TRINITY_DN10453_c3_g1	0.219027	0	0	0.260936	0.126996	0.065117	656	_	_	_	_	_	_	_	_	_	_	_	_	_	_	_	_	_	_	_	_	_
TRINITY_DN10453_c4_g1	0	0.605133	0	0.451277	0	0	251	_	_	_	_	_	_	_	_	_	_	_	_	_	_	_	_	_	_	_	_	_
TRINITY_DN10453_c5_g1	0	0	0	0	1.13199	0	252	_	_	_	_	_	_	_	_	_	_	_	_	_	_	_	_	_	_	_	_	_
TRINITY_DN10454_c0_g1	4.02241	3.98731	1.66258	2.69024	3.08879	1.24632	371	_	_	_	_	_	_	_	_	_	_	_	_	_	_	_	_	_	_	_	_	_
TRINITY_DN10455_c0_g1	0.355249	0.602746	0.256705	0.209657	0.500138	0.223244	1502	_	_	_	_	_	_	_	_	_	_	_	_	_	_	_	_	_	_	_	_	_
TRINITY_DN10456_c0_g1	1.36818	0.823946	3.1067	4.9202	0	0.556168	250	_	_	_	_	_	_	_	_	_	_	_	_	_	_	_	_	_	_	_	_	_
TRINITY_DN10457_c0_g1	0.547707	0.464715	0.320473	0.168094	0.27672	0.348491	631	_	_	_	_	_	_	_	_	_	_	_	_	_	_	_	_	_	_	_	_	_
TRINITY_DN10458_c0_g1	0.184287	0.185263	0.160138	0.107419	0.435155	0	1171	_	_	_	_	_	_	_	_	_	_	_	_	_	_	_	_	_	_	_	_	_
TRINITY_DN10459_c0_g1	0	0.023532	0	0.239332	0.052282	0.027486	2910	_	_	_	_	_	_	_	_	_	_	_	_	_	_	_	_	_	_	_	_	_
TRINITY_DN1045_c0_g1	0.227635	0.091211	0	0	0	0	9597	GBP59455.1	GBP59455.1 hypothetical protein EVAR_80782_1 [Eumeta japonica]	83.6	_	_	_	_	_	_	_	_	_	_	_	_	_	_	_	_	_	_
TRINITY_DN10460_c0_g1	1.05244	2.72086	0	1.26833	0.844155	0.209315	438	_	_	_	_	_	_	_	_	_	_	_	_	_	_	_	_	_	_	_	_	_
TRINITY_DN10460_c0_g2	0	0.13738	0	0	0.624457	0.288532	619	_	_	_	_	_	_	_	_	_	_	_	_	_	_	_	_	_	_	_	_	_
TRINITY_DN10461_c0_g1	30.4919	23.416	14.0053	9.85621	23.0045	8.3071	526	_	_	_	_	_	_	_	_	_	_	_	_	_	_	_	_	_	_	_	_	_
TRINITY_DN10461_c1_g1	2.67235	1.92649	3.0954	0.276314	1.98156	0.648391	334	ABO45233.1	ABO45233.1 reverse transcriptase [Ostrinia nubilalis]	86.5	sp|Q10126|YSM6_CAEEL	sp|Q10126|YSM6_CAEEL Putative uncharacterized transposon-derived protein F52C9.6 OS=Caenorhabditis elegans OX=6239 GN=F52C9.6 PE=5 SV=1	52.7	_	_	_	_	_	_	_	_	_	_	_	_	_	_	_
TRINITY_DN10463_c0_g1	0	0	0	0.327649	0	0	4763	XP_021193781.1	XP_021193781.1 YLP motif-containing protein 1 isoform X1 [Helicoverpa armigera]	73.1	_	_	_	_	_	_	_	_	_	_	_	_	ko:K17602	YLPM1		m.845|TRINITY_DN10463_c0_g1:190-3393(+)	complete	PF13671.3|AAA_33|AAA domain|TRINITY_DN10463_c0_g1_i5|m.845:861-996
TRINITY_DN10464_c0_g1	0	0	0	0.263926	1.43349	0	340	_	_	_	_	_	_	_	_	_	_	_	_	_	_	_	_	_	_	_	_	_
TRINITY_DN10465_c0_g1	0	1.59297	0	2.52199	0	1.67191	646	_	_	_	_	_	_	_	_	_	_	_	_	_	_	_	_	_	_	_	_	_
TRINITY_DN10465_c0_g2	0	0	0	0.436601	0	0	257	_	_	_	_	_	_	_	_	_	_	_	_	_	_	_	_	_	_	_	_	_
TRINITY_DN10466_c0_g1	0.109768	0.296747	0	0.436572	1.78943	0.089286	553	_	_	_	_	_	_	_	_	_	_	_	_	_	_	_	_	_	_	_	_	_
TRINITY_DN10466_c1_g1	0.225891	0.370705	1.33475	0.503881	0.744538	0.584458	399	_	_	_	_	_	_	_	_	_	_	_	_	_	_	_	_	_	_	_	_	_
TRINITY_DN10466_c3_g1	3.10341	0.563774	1.4272	0	0	1.46936	263	KPJ06866.1	KPJ06866.1 hypothetical protein RR48_11365 [Papilio machaon]	71.2	_	_	_	_	_	_	_	_	_	_	_	_	_	_	_	_	_	_
TRINITY_DN10466_c4_g1	0	0.608727	0	0.45391	0	0.520019	250	_	_	_	_	_	_	_	_	_	_	_	_	_	_	_	_	_	_	_	_	_
TRINITY_DN10467_c0_g1	1.33626	0	0	0	3.28608	3.05729	486	_	_	_	_	_	_	_	_	_	_	_	_	_	_	_	_	_	_	_	_	_
TRINITY_DN10468_c0_g1	0.088373	0	0	0	0.398985	0	900	KAF9797469.1	KAF9797469.1 hypothetical protein SFRURICE_005945 [Spodoptera frugiperda]	61.5	_	_	_	_	_	_	_	_	_	_	_	_	_	_	_	_	_	_
TRINITY_DN10469_c0_g1	0	0.661303	0	1.13444	0	2.95882	330	_	_	_	_	_	_	_	_	_	_	_	_	_	_	_	_	_	_	_	_	_
TRINITY_DN10469_c0_g2	0	0	0	2.25573	0	0.520662	399	_	_	_	_	_	_	_	_	_	_	_	_	_	_	_	_	_	_	_	_	_
TRINITY_DN10469_c1_g1	0.448533	0.124242	0.149358	0	0.761374	0.131121	464	_	_	_	_	_	_	_	_	_	_	_	_	_	_	_	_	_	_	_	_	_
TRINITY_DN1046_c0_g1	0	0	0	0	0	0	2091	_	_	_	_	_	_	_	_	_	_	_	_	_	_	_	_	_	_	_	_	_
TRINITY_DN1046_c0_g2	0.911628	1.20476	1.82665	2.52639	2.80021	1.89365	1211	_	_	_	_	_	_	_	_	_	_	_	_	_	_	_	_	_	_	_	_	_
TRINITY_DN1046_c1_g1	3.74092	3.92576	2.89915	3.19498	3.64427	1.31504	1004	_	_	_	_	_	_	_	_	_	_	_	_	_	_	_	_	_	_	_	_	_
TRINITY_DN1046_c3_g1	0.590563	1.45465	0	0	0	0.25076	365	_	_	_	_	_	_	_	_	_	_	_	_	_	_	_	_	_	_	_	_	_
TRINITY_DN10470_c0_g1	0.405738	2.33284	0	0	1.32094	6.73132	354	_	_	_	_	_	_	_	_	_	_	_	_	_	_	_	_	_	_	_	_	_
TRINITY_DN10471_c0_g1	0.975958	2.15271	0	1.78663	0.845127	0	1021	KAF9413711.1	KAF9413711.1 hypothetical protein HW555_008157 [Spodoptera exigua]	88.9	_	_	_	_	_	_	_	_	_	_	_	_	_	_	_	_	_	_
TRINITY_DN10471_c1_g1	0	0	0.969488	1.17147	0	0	212	_	_	_	_	_	_	_	_	_	_	_	_	_	_	_	_	_	_	_	_	_
TRINITY_DN10471_c3_g1	0	8.07279	4.05748	0	0	0	295	_	_	_	_	_	_	_	_	_	_	_	_	_	_	_	_	_	_	_	_	_
TRINITY_DN10471_c4_g1	4.06465	0	0	11.6425	0	0	245	_	_	_	_	_	_	_	_	_	_	_	_	_	_	_	_	_	_	_	_	_
TRINITY_DN10471_c5_g1	0.057845	0.066705	0.121172	0.108109	0.085777	0.052209	1698	_	_	_	_	_	_	_	_	_	_	_	_	_	_	_	_	_	_	_	_	_
TRINITY_DN10471_c6_g1	0	0.840037	0	0	0	0.361873	303	_	_	_	_	_	_	_	_	_	_	_	_	_	_	_	_	_	_	_	_	_
TRINITY_DN10472_c0_g1	7.74143	5.095	3.36915	3.65269	2.09709	4.89609	271	_	_	_	_	_	_	_	_	_	_	_	_	_	_	_	_	_	_	_	_	_
TRINITY_DN10473_c0_g1	0	0	0	0.472904	0.407415	0	5456	_	_	_	_	_	_	_	_	_	_	_	_	_	_	_	_	_	_	_	_	_
TRINITY_DN10473_c1_g1	0	0.228632	0	0.412931	0.683739	0	372	_	_	_	_	_	_	_	_	_	_	_	_	_	_	_	_	_	_	_	_	_
TRINITY_DN10474_c0_g1	0	0	0	0	0.301902	0.395278	589	PCG65177.1	PCG65177.1 hypothetical protein B5V51_9559 [Heliothis virescens]	89	_	_	_	_	_	_	_	_	_	_	_	_	_	_	_	_	_	_
TRINITY_DN10474_c2_g1	1.71996	5.11086	0.640154	0	0	0.456791	278	_	_	_	_	_	_	_	_	_	_	_	_	_	_	_	_	_	_	_	_	_
TRINITY_DN10475_c0_g1	0	0	0	0	2.56994	0.837845	431	_	_	_	_	_	_	_	_	_	_	_	_	_	_	_	_	_	_	_	_	_
TRINITY_DN10475_c1_g1	4.05173	3.73703	0	0	0	1.6796	327	_	_	_	_	_	_	_	_	_	_	_	_	_	_	_	_	_	_	_	_	_
TRINITY_DN10476_c0_g1	0	2.16399	0	0.554951	4.73069	2.45136	219	_	_	_	_	_	_	_	_	_	_	_	_	_	_	_	_	_	_	_	_	_
TRINITY_DN10477_c0_g1	0	1.94451	0	2.8783	23.159	18.5668	432	_	_	_	_	_	_	_	_	_	_	_	_	_	_	_	_	_	_	_	_	_
TRINITY_DN10478_c0_g1	0	1.85474	3.11679	0	3.42636	0.273106	354	_	_	_	_	_	_	_	_	_	_	_	_	_	_	_	_	_	_	_	_	_
TRINITY_DN10479_c0_g1	4.97826	3.40813	3.95129	1.28873	4.56992	1.79818	468	_	_	_	_	_	_	_	_	_	_	_	_	_	_	_	_	_	_	_	_	_
TRINITY_DN1047_c0_g1	0.039322	0.162103	0.039648	0	0.165067	0.174093	1343	EZA60281.1	EZA60281.1 hypothetical protein X777_13370 [Ooceraea biroi]	61	_	_	_	_	_	_	_	_	_	_	_	_	_	_	_	_	_	_
TRINITY_DN10480_c0_g1	0	15.3048	0	9.03074	13.4843	0	361	RNA09578.1	RNA09578.1 hypothetical protein BpHYR1_039298 [Brachionus plicatilis]	74.5	_	_	_	_	_	_	_	_	_	_	_	_	_	_	_	_	_	_
TRINITY_DN10481_c0_g1	14.8116	14.5985	0	0	0	0	374	_	_	_	_	_	_	_	_	_	_	_	_	_	_	_	_	_	_	_	_	_
TRINITY_DN10482_c0_g1	0.696342	0.588264	0	0	0	0.209253	1375	_	_	_	_	_	_	_	_	_	_	_	_	_	_	_	_	_	_	_	_	_
TRINITY_DN10483_c0_g1	0	0	0	0	0	0	844	_	_	_	_	_	_	_	_	_	_	_	_	_	_	_	_	_	_	_	_	_
TRINITY_DN10483_c1_g1	0	0	0	1.2302	0	0.671643	206	_	_	_	_	_	_	_	_	_	_	_	_	_	_	_	_	_	_	_	_	_
TRINITY_DN10483_c2_g1	4.37879	0	0	2.53673	0	2.9439	229	_	_	_	_	_	_	_	_	_	_	_	_	_	_	_	_	_	_	_	_	_
TRINITY_DN10483_c3_g1	0	0.80189	1.03259	1.27375	0	0.691941	202	_	_	_	_	_	_	_	_	_	_	_	_	_	_	_	_	_	_	_	_	_
TRINITY_DN10483_c4_g1	0	0	0	0	0.708621	0	209	_	_	_	_	_	_	_	_	_	_	_	_	_	_	_	_	_	_	_	_	_
TRINITY_DN10484_c0_g1	0.234367	0.404898	0.193415	0.219902	0.145712	0.068514	1447	_	_	_	_	_	_	_	_	_	_	_	_	_	_	_	_	_	_	_	_	_
TRINITY_DN10485_c0_g1	0	0.499285	0	0	0.247301	0.256639	362	_	_	_	_	_	_	_	_	_	_	_	_	_	_	_	_	_	_	_	_	_
TRINITY_DN10486_c2_g1	0	0	0	6.10046	3.22212	0	468	_	_	_	_	_	_	_	_	_	_	_	_	_	_	_	_	_	_	_	_	_
TRINITY_DN10487_c0_g1	5.37247	4.77229	4.25983	3.89512	5.16629	3.06023	3620	_	_	_	_	_	_	_	_	_	_	_	_	_	_	_	_	_	_	_	_	_
TRINITY_DN10488_c0_g1	1.17435	0	0.60108	0.04226	0	0.009969	3192	PCG78965.1	PCG78965.1 hypothetical protein B5V51_2474 [Heliothis virescens]	75.5	_	_	_	_	_	_	_	_	_	_	_	_	_	_	_	m.855|TRINITY_DN10488_c0_g1:2-3109(+)	5prime_partial	PF00107.23|ADH_zinc_N|Zinc-binding dehydrogenase|TRINITY_DN10488_c0_g1_i3|m.855:268-356;PF08659.7|KR|KR domain|TRINITY_DN10488_c0_g1_i3|m.855:472-551;PF13602.3|ADH_zinc_N_2|Zinc-binding dehydrogenase|TRINITY_DN10488_c0_g1_i3|m.855:311-444
TRINITY_DN10488_c0_g2	0.162217	0	0.838225	0.230306	0.094816	0	787	PCG78964.1	PCG78964.1 hypothetical protein B5V51_2473 [Heliothis virescens]	82.8	_	_	_	_	_	_	_	_	_	_	_	_	ko:K00665	FASN	path:ko00061;path:ko01100;path:ko01212;path:ko04152;path:ko04910	m.862|TRINITY_DN10488_c0_g2:2-787(+)	internal	PF00975.17|Thioesterase|Thioesterase domain|TRINITY_DN10488_c0_g2_i1|m.862:4-154
TRINITY_DN10488_c1_g1	0.050851	0	0.420949	0.14422	0.044645	0.136731	819	_	_	_	_	_	_	_	_	_	_	_	_	_	_	_	_	_	_	m.863|TRINITY_DN10488_c1_g1:119-655(+)	complete	_
TRINITY_DN10489_c0_g1	0.178563	0	0	0	0	0	987	RVE45630.1	RVE45630.1 hypothetical protein evm_009743 [Chilo suppressalis]	94.5	sp|P21799|CUD4_LOCMI	sp|P21799|CUD4_LOCMI Endocuticle structural glycoprotein ABD-4 OS=Locusta migratoria OX=7004 PE=1 SV=3	77.8	_	_	_	_	_	_			GO:0042302|structural constituent of cuticle	_	_	_	_	_	_
TRINITY_DN1048_c0_g1	2.02386	2.01918	1.08697	1.38103	1.41806	1.23904	2748	XP_021190761.1	XP_021190761.1 E3 ubiquitin-protein ligase RNF13 isoform X2 [Helicoverpa armigera]	85.6	_	_	_	_	_	_	_	_	_	_	_	_	ko:K15692	RNF13, RZF		m.3188|TRINITY_DN1048_c0_g1:460-1761(+)	complete	PF13639.3|zf-RING_2|Ring finger domain|TRINITY_DN1048_c0_g1_i2|m.3188:224-268;PF17123.2|zf-RING_11|RING-like zinc finger|TRINITY_DN1048_c0_g1_i2|m.3188:226-253;PF13923.3|zf-C3HC4_2|Zinc finger, C3HC4 type (RING finger)|TRINITY_DN1048_c0_g1_i2|m.3188:226-267;PF02225.19|PA|PA domain|TRINITY_DN1048_c0_g1_i2|m.3188:55-141;PF00097.22|zf-C3HC4|Zinc finger, C3HC4 type (RING finger)|TRINITY_DN1048_c0_g1_…
TRINITY_DN1048_c1_g1	0.084004	0.426393	0.055178	0	0	0.892607	2882	XP_022820957.1	XP_022820957.1 EF-hand domain-containing protein 1-like [Spodoptera litura]	93.3	_	_	_	_	_	_	_	_	_	_	_	_	_	_	_	m.3190|TRINITY_DN1048_c1_g1:150-2630(+)	complete	PF06565.9|DUF1126|Repeat of unknown function (DUF1126)|TRINITY_DN1048_c1_g1_i3|m.3190:118-149;PF06565.9|DUF1126|Repeat of unknown function (DUF1126)|TRINITY_DN1048_c1_g1_i3|m.3190:261-294;PF06565.9|DUF1126|Repeat of unknown function (DUF1126)|TRINITY_DN1048_c1_g1_i3|m.3190:438-467
TRINITY_DN10490_c0_g1	0.041346	0	0	0.190037	0	0.03735	1350	XP_035452675.1	XP_035452675.1 abasic site processing protein HMCES-like isoform X2 [Spodoptera frugiperda]	90.5	_	_	_	_	_	_	_	_	_	_	_	_	_	_	_	m.791|TRINITY_DN10490_c0_g1:611-1318(+)	complete	PF02586.11|SRAP|SOS response associated peptidase (SRAP)|TRINITY_DN10490_c0_g1_i5|m.791:1-184
TRINITY_DN10491_c0_g1	0.321498	0.274461	0.198882	0.091778	0.899488	0.287751	706	_	_	_	_	_	_	_	_	_	_	_	_	_	_	_	_	_	_	_	_	_
TRINITY_DN10492_c0_g1	0.732003	0.23707	0.470811	0.507852	0.317457	0.355786	4310	XP_022815804.1	XP_022815804.1 A disintegrin and metalloproteinase with thrombospondin motifs 16-like [Spodoptera litura]	94.6	_	_	_	_	_	_	_	_	_	_	_	_	_	_	_	m.797|TRINITY_DN10492_c0_g1:273-3257(+)	complete	PF01421.16|Reprolysin|Reprolysin (M12B) family zinc metalloprotease|TRINITY_DN10492_c0_g1_i2|m.797:254-468;PF13688.3|Reprolysin_5|Metallo-peptidase family M12|TRINITY_DN10492_c0_g1_i2|m.797:262-442;PF13574.3|Reprolysin_2|Metallo-peptidase family M12B Reprolysin-like|TRINITY_DN10492_c0_g1_i2|m.797:284-456;PF13582.3|Reprolysin_3|Metallo-peptidase family M12B Reprolysin-like|TRINITY_DN10492_c0_g1_i2…
TRINITY_DN10493_c0_g1	0.049074	0.313703	0.269985	0.467641	0.538409	0.568969	4269	_	_	_	_	_	_	_	_	_	_	_	_	_	_	_	_	_	_	_	_	_
TRINITY_DN10494_c0_g1	0.299384	0	0	0.30728	0.614298	0	1650	XP_021186656.1	XP_021186656.1 crossover junction endonuclease EME1 [Helicoverpa armigera]	75.7	_	_	_	_	_	_	_	_	_	_	_	_	ko:K10882	EME1, MMS4	path:ko03440;path:ko03460	m.800|TRINITY_DN10494_c0_g1:217-1506(+)	complete	PF02732.12|ERCC4|ERCC4 domain|TRINITY_DN10494_c0_g1_i16|m.800:148-302
TRINITY_DN10494_c0_g2	0	0	0	0.54908	0	0.393364	464	_	_	_	_	_	_	_	_	_	_	_	_	_	_	_	_	_	_	_	_	_
TRINITY_DN10494_c1_g1	0.092882	0.159258	0.096268	0.098625	0.122554	0	870	_	_	_	_	_	_	_	_	_	_	_	_	_	_	_	_	_	_	_	_	_
TRINITY_DN10495_c0_g1	1.39157	2.11846	0.9978	1.00524	0.978282	1.25049	2624	XP_021186752.1	XP_021186752.1 serine/threonine-protein kinase 40-like [Helicoverpa armigera]	96.1	sp|Q9V3Z1|TRIB_DROME	sp|Q9V3Z1|TRIB_DROME Tribbles OS=Drosophila melanogaster OX=7227 GN=trbl PE=1 SV=1	51.3	_	_	_	_	_	_	GO:0006468|protein phosphorylation;GO:0007049|cell cycle;GO:0007370|ventral furrow formation;GO:0010888|negative regulation of lipid storage;GO:0032436|positive regulation of proteasomal ubiquitin-dependent protein catabolic process;GO:0042593|glucose homeostasis;GO:0043405|regulation of MAP kinase activity;GO:0045793|positive regulation of cell size;GO:0045839|negative regulation of mitotic nucl…	GO:0005634|nucleus;GO:0005829|cytosol;GO:0005938|cell cortex	GO:0004860|protein kinase inhibitor activity;GO:0005524|ATP binding;GO:0031434|mitogen-activated protein kinase kinase binding;GO:0042803|protein homodimerization activity;GO:0046982|protein heterodimerization activity	ko:K16312	STK40, SHIK		m.813|TRINITY_DN10495_c0_g1:154-2091(+)	complete	PF00069.22|Pkinase|Protein kinase domain|TRINITY_DN10495_c0_g1_i1|m.813:102-377;PF07714.14|Pkinase_Tyr|Protein tyrosine kinase|TRINITY_DN10495_c0_g1_i1|m.813:206-376;PF14531.3|Kinase-like|Kinase-like|TRINITY_DN10495_c0_g1_i1|m.813:224-323
TRINITY_DN10495_c0_g2	2.30278	2.0106	1.65826	1.19888	1.40859	1.19641	2178	PCG63839.1	PCG63839.1 hypothetical protein B5V51_11662 [Heliothis virescens]	96.2	_	_	_	_	_	_	_	_	_	_	_	_	_	_	_	m.815|TRINITY_DN10495_c0_g2:201-1379(+)	complete	PF14800.3|DUF4481|Domain of unknown function (DUF4481)|TRINITY_DN10495_c0_g2_i1|m.815:105-293
TRINITY_DN10495_c0_g3	0	1.01265	0	0	2.40919	1.73414	656	_	_	_	_	_	_	_	_	_	_	_	_	_	_	_	_	_	_	_	_	_
TRINITY_DN10495_c0_g4	0	0	0	5.34205	0	3.57589	991	_	_	_	_	_	_	_	_	_	_	_	_	_	_	_	_	_	_	_	_	_
TRINITY_DN10495_c0_g5	9.31073	13.7619	10.8285	3.69393	6.63736	1.5704	742	_	_	_	_	_	_	_	_	_	_	_	_	_	_	_	_	_	_	_	_	_
TRINITY_DN10495_c0_g6	1.60584	1.74158	0.670259	1.17536	1.70613	0.110315	500	_	_	_	_	_	_	_	_	_	_	_	_	_	_	_	_	_	_	_	_	_
TRINITY_DN10495_c1_g1	1.09283	0.604414	5.11298	2.11153	8.6373	0.304594	340	_	_	_	_	_	_	_	_	_	_	_	_	_	_	_	_	_	_	_	_	_
TRINITY_DN10495_c2_g1	0.807366	2.24795	3.87795	2.97663	2.78611	2.56614	212	_	_	_	_	_	_	_	_	_	_	_	_	_	_	_	_	_	_	_	_	_
TRINITY_DN10495_c4_g1	0.836327	0	0	2.27112	0	2.1391	372	_	_	_	_	_	_	_	_	_	_	_	_	_	_	_	_	_	_	_	_	_
TRINITY_DN10496_c0_g1	0.601945	0	0.056539	0.07771	0.047965	0	781	_	_	_	_	_	_	_	_	_	_	_	_	_	_	_	_	_	_	_	_	_
TRINITY_DN10497_c0_g1	0	0	0	0	0.993408	0	961	_	_	_	_	_	_	_	_	_	_	_	_	_	_	_	_	_	_	_	_	_
TRINITY_DN10498_c0_g1	5.59517	6.47713	5.91878	4.57542	7.6177	2.98573	2890	_	_	_	_	_	_	_	_	_	_	_	_	_	_	_	_	_	_	_	_	_
TRINITY_DN10499_c0_g1	0	0.512426	0	0.951907	0	1.14424	2128	XP_021191882.1	XP_021191882.1 AMP deaminase 2-like [Helicoverpa armigera]	81.6	_	_	_	_	_	_	_	_	_	_	_	_	ko:K01490	AMPD	path:ko00230;path:ko01100;path:ko01110;path:ko01130	m.896|TRINITY_DN10499_c0_g1:146-2128(+)	3prime_partial	PF00962.19|A_deaminase|Adenosine/AMP deaminase|TRINITY_DN10499_c0_g1_i1|m.896:328-661
TRINITY_DN1049_c0_g1	10.0866	10.9435	9.00903	8.36758	9.32781	13.2761	4662	CAB3219884.1	CAB3219884.1 unnamed protein product [Arctia plantaginis]	84.5	_	_	_	_	_	_	_	_	_	_	_	_	_	_	_	m.3199|TRINITY_DN1049_c0_g1:1025-1336(+)	complete	_
TRINITY_DN104_c0_g1	18.3627	16.0489	18.0672	10.1915	12.2515	16.8401	1170	_	_	_	_	_	_	_	_	_	_	_	_	_	_	_	_	_	_	_	_	_
TRINITY_DN10500_c0_g1	0.078921	0.164472	0	0.036184	0.036919	0	974	VVC98164.1	VVC98164.1 unnamed protein product, partial [Leptidea sinapis]	65.6	_	_	_	_	_	_	_	_	_	_	_	_	_	_	_	_	_	_
TRINITY_DN10500_c0_g2	3.74595	1.43016	0.864518	0.375014	0	0	322	_	_	_	_	_	_	_	_	_	_	_	_	_	_	_	_	_	_	_	_	_
TRINITY_DN10501_c0_g1	0.639238	0.55236	0.441438	0.57357	0.311839	0.075048	663	_	_	_	_	_	_	_	_	_	_	_	_	_	_	_	_	_	_	_	_	_
TRINITY_DN10501_c0_g2	0	0.921821	0	0.733409	0	1.19082	1867	XP_021189723.1	XP_021189723.1 malate dehydrogenase, glyoxysomal-like isoform X1 [Helicoverpa armigera]	84.6	_	_	_	_	_	_	_	_	_	_	_	_	ko:K00026	MDH2	path:ko00020;path:ko00270;path:ko00620;path:ko00630;path:ko00710;path:ko01100;path:ko01110;path:ko01120;path:ko01130;path:ko01200	m.901|TRINITY_DN10501_c0_g2:112-1572(+)	complete	PF00056.20|Ldh_1_N|lactate/malate dehydrogenase, NAD binding domain|TRINITY_DN10501_c0_g2_i3|m.901:126-276
TRINITY_DN10501_c0_g3	0.514182	0	0	0.056005	0	0	992	_	_	_	_	_	_	_	_	_	_	_	_	_	_	_	_	_	_	_	_	_
TRINITY_DN10501_c1_g1	0	0	0	1.70406	2.04347	0	216	_	_	_	_	_	_	_	_	_	_	_	_	_	_	_	_	_	_	_	_	_
TRINITY_DN10502_c0_g1	0	0	0.119074	0.022704	0.128305	0.144826	1643	XP_028033829.1	XP_028033829.1 uncharacterized protein LOC114245752 [Bombyx mandarina]	66.5	_	_	_	_	_	_	_	_	_	_	_	_	_	_	_	m.1026|TRINITY_DN10502_c0_g1:1-744(+);m.1027|TRINITY_DN10502_c0_g1:1117-1641(+)	5prime_partial;3prime_partial	_
TRINITY_DN10502_c1_g1	1.36438	3.05272	0.493467	0	0.738614	0	314	_	_	_	_	_	_	_	_	_	_	_	_	_	_	_	_	_	_	_	_	_
TRINITY_DN10502_c2_g1	0.667728	1.29895	1.47467	10.8417	0	3.83437	248	_	_	_	_	_	_	_	_	_	_	_	_	_	_	_	_	_	_	_	_	_
TRINITY_DN10502_c3_g1	0	1.16992	0	0	0	0	257	_	_	_	_	_	_	_	_	_	_	_	_	_	_	_	_	_	_	_	_	_
TRINITY_DN10503_c0_g1	0.520901	0.648216	0.149365	0.515496	0.488418	0.980212	1043	_	_	_	_	_	_	_	_	_	_	_	_	_	_	_	_	_	_	_	_	_
TRINITY_DN10504_c0_g1	7.22633	28.8025	14.4674	3.15298	2.89489	5.96097	1937	KAF9414828.1	KAF9414828.1 hypothetical protein HW555_007361 [Spodoptera exigua]	72.4	_	_	_	_	_	_	_	_	_	_	_	_	_	_	_	_	_	_
TRINITY_DN10505_c0_g1	3.45482	0	5.51804	7.74551	0	0	1050	_	_	_	_	_	_	_	_	_	_	_	_	_	_	_	_	_	_	_	_	_
TRINITY_DN10505_c0_g2	5.16285	5.80862	2.26927	3.56993	4.5478	4.92333	282	_	_	_	_	_	_	_	_	_	_	_	_	_	_	_	_	_	_	_	_	_
TRINITY_DN10505_c1_g1	0	2.55617	0	0.47814	0	0	241	_	_	_	_	_	_	_	_	_	_	_	_	_	_	_	_	_	_	_	_	_
TRINITY_DN10505_c1_g2	0	0	0	1.47111	0	0	237	_	_	_	_	_	_	_	_	_	_	_	_	_	_	_	_	_	_	_	_	_
TRINITY_DN10505_c2_g1	0.206092	0.308688	0.426384	0.511562	0.361773	0.046172	812	_	_	_	_	_	_	_	_	_	_	_	_	_	_	_	_	_	_	_	_	_
TRINITY_DN10505_c3_g1	0	0	0	1.8453	0	0	206	_	_	_	_	_	_	_	_	_	_	_	_	_	_	_	_	_	_	_	_	_
TRINITY_DN10505_c4_g1	105.341	0	123.06	140.775	0	0	298	_	_	_	_	_	_	_	_	_	_	_	_	_	_	_	_	_	_	_	_	_
TRINITY_DN10505_c5_g1	2.88376	0	0	9.36137	0	2.37497	303	_	_	_	_	_	_	_	_	_	_	_	_	_	_	_	_	_	_	_	_	_
TRINITY_DN10505_c6_g1	0.327686	0.37578	0.265199	0.078019	0.353795	0.130948	1032	XP_026731233.1	XP_026731233.1 uncharacterized protein LOC113496256 [Trichoplusia ni]	86.6	_	_	_	_	_	_	_	_	_	_	_	_	_	_	_	m.1022|TRINITY_DN10505_c6_g1:3-437(+)	5prime_partial	PF04500.13|FLYWCH|FLYWCH zinc finger domain|TRINITY_DN10505_c6_g1_i1|m.1022:26-85
TRINITY_DN10505_c7_g1	0.031627	0.071656	0.09485	0.343614	0	0.124739	1268	KPJ15508.1	KPJ15508.1 hypothetical protein RR48_09437 [Papilio machaon]	70.7	_	_	_	_	_	_	_	_	_	_	_	_	_	_	_	_	_	_
TRINITY_DN10505_c8_g1	0.116693	0.149489	0.1204	0.082966	0	0.103747	750	_	_	_	_	_	_	_	_	_	_	_	_	_	_	_	_	_	_	_	_	_
TRINITY_DN10506_c0_g1	0	0.472677	0	0	0.393248	0.505544	3424	_	_	_	_	_	_	_	_	_	_	_	_	_	_	_	_	_	_	_	_	_
TRINITY_DN10507_c0_g1	0.03729	0.088073	0	0.142195	0.125111	0.109076	1574	_	_	_	_	_	_	_	_	_	_	_	_	_	_	_	_	_	_	_	_	_
TRINITY_DN10508_c0_g1	9.7375	3.87084	1.66354	1.7306	0	2.85304	304	_	_	_	_	_	_	_	_	_	_	_	_	_	_	_	_	_	_	m.1015|TRINITY_DN10508_c0_g1:3-302(+)	internal	_
TRINITY_DN10509_c0_g1	0	0.142611	0	0.127478	0	0.150568	439	_	_	_	_	_	_	_	_	_	_	_	_	_	_	_	_	_	_	_	_	_
TRINITY_DN10509_c0_g2	0.754336	0.360193	0.216141	1.46435	1.23847	0	403	PCG79758.1	PCG79758.1 hypothetical protein B5V51_14236 [Heliothis virescens]	83.6	_	_	_	_	_	_	_	_	_	_	_	_	_	_	_	m.1024|TRINITY_DN10509_c0_g2:1-402(+)	internal	PF02582.11|DUF155|Uncharacterised ACR, YagE family COG1723|TRINITY_DN10509_c0_g2_i1|m.1024:27-134
TRINITY_DN1050_c0_g1	5.24711	0	8.48124	3.36964	4.63715	2.1965	582	_	_	_	_	_	_	_	_	_	_	_	_	_	_	_	_	_	_	_	_	_
TRINITY_DN10510_c0_g1	0.338073	1.90818	0	1.45926	3.2665	0	351	XP_022836314.1	XP_022836314.1 twitchin isoform X18 [Spodoptera litura]	95.7	sp|Q23551|UNC22_CAEEL	sp|Q23551|UNC22_CAEEL Twitchin OS=Caenorhabditis elegans OX=6239 GN=unc-22 PE=1 SV=3	67.2	_	_	_	_	_	_	GO:0008344|adult locomotory behavior;GO:0018105|peptidyl-serine phosphorylation;GO:0018107|peptidyl-threonine phosphorylation;GO:0035095|behavioral response to nicotine;GO:0040017|positive regulation of locomotion;GO:0045989|positive regulation of striated muscle contraction;GO:0051782|negative regulation of cell division;GO:0060298|positive regulation of sarcomere organization	GO:0031672|A band	GO:0004674|protein serine/threonine kinase activity;GO:0005516|calmodulin binding;GO:0005524|ATP binding;GO:0019901|protein kinase binding;GO:0046872|metal ion binding;GO:0106310|protein serine kinase activity;GO:0106311|protein threonine kinase activity	_	_	_	m.1013|TRINITY_DN10510_c0_g1:3-350(+)	internal	PF00041.18|fn3|Fibronectin type III domain|TRINITY_DN10510_c0_g1_i1|m.1013:10-93
TRINITY_DN10511_c0_g1	0	0	0	21.2127	0	12.6622	256	_	_	_	_	_	_	_	_	_	_	_	_	_	_	_	_	_	_	_	_	_
TRINITY_DN10512_c0_g1	1.27862	1.15415	0.25106	1.21619	0.447794	0.303392	1419	_	_	_	_	_	_	_	_	_	_	_	_	_	_	_	_	_	_	_	_	_
TRINITY_DN10512_c1_g1	0	0	4.4691	0	2.10987	2.18355	265	_	_	_	_	_	_	_	_	_	_	_	_	_	_	_	_	_	_	_	_	_
TRINITY_DN10512_c1_g2	0	0	0	2.64157	2.22627	0	325	_	_	_	_	_	_	_	_	_	_	_	_	_	_	_	_	_	_	_	_	_
TRINITY_DN10512_c2_g1	0	0	0	0	0	0.591003	225	_	_	_	_	_	_	_	_	_	_	_	_	_	_	_	_	_	_	_	_	_
TRINITY_DN10512_c3_g1	1.26005	0	2.99919	2.1355	3.79597	0.992777	260	_	_	_	_	_	_	_	_	_	_	_	_	_	_	_	_	_	_	_	_	_
TRINITY_DN10513_c0_g1	0.992728	0.547878	0	0.366101	0.607181	0.144614	446	_	_	_	_	_	_	_	_	_	_	_	_	_	_	_	_	_	_	_	_	_
TRINITY_DN10514_c0_g1	0.777397	0.328817	0	0	0	0.04303	1538	_	_	_	_	_	_	_	_	_	_	_	_	_	_	_	_	_	_	_	_	_
TRINITY_DN10515_c0_g1	0	0.591605	0.126262	0.799007	0	0.43676	956	_	_	_	_	_	_	_	_	_	_	_	_	_	_	_	_	_	_	_	_	_
TRINITY_DN10515_c0_g2	0	2.09448	0	3.66826	0	0	278	_	_	_	_	_	_	_	_	_	_	_	_	_	_	_	_	_	_	_	_	_
TRINITY_DN10515_c1_g1	0.511375	0	0.282722	0.629396	0.142613	0	441	_	_	_	_	_	_	_	_	_	_	_	_	_	_	_	_	_	_	_	_	_
TRINITY_DN10515_c2_g1	2.04285	1.40665	0.339308	0.498444	1.11211	1.43112	348	_	_	_	_	_	_	_	_	_	_	_	_	_	_	_	_	_	_	_	_	_
TRINITY_DN10515_c2_g2	2.54879	2.64945	0.544901	0.702127	2.19611	0.823057	297	_	_	_	_	_	_	_	_	_	_	_	_	_	_	_	_	_	_	_	_	_
TRINITY_DN10515_c3_g1	0	0.38159	0.465915	0	0.743322	0.368495	314	_	_	_	_	_	_	_	_	_	_	_	_	_	_	_	_	_	_	_	_	_
TRINITY_DN10515_c4_g1	2.15675	1.49497	1.35145	0.906113	2.637	1.07592	711	_	_	_	_	_	_	_	_	_	_	_	_	_	_	_	_	_	_	_	_	_
TRINITY_DN10515_c5_g1	0	0	0	0	2.01175	0.46775	273	_	_	_	_	_	_	_	_	_	_	_	_	_	_	_	_	_	_	_	_	_
TRINITY_DN10516_c0_g1	0.25525	1.25543	0.501838	1.23187	2.02513	0.88133	383	_	_	_	_	_	_	_	_	_	_	_	_	_	_	_	_	_	_	_	_	_
TRINITY_DN10516_c1_g1	0	0.595093	0	3.14769	0.560186	0.510604	254	_	_	_	_	_	_	_	_	_	_	_	_	_	_	_	_	_	_	_	_	_
TRINITY_DN10517_c0_g1	6.11028	5.22258	7.67815	4.35204	6.76281	2.85833	2050	CAD7429037.1	CAD7429037.1 unnamed protein product [Timema monikensis]	49.5	_	_	_	_	_	_	_	_	_	_	_	_	_	_	_	m.1030|TRINITY_DN10517_c0_g1:1-504(+)	5prime_partial	_
TRINITY_DN10518_c0_g1	1.99814	1.16277	0.918127	0.356192	0	0.152512	1056	CAB3233938.1	CAB3233938.1 unnamed protein product [Arctia plantaginis]	73.9	_	_	_	_	_	_	_	_	_	_	_	_	_	_	_	_	_	_
TRINITY_DN10518_c1_g1	0	0	0	0	1.17985	0	831	_	_	_	_	_	_	_	_	_	_	_	_	_	_	_	_	_	_	_	_	_
TRINITY_DN10518_c1_g2	0	0.550043	1.38694	0.826943	0	0.481578	267	_	_	_	_	_	_	_	_	_	_	_	_	_	_	_	_	_	_	_	_	_
TRINITY_DN10518_c3_g1	0	0.653113	0	0	0	0.227105	378	_	_	_	_	_	_	_	_	_	_	_	_	_	_	_	_	_	_	_	_	_
TRINITY_DN10519_c0_g1	0.173426	0.185919	0.056686	0.253353	0.629563	0.169136	3275	VVD02187.1	VVD02187.1 unnamed protein product [Leptidea sinapis]	57.9	_	_	_	_	_	_	_	_	_	_	_	_	_	_	_	_	_	_
TRINITY_DN1051_c0_g1	0	0.70349	0	1.08226	0	0.293715	3531	XP_021181703.1	XP_021181703.1 uncharacterized protein LOC110370284 [Helicoverpa armigera]	90.1	_	_	_	_	_	_	_	_	_	_	_	_	_	_	_	m.612|TRINITY_DN1051_c0_g1:180-1091(+)	complete	_
TRINITY_DN10520_c0_g1	0.21241	0	0.107636	0.512114	0	0.846206	539	_	_	_	_	_	_	_	_	_	_	_	_	_	_	_	_	_	_	_	_	_
TRINITY_DN10521_c0_g1	0	0	0	0	1.00919	0	1268	AGH25550.1	AGH25550.1 CCHamide [Helicoverpa armigera]	97.2	sp|C0HKT1|CCHA2_AGRIP	sp|C0HKT1|CCHA2_AGRIP Neuropeptide CCHamide-2 OS=Agrotis ipsilon OX=56364 PE=1 SV=1	94.4	_	_	_	_	_	_	GO:0007218|neuropeptide signaling pathway	GO:0005576|extracellular region	_	_	_	_	m.917|TRINITY_DN10521_c0_g1:101-529(+)	complete	_
TRINITY_DN10522_c0_g1	4.3822	5.93779	2.10393	4.30744	4.30901	1.88959	481	_	_	_	_	_	_	_	_	_	_	_	_	_	_	_	_	_	_	_	_	_
TRINITY_DN10523_c0_g1	0.313046	0.317678	0.104823	0.165586	0.089006	0.030182	1096	_	_	_	_	_	_	_	_	_	_	_	_	_	_	_	_	_	_	_	_	_
TRINITY_DN10524_c0_g1	3.98805	2.0475	3.2113	3.54576	0.09765	4.49443	772	_	_	_	_	_	_	_	_	_	_	_	_	_	_	_	_	_	_	m.1004|TRINITY_DN10524_c0_g1:2-301(+)	5prime_partial	_
TRINITY_DN10524_c1_g1	4.67534	0	4.16082	3.08749	0	0	358	_	_	_	_	_	_	_	_	_	_	_	_	_	_	_	_	_	_	_	_	_
TRINITY_DN10524_c2_g1	0	0.483939	0.399366	0.070214	0.53809	0	1471	_	_	_	_	_	_	_	_	_	_	_	_	_	_	_	_	_	_	_	_	_
TRINITY_DN10524_c3_g1	0	0	0	0	0.442505	0	292	_	_	_	_	_	_	_	_	_	_	_	_	_	_	_	_	_	_	_	_	_
TRINITY_DN10525_c0_g1	5.93272	3.88318	0	0	0	1.86681	312	_	_	_	_	_	_	_	_	_	_	_	_	_	_	_	_	_	_	_	_	_
TRINITY_DN10526_c0_g1	0.221443	0.180532	0.270032	0.069258	0.219968	0.079123	5280	_	_	_	_	_	_	_	_	_	_	_	_	_	_	_	_	_	_	_	_	_
TRINITY_DN10526_c0_g2	0	0.190913	0.144511	0.198329	0	0	771	_	_	_	_	_	_	_	_	_	_	_	_	_	_	_	_	_	_	m.915|TRINITY_DN10526_c0_g2:150-452(+)	complete	_
TRINITY_DN10526_c0_g3	0.16818	0.162136	0.218519	0.163291	0.25043	0.092966	3204	_	_	_	_	_	_	_	_	_	_	_	_	_	_	_	_	_	_	_	_	_
TRINITY_DN10526_c0_g4	0.164496	0	0	0.038935	0.096117	0	780	_	_	_	_	_	_	_	_	_	_	_	_	_	_	_	_	_	_	_	_	_
TRINITY_DN10526_c1_g1	0	0	2.98468	0	0	0	233	_	_	_	_	_	_	_	_	_	_	_	_	_	_	_	_	_	_	_	_	_
TRINITY_DN10526_c2_g1	0	0.707045	0.912574	0	0	0.6016	222	_	_	_	_	_	_	_	_	_	_	_	_	_	_	_	_	_	_	_	_	_
TRINITY_DN10527_c0_g1	1.16848	3.18409	0.982125	0.889096	0.896251	0.64112	1627	_	_	_	_	_	_	_	_	_	_	_	_	_	_	_	_	_	_	_	_	_
TRINITY_DN10527_c0_g2	2.03916	0	1.66245	1.13995	1.13497	0.559944	1713	_	_	_	_	_	_	_	_	_	_	_	_	_	_	_	_	_	_	_	_	_
TRINITY_DN10527_c1_g1	0.545888	1.08286	0	1.02374	0.890505	0	493	_	_	_	_	_	_	_	_	_	_	_	_	_	_	_	_	_	_	_	_	_
TRINITY_DN10527_c2_g1	2.29766	6.43499	4.61836	8.64731	5.45961	4.87183	220	_	_	_	_	_	_	_	_	_	_	_	_	_	_	_	_	_	_	_	_	_
TRINITY_DN10527_c3_g1	0	0.322873	0	0	0.162788	0	419	_	_	_	_	_	_	_	_	_	_	_	_	_	_	_	_	_	_	_	_	_
TRINITY_DN10527_c4_g1	0.578242	0.273829	0.330948	0.183114	1.45832	0.229667	707	_	_	_	_	_	_	_	_	_	_	_	_	_	_	_	_	_	_	_	_	_
TRINITY_DN10527_c5_g1	0.315517	0	0	0.232057	1.03042	0.533607	357	_	_	_	_	_	_	_	_	_	_	_	_	_	_	_	_	_	_	_	_	_
TRINITY_DN10528_c0_g1	3.89415	3.29854	3.212	2.99424	3.35772	1.02124	586	_	_	_	_	_	_	_	_	_	_	_	_	_	_	_	_	_	_	_	_	_
TRINITY_DN10528_c1_g1	0.390287	0.125103	0.406018	0.075007	0.156697	0.031893	1052	_	_	_	_	_	_	_	_	_	_	_	_	_	_	_	_	_	_	_	_	_
TRINITY_DN1052_c0_g1	0	3.10228	0.193182	3.71537	0.163951	2.55379	868	_	_	_	_	_	_	_	_	_	_	_	_	_	_	_	_	_	_	_	_	_
TRINITY_DN10530_c0_g1	0	0	0	2.92628	5.27813	7.22998	331	_	_	_	_	_	_	_	_	_	_	_	_	_	_	_	_	_	_	_	_	_
TRINITY_DN10531_c0_g1	19.7859	0	0	11.2392	0	8.98582	310	_	_	_	_	_	_	_	_	_	_	_	_	_	_	_	_	_	_	_	_	_
TRINITY_DN10532_c0_g1	0.504497	1.41227	0.194848	0.089827	0	0.056371	715	ABO45233.1	ABO45233.1 reverse transcriptase [Ostrinia nubilalis]	87.1	_	_	_	_	_	_	_	_	_	_	_	_	ko:K02649	PIK3R1_2_3	path:ko01521;path:ko01522;path:ko01524;path:ko04012;path:ko04014;path:ko04015;path:ko04024;path:ko04062;path:ko04066;path:ko04068;path:ko04070;path:ko04071;path:ko04072;path:ko04140;path:ko04150;path:ko04151;path:ko04152;path:ko04210;path:ko04211;path:ko04213;path:ko04360;path:ko04370;path:ko04380;path:ko04510;path:ko04550;path:ko04611;path:ko04620;path:ko04630;path:ko04650;path:ko04660;path:ko04…	_	_	_
TRINITY_DN10532_c1_g1	1.41703	0	0	0	0	0	236	_	_	_	_	_	_	_	_	_	_	_	_	_	_	_	_	_	_	_	_	_
TRINITY_DN10533_c0_g1	0	0.563774	0	2.95792	9.61424	3.37139	263	_	_	_	_	_	_	_	_	_	_	_	_	_	_	_	_	_	_	_	_	_
TRINITY_DN10534_c0_g1	42.6393	28.9684	0	0	0	0	265	_	_	_	_	_	_	_	_	_	_	_	_	_	_	_	_	_	_	_	_	_
TRINITY_DN10535_c0_g1	10.0468	12.6844	4.78223	15.6248	0	19.1835	273	_	_	_	_	_	_	_	_	_	_	_	_	_	_	_	_	_	_	_	_	_
TRINITY_DN10536_c0_g1	4.77762	3.98961	3.87824	1.39441	2.92775	0.784071	2864	CAB0018214.1	CAB0018214.1 unnamed protein product [Nesidiocoris tenuis]	52.4	_	_	_	_	_	_	_	_	_	_	_	_	_	_	_	_	_	_
TRINITY_DN10537_c0_g1	1.58532	2.15179	1.20611	3.84877	1.16069	1.06018	438	_	_	_	_	_	_	_	_	_	_	_	_	_	_	_	_	_	_	_	_	_
TRINITY_DN10537_c0_g2	5.99924	1.75211	1.62026	2.7921	1.26943	0	298	_	_	_	_	_	_	_	_	_	_	_	_	_	_	_	_	_	_	_	_	_
TRINITY_DN10538_c0_g1	2.23549	2.98361	0.19899	0	0	0	415	_	_	_	_	_	_	_	_	_	_	_	_	_	_	_	_	_	_	m.1031|TRINITY_DN10538_c0_g1:102-413(+)	3prime_partial	_
TRINITY_DN10538_c0_g2	6.18048	3.40334	2.15546	0	0	0	262	_	_	_	_	_	_	_	_	_	_	_	_	_	_	_	_	_	_	_	_	_
TRINITY_DN10539_c0_g1	0	0	0	0	0	2.98993	223	_	_	_	_	_	_	_	_	_	_	_	_	_	_	_	_	_	_	_	_	_
TRINITY_DN1053_c0_g1	4.28798	4.29249	3.48118	3.43375	3.37229	4.23248	2056	_	_	_	_	_	_	_	_	_	_	_	_	_	_	_	_	_	_	_	_	_
TRINITY_DN1053_c0_g2	4.59936	5.79499	5.47221	3.69954	3.80487	6.26179	740	_	_	_	_	_	_	_	_	_	_	_	_	_	_	_	_	_	_	_	_	_
TRINITY_DN1053_c0_g3	4.63276	5.4218	3.71888	2.45426	3.6771	1.42998	1418	_	_	_	_	_	_	_	_	_	_	_	_	_	_	_	_	_	_	_	_	_
TRINITY_DN1053_c10_g1	0.683254	1.20562	0.997086	0.98058	1.39775	0.643103	761	_	_	_	_	_	_	_	_	_	_	_	_	_	_	_	_	_	_	_	_	_
TRINITY_DN1053_c11_g1	0	3.51742	0.907684	0	3.77949	0	223	_	_	_	_	_	_	_	_	_	_	_	_	_	_	_	_	_	_	_	_	_
TRINITY_DN1053_c12_g1	0.275822	0.207167	0	0.156702	0.386747	0.070392	777	_	_	_	_	_	_	_	_	_	_	_	_	_	_	_	_	_	_	_	_	_
TRINITY_DN1053_c1_g1	0.413018	0.723921	0.374314	0.614202	1.07229	0.729088	9086	XP_037969660.1	XP_037969660.1 uncharacterized protein LOC105381631 [Plutella xylostella]	74.9	_	_	_	_	_	_	_	_	_	_	_	_	_	_	_	m.2994|TRINITY_DN1053_c1_g1:6345-7733(+);m.2993|TRINITY_DN1053_c1_g1:1-3939(+)	complete;5prime_partial	PF05380.10|Peptidase_A17|Pao retrotransposon peptidase|TRINITY_DN1053_c1_g1_i3|m.2993:508-668
TRINITY_DN1053_c1_g2	0	1.00521	0.596915	0.455384	1.56398	1.38	458	_	_	_	_	_	_	_	_	_	_	_	_	_	_	_	_	_	_	_	_	_
TRINITY_DN1053_c2_g1	5.83132	4.71503	4.68693	11.7708	9.79859	8.63717	1027	_	_	_	_	_	_	_	_	_	_	_	_	_	_	_	_	_	_	_	_	_
TRINITY_DN1053_c3_g1	0	0	0	0	0	0	434	_	_	_	_	_	_	_	_	_	_	_	_	_	_	_	_	_	_	_	_	_
TRINITY_DN1053_c4_g1	0.729268	1.13357	0.775072	2.13838	7.88883	1.71444	2698	_	_	_	_	_	_	_	_	_	_	_	_	_	_	_	_	_	_	_	_	_
TRINITY_DN1053_c5_g1	1.03668	1.77073	1.22593	1.56364	1.41504	1.61779	1339	_	_	_	_	_	_	_	_	_	_	_	_	_	_	_	_	_	_	_	_	_
TRINITY_DN1053_c6_g1	3.62643	3.82412	2.60729	4.75537	3.98649	2.65112	3318	_	_	_	_	_	_	_	_	_	_	_	_	_	_	_	_	_	_	_	_	_
TRINITY_DN1053_c7_g1	2.58948	2.23044	1.824	0.797237	2.44941	1.37101	1686	XP_035431908.1	XP_035431908.1 TNF receptor-associated factor 6-like [Spodoptera frugiperda]	98.6	_	_	_	_	_	_	_	_	_	_	_	_	ko:K03175	TRAF6	path:ko04010;path:ko04013;path:ko04064;path:ko04120;path:ko04140;path:ko04144;path:ko04214;path:ko04380;path:ko04620;path:ko04621;path:ko04622;path:ko04657;path:ko04722;path:ko05133;path:ko05140;path:ko05142;path:ko05145;path:ko05152;path:ko05160;path:ko05162;path:ko05168;path:ko05169;path:ko05200;path:ko05222	m.3006|TRINITY_DN1053_c7_g1:191-1444(+)	complete	PF13923.3|zf-C3HC4_2|Zinc finger, C3HC4 type (RING finger)|TRINITY_DN1053_c7_g1_i2|m.3006:35-72;PF00097.22|zf-C3HC4|Zinc finger, C3HC4 type (RING finger)|TRINITY_DN1053_c7_g1_i2|m.3006:36-71;PF15227.3|zf-C3HC4_4|zinc finger of C3HC4-type, RING|TRINITY_DN1053_c7_g1_i2|m.3006:36-67;PF13639.3|zf-RING_2|Ring finger domain|TRINITY_DN1053_c7_g1_i2|m.3006:35-72;PF13920.3|zf-C3HC4_3|Zinc finger, C3HC4 ty…
TRINITY_DN1053_c8_g1	0	0	0.117857	0	0.311642	0.113592	1685	_	_	_	_	_	_	_	_	_	_	_	_	_	_	_	_	_	_	_	_	_
TRINITY_DN1053_c9_g1	0.86964	4.27561	0	3.85299	6.58891	0	201	_	_	_	_	_	_	_	_	_	_	_	_	_	_	_	_	_	_	_	_	_
TRINITY_DN10540_c0_g1	0.749254	0.366313	0.650771	0	0.36698	0.731994	537	_	_	_	_	_	_	_	_	_	_	_	_	_	_	_	_	_	_	_	_	_
TRINITY_DN10541_c0_g1	0	1.49724	0	3.40717	0	2.48443	939	XP_021197843.1	XP_021197843.1 serine/arginine-rich splicing factor 4-like isoform X1 [Helicoverpa armigera]	86.9	_	_	_	_	_	_	_	_	_	_	_	_	_	_	_	m.955|TRINITY_DN10541_c0_g1:92-811(+)	complete	_
TRINITY_DN10542_c0_g1	0.439873	0.320411	0.565697	0.35762	0.478759	0.404313	1089	_	_	_	_	_	_	_	_	_	_	_	_	_	_	_	_	_	_	_	_	_
TRINITY_DN10543_c0_g1	0.090414	0.389704	0.377224	0.381721	0	0.413889	1188	_	_	_	_	_	_	_	_	_	_	_	_	_	_	_	_	_	_	_	_	_
TRINITY_DN10543_c0_g2	0.113619	0	0	0.601444	0	0	1003	_	_	_	_	_	_	_	_	_	_	_	_	_	_	_	_	_	_	_	_	_
TRINITY_DN10543_c0_g3	0.326388	0	0.324239	0.718023	0.26642	0	353	_	_	_	_	_	_	_	_	_	_	_	_	_	_	_	_	_	_	_	_	_
TRINITY_DN10543_c1_g1	0	1.51399	0	1.56931	0.368594	0	315	_	_	_	_	_	_	_	_	_	_	_	_	_	_	_	_	_	_	_	_	_
TRINITY_DN10543_c2_g1	0.067008	0.113996	0.275312	0.047733	0.121744	0	690	_	_	_	_	_	_	_	_	_	_	_	_	_	_	_	_	_	_	_	_	_
TRINITY_DN10544_c0_g1	0.414998	0.320717	0.172517	0.234593	0.768227	0.29819	940	ARI68318.1	ARI68318.1 CYP9A112 [Mythimna separata]	100	sp|Q964T2|CP9E2_BLAGE	sp|Q964T2|CP9E2_BLAGE Cytochrome P450 9e2 OS=Blattella germanica OX=6973 GN=CYP9E2 PE=2 SV=1	66.4	_	_	_	_	_	_		GO:0005789|endoplasmic reticulum membrane	GO:0004497|monooxygenase activity;GO:0005506|iron ion binding;GO:0016705|oxidoreductase activity, acting on paired donors, with incorporation or reduction of molecular oxygen;GO:0020037|heme binding	ko:K15003	CYP9		m.909|TRINITY_DN10544_c0_g1:2-733(+)	5prime_partial	PF00067.19|p450|Cytochrome P450|TRINITY_DN10544_c0_g1_i1|m.909:24-225
TRINITY_DN10545_c0_g1	0	0	0.96291	1.87452	2.61803	1.61922	2656	_	_	_	_	_	_	_	_	_	_	_	_	_	_	_	_	_	_	_	_	_
TRINITY_DN10545_c1_g1	1.27627	0	0	2.30234	0	0	358	_	_	_	_	_	_	_	_	_	_	_	_	_	_	_	_	_	_	_	_	_
TRINITY_DN10545_c1_g2	0	0	0	3.32971	0.669263	0	219	_	_	_	_	_	_	_	_	_	_	_	_	_	_	_	_	_	_	_	_	_
TRINITY_DN10545_c1_g3	1.61808	2.80573	1.30875	0	1.0751	0	352	_	_	_	_	_	_	_	_	_	_	_	_	_	_	_	_	_	_	_	_	_
TRINITY_DN10545_c2_g1	0	0	0.037617	0	0.772842	0.09051	2569	_	_	_	_	_	_	_	_	_	_	_	_	_	_	_	_	_	_	_	_	_
TRINITY_DN10545_c3_g1	0.304667	0.246634	0.30116	0.442985	0.980335	0	363	_	_	_	_	_	_	_	_	_	_	_	_	_	_	_	_	_	_	_	_	_
TRINITY_DN10546_c0_g1	0	1.2637	3.14687	0.689559	0.711687	1.80799	367	_	_	_	_	_	_	_	_	_	_	_	_	_	_	_	_	_	_	_	_	_
TRINITY_DN10546_c1_g1	0.605443	0	0	0.89285	0.494226	0	362	_	_	_	_	_	_	_	_	_	_	_	_	_	_	_	_	_	_	_	_	_
TRINITY_DN10547_c0_g1	0	0	0	0	0	16.3318	348	_	_	_	_	_	_	_	_	_	_	_	_	_	_	_	_	_	_	_	_	_
TRINITY_DN10548_c0_g1	0.297489	0	0.209516	0.48959	0.058885	0.268662	1934	_	_	_	_	_	_	_	_	_	_	_	_	_	_	_	_	_	_	_	_	_
TRINITY_DN10549_c0_g1	0	0.337397	0	0	0.798215	0	792	_	_	_	_	_	_	_	_	_	_	_	_	_	_	_	_	_	_	_	_	_
TRINITY_DN10549_c1_g1	0.131465	0.393146	0	0.614831	0	0.129964	568	_	_	_	_	_	_	_	_	_	_	_	_	_	_	_	_	_	_	m.921|TRINITY_DN10549_c1_g1:1-498(+)	5prime_partial	_
TRINITY_DN10549_c1_g2	0.349194	0.288969	1.04607	0.508803	0	0	345	_	_	_	_	_	_	_	_	_	_	_	_	_	_	_	_	_	_	_	_	_
TRINITY_DN10549_c1_g3	0.331483	0.465634	0.223613	0.240229	0.28372	0.195452	529	_	_	_	_	_	_	_	_	_	_	_	_	_	_	_	_	_	_	m.925|TRINITY_DN10549_c1_g3:229-528(+)	3prime_partial	_
TRINITY_DN10549_c2_g1	0.179056	0.147813	0	0.264978	0	0	433	_	_	_	_	_	_	_	_	_	_	_	_	_	_	_	_	_	_	_	_	_
TRINITY_DN10549_c3_g1	1.46075	0	0	0	0	0	230	XP_035437217.1	XP_035437217.1 uncharacterized protein LOC118267388, partial [Spodoptera frugiperda]	75.8	_	_	_	_	_	_	_	_	_	_	_	_	_	_	_	_	_	_
TRINITY_DN1054_c0_g1	5.49095	0	4.7063	1.79147	2.12742	1.53984	2154	_	_	_	_	_	_	_	_	_	_	_	_	_	_	_	_	_	_	_	_	_
TRINITY_DN1054_c1_g1	1.13089	0.79858	0.711396	0.746303	0.991091	0.541431	5212	KAF9424912.1	KAF9424912.1 hypothetical protein HW555_000213 [Spodoptera exigua]	83.6	_	_	_	_	_	_	_	_	_	_	_	_	ko:K15199	GTF3C1		m.3099|TRINITY_DN1054_c1_g1:62-4693(+)	complete	PF04182.9|B-block_TFIIIC|B-block binding subunit of TFIIIC|TRINITY_DN1054_c1_g1_i1|m.3099:173-246
TRINITY_DN1054_c2_g1	0	0	0	0	0	0	314	_	_	_	_	_	_	_	_	_	_	_	_	_	_	_	_	_	_	_	_	_
TRINITY_DN1054_c3_g1	0.207221	2.01977	0	0	0.171472	0	411	_	_	_	_	_	_	_	_	_	_	_	_	_	_	_	_	_	_	_	_	_
TRINITY_DN1054_c4_g1	0.643152	0.322739	0.258665	0.281817	0.46374	0.226626	494	XP_026488946.1	XP_026488946.1 eukaryotic translation initiation factor 4H-like isoform X4 [Vanessa tameamea]	68.9	_	_	_	_	_	_	_	_	_	_	_	_	_	_	_	_	_	_
TRINITY_DN10550_c0_g1	0	0	0	0.150087	0	0	583	_	_	_	_	_	_	_	_	_	_	_	_	_	_	_	_	_	_	_	_	_
TRINITY_DN10551_c0_g1	0	0	0	0	1.31542	0	1863	XP_022827733.1	XP_022827733.1 lysyl oxidase homolog 3A [Spodoptera litura]	89.4	sp|P16264|SPER_STRPU	sp|P16264|SPER_STRPU Egg peptide speract receptor OS=Strongylocentrotus purpuratus OX=7668 PE=1 SV=1	47.5	_	_	_	_	_	_		GO:0016021|integral component of membrane	GO:0005044|scavenger receptor activity	ko:K00280	LOXL2_3_4		m.960|TRINITY_DN10551_c0_g1:279-1772(+)	complete	PF01186.14|Lysyl_oxidase|Lysyl oxidase|TRINITY_DN10551_c0_g1_i1|m.960:289-493;PF00530.15|SRCR|Scavenger receptor cysteine-rich domain|TRINITY_DN10551_c0_g1_i1|m.960:58-151;PF00530.15|SRCR|Scavenger receptor cysteine-rich domain|TRINITY_DN10551_c0_g1_i1|m.960:189-284
TRINITY_DN10552_c0_g1	0	0.098344	0	0.674422	2.18923	0.306447	518	_	_	_	_	_	_	_	_	_	_	_	_	_	_	_	_	_	_	_	_	_
TRINITY_DN10553_c0_g1	1.39787	1.0909	1.18737	1.72528	2.14349	0.976073	1493	XP_021198030.1	XP_021198030.1 uncharacterized protein LOC110381920 [Helicoverpa armigera]	61.9	_	_	_	_	_	_	_	_	_	_	_	_	_	_	_	m.1035|TRINITY_DN10553_c0_g1:683-1456(+)	complete	PF02892.12|zf-BED|BED zinc finger|TRINITY_DN10553_c0_g1_i1|m.1035:14-54
TRINITY_DN10554_c0_g1	1.47541	0	1.3889	0.686104	0	0	541	_	_	_	_	_	_	_	_	_	_	_	_	_	_	_	_	_	_	_	_	_
TRINITY_DN10555_c0_g1	4.70642	4.55427	0	0	0	2.84033	306	XP_035428785.1	XP_035428785.1 para-nitrobenzyl esterase-like isoform X2 [Spodoptera frugiperda]	83.2	_	_	_	_	_	_	_	_	_	_	_	_	_	_	_	m.911|TRINITY_DN10555_c0_g1:2-304(+)	internal	PF00135.25|COesterase|Carboxylesterase family|TRINITY_DN10555_c0_g1_i1|m.911:12-101
TRINITY_DN10556_c0_g1	0.16581	0.673183	0.674332	0.526484	0.56023	0.238436	795	_	_	_	_	_	_	_	_	_	_	_	_	_	_	_	_	_	_	_	_	_
TRINITY_DN10556_c0_g2	0	0	0	0	3.74254	0	558	_	_	_	_	_	_	_	_	_	_	_	_	_	_	_	_	_	_	_	_	_
TRINITY_DN10556_c0_g3	0.576296	1.07902	1.29744	0.528218	1.88845	1.13851	471	_	_	_	_	_	_	_	_	_	_	_	_	_	_	_	_	_	_	_	_	_
TRINITY_DN10556_c2_g1	0	0	1.13169	1.58565	2.79233	0.421161	293	_	_	_	_	_	_	_	_	_	_	_	_	_	_	_	_	_	_	_	_	_
TRINITY_DN10556_c3_g1	0	0.504037	0	0.455253	0	0	413	_	_	_	_	_	_	_	_	_	_	_	_	_	_	_	_	_	_	_	_	_
TRINITY_DN10556_c4_g1	0.202943	0.33376	0	0	0.168129	0	414	_	_	_	_	_	_	_	_	_	_	_	_	_	_	_	_	_	_	_	_	_
TRINITY_DN10557_c0_g1	0	0	0	1.60412	2.4044	0.956592	432	_	_	_	_	_	_	_	_	_	_	_	_	_	_	_	_	_	_	_	_	_
TRINITY_DN10558_c0_g1	0	8.89395	0	9.71977	0	0	357	_	_	_	_	_	_	_	_	_	_	_	_	_	_	_	_	_	_	_	_	_
TRINITY_DN10559_c0_g1	1.27932	4.09471	8.09432	0	4.41011	0	257	_	_	_	_	_	_	_	_	_	_	_	_	_	_	_	_	_	_	_	_	_
TRINITY_DN1055_c0_g1	0	1.66118	0	0.715288	0.581857	1.61063	7409	KAE9539468.1	KAE9539468.1 hypothetical protein AGLY_004720 [Aphis glycines]	48	_	_	_	_	_	_	_	_	_	_	_	_	_	_	_	_	_	_
TRINITY_DN10560_c0_g1	1.89695	1.02893	1.64671	1.55016	1.80607	2.20698	410	_	_	_	_	_	_	_	_	_	_	_	_	_	_	_	_	_	_	_	_	_
TRINITY_DN10560_c0_g2	0	3.60866	0	5.86664	0	0	251	_	_	_	_	_	_	_	_	_	_	_	_	_	_	_	_	_	_	_	_	_
TRINITY_DN10560_c1_g1	0	0	0	0	0.580638	0	247	_	_	_	_	_	_	_	_	_	_	_	_	_	_	_	_	_	_	_	_	_
TRINITY_DN10561_c0_g1	0	0	0.36608	0	1.46286	1.02416	428	_	_	_	_	_	_	_	_	_	_	_	_	_	_	_	_	_	_	_	_	_
TRINITY_DN10562_c0_g1	4.83038	0	0	4.60295	3.85093	0	261	_	_	_	_	_	_	_	_	_	_	_	_	_	_	_	_	_	_	_	_	_
TRINITY_DN10563_c0_g1	0	0.992128	0	1.09276	0	0.897937	2445	_	_	_	_	_	_	_	_	_	_	_	_	_	_	_	_	_	_	_	_	_
TRINITY_DN10564_c0_g1	0	0	0	0.465084	0.265503	0	738	_	_	_	_	_	_	_	_	_	_	_	_	_	_	_	_	_	_	_	_	_
TRINITY_DN10565_c0_g1	0	0	5.19005	0	3.87272	2.36465	382	_	_	_	_	_	_	_	_	_	_	_	_	_	_	_	_	_	_	_	_	_
TRINITY_DN10566_c0_g1	12.7046	0	0	13.0201	0	0	371	_	_	_	_	_	_	_	_	_	_	_	_	_	_	_	_	_	_	_	_	_
TRINITY_DN10567_c0_g1	4.29893	6.26265	7.1471	5.15408	9.88654	3.8599	378	XP_022819442.1	XP_022819442.1 hemolymph lipopolysaccharide-binding protein-like [Spodoptera litura]	75.6	_	_	_	_	_	_	_	_	_	_	_	_	_	_	_	_	_	_
TRINITY_DN10568_c0_g1	7.03728	0	0	0	14.786	8.00012	246	_	_	_	_	_	_	_	_	_	_	_	_	_	_	_	_	_	_	_	_	_
TRINITY_DN10569_c0_g1	3.59555	0	0	0	0	0.671298	829	_	_	_	_	_	_	_	_	_	_	_	_	_	_	_	_	_	_	_	_	_
TRINITY_DN10569_c0_g2	0	12.764	9.53378	0	0	0	281	_	_	_	_	_	_	_	_	_	_	_	_	_	_	_	_	_	_	_	_	_
TRINITY_DN10569_c1_g1	0	0	0.737969	0.434304	0	0	258	_	_	_	_	_	_	_	_	_	_	_	_	_	_	_	_	_	_	_	_	_
TRINITY_DN1056_c0_g1	5.08778	5.38735	2.31506	3.4048	5.11331	0.920842	2780	AID66647.1	AID66647.1 fatty acyl reductase [Agrotis segetum]	94.7	sp|A1ZAI5|FACR1_DROME	sp|A1ZAI5|FACR1_DROME Putative fatty acyl-CoA reductase CG5065 OS=Drosophila melanogaster OX=7227 GN=CG5065 PE=3 SV=1	62.1	_	_	_	_	_	_	GO:0008611|ether lipid biosynthetic process;GO:0010025|wax biosynthetic process;GO:0035336|long-chain fatty-acyl-CoA metabolic process	GO:0005777|peroxisome;GO:0005778|peroxisomal membrane;GO:0005779|integral component of peroxisomal membrane;GO:0043231|intracellular membrane-bounded organelle	GO:0080019|fatty-acyl-CoA reductase (alcohol-forming) activity;GO:0102965|alcohol-forming fatty acyl-CoA reductase activity	ko:K13356	FAR	path:ko00073;path:ko04146;path:ko04212	m.3007|TRINITY_DN1056_c0_g1:212-1792(+)	complete	PF07993.9|NAD_binding_4|Male sterility protein|TRINITY_DN1056_c0_g1_i1|m.3007:26-295;PF03015.16|Sterile|Male sterility protein|TRINITY_DN1056_c0_g1_i1|m.3007:367-460;PF01370.18|Epimerase|NAD dependent epimerase/dehydratase family|TRINITY_DN1056_c0_g1_i1|m.3007:24-250;PF02719.12|Polysacc_synt_2|Polysaccharide biosynthesis protein|TRINITY_DN1056_c0_g1_i1|m.3007:24-163
TRINITY_DN10570_c0_g1	0	1.33228	0	2.10497	3.37506	0.268893	356	PCG79531.1	PCG79531.1 hypothetical protein B5V51_231 [Heliothis virescens]	89	sp|A8WYE4|PAR1_CAEBR	sp|A8WYE4|PAR1_CAEBR Serine/threonine-protein kinase par-1 OS=Caenorhabditis briggsae OX=6238 GN=par-1 PE=3 SV=1	78.9	_	_	_	_	_	_	GO:0000226|microtubule cytoskeleton organization;GO:0007275|multicellular organism development;GO:0035556|intracellular signal transduction	GO:0005737|cytoplasm;GO:0005938|cell cortex	GO:0004674|protein serine/threonine kinase activity;GO:0005524|ATP binding;GO:0046872|metal ion binding;GO:0050321|tau-protein kinase activity;GO:0106310|protein serine kinase activity;GO:0106311|protein threonine kinase activity	ko:K19009	SIK3		m.999|TRINITY_DN10570_c0_g1:2-355(+)	internal	_
TRINITY_DN10571_c0_g1	0.997257	1.63517	0.245475	0.185303	2.25016	0	386	_	_	_	_	_	_	_	_	_	_	_	_	_	_	_	_	_	_	_	_	_
TRINITY_DN10573_c0_g1	6.79912	3.65939	0	0	0.434872	5.05513	378	_	_	_	_	_	_	_	_	_	_	_	_	_	_	_	_	_	_	_	_	_
TRINITY_DN10574_c0_g1	1.90118	1.42277	0	1.12343	0.117086	0.177715	2034	XP_021190916.1	XP_021190916.1 actin-related protein 8 [Helicoverpa armigera]	99.3	sp|Q0IEG8|ARP8_AEDAE	sp|Q0IEG8|ARP8_AEDAE Actin-related protein 8 OS=Aedes aegypti OX=7159 GN=Arp8 PE=3 SV=1	71.4	_	_	_	_	_	_	GO:0006281|DNA repair;GO:0006310|DNA recombination;GO:0006338|chromatin remodeling;GO:0006355|regulation of transcription, DNA-templated	GO:0031011|Ino80 complex	GO:0005524|ATP binding	ko:K11673	ACTR8, ARP8, INO80N		m.1017|TRINITY_DN10574_c0_g1:164-1855(+)	complete	PF00022.16|Actin|Actin|TRINITY_DN10574_c0_g1_i7|m.1017:22-293;PF00022.16|Actin|Actin|TRINITY_DN10574_c0_g1_i7|m.1017:446-558
TRINITY_DN10574_c1_g1	0	0	0	0.418619	0.156514	0.203746	686	_	_	_	_	_	_	_	_	_	_	_	_	_	_	_	_	_	_	_	_	_
TRINITY_DN10574_c2_g1	2.46849	0	0	0	0	0	209	_	_	_	_	_	_	_	_	_	_	_	_	_	_	_	_	_	_	_	_	_
TRINITY_DN10574_c2_g2	2.5447	0	0.824332	0.962353	0	0	240	_	_	_	_	_	_	_	_	_	_	_	_	_	_	_	_	_	_	_	_	_
TRINITY_DN10574_c3_g1	0.639199	0.794761	0.318329	0.122955	0	0	452	_	_	_	_	_	_	_	_	_	_	_	_	_	_	_	_	_	_	_	_	_
TRINITY_DN10574_c4_g1	0	0.51957	0.938477	0.464113	0	0	357	_	_	_	_	_	_	_	_	_	_	_	_	_	_	_	_	_	_	_	_	_
TRINITY_DN10575_c0_g1	1.38999	0.697342	0.663741	4.05141	0.231583	1.08085	370	_	_	_	_	_	_	_	_	_	_	_	_	_	_	_	_	_	_	_	_	_
TRINITY_DN10576_c0_g1	4.92237	0	0	2.37183	5.08	1.712	282	_	_	_	_	_	_	_	_	_	_	_	_	_	_	_	_	_	_	_	_	_
TRINITY_DN10577_c0_g1	1.68112	0	1.00633	0.615099	0	0	206	_	_	_	_	_	_	_	_	_	_	_	_	_	_	_	_	_	_	_	_	_
TRINITY_DN10577_c0_g2	0.435852	1.49232	0	1.23144	1.43947	0.358487	318	_	_	_	_	_	_	_	_	_	_	_	_	_	_	_	_	_	_	_	_	_
TRINITY_DN10577_c0_g3	0.307758	0	0.304613	0	0.251231	0	360	_	_	_	_	_	_	_	_	_	_	_	_	_	_	_	_	_	_	_	_	_
TRINITY_DN10577_c1_g1	0	5.83333	3.32751	0	0	1.24891	295	_	_	_	_	_	_	_	_	_	_	_	_	_	_	_	_	_	_	_	_	_
TRINITY_DN10578_c0_g1	0.197517	0.209667	0.038682	0.047778	0.136546	0.20185	1761	_	_	_	_	_	_	_	_	_	_	_	_	_	_	_	_	_	_	_	_	_
TRINITY_DN10578_c0_g2	3.05831	2.23367	2.72712	2.99828	2.78663	1.73629	348	_	_	_	_	_	_	_	_	_	_	_	_	_	_	_	_	_	_	_	_	_
TRINITY_DN10578_c0_g3	0.322862	1.53177	0	2.27951	0.238706	1.52712	1297	_	_	_	_	_	_	_	_	_	_	_	_	_	_	_	_	_	_	_	_	_
TRINITY_DN10578_c1_g1	0	0.632138	0	0	0.621836	0	335	_	_	_	_	_	_	_	_	_	_	_	_	_	_	_	_	_	_	_	_	_
TRINITY_DN10579_c0_g1	0	0	0	0	1.67601	0.562007	540	_	_	_	_	_	_	_	_	_	_	_	_	_	_	_	_	_	_	_	_	_
TRINITY_DN1057_c0_g1	0.930399	0	0	0	12.1156	2.42017	3600	_	_	_	_	_	_	_	_	_	_	_	_	_	_	_	_	_	_	_	_	_
TRINITY_DN1057_c2_g1	1.23411	1.04758	0.553139	0.907438	1.10465	0.274924	636	_	_	_	_	_	_	_	_	_	_	_	_	_	_	_	_	_	_	_	_	_
TRINITY_DN1057_c3_g1	0	0.160388	0.192556	0.551791	0	0.452679	420	_	_	_	_	_	_	_	_	_	_	_	_	_	_	_	_	_	_	_	_	_
TRINITY_DN10580_c0_g1	13.3005	0	7.93667	5.19975	0	3.33379	228	_	_	_	_	_	_	_	_	_	_	_	_	_	_	_	_	_	_	_	_	_
TRINITY_DN10581_c0_g1	0	0	0.087134	2.1452	0.573614	0.752659	1594	_	_	_	_	_	_	_	_	_	_	_	_	_	_	_	_	_	_	_	_	_
TRINITY_DN10582_c0_g1	34.9143	17.929	0	23.9826	0	0	292	_	_	_	_	_	_	_	_	_	_	_	_	_	_	_	_	_	_	_	_	_
TRINITY_DN10583_c0_g1	0.178398	0.013661	0	0.520999	0	0.028064	2294	XP_021196139.1	XP_021196139.1 nose resistant to fluoxetine protein 6-like [Helicoverpa armigera]	81.4	_	_	_	_	_	_	_	_	_	_	_	_	_	_	_	m.1009|TRINITY_DN10583_c0_g1:432-2276(+)	complete	PF01757.19|Acyl_transf_3|Acyltransferase family|TRINITY_DN10583_c0_g1_i1|m.1009:214-601
TRINITY_DN10583_c0_g2	0	0.985506	0	0	0	0	283	XP_022831914.1	XP_022831914.1 uncharacterized protein LOC111360260 [Spodoptera litura]	77.6	_	_	_	_	_	_	_	_	_	_	_	_	_	_	_	_	_	_
TRINITY_DN10584_c0_g1	1.48354	1.53809	1.23371	0.632309	1.42247	0.659523	925	_	_	_	_	_	_	_	_	_	_	_	_	_	_	_	ko:K15003	CYP9		m.905|TRINITY_DN10584_c0_g1:2-454(+)	5prime_partial	_
TRINITY_DN10585_c0_g1	0.08013	0.83406	0.084183	0.832	0.102183	0.558909	2667	PCG76915.1	PCG76915.1 hypothetical protein B5V51_8441 [Heliothis virescens]	94.4	_	_	_	_	_	_	_	_	_	_	_	_	_	_	_	m.1000|TRINITY_DN10585_c0_g1:87-2507(+)	complete	PF00566.15|RabGAP-TBC|Rab-GTPase-TBC domain|TRINITY_DN10585_c0_g1_i1|m.1000:442-599
TRINITY_DN10586_c0_g1	16.3768	14.9982	12.7263	8.44417	13.0689	4.95311	1585	XP_022825830.1	XP_022825830.1 uncharacterized protein LOC111355935 [Spodoptera litura]	98.3	_	_	_	_	_	_	_	_	_	_	_	_	_	_	_	m.903|TRINITY_DN10586_c0_g1:185-886(+)	complete	_
TRINITY_DN10587_c0_g1	0.098007	0.242596	0.058778	0.470095	0.212239	0.139167	2232	XP_021188299.1	XP_021188299.1 MRN complex-interacting protein [Helicoverpa armigera]	67.2	_	_	_	_	_	_	_	_	_	_	_	_	_	_	_	m.1005|TRINITY_DN10587_c0_g1:337-2055(+)	complete	_
TRINITY_DN10588_c0_g1	2.17898	3.61193	2.64735	3.30193	5.99826	2.86995	421	PZC72650.1	PZC72650.1 hypothetical protein B5X24_HaOG210780 [Helicoverpa armigera]	81	_	_	_	_	_	_	_	_	_	_	_	_	_	_	_	_	_	_
TRINITY_DN10588_c0_g2	4.10114	5.99083	4.68419	6.7159	2.97182	5.20679	348	PZC72650.1	PZC72650.1 hypothetical protein B5X24_HaOG210780 [Helicoverpa armigera]	81.5	_	_	_	_	_	_	_	_	_	_	_	_	_	_	_	_	_	_
TRINITY_DN10588_c1_g1	1.34211	4.3367	0	1.89159	2.32255	0.527448	247	_	_	_	_	_	_	_	_	_	_	_	_	_	_	_	_	_	_	_	_	_
TRINITY_DN10588_c1_g2	0.089693	0.15522	0.034979	0.138228	0.079847	0.064783	1804	_	_	_	_	_	_	_	_	_	_	_	_	_	_	_	_	_	_	_	_	_
TRINITY_DN10588_c1_g3	1.66912	3.09756	0	0	0	0.66538	207	_	_	_	_	_	_	_	_	_	_	_	_	_	_	_	_	_	_	_	_	_
TRINITY_DN10588_c2_g1	0	0	0	0	3.22322	0	306	_	_	_	_	_	_	_	_	_	_	_	_	_	_	_	_	_	_	_	_	_
TRINITY_DN10588_c3_g1	0	0	0.255238	0.092467	0.323563	0	497	_	_	_	_	_	_	_	_	_	_	_	_	_	_	_	_	_	_	_	_	_
TRINITY_DN10589_c0_g1	0	0.277576	0	0.200007	0	0.21117	1079	PCG76280.1	PCG76280.1 hypothetical protein B5V51_9875 [Heliothis virescens]	72.6	_	_	_	_	_	_	_	_	_	_	_	_	_	_	_	_	_	_
TRINITY_DN1058_c0_g1	5.38834	5.39337	4.23639	5.09057	5.00119	3.50209	1464	PZC79189.1	PZC79189.1 hypothetical protein B5X24_HaOG216753 [Helicoverpa armigera]	95.9	_	_	_	_	_	_	_	_	_	_	_	_	ko:K18633	MZT1, GIP1, GIP2		_	_	_
TRINITY_DN1058_c1_g1	1.23117	3.25818	3.33562	0	0	0	238	_	_	_	_	_	_	_	_	_	_	_	_	_	_	_	_	_	_	_	_	_
TRINITY_DN1058_c2_g1	0	0	0	0	0	0.63482	202	_	_	_	_	_	_	_	_	_	_	_	_	_	_	_	_	_	_	_	_	_
TRINITY_DN10590_c0_g1	1.83875	1.86785	1.29199	1.05128	2.02613	0.951762	1431	XP_021191592.1	XP_021191592.1 protein tramtrack, beta isoform-like isoform X13 [Helicoverpa armigera]	92.4	_	_	_	_	_	_	_	_	_	_	_	_	_	_	_	m.1003|TRINITY_DN10590_c0_g1:3-401(+)	5prime_partial	PF04500.13|FLYWCH|FLYWCH zinc finger domain|TRINITY_DN10590_c0_g1_i1|m.1003:29-87
TRINITY_DN10591_c0_g1	0.096787	0.110884	0.105153	0	0.104167	0	3680	CAB3220051.1	CAB3220051.1 unnamed protein product [Arctia plantaginis]	83.8	_	_	_	_	_	_	_	_	_	_	_	_	_	_	_	_	_	_
TRINITY_DN10592_c0_g1	5.15309	4.02509	1.04474	2.20733	1.93411	1.366	742	_	_	_	_	_	_	_	_	_	_	_	_	_	_	_	_	_	_	m.966|TRINITY_DN10592_c0_g1:3-410(+)	5prime_partial	_
TRINITY_DN10593_c0_g1	0	0.744749	0	0.783332	0	0.679437	5538	CAD7609486.1	CAD7609486.1 unnamed protein product, partial [Timema genevievae]	67.7	_	_	_	_	_	_	_	_	_	_	_	_	_	_	_	_	_	_
TRINITY_DN10594_c0_g1	0.390153	0	0	0.197639	0	0.153761	992	_	_	_	_	_	_	_	_	_	_	_	_	_	_	_	_	_	_	_	_	_
TRINITY_DN10594_c1_g1	0	0	1.6974	0	0	0	235	_	_	_	_	_	_	_	_	_	_	_	_	_	_	_	_	_	_	_	_	_
TRINITY_DN10595_c0_g1	30.2023	1.48301	23.891	0.690077	1.07351	26.7908	355	PCG68541.1	PCG68541.1 hypothetical protein B5V51_5118 [Heliothis virescens]	100	_	_	_	_	_	_	_	_	_	_	_	_	ko:K11262	ACACA	path:ko00061;path:ko00254;path:ko00620;path:ko00640;path:ko01100;path:ko01110;path:ko01212;path:ko04152;path:ko04910;path:ko04922	m.910|TRINITY_DN10595_c0_g1:1-354(+)	internal	PF01039.19|Carboxyl_trans|Carboxyl transferase domain|TRINITY_DN10595_c0_g1_i2|m.910:2-118
TRINITY_DN10596_c0_g1	0.456008	0.433738	0.524253	0.251607	0.400351	0.136232	821	XP_026330153.1	XP_026330153.1 protein tramtrack, beta isoform isoform X41 [Hyposmocoma kahamanoa]	72.7	_	_	_	_	_	_	_	_	_	_	_	_	_	_	_	_	_	_
TRINITY_DN10597_c0_g1	0	0.996628	0.369803	1.33168	0	0	583	_	_	_	_	_	_	_	_	_	_	_	_	_	_	_	_	_	_	_	_	_
TRINITY_DN10597_c1_g1	0	0.291561	0	0	0	0	344	_	_	_	_	_	_	_	_	_	_	_	_	_	_	_	_	_	_	_	_	_
TRINITY_DN10597_c1_g2	0	0.409301	1.00418	0	0	0	306	_	_	_	_	_	_	_	_	_	_	_	_	_	_	_	_	_	_	_	_	_
TRINITY_DN10597_c2_g1	0.821234	1.38578	4.19732	0.431944	1.63583	0.498787	259	_	_	_	_	_	_	_	_	_	_	_	_	_	_	_	_	_	_	_	_	_
TRINITY_DN10598_c0_g1	1.99403	2.61626	1.57386	1.8487	3.43594	3.17214	2410	_	_	_	_	_	_	_	_	_	_	_	_	_	_	_	_	_	_	_	_	_
TRINITY_DN10598_c1_g1	0	0.456358	0	0.632386	0	0.760066	1555	_	_	_	_	_	_	_	_	_	_	_	_	_	_	_	_	_	_	_	_	_
TRINITY_DN10598_c2_g1	2.7374	0	0	0.940834	0.586449	0	245	_	_	_	_	_	_	_	_	_	_	_	_	_	_	_	_	_	_	_	_	_
TRINITY_DN10598_c2_g2	0.204351	0.168012	0	0	0.338465	0	413	_	_	_	_	_	_	_	_	_	_	_	_	_	_	_	_	_	_	_	_	_
TRINITY_DN10598_c3_g1	1.89474	0.725349	1.54063	0.820913	0.93512	1.26477	335	_	_	_	_	_	_	_	_	_	_	_	_	_	_	_	_	_	_	_	_	_
TRINITY_DN10599_c0_g1	2.92933	1.33908	1.26359	2.38038	3.41072	0.5426	323	PCG75287.1	PCG75287.1 hypothetical protein B5V51_11959 [Heliothis virescens]	92.5	_	_	_				COG0383	KOG1959	_	_	_	_	ko:K12311	MAN2B1, LAMAN	path:ko00511;path:ko04142	m.982|TRINITY_DN10599_c0_g1:3-323(+)	internal	PF01074.19|Glyco_hydro_38|Glycosyl hydrolases family 38 N-terminal domain|TRINITY_DN10599_c0_g1_i1|m.982:3-106
TRINITY_DN1059_c0_g1	8.51622	6.81912	8.1856	5.5638	26.1867	3.69893	2545	KOB67513.1	KOB67513.1 Uncharacterized protein OBRU01_19904 [Operophtera brumata]	78.2	_	_	_	_	_	_	_	_	_	_	_	_	_	_	_	_	_	_
TRINITY_DN105_c0_g1	9.14167	4.18943	3.58089	1.84706	5.84723	2.85184	2005	XP_021201132.1	XP_021201132.1 synaptotagmin-4 [Helicoverpa armigera]	95.2	sp|P34693|SYT1_CAEEL	sp|P34693|SYT1_CAEEL Synaptotagmin-1 OS=Caenorhabditis elegans OX=6239 GN=snt-1 PE=2 SV=1	64	_	_	_	_	_	_	GO:0007626|locomotory behavior;GO:0010940|positive regulation of necrotic cell death;GO:0012501|programmed cell death;GO:0014059|regulation of dopamine secretion;GO:0016079|synaptic vesicle exocytosis;GO:0016192|vesicle-mediated transport;GO:0017156|calcium-ion regulated exocytosis;GO:0017158|regulation of calcium ion-dependent exocytosis;GO:0030421|defecation;GO:0043051|regulation of pharyngeal …	GO:0005886|plasma membrane;GO:0008021|synaptic vesicle;GO:0016021|integral component of membrane;GO:0030424|axon;GO:0030672|synaptic vesicle membrane;GO:0031045|dense core granule;GO:0045202|synapse;GO:0070382|exocytic vesicle	GO:0000149|SNARE binding;GO:0001786|phosphatidylserine binding;GO:0005509|calcium ion binding;GO:0005544|calcium-dependent phospholipid binding;GO:0019905|syntaxin binding;GO:0030276|clathrin binding	ko:K19904	SYT4		m.1083|TRINITY_DN105_c0_g1:209-1528(+)	complete	PF00168.27|C2|C2 domain|TRINITY_DN105_c0_g1_i2|m.1083:182-278;PF00168.27|C2|C2 domain|TRINITY_DN105_c0_g1_i2|m.1083:315-410
TRINITY_DN105_c0_g2	0.534913	0.908085	0.669928	0.439123	0.752381	0.643557	1103	ABO45233.1	ABO45233.1 reverse transcriptase [Ostrinia nubilalis]	78.8	_	_	_	_	_	_	_	_	_	_	_	_	_	_	_	m.1099|TRINITY_DN105_c0_g2:404-868(+)	complete	_
TRINITY_DN105_c13_g1	0	0.601649	0	0	0	0	252	_	_	_	_	_	_	_	_	_	_	_	_	_	_	_	_	_	_	_	_	_
TRINITY_DN105_c14_g1	0	33.8465	11.0151	25.9207	20.5085	0	221	_	_	_	_	_	_	_	_	_	_	_	_	_	_	_	_	_	_	_	_	_
TRINITY_DN105_c15_g1	0	0	0	0	0	0	221	_	_	_	_	_	_	_	_	_	_	_	_	_	_	_	_	_	_	_	_	_
TRINITY_DN105_c1_g1	0	0.419477	0	0	0	3.68635	1445	_	_	_	_	_	_	_	_	_	_	_	_	_	_	_	_	_	_	_	_	_
TRINITY_DN105_c1_g2	0	2.03341	0	0	1.89483	0	230	_	_	_	_	_	_	_	_	_	_	_	_	_	_	_	_	_	_	_	_	_
TRINITY_DN105_c1_g3	57.2965	193.174	125.811	359.506	1491.72	322.265	2479	_	_	_	_	_	_	_	_	_	_	_	_	_	_	_	_	_	_	_	_	_
TRINITY_DN105_c2_g1	0	0	0	7.64279	0	0	1964	_	_	_	_	_	_	_	_	_	_	_	_	_	_	_	_	_	_	_	_	_
TRINITY_DN105_c3_g1	8.75201	5.52621	0	11.2159	4.55245	0	453	_	_	_	_	_	_	_	_	_	_	_	_	_	_	_	_	_	_	_	_	_
TRINITY_DN105_c3_g2	31.5784	27.9194	78.6798	29.9559	14.8737	40.8304	454	KPJ01280.1	KPJ01280.1 hypothetical protein RR46_01415 [Papilio xuthus]	69.2	_	_	_	_	_	_	_	_	_	_	_	_	_	_	_	_	_	_
TRINITY_DN105_c4_g1	0	0	0.245632	0.443173	0.377373	0.072619	1125	_	_	_	_	_	_	_	_	_	_	_	_	_	_	_	_	_	_	_	_	_
TRINITY_DN105_c5_g1	0	0	0	0.604103	0	0.155131	496	KAF9822543.1	KAF9822543.1 hypothetical protein SFRURICE_010658 [Spodoptera frugiperda]	90.9	_	_	_	_	_	_	_	_	_	_	_	_	_	_	_	_	_	_
TRINITY_DN105_c5_g2	6.08754	0	0	3.21082	0	0	201	_	_	_	_	_	_	_	_	_	_	_	_	_	_	_	_	_	_	_	_	_
TRINITY_DN105_c6_g1	0.736391	0	0	0.405624	1.24326	0.591003	225	_	_	_	_	_	_	_	_	_	_	_	_	_	_	_	_	_	_	_	_	_
TRINITY_DN10600_c0_g1	0.18328	0.303002	0.184429	0.222473	0.292072	0.100944	3708	_	_	_	_	_	_	_	_	_	_	_	_	_	_	_	_	_	_	_	_	_
TRINITY_DN10601_c0_g1	2.15523	1.32122	1.2844	0.647539	0.850602	0.513313	1141	XP_022824657.1	XP_022824657.1 40S ribosomal protein S6 [Spodoptera litura]	99.2	sp|Q95V32|RS6_SPOFR	sp|Q95V32|RS6_SPOFR 40S ribosomal protein S6 OS=Spodoptera frugiperda OX=7108 GN=RpS6 PE=2 SV=1	99.6	_	_	_	_	_	_	GO:0006412|translation	GO:0005840|ribosome	GO:0003735|structural constituent of ribosome	ko:K02991	RP-S6e, RPS6	path:ko01521;path:ko03010;path:ko04066;path:ko04150;path:ko04151;path:ko04371;path:ko04910;path:ko05205	m.1033|TRINITY_DN10601_c0_g1:432-1100(+)	complete	PF01092.16|Ribosomal_S6e|Ribosomal protein S6e|TRINITY_DN10601_c0_g1_i2|m.1033:1-95
TRINITY_DN10602_c0_g1	0	0	0.80518	0	0	0	244	_	_	_	_	_	_	_	_	_	_	_	_	_	_	_	_	_	_	_	_	_
TRINITY_DN10602_c0_g2	0	0.971228	0.234323	0	0	0	392	_	_	_	_	_	_	_	_	_	_	_	_	_	_	_	_	_	_	_	_	_
TRINITY_DN10602_c1_g1	0.565215	0.628748	0.575213	0.72053	1.11807	0.572101	622	_	_	_	_	_	_	_	_	_	_	_	_	_	_	_	_	_	_	_	_	_
TRINITY_DN10602_c2_g1	9.17921	6.63274	7.19783	2.67204	6.84338	4.31684	327	_	_	_	_	_	_	_	_	_	_	_	_	_	_	_	_	_	_	_	_	_
TRINITY_DN10602_c2_g2	0	0	1.48585	0	0	0	257	_	_	_	_	_	_	_	_	_	_	_	_	_	_	_	_	_	_	_	_	_
TRINITY_DN10602_c3_g1	1.12282	0	0	0	0	0.452364	278	_	_	_	_	_	_	_	_	_	_	_	_	_	_	_	_	_	_	_	_	_
TRINITY_DN10602_c3_g2	0.480623	0	0	0	0	0	305	_	_	_	_	_	_	_	_	_	_	_	_	_	_	_	_	_	_	_	_	_
TRINITY_DN10602_c4_g1	0.996562	1.47136	0	0.823156	0	0.296718	693	_	_	_	_	_	_	_	_	_	_	_	_	_	_	_	_	_	_	_	_	_
TRINITY_DN10602_c5_g1	0.868236	1.03015	1.13109	0.565311	0.273966	0.351456	628	_	_	_	_	_	_	_	_	_	_	_	_	_	_	_	_	_	_	_	_	_
TRINITY_DN10602_c6_g1	0	0	0	0	2.3539	0	567	PZC85989.1	PZC85989.1 hypothetical protein B5X24_HaOG214354 [Helicoverpa armigera]	42.1	_	_	_	_	_	_	_	_	_	_	_	_	_	_	_	m.1047|TRINITY_DN10602_c6_g1:209-565(+)	3prime_partial	_
TRINITY_DN10602_c7_g1	0.104587	0.616096	0	0.226885	0.089733	0.185238	543	_	_	_	_	_	_	_	_	_	_	_	_	_	_	_	_	_	_	_	_	_
TRINITY_DN10602_c8_g1	0.157388	0.267043	0.161132	0	0	0.140185	629	_	_	_	_	_	_	_	_	_	_	_	_	_	_	_	_	_	_	_	_	_
TRINITY_DN10603_c0_g1	11.227	9.38021	0	3.14846	11.6402	0	303	XP_022819319.1	XP_022819319.1 hemocytin [Spodoptera litura]	83.8	sp|P98092|HMCT_BOMMO	sp|P98092|HMCT_BOMMO Hemocytin OS=Bombyx mori OX=7091 PE=2 SV=1	71	_	_	_	_	_	_	GO:0007155|cell adhesion		GO:0030246|carbohydrate binding	ko:K03900	VWF	path:ko04151;path:ko04510;path:ko04512;path:ko04610;path:ko04611	m.1048|TRINITY_DN10603_c0_g1:2-301(+)	internal	_
TRINITY_DN10604_c0_g1	1.33532	0	0.502706	0.52201	0	0.302395	4448	XP_021190187.1	XP_021190187.1 breast cancer type 1 susceptibility protein-like isoform X1 [Helicoverpa armigera]	81.4	_	_	_	_	_	_	_	_	_	_	_	_	ko:K10605	BRCA1	path:ko01524;path:ko03440;path:ko03460;path:ko04120;path:ko04151;path:ko05206;path:ko05224	m.1064|TRINITY_DN10604_c0_g1:297-4043(+)	complete	PF00533.23|BRCT|BRCA1 C Terminus (BRCT) domain|TRINITY_DN10604_c0_g1_i1|m.1064:1045-1091
TRINITY_DN10604_c0_g2	0	0	0	1.79773	0.695018	0.348385	322	XP_037974815.1	XP_037974815.1 breast cancer type 1 susceptibility protein homolog [Plutella xylostella]	93.9	_	_	_	_	_	_	_	_	_	_	_	_	ko:K10605	BRCA1	path:ko01524;path:ko03440;path:ko03460;path:ko04120;path:ko04151;path:ko05206;path:ko05224	_	_	_
TRINITY_DN10605_c0_g1	0	0	4.05955	0	3.94571	1.56074	481	_	_	_	_	_	_	_	_	_	_	_	_	_	_	_	_	_	_	_	_	_
TRINITY_DN10606_c0_g1	0.485582	0.719349	0	0.922721	0.33618	0.379505	471	_	_	_	_	_	_	_	_	_	_	_	_	_	_	_	_	_	_	_	_	_
TRINITY_DN10607_c0_g1	0.132792	0.241733	0.204488	0.273356	0.312566	0.050143	1380	_	_	_	_	_	_	_	_	_	_	_	_	_	_	_	_	_	_	_	_	_
TRINITY_DN10608_c0_g1	0.706881	1.75243	1.40757	1.38959	0.287746	0	344	_	_	_	_	_	_	_	_	_	_	_	_	_	_	_	_	_	_	_	_	_
TRINITY_DN10609_c0_g1	0	0	2.81803	2.11309	3.26836	0	369	_	_	_	_	_	_	_	_	_	_	_	_	_	_	_	_	_	_	_	_	_
TRINITY_DN1060_c0_g1	2.45034	1.20836	1.38303	0.407998	0	0.207217	2536	XP_035443528.1	XP_035443528.1 membrane-bound alkaline phosphatase-like isoform X1 [Spodoptera frugiperda]	53.9	sp|P29523|PPB_BOMMO	sp|P29523|PPB_BOMMO Membrane-bound alkaline phosphatase OS=Bombyx mori OX=7091 GN=Alp-m PE=1 SV=4	47.8	_	_	_	_	_	_		GO:0005886|plasma membrane;GO:0031225|anchored component of membrane	GO:0004035|alkaline phosphatase activity;GO:0046872|metal ion binding	ko:K01077	E3.1.3.1, phoA, phoB	path:ko00627;path:ko00730;path:ko00790;path:ko01100;path:ko01120;path:ko02020	m.362|TRINITY_DN1060_c0_g1:1-462(+);m.361|TRINITY_DN1060_c0_g1:1639-2334(+)	5prime_partial;complete	PF00245.17|Alk_phosphatase|Alkaline phosphatase|TRINITY_DN1060_c0_g1_i14|m.361:1-199;PF00245.17|Alk_phosphatase|Alkaline phosphatase|TRINITY_DN1060_c0_g1_i14|m.362:19-132
TRINITY_DN1060_c0_g2	2.15786	59.4058	6.80638	5.77312	59.9405	33.9349	1711	ALK86921.1	ALK86921.1 alkaline phosphatase [Spodoptera exigua]	83.8	sp|P29523|PPB_BOMMO	sp|P29523|PPB_BOMMO Membrane-bound alkaline phosphatase OS=Bombyx mori OX=7091 GN=Alp-m PE=1 SV=4	76.7	_	_	_	_	_	_		GO:0005886|plasma membrane;GO:0031225|anchored component of membrane	GO:0004035|alkaline phosphatase activity;GO:0046872|metal ion binding	ko:K01077	E3.1.3.1, phoA, phoB	path:ko00627;path:ko00730;path:ko00790;path:ko01100;path:ko01120;path:ko02020	m.365|TRINITY_DN1060_c0_g2:2-1618(+)	5prime_partial	PF00245.17|Alk_phosphatase|Alkaline phosphatase|TRINITY_DN1060_c0_g2_i2|m.365:64-504;PF01676.15|Metalloenzyme|Metalloenzyme superfamily|TRINITY_DN1060_c0_g2_i2|m.365:318-395
TRINITY_DN1060_c0_g3	0	0.554359	0	0.255207	0	0.263736	803	_	_	_	_	_	_	_	_	_	_	_	_	_	_	_	_	_	_	_	_	_
TRINITY_DN1060_c1_g1	0	0	0	0	0	0	249	_	_	_	_	_	_	_	_	_	_	_	_	_	_	_	_	_	_	_	_	_
TRINITY_DN10610_c0_g1	0.071201	0.357371	0	0	0.253524	0	2497	PCG72845.1	PCG72845.1 hypothetical protein B5V51_429 [Heliothis virescens]	79.5	_	_	_	_	_	_	_	_	_	_	_	_	_	_	_	m.1127|TRINITY_DN10610_c0_g1:133-1002(+)	complete	PF07574.10|SMC_Nse1|Nse1 non-SMC component of SMC5-6 complex|TRINITY_DN10610_c0_g1_i3|m.1127:7-161
TRINITY_DN10611_c0_g1	8.70328	8.92532	6.77013	7.17844	3.63291	5.39142	5757	PCG73718.1	PCG73718.1 hypothetical protein B5V51_14519 [Heliothis virescens]	96	_	_	_	_	_	_	_	_	_	_	_	_	ko:K20840	SLC46A3		m.1049|TRINITY_DN10611_c0_g1:202-1647(+)	complete	PF07690.13|MFS_1|Major Facilitator Superfamily|TRINITY_DN10611_c0_g1_i1|m.1049:74-418
TRINITY_DN10611_c1_g1	0	0.727418	0.291632	0.218097	0.24113	0.752296	365	_	_	_	_	_	_	_	_	_	_	_	_	_	_	_	_	_	_	_	_	_
TRINITY_DN10611_c3_g1	6.13843	4.72445	5.16196	4.12205	4.54	3.48446	1739	KAF9414095.1	KAF9414095.1 hypothetical protein HW555_007854 [Spodoptera exigua]	98.2	sp|Q9V6U8|UBA3_DROME	sp|Q9V6U8|UBA3_DROME Nedd8-activating enzyme E1 catalytic subunit OS=Drosophila melanogaster OX=7227 GN=Uba3 PE=1 SV=1	79.1	_	_	_	_	_	_	GO:0032446|protein modification by small protein conjugation;GO:0045116|protein neddylation;GO:0045879|negative regulation of smoothened signaling pathway;GO:0045880|positive regulation of smoothened signaling pathway	GO:0005634|nucleus;GO:0005737|cytoplasm;GO:0032991|protein-containing complex	GO:0005524|ATP binding;GO:0019781|NEDD8 activating enzyme activity	ko:K10686	UBE1C, UBA3	path:ko04120	m.1051|TRINITY_DN10611_c3_g1:153-1508(+)	complete	PF00899.18|ThiF|ThiF family|TRINITY_DN10611_c3_g1_i1|m.1051:48-342;PF08825.7|E2_bind|E2 binding domain|TRINITY_DN10611_c3_g1_i1|m.1051:355-441
TRINITY_DN10611_c3_g2	0.189005	0.074922	0.134038	0.614321	0.550968	0.243696	2609	XP_022836549.1	XP_022836549.1 nudix hydrolase 8-like, partial [Spodoptera litura]	94.3	_	_	_	_	_	_	_	_	_	_	_	_	_	_	_	m.1055|TRINITY_DN10611_c3_g2:523-1080(+)	complete	PF00293.25|NUDIX|NUDIX domain|TRINITY_DN10611_c3_g2_i7|m.1055:21-134
TRINITY_DN10611_c4_g1	0	3.45952	1.2605	0.587015	2.22381	0.340838	325	XP_026730870.1	XP_026730870.1 uncharacterized protein K02A2.6-like [Trichoplusia ni]	91.9	_	_	_	_	_	_	_	_	_	_	_	_	_	_	_	_	_	_
TRINITY_DN10612_c0_g1	23.6658	23.9683	11.9642	32.2264	0	35.1627	344	_	_	_	_	_	_	_	_	_	_	_	_	_	_	_	_	_	_	_	_	_
TRINITY_DN10613_c0_g1	31.3692	0	18.485	19.8492	17.9473	37.0689	356	XP_026733693.1	XP_026733693.1 fibulin-1-like isoform X2 [Trichoplusia ni]	80.8	_	_	_	_	_	_	_	_	_	_	_	_	ko:K17307	FBLN1_2		m.1119|TRINITY_DN10613_c0_g1:2-355(+)	internal	PF07645.12|EGF_CA|Calcium-binding EGF domain|TRINITY_DN10613_c0_g1_i1|m.1119:87-116
TRINITY_DN10615_c0_g1	2.33921	2.82341	2.28938	1.56151	1.86854	0	393	_	_	_	_	_	_	_	_	_	_	_	_	_	_	_	_	_	_	_	_	_
TRINITY_DN10615_c2_g1	0	0	0	0.974711	0	0	238	_	_	_	_	_	_	_	_	_	_	_	_	_	_	_	_	_	_	_	_	_
TRINITY_DN10615_c3_g1	0.719003	0	0.858227	0.50309	0.622042	0	233	_	_	_	_	_	_	_	_	_	_	_	_	_	_	_	_	_	_	_	_	_
TRINITY_DN10616_c0_g1	1.17081	0.837882	1.34947	0.581373	1.42756	0.464869	383	_	_	_	_	_	_	_	_	_	_	_	_	_	_	_	_	_	_	_	_	_
TRINITY_DN10616_c0_g2	1.16476	0.461524	0.738349	1.41443	0.472989	0.129922	1149	_	_	_	_	_	_	_	_	_	_	_	_	_	_	_	_	_	_	_	_	_
TRINITY_DN10616_c0_g3	1.34631	0.207387	0.50017	0.885725	0.139202	0	617	_	_	_	_	_	_	_	_	_	_	_	_	_	_	_	_	_	_	_	_	_
TRINITY_DN10616_c0_g4	1.48668	2.23267	0	2.56355	2.82733	1.04702	796	_	_	_	_	_	_	_	_	_	_	_	_	_	_	_	_	_	_	_	_	_
TRINITY_DN10616_c1_g1	0	0.955212	0	0	0.420677	0.585084	444	_	_	_	_	_	_	_	_	_	_	_	_	_	_	_	_	_	_	_	_	_
TRINITY_DN10616_c1_g2	0.65367	0.493666	0	0.527464	0.678317	0.224052	610	_	_	_	_	_	_	_	_	_	_	_	_	_	_	_	_	_	_	_	_	_
TRINITY_DN10616_c1_g3	0.248608	0.189212	0.027509	0.223328	0.173426	0.164834	1565	_	_	_	_	_	_	_	_	_	_	_	_	_	_	_	_	_	_	_	_	_
TRINITY_DN10616_c1_g4	1.03541	0.21256	0.510587	0.962893	0.424947	0	381	_	_	_	_	_	_	_	_	_	_	_	_	_	_	_	_	_	_	_	_	_
TRINITY_DN10616_c1_g5	0	0.790438	0	0.648398	0.384406	1.13586	310	_	_	_	_	_	_	_	_	_	_	_	_	_	_	_	_	_	_	_	_	_
TRINITY_DN10616_c2_g1	0.916272	0.824608	0.716626	1.39306	0	2.14244	593	_	_	_	_	_	_	_	_	_	_	_	_	_	_	_	_	_	_	_	_	_
TRINITY_DN10616_c3_g1	0	0	0	0	1.00587	0	273	_	_	_	_	_	_	_	_	_	_	_	_	_	_	_	_	_	_	_	_	_
TRINITY_DN10617_c0_g1	0.128605	0.368673	0.133476	0.393978	0.604263	0.923787	919	_	_	_	_	_	_	_	_	_	_	_	_	_	_	_	_	_	_	_	_	_
TRINITY_DN10618_c0_g1	0	2.73134	1.92136	0	0	0.445255	546	_	_	_	_	_	_	_	_	_	_	_	_	_	_	_	_	_	_	_	_	_
TRINITY_DN10619_c0_g1	0	0	0	0	0	0	378	_	_	_	_	_	_	_	_	_	_	_	_	_	_	_	_	_	_	_	_	_
TRINITY_DN10619_c1_g1	1.11357	1.12801	1.11899	0	1.1561	1.36954	415	_	_	_	_	_	_	_	_	_	_	_	_	_	_	_	_	_	_	_	_	_
TRINITY_DN10619_c2_g1	0	0.128713	0	0	0	0	827	_	_	_	_	_	_	_	_	_	_	_	_	_	_	_	_	_	_	_	_	_
TRINITY_DN10619_c3_g1	0.526221	0	2.27809	0	0	0.423612	292	_	_	_	_	_	_	_	_	_	_	_	_	_	_	_	_	_	_	_	_	_
TRINITY_DN10619_c3_g2	0	0	0	0	0.713403	0	751	_	_	_	_	_	_	_	_	_	_	_	_	_	_	_	_	_	_	_	_	_
TRINITY_DN10619_c4_g1	0	0.69816	0	0.295628	0.344899	1.02999	324	_	_	_	_	_	_	_	_	_	_	_	_	_	_	_	ko:K21436			_	_	_
TRINITY_DN1061_c0_g1	0	0	0	0	1.05218	0	7556	XP_021188144.1	XP_021188144.1 uncharacterized protein LOC110374652 [Helicoverpa armigera]	92	_	_	_	_	_	_	_	_	_	_	_	_	_	_	_	m.755|TRINITY_DN1061_c0_g1:2-1243(+)	5prime_partial	PF10184.6|DUF2358|Uncharacterized conserved protein (DUF2358)|TRINITY_DN1061_c0_g1_i25|m.755:220-351
TRINITY_DN1061_c2_g1	2.72238	3.0242	2.33617	2.16512	1.52622	0.942354	842	_	_	_	_	_	_	_	_	_	_	_	_	_	_	_	_	_	_	_	_	_
TRINITY_DN1061_c3_g1	1.1503	0	0	3.452	2.33073	1.00066	266	_	_	_	_	_	_	_	_	_	_	_	_	_	_	_	_	_	_	_	_	_
TRINITY_DN10620_c0_g1	0.584833	1.81355	1.35295	1.62331	1.70269	0.565247	889	_	_	_	_	_	_	_	_	_	_	_	_	_	_	_	_	_	_	_	_	_
TRINITY_DN10621_c0_g1	0.142154	0.144427	0	0	0	0.070507	1329	_	_	_	_	_	_	_	_	_	_	_	_	_	_	_	_	_	_	_	_	_
TRINITY_DN10621_c1_g1	0	0	0	1.01253	0	0	232	_	_	_	_	_	_	_	_	_	_	_	_	_	_	_	_	_	_	_	_	_
TRINITY_DN10621_c1_g2	1.17841	0	0	0	0	0.46775	273	_	_	_	_	_	_	_	_	_	_	_	_	_	_	_	_	_	_	_	_	_
TRINITY_DN10621_c2_g1	0	0.138179	0.250191	0	0.211883	0.145113	617	_	_	_	_	_	_	_	_	_	_	_	_	_	_	_	_	_	_	_	_	_
TRINITY_DN10622_c0_g1	0.229077	0.033784	0.311228	0	0.032251	0	3961	CAB3233976.1	CAB3233976.1 unnamed protein product [Arctia plantaginis]	97.8	_	_	_	_	_	_	_	_	_	_	_	_	_	_	_	m.1038|TRINITY_DN10622_c0_g1:249-1352(+)	complete	PF00169.26|PH|PH domain|TRINITY_DN10622_c0_g1_i1|m.1038:143-238;PF00169.26|PH|PH domain|TRINITY_DN10622_c0_g1_i1|m.1038:269-360;PF00595.21|PDZ|PDZ domain (Also known as DHR or GLGF)|TRINITY_DN10622_c0_g1_i1|m.1038:53-123;PF13180.3|PDZ_2|PDZ domain|TRINITY_DN10622_c0_g1_i1|m.1038:67-108
TRINITY_DN10623_c0_g1	0.059929	0.090397	0	0.291951	0.029785	0.050367	1445	_	_	_	_	_	_	_	_	_	_	_	_	_	_	_	_	_	_	m.1131|TRINITY_DN10623_c0_g1:564-1055(+)	complete	_
TRINITY_DN10624_c0_g1	28.0373	25.5179	22.5402	25.8042	32.1373	19.2375	370	XP_026736987.1	XP_026736987.1 charged multivesicular body protein 5 [Trichoplusia ni]	98.4	sp|Q9VVI9|CHMP5_DROME	sp|Q9VVI9|CHMP5_DROME Charged multivesicular body protein 5 OS=Drosophila melanogaster OX=7227 GN=Vps60 PE=1 SV=2	85.2	_	_	_	_	_	_	GO:0006900|vesicle budding from membrane;GO:0015031|protein transport;GO:0032509|endosome transport via multivesicular body sorting pathway;GO:0032511|late endosome to vacuole transport via multivesicular body sorting pathway;GO:0046718|viral entry into host cell	GO:0000815|ESCRT III complex;GO:0005771|multivesicular body	_	ko:K12198	CHMP5, VPS60	path:ko04144	m.1120|TRINITY_DN10624_c0_g1:3-368(+)	internal	PF03357.18|Snf7|Snf7|TRINITY_DN10624_c0_g1_i1|m.1120:2-94
TRINITY_DN10625_c0_g1	1.85203	2.68611	5.9522	3.74876	1.97443	2.78355	338	_	_	_	_	_	_	_	_	_	_	_	_	_	_	_	_	_	_	_	_	_
TRINITY_DN10625_c1_g1	0.388722	0.418434	0.202523	0.205329	0.578912	0.116602	1125	_	_	_	_	_	_	_	_	_	_	_	_	_	_	_	_	_	_	_	_	_
TRINITY_DN10625_c1_g2	1.16894	0.641553	0.788345	0.383351	1.77934	0.52786	420	_	_	_	_	_	_	_	_	_	_	_	_	_	_	_	_	_	_	_	_	_
TRINITY_DN10625_c2_g1	0.492406	0	0	0	0	0	302	_	_	_	_	_	_	_	_	_	_	_	_	_	_	_	_	_	_	_	_	_
TRINITY_DN10625_c3_g1	0	0.352239	0	0.892643	0	0	323	_	_	_	_	_	_	_	_	_	_	_	_	_	_	_	_	_	_	_	_	_
TRINITY_DN10625_c4_g1	0	0	0	0	0	0	207	_	_	_	_	_	_	_	_	_	_	_	_	_	_	_	_	_	_	_	_	_
TRINITY_DN10625_c5_g1	0	0	0	0	0	0.396486	303	_	_	_	_	_	_	_	_	_	_	_	_	_	_	_	_	_	_	_	_	_
TRINITY_DN10625_c6_g1	0	0	0	0	0.660301	0	328	_	_	_	_	_	_	_	_	_	_	_	_	_	_	_	_	_	_	_	_	_
TRINITY_DN10626_c0_g1	0	0.90662	0	1.17117	0	1.04325	876	_	_	_	_	_	_	_	_	_	_	_	_	_	_	_	_	_	_	_	_	_
TRINITY_DN10627_c0_g1	0.237479	0.120829	0.13782	0.211483	0.109794	0.044574	3616	_	_	_	_	_	_	_	_	_	_	_	_	_	_	_	_	_	_	_	_	_
TRINITY_DN10628_c0_g1	0	0	0	1.12721	0	0	217	_	_	_	_	_	_	_	_	_	_	_	_	_	_	_	_	_	_	_	_	_
TRINITY_DN10629_c0_g1	0	1.66084	0	1.66298	0	0	266	_	_	_	_	_	_	_	_	_	_	_	_	_	_	_	_	_	_	_	_	_
TRINITY_DN1062_c0_g1	2.07496	1.65812	2.319	5.71219	4.20897	2.64065	2671	AAA92147.1	AAA92147.1 reverse transcriptase [Bombyx mori]	76.8	_	_	_	_	_	_	_	_	_	_	_	_	_	_	_	_	_	_
TRINITY_DN10630_c0_g1	1.90141	0	0	0.573294	0	0	2147	_	_	_	_	_	_	_	_	_	_	_	_	_	_	_	_	_	_	_	_	_
TRINITY_DN10631_c0_g1	0.213616	0.580582	0.520131	0.199296	1.11102	0	408	_	_	_	_	_	_	_	_	_	_	_	_	_	_	_	_	_	_	_	_	_
TRINITY_DN10632_c0_g1	0	0	0	0.442254	0.725475	0.314555	1452	_	_	_	_	_	_	_	_	_	_	_	_	_	_	_	_	_	_	_	_	_
TRINITY_DN10632_c1_g1	2.09305	0	0	0.361432	0	0.423612	292	_	_	_	_	_	_	_	_	_	_	_	_	_	_	_	_	_	_	_	_	_
TRINITY_DN10633_c0_g1	1.20391	1.39063	1.92046	3.22616	3.17155	0.493518	451	XP_021186007.1	XP_021186007.1 myrosinase 1-like [Helicoverpa armigera]	90.1	sp|Q95X01|MYRO1_BREBR	sp|Q95X01|MYRO1_BREBR Myrosinase 1 OS=Brevicoryne brassicae OX=69196 PE=1 SV=1	74.8	_	_	_	_	_	_	GO:0005975|carbohydrate metabolic process		GO:0019137|thioglucosidase activity;GO:0046872|metal ion binding;GO:0102799|glucosinolate glucohydrolase activity	_	_	_	m.1068|TRINITY_DN10633_c0_g1:1-450(+)	internal	PF00232.15|Glyco_hydro_1|Glycosyl hydrolase family 1|TRINITY_DN10633_c0_g1_i1|m.1068:39-150
TRINITY_DN10634_c0_g1	0	0	0	0	0.474772	0.447329	282	_	_	_	_	_	_	_	_	_	_	_	_	_	_	_	_	_	_	_	_	_
TRINITY_DN10634_c0_g2	0.104354	0.419097	0.615651	0.049037	0.030749	0.093865	1067	_	_	_	_	_	_	_	_	_	_	_	_	_	_	_	_	_	_	_	_	_
TRINITY_DN10634_c1_g1	0.83456	0	0	1.21981	0	0	207	_	_	_	_	_	_	_	_	_	_	_	_	_	_	_	_	_	_	_	_	_
TRINITY_DN10635_c0_g1	0.126769	0.128962	0.150246	0.215035	0.162565	0	2109	_	_	_	_	_	_	_	_	_	_	_	_	_	_	_	_	_	_	_	_	_
TRINITY_DN10636_c0_g1	0	0.842399	0	1.35793	0	1.16389	1063	_	_	_	_	_	_	_	_	_	_	_	_	_	_	_	_	_	_	_	_	_
TRINITY_DN10637_c0_g1	0	0.93434	0	1.92959	0	1.08155	1443	PZC75272.1	PZC75272.1 hypothetical protein B5X24_HaOG206504 [Helicoverpa armigera]	83.5	sp|O02350|CBPA1_ANOGA	sp|O02350|CBPA1_ANOGA Zinc carboxypeptidase A 1 OS=Anopheles gambiae OX=7165 GN=AGAP009593 PE=2 SV=3	53.6	_	_	_	_	_	_	GO:0006508|proteolysis;GO:0007586|digestion	GO:0005615|extracellular space	GO:0004181|metallocarboxypeptidase activity;GO:0008270|zinc ion binding	_	_	_	m.1057|TRINITY_DN10637_c0_g1:51-1394(+)	complete	PF00246.21|Peptidase_M14|Zinc carboxypeptidase|TRINITY_DN10637_c0_g1_i2|m.1057:128-404;PF02244.13|Propep_M14|Carboxypeptidase activation peptide|TRINITY_DN10637_c0_g1_i2|m.1057:30-101
TRINITY_DN10638_c0_g1	0	5.73354	0	0	11.1922	0	346	_	_	_	_	_	_	_	_	_	_	_	_	_	_	_	_	_	_	_	_	_
TRINITY_DN10639_c0_g1	7.56798	3.88389	0	0	12.7374	0	271	_	_	_	_	_	_	_	_	_	_	_	_	_	_	_	_	_	_	_	_	_
TRINITY_DN1063_c0_g1	5.44368	0	0	3.9942	11.4556	2.94292	2667	XP_022822058.1	XP_022822058.1 uncharacterized protein LOC111353318 [Spodoptera litura]	64.9	_	_	_	_	_	_	_	_	_	_	_	_	_	_	_	m.725|TRINITY_DN1063_c0_g1:129-656(+)	complete	_
TRINITY_DN10640_c0_g1	8.98518	9.04769	5.40031	3.24179	5.51882	3.56293	538	_	_	_	_	_	_	_	_	_	_	_	_	_	_	_	_	_	_	_	_	_
TRINITY_DN10641_c0_g1	1.74128	1.22257	1.51054	0.642819	0.927901	0.932016	481	_	_	_	_	_	_	_	_	_	_	_	_	_	_	_	_	_	_	_	_	_
TRINITY_DN10641_c0_g2	0	0	0	0	0	1.30091	210	_	_	_	_	_	_	_	_	_	_	_	_	_	_	_	_	_	_	_	_	_
TRINITY_DN10641_c1_g1	0	0	0	0.516452	1.27	0	229	_	_	_	_	_	_	_	_	_	_	_	_	_	_	_	_	_	_	_	_	_
TRINITY_DN10641_c1_g2	0.659278	0.821817	0	0.488138	0	0.144614	446	PCG79705.1	PCG79705.1 hypothetical protein B5V51_14410 [Heliothis virescens]	84.2	_	_	_	_	_	_	_	_	_	_	_	_	_	_	_	m.1118|TRINITY_DN10641_c1_g2:3-446(+)	internal	_
TRINITY_DN10641_c3_g1	2.20431	0.610322	0	0.978302	0.300398	0	339	_	_	_	_	_	_	_	_	_	_	_	_	_	_	_	_	_	_	_	_	_
TRINITY_DN10641_c4_g1	0	0	0	0	0	0	202	_	_	_	_	_	_	_	_	_	_	_	_	_	_	_	_	_	_	_	_	_
TRINITY_DN10642_c0_g1	1.00375	4.34235	2.13741	4.50999	21.5868	11.4702	299	AEA76315.1	AEA76315.1 HMG176 isoform A, partial [Mamestra configurata]	95.8	_	_	_	_	_	_	_	_	_	_	_	_	_	_	_	_	_	_
TRINITY_DN10643_c0_g1	0	0	0	0.418007	0	0.480189	265	_	_	_	_	_	_	_	_	_	_	_	_	_	_	_	_	_	_	_	_	_
TRINITY_DN10644_c0_g1	9.53238	7.13	5.33767	1.91791	6.60974	4.25347	2126	_	_	_	_	_	_	_	_	_	_	_	_	_	_	_	_	_	_	_	_	_
TRINITY_DN10645_c0_g1	2.57081	1.76536	0	0.438883	3.87924	1.01192	256	RVE41434.1	RVE41434.1 hypothetical protein evm_013916 [Chilo suppressalis]	83	_	_	_	_	_	_	_	_	_	_	_	_	_	_	_	_	_	_
TRINITY_DN10645_c0_g2	0	2.05701	2.81757	3.4983	0	2.36861	326	_	_	_	_	_	_	_	_	_	_	_	_	_	_	_	_	_	_	_	_	_
TRINITY_DN10645_c1_g1	3.27963	4.6599	3.20278	2.2684	2.83676	1.56884	886	_	_	_	_	_	_	_	_	_	_	_	_	_	_	_	_	_	_	m.1133|TRINITY_DN10645_c1_g1:3-308(+)	5prime_partial	_
TRINITY_DN10645_c2_g1	3.3222	1.83697	0.781553	0.913174	5.17331	0.522523	249	_	_	_	_	_	_	_	_	_	_	_	_	_	_	_	_	_	_	_	_	_
TRINITY_DN10646_c0_g1	5.19982	4.3373	0	0	0	0.330967	329	KAF9804218.1	KAF9804218.1 hypothetical protein SFRURICE_020646 [Spodoptera frugiperda]	100	sp|Q17LW0|MYO7A_AEDAE	sp|Q17LW0|MYO7A_AEDAE Myosin-VIIa OS=Aedes aegypti OX=7159 GN=ck PE=3 SV=1	85.7	_	_	_	_	_	_	GO:0007605|sensory perception of sound;GO:0008407|chaeta morphogenesis;GO:0030048|actin filament-based movement;GO:0035317|imaginal disc-derived wing hair organization;GO:0048800|antennal morphogenesis	GO:0005737|cytoplasm;GO:0016459|myosin complex	GO:0003774|motor activity;GO:0005524|ATP binding;GO:0030898|actin-dependent ATPase activity;GO:0032027|myosin light chain binding;GO:0051015|actin filament binding	ko:K10359	MYO7		m.1042|TRINITY_DN10646_c0_g1:2-328(+)	internal	_
TRINITY_DN10647_c0_g1	0.212341	0.451374	0.363885	0.259605	0	0.040213	1052	_	_	_	_	_	_	_	_	_	_	_	_	_	_	_	_	_	_	_	_	_
TRINITY_DN10649_c0_g1	0	0.358204	0	0.227023	0	0	404	_	_	_	_	_	_	_	_	_	_	_	_	_	_	_	_	_	_	_	_	_
TRINITY_DN10649_c0_g2	0	0	0.492706	0.524549	0	0	308	_	_	_	_	_	_	_	_	_	_	_	_	_	_	_	_	_	_	_	_	_
TRINITY_DN10649_c1_g1	0	1.89769	0	0	0	0	774	_	_	_	_	_	_	_	_	_	_	_	_	_	_	_	_	_	_	_	_	_
TRINITY_DN1064_c0_g1	3.86732	3.65261	2.13275	2.9887	5.05848	2.03725	3325	KAF9797264.1	KAF9797264.1 hypothetical protein SFRURICE_006246 [Spodoptera frugiperda]	63.6	_	_	_	_	_	_	_	_	_	_	_	_	_	_	_	_	_	_
TRINITY_DN10650_c0_g1	0.395168	0	0.244305	0.51829	0.030228	0.472856	2631	XP_022814408.1	XP_022814408.1 PR domain zinc finger protein 10-like [Spodoptera litura]	74.8	_	_	_	_	_	_	_	_	_	_	_	_	_	_	_	m.1085|TRINITY_DN10650_c0_g1:217-2289(+)	complete	_
TRINITY_DN10650_c1_g1	0	0	0	0.581354	0.692634	0	213	_	_	_	_	_	_	_	_	_	_	_	_	_	_	_	_	_	_	_	_	_
TRINITY_DN10651_c0_g1	0	0	0	0	16.1032	8.13237	307	XP_022838005.1	XP_022838005.1 myosin-IA isoform X2 [Spodoptera litura]	99	_	_	_	_	_	_	_	_	_	_	_	_	ko:K10356	MYO1		m.1098|TRINITY_DN10651_c0_g1:1-306(+)	internal	_
TRINITY_DN10652_c0_g1	0	0	2.82808	0	5.20096	6.16961	529	XP_006820937.1	XP_006820937.1 PREDICTED: uncharacterized protein LOC102810278, partial [Saccoglossus kowalevskii]	54.5	_	_	_	_	_	_	_	_	_	_	_	_	_	_	_	_	_	_
TRINITY_DN10653_c0_g1	0.114158	0.345592	0.09965	0.293336	0.490972	0.29195	1717	_	_	_	_	_	_	_	_	_	_	_	_	_	_	_	_	_	_	_	_	_
TRINITY_DN10654_c0_g1	0.671423	1.40182	1.98824	0	1.35464	0.311835	646	_	_	_	_	_	_	_	_	_	_	_	_	_	_	_	_	_	_	_	_	_
TRINITY_DN10655_c0_g1	6.37204	6.81747	3.59972	13.5047	3.85053	7.57175	2013	XP_021193766.1	XP_021193766.1 protein downstream neighbor of son homolog [Helicoverpa armigera]	96.3	sp|Q9VNA8|DONS_DROME	sp|Q9VNA8|DONS_DROME Protein downstream neighbor of son homolog OS=Drosophila melanogaster OX=7227 GN=hd PE=1 SV=1	52.7	_	_	_	_	_	_	GO:0007275|multicellular organism development;GO:0007307|eggshell chorion gene amplification;GO:0033260|nuclear DNA replication;GO:0051301|cell division	GO:0005634|nucleus	_	_	_	_	m.1079|TRINITY_DN10655_c0_g1:221-1924(+)	complete	_
TRINITY_DN10656_c0_g1	0	0.244811	0.021175	0.26941	0.197863	0.620535	1632	_	_	_	_	_	_	_	_	_	_	_	_	_	_	_	_	_	_	_	_	_
TRINITY_DN10657_c0_g1	0	0	0	0	0.195578	0	3767	KAF9787684.1	KAF9787684.1 hypothetical protein SFRURICE_016870 [Spodoptera frugiperda]	84.4	_	_	_	_	_	_	_	_	_	_	_	_	_	_	_	m.1040|TRINITY_DN10657_c0_g1:1-3618(+)	5prime_partial	_
TRINITY_DN10658_c0_g1	0	0	0	0.452063	0.168129	0.527738	414	_	_	_	_	_	_	_	_	_	_	_	_	_	_	_	_	_	_	_	_	_
TRINITY_DN10658_c1_g1	0.206861	0.704234	0	0.934627	0.180229	1.28985	678	_	_	_	_	_	_	_	_	_	_	_	_	_	_	_	_	_	_	_	_	_
TRINITY_DN10659_c0_g1	0.700069	0.518261	0	0.188924	0.532494	0.077796	594	_	_	_	_	_	_	_	_	_	_	_	_	_	_	_	_	_	_	_	_	_
TRINITY_DN10659_c1_g1	0	0.602214	0.180794	0	0	0.317804	430	_	_	_	_	_	_	_	_	_	_	_	_	_	_	_	_	_	_	_	_	_
TRINITY_DN1065_c0_g1	1.7281	1.32366	2.06585	0	0	0.856359	2631	XP_021181015.1	XP_021181015.1 glycerophosphodiester phosphodiesterase GDPD6-like [Helicoverpa armigera]	86.5	_	_	_	_	_	_	_	_	_	_	_	_	_	_	_	m.629|TRINITY_DN1065_c0_g1:345-1514(+)	complete	PF03009.14|GDPD|Glycerophosphoryl diester phosphodiesterase family|TRINITY_DN1065_c0_g1_i3|m.629:46-364
TRINITY_DN10660_c0_g1	13.9457	2.5846	5.7156	0.86778	0	0.395421	463	_	_	_	_	_	_	_	_	_	_	_	_	_	_	_	_	_	_	_	_	_
TRINITY_DN10661_c0_g1	0.204858	0.406786	0.280676	0.097427	0.297464	0.06095	682	_	_	_	_	_	_	_	_	_	_	_	_	_	_	_	_	_	_	_	_	_
TRINITY_DN10662_c0_g1	0	0	0	0	7.74021	1.77822	397	PCG75064.1	PCG75064.1 hypothetical protein B5V51_12307, partial [Heliothis virescens]	94.7	_	_	_	_	_	_	_	_	_	_	_	_	_	_	_	m.1117|TRINITY_DN10662_c0_g1:1-396(+)	internal	_
TRINITY_DN10663_c0_g1	0.346834	0.162972	0.065736	0.377363	0.268295	0.085144	1148	_	_	_	_	_	_	_	_	_	_	_	_	_	_	_	_	_	_	_	_	_
TRINITY_DN10664_c0_g1	0	0	0	0	2.58016	0.587577	226	_	_	_	_	_	_	_	_	_	_	_	_	_	_	_	_	_	_	_	_	_
TRINITY_DN10665_c0_g1	0.333512	0.15835	0.186088	0.124811	0.217336	0.040109	1510	_	_	_	_	_	_	_	_	_	_	_	_	_	_	_	_	_	_	_	_	_
TRINITY_DN10666_c0_g1	0	0.312163	0	0.184838	0	0	806	GBP31442.1	GBP31442.1 hypothetical protein EVAR_17931_1 [Eumeta japonica]	75.4	_	_	_	_	_	_	_	_	_	_	_	_	_	_	_	_	_	_
TRINITY_DN10667_c0_g1	0.17885	0.205811	0.110213	0.17796	0.15942	0.22144	7109	_	_	_	_	_	_	_	_	_	_	_	_	_	_	_	_	_	_	_	_	_
TRINITY_DN10667_c1_g1	2.28597	1.46339	0	3.92718	0	3.69782	384	_	_	_	_	_	_	_	_	_	_	_	_	_	_	_	_	_	_	_	_	_
TRINITY_DN10668_c0_g1	0.174735	0	0	0	0	0	874	_	_	_	_	_	_	_	_	_	_	_	_	_	_	_	_	_	_	_	_	_
TRINITY_DN10668_c1_g1	0.051915	0.177213	0.10739	0.036823	0.050434	0.046519	808	_	_	_	_	_	_	_	_	_	_	_	_	_	_	_	_	_	_	_	_	_
TRINITY_DN10669_c0_g1	8.53538	6.84975	0	3.05382	8.01236	0	423	XP_022827277.1	XP_022827277.1 hepatoma-derived growth factor-related protein 2-like isoform X4 [Spodoptera litura]	82.8	_	_	_	_	_	_	_	_	_	_	_	_	_	_	_	m.1073|TRINITY_DN10669_c0_g1:1-423(+)	internal	_
TRINITY_DN1066_c0_g1	0	2.14539	1.78801	2.60878	1.99798	0	2112	KAF9406160.1	KAF9406160.1 hypothetical protein HW555_013371 [Spodoptera exigua]	98.4	_	_	_	_	_	_	_	_	_	_	_	_	ko:K12185	VPS37	path:ko04144	m.3097|TRINITY_DN1066_c0_g1:129-1046(+)	complete	PF07200.10|Mod_r|Modifier of rudimentary (Mod(r)) protein|TRINITY_DN1066_c0_g1_i3|m.3097:147-287
TRINITY_DN10670_c0_g1	0	0	0	0	0.900463	0.186796	460	PCG64584.1	PCG64584.1 hypothetical protein B5V51_10444, partial [Heliothis virescens]	91.7	_	_	_	_	_	_	_	_	_	_	_	_	_	_	_	_	_	_
TRINITY_DN10671_c0_g1	0.803582	0.133193	0	0	1.74717	0	451	_	_	_	_	_	_	_	_	_	_	_	_	_	_	_	_	_	_	_	_	_
TRINITY_DN10672_c0_g1	0	0	0	0	1.8736	0	273	XP_035438431.1	XP_035438431.1 chymotrypsinogen A-like [Spodoptera frugiperda]	54.4	_	_	_	_	_	_	_	_	_	_	_	_	_	_	_	_	_	_
TRINITY_DN10673_c0_g1	0.256708	0.690112	0.510797	0.635475	1.30482	0.41543	514	_	_	_	_	_	_	_	_	_	_	_	_	_	_	_	_	_	_	_	_	_
TRINITY_DN10675_c0_g1	0	2.73016	1.57015	0	4.45866	0	473	PZC84833.1	PZC84833.1 hypothetical protein B5X24_HaOG203823 [Helicoverpa armigera]	98.1	_	_	_	_	_	_	_	_	_	_	_	_	ko:K10357	MYO5		m.1122|TRINITY_DN10675_c0_g1:3-473(+)	internal	_
TRINITY_DN10676_c0_g1	2.26639	1.06414	0.816078	0.914779	3.41446	0.737152	6010	_	_	_	_	_	_	_	_	_	_	_	_	_	_	_	_	_	_	_	_	_
TRINITY_DN10677_c0_g1	0	0	0.356273	0	0	0	1175	_	_	_	_	_	_	_	_	_	_	_	_	_	_	_	_	_	_	_	_	_
TRINITY_DN10678_c0_g1	0.509662	0.686019	0.797262	0.89129	0.634411	0.243374	1197	_	_	_	_	_	_	_	_	_	_	_	_	_	_	_	_	_	_	_	_	_
TRINITY_DN10679_c0_g1	0.301972	0.430597	0.104093	0	0.441717	0	825	_	_	_	_	_	_	_	_	_	_	_	_	_	_	_	_	_	_	_	_	_
TRINITY_DN10679_c0_g2	0.156949	0.071698	0.09558	0.02883	0.287961	0.014948	3587	XP_013181000.1	XP_013181000.1 PREDICTED: uncharacterized protein LOC106127467 [Papilio xuthus]	55.2	_	_	_	_	_	_	_	_	_	_	_	_	_	_	_	m.1121|TRINITY_DN10679_c0_g2:369-680(+)	complete	_
TRINITY_DN1067_c0_g1	1.21109	1.23631	0.66446	0.855598	0.839229	0.746214	4502	XP_022825353.1	XP_022825353.1 A disintegrin and metalloproteinase with thrombospondin motifs 3-like isoform X1 [Spodoptera litura]	92.7	_	_	_	_	_	_	_	_	_	_	_	_	ko:K08619	ADAMTS3		m.414|TRINITY_DN1067_c0_g1:438-3530(+)	complete	PF01421.16|Reprolysin|Reprolysin (M12B) family zinc metalloprotease|TRINITY_DN1067_c0_g1_i9|m.414:194-383;PF13688.3|Reprolysin_5|Metallo-peptidase family M12|TRINITY_DN1067_c0_g1_i9|m.414:196-360;PF13574.3|Reprolysin_2|Metallo-peptidase family M12B Reprolysin-like|TRINITY_DN1067_c0_g1_i9|m.414:213-383;PF13582.3|Reprolysin_3|Metallo-peptidase family M12B Reprolysin-like|TRINITY_DN1067_c0_g1_i9|m.4…
TRINITY_DN10680_c0_g1	0.055722	0	0.058959	0.164795	0.084329	0.139595	2226	KAF9407479.1	KAF9407479.1 hypothetical protein HW555_012508 [Spodoptera exigua]	56.8	_	_	_	_	_	_	_	_	_	_	_	_	_	_	_	m.1134|TRINITY_DN10680_c0_g1:948-1763(+);m.1136|TRINITY_DN10680_c0_g1:160-471(+)	complete;complete	PF13894.3|zf-C2H2_4|C2H2-type zinc finger|TRINITY_DN10680_c0_g1_i3|m.1134:145-167;PF13894.3|zf-C2H2_4|C2H2-type zinc finger|TRINITY_DN10680_c0_g1_i3|m.1134:233-255;PF02892.12|zf-BED|BED zinc finger|TRINITY_DN10680_c0_g1_i3|m.1134:229-256
TRINITY_DN10681_c0_g1	0.141373	0.275249	0.166685	0.445603	0.550671	0.749916	1827	_	_	_	_	_	_	_	_	_	_	_	_	_	_	_	_	_	_	_	_	_
TRINITY_DN10682_c0_g1	0	0.075768	0	0.235141	0.07273	0.038902	2275	XP_022814933.1	XP_022814933.1 transmembrane protein 136-like [Spodoptera litura]	77.5	_	_	_	_	_	_	_	_	_	_	_	_	_	_	_	m.1093|TRINITY_DN10682_c0_g1:1273-1716(+)	complete	_
TRINITY_DN10682_c0_g2	0.060143	0	0.067966	0.296233	0.026635	0.081231	1190	_	_	_	_	_	_	_	_	_	_	_	_	_	_	_	_	_	_	_	_	_
TRINITY_DN10682_c1_g1	0	0.602472	0	0.318664	0	0	470	_	_	_	_	_	_	_	_	_	_	_	_	_	_	_	_	_	_	_	_	_
TRINITY_DN10683_c0_g1	0.432276	0.068815	0	0	0.374847	0	661	_	_	_	_	_	_	_	_	_	_	_	_	_	_	_	_	_	_	_	_	_
TRINITY_DN10684_c0_g1	0	2.57083	0	0.884139	0	0	950	KPJ21651.1	KPJ21651.1 hypothetical protein RR48_00058 [Papilio machaon]	84	_	_	_	_	_	_	_	_	_	_	_	_	_	_	_	_	_	_
TRINITY_DN10685_c0_g1	0	0.518198	0	0.788686	0	0	276	_	_	_	_	_	_	_	_	_	_	_	_	_	_	_	_	_	_	_	_	_
TRINITY_DN10686_c0_g1	2.85443	0	0	0.573217	0	1.7163	624	_	_	_	_	_	_	_	_	_	_	_	_	_	_	_	_	_	_	_	_	_
TRINITY_DN10687_c0_g1	0.108519	0.137149	0.136265	0.154333	0.173618	0.058736	1540	_	_	_	_	_	_	_	_	_	_	_	_	_	_	_	_	_	_	_	_	_
TRINITY_DN10687_c1_g1	2.06956	1.34606	0	0	0	0	241	XP_022837721.1	XP_022837721.1 putative inorganic phosphate cotransporter [Spodoptera litura]	71.4	_	_	_	_	_	_	_	_	_	_	_	_	_	_	_	_	_	_
TRINITY_DN10688_c0_g1	0	0.56579	0.473104	0	0.208995	0	1794	KAF9411646.1	KAF9411646.1 hypothetical protein HW555_009610 [Spodoptera exigua]	92.6	_	_	_	_	_	_	_	_	_	_	_	_	_	_	_	m.1114|TRINITY_DN10688_c0_g1:357-1619(+)	complete	PF02958.17|EcKinase|Ecdysteroid kinase|TRINITY_DN10688_c0_g1_i2|m.1114:45-335;PF07914.8|DUF1679|Protein of unknown function (DUF1679)|TRINITY_DN10688_c0_g1_i2|m.1114:157-345;PF01636.20|APH|Phosphotransferase enzyme family|TRINITY_DN10688_c0_g1_i2|m.1114:167-323
TRINITY_DN10689_c0_g1	1.02188	0.650113	0.506971	0.259676	0.613565	0.122286	991	_	_	_	_	_	_	_	_	_	_	_	_	_	_	_	_	_	_	_	_	_
TRINITY_DN10689_c0_g2	0.160786	0.218869	0	0	0.313734	0	1162	_	_	_	_	_	_	_	_	_	_	_	_	_	_	_	_	_	_	_	_	_
TRINITY_DN10689_c1_g1	0.634946	0.173874	0	1.25808	0.174941	0	408	_	_	_	_	_	_	_	_	_	_	_	_	_	_	_	_	_	_	_	_	_
TRINITY_DN10689_c2_g1	0	2.32906	0.752689	0	0	0	255	_	_	_	_	_	_	_	_	_	_	_	_	_	_	_	_	_	_	_	_	_
TRINITY_DN10689_c3_g1	0	0.60985	0	0.265835	0	0	339	_	_	_	_	_	_	_	_	_	_	_	_	_	_	_	_	_	_	_	_	_
TRINITY_DN1068_c0_g1	0	0	1.21529	1.63055	2.17782	2.65941	4255	PCG75535.1	PCG75535.1 hypothetical protein B5V51_11470 [Heliothis virescens]	85.3	sp|A9ZSY2|TRET1_APILI	sp|A9ZSY2|TRET1_APILI Facilitated trehalose transporter Tret1 OS=Apis mellifera ligustica OX=7469 GN=Tret1 PE=1 SV=1	53.1	_	_	_	_	_	_	GO:0015771|trehalose transport	GO:0005886|plasma membrane;GO:0016021|integral component of membrane	GO:0015574|trehalose transmembrane transporter activity	_	_	_	m.3193|TRINITY_DN1068_c0_g1:147-2057(+)	complete	PF00083.21|Sugar_tr|Sugar (and other) transporter|TRINITY_DN1068_c0_g1_i4|m.3193:223-621;PF07690.13|MFS_1|Major Facilitator Superfamily|TRINITY_DN1068_c0_g1_i4|m.3193:190-446
TRINITY_DN10690_c0_g1	0	0.954635	1.64213	0	1.39849	0	579	_	_	_	_	_	_	_	_	_	_	_	_	_	_	_	_	_	_	_	_	_
TRINITY_DN10691_c0_g1	0	0.10698	0.031015	0.177727	0.352009	0.117992	1384	_	_	_	_	_	_	_	_	_	_	_	_	_	_	_	_	_	_	_	_	_
TRINITY_DN10692_c0_g1	1.3691	1.39512	1.11276	1.14054	1.7186	0.662931	2964	XP_021187853.1	XP_021187853.1 protein-serine O-palmitoleoyltransferase porcupine [Helicoverpa armigera]	96.8	sp|Q7Q3N5|PORCN_ANOGA	sp|Q7Q3N5|PORCN_ANOGA Protein-serine O-palmitoleoyltransferase porcupine OS=Anopheles gambiae OX=7165 GN=por PE=3 SV=1	51.1	_	_	_	_	_	_	GO:0006497|protein lipidation;GO:0016055|Wnt signaling pathway;GO:0018345|protein palmitoylation;GO:0030258|lipid modification;GO:0045234|protein palmitoleylation;GO:0060070|canonical Wnt signaling pathway;GO:0061355|Wnt protein secretion	GO:0005783|endoplasmic reticulum;GO:0005789|endoplasmic reticulum membrane;GO:0016020|membrane;GO:0016021|integral component of membrane	GO:0016746|transferase activity, transferring acyl groups;GO:0017147|Wnt-protein binding;GO:1990698|palmitoleoyltransferase activity	ko:K00181	PORCN	path:ko04310	m.1067|TRINITY_DN10692_c0_g1:202-1527(+)	complete	PF03062.16|MBOAT|MBOAT, membrane-bound O-acyltransferase family|TRINITY_DN10692_c0_g1_i1|m.1067:146-330
TRINITY_DN10693_c0_g1	2.75584	1322.18	14.6161	67.2508	6.22628	5201.02	395	AKR06191.1	AKR06191.1 trypsin [Mythimna separata]	95.8	sp|P35042|TRYP_CHOFU	sp|P35042|TRYP_CHOFU Trypsin CFT-1 OS=Choristoneura fumiferana OX=7141 PE=1 SV=1	82.9	_	_	_	_	_	_		GO:0005615|extracellular space	GO:0004252|serine-type endopeptidase activity	_	_	_	m.1078|TRINITY_DN10693_c0_g1:2-352(+)	5prime_partial	PF00089.23|Trypsin|Trypsin|TRINITY_DN10693_c0_g1_i6|m.1078:35-115
TRINITY_DN10694_c0_g1	0.13465	0.177337	0.0335	0.090004	0.215988	0.03671	5501	CAB3258839.1	CAB3258839.1 unnamed protein product [Arctia plantaginis]	75.7	_	_	_	_	_	_	_	_	_	_	_	_	_	_	_	m.1108|TRINITY_DN10694_c0_g1:4893-5225(+)	complete	_
TRINITY_DN10695_c0_g1	9.37699	0	13.9233	0	0	6.74035	234	PCG62781.1	PCG62781.1 hypothetical protein B5V51_13670, partial [Heliothis virescens]	97.4	sp|Q22633|HPPD_CAEEL	sp|Q22633|HPPD_CAEEL 4-hydroxyphenylpyruvate dioxygenase OS=Caenorhabditis elegans OX=6239 GN=hpd-1 PE=3 SV=1	81	_	_	_	_	_	_	GO:0006559|L-phenylalanine catabolic process;GO:0006572|tyrosine catabolic process	GO:0000139|Golgi membrane;GO:0005789|endoplasmic reticulum membrane	GO:0003868|4-hydroxyphenylpyruvate dioxygenase activity;GO:0046872|metal ion binding	ko:K00457	HPD, hppD	path:ko00130;path:ko00350;path:ko00360;path:ko01100	_	_	_
TRINITY_DN10695_c1_g1	0	0.138944	0	0	2.95715	0.261954	778	PCG62781.1	PCG62781.1 hypothetical protein B5V51_13670, partial [Heliothis virescens]	93.4	sp|Q60Y65|HPPD_CAEBR	sp|Q60Y65|HPPD_CAEBR 4-hydroxyphenylpyruvate dioxygenase OS=Caenorhabditis briggsae OX=6238 GN=hpd-1 PE=3 SV=1	79.1	_	_	_	_	_	_	GO:0006559|L-phenylalanine catabolic process;GO:0006572|tyrosine catabolic process	GO:0000139|Golgi membrane;GO:0005789|endoplasmic reticulum membrane	GO:0003868|4-hydroxyphenylpyruvate dioxygenase activity;GO:0046872|metal ion binding	ko:K00457	HPD, hppD	path:ko00130;path:ko00350;path:ko00360;path:ko01100	m.1070|TRINITY_DN10695_c1_g1:2-772(+)	5prime_partial	PF00903.22|Glyoxalase|Glyoxalase/Bleomycin resistance protein/Dioxygenase superfamily|TRINITY_DN10695_c1_g1_i2|m.1070:57-210
TRINITY_DN10695_c1_g2	16.7796	0	21.1095	0	1.52516	5.30453	362	PCG62625.1	PCG62625.1 hypothetical protein B5V51_14051, partial [Heliothis virescens]	97.5	sp|Q60Y65|HPPD_CAEBR	sp|Q60Y65|HPPD_CAEBR 4-hydroxyphenylpyruvate dioxygenase OS=Caenorhabditis briggsae OX=6238 GN=hpd-1 PE=3 SV=1	74.8	_	_	_	_	_	_	GO:0006559|L-phenylalanine catabolic process;GO:0006572|tyrosine catabolic process	GO:0000139|Golgi membrane;GO:0005789|endoplasmic reticulum membrane	GO:0003868|4-hydroxyphenylpyruvate dioxygenase activity;GO:0046872|metal ion binding	ko:K00457	HPD, hppD	path:ko00130;path:ko00350;path:ko00360;path:ko01100	m.1072|TRINITY_DN10695_c1_g2:2-361(+)	internal	_
TRINITY_DN10695_c2_g1	0	0	0	0	9.92658	0.470949	313	XP_030041271.1	XP_030041271.1 4-hydroxyphenylpyruvate dioxygenase [Manduca sexta]	97.5	_	_	_	_	_	_	_	_	_	_	_	_	ko:K00457	HPD, hppD	path:ko00130;path:ko00350;path:ko00360;path:ko01100	_	_	_
TRINITY_DN10695_c2_g2	0	0	0	0.55922	8.32494	0	218	XP_030041271.1	XP_030041271.1 4-hydroxyphenylpyruvate dioxygenase [Manduca sexta]	97.8	_	_	_	_	_	_	_	_	_	_	_	_	_	_	_	_	_	_
TRINITY_DN10695_c3_g1	2.05195	0.632076	0	0	0	0	243	_	_	_	_	_	_	_	_	_	_	_	_	_	_	_	_	_	_	_	_	_
TRINITY_DN10696_c0_g1	0.085684	0.082678	0.059615	0	0.026035	0.147297	1238	_	_	_	_	_	_	_	_	_	_	_	_	_	_	_	_	_	_	_	_	_
TRINITY_DN10697_c0_g1	5.09884	0	0	0	0	4.18178	1168	_	_	_	_	_	_	_	_	_	_	_	_	_	_	_	_	_	_	_	_	_
TRINITY_DN10698_c0_g1	0.359603	0.102357	0.065038	0.252663	0.205299	0.115753	1345	_	_	_	_	_	_	_	_	_	_	_	_	_	_	_	_	_	_	_	_	_
TRINITY_DN10699_c0_g1	1.26929	0.14963	0.539067	0	0	0	431	_	_	_	_	_	_	_	_	_	_	_	_	_	_	_	_	_	_	_	_	_
TRINITY_DN10699_c1_g1	1.26094	0.345348	0.62177	0.9334	0.521305	0.181858	409	_	_	_	_	_	_	_	_	_	_	_	_	_	_	_	_	_	_	_	_	_
TRINITY_DN10699_c3_g1	0	1.00099	0	4.78232	0	2.61277	329	_	_	_	_	_	_	_	_	_	_	_	_	_	_	_	_	_	_	_	_	_
TRINITY_DN10699_c4_g1	0.267701	0	0	0	1.28978	0	377	_	_	_	_	_	_	_	_	_	_	_	_	_	_	_	_	_	_	_	_	_
TRINITY_DN1069_c0_g1	7.37621	0	5.62601	2.75281	0	0	3617	XP_003372753.1	XP_003372753.1 conserved hypothetical protein [Trichinella spiralis]	74.1	_	_	_	_	_	_	_	_	_	_	_	_	_	_	_	_	_	_
TRINITY_DN106_c0_g1	1.25685	1.00152	0	0	0.843716	0.954513	1150	_	_	_	_	_	_	_	_	_	_	_	_	_	_	_	_	_	_	_	_	_
TRINITY_DN106_c1_g1	0.424425	0.11639	0.139979	0.4159	0.48207	0	477	PZC71962.1	PZC71962.1 hypothetical protein B5X24_HaOG212108, partial [Helicoverpa armigera]	72.2	_	_	_	_	_	_	_	_	_	_	_	_	_	_	_	_	_	_
TRINITY_DN106_c4_g1	1.17841	0	0	0	0	0	273	_	_	_	_	_	_	_	_	_	_	_	_	_	_	_	_	_	_	_	_	_
TRINITY_DN106_c5_g1	2.28573	3.04716	1.97262	2.32437	0.93378	0.729524	369	_	_	_	_	_	_	_	_	_	_	_	_	_	_	_	_	_	_	_	_	_
TRINITY_DN10700_c0_g1	0	0	0	0.5478	1.26876	0	1177	PZC74176.1	PZC74176.1 hypothetical protein B5X24_HaOG208248 [Helicoverpa armigera]	68.3	_	_	_	_	_	_	_	_	_	_	_	_	_	_	_	_	_	_
TRINITY_DN10700_c0_g2	0.080021	0.347249	0.009355	0.460206	0.075946	0.547225	3351	_	_	_	_	_	_	_	_	_	_	_	_	_	_	_	_	_	_	_	_	_
TRINITY_DN10701_c0_g1	0	0	0	0.964389	0.890598	0.543048	686	_	_	_	_	_	_	_	_	_	_	_	_	_	_	_	_	_	_	_	_	_
TRINITY_DN10702_c0_g1	0.130594	0.174623	0.045293	0	0.116447	0	3866	_	_	_	_	_	_	_	_	_	_	_	_	_	_	_	_	_	_	_	_	_
TRINITY_DN10703_c0_g1	5.6955	0	0	7.5674	0	0	1562	_	_	_	_	_	_	_	_	_	_	_	_	_	_	_	_	_	_	_	_	_
TRINITY_DN10703_c1_g1	0	0.129354	0	0.524872	0	0.867991	1559	_	_	_	_	_	_	_	_	_	_	_	_	_	_	_	_	_	_	_	_	_
TRINITY_DN10705_c0_g1	0.48025	0	0.28205	0.294348	0	0	680	_	_	_	_	_	_	_	_	_	_	_	_	_	_	_	_	_	_	_	_	_
TRINITY_DN10706_c0_g1	0	4.77929	3.28693	0	0	7.66543	326	PCG80130.1	PCG80130.1 hypothetical protein B5V51_10983, partial [Heliothis virescens]	96.3	_	_	_	_	_	_	_	_	_	_	_	_	ko:K17079	OPA1		m.1201|TRINITY_DN10706_c0_g1:2-325(+)	internal	_
TRINITY_DN10707_c0_g1	5.41234	4.36872	3.98168	4.40883	4.52	2.60039	507	_	_	_	_	_	_	_	_	_	_	_	_	_	_	_	_	_	_	_	_	_
TRINITY_DN10708_c0_g1	1.7894	0	1.10367	3.35184	0	0	419	PZC75290.1	PZC75290.1 hypothetical protein B5X24_HaOG206492 [Helicoverpa armigera]	70.6	_	_	_	_	_	_	_	_	_	_	_	_	_	_	_	_	_	_
TRINITY_DN10708_c1_g1	0.391651	0.182485	0.077832	0.114532	0.412011	0.095551	794	_	_	_	_	_	_	_	_	_	_	_	_	_	_	_	_	_	_	_	_	_
TRINITY_DN10708_c1_g2	0.070194	0.119436	0	0.101668	0.42787	0.187938	671	_	_	_	_	_	_	_	_	_	_	_	_	_	_	_	_	_	_	_	_	_
TRINITY_DN10708_c1_g3	0.065036	0.257963	0.06004	0.239381	0.16701	0.191969	2163	_	_	_	_	_	_	_	_	_	_	_	_	_	_	_	_	_	_	_	_	_
TRINITY_DN10708_c2_g1	0.782154	0	0	0	0	0.621202	217	_	_	_	_	_	_	_	_	_	_	_	_	_	_	_	_	_	_	_	_	_
TRINITY_DN10708_c2_g2	0.859505	0.168968	0.272062	0	0	0	695	_	_	_	_	_	_	_	_	_	_	_	_	_	_	_	_	_	_	_	_	_
TRINITY_DN10708_c3_g1	0.740652	0.742229	0.502889	0.778389	0.505051	0.376261	2162	_	_	_	_	_	_	_	_	_	_	_	_	_	_	_	_	_	_	_	_	_
TRINITY_DN10708_c4_g1	0	0	0	0	0	0	262	_	_	_	_	_	_	_	_	_	_	_	_	_	_	_	_	_	_	_	_	_
TRINITY_DN10709_c0_g1	2.36076	5.88364	4.79096	5.29706	3.35683	4.29714	2028	_	_	_	_	_	_	_	_	_	_	_	_	_	_	_	_	_	_	_	_	_
TRINITY_DN10709_c1_g1	1.2475	0	0	0	0.536278	0.491893	262	_	_	_	_	_	_	_	_	_	_	_	_	_	_	_	_	_	_	_	_	_
TRINITY_DN10709_c2_g1	0	0.223073	0	0	0	0.232328	375	_	_	_	_	_	_	_	_	_	_	_	_	_	_	_	_	_	_	_	_	_
TRINITY_DN1070_c0_g1	11.7701	0	0	121.054	1.25132	0	1320	_	_	_	_	_	_	_	_	_	_	_	_	_	_	_	_	_	_	_	_	_
TRINITY_DN1070_c2_g1	2.18496	0	0	7.00469	0	0	223	_	_	_	_	_	_	_	_	_	_	_	_	_	_	_	_	_	_	_	_	_
TRINITY_DN1070_c3_g1	0	4.05988	1.6013	0	2.23598	0	245	_	_	_	_	_	_	_	_	_	_	_	_	_	_	_	_	_	_	_	_	_
TRINITY_DN10710_c0_g1	0.168964	0.086738	0.251406	0.170186	0.192025	0.077187	1681	XP_035436984.1	XP_035436984.1 superoxide dismutase [Cu-Zn]-like [Spodoptera frugiperda]	98.3	sp|Q27666|SODC_HAECO	sp|Q27666|SODC_HAECO Superoxide dismutase [Cu-Zn] OS=Haemonchus contortus OX=6289 GN=SOD PE=2 SV=1	59.9	_	_	_	_	_	_		GO:0005737|cytoplasm	GO:0004784|superoxide dismutase activity;GO:0046872|metal ion binding	ko:K04565	SOD1	path:ko04146;path:ko04213;path:ko05014;path:ko05016;path:ko05020	m.1178|TRINITY_DN10710_c0_g1:909-1628(+)	complete	PF00080.17|Sod_Cu|Copper/zinc superoxide dismutase (SODC)|TRINITY_DN10710_c0_g1_i4|m.1178:98-235
TRINITY_DN10711_c0_g1	0	0	8.86177	3.09022	0	0	413	_	_	_	_	_	_	_	_	_	_	_	_	_	_	_	_	_	_	_	_	_
TRINITY_DN10711_c0_g2	2.10747	1.40003	0	3.39344	0	0	224	_	_	_	_	_	_	_	_	_	_	_	_	_	_	_	_	_	_	_	_	_
TRINITY_DN10711_c1_g1	0.619514	0.428957	0.930528	0.220748	0.745058	0.217613	550	_	_	_	_	_	_	_	_	_	_	_	_	_	_	_	_	_	_	_	_	_
TRINITY_DN10711_c3_g1	0	0	0	0	0.917682	0	401	_	_	_	_	_	_	_	_	_	_	_	_	_	_	_	_	_	_	_	_	_
TRINITY_DN10711_c4_g1	1.02466	4.89318	1.64917	0.32288	2.14772	0.827821	296	_	_	_	_	_	_	_	_	_	_	_	_	_	_	_	_	_	_	_	_	_
TRINITY_DN10711_c5_g1	0.055506	0.189815	0.057327	0.078842	0.389071	0	774	_	_	_	_	_	_	_	_	_	_	_	_	_	_	_	_	_	_	_	_	_
TRINITY_DN10711_c6_g1	0	1.0285	0.41624	0	0	0	326	_	_	_	_	_	_	_	_	_	_	_	_	_	_	_	_	_	_	_	_	_
TRINITY_DN10712_c0_g1	1.53009	0.150752	1.45698	0	0	1.62986	746	_	_	_	_	_	_	_	_	_	_	_	_	_	_	_	_	_	_	_	_	_
TRINITY_DN10713_c0_g1	0.36409	0.3408	0.448553	0.195031	0.64987	0.31302	1071	_	_	_	_	_	_	_	_	_	_	_	_	_	_	_	_	_	_	_	_	_
TRINITY_DN10714_c0_g1	12.7869	7.03244	6.9153	7.24564	6.86816	3.33454	328	_	_	_	_	_	_	_	_	_	_	_	_	_	_	_	_	_	_	_	_	_
TRINITY_DN10715_c0_g1	2.51095	2.79381	0.528389	1.19473	2.95697	2.26803	435	XP_021191927.1	XP_021191927.1 AMP deaminase 2 isoform X6 [Helicoverpa armigera]	100	_	_	_	_	_	_	_	_	_	_	_	_	ko:K01490	AMPD	path:ko00230;path:ko01100;path:ko01110;path:ko01130	_	_	_
TRINITY_DN10716_c0_g1	0	5.99061	14.0698	0	8.90913	3.33287	210	_	_	_	_	_	_	_	_	_	_	_	_	_	_	_	_	_	_	_	_	_
TRINITY_DN10717_c0_g1	0	0	0	1.31067	0	1.38125	201	_	_	_	_	_	_	_	_	_	_	_	_	_	_	_	_	_	_	_	_	_
TRINITY_DN10718_c0_g1	0	9.03572	0	0.269724	3.70796	3.23474	337	_	_	_	_	_	_	_	_	_	_	_	_	_	_	_	_	_	_	_	_	_
TRINITY_DN10719_c0_g1	0.12272	0.421305	0.382135	0.260012	0.18022	0.183603	950	_	_	_	_	_	_	_	_	_	_	_	_	_	_	_	_	_	_	_	_	_
TRINITY_DN1071_c0_g1	0.175983	2.10046	0.907718	0	1.21279	0.565665	983	XP_035452654.1	XP_035452654.1 uncharacterized protein LOC118277819 [Spodoptera frugiperda]	97.3	_	_	_	_	_	_	_	_	_	_	_	_	_	_	_	m.435|TRINITY_DN1071_c0_g1:269-643(+);m.436|TRINITY_DN1071_c0_g1:646-981(+)	complete;3prime_partial	_
TRINITY_DN1071_c0_g2	0.123433	0.206576	7.58868	5.93365	0	0	503	_	_	_	_	_	_	_	_	_	_	_	_	_	_	_	_	_	_	_	_	_
TRINITY_DN1071_c0_g3	7.1045	3.21505	1.66818	5.06266	0.37886	3.83892	3318	_	_	_	_	_	_	_	_	_	_	_	_	_	_	_	_	_	_	_	_	_
TRINITY_DN10720_c0_g1	72.9378	52.268	49.7962	43.1886	55.1593	30.2896	460	BAM76813.1	BAM76813.1 Drosophila cueball like protein, partial [Mythimna separata]	73.4	_	_	_	_	_	_	_	_	_	_	_	_	_	_	_	m.1199|TRINITY_DN10720_c0_g1:1-459(+)	internal	PF12661.4|hEGF|Human growth factor-like EGF|TRINITY_DN10720_c0_g1_i14|m.1199:100-112;PF12661.4|hEGF|Human growth factor-like EGF|TRINITY_DN10720_c0_g1_i14|m.1199:136-148
TRINITY_DN10720_c1_g1	1.88118	0.362288	0.144881	0.881053	0.310214	0.127412	470	_	_	_	_	_	_	_	_	_	_	_	_	_	_	_	_	_	_	_	_	_
TRINITY_DN10720_c3_g1	0.811626	0	1.60345	0	0	0	245	_	_	_	_	_	_	_	_	_	_	_	_	_	_	_	_	_	_	_	_	_
TRINITY_DN10722_c0_g1	7.06514	5.38774	3.72368	4.27436	0	7.05731	477	_	_	_	_	_	_	_	_	_	_	_	_	_	_	_	_	_	_	_	_	_
TRINITY_DN10722_c1_g1	77.332	94.5041	0	0	79.0336	56.2259	258	_	_	_	_	_	_	_	_	_	_	_	_	_	_	_	_	_	_	_	_	_
TRINITY_DN10722_c2_g1	2.60705	0	5.33569	0	0	5.64268	253	_	_	_	_	_	_	_	_	_	_	_	_	_	_	_	_	_	_	_	_	_
TRINITY_DN10722_c3_g1	0	0.807254	0	0	0	0	201	_	_	_	_	_	_	_	_	_	_	_	_	_	_	_	_	_	_	_	_	_
TRINITY_DN10724_c0_g1	0.909233	1.87332	1.40501	5.19838	2.47273	0.705781	463	_	_	_	_	_	_	_	_	_	_	_	_	_	_	_	_	_	_	_	_	_
TRINITY_DN10725_c0_g1	0	0	4.39482	0	1.91919	1.74233	228	_	_	_	_	_	_	_	_	_	_	_	_	_	_	_	_	_	_	_	_	_
TRINITY_DN10726_c0_g1	52.9116	51.9857	54.3766	33.7826	51.8331	32.1686	1766	XP_021201700.1	XP_021201700.1 protein CDV3 homolog [Helicoverpa armigera]	95.8	sp|O16053|CDV3_DROYA	sp|O16053|CDV3_DROYA Protein CDV3 homolog OS=Drosophila yakuba OX=7245 GN=GE14456 PE=2 SV=1	43.1	_	_	_	_	_	_	_	_	_	_	_	_	m.1167|TRINITY_DN10726_c0_g1:180-824(+)	complete	PF15359.3|CDV3|Carnitine deficiency-associated protein 3|TRINITY_DN10726_c0_g1_i1|m.1167:60-177
TRINITY_DN10726_c1_g1	3.21194	2.86389	1.41038	2.39287	2.65374	1.16003	483	_	_	_	_	_	_	_	_	_	_	_	_	_	_	_	_	_	_	_	_	_
TRINITY_DN10726_c2_g1	1.49063	0.692701	0	0	0.64504	0	226	_	_	_	_	_	_	_	_	_	_	_	_	_	_	_	_	_	_	_	_	_
TRINITY_DN10727_c0_g1	0	1.60824	0	0	0	0	338	_	_	_	_	_	_	_	_	_	_	_	_	_	_	_	_	_	_	_	_	_
TRINITY_DN10728_c0_g1	2.22903	1.08819	1.74315	0.737591	1.03996	2.92128	293	_	_	_	_	_	_	_	_	_	_	_	_	_	_	_	_	_	_	_	_	_
TRINITY_DN10728_c1_g1	0.308989	0.128221	0	0.113633	0.380763	0.270692	458	_	_	_	_	_	_	_	_	_	_	_	_	_	_	_	_	_	_	_	_	_
TRINITY_DN10729_c0_g1	0	0.292895	0	0	0.195849	0	547	_	_	_	_	_	_	_	_	_	_	_	_	_	_	_	_	_	_	_	_	_
TRINITY_DN10729_c0_g2	0.773995	0.435832	0.530537	0.353859	0.974434	0.55034	2281	_	_	_	_	_	_	_	_	_	_	_	_	_	_	_	_	_	_	_	_	_
TRINITY_DN10729_c0_g3	1.73727	2.81104	2.08983	2.3263	4.20497	4.73646	2105	_	_	_	_	_	_	_	_	_	_	_	_	_	_	_	_	_	_	_	_	_
TRINITY_DN10729_c1_g1	0	0	0.980843	1.78503	0	1.95137	210	_	_	_	_	_	_	_	_	_	_	_	_	_	_	_	_	_	_	_	_	_
TRINITY_DN10729_c2_g1	48.1133	44.9125	41.3743	29.7779	37.7865	20.3748	231	XP_013190665.1	XP_013190665.1 PREDICTED: protein cueball [Amyelois transitella]	73.2	_	_	_	_	_	_	_	_	_	_	_	_	_	_	_	_	_	_
TRINITY_DN10729_c3_g1	0	0	0.892711	0	0	0.587577	226	_	_	_	_	_	_	_	_	_	_	_	_	_	_	_	_	_	_	_	_	_
TRINITY_DN10729_c4_g1	0	0	0	1.10939	0	0	219	_	_	_	_	_	_	_	_	_	_	_	_	_	_	_	_	_	_	_	_	_
TRINITY_DN10729_c5_g1	0	0	0	0.923666	0	0	247	_	_	_	_	_	_	_	_	_	_	_	_	_	_	_	_	_	_	_	_	_
TRINITY_DN1072_c0_g1	0	0	0	0	0	0	2866	XP_035454549.1	XP_035454549.1 uncharacterized protein LOC118279123 [Spodoptera frugiperda]	56.2	_	_	_	_	_	_	_	_	_	_	_	_	_	_	_	_	_	_
TRINITY_DN1072_c0_g2	2.13639	2.63905	1.6974	1.48996	1.23199	0	235	_	_	_	_	_	_	_	_	_	_	_	_	_	_	_	_	_	_	_	_	_
TRINITY_DN1072_c0_g3	8.23385	8.38621	5.59681	6.34017	7.12659	6.67677	1564	PCG78574.1	PCG78574.1 hypothetical protein B5V51_3799 [Heliothis virescens]	98.8	sp|Q9VQG2|APH1_DROME	sp|Q9VQG2|APH1_DROME Gamma-secretase subunit Aph-1 OS=Drosophila melanogaster OX=7227 GN=aph-1 PE=1 SV=1	76.4	_	_	_	_	_	_	GO:0006509|membrane protein ectodomain proteolysis;GO:0007219|Notch signaling pathway;GO:0007220|Notch receptor processing;GO:0016485|protein processing;GO:0034205|amyloid-beta formation;GO:0035333|Notch receptor processing, ligand-dependent;GO:0043085|positive regulation of catalytic activity;GO:0050821|protein stabilization	GO:0005770|late endosome;GO:0005783|endoplasmic reticulum;GO:0005887|integral component of plasma membrane;GO:0055037|recycling endosome;GO:0070765|gamma-secretase complex	GO:0004175|endopeptidase activity	ko:K06172	APH1A	path:ko04330;path:ko05010	m.650|TRINITY_DN1072_c0_g3:263-985(+)	complete	PF06105.9|Aph-1|Aph-1 protein|TRINITY_DN1072_c0_g3_i1|m.650:2-232
TRINITY_DN1072_c12_g1	4.16519	1.17795	2.06518	0.636878	2.968	2.07582	202	_	_	_	_	_	_	_	_	_	_	_	_	_	_	_	_	_	_	_	_	_
TRINITY_DN1072_c1_g1	0.203187	0	0	0.933966	0.335332	0.49712	2421	KAF9788858.1	KAF9788858.1 hypothetical protein SFRURICE_018434 [Spodoptera frugiperda]	97.1	_	_	_	_	_	_	_	_	_	_	_	_	ko:K21403	PXYLP1		m.652|TRINITY_DN1072_c1_g1:2-1345(+)	5prime_partial	PF00328.19|His_Phos_2|Histidine phosphatase superfamily (branch 2)|TRINITY_DN1072_c1_g1_i1|m.652:209-375
TRINITY_DN1072_c7_g1	1.95463	1.0547	1.91279	1.14991	0.535365	1.3153	1622	_	_	_	_	_	_	_	_	_	_	_	_	_	_	_	_	_	_	_	_	_
TRINITY_DN10730_c0_g1	0.751817	0	1.97184	3.01986	1.51827	0.470024	272	_	_	_	_	_	_	_	_	_	_	_	_	_	_	_	_	_	_	_	_	_
TRINITY_DN10730_c1_g1	0.072396	0.656072	0.446163	0.163702	6.29624	0	660	_	_	_	_	_	_	_	_	_	_	_	_	_	_	_	_	_	_	_	_	_
TRINITY_DN10731_c0_g1	0.356009	571.264	0.176492	760.055	0	0	434	_	_	_	_	_	_	_	_	_	_	_	_	_	_	_	_	_	_	_	_	_
TRINITY_DN10732_c0_g1	0	2.18552	0	3.17978	0	2.12829	776	_	_	_	_	_	_	_	_	_	_	_	_	_	_	_	_	_	_	_	_	_
TRINITY_DN10733_c0_g1	1.26676	0.951738	0.262149	0.335497	1.22412	1.84087	575	_	_	_	_	_	_	_	_	_	_	_	_	_	_	_	_	_	_	_	_	_
TRINITY_DN10733_c0_g2	4.68771	8.74491	5.12206	4.68149	4.85623	6.60584	494	_	_	_	_	_	_	_	_	_	_	_	_	_	_	_	_	_	_	_	_	_
TRINITY_DN10734_c0_g1	0	6.63786	0	10.803	0	3.91972	376	_	_	_	_	_	_	_	_	_	_	_	_	_	_	_	_	_	_	_	_	_
TRINITY_DN10735_c0_g1	0	7.10144	10.5123	0	9.03497	0	283	_	_	_	_	_	_	_	_	_	_	_	_	_	_	_	_	_	_	_	_	_
TRINITY_DN10736_c0_g1	0	3.83426	0	0.949917	0	0	241	_	_	_	_	_	_	_	_	_	_	_	_	_	_	_	_	_	_	_	_	_
TRINITY_DN10737_c0_g1	0	1.01642	0	3.10963	0	1.83959	767	_	_	_	_	_	_	_	_	_	_	_	_	_	_	_	_	_	_	_	_	_
TRINITY_DN10737_c1_g1	2.09067	0.681689	5.53936	0.718467	1.22764	1.26348	293	_	_	_	_	_	_	_	_	_	_	_	_	_	_	_	_	_	_	_	_	_
TRINITY_DN10737_c2_g1	0	0	0	0.633987	0	0.486349	369	_	_	_	_	_	_	_	_	_	_	_	_	_	_	_	_	_	_	_	_	_
TRINITY_DN10737_c2_g2	0	0	0	0.258487	0	0	733	_	_	_	_	_	_	_	_	_	_	_	_	_	_	_	_	_	_	_	_	_
TRINITY_DN10737_c3_g1	0.386434	0.42184	0.088117	0.317646	0.119714	0.151728	1907	PZC82307.1	PZC82307.1 hypothetical protein B5X24_HaOG210610 [Helicoverpa armigera]	55.5	_	_	_	_	_	_	_	_	_	_	_	_	_	_	_	_	_	_
TRINITY_DN10737_c4_g1	0.250241	0	0.629753	0.455747	0	0	500	_	_	_	_	_	_	_	_	_	_	_	_	_	_	_	_	_	_	_	_	_
TRINITY_DN10737_c5_g1	0	0	0	0.228434	0.506653	0	359	_	_	_	_	_	_	_	_	_	_	_	_	_	_	_	_	_	_	_	_	_
TRINITY_DN10737_c6_g1	8.26925	8.48041	4.47678	4.21791	2.46205	5.59774	241	_	_	_	_	_	_	_	_	_	_	_	_	_	_	_	_	_	_	_	_	_
TRINITY_DN10737_c7_g1	0	0	0	0	0	0	236	_	_	_	_	_	_	_	_	_	_	_	_	_	_	_	_	_	_	_	_	_
TRINITY_DN10738_c0_g1	0	4.45904	2.80658	2.57323	0	2.11599	438	_	_	_	_	_	_	_	_	_	_	_	_	_	_	_	_	_	_	_	_	_
TRINITY_DN10739_c0_g1	0	0	2.48616	0	0	5.05908	343	XP_026752406.2	XP_026752406.2 chloride channel protein 2-like [Galleria mellonella]	98.2	sp|Q9VGH7|CLCN2_DROME	sp|Q9VGH7|CLCN2_DROME Chloride channel protein 2 OS=Drosophila melanogaster OX=7227 GN=ClC-a PE=2 SV=3	79.8	_	_	_	_	_	_	GO:0003091|renal water homeostasis;GO:0003097|renal water transport;GO:0006821|chloride transport;GO:0030321|transepithelial chloride transport;GO:0034765|regulation of ion transmembrane transport;GO:0035377|transepithelial water transport;GO:1902476|chloride transmembrane transport	GO:0005887|integral component of plasma membrane;GO:0009925|basal plasma membrane;GO:0015629|actin cytoskeleton;GO:0016324|apical plasma membrane;GO:0034707|chloride channel complex	GO:0005247|voltage-gated chloride channel activity;GO:0005254|chloride channel activity	ko:K05011	CLCN2	path:ko04978	m.1170|TRINITY_DN10739_c0_g1:2-343(+)	internal	PF00654.17|Voltage_CLC|Voltage gated chloride channel|TRINITY_DN10739_c0_g1_i1|m.1170:1-88
TRINITY_DN1073_c0_g1	2.20729	3.39883	2.34946	3.66713	3.8375	2.84576	3174	_	_	_	_	_	_	_	_	_	_	_	_	_	_	_	_	_	_	_	_	_
TRINITY_DN1073_c1_g1	0.12744	0.213038	0.640925	0.464575	0.433318	0.112291	496	_	_	_	_	_	_	_	_	_	_	_	_	_	_	_	_	_	_	_	_	_
TRINITY_DN10740_c0_g1	7.84922	0	4.32378	2.23849	0.224426	1.64834	374	_	_	_	_	_	_	_	_	_	_	_	_	_	_	_	_	_	_	_	_	_
TRINITY_DN10741_c0_g1	0	0.057971	5.00146	3.02566	5.41526	0	683	RNA12183.1	RNA12183.1 hypothetical protein BpHYR1_005888 [Brachionus plicatilis]	49.7	_	_	_	_	_	_	_	_	_	_	_	_	_	_	_	_	_	_
TRINITY_DN10742_c0_g1	0	0	8.5024	7.06192	6.97709	0	391	_	_	_	_	_	_	_	_	_	_	_	_	_	_	_	_	_	_	_	_	_
TRINITY_DN10743_c0_g1	0	3.9847	0	5.7047	2.328	0	369	_	_	_	_	_	_	_	_	_	_	_	_	_	_	_	_	_	_	_	_	_
TRINITY_DN10744_c0_g1	2.41155	3.46296	0	0	0	1.28734	531	_	_	_	_	_	_	_	_	_	_	_	_	_	_	_	_	_	_	_	_	_
TRINITY_DN10746_c0_g1	0	0	0	0	0	3.11097	283	_	_	_	_	_	_	_	_	_	_	_	_	_	_	_	_	_	_	_	_	_
TRINITY_DN10747_c0_g1	1.95461	2.10422	0.594686	2.35041	4.07295	1.20908	968	_	_	_	_	_	_	_	_	_	_	_	_	_	_	_	_	_	_	_	_	_
TRINITY_DN10748_c0_g1	0	0	4.66556	0	3.37667	3.27841	365	_	_	_	_	_	_	_	_	_	_	_	_	_	_	_	_	_	_	_	_	_
TRINITY_DN10749_c0_g1	2.68554	2.46448	2.82996	1.86456	4.78115	2.3629	485	_	_	_	_	_	_	_	_	_	_	_	_	_	_	_	_	_	_	_	_	_
TRINITY_DN1074_c0_g1	1.48263	1.95329	1.10771	0.404576	1.45897	2.28331	1104	_	_	_	_	_	_	_	_	_	_	_	_	_	_	_	_	_	_	_	_	_
TRINITY_DN1074_c1_g1	0	0.561249	0	0.345309	0	0	2836	_	_	_	_	_	_	_	_	_	_	_	_	_	_	_	_	_	_	_	_	_
TRINITY_DN1074_c2_g1	0.876442	0.976364	0.265892	0.156475	0.535759	0.711934	2399	_	_	_	_	_	_	_	_	_	_	_	_	_	_	_	_	_	_	_	_	_
TRINITY_DN1074_c3_g1	1.00769	1.3969	0.627394	0.178613	1.08116	1.10795	473	_	_	_	_	_	_	_	_	_	_	_	_	_	_	_	_	_	_	_	_	_
TRINITY_DN10750_c0_g1	1.10652	0.80687	0.415913	0	2.92701	1.09431	479	_	_	_	_	_	_	_	_	_	_	_	_	_	_	_	_	_	_	_	_	_
TRINITY_DN10751_c0_g1	2.89807	1.48492	1.65079	0.88309	2.57839	1.62001	1040	_	_	_	_	_	_	_	_	_	_	_	_	_	_	_	_	_	_	_	_	_
TRINITY_DN10751_c0_g2	0	0	0	1.64415	0.999767	0.882801	1108	_	_	_	_	_	_	_	_	_	_	_	_	_	_	_	_	_	_	_	_	_
TRINITY_DN10752_c0_g1	1.05988	1.16522	0.497695	1.50645	1.43223	0.329759	1024	_	_	_	_	_	_	_	_	_	_	_	_	_	_	_	_	_	_	_	_	_
TRINITY_DN10753_c0_g1	0.54849	0.669748	0.329309	0.477172	0.979335	0.344118	2721	PCG75007.1	PCG75007.1 hypothetical protein B5V51_12407 [Heliothis virescens]	80.3	_	_	_	_	_	_	_	_	_	_	_	_	_	_	_	m.1158|TRINITY_DN10753_c0_g1:230-2638(+)	complete	PF05485.9|THAP|THAP domain|TRINITY_DN10753_c0_g1_i1|m.1158:3-81;PF07776.12|zf-AD|Zinc-finger associated domain (zf-AD)|TRINITY_DN10753_c0_g1_i1|m.1158:99-165
TRINITY_DN10754_c0_g1	11.8844	14.3204	13.5884	13.7599	10.9172	9.62755	1197	_	_	_	_	_	_	_	_	_	_	_	_	_	_	_	_	_	_	m.1179|TRINITY_DN10754_c0_g1:474-803(+)	complete	_
TRINITY_DN10755_c0_g1	0.810325	0.987651	3.30072	0.431024	0.396641	0.462602	821	PZC79959.1	PZC79959.1 hypothetical protein B5X24_HaOG215549 [Helicoverpa armigera]	80	_	_	_	_	_	_	_	_	_	_	_	_	_	_	_	_	_	_
TRINITY_DN10755_c0_g2	1.82649	0.667519	0.184751	1.50688	2.35478	0	414	_	_	_	_	_	_	_	_	_	_	_	_	_	_	_	_	_	_	_	_	_
TRINITY_DN10755_c0_g3	0.764305	0.731544	0.276739	0.608856	0.328694	0.57553	792	PZC79959.1	PZC79959.1 hypothetical protein B5X24_HaOG215549 [Helicoverpa armigera]	83.1	_	_	_	_	_	_	_	_	_	_	_	_	_	_	_	_	_	_
TRINITY_DN10755_c1_g1	0	0	0	0	0	0.220461	725	_	_	_	_	_	_	_	_	_	_	_	_	_	_	_	_	_	_	_	_	_
TRINITY_DN10755_c2_g1	0	1.02217	0	0	0	0	278	_	_	_	_	_	_	_	_	_	_	_	_	_	_	_	_	_	_	_	_	_
TRINITY_DN10756_c0_g1	1.83231	0	0	0.3693	0	0	465	_	_	_	_	_	_	_	_	_	_	_	_	_	_	_	_	_	_	_	_	_
TRINITY_DN10757_c0_g1	0.284181	0.271987	0.296166	0.177806	0.251478	0.085242	1147	_	_	_	_	_	_	_	_	_	_	_	_	_	_	_	_	_	_	_	_	_
TRINITY_DN10758_c0_g1	0	0.858849	0	1.65004	0	0	522	_	_	_	_	_	_	_	_	_	_	_	_	_	_	_	_	_	_	_	_	_
TRINITY_DN10758_c0_g2	0.867711	0	0.422477	0.217154	0.672122	0	817	_	_	_	_	_	_	_	_	_	_	_	_	_	_	_	_	_	_	_	_	_
TRINITY_DN10758_c0_g3	1.06146	2.08553	1.01454	0.633055	0.860774	0.824964	811	RVE53044.1	RVE53044.1 hypothetical protein evm_002342 [Chilo suppressalis]	65.8	_	_	_	_	_	_	_	_	_	_	_	_	_	_	_	m.1168|TRINITY_DN10758_c0_g3:1-315(+)	5prime_partial	_
TRINITY_DN10758_c1_g1	1.30966	3.16446	2.50172	0	0	0.55064	238	_	_	_	_	_	_	_	_	_	_	_	_	_	_	_	_	_	_	_	_	_
TRINITY_DN10758_c2_g1	0	0.202819	0.913219	0.183883	0	0.637214	387	_	_	_	_	_	_	_	_	_	_	_	_	_	_	_	_	_	_	_	_	_
TRINITY_DN10758_c2_g2	0	0.121779	0.194422	0	0	0	802	_	_	_	_	_	_	_	_	_	_	_	_	_	_	_	_	_	_	_	_	_
TRINITY_DN10758_c3_g1	2.02188	0.438027	0.540085	0.698025	2.11572	0.409115	298	_	_	_	_	_	_	_	_	_	_	_	_	_	_	_	_	_	_	_	_	_
TRINITY_DN10758_c4_g1	0	0	0	32.2837	0	0	340	_	_	_	_	_	_	_	_	_	_	_	_	_	_	_	_	_	_	_	_	_
TRINITY_DN10758_c5_g1	0	1.02451	0	1.70846	0	0.873804	415	_	_	_	_	_	_	_	_	_	_	_	_	_	_	_	_	_	_	_	_	_
TRINITY_DN10758_c6_g1	3.35991	2.12574	0	0	0.560186	0	254	_	_	_	_	_	_	_	_	_	_	_	_	_	_	_	_	_	_	_	_	_
TRINITY_DN10758_c7_g1	0.188474	0	0.932523	0	0.156786	0	425	_	_	_	_	_	_	_	_	_	_	_	_	_	_	_	_	_	_	_	_	_
TRINITY_DN10758_c8_g1	2.3328	0	0	0	0	0	218	_	_	_	_	_	_	_	_	_	_	_	_	_	_	_	_	_	_	_	_	_
TRINITY_DN10758_c9_g1	0	0	0.355034	0.264978	0	0.156029	433	_	_	_	_	_	_	_	_	_	_	_	_	_	_	_	_	_	_	_	_	_
TRINITY_DN10759_c0_g1	6.38258	4.37387	5.31563	3.2378	5.17116	2.52091	1052	_	_	_	_	_	_	_	_	_	_	_	_	_	_	_	_	_	_	_	_	_
TRINITY_DN1075_c0_g1	5.389	3.04729	3.38842	2.7264	0.091101	0	1761	_	_	_	_	_	_	_	_	_	_	_	_	_	_	_	_	_	_	_	_	_
TRINITY_DN1075_c1_g1	1.43331	1.40699	0.548448	0.90141	1.33097	0.59198	4402	XP_021182405.1	XP_021182405.1 2-(3-amino-3-carboxypropyl)histidine synthase subunit 1 [Helicoverpa armigera]	97	sp|A7SLX5|DPH1_NEMVE	sp|A7SLX5|DPH1_NEMVE 2-(3-amino-3-carboxypropyl)histidine synthase subunit 1 OS=Nematostella vectensis OX=45351 GN=dph1 PE=3 SV=1	77.8	_	_	_	_	_	_	GO:0017183|peptidyl-diphthamide biosynthetic process from peptidyl-histidine		GO:0016740|transferase activity	ko:K07561	DPH1, dph2		m.3033|TRINITY_DN1075_c1_g1:2787-3788(+)	complete	PF01866.14|Diphthamide_syn|Putative diphthamide synthesis protein|TRINITY_DN1075_c1_g1_i3|m.3033:1-288
TRINITY_DN1075_c2_g1	0	0	0	0.707121	0	0	355	_	_	_	_	_	_	_	_	_	_	_	_	_	_	_	_	_	_	_	_	_
TRINITY_DN10760_c0_g1	1.12421	0.860717	0	0.384876	0.581113	0.151454	438	_	_	_	_	_	_	_	_	_	_	_	_	_	_	_	_	_	_	_	_	_
TRINITY_DN10760_c1_g1	2.52168	0	0	0	0	0	206	_	_	_	_	_	_	_	_	_	_	_	_	_	_	_	_	_	_	_	_	_
TRINITY_DN10761_c0_g1	0	12.3199	10.9957	6.09903	0	0	207	_	_	_	_	_	_	_	_	_	_	_	_	_	_	_	_	_	_	_	_	_
TRINITY_DN10762_c0_g1	0.315844	0.046606	0	0.152184	0.121189	0	1166	BAM20539.1	BAM20539.1 titin, partial [Papilio polytes]	92	_	_	_	_	_	_	_	_	_	_	_	_	_	_	_	_	_	_
TRINITY_DN10763_c0_g1	6.8627	6.91262	5.42202	5.70442	6.47049	2.90941	3984	_	_	_	_	_	_	_	_	_	_	_	_	_	_	_	_	_	_	_	_	_
TRINITY_DN10763_c1_g1	0.803123	0.620064	0.621945	0.339136	0.581427	0.057634	906	_	_	_	_	_	_	_	_	_	_	_	_	_	_	_	_	_	_	_	_	_
TRINITY_DN10763_c1_g2	1.33851	0.893151	1.31835	0.794362	1.11219	0.45766	377	_	_	_	_	_	_	_	_	_	_	_	_	_	_	_	_	_	_	_	_	_
TRINITY_DN10763_c1_g3	0	0.796197	0	0	0	0	203	_	_	_	_	_	_	_	_	_	_	_	_	_	_	_	_	_	_	_	_	_
TRINITY_DN10763_c3_g1	0	3.91783	0	2.45185	0	0.55342	237	_	_	_	_	_	_	_	_	_	_	_	_	_	_	_	_	_	_	_	_	_
TRINITY_DN10764_c0_g1	0	1.27343	0	0.642164	0.746963	0	201	_	_	_	_	_	_	_	_	_	_	_	_	_	_	_	_	_	_	_	_	_
TRINITY_DN10764_c1_g1	0	0	0.408515	0.287596	0	0	328	_	_	_	_	_	_	_	_	_	_	_	_	_	_	_	_	_	_	_	_	_
TRINITY_DN10765_c0_g1	0	0.823382	0	1.70586	0	1.69429	706	CAB3223506.1	CAB3223506.1 unnamed protein product [Arctia plantaginis]	79	_	_	_	_	_	_	_	_	_	_	_	_	_	_	_	m.1200|TRINITY_DN10765_c0_g1:113-568(+)	complete	_
TRINITY_DN10766_c0_g1	2.16183	0	1.28569	0	1.62334	0	742	_	_	_	_	_	_	_	_	_	_	_	_	_	_	_	_	_	_	_	_	_
TRINITY_DN10766_c0_g2	0.183051	0.105162	0.031815	0.086705	0.135086	0.054936	1177	_	_	_	_	_	_	_	_	_	_	_	_	_	_	_	_	_	_	m.1171|TRINITY_DN10766_c0_g2:255-974(+)	complete	_
TRINITY_DN10767_c0_g1	13.3568	16.8261	14.207	13.7844	11.6431	8.42024	2416	_	_	_	_	_	_	_	_	_	_	_	_	_	_	_	_	_	_	_	_	_
TRINITY_DN10768_c0_g1	0.08762	0	0.350905	0	0.531272	0	3080	_	_	_	_	_	_	_	_	_	_	_	_	_	_	_	_	_	_	_	_	_
TRINITY_DN10768_c0_g2	0.189716	0.312641	0	0	0	0	424	_	_	_	_	_	_	_	_	_	_	_	_	_	_	_	_	_	_	_	_	_
TRINITY_DN10769_c0_g1	0	0.638607	0	0.551455	0	0.313497	641	_	_	_	_	_	_	_	_	_	_	_	_	_	_	_	_	_	_	_	_	_
TRINITY_DN1076_c0_g1	0.905136	2.37886	0.828766	2.13251	0.829344	1.53405	6092	XP_035450404.1	XP_035450404.1 uncharacterized protein LOC118276263 isoform X1 [Spodoptera frugiperda]	89.7	_	_	_	_	_	_	_	_	_	_	_	_	_	_	_	m.422|TRINITY_DN1076_c0_g1:511-2472(+)	complete	_
TRINITY_DN1076_c0_g2	1.0745	0	0	0.26012	0	0	342	_	_	_	_	_	_	_	_	_	_	_	_	_	_	_	_	_	_	_	_	_
TRINITY_DN1076_c0_g3	0	0	0.993081	0	0	0	208	_	_	_	_	_	_	_	_	_	_	_	_	_	_	_	_	_	_	_	_	_
TRINITY_DN10770_c0_g1	0.929315	1.02312	0.272607	0.156272	0.198495	0.234887	1751	PZC81661.1	PZC81661.1 hypothetical protein B5X24_HaOG212367 [Helicoverpa armigera]	98.6	sp|Q25452|CAC1M_MUSDO	sp|Q25452|CAC1M_MUSDO Muscle calcium channel subunit alpha-1 OS=Musca domestica OX=7370 PE=2 SV=1	83.4	_	_	_	_	_	_	GO:0034765|regulation of ion transmembrane transport	GO:0005891|voltage-gated calcium channel complex	GO:0005245|voltage-gated calcium channel activity;GO:0046872|metal ion binding	ko:K04851	CACNA1D	path:ko04010;path:ko04020;path:ko04022;path:ko04024;path:ko04260;path:ko04261;path:ko04270;path:ko04530;path:ko04713;path:ko04723;path:ko04724;path:ko04725;path:ko04726;path:ko04727;path:ko04728;path:ko04911;path:ko04912;path:ko04921;path:ko04924;path:ko04925;path:ko04930;path:ko04973;path:ko05010;path:ko05031;path:ko05410;path:ko05412;path:ko05414	m.1173|TRINITY_DN10770_c0_g1:642-1751(+)	3prime_partial	PF00520.28|Ion_trans|Ion transport protein|TRINITY_DN10770_c0_g1_i1|m.1173:83-361
TRINITY_DN10771_c0_g1	1.03173	0.667725	0.636133	0.574975	0.788535	0.362748	1234	_	_	_	_	_	_	_	_	_	_	_	_	_	_	_	_	_	_	_	_	_
TRINITY_DN10771_c0_g2	0	0	6.56837	2.61468	8.69566	0	335	XP_032512747.1	XP_032512747.1 uncharacterized protein LOC116766766 [Danaus plexippus plexippus]	85.7	_	_	_	_	_	_	_	_	_	_	_	_	_	_	_	m.1184|TRINITY_DN10771_c0_g2:24-335(+)	3prime_partial	_
TRINITY_DN10771_c0_g3	1.02605	1.68588	0.625299	0.382777	0.125676	0.789141	640	_	_	_	_	_	_	_	_	_	_	_	_	_	_	_	_	_	_	_	_	_
[truncated: 94,196 more rows]
