# Supplementary material for: Multi-Omics Reveals the Effect of Population Density on the Phenotype, Transcriptome and Metabolome of Mythimna separata
Source: Insects. 2023 Jan 10;14(1):68. doi: 10.3390/insects14010068 (PMC9861010; doi:10.3390/insects14010068)
Supplement: Supplementary file 1 [file insects-14-00068-s001.zip › Table S4.xlsx]

## Sheet: B_vs_A
ID	adduct	Name	VIP	Fold change	p-value	m/z	rt(s)	HMDB	KEGG	SuperClass	Class	SubClass	S-1	S-2	S-3	S-4	S-5	S-6	G-1	G-2	G-3	G-4	G-5	G-6	QC-1	QC-2	QC-3
M279T30	[M+H]+	Dibutyl phthalate	1.33993	2.44588	2.89237e-06	279.159	29.7985	HMDB0033244	C14214	Benzenoids	Benzene and substituted derivatives	Benzoic acids and derivatives	24898.4	30903.6	22300.5	26087.7	22984.5	17143.5	52111.2	65895.1	49581.9	54747.1	61555.2	69094.7	23758.9	22564.2	22522.7
M118T289	[M+H]+	DL-valine	4.72298	0.358127	3.35285e-05	118.086	288.957	HMDB0000883	C00183	Organic acids and derivatives	Carboxylic acids and derivatives	Amino acids, peptides, and analogues	864176	607003	639127	515325	831903	683681	280468	159607	171980	298248	344117	228660	480220	492497	480192
M118T263_2	[M+H]+	Betaine	15.4224	0.409812	4.88271e-05	118.087	263.011	HMDB0000043	C00719	Organic acids and derivatives	Carboxylic acids and derivatives	Amino acids, peptides, and analogues	1.00758e+07	7.58546e+06	6.88141e+06	5.86449e+06	8.43113e+06	9.22344e+06	3.93933e+06	2.66673e+06	3.27098e+06	3.78881e+06	3.85744e+06	2.17297e+06	6.07779e+06	6.12307e+06	6.04816e+06
M229T356	[M+H]+	Pro-leu	1.9129	0.255309	0.000128722	229.154	356.022			Organic acids and derivatives	Carboxylic acids and derivatives	Amino acids, peptides, and analogues	111134	88182.6	55449.9	105017	79879.5	139213	19636.6	17352.4	24805.8	26936.5	28828	30233	58059.5	58061.4	57274.7
M348T451	(M+H)+	Adenosine monophosphate (AMP)	2.41406	2.00945	0.000132836	348.07	450.827	HMDB0000045	C00020	Nucleosides, nucleotides, and analogues	Purine nucleotides	Purine ribonucleotides	133484	109156	153509	41872.8	107652	141397	249477	237548	230066	180269	244308	238965	167567	184516	167654
M357T516	[M+H]+	.beta.-estradiol 17-valerate	2.22787	0.289695	0.000140013	357.25	516.001		C12859	Lipids and lipid-like molecules	Steroids and steroid derivatives	Steroid esters	172754	165098	108298	84059.3	153800	134551	25666.9	23306.6	19522.7	69043.6	46488.5	53104.4	91050.9	91017.1	87564.1
M255T483	(M-2H+3Na)+	L-NG-Monomethylarginine	1.19525	5.4857	0.000230719	255.085	482.629						5958.33	4987.24	13376.4	4159.34	5551.71	5165.41	28386.6	45124	55627.8	26776.3	23559.6	35556.5	20956.9	20499.3	20505.3
M348T420	[M+H]+	Adenosine 5'-monophosphate	5.92447	2.13856	0.000291425	348.071	420.499	HMDB0000045	C00020	Nucleosides, nucleotides, and analogues	Purine nucleotides	Purine ribonucleotides	767988	510072	826569	143852	637574	822098	1.45535e+06	1.4048e+06	1.38285e+06	963164	1.35375e+06	1.37021e+06	954525	950818	954526
M138T278_2	[M+H]+	Trigonelline	8.39748	0.313316	0.000460057	138.055	278.146	HMDB0000875	C01004	Alkaloids and derivatives			2.11524e+06	2.26557e+06	1.35474e+06	1.81419e+06	1.65982e+06	3.22796e+06	578450	437827	501528	601553	797452	980071	1.36717e+06	1.38888e+06	1.36687e+06
M422T164_2	(M+Na)+	L-Palmitoylcarnitine	1.65803	2.3726	0.000471122	422.326	164.397	HMDB0000222	C02990	Lipids and lipid-like molecules	Fatty Acyls	Fatty acid esters	29145.3	33794.8	67814.2	30444.2	39711.2	35645	117187	114681	88562.4	57372.3	93672.9	89773.1	71029.9	71235.6	71235.8
M132T330	(M+CH3CN+H)+	2-Ethoxyethanol	1.2916	0.373505	0.000559212	132.101	330.063	HMDB0031213	C14687	Organic oxygen compounds	Organooxygen compounds	Ethers	73349.6	35511.3	41109.9	48313.1	53249	68087.2	18643.8	12893.7	20578.3	13451.6	31890.4	21921.9	35426.9	35243.3	35243.1
M836T153	[2M+Na]+	(4r)-4-((3s,5s,7s,9s,10s,13r,14s,17r)-3,7-dihydroxy-10,13-dimethyl-12-oxohexadecahydro-1h-cyclopenta[a]phenanthren-17-yl)pentanoic acid	2.10564	5.17327	0.000745281	835.555	152.715			Lipids and lipid-like molecules	Steroids and steroid derivatives	Bile acids, alcohols and derivatives	4482.82	21480	86682	6665.38	5251.56	5064.06	53402.6	139015	114715	134021	95891.3	133544	59250.8	56272.1	59271.2
M111T67	[M+H-CH5O5P]+	D-erythro-imidazolylglycerol phosphate	3.44111	1.96407	0.000988308	111.054	66.912		C04666	Organic acids and derivatives	Organic phosphoric acids and derivatives	Phosphate esters	166795	220039	231396	197299	321655	372199	403511	635850	614113	445057	435987	430016	395737	395760	387399
M304T437	[M+H]+	Glu-Arg	1.04421	2.35466	0.00165388	304.161	436.869	HMDB0028813		Organic acids and derivatives	Carboxylic acids and derivatives	Amino acids, peptides, and analogues	8713.02	22160.3	31786.4	16682.4	8876.78	7134.41	35788.5	39109.8	26800.5	48682.5	32093.9	42049.6	28093.8	28226.6	28132
M199T123	[M+H]+	Ethyl gallate	1.1393	0.334157	0.00183692	199.045	123.46	HMDB0033836		Benzenoids	Benzene and substituted derivatives	Benzoic acids and derivatives	56919.2	29252.8	19562.4	29478.1	42816.6	50223	9654.96	12452.8	9468.86	10065.7	18680.5	15949.2	26720.3	26720.4	26789.7
M359T339	(M+H)+	Ile-Ala-Arg	1.13342	3.06137	0.00184954	359.24	339.018						2934.69	30725.8	27487.3	8845.89	3720.75	2581.94	36398.6	43385.1	28650.1	52094.8	33450.8	39592	27142.6	26618.6	27143.7
M177T127	[M+H-HO]+	3,4-methylenedioxybenzyl methyl ketoximine	1.35621	0.418243	0.00260613	177.065	127.028						83282.5	44062	34696.5	55912	74053.2	91491.6	21567.5	29406	25813	25653.6	32441.3	25513.6	43284.1	44613.4	44617.8
M809T134	[M+Na]+	1,2-dioleoyl-sn-glycero-3-phosphatidylcholine	1.80914	0.486152	0.00316012	808.582	134.194	HMDB0062690		Lipids and lipid-like molecules	Glycerophospholipids	Glycerophosphocholines	164691	159392	97197.2	72098.4	151964	167756	54069.8	45447.2	95713	62261.9	63259.4	74538.3	102663	102116	102114
M741T121	[M+H]+	1,2-dilinoleoyl-sn-glycero-3-phosphoethanolamine	1.48668	0.420523	0.00355868	740.521	121.252	HMDB0009093		Lipids and lipid-like molecules	Glycerophospholipids	Glycerophosphoethanolamines	98511.4	74128.4	50967.5	51508.1	79244.2	118949	22042.3	25229	56172.8	26800.7	28535.3	40256.9	54072.4	54079.2	53426.9
M132T369	[M+H]+	3-aminohexanoic acid	3.20927	0.163872	0.00362846	132.113	368.592	HMDB0029168		Organic acids and derivatives	Carboxylic acids and derivatives	Amino acids, peptides, and analogues	150316	435959	197957	372876	106303	248622	4100.14	1066.53	1386.13	69293.4	62317.6	109615	123349	130850	121291
M130T176	[M+H]+	Goitrin	1.12771	3.10051	0.00363626	130.049	175.528		C16817	Organoheterocyclic compounds	Azolidines	Oxazolidines	3428.26	11130	40496.7	13322.1	3699.91	1346.75	23812.9	39180.8	44296.2	46147	34743.7	39470.8	26052.4	26528.3	26049.7
M130T252	[M+H-CH3ON]+	DL-arginine	1.05515	1.69777	0.00392741	130.097	251.604	HMDB0000517/HMDB0003416	C00792	Organic acids and derivatives	Carboxylic acids and derivatives	Amino acids, peptides, and analogues	47901.7	24514.5	46106.6	20001.5	31310.2	47990.4	48196.3	70344	64878.6	60270.3	50496.4	75631.1	44506.1	44505.8	43796.2
M342T210	[M+H]+	Ile-Pro-Ile	1.67703	6.95602	0.00412553	342.238	210.065			Organic acids and derivatives	Carboxylic acids and derivatives	Amino acids, peptides, and analogues	3296.72	17818.1	26321.6	11724.3	1769.92	2460.3	38272.4	60721.9	37875.6	143604	64234.4	96239.4	35251.5	31712.6	32320.6
M428T161	[M+H]+	Stearoylcarnitine	1.96294	3.34415	0.00414347	428.373	160.662	HMDB0000848		Lipids and lipid-like molecules	Fatty Acyls	Fatty acid esters	23263.3	41421.9	42452.7	21953.5	39926.6	34940.6	161592	133177	177475	47028.8	92758.5	70036.7	69863.5	69859.3	70844.6
M276T447	[M+H]+	.gamma.-l-glu-.epsilon.-l-lys	1.06773	2.82298	0.00434336	276.155	446.824	HMDB0003869	C21730	Organic acids and derivatives	Carboxylic acids and derivatives	Amino acids, peptides, and analogues	6800.66	18130.3	28959.8	12791.9	5701.14	6302.39	33242.3	32399.7	19440.1	59264.2	36487.1	41296.4	24346.3	24346.3	24251.6
M387T175	[M+H]+	Val-Ile-Arg	1.21261	3.47585	0.00480439	387.263	175.278			Organic acids and derivatives	Carboxylic acids and derivatives	Amino acids, peptides, and analogues	277.817	12226.8	45187.3	14874.1	77.3704	892.503	26401.3	42324.5	48074.8	55770.3	33015.9	50012.9	29888.2	30047	29889.1
M389T244	[M+H]+	Ile-Thr-Arg	1.17854	2.46535	0.00554968	389.239	244.006			Organic acids and derivatives	Carboxylic acids and derivatives	Amino acids, peptides, and analogues	7181.53	25137.2	44137.9	25699.5	10350.6	5798.84	34639	57721.3	41435.7	58039.2	34094.5	65734.8	30999.4	42039.5	42096
M478T189_2	[M+NH4]+	4-[5-[[4-[5-[acetyl(hydroxy)amino]pentylamino]-4-oxobutanoyl]-hydroxyamino]pentylamino]-4-oxobutanoic acid	10.8804	1.92745	0.00584265	478.292	189.105			Lipids and lipid-like molecules	Fatty Acyls	Fatty amides	2.32801e+06	1.67596e+06	4.37134e+06	331289	3.86499e+06	2.57521e+06	4.9439e+06	5.4922e+06	3.61961e+06	4.72695e+06	5.72372e+06	4.68831e+06	4.35858e+06	4.3454e+06	4.34531e+06
M196T57	(M+CH3COO+2H)+	2-Phenylacetamide	2.33248	3.67035	0.00587971	196.096	56.634						8439.93	168826	91862.5	13205.9	7632.68	1599.32	95504.3	223428	179051	116574	206220	249375	136887	154849	155103
M518T160	(M+Na)+	1-Palmitoyl-sn-glycero-3-phosphocholine	20.8087	2.20761	0.0062747	518.324	159.568						1.0246e+07	4.84676e+06	1.35245e+07	747268	7.64272e+06	7.67916e+06	1.74322e+07	1.93499e+07	8.69823e+06	1.43974e+07	2.23019e+07	1.64706e+07	1.48502e+07	1.47786e+07	1.47785e+07
M97T53	(M+H-H2O)+	.beta.-Cyano-L-alanine	2.52261	3.51466	0.00633397	97.0389	53.363						7867.97	130814	157218	17006.5	8988.49	6368.19	141070	223120	311204	125317	198313	154708	115876	116412	114899
M369T165	[M+H]+	Curcumin	1.38633	0.26635	0.00649871	369.117	164.952	HMDB0002269	C10443	Phenylpropanoids and polyketides	Diarylheptanoids	Linear diarylheptanoids	47221.1	58138.8	24484.1	73391.6	111234	48915.7	9073.39	4797.9	5860.16	24183.2	18179.4	34693.5	79186.5	58974.5	79121.9
M116T300_2	[M+H-CH5ON3]+	L-hydroxyarginine	1.5633	0.665875	0.00650316	116.07	299.881	HMDB0004224	C05933	Organic acids and derivatives	Carboxylic acids and derivatives	Amino acids, peptides, and analogues	165388	146124	156602	98372.7	146543	177807	90146.6	90236.5	74694.5	85051.3	133922	119135	124364	124961	126095
M428T132	[M+H]+	Stearoyl-l-carnitine	1.60267	2.57658	0.00680746	428.372	131.654	HMDB0000848		Lipids and lipid-like molecules	Fatty Acyls	Fatty acid esters	16156.3	43262.1	45480.2	26581.8	35787.9	33040.7	88807.4	129631	128357	45740.7	54330.4	69246.3	55315.4	60054.6	60255
M266T434	[M+NH4]+	(3as,5r,5as,8as,9ar)-5,8a-dimethyl-1-methylidene-3a,4,5,5a,6,7,9,9a-octahydroazuleno[6,7-b]furan-2,8-dione	1.72965	0.125597	0.00741814	266.159	434.289			Lipids and lipid-like molecules	Prenol lipids	Terpene lactones	31129.8	99458.9	101486	138984	43364.8	25430.2	4977.97	3911.92	1404.63	11122.8	13467.2	20359.8	32767.2	35584	32786.7
M215T281	[M+H]+	Pro-val	1.73487	4.00216	0.00781372	215.139	281.346			Organic acids and derivatives	Carboxylic acids and derivatives	Amino acids, peptides, and analogues	5279.34	34355.7	63349.5	16795.3	7007.43	5024.47	65903.2	56995.9	47717.6	156480	76417.3	124017	38967.3	38964.3	38227.1
M344T80	[M+H]+	Dibucaine	1.12516	0.733745	0.00842729	344.227	79.57	HMDB0014668	C07879	Organoheterocyclic compounds	Quinolines and derivatives	Quinolones and derivatives	97884.4	164385	125117	113022	137969	119644	89105.7	112407	95453.4	84835.9	90856.1	83535.9	128289	129709	129115
M405T175_2	[M+H-H2O]+	Tetradecanamide, n-[(1r,2r)-2-hydroxy-1-(hydroxymethyl)-2-(4-nitrophenyl)ethyl]-	8.39538	3.45781	0.0089837	405.275	175.227			Benzenoids	Benzene and substituted derivatives	Nitrobenzenes	22238.6	527232	2.28135e+06	865605	11473.7	28828.5	1.18357e+06	2.11455e+06	2.83121e+06	3.03017e+06	1.37959e+06	2.38182e+06	1.33912e+06	1.36347e+06	1.36414e+06
M187T330_2	[M+H]+	Pro-Ala	1.40433	2.04315	0.00921196	187.107	330.063			Organic acids and derivatives	Carboxylic acids and derivatives	Amino acids, peptides, and analogues	21827.5	61711.1	70235.9	42299	24035.7	19834.4	71593.4	59503.8	60614	115098	79376.7	104054	61365.3	61180.4	61289.4
M771T39	[M+H]+	1-hexadecyl-2-(8z,11z,14z-eicosatrienoyl)-sn-glycero-3-phosphocholine	1.31601	0.346965	0.00966663	770.603	39.052			Lipids and lipid-like molecules	Glycerophospholipids	Glycerophosphocholines	64997	41112.4	57186.6	20597.5	68207.6	102187	19214	10021	37970.2	19476.9	8827.98	27415.5	50218.9	44426.1	44326.7
M595T231_1	[M+H]+	Kaempferol 3-o-rutinoside	1.01058	0.186194	0.0110141	595.165	230.903		C21833	Phenylpropanoids and polyketides	Flavonoids	Flavonoid glycosides	18974.8	30616.1	8829.59	56796	26919.4	16744.8	2624.13	2784.36	2002.73	8390.44	7580.26	6200.76	11122.2	11174.8	11174.7
M591T67	[M+Na]+	Leukotriene f4	2.81938	0.141449	0.0122119	591.259	67.0555		C06462	Lipids and lipid-like molecules	Fatty Acyls	Eicosanoids	169365	321908	166126	380820	87048.3	38517.4	12136.5	29694	19806.5	16358.4	35021.9	51599.3	96869.2	101636	99827.6
M785T135	[M+H]+	Arachidonoylthiophosphorylcholine	8.38483	0.491483	0.0125313	784.585	135.453			Organic nitrogen compounds	Organonitrogen compounds	Quaternary ammonium salts	3.7639e+06	2.28146e+06	1.66887e+06	1.81005e+06	3.45862e+06	4.23176e+06	1.22182e+06	985776	2.25933e+06	1.20365e+06	1.26779e+06	1.52234e+06	2.11481e+06	2.12956e+06	2.11468e+06
M288T59	[M+H]+	Heptadecasphinganine	2.65156	1.6083	0.012845	288.289	59.256			Organic nitrogen compounds	Organonitrogen compounds	Amines	188870	284086	342072	296028	302899	89406.1	264069	420943	377995	442314	504984	407551	500956	507444	500951
M229T266	[M+H]+	Leu-Pro	1.46205	3.08629	0.0134344	229.154	266.222			Organic acids and derivatives	Carboxylic acids and derivatives	Amino acids, peptides, and analogues	2229.66	35724.1	53418.2	32614.1	3462.46	6933.39	47271.9	55222.6	32968.1	118432	66569.5	94277.6	49350.2	49348.9	49190
M241T361	[M+H]+	Pheniramine	1.45212	0.582902	0.0136728	241.155	361.497	HMDB0015557		Organoheterocyclic compounds	Pyridines and derivatives	Pheniramines	129925	91414.6	107603	99421.3	127039	147742	68320.5	68157	132708	34181.2	55507.2	50989.9	86465.7	85588.2	85585.4
M72T369	[M+H]+	Pyrrolidine	1.59203	0.397667	0.014317	72.0801	368.507	HMDB0031641		Organoheterocyclic compounds	Pyrrolidines		82539.1	118797	83618.9	142490	80987.5	26380.3	34093.5	11898.1	9887.33	51163	50314.8	55320.9	54648.5	54174.8	47392.7
M370T35	[M+H]+	N-arachidonylmaleimide	3.59374	2.22838	0.0151266	370.295	35.162			Organoheterocyclic compounds	Pyrrolidines	Pyrrolidones	355658	81377.5	202528	31292.9	319080	373351	587982	831404	446019	390532	462737	319250	206766	211991	211980
M493T238	[M+H-H2O]+	Leukotriene d4 methyl ester	1.59766	0.252073	0.0187826	493.28	238.219			Organic acids and derivatives	Carboxylic acids and derivatives	Amino acids, peptides, and analogues	171168	75978.9	49130.6	62583.6	23090.9	97164.5	13882.2	12600.8	12385.5	38903.6	18641	24359.5	49583.9	50315.2	49584.8
M135T336_2	[M+H-C13H17N]+	Methanone, (3-methoxyphenyl)(1-pentyl-1h-indol-3-yl)-	1.74426	0.35843	0.0221438	135.047	335.838			Organoheterocyclic compounds	Indoles and derivatives	Benzoylindoles	163218	41523.6	71269.7	37920.6	115492	143168	33809.8	13497.8	32270	24873.3	39020.6	61762.5	55127.7	55664.5	55127.4
M593T36	[M+H]+	Pheophorbide a	9.93524	0.0768102	0.0239831	593.276	35.815		C18021	Organoheterocyclic compounds	Tetrapyrroles and derivatives	Chlorins	1.14898e+06	3.06592e+06	4.19054e+06	5.13735e+06	653981	180126	87129.5	125694	107213	126912	202716	454628	892294	880388	880339
M496T184	[M+H]+	Lpc 16:0	8.04166	1.86242	0.0259135	496.339	183.505			Lipids and lipid-like molecules	Glycerophospholipids	Glycerophosphocholines	2.36763e+06	960793	2.12888e+06	536490	2.63112e+06	1.36806e+06	2.94993e+06	2.91511e+06	1.52872e+06	2.63983e+06	4.32383e+06	4.25366e+06	2.56174e+06	2.56175e+06	2.57744e+06
M137T162	[M+H]+	Hypoxanthine	1.72593	0.395083	0.0265619	137.045	162.478	HMDB0000157	C00262	Organoheterocyclic compounds	Imidazopyrimidines	Purines and purine derivatives	174732	36421.4	109364	42128	96478.2	168775	46440.8	42508.6	32159.5	39254.9	43347.2	44360.4	72115.6	61399.1	72383.8
M468T188	[M+H]+	1-myristoyl-sn-glycero-3-phosphocholine	1.63455	1.78943	0.0267587	468.307	188.381	HMDB0010379		Lipids and lipid-like molecules	Glycerophospholipids	Glycerophosphocholines	112891	42316	87219.8	21817.5	131319	71735.3	124783	164502	82810	107035	184889	172176	117188	116849	117187
M147T512	[M+H]+	DL-Lysine	1.70075	0.736151	0.0274854	147.113	512.329	HMDB0142894	C16440	Organic acids and derivatives	Carboxylic acids and derivatives	Amino acids, peptides, and analogues	213520	267391	221573	216878	256144	236699	157197	115107	109217	212218	203695	242162	215669	222697	215521
M546T158	(M+Na)+	1-Stearoyl-sn-glycerol 3-phosphocholine	1.64433	1.67902	0.0295891	546.354	157.899						128273	59734.8	131887	15377.6	93327.3	85095.5	141540	168258	99870.3	123280	198784	130771	121599	124208	124198
M100T55	[M+H]+	2-piperidone	1.27894	1.58917	0.0302492	100.075	54.684	HMDB0011749	C10482	Organoheterocyclic compounds	Piperidines	Piperidinones	84499.3	26928.9	81585.1	33064.4	71777.8	90510.9	68235.5	95491.4	83644.5	117400	118743	133665	83894	83937.8	82221.7
M360T408	[M+NH4]+	Maltose	1.69693	0.18244	0.0319408	360.15	408.261	HMDB0000163	C00208	Lipids and lipid-like molecules	Fatty Acyls	Fatty acyl glycosides	37454.2	179364	95300.4	109086	24298.4	20009.6	12700.1	13047.5	11413.1	16526.7	14360.4	16880.3	44960.5	45420.8	45423.7
M736T141_2	[M+H]+	1,2-dilinolenoyl-sn-glycero-3-phosphoethanolamine	3.59281	0.730573	0.0369599	736.492	141.133	HMDB0009161		Lipids and lipid-like molecules	Glycerophospholipids	Glycerophosphoethanolamines	1.23232e+06	1.33603e+06	1.08991e+06	766764	1.1936e+06	1.56063e+06	737147	768688	1.25657e+06	804492	784544	893531	1.12512e+06	1.13849e+06	1.12537e+06
M533T45	[M+H-H2O]+	Manumycin a	1.1228	0.472383	0.0393774	533.253	45.285		C12111	Organic oxygen compounds	Organooxygen compounds	Carbonyl compounds	69433.7	89250.8	78049.6	21472.6	48159.6	64117.7	13206.9	3741.73	18433.2	70445.2	35879.7	33303.8	27730.9	26795.4	27728.4
M104T360	[M+H]+	4-Aminobutyric acid(GABA)	1.45041	0.175717	0.0394579	104.07	360.187	HMDB0000112	C00334	Organic acids and derivatives	Carboxylic acids and derivatives	Amino acids, peptides, and analogues	26628.6	93283.9	45542.9	122914	23418.6	8389.38	4487.94	3837.6	4500.62	7444.2	17593.7	18396.7	39071.4	38523.3	39077.1
M328T232	[M+H]+	Diprotin b	1.62544	3.53319	0.0396606	328.223	232.195			Organic acids and derivatives	Carboxylic acids and derivatives	Amino acids, peptides, and analogues	2828.2	45872.1	73506.7	23199	3019.29	1598.28	36698.6	73070.8	33869.3	188333	75358.7	122732	64699.5	64705	65635.3
M518T179_2	[M+H]+	Lpc 18:3	28.7622	1.61896	0.0408514	518.324	179.09			Lipids and lipid-like molecules	Glycerophospholipids	Glycerophosphocholines	3.49831e+07	1.95283e+07	5.11262e+07	3.60374e+06	2.31181e+07	3.17224e+07	4.86092e+07	4.69182e+07	3.20874e+07	3.96884e+07	5.3139e+07	4.51992e+07	5.18728e+07	5.21405e+07	5.18731e+07
M274T347	(M+H)+	Val-Arg	1.09095	2.21725	0.0439257	274.187	346.604						4190.29	20225.4	59183.5	29431.6	6168.4	4342.92	37319.5	52853.2	27412.5	71393.3	35278.9	49666.8	33519.9	33540.1	34415.8
M360T389	[M+NH4]+	Isomaltose	2.14803	0.582327	0.0501945	360.151	388.659	HMDB0002923	C00252	Lipids and lipid-like molecules	Fatty Acyls	Fatty acyl glycosides	254960	363501	348498	388386	268426	135671	211039	231061	312500	90224.4	58546.1	121202	219886	219870	217892
M189T382	(M+H)+	Val-Ala	1.67354	0.40372	0.0507846	189.123	381.717						187601	38133.8	55979.2	41270.5	100159	153778	39215.7	40157.9	52271.2	27988.1	40354.2	32927.2	47157	42826.6	47108.6
M704T170	[M+H]+	Palmitoyl sphingomyelin	1.818	1.33966	0.0510771	703.574	170.063	HMDB0061712		Lipids and lipid-like molecules	Sphingolipids	Phosphosphingolipids	272723	294318	323456	223347	289992	282276	325032	221796	433070	441364	498342	339208	352149	362611	352154
M527T50	[M+H]+	Flavone base + 3o, 2meo, o-guaiacylglycerol	2.42021	2.78457	0.051393	527.153	49.676			Phenylpropanoids and polyketides	Flavonoids	O-methylated flavonoids	88859.1	79821	142593	52910.5	52311.6	48042.3	284772	436752	190897	271813	29127.6	80173.6	134479	139377	134461
M164T453_2	[M+H]+	Dl-ethionine	1.56584	0.348177	0.0520985	164.073	453.482			Organic acids and derivatives	Carboxylic acids and derivatives	Amino acids, peptides, and analogues	47380.1	101294	87624.9	195319	69357.1	31002.2	16770	10937.2	19662	52291.9	76153.2	9407.86	70259.5	70066.8	70650
M389T140	[M+H]+	Icariside b5	1.28246	0.239067	0.0593555	389.216	139.828			Lipids and lipid-like molecules	Fatty Acyls	Fatty acyl glycosides	24874	56097.7	22971.9	120719	45095.1	11486.9	2058.33	2113.6	654.804	22725.4	23749.3	15934.8	30862.8	35169.9	30826.3
M353T35	[M+H]+	Monolinolenin (9c,12c,15c)	4.36468	1.56563	0.0601116	353.268	35.1665			Lipids and lipid-like molecules	Fatty Acyls	Lineolic acids and derivatives	965561	476503	884862	182188	942738	952521	1.32216e+06	1.75874e+06	922542	951313	1.13965e+06	801202	565574	561021	561023
M743T140	[M+Na]+	1,2-dipalmitoyl-sn-glycero-3-phosphoethanolamine-n,n-dimethyl	1.92758	0.760059	0.0601512	742.537	139.837	HMDB0010566		Lipids and lipid-like molecules	Glycerophospholipids	Glycerophosphoethanolamines	426011	313606	305360	205147	394059	412944	241398	235867	346575	229974	245464	264259	299554	301322	304449
M757T138_1	(M+Na)+	PC(16:0/16:0)	7.67067	0.79889	0.0608851	756.555	137.964	HMDB0000564/HMDB0007878/HMDB0007879/HMDB0007880/HMDB0007882/HMDB0007884/HMDB0007886/HMDB0007887/HMDB0007897/HMDB0007898/HMDB0007911/HMDB0007912/HMDB0007913/HMDB0007914/HMDB0007936/HMDB0007937/HMDB0007938/HMDB0007939/HMDB0007940/HMDB0007958/HMDB0007959/HMDB0007960/HMDB0007961/HMDB0007964/HMDB0007966/HMDB0007967/HMDB0007981/HMDB0007982/HMDB0007983/HMDB0007984/HMDB0007985/HMDB0008002/HMDB0008003/HMD…	C00157	Lipids and lipid-like molecules	Glycerophospholipids	Glycerophosphocholines	7.77456e+06	7.25421e+06	6.4632e+06	4.27935e+06	7.36037e+06	7.99758e+06	5.18269e+06	4.94573e+06	6.9277e+06	4.58117e+06	5.36226e+06	5.85821e+06	6.36819e+06	6.27325e+06	6.27331e+06
M535T88	[M+H-CH6O2]+	Lappaconitine	13.5587	0.0312555	0.0609755	535.27	88.206		C08694	Lipids and lipid-like molecules	Prenol lipids	Diterpenoids	7.71183e+06	80504.9	62668.3	36028.8	5.45998e+06	9.22436e+06	139073	212553	188828	44703.6	58869.6	61577.2	2.53705e+06	2.47893e+06	2.47756e+06
M177T351_2	[M+H]+	Allantoic acid	1.97216	1.63226	0.0621823	177.062	351.139	HMDB0001209	C00499	Organic acids and derivatives	Carboxylic acids and derivatives	Amino acids, peptides, and analogues	258680	212652	155031	118535	235074	197511	509242	115638	392079	232050	322869	350082	260524	260516	259426
M229T234_2	[M+H]+	Ile-Pro	1.6754	2.59983	0.0633831	229.154	234.162			Organic acids and derivatives	Carboxylic acids and derivatives	Amino acids, peptides, and analogues	12746.4	68064.4	96726.4	51785.9	13240.7	10223.5	70557.2	79198.7	31322.1	232691	101843	141591	86134.3	86059.9	88069.2
M362T198	(2M+NH4)+	Pro-Gly	1.10944	3.22152	0.0640076	362.207	197.684						1767.16	26935.2	42124.5	5380.57	3007.09	1508.61	14694.6	31177.1	16018.7	95859.8	43053.8	59247.1	27517.7	29205.4	29190.5
M309T47	[M+H]+	8z,14z-eicosadienoic acid	2.05574	3.40825	0.0655005	309.278	46.775			Lipids and lipid-like molecules	Fatty Acyls	Fatty acids and conjugates	19087.2	28815.4	157981	19198.6	22508.1	15472.6	67371	56430.6	81485	252010	114551	324737	76313.5	76322.2	85635.4
M177T201	[M+H-C7H5NO2]+	Icilin	2.56126	0.481797	0.0698282	177.065	200.872		C20171	Benzenoids	Benzene and substituted derivatives	Nitrobenzenes	293555	101830	132944	222118	408206	546274	223186	141453	134524	72056.3	154982	95228.6	174253	174297	176340
M247T105	(M+H-H2O)+	Abscisic Acid (cis,trans)	1.0181	0.184173	0.072454	247.132	104.812						12317.4	92669.4	27349.2	31734.1	15322.5	9968.98	1405.63	3574.67	1824.66	8876.89	8273.35	10920.1	22001.6	22595.9	22595.8
M130T514	[M+H-NH3]+	Lysine	1.52923	0.79634	0.0759281	130.086	513.541	HMDB0000182	C00047	Organic acids and derivatives	Carboxylic acids and derivatives	Amino acids, peptides, and analogues	343618	280455	350105	346268	314939	353424	285705	171448	243314	203123	395165	285012	296464	296010	263915
M522T176_2	[M+H]+	Lpc 18:1	8.07218	1.64946	0.0844592	522.354	176.48			Lipids and lipid-like molecules	Glycerophospholipids	Glycerophosphocholines	2.19775e+06	1.17386e+06	4.84714e+06	294647	1.82975e+06	1.8607e+06	3.81701e+06	3.02611e+06	2.37043e+06	3.01751e+06	4.38594e+06	3.51275e+06	4.31727e+06	4.3205e+06	4.3205e+06
M189T514	[M+H]+	N6,N6,N6-Trimethyl-L-lysine	1.70218	0.727731	0.0854744	189.159	513.78	HMDB0001325	C03793	Organic acids and derivatives	Carboxylic acids and derivatives	Amino acids, peptides, and analogues	308770	200999	195581	133563	267898	199359	144678	107795	115519	162391	208427	211730	188498	188055	170476
M331T47	[M+H-H2O]+	1,3,4,6-tetra-o-acetyl-.beta.-d-mannopyranose	1.24052	1.76992	0.0886606	331.117	46.605			Organic acids and derivatives	Carboxylic acids and derivatives	Tetracarboxylic acids and derivatives	23431.5	48551	69080.8	82908.1	26913.1	9697.02	70355.9	128428	73577.9	100215	43363.2	45268.7	65903.5	65893.7	64620.8
M84T389_2	(M+H-H2O)+	1-Aminocyclopropanecarboxylic acid	1.32607	1.29358	0.0900734	84.0446	388.551	HMDB0036458	C01234	Organic acids and derivatives	Carboxylic acids and derivatives	"Amino acids, peptides, and analogues"	190645	138895	151141	73322.9	135921	168768	183551	178528	127459	174380	242131	204735	162905	162930	158637
M120T97	[M+H-H2O]+	Anthranilic acid	1.25896	1.80048	0.0907537	120.043	97.116	HMDB0001123	C00108	Benzenoids	Benzene and substituted derivatives	Benzoic acids and derivatives	42488.9	40068.6	69555.9	31172.8	63253.2	75174.4	50853.3	43256	64977.1	141318	103724	175112	80311.8	80985.1	78860.1
M315T50	[M+H-H2O]+	Marrubiin	2.79614	0.0723059	0.0917064	315.193	50.485		C09128	Organoheterocyclic compounds	Lactones	Gamma butyrolactones	4851.05	382974	164319	481268	6113.61	3576.1	16338.7	7350.02	5680.24	24437.7	8498.51	13117.1	213838	205892	209496
M127T100	[M+H]+	Thymine	1.72535	0.0626918	0.0978175	127.049	99.582	HMDB0000262	C00178	Organoheterocyclic compounds	Diazines	Pyrimidines and pyrimidine derivatives	7181.71	140868	39477.3	191864	6218.62	3039.56	5945.14	5293.41	6356.37	4611.75	1013.27	1145.22	45434.7	44980.1	45433.5
M133T50	[M+H-H2O]+	Perillaldehyde	1.45986	0.201942	0.098142	133.1	50.3475	HMDB0003647	C02576	Lipids and lipid-like molecules	Prenol lipids	Monoterpenoids	11888	114375	35469	142493	12848.3	11460.4	11535.1	12682.9	9990.12	2138.33	17479.2	12519.4	38651.9	38485.1	38652.1
M558T367	[M+H-H2O]+	.alpha.-ergocryptine	0.463985	4.73576	0.00315512	558.325	367.111		C07545	Alkaloids and derivatives	Ergoline and derivatives	Lysergic acids and derivatives	698.111	1941.96	2435.9	1311.66	525.358	649.158	7720.69	10348.1	2951.05	6549.24	5350.62	2892.85	3466.15	3465.59	3613.07
M227T278	(M+H-2H2O)+	.alpha.-L-Glu-L-Asp	0.1086	0.642559	0.199681	227.07	278.191						1408.23	2477.24	1750.59	514.696	492.561	1431.05	1294.49	344.603	1031.84	1301.64	586.45	629.241	1770.05	1699.09	1768.99
M504T465	[M+H]+	.beta.-d-glucopyranosiduronic acid, 5-[3-[(2,2,3,3-tetramethylcyclopropyl)carbonyl]-1h-indol-1-yl]pentyl	0.35073	1.98787	0.00619984	504.241	464.909			Lipids and lipid-like molecules	Fatty Acyls	Fatty acyl glycosides	1756.4	4132.65	3889.28	2919.04	1890.96	1608.25	5153.81	6876.22	2636.43	6700.77	5210.94	5618.57	3621.87	3756.42	3600.51
M445T268	[M+H-2H2O]+	.beta.-ecdysone	0.181843	0.718912	0.3387	445.303	268.399	HMDB0030180	C02633	Lipids and lipid-like molecules	Steroids and steroid derivatives	Bile acids, alcohols and derivatives	1282.45	4393.25	2817.73	3330.38	1483.3	407.048	1294.3	1384.24	1482.18	1951.97	1219.72	2526.85	1999.21	2048.56	2048.22
M130T318	(M+H)+	.beta.-Homoproline	0.198645	1.09971	0.665121	130.085	318.118						4991.08	6829.1	4969.02	7972.39	4155.27	431.236	4704.26	5422.44	4831.65	5542.49	5221.84	6551.81	4283.68	3065.93	4287.93
M373T35	[M+H-2H2O]+	.beta.-muricholic acid	0.325278	1.06667	0.580984	373.294	34.5135	HMDB0000415	C17726	Lipids and lipid-like molecules	Steroids and steroid derivatives	Bile acids, alcohols and derivatives	27698.5	15649.7	22244.1	12695.8	23051.1	20948.3	19504.4	22766.2	18882.1	21662.5	22943.9	24681.4	20689.4	21256.8	20729.4
M744T485	[M+H]+	.beta.-nicotinamide adenine dinucleotide phosphate	0.256448	1.49168	0.0119224	744.082	484.897	HMDB0000221	C00006				3585.27	1986.16	3189.96	2385.5	3264.57	3715.79	5408.87	5711.57	3360.42	3653.56	4880.09	4025.5	3919.32	3919.26	3934.26
M104T325	[M+H]+	.gamma.-aminobutyric acid	0.632331	0.131821	0.143632	104.07	325	HMDB0000112	C00334	Organic acids and derivatives	Carboxylic acids and derivatives	Amino acids, peptides, and analogues	1397.41	19341.8	2018.95	28798.1	1010.39	1426.67	997.117	786.725	916.492	1421.32	1366.51	1629.26	3610.63	3529.52	5341.92
M251T382	[M+H]+	.gamma.-glu-cys	0.431421	0.432474	0.000183064	251.076	381.761	HMDB0001049	C00669	Organic acids and derivatives	Carboxylic acids and derivatives	Amino acids, peptides, and analogues	7276.33	6853.95	4124.23	6592.34	8079.23	6013.06	2657.51	2299.19	1608.98	3394.94	3052.31	3827.23	4829.04	4639.22	4829.36
M135T127	[M+H-H2O]+	(-)-myrtenol	0.793178	0.453286	0.102363	135.116	126.758	HMDB0035100		Lipids and lipid-like molecules	Prenol lipids	Monoterpenoids	24352.4	27432.3	12335.2	57795.1	11913.4	29950.3	4318.81	4577.01	3751.73	33634.6	15167.1	12789.4	22058.6	22075.7	21080.2
M377T248	(M+H)+	(-)-Riboflavin	0.579523	0.266906	0.0564506	377.145	247.818						8410.09	7458.91	5248.14	7138.88	10376.4	30946.2	2414.72	2797.44	2196.59	3613.65	3348.66	4199.91	4883.59	4881.29	4213.01
M327T209	[M+H-2H2O]+	(-)-secoisolariciresinol	0.410727	1.27269	0.214007	327.141	208.827	HMDB0013692	C18167	Lignans, neolignans and related compounds	Dibenzylbutane lignans	Dibenzylbutanediol lignans	13138.5	14235.3	21995.1	9396.61	12288.7	15447	27260.4	23460	13879.3	11956.5	17770.5	15762.2	15478.1	16540.2	15483.3
M358T363	(M+H-2H2O)+	(-)-Tylocrebrine	0.32787	0.779031	0.590163	358.173	362.702						2830.08	17582.1	17424.9	9320.81	2798.29	2669.49	10150.7	3584.18	14204.7	5860.94	5208.39	1988.11	13883.4	13883.9	13632.2
M573T22	[2M+H]+	(.+/-.)-cromakalim	0.0944985	1.62076	0.0823402	573.282	22.11		C11819	Organoheterocyclic compounds	Benzopyrans	1-benzopyrans	364.985	519.342	511.239	401.622	414.757	291.129	1287.01	527.311	746.561	474.913	455.795	565.298	522.402	496.053	522.382
M504T234	[M+H+H2O]+	(+)-3',5'-o-(1,1,3,3-tetraisopropyl-1,3-disiloxanediyl)cytidine	0.455771	1.38861	0.222435	504.273	233.5			Organic oxygen compounds	Organooxygen compounds	Carbohydrates and carbohydrate conjugates	5438.23	20610.4	13799.2	18853.7	4170.83	4679.32	15391.3	19113.1	9238.87	15104.7	17756	17199.2	11364.7	11361.7	11731.7
M611T338	[2M+Na]+	(1e,4e)-1,5-bis(4-methoxyphenyl)penta-1,4-dien-3-one	0.0704611	0.905431	0.733812	611.232	337.723			Benzenoids	Phenol ethers	Anisoles	679.466	637.335	1037.72	1671.8	788.441	532.523	396.933	415.047	1325.02	677.425	721.233	1305.94	660.597	599.425	662.055
M483T320	[M+Na]+	(2r,3s,4s,5r,6r)-2-[[(2s,3r,4r)-3,4-dihydroxy-4-(hydroxymethyl)oxolan-2-yl]oxymethyl]-6-[4-(4-hydroxyphenyl)butan-2-yloxy]oxane-3,4,5-triol	0.0780807	1.29766	0.446176	483.162	320.272			Lipids and lipid-like molecules	Fatty Acyls	Fatty acyl glycosides	483.596	256.095	1325.94	482.671	457.5	549.844	816.124	1042.9	698.757	458.15	247.397	1350.68	465.024	632.471	468.613
M439T419	[M+Na]+	(2r,3s,4s,5r,6r)-5-[(2s,3r,4r)-3,4-dihydroxy-4-(hydroxymethyl)oxolan-2-yl]oxy-2-(hydroxymethyl)-6-(2-phenylethoxy)oxane-3,4-diol	1.56335	0.390253	0.236252	439.141	418.609			Organic oxygen compounds	Organooxygen compounds	Carbohydrates and carbohydrate conjugates	3330.52	168698	75099.7	187584	6034.89	3769.37	13920.3	12091.9	12520.6	62130.3	27791.1	45019.8	83450	81754.6	83445.4
M601T479	[M+Na]+	(3s,4s)-5-[(3s,4s)-4,10-dihydroxy-7,9-dimethoxy-3-methyl-3,4-dihydro-1h-benzo[g]isochromen-5-yl]-7,9-dimethoxy-3-methyl-3,4-dihydro-1h-benzo[g]isochromene-4,10-diol	0.246043	0.327104	0.0423855	601.194	479.256						730.322	4018.65	2581.41	3103.48	1361.28	405.385	750.241	677.688	729.549	279.219	863.309	690.842	1392.67	1462.21	1390.94
M370T31	(M+CH3CN+H)+	(4Z,7Z,10Z,13Z,16Z,19Z)-4,7,10,13,1 6,19-Docosahexaenoic acid	0.762364	0.497724	0.455809	370.266	31.1345						157928	6915.38	25654.7	10392.2	13293.6	10760.7	17477.4	24207.6	15741	14933	20822.4	18779.2	43238.8	26351.5	28669.5
M1028T337	[M+H]+	(9z,12z,15z-octadecatrienoyl) coenzyme a	0.158115	0.434419	0.0577002	1028.34	337.091	HMDB0006290	C16162	Lipids and lipid-like molecules	Fatty Acyls	Fatty acyl thioesters	630.75	911.473	649.371	2346.63	1088.07	670.323	496.621	455.152	227.555	662.155	343.067	550.82	722.199	647.353	652.349
M328T36	[M+NH4]+	(e)-4-[(1r,2s,3s,4r,8as)-2,3,4-trihydroxy-2,5,5,8a-tetramethyl-3,4,4a,6,7,8-hexahydro-1h-naphthalen-1-yl]but-3-en-2-one	0.672896	0.597094	0.168753	328.248	35.791			Lipids and lipid-like molecules	Prenol lipids	Sesquiterpenoids	15941.4	33757.7	23549.5	48083.8	9896.54	12151.3	13695.1	13233.2	7308.67	25620.7	12038.5	13715.3	20831.3	21129	22976.2
M256T218	[M+H]+	(methylenecyclopropyl)acetyl-l-carnitine	0.304592	0.387621	0.0561198	256.139	217.869						2249.91	4244.83	1893.22	7307.56	2386.49	1625.11	1085.61	945.397	828.239	1195.68	2645.76	938.196	2818.96	2523.84	2484.43
M325T251	[M+H-CO2]+	(phenoxymethyl)penicilloic acid	0.274275	0.364886	0.238844	325.112	250.973			Organic acids and derivatives	Carboxylic acids and derivatives	Amino acids, peptides, and analogues	767.954	8252.94	744.696	4617.68	380.507	802.098	550.222	554.054	564.776	1337.52	1266.56	1406.63	2087.57	2097.1	2568.01
M232T247	[M+H]+	(r)-butyrylcarnitine	0.778746	1.51154	0.0608671	232.154	247.094	HMDB0002013		Lipids and lipid-like molecules	Fatty Acyls	Fatty acid esters	29447.9	23743	17770.7	23998.9	25191.3	46087.2	60449.3	45025.8	44721.8	20915.6	45879.3	34284.7	33847	33465.8	33467.1
M265T273	[M+H-H2O]+	(s)-dibutyl 3-hydroxybutyl phosphate	0.174233	0.574276	0.0877983	265.165	272.914			Organic acids and derivatives	Organic phosphoric acids and derivatives	Phosphate esters	3288.27	941.906	1822.63	1546.57	1034.84	2823.85	914.087	866.781	1061.18	1470.84	1738.83	528.377	1761.63	1826.97	1825.09
M715T197	[M+Na]+	[(1r,2r,3ar,5r,6e,10r,11s,13r,13as)-1,2,3a,11,13-pentaacetyloxy-2,5,8,8-tetramethyl-12-methylidene-4,9-dioxo-3,5,10,11,13,13a-hexahydro-1h-cyclopenta[12]annulen-10-yl] 2-methylbutanoate	0.14852	0.778862	0.39879	715.309	196.675			Lipids and lipid-like molecules	Prenol lipids	Diterpenoids	1931.43	2124.07	3698.46	1313.1	2007.63	1349.04	826.505	711.928	808.848	2631.86	2095.15	2602.1	2241.99	2297.44	2296.96
M699T412	[M+Na]+	[(2r,3r,4s,5s,6r)-3-acetyloxy-2-(acetyloxymethyl)-5-hexanoyloxy-6-[(2s,3r)-2,3,4-trihydroxybutoxy]oxan-4-yl] tetradecanoate	0.173192	1.47264	0.113224	699.403	411.585						812.851	2384.26	2469.05	1325.56	638.389	571.988	2005.17	1804.49	1974.5	2593.44	1841.53	1859.62	1520.11	1734.49	1723.66
M935T435	[M+Na]+	[(2s,3r,4s,5r,6r)-6-[[(2r,3s,4s,5r,6r)-3,4-dihydroxy-6-[(2e,6e,10e)-3,7,11,15-tetramethylhexadeca-2,6,10,14-tetraenoxy]-5-[(2s,3r,4r,5s,6s)-3,4,5-triacetyloxy-6-methyloxan-2-yl]oxyoxan-2-yl]methoxy]-4,5-dihydroxy-2-methyloxan-3-yl] acetate	0.171209	0.675594	0.131898	935.468	435.278			Lipids and lipid-like molecules	Prenol lipids	Terpene glycosides	2053.97	3856.43	3689.94	2709.8	1284.04	2283.73	2673.29	1101.59	1331.78	1924.02	891.835	2804.51	2270.43	2270.4	2341.19
M548T481	[M+H]+	[1,1'-biphenyl]-2-carboxylic acid, 4'-[[2,3-dimethyl-5-[[[(1s)-1-(4-nitrophenyl)ethyl]amino]carbonyl]-1h-indol-1-yl]methyl]-	0.101827	1.33432	0.0703153	548.232	481.431			Organoheterocyclic compounds	Indoles and derivatives	Indolecarboxylic acids and derivatives	652.038	1055.4	1021.06	787.64	486.513	457.917	776.13	928.966	1026.8	905.603	1210.12	1104.19	1707.02	1358.89	1366.38
M733T338	[M+Na]+	[17-(2,6-dihydroxy-6-methyl-3-oxoheptan-2-yl)-3-hydroxy-4,4,9,13,14-pentamethyl-2-[3,4,5-trihydroxy-6-(hydroxymethyl)oxan-2-yl]oxy-2,3,7,8,10,11,12,15,16,17-decahydro-1h-cyclopenta[a]phenanthren-16-yl] acetate	0.208227	2.00538	0.0263102	733.422	337.716			Lipids and lipid-like molecules	Steroids and steroid derivatives	Steroidal glycosides	215.126	2025.33	1722.46	892.315	434.627	134.92	1483.02	1906.72	1418.68	2148.43	1882.03	2039.86	1183.59	1222.77	1184.44
M855T419	[2M+Na]+	[3-hydroxy-1-(4-methoxy-7-oxofuro[3,2-g]chromen-9-yl)oxy-3-methylbutan-2-yl] (e)-2-methylbut-2-enoate	0.535701	0.170616	0.158018	855.295	419.014			Phenylpropanoids and polyketides	Coumarins and derivatives	Furanocoumarins	125.295	16431.5	3930.98	19560.9	291.951	53.1529	409.169	351.961	292.41	2902.63	1100.85	1834.82	4478.55	4429.35	4478.24
M277T50	[M+H]+	[6]-shogaol	3.78437	0.607146	0.535755	277.179	50.4005	HMDB0137236	C10494	Benzenoids	Phenols	Methoxyphenols	59248	1.4726e+06	71908	1.18009e+06	71440.6	29283	40625.7	48134	25268.2	675316	459057	502951	163058	464139	464689
M502T342	[M+Na]+	1-(1z-hexadecenyl)-sn-glycero-3-phosphocholine	0.227476	1.07779	0.887176	502.318	342.188	HMDB0010407		Lipids and lipid-like molecules	Glycerophospholipids	Glycerophosphocholines	209.561	5444.22	6882.52	2267.04	360.433	234.665	4809.73	3005.57	4635.27	1483.74	1109.68	1552.28	3574.04	3187.02	3614.03
M143T355	[M+H]+	1-acetyl-3-piperidinamine	0.565326	0.385577	0.049355	143.117	355.411			Organoheterocyclic compounds	Piperidines	N-acylpiperidines	23637.4	9750.6	8711.96	8984.34	3998.4	18786	3527.24	3035.08	2363.49	4769.57	2422.74	12364	13511.7	13509	13144.6
M769T133	[M+H]+	1-hexadecyl-2-(5z,8z,11z,14z-eicosatetraenoyl)-sn-glycero-3-phosphocholine	0.271809	0.893605	0.530299	768.588	133.128			Lipids and lipid-like molecules	Glycerophospholipids	Glycerophosphocholines	11237.1	8882.29	5767.14	5777.46	7787.28	14850.4	7299.88	8506.1	9405.95	8035.4	6818.39	8458.48	5876.08	4666.52	4814.28
M395T32	[M+H-H2O]+	1-hydroxy vitamin d2	2.07488	1.24259	0.513187	395.315	31.817		C08211	Lipids and lipid-like molecules	Steroids and steroid derivatives	Vitamin D and derivatives	434310	80559.2	268116	15806.6	441310	335632	264884	293674	162209	258627	574786	403803	284779	280617	280388
M440T193	[M+H]+	1-lauroyl-2-hydroxy-sn-glycero-3-phosphocholine	0.654162	1.90289	0.000464585	440.277	192.83			Lipids and lipid-like molecules	Glycerophospholipids	Glycerophosphocholines	11422.6	7783.35	14357.4	4156.38	9415.85	8032.65	19619.4	19195.6	14115	16978.7	17651.1	17419.4	14668.2	14667.2	14769.1
M282T284	[M+H]+	1-methyladenosine	0.414313	0.765586	0.22427	282.119	284.094	HMDB0003331	C02494	Nucleosides, nucleotides, and analogues	Purine nucleosides		23730.8	9248.51	12322.9	14008	28417.1	17787.2	15716.4	16088.1	16029.7	10045.5	11850.1	11050.7	14333.4	15438.4	15429.9
M170T368	(M+H)+	1-Methylhistidine	0.417308	1.33005	0.316701	170.092	368.377	HMDB0000001/HMDB0000479	C01152	Organic acids and derivatives	Carboxylic acids and derivatives	"Amino acids, peptides, and analogues"	5335.5	5271.99	16611	7724.04	26564.1	23127.8	26222.8	19858	15335.7	14797.7	23736.1	12618	8348.15	7511.84	8363.16
M337T79	[M+H-H2O]+	1-monolinoleoyl-rac-glycerol	1.53578	0.190232	0.120199	337.273	78.7815			Lipids and lipid-like molecules	Fatty Acyls	Lineolic acids and derivatives	12007	175934	44036	128733	7318.57	5701.72	13108.7	10857.6	7182.02	13525.4	12859.5	13562.1	56275.4	61531.5	58944.1
M426T195	[M+H]+	1-myristoyl-2-hydroxy-sn-glycero-3-phosphoethanolamine	0.471108	1.88791	0.0705993	426.261	194.717	HMDB0011500		Lipids and lipid-like molecules	Glycerophospholipids	Glycerophosphoethanolamines	8790.54	3583.78	5238.33	2258.45	9836.71	6942.65	7471.04	10437.5	4852.69	9487.93	20598.4	16345.2	9512.14	9390.84	9447.05
M387T38	[M+H]+	1-o-b-d-glucopyranosyl sinapate	1.94612	1.81686	0.512504	387.154	37.762			Phenylpropanoids and polyketides	Cinnamic acids and derivatives	Hydroxycinnamic acids and derivatives	7118.08	146863	128342	440266	6661.62	7985.68	69032.6	108019	127329	876151	74589	84332.1	1.23525e+06	1.23497e+06	1.17843e+06
M578T366_2	[M+K]+	1-o-hexadecyl-2-deoxy-2-thio-s-acetyl-sn-glyceryl-3-phosphorylcholine	0.213442	1.49327	0.000932292	578.303	365.87			Organic nitrogen compounds	Organonitrogen compounds	Quaternary ammonium salts	2191.34	2958.47	1367.27	1909.19	1996.37	1972.65	2867.47	3177.04	2967.92	3230.65	3226.91	3039.47	2753.06	2734.17	2753.07
M550T177	[M+H]+	1-o-hexadecyl-2-o-(2e-butenoyl)-sn-glyceryl-3-phosphocholine	0.571462	1.00894	0.979616	550.385	177.188			Lipids and lipid-like molecules	Glycerophospholipids	Glycerophosphocholines	59168.1	16574.2	77211.9	10650.6	56964.7	26061.5	35487.7	41567	25949.5	31073.6	83625.4	31133	53498.6	42594.9	53467.9
M793T37	[M+H]+	1-o-hexadecyl-2-o-(4z,7z,10z,13z,16z,19z-docosahexaenoyl)-sn-glyceryl-3-phosphorylcholine	2.38013	0.213326	0.212401	792.589	37.4035	HMDB0013409		Lipids and lipid-like molecules	Glycerophospholipids	Glycerophosphocholines	15878.3	187660	79435.4	543079	17080.3	15802	24644	39982.7	28923.9	29212.7	28499.4	31970.2	94475.5	94674.2	94606.6
M184T467	[M+H-C21H41O3N]+	1-o-hexadecyl-2-o-(n-methylcarbamoyl)-sn-glyceryl-3-phosphorylcholine	1.0061	1.10224	0.580541	184.073	467.447			Lipids and lipid-like molecules	Glycerophospholipids	Glycerophosphocholines	320104	443179	384105	353916	481069	219817	531130	221591	560307	292681	407598	414024	413822	411508	411524
M552T155	[M+H]+	1-octadecyl-2-acetyl-sn-glycero-3-phosphocholine	0.52958	1.5556	0.00116552	552.4	154.636			Lipids and lipid-like molecules	Glycerophospholipids	Glycerophosphocholines	11239.9	10040.6	13795.4	7622.83	7563.49	10391.8	14303.4	16642.3	13641.6	14017.1	17769.3	17980	13741.4	13754.7	13061.9
M566T194	(M-H+2Na)+	1-Oleoyl-sn-glycero-3-phosphocholine	0.562457	2.30026	0.0270924	566.308	194.188						2280.61	6740.69	12502	6276.9	2492.82	1706.31	12256.2	14973.7	2244.87	15009.1	16134.8	12988.1	9013.27	8824.17	8829.08
M688T285	[M+Na]+	1-palmitoyl-2-azelaoylphosphatidylcholine	0.225956	3.6321	0.00245959	688.438	284.726			Lipids and lipid-like molecules	Glycerophospholipids	Glycerophosphocholines	155.746	286.297	1188.02	591.69	301.304	65.6025	851.156	1227.1	2250.98	2108.2	1207.24	1757.57	1166.03	1139.83	1139.83
M610T162	[M+H]+	1-palmitoyl-2-glutaryl phosphatidylcholine	0.247115	2.01781	0.0286449	610.355	161.723			Lipids and lipid-like molecules	Glycerophospholipids	Glycerophosphocholines	977.38	1237.77	2609.3	678.97	866.252	1014.91	2199.85	4093.97	2849.8	2710.74	1347.54	1698.79	1830.19	1810.54	1702.8
M454T191	[M+H]+	1-palmitoyl-2-hydroxy-sn-glycero-3-phosphoethanolamine	0.989581	0.997214	0.985573	454.292	190.937	HMDB0011503		Lipids and lipid-like molecules	Glycerophospholipids	Glycerophosphoethanolamines	183703	115543	112676	77660.7	182800	169975	148743	139000	96489.5	125009	166318	164452	140535	139510	140537
M313T146	(M+H-H2O)+	1-Palmitoylglycerol	1.16547	0.237962	0.177721	313.273	145.553						872.701	109554	31451.9	77254.5	659.495	629.208	4168.5	2731.74	1026.59	16827	7254.82	20443.2	22579.7	22580	22282.1
M105T165	[M+H-H2O]+	1-phenylethanol	0.466986	0.135066	0.13129	105.069	165.09	HMDB0032619	C07112				197.531	10628.5	2548.45	15572	680.791	651.223	167.505	1179.19	104.868	1179.19	1179.19	279.663	2227.2	2193.9	1714.37
M691T386	[2M+H]+	1-piperidinecarboxamide, n-phenyl-4-(3-quinolinylmethyl)-	0.170516	1.04817	0.909593	691.375	386.06						267.839	4684.37	2621.21	3105.55	369.434	405.299	2010.38	2111.3	1241.23	2895.11	2272.34	1475.12	3171.49	3189.59	3541.85
M811T37	[M+H]+	1-stearoyl-2-arachidonyl-sn-glycero-3-phosphocholine	0.76852	0.653257	0.0354153	810.598	37.098			Lipids and lipid-like molecules	Glycerophospholipids	Glycerophosphocholines	43191.3	33082.9	27844.5	20198.1	46670.5	50273.7	18196	19239.9	30456.3	21835	24669.6	30143.6	30390.6	31056	31560.5
M546T176	(M+Na)+	1-Stearoyl-2-hydroxy-sn-glycero-3-phosphocholine	1.78566	1.34649	0.229514	546.355	175.879						180466	81846.7	331423	30093.3	159577	230515	226637	271376	193746	216534	262636	194309	318871	318972	318871
M854T410	[M-2H+3Na]+	1-stearoyl-2-linoleoyl-sn-glycero-3-phospho-l-serine	0.188895	2.7497	0.00153653	854.482	409.571	HMDB0012380		Lipids and lipid-like molecules	Glycerophospholipids	Glycerophosphoserines	237.076	617.334	1041.85	308.517	70.1702	75.9909	1023.28	1136.22	972.398	1064.05	1251.35	1017.06	658.475	596.012	572.368
M524T181	[M+H]+	1-Stearoyl-sn-glycerol 3-phosphocholine(LPC(18:0))	1.59007	1.07818	0.547972	524.369	180.936	HMDB0010384	C04230	Lipids and lipid-like molecules	Glycerophospholipids	Glycerophosphocholines	440843	268130	376036	181077	413989	437811	420741	366010	351723	365846	397384	381749	368650	367790	369354
M779T137	[M+H]+	1,2-di-(9z,12z,15z-octadecatrienoyl)-sn-glycero-3-phosphocholine	10.1175	0.871326	0.39282	778.539	136.724	HMDB0008206		Lipids and lipid-like molecules	Glycerophospholipids	Glycerophosphocholines	1.31563e+07	8.86667e+06	9.31307e+06	6.23528e+06	1.0978e+07	1.61861e+07	1.03805e+07	1.08657e+07	1.02525e+07	6.93014e+06	9.63891e+06	8.33789e+06	1.04476e+07	1.04658e+07	1.04475e+07
M72T289_2	[M+H-NH3]+	1,2-diamino-2-methylpropane	1.62774	0.968701	0.913196	72.0809	288.957			Organic nitrogen compounds	Organonitrogen compounds	Amines	173676	313847	452887	317202	335046	131416	183287	137992	108741	322519	435725	481848	268406	276153	268456
M655T424	[M-H+2Na]+	1,2-dilauroyl-sn-glycero-3-phospho-sn-glycerol	0.525196	4.03678	5.24404e-05	655.377	424.494			Lipids and lipid-like molecules	Glycerophospholipids	Glycerophosphoglycerols	676.19	1583.53	4984.05	573.541	1149.82	1192.3	5523.79	7621.18	6013.13	7375.8	7603.83	6873.61	4771.45	4856.13	4898.09
M602T365_3	[M+Na]+	1,2-dilauroyl-sn-glycero-3-phosphoethanolamine	0.514318	4.90342	0.000168865	602.362	364.769			Lipids and lipid-like molecules	Glycerophospholipids	Glycerophosphoethanolamines	590.147	1960.02	2927.14	1133.86	656.296	967.319	8622.35	9606.33	4085.93	5905.49	5386.44	6772.01	3976.79	4085.71	4041.42
M97T280	[M+H]+	1,2-dimethylimidazole	0.43761	1.11889	0.239515	97.0751	280.368			Organoheterocyclic compounds	Azoles	Imidazoles	24101.7	18447.2	18052.6	20905.3	25476.9	28670.1	25918.2	26453.7	30710.8	23393.1	23586	21719.3	23416.8	24069.8	23417.5
M723T339	[M+Na]+	1,2-dioleoyl-sn-glycero-3-phosphate	0.191081	2.1487	0.0521223	723.475	339.013	HMDB0007865		Lipids and lipid-like molecules	Glycerophospholipids	Glycerophosphates	1646.25	1100.87	868.753	1100.87	21.8727	1710.61	3347.61	3823.34	538.906	1971.96	2727.59	1448.05	1428.01	1387.27	1428.52
M731T139	[M+H]+	1,2-dipalmitoleoyl-sn-glycero-3-phosphocholine	0.926799	0.740127	0.0470853	730.535	139.31	HMDB0008002		Lipids and lipid-like molecules	Glycerophospholipids	Glycerophosphocholines	80859.9	59627.5	63567.4	41152.5	89076.9	85120.4	47131.8	49204.4	50658.9	43797.9	56778.5	62841.3	62835	62835.4	62647.8
M971T288	[M+H]+	1,2-dipalmitoylphosphatidylinositol-4,5-diphosphonate	0.548597	4.34367	0.0010907	971.46	288.327			Lipids and lipid-like molecules	Glycerophospholipids	Glycerophosphoinositol phosphates	484.793	4830.81	3537.48	885.589	1169.72	329.762	6749.5	12819.3	7085.1	10363.4	5674.25	6123.3	5985.6	5712.94	6042.46
M707T141_1	[M+H]+	1,2-dipentadecanoyl-sn-glycero-3-phosphocholine	0.259142	1.24779	0.111434	706.537	141.103	HMDB0007934		Lipids and lipid-like molecules	Glycerophospholipids	Glycerophosphocholines	7758.85	6338.58	5968.82	5838.22	9695.2	6576.03	8172.71	12072.4	8762.37	6065.66	9234.86	8318.29	8147.86	8148.19	8084.1
M679T143	[M+H]+	1,2-ditetradecanoyl-sn-glycero-3-phosphocholine	0.200398	0.699049	0.0260672	678.506	142.983	HMDB0007866		Lipids and lipid-like molecules	Glycerophospholipids	Glycerophosphocholines	3288.26	2362.05	3786.09	2329.25	3138.04	3807.52	2862.69	2350.92	2682.71	1384.41	2214.28	1585.04	2248.46	2246.46	2410.41
M474T444	[M+H]+	1,3-propanediol, 2-amino-2-[2-[4-[[6-[(7-nitro-2,1,3-benzoxadiazol-4-yl)amino]hexyl]oxy]phenyl]ethyl]-	0.122409	1.19528	0.551015	474.253	443.932						540.35	2514.95	1778.64	2541.85	963.925	4629.85	4150.2	1826.62	2734.92	2093.6	2162.28	2534.68	1779.75	1644.49	2351.4
M159T248	[M+H]+	1,5-diaminonaphthalene	0.460134	0.816278	0.384582	159.091	247.824		C19463				26563.4	20141.3	25692.8	20773	36500.6	12931.9	15147.6	12152.6	8004.71	25606.5	28146	27346.3	21546.1	21992.4	21539.6
M351T125_2	[M+H-H2O]+	11-dehydrothromboxane b2	0.591264	0.326307	0.0394482	351.214	125.344		C05964	Lipids and lipid-like molecules	Fatty Acyls	Eicosanoids	3836.24	19078.7	11290.6	20757	5305.16	5614.07	2976.37	2591.66	359.529	5402.36	5209.84	4957.93	10563.2	10256.1	10554.3
M349T35	[M+H]+	11.beta.,21-dihydroxy-5.beta.-pregnane-3,20-dione	0.743227	0.458755	0.0649274	349.237	35.1395		C05475	Lipids and lipid-like molecules	Steroids and steroid derivatives	Hydroxysteroids	17240.5	58060.3	13101.8	22357.7	24313.7	21565.1	9191.5	10107.2	5932.15	14786.5	15972.4	15869.3	14656.6	14647.2	15327.3
M277T56	[M+H-H2O]+	13-keto-9z,11e-octadecadienoic acid	3.54564	0.752544	0.56398	277.216	56.004	HMDB0004668		Lipids and lipid-like molecules	Fatty Acyls	Lineolic acids and derivatives	70615.1	1.16213e+06	900795	1.36402e+06	87753.7	97994.8	407675	397392	172249	690689	576538	527312	791681	752864	792138
M604T406	[M+H]+	14-benzoylaconine	0.21384	1.6318	0.104182	604.304	406.108			Lipids and lipid-like molecules	Prenol lipids	Diterpenoids	1019.22	2178.39	3055.67	2655.93	1134.58	1111.58	3440.49	3904.22	2460.76	4132.11	564.53	3701.2	2990.57	2965.08	2990.58
M284T123	[M+K]+	15-deoxy-goyazensolide	0.310017	0.53732	0.100538	284.33	122.615			Organoheterocyclic compounds	Lactones	Gamma butyrolactones	2666.45	7381.23	4258.39	8974.06	3841.03	2266.06	2106	5591.8	1896.34	2512.49	1925.9	1757.82	4986.38	4982.99	4888.93
M375T491	[M+Na]+	15-ketoprostaglandin f2.alpha.	0.232085	0.727597	0.078937	375.223	491.035	HMDB0004240		Lipids and lipid-like molecules	Fatty Acyls	Eicosanoids	6479.76	5949.2	3466.23	3214.52	5463.76	4875.01	4576.27	2941.54	3581.18	2560.63	2747.78	5019.23	4001.9	4048.6	4033.98
M543T331	[M+H-H2O]+	15s-hydroxy-5z,8z,11z,13e-eicosatetraene-(2-biotinyl)hydrazide	0.43733	0.586704	0.148864	543.36	330.767						6094.48	17993.8	10153	14715.1	4582.8	4025.15	5061.72	2841.1	3590.05	7966.53	5582.39	8731.5	7969.52	7747.91	7971.13
M295T79	(M+Na)+	16-Hydroxypalmitic acid	1.40584	0.947476	0.92468	295.226	79.216	HMDB0006294	C18218	Lipids and lipid-like molecules	Fatty Acyls	Fatty acids and conjugates	24232.5	85506.3	131603	338035	14914.2	28801.4	55529.6	76286	40000.1	211001	85719.1	121829	137093	137391	136344
M569T319	[2M+H]+	16-oxocafestol	0.228193	1.89256	0.00243054	569.339	319.331						985.687	788.433	2036.71	1697.13	1104.01	711.395	1732.6	2211.9	2275.64	2400.91	2266.47	2972.36	2201.46	2160.32	2201.42
M601T279	[2M+H]+	17-epimethandienone	0.184738	1.38306	0.348267	601.402	278.806			Lipids and lipid-like molecules	Steroids and steroid derivatives	Androstane steroids	861.046	4688.21	2347.05	2742.77	605.233	442.401	2995.66	2211.25	2113.97	4303.67	2470.52	2068.33	2389.25	2335.03	2631.69
M344T322	[M+H-NH3]+	1h-indazole-1-pentanoic acid, 3-[[[1-(aminocarbonyl)-2-methylpropyl]amino]carbonyl]-	0.434367	0.484941	0.170004	344.155	321.878			Organic acids and derivatives	Carboxylic acids and derivatives	Amino acids, peptides, and analogues	2184.56	16957	10017.6	11967.8	2802.85	2151.03	3010.46	2431.83	1478.91	5197.97	3248.63	6978.66	8869.64	9110.81	8868.56
M219T374	[M+H]+	1h-indol-4-ol, 3-[2-(ethylmethylamino)ethyl]-	0.642286	0.524024	0.21517	219.133	374.176			Organoheterocyclic compounds	Indoles and derivatives	Tryptamines and derivatives	12574.4	74918.3	35021.2	15423.4	17158.2	12856	18524.8	11773	12891.2	15210.7	11606.9	18004	35758	41632.5	41646.1
M616T406	[M+Na]+	2-(5-oxovaleryl)phosphatidylcholine	0.352864	2.05065	0.0127826	616.339	405.519			Lipids and lipid-like molecules	Glycerophospholipids	Glycerophosphocholines	1256.93	3369.98	5904.2	2014.67	721.17	1787.35	5701.47	4610.09	6596.93	4380.91	3941.1	5640.61	4359.29	4199.44	4031.07
M182T333	[M+H]+	2-(benzylmethylamino)ethanol n-oxide	0.14141	0.831662	0.116612	182.117	332.622						3183.73	3153.23	3495.61	3415.05	3620.71	4317.55	3613.76	1888.86	2471.9	2540.16	3549.57	3555.24	3208.9	3240.45	3240.52
M622T334	[3M+H]+	2-(cyclohexylamino)ethanesulfonic acid	0.229505	0.787221	0.589315	622.278	333.96			Organic nitrogen compounds	Organonitrogen compounds	Cyclohexylamines	541.183	6360.22	1905.39	6057.62	2255.25	497.299	1970.24	2481.44	951.197	3179.51	2623.79	2662.27	1998.5	1926.88	1928.39
M955T287	[M+K]+	2-[[6-[[17-[5,6-dimethyl-3-[3,4,5-trihydroxy-6-(hydroxymethyl)oxan-2-yl]oxyhept-5-en-2-yl]-1-hydroxy-10,13-dimethyl-2,3,4,7,8,9,11,12,14,15,16,17-dodecahydro-1h-cyclopenta[a]phenanthren-3-yl]oxy]-3,4,5-trihydroxyoxan-2-yl]methoxy]-6-(hydroxymethyl)oxane-3,4,5-triol	0.860641	6.60982	0.000271466	955.486	287.096			Lipids and lipid-like molecules	Steroids and steroid derivatives	Steroidal glycosides	301.424	7405.49	6510.51	964.092	398.35	237.78	14965.5	27145.4	17646	20229.6	11627.3	12938	11724.5	11289.6	11719.6
M1060T430	[M+Na]+	2-[2-[5-[4-[4,5-dihydroxy-6-methyl-3-(3,4,5-trihydroxy-6-methyloxan-2-yl)oxyoxan-2-yl]oxy-1,2,4a,5-tetramethyl-2,3,4,7,8,8a-hexahydronaphthalen-1-yl]-3-methylpent-1-en-3-yl]oxy-5-hydroxy-6-methyl-3-(3,4,5-trihydroxy-6-methyloxan-2-yl)oxyoxan-4-yl]oxy-6-methyloxane-3,4,5-triol	0.218437	0.701524	0.530072	1059.53	430.499			Lipids and lipid-like molecules	Prenol lipids	Terpene glycosides	491.938	3237.49	1442.55	6028.76	514.957	416.765	1251.33	1690.82	970.184	1907.75	1677.93	1013.21	1924.12	1924.62	1848.37
M1144T454	[M+Na]+	2-[5-hydroxy-4-methoxy-6-[4-methoxy-6-[4-methoxy-6-[4-methoxy-2-methyl-6-[[(3s,10r,11s,12s,13s,14s,17s)-11,12,14-trihydroxy-17-[(1s)-1-hydroxyethyl]-10,13-dimethyl-1,2,3,4,7,8,9,11,12,15,16,17-dodecahydrocyclopenta[a]phenanthren-3-yl]oxy]oxan-3-yl]oxy-2-methyloxan-3-yl]oxy-2-methyloxan-3-yl]oxy-2-methyloxan-3-yl]oxy-6-(hydroxymethyl)oxane-3,4,5-triol	0.239826	4.48519	2.46252e-05	1143.59	454.031			Lipids and lipid-like molecules	Steroids and steroid derivatives	Steroidal glycosides	140.814	689.177	662.72	206.15	113.697	126.265	1396.61	1696.73	1148.99	1299.73	1335.19	1818.74	811.775	790.995	811.603
M120T247	[M+H-H2O]+	2-amino-1-phenylethanol	7.90417	0.690114	0.184796	120.081	247.208	HMDB0001065	C02735	Organic nitrogen compounds	Organonitrogen compounds	Amines	3.85898e+06	4.97477e+06	5.72403e+06	4.27106e+06	6.81381e+06	2.26241e+06	2.02965e+06	1.57479e+06	960842	4.5686e+06	4.57528e+06	5.54852e+06	4.20182e+06	4.20177e+06	4.16777e+06
M162T400	[M+H]+	2-aminoadipic acid	0.33415	0.820374	0.440693	162.075	399.9	HMDB0000510	C00956	Organic acids and derivatives	Carboxylic acids and derivatives	Amino acids, peptides, and analogues	19105.4	21732.8	8535.6	9638.65	8818.66	28241.8	17542.7	10913.6	10354.2	12916.9	16030.7	11057.7	15061.2	15061.5	14985.9
M419T169	[M+2H]2+	2-butenoyl coenzyme a	0.464435	0.321813	0.000166356	418.553	168.925	HMDB0002009		Lipids and lipid-like molecules	Fatty Acyls	Fatty acyl thioesters	8154.64	6766.74	4574.52	6693.12	4802.02	7409.24	1468.89	2029.97	3761.36	2327.91	335.04	2434.52	3907.32	4111.47	4115.08
M293T108	[M+H-H2O]+	2-cyclopentene-1-octanoic acid, 5-(2-carboxyethyl)-.epsilon.,4-dioxo-, (1s,5r)-	0.561961	0.439771	0.0194975	293.138	107.645			Organic acids and derivatives	Keto acids and derivatives	Medium-chain keto acids and derivatives	10327.7	14834.5	5860.53	20711.9	11135.8	7638.79	3432.32	1974.44	5361.47	8339.1	5759.69	6140.86	8596.91	8872	8874.56
M113T413	[M+H]+	2-furancarboxylic acid	0.803763	0.106252	0.0748908	112.999	413.379	HMDB0000617	C01546	Organoheterocyclic compounds	Furans	Furoic acid and derivatives	4126.92	30637.6	5760.81	40048.2	4547.27	3411.16	1480.6	888.062	954.829	1847.83	2334.39	1900.97	8605.85	8605.56	8771.45
M99T248	[M+H]+	2-hexenal	0.912312	0.810349	0.615672	99.0912	248.384		C08497	Organic oxygen compounds	Organooxygen compounds	Carbonyl compounds	86910.1	22412.6	29804.6	13728.6	27667.6	121817	38614	46615	62072.4	35210.2	30760.4	31729.4	40173.2	40743.3	40744.5
M152T252	(M+H)+	2-Hydroxyadenine	0.905269	0.663091	0.156411	152.056	251.572	HMDB0000403		Organoheterocyclic compounds	Imidazopyrimidines	Purines and purine derivatives	30043.4	96189.6	65864.5	73692.1	27844.9	30718.4	42616	38683.3	28980	30897.1	36277.4	37621.8	47914.3	47916.3	46243.3
M107T247	[M+H-H2O]+	2-hydroxybenzyl alcohol	0.539574	0.719645	0.154704	107.048	247.217	HMDB0059709	C02323	Benzenoids	Benzene and substituted derivatives	Benzyl alcohols	19881.3	25816.7	30259.5	22095.1	32059.3	14655.4	12179.2	10681.4	6767.25	23396.5	23485	27671.7	22132.9	22132.6	21876.6
M113T223	[M+H]+	2-imino-4-methylpiperidine	0.893248	1.95127	0.0154778	113.107	223.06			Organoheterocyclic compounds	Pyridines and derivatives	Hydropyridines	26198.8	10568	20526.3	11828.3	17032.7	24734.6	32849.4	37935.2	61424.7	32599.6	25395.5	26169.6	25558	25570.1	24461.2
M103T341_1	[M+H]+	2-ketobutyric acid	0.406844	0.94514	0.685938	103.038	340.914	HMDB0000005	C00109	Organic acids and derivatives	Keto acids and derivatives	Short-chain keto acids and derivatives	26766.6	16564	17991.3	14319.5	23467	28442.2	25176.2	21350.4	21977.3	14354.8	19429.1	18265.3	21015.6	20935.8	20935.7
M327T34_1	[M+H]+	2-methoxy-17.alpha.-ethynylestradiol	0.601872	1.43654	0.172389	327.216	33.8545			Lipids and lipid-like molecules	Steroids and steroid derivatives	Estrane steroids	11820.6	22718.1	26388.7	15211.9	22824.3	11620.3	16045.5	23715.7	10017.9	35490.8	33953.9	39634.6	21264.3	21993.4	21749.3
M170T335	[M+H]+	2-methoxy-5-nitrophenol	0.836294	0.442883	0.0741791	170.055	335.198		C17385	Benzenoids	Benzene and substituted derivatives	Nitrobenzenes	59048.4	16717.3	14044.6	10706.8	26472.6	31897.2	10281.8	9680.51	6978.37	13287.8	14543.1	15596.8	14961.1	15081.2	14959
M246T230	M+	2-Methylbutyroylcarnitine	0.423774	0.646245	0.00671166	246.169	229.765						10182.8	11242.9	9063.99	10197.7	10713.6	12676.1	7423.7	4224.2	4591.17	5800.94	9842.52	9527.01	8842.63	9022.62	9021.51
M298T290	(M+H)+	2-Methylguanosine	0.066312	1.04226	0.86416	298.116	289.602	HMDB0005862		Nucleosides, nucleotides, and analogues	Purine nucleosides		1042.23	1341.75	1297.08	1875.42	1221.11	675.566	1814.48	1575.12	847.197	2107.23	613.914	810.181	1715.02	1454.38	1404.57
M579T180	[M+H]+	2-o-rhamnosylvitexin	1.06616	0.14658	0.16896	579.17	179.914		C12628	Phenylpropanoids and polyketides	Flavonoids	Flavonoid glycosides	1204.99	49017	8941.11	90490.3	4669.39	1143.24	3009.61	4422.31	5403.1	2561	3684.67	3707.48	20669.2	21212.7	20631.3
M105T248	[M+H-H2O]+	2-phenylethanol	0.267425	0.720028	0.211261	105.069	247.744	HMDB0033944	C05853	Benzenoids	Benzene and substituted derivatives		4661.18	5710.53	7076.29	5638.61	8079.83	3434.63	3049.44	2025.78	954.887	6428.95	5818.81	6635.87	5677.36	5604.88	5604.88
M454T286	[M+H]+	2-propen-1-one, 1-(3,4-dihydro-6,7-dimethoxy-2(1h)-isoquinolinyl)-3-(1-methyl-2-phenyl-1h-pyrrolo[2,3-b]pyridin-3-yl)-	0.128243	1.15957	0.582351	454.227	286.444			Organoheterocyclic compounds	Pyrroles	Substituted pyrroles	1040.36	3003.83	2685.91	1588.8	1712.97	634.881	1665.68	1363.44	1426.89	2658.36	1848.14	3406.36	2138.54	2044.84	2045.37
M162T110	[M+H-CHNO]+	2-propenamide, 2-cyano-3-(3,4-dihydroxyphenyl)-, (2e)-	0.518878	1.10331	0.605141	162.054	110.135			Phenylpropanoids and polyketides	Cinnamic acids and derivatives	Hydroxycinnamic acids and derivatives	100608	114916	64941.3	57344.4	65835.1	113162	100321	84019.7	88498.5	59611.1	152749	84999.3	97206.9	95215.3	95183.3
M505T406	[M+H]+	2-propenamide, 3,3'-(1,4-phenylene)bis[n-[4-(4,5-dihydro-1h-imidazol-2-yl)phenyl]-	0.0694571	0.941413	0.80622	505.224	406.454			Phenylpropanoids and polyketides	Cinnamic acids and derivatives	Cinnamic acid amides	1927.31	3867.39	3370.91	3008.84	1227.33	2565.49	3512.74	1208.33	2511.84	1018.64	2979.9	3800.34	3100.57	3144.13	3101.09
M355T264	[M+H-H2O]+	2,4-thiazolidinedione, 5-[[4-[2-(5-ethyl-2-pyridinyl)-2-hydroxyethoxy]phenyl]methyl]-	0.494155	0.280692	0.0166217	355.102	263.906						2239.81	11482	5266.79	12665.8	4171.88	13785.6	1401.93	1357.62	1126.9	3270.03	3168.81	3600.38	5850.79	5841.07	6778.15
M707T389	[2M+Na]+	2.alpha.-mannobiose	0.33328	0.583025	0.041168	707.221	388.521			Organic oxygen compounds	Organooxygen compounds	Carbohydrates and carbohydrate conjugates	8928.55	8279.95	8341.14	9150.67	8223.98	3846.56	6263.57	6214.29	8309.39	2219.11	1306.86	2955.38	6189.8	6326.38	6189.49
M332T410	[M+H]+	2'-deoxyadenosine 5'-monophosphate	0.284047	1.76366	0.00287949	332.075	410.108	HMDB0000905	C00360	Nucleosides, nucleotides, and analogues	Purine nucleotides	Purine deoxyribonucleotides	2624.66	1167.03	2130.75	2111.07	2769.01	2826.4	4244.87	3534.13	2854.75	3405.87	5027.69	4969.47	3358.32	3459.82	3458.87
M455T199	[2M+H]+	2'-deoxycytidine	1.07774	0.0540105	0.176115	455.188	199.22	HMDB0000014	C00881	Nucleosides, nucleotides, and analogues	Pyrimidine nucleosides	Pyrimidine 2'-deoxyribonucleosides	617.86	45875.5	2565.91	91535.6	850.257	805.596	1235.32	560.577	862.11	1851.53	1480.37	1693.12	6009.5	6009.66	6095.5
M137T209_2	[M+H-C5H8O3]+	2'-deoxyinosine	1.13793	1.06174	0.77222	137.045	208.63	HMDB0000071	C05512	Nucleosides, nucleotides, and analogues	Purine nucleosides	Purine 2'-deoxyribonucleosides	206649	271749	404380	160046	166724	225490	371140	319540	151495	189556	250246	241670	244002	246115	244001
M321T31_2	[M+H]+	20-hydroxyarachidonic acid	2.88783	0.050098	0.16014	321.242	31.1065	HMDB0005998	C14748	Lipids and lipid-like molecules	Fatty Acyls	Fatty acids and conjugates	8685.02	699840	21314.5	419629	7498.14	5491.11	15769.1	8723.75	6544.88	6215.56	12662.8	8320.69	81972.1	81964	84699.9
M434T32	(M+NH4)+	24,25-Hydroxyvitamin D3	4.32874	1.3193	0.57541	434.362	31.8815						7187.45	1.54342e+06	1.52691e+06	1.45973e+06	3070.42	5223.26	624185	976623	2.0802e+06	1.18782e+06	327426	800696	863027	848208	848272
M226T345	[M+H]+	3-(n-morpholino)-2-hydroxypropanesulfonic acid	0.100338	0.889577	0.624841	226.08	345.334			Organoheterocyclic compounds	Oxazinanes	Morpholines	2816.27	2430.96	2934.58	2436.21	951.642	641.156	1752.57	1440.75	1138.81	1999.95	2435.76	2094.62	2545.12	2111.82	2509.92
M140T105	[M+H]+	3-amino-2,3-dihydrobenzoic acid	0.759658	0.437541	0.142029	140.07	104.781		C12110	Organic acids and derivatives	Carboxylic acids and derivatives	Amino acids, peptides, and analogues	30484.5	15537.2	8404	31422.2	73036.9	17299.1	3993.43	7196.13	4551.71	17096.4	31143.8	13106.2	22020.7	22118.1	22383.4
M120T45	(M+H-H2O)+	3-Aminobenzoic acid	0.29449	0.703441	0.106195	120.043	45.285						6183.57	7798.65	11787.8	8770.45	7830.26	4652.86	3781.23	3991.31	4349.11	4643.9	7585.28	8727.5	5093.28	5253.72	5259.81
M97T336	(M+H-H2O)+	3-Cyano-L-alanine	0.25267	0.812383	0.387978	97.039	336.497						18733	8303.26	10944.2	5955.68	6860.17	7746.15	7195.01	7463.62	5372.24	9620.88	9251.69	8655.44	9738.9	9758.93	10053.8
M116T197	[M+H-CO2]+	3-dehydrocarnitine	0.265415	0.714312	0.0353194	116.106	196.857	HMDB0012154	C02636	Organic acids and derivatives	Keto acids and derivatives	Short-chain keto acids and derivatives	7670.04	7835.17	5589.31	5655.13	6801.86	6191.78	6558.99	4654.94	5583.7	3406.3	5926.71	2258.47	5994.44	6153.35	5994.95
M630T479	[M+H]+	3-deoxyaconitine	0.207041	1.8316	0.00599564	630.344	478.709			Lipids and lipid-like molecules	Prenol lipids	Diterpenoids	692.724	1060.91	1991.39	1167.73	506.888	609.438	1885.78	1974.89	1699.38	1475.99	2060.75	1946.04	1206.55	1198.5	1206.55
M244T389	[M+H]+	3-hydroxy-c8-homoserine lactone	0.394128	1.35507	0.0595657	244.165	389.264			Organic acids and derivatives	Carboxylic acids and derivatives	Amino acids, peptides, and analogues	13804.1	7307.79	9787.67	4855.95	9778.69	12191.7	16899.7	13788.1	13128.4	10207.7	11887.5	12311.2	11737.9	11788.7	11804.1
M225T276	(M+H)+	3-Hydroxy-L-kynurenine	0.274985	0.621107	0.0139255	225.087	275.747	HMDB0011631	C03227	Organic oxygen compounds	Organooxygen compounds	Carbonyl compounds	4458.82	3779.62	3639.28	3177.35	4931.58	6664.96	3142.6	2727.7	1791.21	2473.65	3496.9	2921.43	3371.4	3295.94	3295.74
M248T311	[M+H]+	3-hydroxybutyrylcarnitine	0.168492	0.716483	0.0452	248.149	311.483	HMDB0062735		Lipids and lipid-like molecules	Fatty Acyls	Fatty acid esters	2555.38	1445.74	1395	2188.25	2529.36	2822.11	1955.49	1253.61	1570.36	1359.44	1677.59	1451.82	1973.33	1911.9	1911.94
M503T411	[M+H-H2O]+	3-hydroxystanozolol glucuronide	0.534584	2.87425	0.00768939	503.281	411.469			Lipids and lipid-like molecules	Steroids and steroid derivatives	Steroidal glycosides	1871.4	6047.73	5782.65	3043.4	2245.34	1057.07	8682.77	8608.33	5338.41	14088	15084.6	5819.69	5693.78	5369.82	5701.92
M69T266	[M+H-H2O]+	3-methyl-2-buten-1-ol	0.380402	1.20705	0.452132	69.0692	265.592	HMDB0030124	C01390	Organic oxygen compounds	Organooxygen compounds	Alcohols and polyols	8317.38	13531.2	21217.1	15187.4	15279.5	3710.51	13894.7	11736.6	7983.61	16455	18921.3	24244.7	13979.8	14358.5	14388.2
M458T340	[M+Na]+	3-oxazolidinecarboxylic acid, 2,2-dimethyl-4-(1-oxo-2-hexadecyn-1-yl)-, 1,1-dimethylethyl ester, (4s)-	0.173129	0.747787	0.55137	458.332	340.248			Organoheterocyclic compounds	Azolidines	Oxazolidines	607.25	2200.63	3189.13	4949.94	809.325	644.604	1619.58	1495.35	828.522	3681.03	872.901	775.836	1213.58	1182.63	1183.36
M489T380	[M+H]+	3-quinolinecarboxamide, 6-(2-furanyl)-1,4-dihydro-8-methoxy-4-oxo-1-pentyl-n-tricyclo[3.3.1.1(3,7)]dec-1-yl-	0.232401	1.14884	0.731399	489.255	380.232			Organoheterocyclic compounds	Quinolines and derivatives	Quinoline carboxamides	1173.29	9287.59	7431.89	3245.16	1157.75	1058.5	4933.18	3495.77	1344.71	6226.79	5550.44	5279.43	4203.28	4180.09	4589.63
M183T331	[M+H]+	3,4-dihydroxyhydrocinnamic acid	0.24428	0.710567	0.0126854	183.076	330.992	HMDB0000423	C10447				5118.33	5767.51	3818.67	3646.33	3719.22	5493.02	3645.96	3409.06	3404.83	2458.91	3656.54	3010.11	3988.1	3904.01	3901.65
M507T217	[M+H]+	3,4,5-trihydroxy-6-[5-hydroxy-2-(4-hydroxy-3-methoxyphenyl)-3-methoxy-4-oxochromen-7-yl]oxyoxane-2-carboxylic acid	0.218754	0.437608	0.0122336	507.113	217.396			Phenylpropanoids and polyketides	Flavonoids	Flavonoid glycosides	2609.37	1033.54	896.323	1316.89	2525.25	2316.13	1036.21	923.448	750.426	531.579	745.099	694.545	1450.44	1408.02	1408.11
M325T418	(M+H-H2O)+	3.alpha.-Mannobiose	0.819398	0.28142	0.205645	325.113	418.236						2953.35	25749.5	13464.6	63143.5	2521.13	2349.48	2663.28	2628.09	7422.91	7000.08	5173.91	6119.04	10999.3	10956.4	10999.4
M184T44	[M+H-NH3]+	4-(4-aminophenoxy)aniline	0.353297	1.10923	0.848546	184.059	43.7815		C14759	Benzenoids	Benzene and substituted derivatives	Diphenylethers	19032.3	4942.76	14846.9	10499.7	4584.06	8367.97	2138.25	929.625	2941.31	24350.5	7515.25	31200.8	12364.6	13176	12361.9
M228T516	[M+H]+	4-(4-phenyl-1h-pyrazol-1-yl)piperidine	0.223419	0.57717	0.00545913	228.17	516.209			Organoheterocyclic compounds	Azoles	Pyrazoles	2755.6	3595.22	1871.51	1988.31	2640.19	3126.49	843.913	1941.06	1956.48	1318.87	1647.34	1513.97	2554.38	2498.63	2496.89
M315T161	[M+Na]+	4-[(3-acetyl-2,6-dihydroxy-5-methylphenyl)methyl]-3-hydroxy-2-methyl-2h-furan-5-one	0.23827	0.827466	0.16026	315.106	161.068			Organic oxygen compounds	Organooxygen compounds	Carbonyl compounds	8847.74	12655.8	12325.9	10439.3	7991.04	6959.18	5406.99	8317.87	9058.5	7930.23	9493.44	8794.67	9717.25	9712.93	9414.59
M146T408	(M+H)+	4-acetamidobutanoate	0.156699	0.72231	0.110457	146.08	407.62						2910.45	2485.85	2861.44	1428.95	3413.6	2825.98	2526.11	407.98	2304.49	1743.37	2311.93	2209.84	1181.71	1006.65	1185.93
M95T372	[M+H]+	4-aminopyridine	0.522321	1.50519	0.0582615	95.0597	372.171		C13728	Organoheterocyclic compounds	Pyridines and derivatives	Aminopyridines and derivatives	7851.81	8529.81	9042.74	10878.6	23566.4	17521	26280.8	19979	20476.6	17214.7	18117.3	14418.6	15652.5	14050.9	13942.6
M178T186	[M+H]+	4-benzofuranethanamine, 2,3-dihydro-.alpha.-methyl-	0.625113	0.186405	0.00387271	178.133	186.061						4715.95	13346.1	4464.26	17985	13533.6	10665.7	6023.68	1928.27	2425.42	847.814	566.098	271.083	6302.16	6814.4	6296.28
M137T438	[M+H-H2O]+	4-hydroxy-3-methoxybenzyl alcohol	0.217393	1.07949	0.749855	137.045	437.542	HMDB0032012	C06317	Benzenoids	Phenols	Methoxyphenols	5053.1	2973.57	8399.32	1008.17	3806.6	6517.76	5704.02	5541.72	4281.44	3726.03	5575.84	5135.98	5063.53	4778.86	5064.98
M102T275	[M+H-CH2O2]+	4-hydroxy-l-isoleucine	0.531005	0.342122	0.111454	102.09	275.183			Organic acids and derivatives	Carboxylic acids and derivatives	Amino acids, peptides, and analogues	3661.43	8691.06	3787.5	27945.1	15825.7	3571.24	3366.98	3897.52	4448.6	3373.04	3074.41	3558.07	7605.87	7683.78	7685.22
M168T326	[M+H]+	4-hydroxy-l-phenylglycine	1.03857	1.74235	0.215681	168.076	326.234		C03493	Organic acids and derivatives	Carboxylic acids and derivatives	Amino acids, peptides, and analogues	15914.1	8671	12475.6	9243.9	34909.3	70116.3	53080.2	62731.9	79897.8	20709.9	27946.7	19304	25813.1	26031.1	26031
M557T248	[M+H]+	4-hydroxyatorvastatin lactone	0.366595	0.505832	0.0726145	557.256	247.718			Organoheterocyclic compounds	Pyrroles	Substituted pyrroles	3972.1	8232.56	3376.18	11698.1	14627.8	4901.8	3464.58	4005.7	1964.3	4918.49	4722.2	4602	6057.6	6541.11	6535.68
M121T212	[M+H-H2O]+	4-hydroxyphenethyl alcohol	1.29618	0.289962	0.218357	121.064	212.265	HMDB0004284	C06044	Benzenoids	Phenols	Tyrosols and derivatives	2815.3	112201	19642.1	124723	2689.31	2962.44	11735.4	8463.96	2795.95	23693.7	12986.2	17174.3	27402.8	27721.2	27401.7
M530T348	[M+H]+	4-hydroxyphenylmaraviroc	0.266665	1.27128	0.494832	530.329	347.982						1138.52	6275.59	9098.65	3472.45	1352.88	868.334	3679.56	5877.42	5006.16	5537.23	3677.02	4453.12	4091.82	4091.83	4139.35
M127T335	[M+H]+	4-imidazoleacetic acid	0.453547	0.321143	0.0680787	127.049	335.233	HMDB0002024	C02835	Organoheterocyclic compounds	Azoles	Imidazoles	3176.09	11615.5	4560.84	13631.4	2039.14	2426.71	1748.28	1671.11	1488.56	2455.29	2262.76	2400.69	2801.04	1649.87	2989.01
M121T176	[M+H-H2O]+	4-imidazoleacrylic acid	0.945175	0.0724424	0.0194824	121.039	175.531	HMDB0000301	C00785	Organoheterocyclic compounds	Azoles	Imidazoles	13870.5	22527.3	10435.9	54947.5	11919.9	12829.7	213.825	5364.35	1983.54	954.833	491.427	158.232	8308.96	8315.85	8910.39
M208T234	[M+H]+	4-methoxy-n,n-dimethylcathinone	0.392917	0.398512	0.0775414	208.144	234.349			Organic oxygen compounds	Organooxygen compounds	Carbonyl compounds	13977.4	3647.73	6874.67	1553.29	4209.17	6100.46	1855.91	1134.3	1246.35	4199.45	1826.65	4228.31	5336.88	5138.63	5337.25
M83T373	[M+H]+	4-methyl-1h-pyrazole	0.463819	1.19295	0.224651	83.0598	373.421	HMDB0015344	C07837	Organoheterocyclic compounds	Azoles	Pyrazoles	24129.9	21282.9	22213.7	28663.9	39703	33165	42086.4	21933.4	35335.9	36325.1	38222.2	27894.1	30911.5	34192.4	30923.6
M182T323	[M+H]+	4-methyl-3-nitrobenzoic acid	0.26668	0.513359	0.174783	182.055	323.119			Benzenoids	Benzene and substituted derivatives	Benzoic acids and derivatives	3147.29	781.885	10100.1	11212.5	2294.91	4350.16	2456.72	3436.15	2092.15	2766.55	2623.51	2994.36	2920.12	2999.33	2991.43
M148T47	[M+H-2H2O]+	4-pyridoxic acid	0.798326	0.645008	0.0297664	148.038	46.754	HMDB0000017	C00847	Organoheterocyclic compounds	Pyridines and derivatives	Pyridinecarboxylic acids and derivatives	30371.9	51570.9	44559.9	45227.3	41851.8	34753.2	21471.7	20324.7	18150.7	16561.9	39177.8	44491.3	33401.8	33654.3	33654.5
M486T285	[M+H]+	4-quinazolinamine, 7-[3-(dimethylamino)propoxy]-2-(hexahydro-4-methyl-1h-1,4-diazepin-1-yl)-6-methoxy-n-(1-methyl-4-piperidinyl)-	0.219779	2.43647	0.0150553	486.339	284.506			Organoheterocyclic compounds	Diazanaphthalenes	Benzodiazines	337.119	954.909	1607.48	1153.34	195.583	146.285	2408.23	2495.43	1116.08	1939.58	933.998	1814.3	946.201	1187.54	1146.83
M348T287	[M+H]+	4,5-didemethylsimmondsin	0.144905	0.661988	0.240067	348.129	287.077			Organic oxygen compounds	Organooxygen compounds	Carbohydrates and carbohydrate conjugates	608.505	2273.61	1290.17	2072.71	681.108	546.746	942.488	669.524	576.395	757.117	622.819	1378.59	985.407	950.882	950.263
M159T269	[M+H]+	4,6-dioxoheptanoic acid	0.161671	1.08779	0.690015	159.064	268.661	HMDB0000635		Organic acids and derivatives	Keto acids and derivatives	Medium-chain keto acids and derivatives	3254.51	3084.93	2279.9	1967.01	4136.73	3109.64	2678.19	1913.53	1557.51	4238.21	4667.43	4343.43	2688.18	2687.47	2565.39
M747T488	[M+Na]+	5-[[(2r,3s,4s,5r,6s)-3,4-dihydroxy-6-[[5-hydroxy-2-(4-hydroxyphenyl)-4-oxo-2,3-dihydrochromen-7-yl]oxy]-5-[(2s,3r,4r,5r,6s)-3,4,5-trihydroxy-6-methyloxan-2-yl]oxyoxan-2-yl]methoxy]-3-hydroxy-3-methyl-5-oxopentanoic acid	0.134302	0.418511	0.00322595	747.216	488.25			Phenylpropanoids and polyketides	Flavonoids	Flavonoid glycosides	588.717	704.46	375.443	864.814	858.419	547.09	137.254	73.7342	254.215	449.63	311.843	421.814	491.232	491.391	469.799
M145T50	[M+H-C8H18O2]+	5-androstene-3.beta.,17.beta.-diol	1.26826	0.205073	0.107595	145.1	50.0255	HMDB0003818	C04295	Lipids and lipid-like molecules	Steroids and steroid derivatives	Androstane steroids	7946.54	87762	27413.7	106880	8305.76	6568.76	5087.6	7230.79	4728.19	11409.4	9717.51	12044.1	28605.4	28442.9	28605.4
M493T191	[M+H]+	5-glc tricin	0.214449	1.38163	0.213995	493.133	191.466			Phenylpropanoids and polyketides	Flavonoids	Flavonoid glycosides	3227.28	2774.76	971.189	4271.51	3570.16	4436.74	6247.65	5966.44	3937	5924.51	2133.81	2389.15	4439.61	4577.24	4437.89
M110T47	[M+H]+	5-hydroxy-2-methylpyridine	0.580448	0.604333	0.173313	110.059	46.783			Organoheterocyclic compounds	Pyridines and derivatives	Methylpyridines	18715	42478.8	14453.4	28411.1	9088.64	8684.3	7979.59	16624.6	11048.1	14593.3	12319	11062.2	16842.2	16840.8	16643
M219T399_2	[M+H]+	5-L-Glutamyl-L-alanine	0.443696	1.17041	0.50072	219.097	399.418	HMDB0006248	C03740	Organic acids and derivatives	Carboxylic acids and derivatives	"Amino acids, peptides, and analogues"	18035.5	33522.2	34688.9	18025.8	11671.7	11224.5	21784.2	19385.1	15174.2	27512.1	31800.4	33183.8	22575.6	22576.2	22183.4
M242T192	[M+H]+	5-methyl-2'-deoxycytidine	0.636367	0.107087	0.110795	242.113	192.299		C03592	Nucleosides, nucleotides, and analogues	Pyrimidine nucleosides	Pyrimidine 2'-deoxyribonucleosides	1405.64	17248.8	3798.78	28937.1	2085.96	1474.01	1169.68	409.799	452.944	1517.76	1076.84	1257.44	6048.88	6041.35	5980.57
M126T192	[M+H]+	5-methylcytosine	0.809687	0.0781818	0.112834	126.065	191.935	HMDB0002894	C02376	Organoheterocyclic compounds	Diazines	Pyrimidines and pyrimidine derivatives	2010.57	27114.4	5850.42	46927.3	2403.93	1970.45	1192.91	1008.75	1148.58	1464.37	906.679	1024.01	9047.92	9890.48	9050.87
M281T306	[M+Na]+	5-methyluridine	0.104439	0.780935	0.0176717	281.089	306.484	HMDB0000884					1395.25	1336.68	1265.93	1578.35	1897.7	1416.26	1165.37	1344.85	1250.64	1258.42	978.373	944.99	1555.79	1552.07	1626.69
M126T344	[M+H-C2H4O2]+	5-oxo-1-propyl-2-pyrrolidineacetic acid	0.192924	0.813275	0.137029	126.091	344.115			Organoheterocyclic compounds	Pyrrolidines	N-alkylpyrrolidines	4932.21	8070.02	4979.54	4139.55	5960.84	7776.84	4197.67	4645.57	5294.77	4691.54	5567.99	4765.68	5148.28	5266.59	5146.39
M194T459	[M+H]+	5,6-dihydroxyindole-2-carboxylic acid	0.358464	0.601106	0.196339	194.03	459.427	HMDB0001253		Organoheterocyclic compounds	Indoles and derivatives	Indolecarboxylic acids and derivatives	1868.4	9147.23	2295.74	14212.5	9748.87	7246.36	2910.18	4125.59	5911.3	1001.24	7213.39	5599	5317.05	5691.72	5311.23
M335T33	[M+H]+	5.beta.-pregnane-3.alpha.,17-diol-20-one	0.642266	0.996723	0.974504	335.257	33.198		C14609	Lipids and lipid-like molecules	Steroids and steroid derivatives	Pregnane steroids	180635	164310	117080	119019	145031	158932	153199	191301	120891	127886	154710	134122	129830	133071	129620
M541T348	(2M+K)+	5'-Deoxyadenosine	0.238973	0.536899	0.224308	541.156	347.853	HMDB0001983	C05198	Nucleosides, nucleotides, and analogues	5'-deoxyribonucleosides		617.892	4299.46	2583.81	5378.92	775.799	830.15	1004.85	1759.98	532.585	883.574	1774.58	1821.96	1591.78	1703.6	1702.86
M291T32	[M+H]+	5alpha-androstan-17beta-ol-3-one	0.861798	1.11622	0.634655	291.231	31.878	HMDB0002961	C03917	Lipids and lipid-like molecules	Steroids and steroid derivatives	Androstane steroids	128875	51971.6	74501.5	19421.9	70198	115186	85423	108082	53118.8	79645.1	98886.2	88477	79733	79740.9	78663.2
M246T208	[M+H]+	6-azauridine	0.202142	0.989191	0.932075	246.072	208.24			Organic oxygen compounds	Organooxygen compounds	Carbohydrates and carbohydrate conjugates	9791.12	8755.5	5963.52	7995.03	9228.07	9167.96	7585.68	12471.6	9068.1	6743.5	6737.2	7744.92	9264.56	9240.29	9264.64
M355T300	[M-H2O+H]+	6-hydroxy-2-(1-hydroxy-3-methylbutyl)-1-methoxy-8-methyl-10h-benzo[b][1,5]benzodioxocin-12-one	0.314626	1.79221	0.32189	355.138	300.225			Organic oxygen compounds	Organooxygen compounds	Ethers	231.789	3948.14	3597.44	7763.22	811.219	529.698	2541.75	1782.03	2130.42	11709.6	2645.75	9445.67	3664.31	3366.98	3373.95
M273T288	[M+H]+	6,7-diallyloxy-4-methylcoumarin	0.200063	1.27994	0.281202	273.111	288.327						2923.33	3256	4887.93	3390.31	4930.69	1853.62	3522.79	3661.52	2649.13	4782.89	4855.44	7716.6	5177.34	4986.21	4991.28
M659T416	[M+H]+	7-(triethylsilyl)-10-deacetylbaccatin iii	0.446889	0.313896	0.219939	659.336	415.898			Lipids and lipid-like molecules	Prenol lipids	Diterpenoids	623.33	22011.5	5214.5	10884.9	715.488	546.988	2452.23	1434.41	1326.72	2704.44	2125.14	2511.87	4670.95	4676.94	4676.96
M670T369	[M+H]+	7-benzyl-11,14,20-trimethyl-16-(2-methylpropyl)-10,13-di(propan-2-yl)-17-oxa-1,5,8,11,14-pentazabicyclo[17.3.0]docosane-2,6,9,12,15,18-hexone	0.142624	1.61806	0.212513	670.413	369.046			Organic acids and derivatives	Peptidomimetics	Depsipeptides	64.2028	1702.45	1431.17	727.162	1169.72	78.7641	1192.01	1954.83	1348	2397.52	1047.11	431.528	1223.31	1303.91	1304.58
M166T190	[M+H]+	7-methylguanine	0.37625	0.597604	0.00925075	166.072	189.845	HMDB0000897	C02242	Organoheterocyclic compounds	Imidazopyrimidines	Purines and purine derivatives	9552.21	7930.09	5432.12	6834.98	9362.75	9407.49	3991.31	4744.81	8048.41	4507.5	2531.86	5171.64	6835.33	5681.79	6825.24
M298T288	(M+CH3CN+Na)+	7-Methylguanosine	0.238096	0.884861	0.739581	298.149	288.224	HMDB0001107		Nucleosides, nucleotides, and analogues	Purine nucleosides		2072.19	8878.4	5955.06	6051.53	1913.46	1191.62	1949.72	3061.62	2160.74	5883.69	3723.2	6282.52	5153.36	5057.57	5151.64
M365T33_2	[M+H-2H2O]+	7-oxocholesterol	1.03963	0.59197	0.194682	365.319	33.1955			Lipids and lipid-like molecules	Steroids and steroid derivatives	Cholestane steroids	129815	28598.8	43825.2	19376	51131.3	65481.6	28804.6	32270.6	19793.7	32775.6	45411.7	41164.7	70275.2	70230.5	64838.8
M645T372	[M+H]+	8-iso-prostaglandin a2-biotin	0.269858	3.6586	0.00054576	645.394	372.372			Lipids and lipid-like molecules	Fatty Acyls	Eicosanoids	130.059	1121.01	501.118	1000.38	370.086	261.551	2138.35	2497.57	1128.35	2754.95	2322.31	1539.92	1871.22	1886.15	2113.16
M293T74	[M+H-H2O]+	9-hydroperoxy-10e,12z,15z-octadecatrienoic acid	5.98494	0.0891865	0.142997	293.21	74.397			Lipids and lipid-like molecules	Fatty Acyls	Lineolic acids and derivatives	27481.6	1.80236e+06	278388	2.46481e+06	24070.9	29454.1	57759.9	39273.1	33475.1	182675	5310.32	94134.1	447356	451794	447360
M293T31	[M+H]+	9z,11e,13e-octadecatrienoic acid methyl ester	2.20335	1.43743	0.292207	293.247	31.127			Lipids and lipid-like molecules	Fatty Acyls	Lineolic acids and derivatives	440911	67396.9	175572	29239.3	289882	386276	484022	539752	233578	230924	319640	189067	230709	242363	234313
M628T455	[M+H-H2O]+	Acarbose	0.171421	0.760668	0.130578	628.256	454.698		C06802	Organic oxygen compounds	Organooxygen compounds	Carbohydrates and carbohydrate conjugates	4162.44	3923.42	3541.57	1478.25	4463.94	3268.54	3312.24	3301.59	2491.76	2204.79	1731.33	2809.21	3325.11	3147.05	3146.77
M497T323	[M+H]+	Acetamide, 2-[4-[(5,6-diphenyl-2-pyrazinyl)(1-methylethyl)amino]butoxy]-n-(methylsulfonyl)-	0.185993	1.26303	0.347429	497.211	323.215			Organic nitrogen compounds	Organonitrogen compounds	Amines	1531.12	4996.22	3906.83	3046.7	1487.82	1396.67	2891.66	3192.51	2247.42	4973.3	3326	4039.11	3659.98	3519.95	3517.56
M181T129	[M+H]+	Acetoveratrone	0.648805	0.212127	0.0574837	181.108	129.027			Organic oxygen compounds	Organooxygen compounds	Carbonyl compounds	23157.7	6140.02	1157.07	5740.43	6922.55	25545.9	2311.74	2529.63	2180.33	4400	765.749	2377.96	6785.69	6414.28	6407.69
M693T461	[M+Na]+	Acetyl isogambogic acid	0.128263	1.12266	0.724145	693.318	461.048			Organoheterocyclic compounds	Benzopyrans	1-benzopyrans	630.722	3015.09	2962.53	990.578	649.941	595.361	1798.87	1676.84	1215.33	1899.55	1368.46	1970.04	1559.47	1489.08	1472.81
M204T293	[M+H]+	Acetylcarnitine	0.305764	0.972978	0.896307	204.123	292.614		C02571	Lipids and lipid-like molecules	Fatty Acyls	Fatty acid esters	39324.6	76881.2	73606.9	25286.7	46523.2	31637	50454.9	40539.9	49130.6	37111.9	66866.5	41231.2	52399.1	53165.4	52397.9
M136T159	[M+H]+	Adenine	9.59822	0.0913202	0.117008	136.061	158.622	HMDB0000034	C00147	Organoheterocyclic compounds	Imidazopyrimidines	Purines and purine derivatives	117442	4.66467e+06	936513	6.06551e+06	234992	173076	149089	197559	201090	196863	161321	207471	832343	832243	822708
M268T164	[M+H]+	Adenosine	3.21505	0.821842	0.706185	268.104	163.698	HMDB0000050	C00212	Nucleosides, nucleotides, and analogues	Purine nucleosides		186802	2.76239e+06	1.21812e+06	875018	186820	194278	591299	831292	948807	652756	739688	693360	784861	790666	784832
M330T262	(M+H)+	Adenosine 2',3'-cyclic monophosphate	0.480545	0.142073	0.112701	330.06	261.725						627.575	15795.8	3672.99	12710.3	607.145	534.436	586.813	851.044	550.365	1167.4	697.477	970.049	4752.69	4660.61	4661.46
M348T482	(M+H)+	Adenosine 3'-monophosphate	0.929493	1.51104	0.303611	348.07	482.404	HMDB0003540	C01367	Nucleosides, nucleotides, and analogues	Ribonucleoside 3'-phosphates		75432	103351	91108.8	30380.8	62544.2	77259.7	161294	174015	27327.3	46482.4	212793	43063.4	80263.8	59696.5	86750.7
M428T454	[M+H]+	Adenosine 5'-diphosphate	0.702741	1.62783	0.00596875	428.036	454.208	HMDB0001341	C00008	Nucleosides, nucleotides, and analogues	Purine nucleotides	Purine ribonucleotides	23210.5	12248.2	19079.9	5791.48	24576.8	18346.1	28930.8	28943	29610	26915.7	22859.3	30819.9	23178.4	23003.3	23006.4
M428T488	(M+H)+	Adenosine 5'-diphosphate (ADP)	0.273513	1.37783	0.108597	428.036	488.127	HMDB0001341	C00008	Nucleosides, nucleotides, and analogues	Purine nucleotides	Purine ribonucleotides	5858.98	4404.01	6017.68	3080.06	7123.85	6493.73	6110.24	4607.7	7557.03	6428.98	9194.81	11539.7	5487.87	6520.46	5867.09
M508T483	[M+H]+	Adenosine 5'-triphosphate (atp)	0.242776	1.4834	0.0193289	508.002	482.671	HMDB0000538	C00002	Nucleosides, nucleotides, and analogues	Purine nucleotides	Purine ribonucleotides	3934.08	1675.36	3011.82	1384.84	3883.49	2675.07	4996.2	4107.05	3686.43	3861.85	3807.23	4113.31	3577.08	3445.24	3575.65
M464T487	[M+H]+	Adenylosuccinic acid	0.965811	1.96016	0.00426636	464.081	487.164	HMDB0000536	C03794	Nucleosides, nucleotides, and analogues	Purine nucleotides	Purine ribonucleotides	28044.9	13428.1	26794.8	7957.88	18337.8	31886.2	49824.6	43667.8	26595.5	37431.2	53321	37021.3	26906.4	27088.7	26905.8
M486T487	(M+Na)+	Adenylsuccinic acid	0.211087	1.70389	0.000784339	486.062	487.164	HMDB0000536/HMDB0059653	C03794	Nucleosides, nucleotides, and analogues	Purine nucleotides	Purine ribonucleotides	1656.8	1073.89	1513.35	647.653	1197.38	1682.25	2515.69	2248.5	1810.9	2125.32	2397.25	2143.79	1608.38	1652.86	1608.13
M287T231	[M+2H]2+	Adenylyl(3'-5')cytidine	0.520417	0.303664	0.000565126	287.055	231.253			Nucleosides, nucleotides, and analogues	(3'->5')-dinucleotides and analogues	(3'->5')-dinucleotides	7677.65	11221.3	3743.02	7290.97	7630.63	8664.46	1345.91	1180.97	1822.39	3986.67	2960.96	2740.88	4356.15	4781.09	4373.53
M144T168	[M+H-NH3]+	Ala-Ala	0.19675	2.19615	0.265914	144.08	167.547	HMDB0000303	C00398	Organoheterocyclic compounds	Indoles and derivatives	Tryptamines and derivatives	1932.32	281.888	288.303	417.236	1115.06	1517.24	240.8	923.085	241.901	1373.4	5601.75	3812.15	1349.57	1239.31	1355.27
M232T317	[M+H]+	Ala-Ala-Ala	0.183636	0.797933	0.48359	232.129	316.681			Organic acids and derivatives	Carboxylic acids and derivatives	Amino acids, peptides, and analogues	3008.93	3974.7	3645.4	5638.92	1239.48	1354.79	1532.91	1854.39	1623.5	5047.55	2143.3	2849.13	2682.77	2877.78	2686.13
M317T408	[M+H]+	Ala-Ala-Arg	0.634612	1.82648	0.00739323	317.193	408.208			Organic acids and derivatives	Carboxylic acids and derivatives	Amino acids, peptides, and analogues	6485.54	10809.1	17312.9	11951.9	6764.72	4342.33	17908.2	20800.8	11509.4	20646.7	17395.9	17065.6	10632.4	10632.7	10469
M289T376	[M+H]+	Ala-Ala-Lys	0.150749	1.02139	0.926752	289.176	375.87			Organic acids and derivatives	Carboxylic acids and derivatives	Amino acids, peptides, and analogues	2132.25	5231.32	5311.97	4054.83	4210.55	3101.44	3984.73	1950.03	1909.72	4897.55	6458.11	5356.39	4614.12	4728.06	4613.95
M347T448	[M+H]+	Ala-Glu-Lys	0.400006	2.20508	0.0211822	347.192	448.227			Organic acids and derivatives	Carboxylic acids and derivatives	Amino acids, peptides, and analogues	929.014	4229.59	4488.78	5442.98	1436.63	1345.15	4066.59	10090	6208.19	4740.74	9374.17	4929.79	5474.51	4989.27	4984.12
M275T437	[M+H]+	Ala-Gly-Lys	0.450317	1.47874	0.191743	275.171	437.483			Organic acids and derivatives	Carboxylic acids and derivatives	Amino acids, peptides, and analogues	3458.51	17632.1	12906.2	12333	3594.84	1035.68	13176	15503.9	10758	12530.4	14571.3	8817.75	12547.2	12186.4	12549.2
M359T232	[M+H]+	Ala-Ile-Arg	0.610853	2.04042	0.0280232	359.258	231.724			Organic acids and derivatives	Carboxylic acids and derivatives	Amino acids, peptides, and analogues	9020.57	7660.97	15447.3	2624.8	7623.99	6333.24	15807.4	9414.37	10452.9	14602.7	27364.1	21748.9	15714.1	15588.9	15592
M218T404	[M+H]+	Ala-Lys	0.359505	1.30886	0.475493	218.148	404.484			Organic acids and derivatives	Carboxylic acids and derivatives	Amino acids, peptides, and analogues	2485.85	11368.4	11447.9	17317.2	1811.99	1470.96	18013.6	8279.59	6797.72	7580.66	9153.61	10254.4	10885.9	7311.32	10868.7
M237T224	[M+H]+	Ala-phe	0.342309	0.866681	0.74386	237.122	223.71			Organic acids and derivatives	Carboxylic acids and derivatives	Amino acids, peptides, and analogues	1491.57	7989.54	21662.2	15977.1	5658.36	1790.53	4945.51	6943.99	4082.94	13224.7	7298.48	10798.5	6913.19	7022.96	7023.02
M276T234	[M+H]+	Ala-Trp	0.144541	1.14419	0.566533	276.134	234.142			Organic acids and derivatives	Carboxylic acids and derivatives	Amino acids, peptides, and analogues	3211.36	2806.22	6362.89	2300.86	3602.33	3591.06	2422.03	3384.72	3092.42	6742.75	3825.27	5561.59	3375.58	3375.56	3330.54
M90T354	[M+H]+	Alanine	0.183265	1.0933	0.22369	90.0544	353.61	HMDB0000161	C00041	Organic acids and derivatives	Carboxylic acids and derivatives	Amino acids, peptides, and analogues	8824.18	9733.3	9151.53	8203.75	9312.79	10884.5	10349.5	9036.35	9328.19	8920.14	11550	12160.8	9574.96	9575.14	9408.43
M177T326	(M+H)+	Allantoate/Allantoic acid	0.567133	0.627736	0.0677458	177.065	326.262	HMDB0001209	C00499	Organic acids and derivatives	Carboxylic acids and derivatives	"Amino acids, peptides, and analogues"	20085.3	11001.6	11439.6	13854.2	27679.5	29429.3	14002.4	8296.2	11973.5	11198.3	13877	11894.2	18212.3	18212.3	18348.3
M159T178	[M+H]+	Allantoin	0.417063	0.968946	0.915354	159.05	178.448	HMDB0000462	C01551	Organoheterocyclic compounds	Azoles	Imidazoles	19896.7	7171.88	8552.65	4717.87	12174.3	25204.6	12652	15564.7	18345	12024.3	6024.65	10694.1	13406.6	13398.4	10247.9
M223T354	(M+H)+	Allocystathionine	0.115716	0.845106	0.288577	223.075	354.266	HMDB0000455	C00542	Organic acids and derivatives	Carboxylic acids and derivatives	"Amino acids, peptides, and analogues"	2837.46	3374.69	3766.74	3108.3	2949.97	1537.25	2013.99	2889.93	1681.67	3428.02	2185.74	2652.91	2778.79	2406.42	2455.36
M269T248	(M+H)+	Allopurinol riboside	0.309507	0.893999	0.66871	269.088	248.4	HMDB0000481		Nucleosides, nucleotides, and analogues	"Pyrazolo[3,4-d]pyrimidine glycosides"		13456.2	19397.2	30573	9199.49	13559.8	11544.8	19931.9	14905	8940.31	7448.02	21422.8	14722.9	18037.9	18153.7	18014
M607T31	[M+H]+	Aloeemodin	3.3453	0.0359647	0.15335	607.291	31.267		C09391				6804.14	323471	165791	952333	4813.22	1618.2	3626.36	4050.43	3475.91	12299.6	8635.2	20235.1	151366	146492	146487
M296T35	(M+NH4)+	alpha-Linolenic acid	1.79989	0.713242	0.247231	296.259	35.165	HMDB0001388	C06427	Lipids and lipid-like molecules	Fatty Acyls	Lineolic acids and derivatives	304691	333480	988053	475849	771725	280691	288018	335797	315925	418974	398745	492456	631981	633925	629727
M475T387	[M+NH4]+	Amygdalin	0.138357	0.978405	0.935494	475.177	387.423	HMDB0035030	C08325	Organic oxygen compounds	Organooxygen compounds	Carbohydrates and carbohydrate conjugates	1511.45	3738.38	2771.04	3296.41	1180.31	1104.9	1524.62	1709.42	1632.71	3857.21	2490.13	2094.66	3172.44	3161.41	3585.21
M94T278	[M+H]+	Aniline	0.610658	0.414555	0.00147186	94.0644	277.627	HMDB0003012	C00292	Benzenoids	Benzene and substituted derivatives	Aniline and substituted anilines	18818.4	12171.1	8716.6	10585.9	9563.83	16469	4683.73	4118.6	4081.68	5852.65	6198.28	6705.92	8985.58	8985.85	8914.99
M351T347	[M+Na]+	Anisatin	0.457069	0.319302	0.181395	351.126	346.923		C09294	Lipids and lipid-like molecules	Prenol lipids	Terpene lactones	1370.83	9240.57	4499.9	18677	1722.77	873.818	847.892	1112.2	493.46	2695.87	3674.76	2793.58	4347.83	4183.09	4346.99
M288T46	[M+Na]+	Anisomycin	0.10887	1.03626	0.801237	288.107	45.5325		C11281	Benzenoids	Phenol ethers	Anisoles	10352.6	10592.6	12477.8	9826.28	10719.9	9115.22	5658.11	15975.9	11473.2	10491.9	9282.62	12490.3	12141.8	12031.3	12030.7
M324T353	[M+H]+	Anorexigenic peptide	0.155421	1.26432	0.0327422	324.122	352.991			Organic acids and derivatives	Carboxylic acids and derivatives	Amino acids, peptides, and analogues	2804.12	3061.23	1795.73	2571.23	2635.58	2228.18	2880.08	3194.99	2813.89	3925.71	2699.92	3571.62	2810.65	2802.19	2290.1
M341T55	[M+H]+	Arachidonic sulfonic acid	0.632669	1.6864	0.0063517	341.232	54.863			Organic acids and derivatives	Organic sulfonic acids and derivatives	Organosulfonic acids and derivatives	7409.18	13382.1	20165.6	6677.19	11669.6	9819.55	17065.8	24162.5	17817.6	18464.1	17843.4	21216.2	19772.5	19833.1	17814.6
M246T283	[M+H]+	Arg-Ala	0.652272	1.43955	0.491408	246.144	283.263			Organic acids and derivatives	Carboxylic acids and derivatives	Amino acids, peptides, and analogues	1951.94	35475.9	39744.3	16854.2	2074.6	2161.81	12005.1	13639.6	4654.37	51655.5	23993.8	35506.3	21859.5	21766.9	21767.6
M375T474	(M-H+2Na)+	Arg-Arg	0.0860741	0.908931	0.668214	375.18	473.984						2293.03	3121.14	2743.53	3116.87	1645.41	1866.92	1630.3	3102.3	2315.04	386.286	3139.31	2867.04	1247.94	1761.52	1796.7
M446T437	[M+H]+	Arg-Asp-Arg	0.32066	2.03608	0.0147535	446.234	436.902			Organic acids and derivatives	Carboxylic acids and derivatives	Amino acids, peptides, and analogues	1100.15	3629.27	3785.5	1926.47	1106.7	975.706	4027.45	6691.2	3400.33	3456.9	4303.32	3620.26	4511.95	4269.73	4632.98
M341T394	(M+CH3CN+Na)+	Arg-Cys	0.117179	0.835561	0.351952	341.131	393.655						1030.33	2099.87	2345.15	2052.59	959.327	1853.26	1225.47	2157.94	1628.52	1135.79	1397.21	1095.21	907.469	874.785	907.384
M303T324	[M+H]+	Arg-Gln	0.188781	1.08831	0.853419	303.166	324.47			Organic acids and derivatives	Carboxylic acids and derivatives	Amino acids, peptides, and analogues	572.007	8698.64	3468.75	3372.79	631.749	520.824	2190.81	2997.5	2508.88	4534.46	3592.09	2965.71	3991.14	4002.47	4379.88
M303T399	[M+H]+	Arg-Lys	0.281963	1.40783	0.155237	303.202	399.027			Organic acids and derivatives	Carboxylic acids and derivatives	Amino acids, peptides, and analogues	3150.56	9982.21	6371.51	5101.43	2694.81	2826.62	7048.92	6970.24	4452.57	7654.61	6810.52	9477.16	7178.38	6598.76	7110.69
M288T335	(M+H-H2O)+	Arg-Met	0.726667	1.81728	0.353226	288.145	335.163						1503.31	16355.2	45334.6	16780.9	824.263	1945.48	459.698	23874.8	727.677	56290.8	24555.1	44460.9	24972.5	24494.2	24972.2
M262T410	[M+H]+	Arg-Ser	0.774402	2.2442	0.0150377	262.151	410.171			Organic acids and derivatives	Carboxylic acids and derivatives	Amino acids, peptides, and analogues	3561.66	15993.3	23809.9	9700.72	3958.49	2744.19	21007.2	22587	15705.8	31777	16879.3	26175.8	16714	16406.2	16714.2
M274T408_2	[M+H]+	Arg-Val	0.127578	1.23757	0.232165	274.176	407.718			Organic acids and derivatives	Carboxylic acids and derivatives	Amino acids, peptides, and analogues	1525.95	2751.66	3703.41	2305.36	1249.42	3684.7	2870.67	3225.31	2500.34	3837.24	2817.92	3584.94	2711.42	2631.04	2711.15
M175T509	[M+H]+	Arginine	2.28561	1.17491	0.459001	175.12	509.149	HMDB0000517	C00062	Organic acids and derivatives	Carboxylic acids and derivatives	Amino acids, peptides, and analogues	1.94563e+06	1.43991e+06	1.57876e+06	1.07769e+06	1.78219e+06	1.45614e+06	2.37297e+06	2.35309e+06	793333	1.83203e+06	882087	2.67002e+06	2.0162e+06	1.99277e+06	1.99278e+06
M291T460_2	[M+H]+	Argininosuccinic acid	0.369274	1.12457	0.638511	291.129	459.586	HMDB0000052	C03406	Organic acids and derivatives	Carboxylic acids and derivatives	Amino acids, peptides, and analogues	30484.7	10002	13419.6	8717.73	18947.7	20577.6	24433	28670	11860.9	11592.6	22105.1	16212.5	19579	19397.8	19580.2
M810T319	[M+NH4]+	Ascomycin	0.260074	5.60082	0.000412148	809.524	319.267		C12102				36.6028	335.717	1228.31	32.7678	178.986	24.875	1192.06	1460.92	2320.74	1946.18	1258.75	2111.55	1516.98	1517.1	1488.59
M318T327	[M+H]+	Asn-Gly-Lys	0.215883	1.07942	0.818973	318.165	327.008			Organic acids and derivatives	Carboxylic acids and derivatives	Amino acids, peptides, and analogues	1036.33	4866.73	4224.25	6388.5	1184.78	1085.13	2446.25	3267.58	2074.16	5285.18	3376.68	3827.89	3265.54	3265.57	3243.29
M402T361	[M+H]+	Asn-Ile-Arg	0.836339	3.22494	0.000708918	402.245	361.343			Organic acids and derivatives	Carboxylic acids and derivatives	Amino acids, peptides, and analogues	2619.41	8214.61	15876.4	4890.26	2924.37	2114.97	17295	26134.2	17261.1	24147.3	14656.1	18668	10838.8	10831.6	11887.9
M402T386	[M+H]+	Asn-Leu-Arg	0.618899	2.41515	0.00101781	402.245	386.281			Organic acids and derivatives	Carboxylic acids and derivatives	Amino acids, peptides, and analogues	3649.18	8018.03	10190.7	5186.15	2482.87	2189.08	11116.6	16468.9	10397.2	14893	12268	11455.3	9145	9010.87	9261.22
M261T429	[M+H]+	Asn-Lys	0.583017	2.73206	0.0028514	261.155	428.623			Organic acids and derivatives	Carboxylic acids and derivatives	Amino acids, peptides, and analogues	2677.02	6248.63	8238.46	3978.66	1710.12	1310.66	9308.24	10909.5	6278.95	16622.4	11907.9	10989.3	7502.45	7353.8	7502.94
M280T259	(M+H)+	Asn-Phe	0.260836	1.31793	0.478027	280.129	259.178						2342.53	4948.69	7997.93	6784.87	2302.44	1765.4	1739.48	3660.65	3310.95	11921.5	5446.28	8374.11	4780.98	4556.68	4538.08
M408T190	[M+H]+	Asn-Phe-Lys	0.545334	0.12793	0.0913955	408.212	189.666			Organic acids and derivatives	Carboxylic acids and derivatives	Amino acids, peptides, and analogues	1659.58	27205.7	6824.52	10223.7	2890.74	2299.04	1005.96	949.524	599.826	2418.28	741.34	822.707	4096.8	4434.24	4434.55
M230T323	(M+H)+	Asn-Pro	0.266446	1.346	0.142212	230.113	323.209						5787.73	5158.63	8123.51	2811.86	4868.1	5863.03	6974.63	6423.6	4203.05	10686.7	6296.15	9312.95	11063.8	10707.8	11065.2
M405T459	[M+H]+	Asp-Asp-Arg	0.18417	1.073	0.823295	405.171	459.228			Organic acids and derivatives	Carboxylic acids and derivatives	Amino acids, peptides, and analogues	1858.68	5584.63	6069.12	3175.29	1845.18	1709.91	1946.71	3880.96	1247	3803.03	5348.33	5494.55	4391.94	4299.78	4300.59
M419T462	[M+H]+	Asp-Glu-Arg	0.324601	1.55604	0.215523	419.188	462.387			Organic acids and derivatives	Carboxylic acids and derivatives	Amino acids, peptides, and analogues	1169.82	6791.39	9201.05	3237.34	1221.45	1001.19	5118.25	5363.81	3544.38	8309.58	5255.58	7609.52	4958.56	4959.1	4880.01
M347T429	[M+H]+	Asp-Gly-Arg	0.304816	1.60357	0.145618	347.167	429.209			Organic acids and derivatives	Carboxylic acids and derivatives	Amino acids, peptides, and analogues	1333.72	4583.98	7561.08	2983.75	1450.9	1089.72	4088.46	4789.57	3399.71	7811.74	4612.68	5770.64	4322.84	4323.21	4365.07
M403T375	[M+H]+	Asp-Ile-Arg	0.48331	1.32189	0.476055	403.229	375.497			Organic acids and derivatives	Carboxylic acids and derivatives	Amino acids, peptides, and analogues	1189.29	30800.5	23868.5	15316.7	4496.18	2898.3	7542.73	24688	12287.1	23135.8	16133.3	20072.9	15427.3	15230.4	15427.8
M437T254	[M+H]+	Asp-Phe-Arg	0.460797	1.9791	0.15654	437.239	254.098			Organic acids and derivatives	Carboxylic acids and derivatives	Amino acids, peptides, and analogues	5186.34	8010.05	12951.8	10524.6	3804.6	3338.75	11156.2	27796.8	4752	6997.66	28361.2	7652.73	9365.26	9370.8	8663.67
M231T380	[M+H]+	Asp-Pro	0.550518	1.36581	0.398584	231.097	380.452	HMDB0002335		Organic acids and derivatives	Carboxylic acids and derivatives	Amino acids, peptides, and analogues	6444.35	14415	39842.4	8041.48	9639.36	7506.44	21890.3	19305.3	7604.73	24883.4	16819.3	26805	16387.7	16385.9	15186.1
M377T269	[M+H]+	Asp-Ser-Arg	0.438928	2.74493	0.0558246	377.181	269.366			Organic acids and derivatives	Carboxylic acids and derivatives	Amino acids, peptides, and analogues	796.203	3402.22	8031.48	1483.29	1043.21	519.485	3871.45	4782.26	3122.14	14184.5	7018.57	8952.4	4436.51	4436.39	4484.36
M295T338	[M+H]+	Aspartame	1.03907	0.900432	0.601164	295.129	337.76		C11045	Organic acids and derivatives	Carboxylic acids and derivatives	"Amino acids, peptides, and analogues"	173419	173182	170333	78096.3	153862	145772	91800.5	77679.5	85342.7	155349	190426	204986	147537	147539	146126
M546T371	[M+Na]+	Aspartate conjugated cholic acid	0.565229	0.545007	0.0128984	546.287	371.121			Lipids and lipid-like molecules	Steroids and steroid derivatives	Bile acids, alcohols and derivatives	21548.2	17609.4	21669.5	6740.68	16608.7	14016.1	11341.3	10407	8411.53	9810.85	4617.45	8927.58	10635.2	10687.9	10693.2
M807T288	[M+Na]+	Astragaloside iii	0.418192	5.82232	0.00226225	807.471	288.18		C08924	Lipids and lipid-like molecules	Steroids and steroid derivatives	Steroidal glycosides	349.89	1442.85	1544.03	379.516	579.086	196.818	3548.01	7789.49	4958.89	5173.33	2744.37	1940.82	2580.44	2496.2	2581.05
M727T398	[M+Na]+	Atazanavir	0.257131	0.658386	0.446618	727.399	398.188	HMDB0015205		Organic acids and derivatives	Carboxylic acids and derivatives	Amino acids, peptides, and analogues	347.17	8414.38	6576.07	4502.94	525.32	458.281	2151.92	2119.89	1577	3821.04	1156.13	2884.34	3122.05	3016.93	3065.73
M253T193	[M+H]+	Azepane-1-carboxylic acid (4-chlorophenyl)amide	0.537633	0.265248	0.024428	253.127	192.841			Benzenoids	Benzene and substituted derivatives	N-phenylureas	9868.01	10097.5	2954.85	17972.1	6903.7	3021.53	1310.32	1341.93	1307.79	2514.05	4627.54	2377.66	5608.29	5697.39	5548.03
M569T382	[M+H-H2O]+	Baccatin iii	0.113502	0.7365	0.185984	569.219	382.325		C11900	Lipids and lipid-like molecules	Prenol lipids	Diterpenoids	1193.18	1954.3	1290.29	658.374	2164.84	1921.86	1071.42	465.187	1279.28	1008.08	1608.88	1330.32	1251.77	1481.77	1483.86
M806T319	[M+Na]+	Beauvericin	0.155899	1.6323	0.104727	806.383	319.276		C11590	Organic acids and derivatives	Peptidomimetics	Depsipeptides	383.128	1472.62	1723.34	616.215	321.172	271.029	1228.98	1253.14	843.339	1645.2	1341.85	1502.16	1460.35	1511.87	1459.98
M167T128	[M+H-C2H3NO]+	Bendiocarb	0.501017	0.631678	0.0389562	167.092	127.771		C14433				19310.8	13816.8	7381.25	18836.7	13328	19475.9	7151.31	16159.7	9867.44	7648.21	9366.38	8015.71	14425.3	14421	14089.4
M382T351_2	[M+H]+	Benthiavalicarb-isopropyl	0.137689	1.09797	0.575585	382.178	350.86		C18415				2395.71	4929.13	4181.54	3570.56	2106.18	2223.95	3199.35	3794.69	2764.92	4636.1	3211.62	3701.78	3366.46	3366.1	3323.19
M464T286	[M+H]+	Benzamide, n-[5-[2-(3,5-dimethoxyphenyl)ethyl]-1h-pyrazol-3-yl]-4-[(3r,5s)-3,5-dimethyl-1-piperazinyl]-, rel-	0.22441	1.662	0.181084	464.247	285.84			Organoheterocyclic compounds	Diazinanes	Piperazines	553.881	3282.35	3298.56	1787.18	916.524	739.08	1736.94	1856.64	1335.62	3929.25	5273.46	3447.98	2663.27	2662.2	2721.04
M250T72	[M+H]+	Benzeneethanamine, 2,5-dimethoxy-4-(trifluoromethyl)-	2.38085	0.0845122	0.132098	250.118	72.434			Benzenoids	Benzene and substituted derivatives	Trifluoromethylbenzenes	5834.03	405522	23669.1	307708	1390.31	39152.6	12112.8	1228.06	12958.1	11788.3	3022.06	25087.1	47823.4	48653.2	47813.2
M180T189	[M+H]+	Benzenemethanol, .alpha.-[(1r)-1-(methylamino)propyl]-, (.alpha.s)-rel-	0.420244	0.564485	0.0666378	180.138	188.581			Organic nitrogen compounds	Organonitrogen compounds	Amines	7215.36	9443.44	6974.46	18196.3	5522.44	7883.16	6615.39	3433.47	5792.83	6303.01	3769.07	5265.63	2933.23	3408.54	3397.68
M288T104	[M+H-C2H4O2]+	Benzenepropanoic acid, 4-[[(3-phenoxyphenyl)methyl]amino]-	1.04179	0.322091	0.237602	288.143	104.455			Benzenoids	Benzene and substituted derivatives	Phenylmethylamines	2435.98	60134.3	10970.8	92612.7	5171.65	4428.12	988.785	18883.9	18470.8	7494.23	5258.14	5512.73	16903.6	19075.3	19087
M510T245	[M+H]+	Benzenesulfonamide, n-(1,1-dimethylethyl)-3-[[5-methyl-2-[[4-(4-methyl-1-piperazinyl)phenyl]amino]-4-pyrimidinyl]amino]-	0.225258	0.7956	0.507141	510.244	245.176			Organoheterocyclic compounds	Diazinanes	Piperazines	2617.1	11271.5	5523.34	5530.16	2693.8	1849.98	3435.99	3574.63	2774.79	4964.94	4171.33	4537.26	4859.17	4855.53	5070.58
M562T345	[M+NH4]+	Benzoic acid, 2-[3-[3-[(5-ethyl-4'-fluoro-2-hydroxy[1,1'-biphenyl]-4-yl)oxy]propoxy]-2-propylphenoxy]-	0.254692	2.00493	0.0217176	562.259	345.343			Benzenoids	Benzene and substituted derivatives	Diphenylethers	539.055	2849.93	2476.59	1809.64	708.303	480.403	2617.24	2542.48	4450.6	3014.81	1985.54	3160.93	1795.02	1793.89	1709.61
M574T438	[M+H]+	Benzoylhypaconine	0.341241	1.54977	0.189197	574.319	438.483			Lipids and lipid-like molecules	Prenol lipids	Diterpenoids	1458.26	6016.32	10706.8	2676.72	1917.39	1542.32	5889.21	6386.44	4446.25	7159.47	5820.35	7985.33	5102.05	5103.5	5179.07
M590T473	[M+H]+	Benzoylmesaconine	0.26514	2.70342	0.000670551	590.276	472.637			Lipids and lipid-like molecules	Prenol lipids	Diterpenoids	476.053	1167.06	1452.32	935.366	385.378	526.694	2346.22	2928.97	1301.05	2191.25	2620.32	1974.83	2452.1	2204.41	2436
M335T229	[M+Na]+	Benzyl butyl phthalate	0.295565	0.574626	0.0770164	335.13	228.769		C14211	Benzenoids	Benzene and substituted derivatives	Benzoic acids and derivatives	4049.22	5347.66	3163.53	8126.32	3434.47	2010.64	2161.98	1895.48	1421.05	2791.3	3678.93	3067.29	2606.05	2441.16	2610.15
M583T211	[M+H]+	Biliverdin	0.197231	0.554634	0.00183409	583.27	211.357	HMDB0001008	C00500	Organoheterocyclic compounds	Tetrapyrroles and derivatives	Bilirubins	1874.43	1731.8	1232.64	2604.56	1695.46	1923.96	908.279	1136.23	717.119	1139.74	1080.48	1153.98	1752.97	1751.1	1836.91
M380T364	[M+H-H]+	Bisphenol ph	0.111675	1.2623	0.234078	380.153	363.596			Phenylpropanoids and polyketides	Diarylheptanoids	Linear diarylheptanoids	1242.8	1896.27	2092.52	1288.15	1060.6	1164.46	1102.86	2133.16	1771.4	2754.56	2004.54	1272.07	844.191	1010.97	854.231
M644T415	[M+H]+	Buprenorphine glucuronide	0.208269	0.710689	0.443255	644.325	414.61			Organic oxygen compounds	Organooxygen compounds	Carbohydrates and carbohydrate conjugates	798.676	6612.02	4516.53	3435.9	726.235	741.52	1791.02	2228.74	1423.02	1967.67	2274.51	2276.56	2836.31	2828.4	3043.15
M288T36	[M+H]+	C17-sphinganine	1.61981	1.23647	0.16559	288.289	36.465			Organic nitrogen compounds	Organonitrogen compounds	Amines	551600	356835	484191	379092	450152	211031	310987	560698	471190	515475	599100	550762	621093	608492	610577
M474T417_2	[M+Na]+	Cabergoline	0.298115	1.5209	0.258325	474.268	416.568	HMDB0014393	C08187	Alkaloids and derivatives	Ergoline and derivatives	Lysergic acids and derivatives	1364.18	6498.66	7095.38	7030.62	1394.69	2982.24	5596.76	4314.88	3686.91	13990.4	5534.33	6976.47	5475.26	5157.49	5154.3
M587T380	[M+Na]+	Canthaxanthin	0.107966	1.01157	0.934237	587.375	379.871	HMDB0003154	C08583	Lipids and lipid-like molecules	Prenol lipids	Tetraterpenoids	2480.56	4261.58	3264.97	3521.25	2652.79	1852.87	2970.61	2441.61	2712.07	3977.09	2870.29	3271.07	2913.44	3135.79	3134.17
M116T503	[M+H-C4H6SO]+	Captopril	0.517566	1.11657	0.611814	116.07	503.087	HMDB0015328	C06867	Organic acids and derivatives	Carboxylic acids and derivatives	Amino acids, peptides, and analogues	68390.2	17971.8	29360.2	30452	50223.5	45510.3	53069	37948.6	37531.8	50430	28469.8	62657.9	55090.8	55062.2	56909.4
M326T222	[M+H]+	Carbamic acid, n-(9h-xanthen-9-ylcarbonyl)-, butyl ester	0.246164	0.42101	0.0947006	326.157	221.535			Organoheterocyclic compounds	Benzopyrans	1-benzopyrans	1076.69	3673.97	1744.79	4651.06	1078.6	610.901	719.314	800.497	907.637	1077	846.031	1053.61	1885.01	1858.52	1885.52
M492T291	[M+H-C5H8O2]+	Cevadine	0.237723	1.72118	0.122746	492.292	290.558			Lipids and lipid-like molecules	Steroids and steroid derivatives	Steroidal alkaloids	287.105	2674.12	4306.36	1388.39	608.157	325.423	2817.32	1927.87	2562.49	3260.75	3190.99	2745.96	2590.34	2678.86	2588.38
M298T35_2	[M+NH4]+	Chaulmoogric acid	0.242863	0.959676	0.798034	298.273	35.162		C08282	Lipids and lipid-like molecules	Fatty Acyls	Fatty acids and conjugates	83204.2	81388.9	177812	108060	148496	84464	87902.6	110411	103735	127868	105230	120720	170752	170761	162808
M355T368_1	[M+H]+	Chlorogenic acid	0.106219	0.627745	0.0590884	355.084	367.738	HMDB0003164	C00852	Organic oxygen compounds	Organooxygen compounds	Alcohols and polyols	436.727	1134.08	768.781	1075.85	675.033	613.22	325.825	533.937	445.741	864.943	429.559	352.71	376.168	372.19	468.9
M426T216	[M+NH4]+	Cholic acid	0.20124	0.373954	0.121838	426.32	215.959	HMDB0000619	C00695	Lipids and lipid-like molecules	Steroids and steroid derivatives	Bile acids, alcohols and derivatives	5236.19	2164.1	2165.2	604.096	761.227	784.343	1101.24	591.609	518.356	759.334	636.271	774.118	1458.41	1423.88	1423.79
M104T373	M+	Choline	0.327504	1.10209	0.613867	104.106	373.32	HMDB0000097	C00114	Organic nitrogen compounds	Organonitrogen compounds	Quaternary ammonium salts	19551.9	20211	12214.1	32449.7	18752.5	17349.5	18930.2	29165	15923.4	32525.1	19333.5	16956.8	19863.8	19252.6	19255.5
M301T45_1	[M+H]+	Chrysoeriol	0.414209	0.47969	0.00164758	301.069	45.454	HMDB0030667	C04293	Phenylpropanoids and polyketides	Flavonoids	O-methylated flavonoids	7584.41	5612.31	4541.41	8793.61	9801.24	7568.41	3134.83	4737.21	2307.14	2607.78	3906.66	4365.45	3694.77	3673.33	4278.2
M307T343	[M+H]+	Cimifugin	0.70085	0.318232	0.230025	307.1	343.445		C09000	Organoheterocyclic compounds	Benzopyrans	1-benzopyrans	3380.07	17847.8	5076.53	48595.2	6532.44	2008.38	1410.77	2402.55	1728.29	5985.97	9081.53	5944.28	10067.2	9896.86	10068.1
M301T184	[M+H]+	Cinnavalininate	0.364635	0.656922	0.0440384	301.045	183.576	HMDB0004078	C05640	Organoheterocyclic compounds	Benzoxazines	Phenoxazines	9114.78	8227.64	9458.3	4289.48	12717.5	11983.5	6466.41	6466.41	7720.17	3064.69	6466.41	6466.41	5772.43	5612.63	5775.63
M148T247	[M+H-C7H6Cl2O]+	Clomeprop	0.172079	0.889653	0.559003	148.075	247.439		C18531	Benzenoids	Benzene and substituted derivatives	Anilides	5770.71	7287.97	6392.5	5259.43	8413.65	3523.61	3238.13	2693.5	4955.05	7014	6810.78	7892.42	5755.75	5759.57	5630.01
M655T411	[M+H]+	Coproporphyrin I	0.167954	1.10878	0.681071	655.276	411.459	HMDB0000643	C05769	Organoheterocyclic compounds	Tetrapyrroles and derivatives	Porphyrins	1076.63	3501.21	2961.68	4091.48	1118.16	1025.42	2437.14	2505	1808.28	2915.25	2871.36	2735.92	1935.73	1755.45	1958.66
M443T388_2	[M+H]+	Cortisol 21-sulfate	0.0922798	1.06807	0.817578	443.183	388.051	HMDB0062779	C02822	Lipids and lipid-like molecules	Steroids and steroid derivatives	Sulfated steroids	1426.27	574.539	3219.66	1317.1	1009.96	1129.09	1324.79	1240.51	1028.59	1524.59	2052.28	2096.45	1220.6	1356.67	1172.27
M290T45	[M+NH4]+	Cotarnine chloride	0.34108	0.96819	0.807801	290.123	44.878						73010.1	84599.6	71235	83831.9	74845.1	62275.7	28655	81583.7	82319.5	75158.1	81040.5	86732.4	88850.9	90454.9	88772
M344T320	[M+NH4]+	Coumaric acid o-glucoside	0.434855	0.284831	0.137186	344.133	320.49			Organic oxygen compounds	Organooxygen compounds	Carbohydrates and carbohydrate conjugates	1352.87	10870.9	2616.15	14030.4	1407.33	1291.65	2011.29	777.603	1228.41	1426.32	2230.94	1317.37	2953.07	3033.88	2952.93
M284T47	[M+H]+	Coumaroyl tyramine	0.848572	1.48707	0.305356	284.127	46.8685			Phenylpropanoids and polyketides	Cinnamic acids and derivatives	Hydroxycinnamic acids and derivatives	19979.1	68073.6	69029.1	41304.3	4097.38	7940.27	23965.2	73461.6	46557.2	88063.6	25406.8	55460.7	56654.9	56652.7	56324.8
M356T157_1	[M+NH4]+	Coumaroylquinic acid	0.383714	0.163861	0.00343729	356.133	156.68			Organic oxygen compounds	Organooxygen compounds	Alcohols and polyols	2315.87	4725.86	646.087	5700.25	3490.43	4510.07	525.491	251.939	578.214	376.113	128.66	1644.34	1318.66	1248.46	1318.29
M114T315	[M+H]+	Creatinine	0.785673	0.93285	0.861808	114.091	314.86	HMDB0000562	C00791	Organic acids and derivatives	Carboxylic acids and derivatives	Amino acids, peptides, and analogues	118934	13230.5	33642.4	17003	68248.3	54544.9	35853.7	86141.5	71210.6	33341.1	37488.1	21047	50462.5	49684	49683.7
M581T269	[M+Na]+	Cucurbitacin b	0.279651	1.89988	0.0281672	581.291	268.647		C08794	Lipids and lipid-like molecules	Steroids and steroid derivatives	Cucurbitacins	913.116	2112.51	4347.45	1400.83	1099.44	884.48	3180.28	3083.07	2932.06	4965.56	2964.72	3312.86	3124.71	2936.37	3122.12
M499T369	[M+H-H2O]+	Cucurbitacin d	0.358621	2.31075	0.00337167	499.298	368.805		C08796	Lipids and lipid-like molecules	Steroids and steroid derivatives	Cucurbitacins	1390.4	2879.8	4118.96	1591.64	1089.91	872.77	5243.01	5622.25	2507.96	4529	4594.03	5102.16	3495.18	3496.99	3002
M537T107	[M+Na]+	Cucurbitacin i	0.882828	0.651514	0.177441	537.302	106.781		C08800	Lipids and lipid-like molecules	Steroids and steroid derivatives	Cucurbitacins	68879.9	39261.3	70568.6	18605.1	48202	87140.9	24500.1	20736.8	18388.1	62382.6	26815.9	63907.8	54068.1	52252	54050.5
M412T123	[M+H]+	Cyclopamine	0.694727	0.302484	0.0696945	412.32	122.789		C10798	Lipids and lipid-like molecules	Steroids and steroid derivatives	Steroidal alkaloids	6336.14	26988.2	13256.2	32060.4	7673.97	1425.93	5771.7	4680.12	2258.69	4546.84	4432.43	4850.42	10584.1	10827.7	10819
M393T507	[M+H]+	Cys-Asp-Arg	0.117069	1.02514	0.428952	393.172	506.652			Organic acids and derivatives	Carboxylic acids and derivatives	Amino acids, peptides, and analogues	6628.05	6848.44	6307.77	6109.05	5850.06	5902.9	6719.53	6568.8	6284.58	6034.69	6426.46	6558.54	6323.97	6105.17	6325.3
M518T435	[M+Na]+	Cysteine conjugated chenodeoxycholic acid	0.328292	1.93313	0.0297361	518.281	435.278			Lipids and lipid-like molecules	Steroids and steroid derivatives	Bile acids, alcohols and derivatives	1209.27	2648.42	5678.89	1587.67	1063.74	1186.94	4778.62	5398.93	3170.18	4917.42	4369.95	3220.41	2790.51	2900.18	2903.05
M487T230	[2M+H]+	Cytidine	0.393864	0.852599	0.416577	487.178	229.935	HMDB0000089	C00475	Nucleosides, nucleotides, and analogues	Pyrimidine nucleosides		44692.1	82591.6	81133.2	60953.4	66569.3	43642.8	89476	44836.5	44177.8	28585	64282.9	52273.6	64611.9	64611.2	63065.1
M386T462	(M+H-H2O)+	Cytidine 5'-diphosphate (CDP)	0.0659549	1.14937	0.117616	386.015	461.762	HMDB0001546	C00112	Nucleosides, nucleotides, and analogues	Pyrimidine nucleotides	Pyrimidine ribonucleotides	1055.81	1168.28	1014.38	745.585	915.856	801.65	1234.35	1127.05	885.166	1027.11	1089.01	1190.56	1107.36	1107.28	1081.12
M489T432	[M+H]+	Cytidine 5'-diphosphocholine	0.252222	1.04698	0.741991	489.114	432.445	HMDB0001413	C00307	Nucleosides, nucleotides, and analogues	Pyrimidine nucleotides	Pyrimidine ribonucleotides	16887.9	9283.97	12597.7	7629.17	12573.7	13380	17128	11146	12393.7	9705.04	12848	12531.1	12529.9	12441.6	12441.4
M500T447	[M+Na]+	Cytochalasin a	0.282412	1.94332	0.00911238	500.258	447.468		C19953	Alkaloids and derivatives	Cytochalasans	Cytochalasins	1001.94	2765.17	3090.9	1820.7	856.887	907.819	3679.64	2749.52	2330.68	3985.81	4328.86	3220.37	3033.78	3054.95	3055.04
M502T416	[M+Na]+	Cytochalasin b	0.296553	1.9715	0.0245188	502.273	415.973		C19954	Alkaloids and derivatives	Cytochalasans	Cytochalasins	1290.42	2960.22	3807.27	2422.88	983.861	996.215	3096.36	4561.81	2858.59	6012.66	2578.68	5458.52	3070.97	3055.23	2760.99
M460T411_1	[M+H-2H2O]+	Cytochalasin e	0.159412	0.950319	0.85101	460.204	411.053						1327.82	3796.69	3991.14	4862.77	2307.5	1034.43	1363.69	2349.62	3337.78	3872.16	2147.35	3389.26	2310.12	2787.7	2322.26
M112T230	[M+H]+	Cytosine	0.51791	0.85464	0.243753	112.05	230.415	HMDB0000630	C00380	Organoheterocyclic compounds	Diazines	Pyrimidines and pyrimidine derivatives	51103.6	82246.4	82758	70934.8	58419.3	53461.3	77838.5	51020.2	48307.3	41950.5	64038.9	57780.3	65906.3	66576.7	65911.3
M631T408	[M+H-H2O]+	Cytotrienin a	0.20248	1.05571	0.903091	631.341	407.506						1237.38	10174.7	3337.24	4855.87	426.224	1110.66	3391.67	2867.92	2405.49	4957.83	5479.58	3217.44	3624.55	3901.28	3624.02
M458T318	[M+H]+	D-amygdalin	0.130816	1.21851	0.42166	458.19	318.012	HMDB0035030	C08325	Organic oxygen compounds	Organooxygen compounds	Carbohydrates and carbohydrate conjugates	695.566	2127.94	1704.93	1902.13	759.711	517.668	1200.27	1576.39	1044.46	2218.46	1551.36	1801.27	1415.05	1412.88	1503.02
M178T213	[M+H-H2O]+	D-glucosaminic acid	0.487994	0.727358	0.0573173	178.049	212.818		C03752	Organic acids and derivatives	Carboxylic acids and derivatives	Amino acids, peptides, and analogues	23456.6	27445.3	20740.3	31282.6	20870.9	14562.6	23615	16747.8	19010.7	12493.2	16149.7	12619.6	25679	25878.6	25878.7
M195T342	[M+H]+	D-Glucuronate	0.18029	1.63424	0.0874471	195.074	342.168		C00191	Organic oxygen compounds	Organooxygen compounds	Carbohydrates and carbohydrate conjugates	3684.45	1751.63	2814.09	992.488	1100.2	574.216	3567.36	1355.82	3695.52	2576.41	3416.81	3229.21	3651.44	3588.3	3589
M130T363_2	[M+H-NH3]+	D-glutamine	1.81053	1.0643	0.544326	130.05	362.676	HMDB0003423	C00064	Organic acids and derivatives	Carboxylic acids and derivatives	Amino acids, peptides, and analogues	1.0022e+06	868629	1.31892e+06	924918	1.30947e+06	1.04383e+06	1.25106e+06	1.38401e+06	1.03085e+06	853281	1.10846e+06	1.25623e+06	1.06473e+06	1.06472e+06	1.06e+06
M498T316	[M+Na]+	D-leucinamide, n-[(phenylmethoxy)carbonyl]-l-leucyl-n-[(1s)-1-formyl-3-methylbutyl]-	0.595082	3.43994	0.000176845	498.302	316.178			Organic acids and derivatives	Carboxylic acids and derivatives	Amino acids, peptides, and analogues	1399.25	3447.24	6887.63	1503.57	1906.98	1439.24	7583.17	10313.7	7304.44	12285.1	10171.8	9389.34	7323.64	7477.33	7321.91
M130T534	(M+H)+	D-Pipecolinic acid	0.564444	0.702906	0.0578819	130.086	533.598						17547.9	42867.9	25773.1	26773.3	32309.5	26354.6	16083	16300.8	15689.8	20883.9	25945	25734.7	24338.6	24141.5	24141.7
M130T389_2	[M+H]+	D-pyroglutamic acid	1.59451	1.2202	0.110356	130.05	388.661		C02237	Organic acids and derivatives	Carboxylic acids and derivatives	Amino acids, peptides, and analogues	337435	246708	284765	157326	256766	306165	329332	331232	243031	288375	397118	350017	293290	295922	293284
M360T356	[M+NH4]+	D-turanose	0.440551	2.26691	0.352315	360.15	356.062	HMDB0011740	C19636	Lipids and lipid-like molecules	Fatty Acyls	Fatty acyl glycosides	2947.81	12516.4	5099.86	11132.2	2414.54	2437.05	524.348	5138.91	16530.4	50170.1	494.18	9992.69	10389.3	10215	10212.2
M617T296	[M+Na]+	Datiscin	0.343518	0.315577	0.00119885	617.125	296.436			Phenylpropanoids and polyketides	Flavonoids	Flavonoid glycosides	2014.63	5501.16	2700.75	4128.57	4549.65	3560.43	636.883	905.417	1002.79	778.514	2275.31	1487.43	4242.53	4213.53	4213.07
M523T286	[M+H-H2O]+	Defluoroatorvastatin	0.328759	2.3031	0.00652661	523.283	286.438			Organoheterocyclic compounds	Pyrroles	Substituted pyrroles	793.29	3225.47	3513.81	1614.45	659.841	418.664	3097.06	5045.77	3084.93	4182.79	3474.02	4665.79	3358.86	3248.04	3357.61
M402T405_1	(M+CH3CN+Na)+	Demethoxycurcumin	0.458536	0.587184	0.42193	402.139	404.82						15324.8	1232.21	2182.37	35395.1	11431	1853.82	4318.57	3793.83	3782.81	11063.2	9583.48	7045.59	9296.52	9222.39	4518.46
M252T143	[M+H]+	Deoxyadenosine	1.03336	0.13483	0.157554	252.108	142.929	HMDB0000101	C00559	Nucleosides, nucleotides, and analogues	Purine nucleosides	Purine 2'-deoxyribonucleosides	2627.75	46308.8	9119.79	82560.4	2304.78	1741.55	1642.32	2000.92	1639.1	6970.06	3181.29	4071.29	15403.1	15388.2	13298.5
M228T199_2	[M+H]+	Deoxycytidine	0.748347	0.163197	0.155483	228.098	199.171	HMDB0000014	C00881	Nucleosides, nucleotides, and analogues	Pyrimidine nucleosides	Pyrimidine 2'-deoxyribonucleosides	1311.66	28316.4	5103.88	41422.6	1717.54	666.383	3439.77	2141.39	863.065	2681.19	1341.36	2350.49	9645.29	9650.8	9940.02
M268T221	[M+H]+	Deoxyguanosine	0.470298	0.667954	0.426379	268.103	221.049	HMDB0000085	C00330	Nucleosides, nucleotides, and analogues	Purine nucleosides	Purine 2'-deoxyribonucleosides	2253.66	27357.3	12123.6	20610.3	2301.85	2087.42	7663.32	8088.54	7404.91	6053.31	7758.57	7606.68	9892.36	10100	9888.2
M330T201	(M+CH3CN+Na)+	Desipramine	0.352104	0.542666	0.257812	330.202	200.625	HMDB0015282	C06943	Organoheterocyclic compounds	Benzazepines	Dibenzazepines	1047.93	12965.8	9317.45	8116.8	1010.87	1629.24	2113.28	2775.23	1959.78	5220.67	2256.17	4173.33	4264.73	4183.92	4201.54
M293T51	[M+H-H2O]+	Desogestrel	16.3536	0.03358	0.118175	293.211	51.444	HMDB0014449	C07629	Lipids and lipid-like molecules	Steroids and steroid derivatives	Estrane steroids	34254.3	1.34247e+07	2.6296e+06	1.71091e+07	46299.6	48855.6	162742	91451.2	72645.2	475194	120973	194964	3.15831e+06	3.15832e+06	3.16868e+06
M179T49_2	[M+H-2H2O]+	Dethiobiotin	2.48868	0.100829	0.119522	179.142	49.374	HMDB0003581	C01909	Lipids and lipid-like molecules	Fatty Acyls	Fatty acids and conjugates	9924.47	378566	66627.8	366242	11040.7	8702.33	8019.31	9953.88	9060.97	24328	14257.3	19188.3	77452.5	76611	76613
M595T141	[M+H-H2O]+	Di-.gamma.-linolenin (6c,9c,12c)	0.405534	0.773499	0.0517697	595.471	141.093			Lipids and lipid-like molecules	Fatty Acyls	Lineolic acids and derivatives	21440	19302.1	15928.8	14284.1	14166.2	23096.1	10858.5	13192.4	17573.2	14054.9	12120.4	15906.6	18097.8	18075.9	21825.6
M238T198	[M+H]+	Dicrotophos	0.174313	0.998744	0.995908	238.082	198.037		C18656	Organic acids and derivatives	Organic phosphoric acids and derivatives	Phosphate esters	4970.38	1098.34	3416.87	1584.62	3606.9	5657.85	2399.34	3551.14	2562.66	3471.74	3631.5	4693.06	4351.68	4212.52	4350.23
M107T326	[M+H]+	Diethylene glycol	0.376585	1.74343	0.114656	107.059	325.973		C14689	Organic oxygen compounds	Organooxygen compounds	Ethers	2293.48	1914.67	2186.94	1968.01	4671.05	8711.81	7218.81	8987.5	9713.46	4018.91	4629.99	3343.97	4314.63	4314.62	4336.41
M787T337	[M+Na]+	Digitoxin	0.300613	1.53834	0.192464	787.446	337.103	HMDB0015468	C06955	Lipids and lipid-like molecules	Steroids and steroid derivatives	Steroid lactones	1048.83	7008.99	6894.73	3474.71	788.366	1023.28	5853.35	5345.68	6863.7	5213.47	3235.48	4622.58	5138.75	4880	4887.19
M673T449	[M+Na]+	Digoxigenin bisdigitoxoside	0.248358	1.67201	0.0795726	673.361	449.148			Lipids and lipid-like molecules	Steroids and steroid derivatives	Steroid lactones	1188.82	1933.72	4552.36	2056.34	1003.78	823.005	4315.9	3787.34	2273.9	2200.65	3668.1	3079.23	2975.8	2975.68	3029.18
M559T446	[M+Na]+	Dihydrocelastryl diacetate	0.134663	1.11891	0.706679	559.291	445.524						1200.37	3717.55	3730.11	2278.89	1431.22	1123.67	2754.52	708.146	1835.55	4206.42	2567.7	3012.59	2611.83	2511.07	2612.07
M613T30	[M+H]+	Dilinolenin (9c,12c,15c)	1.22652	1.1011	0.489718	613.482	30.4755			Lipids and lipid-like molecules	Fatty Acyls	Lineolic acids and derivatives	184500	110802	107371	142541	176657	220199	177042	210154	201036	134256	174568	140262	151969	151325	150885
M142T384	[M+H]+	Dimetridazole	0.22743	0.512377	0.0215187	142.049	384.25			Organoheterocyclic compounds	Azoles	Imidazoles	1777.78	3529.93	1820.73	3249.17	1444.6	1412.36	979.77	1219.14	909.53	969.879	1125.57	1577.21	1674.94	1735.59	1702.74
M529T328	[2M+H]+	Dinor-12-oxophytodienoic acid	0.412662	1.93216	0.0502413	529.345	328.202			Lipids and lipid-like molecules	Fatty Acyls	Eicosanoids	1128.57	7850.8	8998.87	3824.75	2237.21	1538.17	8832.28	7132.77	8356.6	11685.4	3492.95	9921.64	5041.75	5051.28	3876.85
M391T34	[M+H]+	Dioctyl phthalate	0.195934	0.866299	0.236758	391.262	34.1835		C14227	Benzenoids	Benzene and substituted derivatives	Benzoic acids and derivatives	13406.4	12947	15860.6	11874.8	15926.4	9943.49	10377.2	12070.1	10554.9	7659.82	13908.7	14697.3	10812.3	9683.24	9636.82
M869T419	[M+H]+	Dioscin	0.345204	4.29729	0.00239613	869.472	419.432		C08897	Lipids and lipid-like molecules	Steroids and steroid derivatives	Steroidal glycosides	188.262	1685.93	1189.1	1474.13	126.44	49.6065	3091.39	5148.59	1348.21	4368.43	3919.02	2379.46	2701.94	2833.47	2738.54
M453T219	[M+H]+	Diphenoxylate	0.294317	0.406226	0.192154	453.241	219.5	HMDB0015213	C07872	Benzenoids	Benzene and substituted derivatives	Diphenylacetonitriles	722.994	4766.5	9429.21	3218.58	1061.07	730.805	1050.82	943.424	733.147	2209.53	1267.47	1891.35	2738.39	2703.11	2738.42
M858T333	[M+Na]+	Dirithromycin	0.208626	2.21552	0.0157941	857.524	333.278			Organic oxygen compounds	Organooxygen compounds	Carbohydrates and carbohydrate conjugates	393.344	1272.58	1420.1	710.296	649.356	489.58	1021.43	1344.25	1594.12	2872.77	2568.07	1533.52	1640.2	1405.19	1405.59
M133T367_1	[M+H]+	DL-asparagine	0.99124	1.45061	0.319215	133.06	367.111	HMDB0000168	C00152	Organic acids and derivatives	Carboxylic acids and derivatives	Amino acids, peptides, and analogues	26217.8	66740.5	56086.1	67307.7	46453.1	27574.3	35239.3	37225.4	19191.8	99893.6	142447	87229.6	59118.5	59094.8	62191.7
M223T448	[M+H]+	Dl-cystathionine	0.811771	1.53909	0.296352	223.074	447.99	HMDB0000455	C00542	Organic acids and derivatives	Carboxylic acids and derivatives	Amino acids, peptides, and analogues	9747.41	79326	75502.8	26391.3	17104.2	10244.8	71050.3	20941.1	43927.9	41501.1	105491	53096.8	40755.3	41267.1	42257.9
M148T389_2	[M+H]+	DL-Glutamic acid	1.87135	1.21203	0.148225	148.06	388.551	HMDB0060475	C00025	Organic acids and derivatives	Carboxylic acids and derivatives	Amino acids, peptides, and analogues	519084	447951	471765	226066	366210	482046	536112	514052	368192	452502	623936	551187	471305	475524	475538
M188T286	(M+H-H2O)+	DL-Indole-3-lactic acid	0.800376	0.802116	0.383939	188.07	286.437						76615.2	64899.5	75312.6	52943.3	111054	33529.4	38362.7	32054	26219.4	79499.3	72709.7	83515.2	64373.1	64367	63238.3
M166T413	(M+H)+	DL-Methionine sulfoxide	0.258832	0.843055	0.319632	166.053	413.142	HMDB0002005	C02989	Organic acids and derivatives	Carboxylic acids and derivatives	"Amino acids, peptides, and analogues"	8543.19	9754.43	9658.99	6957.47	9864.22	7251.3	4350.65	6669.4	3821.46	8103.92	10059.1	10859.3	9959.07	9953.59	10208.5
M136T289_2	[M+H-H2O]+	Dl-octopamine	1.34788	0.836001	0.548365	136.075	289.02		C04227	Benzenoids	Phenols	1-hydroxy-2-unsubstituted benzenoids	201678	99710.3	117257	108655	252775	137767	99528	59872.6	39822.5	152998	251029	164067	138478	138523	137564
M166T247_2	[M+H]+	DL-phenylalanine	5.6113	0.694843	0.207316	166.087	247.268		C02057	Organic acids and derivatives	Carboxylic acids and derivatives	Amino acids, peptides, and analogues	1.84461e+06	2.53406e+06	2.75728e+06	2.25147e+06	3.33823e+06	1.04715e+06	1.00054e+06	732249	425790	2.19272e+06	2.38925e+06	2.82937e+06	2.02918e+06	2.0605e+06	2.02913e+06
M231T242	[2M+H]+	DL-proline	0.421679	0.491195	0.125774	231.145	241.884	HMDB0000162	C00148	Organic acids and derivatives	Carboxylic acids and derivatives	Amino acids, peptides, and analogues	9331.81	15296.8	3744.94	10376.2	3673.86	5094.63	2186.76	1979.6	1829.15	1274.3	5148.97	10922	3522.81	3411.73	3526.91
M134T60	[M+H]+	Dl-threonine methyl ester	0.348219	0.850058	0.487066	134.08	60.235			Organic acids and derivatives	Carboxylic acids and derivatives	Amino acids, peptides, and analogues	12572.2	14048.7	18456.4	26623.8	22696	13634.1	8737.6	11508.2	7218.85	21520.1	24793.4	18054.7	23285.4	23774.5	23277.4
M229T289	[M]+	Dl-tmap	0.808621	0.646614	0.0902836	229.154	289.484			Organic acids and derivatives	Carboxylic acids and derivatives	Amino acids, peptides, and analogues	53975.1	58818.8	36940.8	64362.6	45067.5	78559.5	22017.9	31183.9	22508.2	79110.5	29579.9	33976.8	40696.2	39795	39788.7
M657T347	[M+Na]+	Echinocystic acid 3-glucoside	0.295281	2.10511	0.0336367	657.402	346.601			Lipids and lipid-like molecules	Prenol lipids	Terpene glycosides	614.822	2522.57	3945.85	1479.42	888.013	1215.8	2870.8	4554.37	2220.73	6097.26	4288.08	2422.86	2504.24	2503.19	2631.38
M765T253	[M+Na]+	Eleutheroside e	0.167549	0.656935	0.303848	765.257	252.854		C20786				1061.01	1493.42	1119.62	3940.88	3547.01	1609.57	459.397	835.905	514.44	3208.04	1873.1	1499.16	2262.1	2107	2261.74
M275T50	[M+H]+	Empenthrin	18.0047	0.0272934	0.117759	275.2	50.103		C18524	Lipids and lipid-like molecules	Prenol lipids	Monoterpenoids	26181.6	1.69276e+07	2.96986e+06	2.01752e+07	27284.4	24616.7	63282.9	61410.9	41855.4	517980	171006	240317	3.96203e+06	3.96203e+06	3.9447e+06
M682T282_2	[M+H]+	Enniatin a	0.12607	1.79208	0.0538743	682.461	281.891			Organic acids and derivatives	Peptidomimetics	Depsipeptides	796.492	118.401	270.544	604.386	795.011	856.025	727.792	1672.14	635.767	1309.2	1074.59	746.809	606.241	606.515	543.736
M321T318	[M+H]+	Enoxacin	0.304931	0.455205	0.0669151	321.116	318.131	HMDB0014610	C06979	Organoheterocyclic compounds	Diazanaphthalenes	Naphthyridines	1491.98	6133	2347.36	7056.52	3644.77	1614.99	1536.09	1580.09	1357.03	2491.68	1730.38	1450.63	2744.38	2743.11	2860.79
M605T377	[2M+H]+	Enterodiol	0.261047	1.91938	0.0404212	605.324	376.7	HMDB0005056	C18166	Lignans, neolignans and related compounds	Dibenzylbutane lignans	Dibenzylbutanediol lignans	645.419	2853.93	2998.51	1542.2	748.568	822.53	3277.28	4573.39	2136.06	3399.33	3558.56	1502.86	2605.09	2596.89	2585.96
M425T319	[M+H]+	Eprosartan	0.388106	0.292165	0.00051584	425.142	318.662	HMDB0015014	C07467	Benzenoids	Benzene and substituted derivatives	Benzoic acids and derivatives	4843.04	3041.96	3855.67	2735.92	5616.74	6568.49	1333.57	1859.84	1230.69	1302.68	1017.89	1044.98	3284.74	3208.79	3285.14
M548T144	[M+H]+	Ergosine	0.50476	0.136952	0.0641088	548.264	144.326		C09167	Alkaloids and derivatives	Ergoline and derivatives	Lysergic acids and derivatives	13630	958.642	559.189	1025.26	6804.49	12280.4	899.954	934.573	450.336	932.569	631.573	979.639	4257.39	4055.14	4255.22
M582T245_1	[M+H]+	Ergotamine	0.12078	1.13759	0.435806	582.273	245.138	HMDB0014834	C07544	Alkaloids and derivatives	Ergoline and derivatives	Lysergic acids and derivatives	3196.26	3227.69	4358.09	5162.08	6287.74	2841.25	4618.99	5443.59	2786.51	4484.34	5810.34	5379.23	4785.63	4774.74	5427.95
M338T33_2	[M+H]+	Erucamide	1.4255	0.983938	0.959278	338.341	33.193			Lipids and lipid-like molecules	Fatty Acyls	Fatty amides	188730	87627.3	151991	65904.1	121510	397931	143217	178183	237894	146373	167906	123838	181389	181350	178490
M209T287	[M+H-NH3]+	Escaline	0.505462	0.259691	0.00187889	209.117	287.269			Benzenoids	Benzene and substituted derivatives	Methoxybenzenes	4673.65	10110.7	4687.43	11093.4	7006.68	4504.28	916.393	1275.33	1331.43	2126.39	2584.69	2692.56	4986.9	4841.84	4849.14
M143T317	[M+H-C11H7ClN4O2]+	Eszopiclone n-oxide	0.346239	1.47667	0.0709956	143.081	317.159			Organoheterocyclic compounds	Pyrrolopyrazines	Cyclopyrrolones	7458.8	8113.1	5025.33	5178.68	3632.42	6470.71	8899.85	12608.4	10960.3	9993.73	5386.25	5132.98	6608.19	6654.61	7300.23
M102T341	[M+H-C6H4Cl2O]+	Ethanol, 2-[[3-(2,3-dichlorophenoxy)propyl]amino]-	0.370489	0.796157	0.094825	102.09	340.914			Benzenoids	Benzene and substituted derivatives	Halobenzenes	17937.8	10265.4	10708.7	14572.5	14023.4	16632	13780.1	12127.1	12921.7	8149.92	10965.6	9044.03	12098.6	11847.2	11853.8
M301T338	[M+H]+	Ethanone, 1-[1-(4-fluorophenyl)-2,5-dimethyl-1h-pyrrol-3-yl]-2-(1-pyrrolidinyl)-	0.0890425	1.03809	0.806549	301.146	338.365			Organoheterocyclic compounds	Pyrroles	Substituted pyrroles	6074.83	4200.77	4348.13	4482.24	4524.46	3936.36	5096.37	3368.66	3569.23	7595.97	4388.16	4598.45	5288.38	5126.24	5287.83
M437T44	[M+H-2H2O]+	Ethynylestradiol 17-.beta.-d-glucuronide	0.131253	1.04982	0.749608	437.19	43.6			Lipids and lipid-like molecules	Steroids and steroid derivatives	Steroidal glycosides	6304.9	4754.88	4874.24	3799.72	5067.73	4449.41	3919.81	5623.71	2561.29	6332.77	6920.35	5350.21	11904.5	11759.8	11902.1
M325T63	[M+H]+	Etonogestrel	4.79892	0.0332524	0.111083	325.2	62.992	HMDB0014439		Lipids and lipid-like molecules	Steroids and steroid derivatives	Estrane steroids	8868.41	1.78143e+06	408903	1.00628e+06	5636.04	2736.08	6118.01	6266.4	6581.01	50786.5	11688.4	25428	606351	627330	606381
M275T400	[M+H]+	Famotidine acid methyl ester	0.137942	0.731254	0.331175	275.053	400.005			Organoheterocyclic compounds	Azoles	Thiazoles	886.555	1696.2	425.056	2342.27	777.286	693.382	794.558	768.853	772.959	892.757	823.643	934.926	741.66	715.616	715.063
M639T197	[2M+H]+	Fenamifos sulfoxide	0.40576	0.393941	0.0359956	639.222	197.327			Benzenoids	Benzene and substituted derivatives	Phenyl sulfoxides	1068.57	9097.96	4410.05	11931.9	7387.85	4422.41	2353.22	2464.59	1763.72	3426.89	2765.16	2321.75	4575.6	4210.71	4550.78
M671T361	[2M+H]+	Fenamiphos sulfone	0.173246	0.191842	0.000292601	671.184	360.533			Benzenoids	Benzene and substituted derivatives	Benzenesulfonyl compounds	706.846	1123.11	391.24	837.707	750.456	548.687	46.7332	61.997	153.915	217.869	96.4632	259.08	390.792	390.407	408.65
M233T460	[M+H-C7H12O2]+	Fenofibrate	0.199895	0.770109	0.427228	233.014	460.097	HMDB0015173	C07586	Benzenoids	Benzene and substituted derivatives	Benzophenones	3662.55	3332.69	4161.9	5055.15	3137.39	11424.4	3136.98	3245.31	4059.93	3103.58	6888.02	3265.57	4157.01	3964.25	2766.96
M274T61	[M+H]+	Fenpropidin	1.73971	1.1512	0.56525	274.274	61.172		C18726	Benzenoids	Benzene and substituted derivatives	Phenylpropanes	298978	721044	895650	617912	1.012e+06	89595.1	493936	817479	624154	732268	661363	855611	1.37068e+06	1.37058e+06	1.32678e+06
M165T147	[M+H]+	Fenuron	0.330056	1.55835	0.125879	165.101	146.815		C11224				5760.91	7215.08	8306.92	494.192	6338.53	6333.73	4472.82	10873.1	5377.97	14528	7513.41	10918.6	6275.13	6279.2	6735.47
M654T431	[M+H]+	Ferrioxamine	0.113275	1.14951	0.510023	654.272	431.199						887.452	2420.81	2130.2	1442.83	754.788	870.618	1324.53	1732.18	2076.63	1663.1	1564.73	1417.36	1275.18	1432.36	1430.52
M314T45	[M+H]+	Feruloyl tyramine	0.840011	1.84347	0.266669	314.138	45.4805	HMDB0029365	C02717	Benzenoids	Phenols	Methoxyphenols	11900.6	28451.4	52204.6	30042.5	5290.47	6417.84	13891.1	25809.7	16190.5	107896	38145.4	45659.8	38374.6	38375.8	36562.5
M502T314	[M+H]+	Fexofenadine	0.24377	0.569252	0.351413	502.297	314.165	HMDB0005030	C06999	Benzenoids	Benzene and substituted derivatives	Diphenylmethanes	325.808	8052.07	4918.05	3455.04	558.177	350.319	1417.32	1522.1	1145.6	2375.84	1626.32	1965.49	2586.42	2671.54	2586.95
M287T206	[M+H]+	Fisetin	0.134637	1.05122	0.853612	287.066	206.063		C10041	Phenylpropanoids and polyketides	Flavonoids	Flavones	1389.48	2667.83	2811.7	4019.09	2234.38	2891.9	2132.39	880.206	1475.12	4861.31	3682.27	3803.35	2954.73	2844.6	2955.75
M786T391	(M+H)+	Flavin adenine dinucleotide (FAD)	0.153945	0.918256	0.560575	786.164	390.574	HMDB0001248	C00016	Organic oxygen compounds	Organooxygen compounds	Carbohydrates and carbohydrate conjugates	4275.97	3048.89	3668.56	2191.36	3472.04	5147.23	4211.57	3879.73	2686.17	2607.05	3578.77	3058.43	3591.8	3703.38	3591.27
M653T368	[M+H]+	Flavone base + 3o, 1meo, o-hexa-hexa	0.276934	0.446893	0.00151071	653.134	368.24			Phenylpropanoids and polyketides	Flavonoids	Flavonoid glycosides	2577.27	3036.32	2324.48	4797.48	3324.4	2442.21	1673.29	1375.99	963.482	1668.46	1487.27	1100	2380.02	2380.82	2448.69
M683T366	[M+H]+	Flavone base + 3o, 2meo, o-hexa-hexa	0.872717	0.30618	0.00123907	683.146	366.022	HMDB0037460		Phenylpropanoids and polyketides	Flavonoids	Flavonoid glycosides	23572.5	21585.2	11557.1	37438	22638	19440.2	5957.74	5880.74	4361.93	10220.3	8597.12	6693.36	13842.4	14165.3	13837.9
M322T68	(M+CH3COO+2H)+	Flumequine	0.696608	1.25133	0.555286	322.11	68.495	HMDB0041895		Organoheterocyclic compounds	Quinolines and derivatives	Quinoline carboxylic acids	42631.3	3617.14	14477.4	664.518	29239.5	60588.5	26059.5	50941.3	28111.3	27414.3	31587.3	25110.5	29760.5	29940.9	29768.1
M474T401	[M+H]+	Folinic acid	0.179799	1.6096	0.0365515	474.171	400.65	HMDB0001562/HMDB0062757	C03479	Organic acids and derivatives	Carboxylic acids and derivatives	Amino acids, peptides, and analogues	1234.19	2477.44	1081.04	1400.22	1345.87	494.975	1941.58	2232.06	1402.16	2940.61	1978.73	2435.98	679.5	733.761	735.542
M615T468	[M+Na]+	Fortunellin	0.165917	0.527795	0.00961977	615.174	468.079			Phenylpropanoids and polyketides	Flavonoids	Flavonoid glycosides	1480.85	1193.09	958.602	1231.56	2050.07	1141.74	497.517	396.254	463.434	1099.1	984.581	810.983	1153.26	1151.42	1194.7
M728T398	[M+Na]+	Fumonisin b2	0.208621	0.838302	0.749456	728.397	398.159	HMDB0034703	C19242	Organic acids and derivatives	Carboxylic acids and derivatives	Fumonisins	475.482	5719.8	6613.55	1681.72	474.018	339.69	2117.15	1935.39	515.359	4080.47	2295.68	1885.54	2347.83	2364.71	2644.85
M146T346	[M+H]+	G-guanidinobutyrate	0.60388	0.791253	0.10927	146.092	346.067	HMDB0003464	C01035	Organic acids and derivatives	Carboxylic acids and derivatives	Amino acids, peptides, and analogues	50756.7	41106.2	37411.8	49078.9	37885.9	57880.9	25836.4	37238.5	29055.6	40397.3	29979.7	54391.2	42016.4	41765.9	42016.6
M172T35	[M+H]+	Gabapentin	0.643075	0.864544	0.474663	172.132	34.524	HMDB0005015	C07018	Organic acids and derivatives	Carboxylic acids and derivatives	Amino acids, peptides, and analogues	99634.4	44824.6	54253.4	42864	90602.8	72026.6	39077.8	80088.7	47077	76897.8	41434.3	64878.3	54486	54312.3	54245.9
M154T344	[M+H]+	Gabapentin related compound a	0.586207	0.760712	0.3026	154.133	344.167						35708.7	16481.6	20354.6	11962.8	21531.4	47216.5	18738.7	18092.9	22764.6	16349	24882.4	15756	23095.3	23094.8	22875.3
M276T421	[M+H]+	Gamma-glu-glu	0.483306	1.0404	0.815123	276.119	421.01	HMDB0011738		Organic acids and derivatives	Carboxylic acids and derivatives	Amino acids, peptides, and analogues	51967.6	47667.5	55664.5	19482.3	49916	55263	56687	64820.2	32181.9	31881.7	51697.3	54003.7	45569.4	45676.5	45569.3
M247T263_2	[M+H]+	Gamma-glutamylvaline	0.637246	1.37319	0.00770028	247.176	263.022	HMDB0011172		Organic acids and derivatives	Carboxylic acids and derivatives	Amino acids, peptides, and analogues	20163.5	20558.5	30811.2	16382.1	26827.2	30176.4	30745.2	32617.7	32152.6	36732.4	29936.7	36816.1	32885.1	33118	32884.9
M277T453	[M+H]+	Gamma-l-glutamyl-l-glutamic acid	0.289127	0.779779	0.0981428	277.103	452.654	HMDB0011737	C05282	Organic acids and derivatives	Carboxylic acids and derivatives	Amino acids, peptides, and analogues	10328.6	11835	13136.8	6718.33	8657.41	9575.57	10273.1	9664.98	5389.92	6216.94	7972.79	7465.24	9508.69	9302.61	9300.18
M247T371	[M+H]+	gamma-L-Glutamyl-L-valine	0.562399	1.13759	0.678598	247.128	370.502			Organic acids and derivatives	Carboxylic acids and derivatives	"Amino acids, peptides, and analogues"	13785.9	33084.3	55008.5	27860.9	13709	10027.2	19998.8	21016.2	17345.4	34639.3	41192.9	40400	31875.4	31541.5	31874.5
M647T464	[M+H]+	Garcinolic acid	0.179505	1.62253	0.119007	647.324	463.864			Organoheterocyclic compounds	Benzopyrans	1-benzopyrans	956.184	2333.76	1863.85	1860.58	1093.22	850.725	710.594	3003.96	1917.12	4215.03	2747.88	1940.59	2205.66	2208.43	2086.07
M359T305	[M+H]+	Gardenin b	0.130573	0.890458	0.715708	359.123	305.373		C15109	Phenylpropanoids and polyketides	Flavonoids	O-methylated flavonoids	1805.88	1599.26	1271.12	549.777	2749.3	1162.33	909.731	476.372	543.842	2258.04	2027.44	1921.28	1557.82	1524.35	1557.06
M549T392	(2M+Na)+	Gemcitabine	0.187966	0.454254	0.0522175	549.134	391.671						817.983	3133.37	1184.29	1973.77	1002.67	894.589	664.72	874.055	751.948	493.415	660.119	647.067	1415.56	1416.87	1375.71
M803T414	[M+Na]+	Gitoxin	0.14597	0.933092	0.881952	803.426	413.959		C08866	Lipids and lipid-like molecules	Steroids and steroid derivatives	Steroid lactones	729.864	4688.56	4224.63	405.074	629.629	618.461	1746.37	2050.58	1268.97	2102.41	1789.13	1582.95	2203.06	2201.93	2316.38
M303T434	[M+H]+	Gln-arg	0.400693	1.5067	0.162537	303.177	433.551	HMDB0028791		Organic acids and derivatives	Carboxylic acids and derivatives	Amino acids, peptides, and analogues	2340.69	13378.7	10679	8774.35	2299.46	1995.76	8590.22	11090.5	7284.83	12735.5	8570.78	11194.7	7853.46	7209.72	7845.73
M275T391	[M+H]+	Gln-gln	0.149713	0.880849	0.448495	275.124	390.571			Organic acids and derivatives	Carboxylic acids and derivatives	Amino acids, peptides, and analogues	3913.48	2188.45	2297.71	1695.53	3341.47	3125.2	2780.46	2869.51	2817	1335.67	2201.5	2584.34	2974.4	2793.27	2975.14
M416T357	[M+H]+	Gln-Leu-Arg	0.379353	2.00676	0.0367377	416.261	356.532			Organic acids and derivatives	Carboxylic acids and derivatives	Amino acids, peptides, and analogues	963.057	5693.2	7035.7	2097.14	1145.65	917.716	5787.18	7668.37	6233.28	6305.62	3369.24	6461.85	4737.22	4523.37	4734.82
M294T389	[M+H]+	Gln-phe	0.0712492	1.17047	0.110274	294.129	388.661	HMDB0028804		Organic acids and derivatives	Carboxylic acids and derivatives	Amino acids, peptides, and analogues	887.836	760.266	958.789	848.04	1001.81	898.51	786.451	1189.12	883.445	1022.36	1066.8	1320.01	1173.61	1172.57	1191.9
M375T432_2	[M+H]+	Glu-Ala-Arg	0.512645	2.42	0.00110946	375.198	431.733			Organic acids and derivatives	Carboxylic acids and derivatives	Amino acids, peptides, and analogues	2470.92	6173.98	6328.46	4451.23	1560.15	1680.51	10064.3	9835.81	6068.11	11048.2	7498.66	10334.9	6134.61	6133.89	6210.35
M217T411	[M+2H]2+	Glu-Glu-Arg	0.337086	1.76815	0.131631	217.081	410.966			Organic acids and derivatives	Carboxylic acids and derivatives	Amino acids, peptides, and analogues	3969.37	5088.49	6407.48	3086.83	2841.64	1156.81	3754.64	3309.3	3718.56	12716.9	9945.88	6427.51	6469.42	5973.21	5874.59
M405T469	[M+H]+	Glu-Glu-Lys	0.260472	1.60561	0.104132	405.198	468.736			Organic acids and derivatives	Carboxylic acids and derivatives	Amino acids, peptides, and analogues	1000.29	3571.95	4718.84	2489.57	653.318	910.537	4230.41	4106.92	3777.19	2423.1	4191.19	2697.22	2386.72	2431.23	2386.16
M334T453	[M+H]+	Glu-Gly-Glu	0.243714	0.622296	0.0304586	334.124	453.425			Organic acids and derivatives	Carboxylic acids and derivatives	Amino acids, peptides, and analogues	3427.13	5829.42	3864.66	4097.56	2826.16	2207.73	1675.54	3279.08	2100.55	2148.39	2116.91	2527.26	3109.67	3077.48	3086.97
M333T450	[M+H]+	Glu-Gly-Lys	0.363006	2.63262	0.00442003	333.177	449.562			Organic acids and derivatives	Carboxylic acids and derivatives	Amino acids, peptides, and analogues	982.057	3966.31	2783.1	1376.09	882.142	937.542	7499.72	5000.82	3421.22	5205.65	4287.93	3351.9	3391.9	3677.26	3624.84
M285T176	[M+H]+	Glu-His	0.247957	0.58159	0.327341	285.123	176.48	HMDB0028821		Organic acids and derivatives	Carboxylic acids and derivatives	Amino acids, peptides, and analogues	10540.7	811.384	2526.51	1984.29	1930.22	4336.45	2526.51	2526.51	237.788	2526.51	2526.51	2526.51	669.54	590.706	593.793
M261T351	[M+H]+	Glu-Ile	0.992411	1.26794	0.590856	261.144	351.006	HMDB0028822		Organic acids and derivatives	Carboxylic acids and derivatives	Amino acids, peptides, and analogues	16581.8	87167.6	133345	59410.8	18565.6	10730.5	34056.8	36984.7	42485.1	115851	56868	126853	73539.2	73490	73108.5
M417T389	[M+H]+	Glu-Ile-Arg	0.647262	1.37629	0.454437	417.245	389.299			Organic acids and derivatives	Carboxylic acids and derivatives	Amino acids, peptides, and analogues	3656.66	37426.8	44124.5	19328.2	4784.85	1603.25	12943	26876.7	12791.2	41704.9	22975.1	35372.8	25061.3	24746.4	25061.4
M245T398	[M+H]+	Glu-Pro	0.254021	0.397258	0.128935	245.089	397.908	HMDB0028827		Organic acids and derivatives	Carboxylic acids and derivatives	Amino acids, peptides, and analogues	890.136	6291.24	7355.25	4034.8	9470.58	287.492	4684.19	489.456	393.63	701.127	4467.73	517.983	3142.71	1357.57	1545.7
M401T435	[M+H]+	Glu-Pro-Arg	0.221776	1.37681	0.375343	401.214	435.442			Organic acids and derivatives	Carboxylic acids and derivatives	Amino acids, peptides, and analogues	1179	9947.39	4326.52	3111.56	1340.12	1447.25	5999.89	5068.31	3833.28	6062.85	5038.29	3394.88	3862.8	3979.85	3861.77
M235T422	[M+H]+	Glu-Ser	0.380993	0.845134	0.42763	235.092	421.677	HMDB0028828		Organic acids and derivatives	Carboxylic acids and derivatives	Amino acids, peptides, and analogues	20116.1	24755.7	26754.6	9729.99	19409.3	13728.6	11347.2	12018.9	10359.5	17085.6	21082.6	24869.3	19946.6	20943.9	20971.8
M249T406	[M+H]+	Glu-Thr	0.276023	1.18723	0.384508	249.108	405.896	HMDB0028829		Organic acids and derivatives	Carboxylic acids and derivatives	Amino acids, peptides, and analogues	10641	8695.67	18369	4240.48	11164.6	10557	10567.3	8586.22	15903.9	15190.3	13194.9	12146.1	11420.8	11437.9	11837.4
M203T362	[M+2H]2+	Glu-Thr-Arg	0.197312	1.08723	0.672744	203.113	361.937			Organic acids and derivatives	Carboxylic acids and derivatives	Amino acids, peptides, and analogues	10918.1	4069.34	4925.77	3597.41	6572.61	5803.17	5158.93	6126.15	5094.23	7606.39	6909.32	8121.84	6374.78	6419.62	6419.13
M334T337	[M+H]+	Glu-Trp	0.334352	1.17754	0.450544	334.14	337.312	HMDB0028830		Organic acids and derivatives	Carboxylic acids and derivatives	Amino acids, peptides, and analogues	11726.3	12522.5	13513.3	9289.82	11938.3	8141.55	7864.71	8979.04	6928.01	16959.3	18771.3	19548.3	12635.2	12835.3	12635.9
M490T467	[M+H]+	Glu-Trp-Arg	0.284896	1.6367	0.114238	490.226	467.147			Organic acids and derivatives	Carboxylic acids and derivatives	Amino acids, peptides, and analogues	1312.35	5415.62	5611.23	2297.76	1556.4	684.684	4366.95	5339.95	2900.95	6184.56	3223.93	5607.91	4152.86	4152.25	4366.15
M394T325	[M+H]+	Glu-Val-Phe	0.261499	1.4573	0.25772	394.197	325.009			Organic acids and derivatives	Carboxylic acids and derivatives	Amino acids, peptides, and analogues	1067.92	5495.07	6396.14	3200.22	1117.68	1005.93	3643.56	4698.17	2821.04	7114.76	3553.67	4812.53	3642.08	3736.64	3642.53
M635T487	(M+Na)+	Glutathione disulfide	0.137821	1.30755	0.21043	635.14	487.164	HMDB0003337	C00127	Organic acids and derivatives	Carboxylic acids and derivatives	"Amino acids, peptides, and analogues"	1491.78	1690.08	1331.86	1441.09	689.162	2166.97	2900.77	2352.22	1989	983.622	1839.34	1455.81	1798.92	1780.68	1798.95
M232T434	[M+H]+	Gly-Arg	0.602308	1.24579	0.589701	232.14	434.418			Organic acids and derivatives	Carboxylic acids and derivatives	Amino acids, peptides, and analogues	8754.17	51650.4	37427.2	32358.3	7778.88	3286.03	18536.5	43106.3	11627.1	48580.2	14857.5	39266.8	25119.4	25116.4	20375.7
M191T413_2	[M+H]+	Gly-Asp	0.191793	0.629192	0.176233	191.066	412.803			Organic acids and derivatives	Carboxylic acids and derivatives	Amino acids, peptides, and analogues	3354.04	2476.59	802.154	1135.45	2585.97	3244.72	385.285	1722.9	2525.58	725.076	773.039	2424.45	1828.26	1769.87	2030.64
M187T364	(M+H-H2O)+	Gly-Glu	0.159688	0.935073	0.871411	187.071	363.723						1422.15	8165.24	8344.28	934.681	7920.68	738.627	4871.62	7218.5	5856.35	2828.14	2844.94	2118.94	3124.2	3336.94	4079.21
M204T448	[M+H]+	Gly-Lys	0.242362	1.22017	0.133553	204.134	447.664			Organic acids and derivatives	Carboxylic acids and derivatives	Amino acids, peptides, and analogues	8093.62	11607.8	7824.08	8572.31	6305.43	6382.28	8209.73	12363.4	7446.08	10062.4	11418.3	10026.7	6642.97	6469.04	6471.76
M190T245	[M+2H]2+	Gly-Phe-Arg	0.499219	0.357405	0.00309524	190.107	244.68			Organic acids and derivatives	Carboxylic acids and derivatives	Amino acids, peptides, and analogues	6075.37	8616.55	5122.34	10350.9	7754.81	11543.3	1230.79	1215.05	325.225	4358.71	4863.23	5685.43	6619.18	6465.11	6466.94
M302T460	[M+H]+	Gly-Pro-Glu	0.372865	1.76807	0.00329811	302.145	459.62			Organic acids and derivatives	Carboxylic acids and derivatives	Amino acids, peptides, and analogues	4749.73	5887.94	2408.2	3535.33	3586.67	4242.76	5801.86	5801.48	5755.54	7803.88	9103.2	8893.64	5008.61	4999.33	5691.05
M163T356	[M+H]+	Gly-Ser	0.239195	1.60356	0.237052	163.059	356.356			Organic acids and derivatives	Carboxylic acids and derivatives	Amino acids, peptides, and analogues	4917.52	3888.36	3474.12	3618.19	4162.24	330.945	4957.08	4426.58	3047.13	12798.6	3385.64	4083.69	3881.48	3880.54	4105.37
M262T262	[M+H]+	Gly-Trp	0.335215	1.88681	0.113001	262.118	262.443			Organic acids and derivatives	Carboxylic acids and derivatives	Amino acids, peptides, and analogues	735.832	4408.31	6844.64	3052.4	810.786	1003.46	3228.24	4291.67	2557.54	8208.21	5070.25	8446.98	3678.24	3681.3	3471.93
M345T424	(2M+H)+	Glycerol 3-phosphate	1.77842	0.866884	0.359855	345.036	423.509	HMDB0000126	C00093	Lipids and lipid-like molecules	Glycerophospholipids	Glycerophosphates	584296	308939	428964	216016	421863	458143	378396	280276	333330	308607	417576	378131	376496	374722	374722
M104T257_2	[M+H-C3H7O5P]+	Glycerophosphocholine	8.03135	0.712027	0.160966	104.107	257.298	HMDB0000086	C00670	Lipids and lipid-like molecules	Glycerophospholipids	Glycerophosphocholines	2.86155e+06	6.49531e+06	4.07285e+06	7.61774e+06	2.77122e+06	3.10297e+06	3.3084e+06	3.253e+06	2.75231e+06	3.482e+06	3.34131e+06	3.0319e+06	4.29094e+06	4.26533e+06	4.26521e+06
M488T405	[M+Na]+	Glycocholate	0.178656	0.835923	0.345082	488.307	405.09	HMDB0000138	C01921	Lipids and lipid-like molecules	Steroids and steroid derivatives	Bile acids, alcohols and derivatives	3942.47	6594.59	6683.18	5633.75	4279.77	2840.21	4191.3	2251.49	3610.42	5574.59	3742.57	5685.57	4506.86	4615.68	4506.72
M152T221	[M+H]+	Guanine	0.851891	0.208744	0.121548	152.056	220.51	HMDB0000132	C00242	Organoheterocyclic compounds	Imidazopyrimidines	Purines and purine derivatives	2983.09	39004.5	11581.1	50904.7	3327.94	2907.09	4279.97	4562.13	3131.04	4121.32	3677.31	3337.9	12258	12687.5	12262.4
M306T268_1	(M+Na)+	Guanosine	0.292799	1.25752	0.318305	306.08	268.186	HMDB0000133	C00387	Nucleosides, nucleotides, and analogues	Purine nucleosides		3551.31	11525.3	8818.97	10145.4	5033.52	2820.22	9013.7	9575.68	6839.52	6780.06	8197.74	12276.7	8996.25	8427.1	9003.76
M364T425	(M+H)+	Guanosine 5'-monophosphate (GMP)	0.220958	1.3804	0.140168	364.065	425.405	HMDB0001397	C00144	Lipids and lipid-like molecules	Fatty Acyls	Eicosanoids	5127.15	1750.58	5731.71	3601.19	5052.62	3131.05	7221	3712.26	7195.18	2974.3	6118.82	6452.43	4634.77	4217.75	4673.62
M213T201_1	[M+H]+	Harmine	0.229979	0.552114	0.0717315	213.123	201.346	HMDB0030311	C06538	Alkaloids and derivatives	Harmala alkaloids		2040.16	5657.12	4338.15	2795.85	2091.26	1777.44	1759.23	1780.24	1583.3	2820.11	657.297	1724.33	1990.54	2033.12	1988.73
M307T27	[M+H]+	Heptanedioic acid, 1-[2-[(2-carboxyphenyl)methylene]hydrazide]	0.383511	4.27219	0.0143245	307.143	26.549			Benzenoids	Benzene and substituted derivatives	Benzoic acids and derivatives	3197.44	309.859	468.309	432.381	758.51	1542.66	3209.95	8005.84	5471.79	8031.56	2053.74	1889.9	2371.13	2426.28	2370.58
M627T462	[M+H]+	Herbacetin-3,8-diglucopyranoside	0.0175482	0.989674	0.916213	627.173	461.767			Phenylpropanoids and polyketides	Flavonoids	Flavonoid glycosides	782.639	794.062	879.097	819.691	759.099	658.197	650.583	825.057	701.651	1093.74	704.959	668.344	704.583	740.544	704.397
M340T120	[M+H]+	Hexetidine	0.296334	0.303375	0.000899133	340.392	119.549						2259.3	3647.97	1820.67	3811.11	2990.28	1578.37	1342.08	893.484	746.203	644.649	706.074	554.178	2035.34	1880.53	1880.38
M185T47	[M+H]+	Hexyl tiglate	0.581495	2.7234	0.0547036	185.153	46.754			Lipids and lipid-like molecules	Fatty Acyls	Fatty acid esters	691.102	4032.75	14729	3375.34	1995.98	1002.78	6890.6	5895.77	5385.53	17432.8	14509	20223.4	5819.22	5823.88	6228.15
M312T286_2	[M+H]+	His-Arg	0.163517	1.11249	0.611574	312.154	286.012			Organic acids and derivatives	Carboxylic acids and derivatives	Amino acids, peptides, and analogues	2421.84	6604.59	3746.94	4602.15	2361.59	2165.21	3788.42	4252.46	3129.47	5193.9	3251.5	4750.41	3958.26	3798.31	3955.2
M288T374	(M+NH4)+	His-Asp	0.144251	1.28174	0.492319	288.13	374.374						976.571	2141.22	3145.68	3919.92	1727.87	1660.76	3542.37	849.8	1179.76	2533.91	6118.83	3171.09	2462.24	2544.39	2456.03
M302T370	(M+NH4)+	His-Glu	0.28226	1.37733	0.0837095	302.146	369.835						3846.5	5548.3	4427.17	3778.83	5857.21	5608.96	8994.29	9125.37	6737.28	3734.12	6395.46	5048.14	5362.73	5226.92	5226.23
M269T346	(M+H)+	His-Ile	0.145067	1.52133	0.0116427	269.16	346.253						1078.22	947.381	582.784	1250.07	941.478	1209.93	1474.36	1573.06	1428.18	2161.93	1227.99	1277.46	1584.08	1542.23	1538.59
M269T287	[M+H]+	His-Leu	0.654357	1.84363	0.0830522	269.16	287.193		C05010	Organic acids and derivatives	Carboxylic acids and derivatives	Amino acids, peptides, and analogues	1382.56	18940.7	16250.1	22484.3	3070.22	1707.93	15401.2	16296.6	15808	31653	19358.8	19172.1	13921	13460	13466.9
M303T269	[M+H]+	His-Phe	0.354755	2.01239	0.0218299	303.145	268.817			Organic acids and derivatives	Carboxylic acids and derivatives	Amino acids, peptides, and analogues	2216.24	3409.71	4185.47	5240.7	1672.12	1688.45	3129.82	5282.15	6749.73	10083.9	4708.46	7099.57	3760.03	3548.45	3765.46
M253T333	[M+H]+	His-Pro	0.361068	2.30898	0.0114339	253.129	333.278			Organic acids and derivatives	Carboxylic acids and derivatives	Amino acids, peptides, and analogues	1427.08	2348.56	3158.52	2541.23	2109.61	1740.47	3778.21	4132.49	2360.32	8735.85	6040.59	5720.7	3723.13	3666.08	3666.48
M257T338	[M+H]+	His-Thr	0.392611	1.97386	0.00669762	257.124	337.738			Organic acids and derivatives	Carboxylic acids and derivatives	Amino acids, peptides, and analogues	2515.8	5208.85	4800.44	4349.05	1874.8	1834.47	4904.13	6519.54	5193.97	9904.06	6292.86	7814.21	5980.01	6287.13	6284.6
M319T250	[M+H]+	His-Tyr	0.321418	0.551958	0.107556	319.099	250.333	HMDB0014620	C06906	Organoheterocyclic compounds	Benzothiazines	Phenothiazines	4856.9	5856.93	3102	9221.01	4356.45	1611.78	726.113	1799.63	1594.97	3491.2	4417.41	3980.25	4735.04	4630.57	4636.08
M156T371	[M+H]+	Histidine	3.58176	1.44668	0.1167	156.077	371.278	HMDB0000177	C00135	Organic acids and derivatives	Carboxylic acids and derivatives	Amino acids, peptides, and analogues	618021	363680	402363	516038	528316	997910	1.0838e+06	721652	1.20641e+06	611772	869620	463538	626458	626401	584446
M546T444	[M+H]+	Homoharringtonine	0.225282	2.31668	8.609e-05	546.262	443.716	HMDB0000112	C00334				707.984	1286.56	710.961	829.266	588.036	645.623	2147.08	2028.4	1302.78	2077.15	1692.09	1799.44	1315.67	1322.22	1207.32
M513T375	[2M+H]+	Huperzine b	0.464393	2.5855	0.00501438	513.313	374.735		C09866				1939.09	5911.66	4293.24	3060.33	1688.95	1353.09	6761.2	10157.5	3597.91	11571.5	7320.31	7767.47	4821.86	4824.59	4497.03
M495T346_1	[M+H]+	Hydramethylnon	0.173882	1.64609	0.0422995	495.195	345.963		C10994	Benzenoids	Benzene and substituted derivatives	Trifluoromethylbenzenes	596.819	2074.09	1089.59	1492.91	634.65	571.237	1722.56	1824.09	1030.96	1869.7	2269.47	1915.8	1485.43	1563.4	1466.48
M130T248	[M+H-C2H6O3]+	Hydrastinine	0.247999	0.835273	0.548755	130.064	247.778						9039.29	6279.46	7441.66	5752.14	9904.42	3344.49	3490.97	3841.01	1690.44	6959.6	12622.9	6277.34	6091.04	5969.24	5969.53
M559T321	[M+Na]+	Hyperforin	0.230975	1.39741	0.365836	559.355	320.809		C07608	Lipids and lipid-like molecules	Prenol lipids	Monoterpenoids	658.536	6713.65	4010.48	3390.78	719.21	765.421	2873.47	6167.26	3380.22	4456.84	2824.12	3017.33	2800.66	2794.07	2939.63
M501T364	[M+Na]+	Ikarugamycin	0.267913	1.99174	0.0402925	501.277	364.158						513.718	3944.71	2688.03	1952.22	319.522	284.559	2885.53	4236.64	2145.84	3400.7	3009.39	3647.29	2235.68	2068.26	2068.47
M203T226	[M+H]+	Ile-Ala	0.501257	0.757583	0.53598	203.139	225.713			Organic acids and derivatives	Carboxylic acids and derivatives	Amino acids, peptides, and analogues	5449.86	28309	20564	25853.7	3253.18	3782.83	6208.1	6685.46	5054.34	22769.9	10937	14416	15021.6	14511.8	15024.5
M287T227	(M+CH3CN+H)+	Ile-Asn	0.0449851	0.911337	0.377047	287.172	227.019						786.973	714.853	905.896	727.523	810.459	1021.47	707.569	803.108	531.075	840.344	664.689	979.985	537.959	609.502	578.171
M247T348	(M+H)+	Ile-Asp	0.327905	1.25683	0.606372	247.128	347.949						1869.56	18215.9	10592.5	7757.36	1528.96	1632.02	4726.87	6945.63	5068.54	17284.6	7443.96	10809.7	6844.97	6773.97	6844.96
M243T215	(M+H-H2O)+	Ile-Glu	0.185509	0.804691	0.354189	243.133	215.254						2998.81	5540.19	6536.91	3500.75	2708.41	2413.26	2778.92	2417.65	2203.59	4158.12	2928.77	4582.77	3520.12	3520.12	3546.22
M575T420_2	(2M+K)+	Ile-His	0.256929	1.50729	0.155116	575.269	420.333						1317.01	5418.98	4643.22	3235.03	1457.6	1310.14	3760.57	3546.7	2354	5894.23	6199.22	4444.93	4226.21	4377.39	4377.03
M260T344	(M+H)+	Ile-Lys	0.73492	2.38954	0.00789394	260.196	343.577						2894.53	10543.4	16896	11783.8	2987.31	2892.55	15647.9	20510.5	11524.2	28564.6	18750.1	19694.8	14203.1	13976.6	13977.4
M263T269	[M+H]+	Ile-Met	0.217665	1.09791	0.636775	263.146	269.351			Organic acids and derivatives	Carboxylic acids and derivatives	Amino acids, peptides, and analogues	31754.1	65202.2	30435.8	22546.6	38762.6	29443.3	34878.4	35176.1	39485.2	58626.3	31417.2	39919	39015.9	39104.9	42967.1
M233T229	[M+H]+	Ile-Thr	0.736831	1.68148	0.23205	233.149	228.617			Organic acids and derivatives	Carboxylic acids and derivatives	Amino acids, peptides, and analogues	3821.67	34175.8	34464.6	24008.3	3523.43	2856.52	16498.4	21329	11769	51326.2	25614.5	46404	25891.9	25887.9	26497.9
M318T177	[M+H]+	Ile-Trp	0.469567	1.33173	0.506388	318.181	176.506			Organic acids and derivatives	Carboxylic acids and derivatives	Amino acids, peptides, and analogues	493.959	21505.8	21465.2	14132.1	2516.81	680.349	8123.15	11063.3	8356.82	24582.3	11793.8	17042.3	11620.7	11505.3	11640.9
M446T355	[M+H]+	Ile-Trp-Lys	0.50435	3.32046	0.0367905	446.271	355.032			Organic acids and derivatives	Carboxylic acids and derivatives	Amino acids, peptides, and analogues	1516.29	4407.46	6403.7	2555.34	1580.84	870.808	5421.4	19829.1	4359.02	6512.95	15639.4	5796.55	4887.85	4768.85	4775.9
M336T198	(M+CH3CN+H)+	Ile-Tyr	0.4446	1.61264	0.311089	336.191	198.081						588.968	15873.6	16420.2	6581.99	882.982	740.549	5754.01	9298.54	5864.44	21942.9	10939.9	12460.9	8516.04	8681.48	8517.08
M130T71	[M+H-H2O]+	Indole-3-carbinol	0.809795	0.769107	0.136577	130.064	71.222	HMDB0005785		Organoheterocyclic compounds	Indoles and derivatives	Indoles	66231.6	66603.2	61843.3	76478.6	81258.6	48609.7	29201.7	39735.3	31453.1	76393.4	66420.1	65227.4	78824.2	74414	83303.8
M221T235	(M+NH4)+	Indole-3-pyruvic acid	0.200997	1.18183	0.632957	221.092	234.785	HMDB0060484	C00331	Organoheterocyclic compounds	Indoles and derivatives	Indolyl carboxylic acids and derivatives	6032.69	3160.32	4121.86	2180.14	3647.17	1887.41	2069.41	2547.73	1253.77	8411.1	4076.94	6494.54	3819.17	3756.43	3757.89
M176T267	[M+H]+	Indoleacetic acid	0.326259	1.75258	0.113677	176.065	267.142	HMDB0000197	C00954	Organoheterocyclic compounds	Indoles and derivatives	Indolyl carboxylic acids and derivatives	3179.94	948.866	1307.6	762.023	4140.4	8787.96	5415.73	6536.81	7284.38	4313.64	3468.55	6502.03	4522.89	4524.96	4730.06
M170T248	(M+H-H2O)+	Indoleacrylic acid	0.351937	0.729375	0.255668	170.059	248.461	HMDB0000734		Organoheterocyclic compounds	Indoles and derivatives	Indoles	10350.9	9461.15	11082	9599.09	15730	4393.7	5554.12	3405.03	2153.81	10360.1	10613.5	12125.7	8723.03	8421.35	8710.39
M349T438	[M+H]+	Inosine 5'-monophosphate	0.353514	1.5841	0.00482915	349.054	437.967	HMDB0000175	C00130	Nucleosides, nucleotides, and analogues	Purine nucleotides	Purine ribonucleotides	4425.59	4556.88	6130.92	2440.69	3225.6	6511.54	7319.45	8244.73	7469.99	5666.67	6938.31	7592.83	6253.62	6427.74	6255.52
M283T467	[M+H-CH4S]+	Isomalathion	0.229594	1.09724	0.539566	283.018	466.697			Lipids and lipid-like molecules	Fatty Acyls	Fatty acid esters	13513	6744.52	8078.05	6281.89	6924.92	12208.1	9123.89	10801.8	8895.64	8115.76	11194.4	10845.9	13069.5	15266.8	15242.1
M249T251	[M+H-C4H9N]+	Isoquinoline, 5-[[(2s)-hexahydro-2-methyl-1h-1,4-diazepin-1-yl]sulfonyl]-4-methyl-	0.225945	0.802443	0.511759	249.061	250.981						2935.16	4502.61	1806.16	4974.96	7938.39	5388.11	2152.91	1006.47	1506.25	6427.75	6603.31	4406.92	3052.66	2455.78	3049.4
M180T287	[M+H]+	Isoxanthopterin	0.283004	0.750176	0.478969	180.051	287.057	HMDB0000704	C03975	Organoheterocyclic compounds	Pteridines and derivatives	Pterins and derivatives	7529.96	2740.92	3043.34	16173.9	2477.76	6364.29	6280.89	4977.34	5167.47	4403.94	4469.26	3455.51	3770.11	3814.89	1952.11
M621T312	[M+Na]+	Jacaglabroside b	0.0304913	1.00001	0.999925	621.158	312.265						668.355	1129.91	737.828	797.09	885.082	842.152	941.941	746.42	702.934	931.787	786.928	950.453	798.015	740.432	739.515
M175T460	[M+H]+	Juglone	0.244965	0.818573	0.223381	175.023	460.408	HMDB0030773	C03840	Benzenoids	Naphthalenes	Naphthoquinones	7752.46	5212.58	5606.63	6529.25	10238.6	10009.1	6648.18	7599.06	4286.95	4988.71	7767.01	5831.29	6450.67	6528.96	6596.41
M559T454	[2M+H]+	Karbutilate	0.146416	1.07948	0.815271	559.307	454.188		C18433	Benzenoids	Benzene and substituted derivatives	N-phenylureas	933.053	3898.17	3739.29	2119.31	1305.02	872.749	2391.17	3678.43	1977.43	3217.22	628.753	1997.24	2343.54	2118.5	2340.71
M380T281	[M+H]+	Kasugamycin	0.311899	1.832	0.005473	380.182	280.75		C17968	Organic oxygen compounds	Organooxygen compounds	Carbohydrates and carbohydrate conjugates	2721.14	2246.21	3542.62	1602.39	2823.75	2766.63	3145.27	6534.52	3187.29	5541.62	4906.8	5451.94	3546.49	3670.77	3289.45
M314T327	[M+H]+	Kresoxim-methyl	0.252179	0.443016	0.0366822	314.144	326.871		C11017				1542.29	2923.5	1800.7	5143.19	5155.81	1823.13	674.125	1273.97	1138.85	1592.91	1837.02	1629.57	2388.98	2379.79	2388.95
M531T356	[M+H]+	Kukoamine b	0.256066	1.76277	0.051615	531.326	356.317	HMDB0060525		Benzenoids	Phenols	Benzenediols	1060.1	4710.35	2090.13	2799.92	1176.13	1081.09	2135.09	4718.03	2729.87	4501.91	3857.22	4828.84	1970.59	1692.36	1651.03
M209T250	[M+H]+	Kynurenine	0.624397	0.72628	0.442895	209.091	250.318	HMDB0000684	C01718	Organic oxygen compounds	Organooxygen compounds	Carbonyl compounds	43337.6	17057	16445.5	13846.7	24378.8	18866.8	5500.06	1853.58	2413.11	21763.4	38595.8	27146.6	19512	19508.5	18793.1
M203T252_2	[M+H]+	L-alanyl-l-norleucine	0.364059	1.30124	0.453134	203.138	252.307			Organic acids and derivatives	Carboxylic acids and derivatives	Amino acids, peptides, and analogues	2847.28	12287.8	14773.9	9297.67	2713.9	1575.81	6233.15	6981.45	5827.54	15905.9	9973.47	11677.7	10895.3	10983.8	13019.1
M149T30	[M+H]+	L-Arabinono-1,4-lactone	0.595924	0.730758	0.0283943	149.022	29.799		C01114				32004.2	33941.3	33727.9	46992.4	34915.8	25446.4	20462.4	24678	25125.2	23459.2	35798.2	21764.5	30044.9	30049.3	28859.9
M175T547	(M+H)+	L-Arginine	1.32635	1.07964	0.911574	175.12	546.631	HMDB0000517	C00062	Organic acids and derivatives	Carboxylic acids and derivatives	"Amino acids, peptides, and analogues"	159704	131310	141888	100956	754284	59265.5	131932	113686	155807	20900.1	800325	232061	167994	169918	183036
M315T408	[M+H-NH3]+	L-arginine-7-amido-4-methylcoumarin	0.136376	0.911256	0.676706	315.13	407.506			Organic acids and derivatives	Carboxylic acids and derivatives	Amino acids, peptides, and analogues	5805.64	2557.26	3220.38	1553.93	2185.99	3567.04	2670.81	2812.65	1954.02	3452.29	2810.1	3513.99	2583.64	2583.69	2401.63
M133T429	(M+H)+	L-Asparagine	0.325929	1.1151	0.772679	133.06	428.621	HMDB0000168	C00152				11924.1	7378.2	6338.68	6257.41	14085.4	5749.13	4243.83	4288.56	4692.35	10297	10736.5	23429.1	7156.76	7345.93	7431.71
M281T338	[M+H]+	L-Aspartyl-L-phenylalanine	0.344346	1.79267	0.0672543	281.113	337.813	HMDB0000706		Organic acids and derivatives	Carboxylic acids and derivatives	Amino acids, peptides, and analogues	1696.93	4789.04	6543.84	4724.67	1806.04	1957.78	4090.19	5262.5	4679.82	11337.6	5453.87	7751.17	5008.92	5107.59	5023.81
M162T341_4	[M+H]+	L-carnitine	6.43231	0.909983	0.560574	162.113	340.914	HMDB0062496	C00318	Organic nitrogen compounds	Organonitrogen compounds	Quaternary ammonium salts	6.33568e+06	3.40714e+06	3.68771e+06	3.02696e+06	4.77306e+06	6.46835e+06	5.18536e+06	4.33357e+06	4.68574e+06	2.9284e+06	4.29984e+06	3.77261e+06	4.31696e+06	4.31691e+06	4.25589e+06
M170T358	[M+H]+	L-Cysteic acid	0.331993	0.392276	0.247577	170.011	357.596	HMDB0002757	C00506	Organic acids and derivatives	Carboxylic acids and derivatives	Amino acids, peptides, and analogues	8147.53	335.814	925.938	214.198	2004.54	9733.91	1872.38	2725.11	1259.21	1068.02	819.214	635.835	1604.42	1588.37	1604.49
M427T470	[M+H]+	L-cysteine-glutathione disulfide	0.16058	1.08862	0.638638	427.094	469.957			Organic acids and derivatives	Carboxylic acids and derivatives	Amino acids, peptides, and analogues	11950.9	15819.4	10389.5	10261.3	9166.58	17032.2	17864.1	11228.2	10680.9	9789.69	20639.4	11030.4	14188.6	14033.5	14188.5
M295T389	(2M+H)+	L-Glutamate	0.385831	1.45369	0.0896221	295.113	388.646	HMDB0000148	C00025	Organic acids and derivatives	Carboxylic acids and derivatives	"Amino acids, peptides, and analogues"	10363	10601.6	10176.9	4316.34	6921.27	8603.67	11151	10796.7	6040.22	12719.2	19332.7	14073.1	11490.7	11653.6	11653.4
M144T399	[M+H-CH4O]+	L-glutamic acid, dimethyl ester	0.452256	0.575635	0.0828997	144.065	399.39			Organic acids and derivatives	Carboxylic acids and derivatives	Amino acids, peptides, and analogues	12812.5	18020.5	14855.4	7165.54	6034.54	26077.3	9870.85	8594.52	5970.7	8515.76	10170.5	5786.88	9990.61	10009.5	10676.3
M156T478	(M+H)+	L-Histidine	0.980784	1.29633	0.0660753	156.076	477.966	HMDB0000177	C00135	Organic acids and derivatives	Carboxylic acids and derivatives	"Amino acids, peptides, and analogues"	80619.9	72367.3	73651.1	39133.9	85386.4	78215.3	100508	91158.3	124750	67786.1	86840.2	85567.4	88544.2	86070	88485.3
M144T312	[M+H-CH3ON]+	L-homoarginine	0.185198	0.619488	0.0117254	144.101	311.925	HMDB0000670	C01924	Organic acids and derivatives	Carboxylic acids and derivatives	Amino acids, peptides, and analogues	1622.43	2206.19	1579.83	2587.41	1408.24	1876.05	1007.13	747.343	818.311	1418.83	1373.54	1622.76	1575.89	1575.85	1523.33
M180T187	[M+H]+	L-homophenylalanine	0.334279	0.623049	0.00304436	180.087	187.075		C17235	Organic acids and derivatives	Carboxylic acids and derivatives	Amino acids, peptides, and analogues	7619.13	8466.28	6762.8	4605.58	8981	7319.73	4284.6	3677.97	5543.12	5335.35	3693.25	4726.92	4147.87	3435.64	3587.53
M150T274	[M+H]+	L-methionine	0.553128	1.18924	0.761693	150.057	274.478	HMDB0000696	C00073	Organic acids and derivatives	Carboxylic acids and derivatives	Amino acids, peptides, and analogues	3441.63	42301.4	26857.3	13508.6	3243.57	2890.92	3986.64	3584.88	3388.04	29592.2	32641	36507.1	2828.78	2683.19	2697.57
M263T253	(2M+H)+	L-Norleucine	0.422461	1.53441	0.263153	263.196	253.482	HMDB0001645	C01933	Organic acids and derivatives	Carboxylic acids and derivatives	"Amino acids, peptides, and analogues"	3963.33	4869.69	17518.2	4382.68	10285.3	946.588	9707.09	8050.82	3845.44	10957.8	13680	18151.5	7204.95	7110.2	7110.17
M147T462	(M+NH4)+	L-Pipecolic acid	0.286904	1.23313	0.413706	147.112	462.397	HMDB0000070/HMDB0000716	C00408	Organic acids and derivatives	Carboxylic acids and derivatives	"Amino acids, peptides, and analogues"	15511	10281.8	14616.9	7792.66	12918.8	14078.8	11849	12772.9	11694.3	14922.6	31192.3	10300.5	12012.5	11980.2	10822.6
M116T353	(M+H)+	L-Proline	0.453841	0.878146	0.707545	116.07	352.918	HMDB0000162	C00148	Organic acids and derivatives	Carboxylic acids and derivatives	"Amino acids, peptides, and analogues"	22401.2	17644.4	24073	20735.2	20852.7	67111.6	18115.2	17794.8	35552	16516.5	19264.4	44516.5	23552.5	21165.3	27643.8
M218T269	[M+H]+	L-propionylcarnitine	0.899159	1.12246	0.608733	218.138	268.721	HMDB0062514		Lipids and lipid-like molecules	Fatty Acyls	Fatty acid esters	122171	59226.6	83784.2	66699.8	138563	84269	79204.3	67782.1	68502.7	95334.4	165960	145859	101317	100677	101317
M147T398	(M+NH4)+	L-Pyroglutamic acid	0.948269	0.74475	0.196957	147.075	398.05	HMDB0000267/HMDB0000805/HMDB0060262	C01879	Organic acids and derivatives	Carboxylic acids and derivatives	"Amino acids, peptides, and analogues"	93890.8	69910.2	89072.6	84051.2	123372	102922	94568.9	110179	97261.2	71078.4	19902.6	26466.7	90357.6	95009.5	90365.6
M277T441	[M+H]+	L-saccharopine	0.520124	0.371826	0.020766	277.139	440.658	HMDB0062698	C00449	Organic acids and derivatives	Carboxylic acids and derivatives	Amino acids, peptides, and analogues	7446.31	20326.3	4862.83	8225.08	8637.51	10579.9	2516.19	2743.6	1909.57	4215.67	6144.3	4809.2	6905.42	6957.53	6957.51
M106T423	(M+H)+	L-Serine	0.175369	0.790811	0.479003	106.049	423.243	HMDB0000187/HMDB0062263	C00065	Organic acids and derivatives	Carboxylic acids and derivatives	"Amino acids, peptides, and analogues"	5339.42	4420.35	4661.49	3494.08	14083.7	3443.94	4569.8	4124.74	3814.59	5385.84	4985.99	5147.78	4411.2	4665.34	4669.26
M120T345_2	[M+H]+	L-threonine	0.708397	0.908007	0.533897	120.065	344.773	HMDB0004041	C05519	Organic acids and derivatives	Carboxylic acids and derivatives	Amino acids, peptides, and analogues	118848	140033	152549	101783	115959	148849	101240	82629.9	75960.3	112378	171951	162290	128496	127938	127937
M205T316	(M+H)+	L-Tryptophan	0.448316	0.284818	0.0371471	205.1	315.507	HMDB0000929	C00078	Organoheterocyclic compounds	Indoles and derivatives	Indolyl carboxylic acids and derivatives	2550.53	8859.25	5795.98	13566.2	3513.6	2451.33	1905.06	1273.11	846.213	2832.77	2626.5	979.671	3409.78	3186.1	3185.68
M181T102	[M+H]+	L-tyrosinamide	0.236249	1.15934	0.461391	181.097	101.85			Organic acids and derivatives	Carboxylic acids and derivatives	Amino acids, peptides, and analogues	6905.74	3311	12319.5	17545.6	9463.49	11412	9880.72	9370.54	13208	12173.2	13546.8	12491	8902.42	8883.37	9535.39
M182T432	(M+H)+	L-Tyrosine	0.743417	1.02035	0.967415	182.081	432.135	HMDB0000158	C00082				50819.6	30845.2	45586.5	65775.6	18538.6	104805	59719.3	161011	38700.1	12242.7	21999.8	29135.5	56375.3	56367.7	54626.5
M118T371	(M+H)+	L-Valine	0.520006	0.434404	0.00052633	118.085	371.46	HMDB0000883	C00183	Organic acids and derivatives	Carboxylic acids and derivatives	"Amino acids, peptides, and analogues"	11210.2	8309.65	6997.36	7126.57	10830.2	13447.4	4523.67	3518.34	3879.46	4495.62	5180.6	3563.54	8709.56	7496.85	7478.43
M412T146	[M+H]+	Lasiocarpine	0.263006	1.26668	0.53662	412.222	146.109		C10341				2504.06	4192.64	11240.3	2369.2	2950.33	884.48	2520.89	5614.6	3907.66	7868.83	5522.79	5144.01	4029.17	4085.08	4085.91
M203T46	[M+H]+	Leu-Ala	0.75064	0.40591	0.100741	203.139	46.153			Organic acids and derivatives	Carboxylic acids and derivatives	Amino acids, peptides, and analogues	10195.5	31962.7	15115.7	44286.8	14609	2243.76	5016.88	8922.26	4788.09	6731.89	8035.63	14570.4	9187	10767.2	10794.2
M288T324	(M+H)+	Leu-Arg	1.22894	2.17357	0.123462	288.203	324.411						3585.41	25415	100976	26695.2	6298.06	4666.14	41485.4	51359	28591	106049	48569.7	88312.5	45989.8	44365.3	45991.7
M444T332	[M+H]+	Leu-Arg-Arg	0.575196	4.35034	0.0390529	444.292	331.96			Organic acids and derivatives	Carboxylic acids and derivatives	Amino acids, peptides, and analogues	1070.66	4347.91	5751.4	2788.51	1300.22	861.642	5905.17	21904	5686.32	24776.6	5810.43	6046.48	11073.4	11121.6	8798.11
M375T315_3	[M+H]+	Leu-Asp-Lys	0.254446	1.40886	0.145726	375.239	315.243			Organic acids and derivatives	Carboxylic acids and derivatives	Amino acids, peptides, and analogues	2120.42	5401.52	5609.9	4108.73	1927.66	1475.91	4329.19	4319.77	3960.85	6938.28	3978.98	5557.59	4491.95	4480.44	4480.43
M302T228	(M+CH3CN+H)+	Leu-Glu	0.558659	3.49348	0.0582117	302.171	228.222						1231.1	7892.99	3028.54	7478	1446.59	924.867	2134.51	17096.7	9487.36	26730.1	2005.7	19409.6	3954.8	3875.71	3874.08
M345T366	[M+H]+	Leu-Gly-Arg	0.839409	2.3377	0.0119195	345.224	365.623			Organic acids and derivatives	Carboxylic acids and derivatives	Amino acids, peptides, and analogues	3427.62	22143.9	23284.3	10517.6	2908.86	3400.38	24879.5	33206.1	20278.8	34595.5	18788.9	21797.6	18212.7	17943.4	17943.5
M302T201	[M+H]+	Leu-Gly-Leu	0.763199	1.27537	0.679984	302.207	200.607			Organic acids and derivatives	Carboxylic acids and derivatives	Amino acids, peptides, and analogues	2557.53	77347.9	49720.5	48770.8	1969.59	827.671	17903.9	24835.2	19846.9	108932	24644.1	34927	31636	31517.6	31413.3
M401T200	[M+H]+	Leu-Ile-Arg	0.825403	0.728998	0.579288	401.275	199.977			Organic acids and derivatives	Carboxylic acids and derivatives	Amino acids, peptides, and analogues	2373.46	103043	78955.8	41851.8	3890.81	1975.5	17283.6	25463.1	24499.6	36810.4	24292.2	40844.9	29713.5	29715.2	28208.4
M227T99	[M+H-H2O]+	Leu-Leu	0.186565	0.849175	0.243914	227.163	98.625			Organic acids and derivatives	Carboxylic acids and derivatives	Amino acids, peptides, and analogues	9876.39	12272.8	17067.2	12694.3	17505.5	11944.6	11986.5	14454.6	9611.32	7926.5	14538.3	10572.3	9583.28	9584.26	9631.98
M408T175	[M+H]+	Leu-Leu-Tyr	0.38842	1.84563	0.0738139	408.249	174.868		C11331	Organic acids and derivatives	Carboxylic acids and derivatives	Amino acids, peptides, and analogues	1115.72	6293.04	5294.69	8245.9	1441.16	859.428	5987.13	7975.03	6215.56	11878.6	5350.22	5504.24	4622.05	4228.27	4207.68
M326T323	(M+CH3CN+Na)+	Leu-Met	0.138551	1.55437	0.124847	326.158	323.188						897.34	269.882	1734.92	1440.54	1006.27	810.534	800.881	1744.65	1077.98	1720.81	2696.45	1533.33	1124.21	1122.81	1190.09
M279T165	(M+H)+	Leu-Phe	0.580268	1.18515	0.624136	279.17	165.056						12599.8	33173.7	53737.6	40263.1	12783.9	11248.6	14187.8	24990.7	22047	62272	33064.9	37572.7	26979.5	26979.5	26755.8
M260T372	(M+CH3CN+H)+	Leu-Ser	0.321155	2.13829	0.000158537	260.16	372.034						1666.65	1515.93	2503.27	930.81	1467.16	2535.34	3589.48	4008.49	3326.03	4274.78	4463.02	3044.98	3398.33	3391.14	3834.54
M375T380	[M+H]+	Leu-Ser-Arg	0.0905239	1.12815	0.566461	375.259	380.161			Organic acids and derivatives	Carboxylic acids and derivatives	Amino acids, peptides, and analogues	4110.13	4046.14	3051.45	2210.02	3141.34	2678.42	3878.55	1289.64	5642.91	3736.26	2582.1	4573.29	3726.87	3678.73	3727.12
M474T373	[M+H]+	Leu-Trp-Arg	0.236788	1.27481	0.468478	474.291	372.801			Organic acids and derivatives	Carboxylic acids and derivatives	Amino acids, peptides, and analogues	1876.79	6234.65	6929.09	4454.55	1003.23	1517.92	4924.23	5316.43	611.092	5150.11	5881.7	6182.92	4471.09	5098.18	5055.25
M295T198	[M+H]+	Leu-Tyr	0.897771	2.1375	0.0619136	295.165	198.011			Organic acids and derivatives	Carboxylic acids and derivatives	Amino acids, peptides, and analogues	2135.1	22499.3	39152.5	23573.2	2167.71	1516.71	19305.3	33566.5	20209.9	53907	31478.9	36140	25209.9	25210	25287.3
M603T318	[M+Na]+	Leucoside	0.411566	0.41274	1.06121e-05	603.11	318.078			Phenylpropanoids and polyketides	Flavonoids	Flavonoid glycosides	5399.88	6598.72	4574.3	6198.04	5679.31	5067.12	2310.45	1905.57	1253.17	3151.32	2492.83	2720.64	4773.49	4785	4785
M245T178	[M+H]+	Leucylleucine	0.959296	0.900522	0.839192	245.185	178.181	HMDB0028933	C11332	Organic acids and derivatives	Carboxylic acids and derivatives	Amino acids, peptides, and analogues	1461.08	75098.8	57468.4	112012	4549.45	2386.54	24259.6	33186.6	33106.7	69115.5	27774.3	40367.9	38580.1	39730.8	37476.7
M462T435	[M+Na]+	Leukotriene e4	0.282429	1.56617	0.140097	462.231	435.122		C05952	Lipids and lipid-like molecules	Fatty Acyls	Eicosanoids	1074.41	5407.53	3797.83	5674.32	1000.08	1026.24	5304.18	4637.06	3016.86	6494.57	5295.48	3412.19	3393.66	3644.87	3402.13
M476T431	[M+Na]+	Leukotriene e4 methyl ester	0.478137	2.50651	0.00102615	476.244	431.168			Organic acids and derivatives	Carboxylic acids and derivatives	Amino acids, peptides, and analogues	3202.92	4987.94	2544.32	5512.39	1656.83	1591.75	4874.39	9935.04	6613.86	10053.4	8689.6	8700.95	5772.82	5757.13	4953.73
M445T193	[M+H+H2O]+	Leupeptin	0.747239	1.90153	0.0731147	445.301	193.471	HMDB0001190	C01591	Organic acids and derivatives	Carboxylic acids and derivatives	Amino acids, peptides, and analogues	2182.85	24394.7	32525.7	10676.2	2897.51	2090.21	20047.1	25930.6	20268.8	31171.9	21338.8	23414.7	20285.9	20167.8	20114.9
M547T469	[M+NH4]+	Lewis x trisaccharide	0.214305	1.536	0.0547702	547.246	469.33	HMDB0006568		Lipids and lipid-like molecules	Fatty Acyls	Fatty acyl glycosides	1535.91	3916.25	2856.72	2271.23	1427.23	1266.68	2194.98	2916.61	3506.45	3926.37	3176.19	4668.34	2887.68	2884.14	2957.56
M676T303	[M+H]+	Lewis y tetrasaccharide	0.146302	1.55557	0.0829732	676.247	302.701			Organic oxygen compounds	Organooxygen compounds	Carbohydrates and carbohydrate conjugates	1471.15	1459.82	394.288	669.434	1039.43	1771.67	1622.56	2154.43	1730.28	2691.81	1447.62	940.199	1481.23	1482.85	1582.09
M213T62	(M+CH3COO+2H)+	Limonene-1,2-epoxide	1.06482	0.441112	0.329185	213.148	62.3425						12240.2	53261.1	10174.3	119245	1047.2	10555.4	9531.51	12434.8	9574.04	26122.2	12072.4	21364.9	33268.6	29948.3	33260.7
M245T34	(M+H-2H2O)+	Linoleic acid	0.60234	1.12889	0.34335	245.226	33.83	HMDB0000673	C01595	Lipids and lipid-like molecules	Fatty Acyls	Lineolic acids and derivatives	66160.3	69539.7	104249	110310	103091	60371	96748.9	77106.7	86857.1	96921.9	99799.8	122501	117129	117131	119941
M279T54	[M+H]+	Linolenic acid	2.15156	0.798544	0.772831	279.231	54.029	HMDB0001388	C06427	Lipids and lipid-like molecules	Fatty Acyls	Lineolic acids and derivatives	52467.7	114525	871191	78024.4	55319.1	66635.9	90163.9	84289.5	41495.1	300661	219724	252394	156540	157598	156534
M324T34	[M+H]+	Linoleoyl ethanolamide	0.479605	0.716856	0.196984	324.289	33.846	HMDB0012252		Organic nitrogen compounds	Organonitrogen compounds	Amines	26197.9	21655.4	62593.7	38270	54939.9	23440.2	20391	29509.9	18146.9	32879.2	23884.8	37984.1	45899.2	48647.4	45864.3
M456T197	[M+Na]+	Lithocholylglycine	0.139365	1.30064	0.152037	456.328	197.374	HMDB0000698	C15557	Lipids and lipid-like molecules	Steroids and steroid derivatives	Bile acids, alcohols and derivatives	1758.49	2531.58	2528.62	1490.59	994.231	1116.81	2152.9	2585.9	1742.27	2579.67	1672.75	2819.6	1509.21	1513.25	1426.06
M259T381_1	[M+H]+	Lofexidine	0.0513055	0.776806	0.316766	259.029	381.451	HMDB0015606		Benzenoids	Benzene and substituted derivatives	Halobenzenes	406.446	215.335	580.744	260.725	229.318	553.528	219.982	236.182	365.384	206.469	467.509	249.254	221.205	214.144	170.024
M413T195	[M+Na]+	Loganin	0.282729	0.365355	0.0611873	413.12	195.411		C01433	Lipids and lipid-like molecules	Prenol lipids	Terpene glycosides	4703.7	1167.01	2328.15	944.41	7234.96	3182.87	1571.82	1456.17	1136.58	1132.81	1026.46	822.916	2331.48	2331.5	2349.28
M629T354	[M+H]+	Lopinavir	0.330246	2.83127	0.00397547	629.373	354.317	HMDB0015539	C12871	Organic acids and derivatives	Carboxylic acids and derivatives	Amino acids, peptides, and analogues	310.392	1870.64	3105.66	1100.95	450.077	229.327	4464.55	4228.37	3031.92	2191.75	3222.26	2869.88	2182.93	1961.43	2191.15
M465T253	[M+Na]+	Lusitanicoside	0.090474	0.911608	0.836806	465.193	253.482		C10474	Organic oxygen compounds	Organooxygen compounds	Carbohydrates and carbohydrate conjugates	557.62	3476.39	556.28	1454.88	623.471	656.229	1944.78	1224.88	807.761	576.377	949.496	1174.11	1415.51	1751.03	1431.1
M287T27	[M+H]+	Luteolin	0.300724	0.34532	0.0642102	287.055	26.569	HMDB0005800	C01514	Phenylpropanoids and polyketides	Flavonoids	Flavones	3336.85	1090.3	1175.73	1043.28	5342.55	6220.2	938.402	421.583	1199.22	1433.5	1067.06	1228.14	1652.15	1651.36	1730.74
M417T446	[M+H]+	Lys-Asn-Arg	1.31531	0.26092	0.179535	417.245	446.043			Organic acids and derivatives	Carboxylic acids and derivatives	Amino acids, peptides, and analogues	4704.5	100743	24467.3	131846	4434.14	4799.49	7021.37	18270.3	11749	13632.6	13011.7	7022.92	7064.72	8187.44	8191.34
M431T420	[M+H]+	Lys-Gln-Arg	0.200542	1.40507	0.29584	431.261	419.689			Organic acids and derivatives	Carboxylic acids and derivatives	Amino acids, peptides, and analogues	700.749	2747.22	2168.76	4277.67	379.053	650.427	3215.76	2728.23	1895.03	2869.32	2859.06	1781.42	2795.41	2593.04	2590.62
M260T358	(M+H)+	Lys-Leu	0.729366	0.558078	0.192646	260.196	358.44						7716.59	38234.8	44301.4	46664.5	8062.45	10210.2	9608.13	9036.22	11253.7	24608.6	12868.6	19232.8	17806.9	17807.3	17672.8
M294T345	[M+H]+	Lys-Phe	0.272766	0.783191	0.491559	294.181	345.413			Organic acids and derivatives	Carboxylic acids and derivatives	Amino acids, peptides, and analogues	2238.13	10146.5	8176.43	7708.56	2943.46	1585.25	2099.48	3093.11	3362.46	6339.53	4214.46	6578.32	7823.62	8588.52	7815.83
M244T457	[M+H]+	Lys-Pro	0.588305	2.09072	0.0386595	244.165	457.264			Organic acids and derivatives	Carboxylic acids and derivatives	Amino acids, peptides, and analogues	4499.14	13947.4	9504.56	9621.91	9881.22	4151.72	25266.4	12439.9	9047.29	31008.1	10197.8	19934.1	10532.4	10531.3	10889.4
M212T456	(M+H-2H2O)+	Lys-Thr	0.249932	1.34031	0.206444	212.139	455.723						6538.04	2889.54	5112.42	1370.6	4193.89	5147.96	4284.4	4728.44	3390.1	6523.91	6548.58	8370.65	6517.42	6288.16	6376.02
M333T410_2	[M+H]+	Lys-Trp	0.746942	2.48085	0.0149943	333.187	410.139			Organic acids and derivatives	Carboxylic acids and derivatives	Amino acids, peptides, and analogues	3233.33	15268.6	21137.8	3560.54	1882.69	3510.28	14832.1	24245.5	15930.9	28882.5	14398.4	22263.1	13993.4	13992.2	14611
M310T381	[M+H]+	Lys-Tyr	0.324949	1.21967	0.238283	310.176	381.295			Organic acids and derivatives	Carboxylic acids and derivatives	Amino acids, peptides, and analogues	9236.08	14674.3	17406.7	11541.6	8755.28	8320.36	16241.6	13968	8971.06	17294.9	11564.1	17257.5	11694	11658.9	10082.6
M846T500	(M+NH4)+	Maltopentaose	0.116805	1.04655	0.768335	846.309	500.036	HMDB0012254		Organic oxygen compounds	Organooxygen compounds	Carbohydrates and carbohydrate conjugates	3267	2572.7	3848.5	1858.41	2758.77	2971.64	4225.09	3865.55	2371.45	2069.25	2666.81	2883.16	3029.76	3028.22	3191.74
M557T50	(M+CH3CN+Na)+	Malvidin 3-O-glucoside cation	0.621924	0.453477	0.0131673	557.164	50.037						15958.5	18309.1	9527.26	25916.3	9826.7	14247	3245.14	9384.34	4051.04	12244.5	6644.02	6960.23	11310.5	11399.8	11213.7
M655T48	[M]+	Malvin	0.301019	1.27459	0.416494	655.178	47.798		C08718	Phenylpropanoids and polyketides	Flavonoids	Flavonoid glycosides	8540.4	5090.78	7844.95	6996.01	8318.41	4858.35	10922.1	17195.7	9948.81	8573.7	3467.12	2978.06	5411.38	5427.35	4925.34
M358T197	M+	Matairesinol	0.178073	1.32085	0.248492	358.149	197.374	HMDB0035698	C10682	Lignans neolignans and related compounds	Furanoid lignans	Tetrahydrofuran lignans	1406.26	3915.41	4588	1784.37	1760.24	1284	3523.57	2709.95	3755.45	2256.08	3135.35	4086.59	2730.53	2809.73	2731.05
M127T217_2	[M+H]+	Melamine	0.831057	1.52279	0.0102559	127.097	216.766	HMDB0041922	C08737	Organoheterocyclic compounds	Triazines	1,3,5-triazines	41090.6	28516.8	38118.8	25834.6	34873.1	28529.4	62706.4	47790	35354.8	41650.6	46894.6	65536.9	44327.5	43467.2	44304.3
M527T439	[M+Na]+	Melezitose	0.363098	0.747878	0.258163	527.157	439.018	HMDB0011730	C08243	Organic oxygen compounds	Organooxygen compounds	Carbohydrates and carbohydrate conjugates	8781.56	18633.6	10679.8	17559.5	7609.16	6432.72	7106.63	11835	6509.86	12818	5884.59	7970.33	9913.68	9733.17	9913.35
M360T448	[M+NH4]+	Melibiose	0.55234	0.420067	0.370922	360.149	447.758	HMDB0000048	C05402	Organic oxygen compounds	Organooxygen compounds	Carbohydrates and carbohydrate conjugates	2745.78	46242.5	2566.17	18493.6	1203.18	2192.47	2419.46	2322.96	1728.76	14799.9	4450.43	5129.85	4816.18	3786.74	4813.9
M288T321	(M+H-H2O)+	Met-Arg	0.336763	1.65686	0.486487	288.155	320.608						4071.2	4858.54	2183.21	2462.9	5399.66	3957.38	2197.78	2525.05	23433.6	4417.39	2871.75	2551.07	3031.8	3030.69	3015.04
M451T440	[M+H]+	Met(o)-Glu-Arg	0.227072	1.71974	0.0470832	451.197	439.977			Organic acids and derivatives	Carboxylic acids and derivatives	Amino acids, peptides, and analogues	941.842	2669.37	2722.4	1146.17	768.652	885.837	2225.65	3937.89	3090.19	2016.2	2111.89	2326.75	1772.62	1844.96	1846.95
M320T278	[M+H]+	Metconazole	0.4036	1.62925	0.343012	320.16	278.306		C18476	Lipids and lipid-like molecules	Prenol lipids	Monoterpenoids	1171.15	10512.8	14969	3365.83	2036.22	1046.45	4424.09	6294.02	3036.21	20050.9	8224.8	11900.5	6947.83	6947.57	7031.47
M248T337	[M+H-C7H14]+	Methanone, [1-(5-fluoropentyl)-6-hydroxy-1h-indol-3-yl](2,2,3,3-tetramethylcyclopropyl)-	0.314892	1.32146	0.42245	248.124	337.103			Organoheterocyclic compounds	Indoles and derivatives	N-alkylindoles	1731.64	14655.9	10457.8	6852.62	977.613	3077.54	7034.47	6997.34	5548.99	12385.7	8897.6	9025.08	8637.19	8636.38	8391.21
M546T397	[M+Na]+	Methionine conjugated chenodeoxycholic acid	0.255029	1.43408	0.224857	546.298	396.811			Lipids and lipid-like molecules	Steroids and steroid derivatives	Bile acids, alcohols and derivatives	1643.22	4405.59	6788.86	2020.96	1497.21	1229.61	3736.65	4097.61	2983.07	5602.08	3780.08	5019.45	4002.44	4016.63	4012.3
M166T357_2	[M+H]+	Methionine sulfoxide	1.56394	0.95212	0.863397	166.053	357.279		C02989	Organic acids and derivatives	Carboxylic acids and derivatives	Amino acids, peptides, and analogues	192359	276543	331574	222097	398274	188357	146397	139541	73203.8	310115	430501	432396	292270	295053	293466
M261T82	[M+H-CH4O]+	Methyl .gamma.-linolenate	0.745777	0.815839	0.652916	261.221	82.077			Lipids and lipid-like molecules	Fatty Acyls	Lineolic acids and derivatives	14270.5	30580.9	104225	95975.1	15159.2	14658.7	19325	38053.3	24707.6	49327.9	40084.2	52751.2	37157.1	37823.2	37444.3
M117T350	[M+H-C3H6O]+	Methyl (4s,5r)-2,2,5-trimethyl-1,3-dioxolane-4-carboxylate	0.348258	0.615557	0.00096519	117.065	349.743			Organic oxygen compounds	Organooxygen compounds	Ethers	7723.31	5611.47	7072.96	5416.96	6877.73	7366.07	5054.73	2551.14	3828	3539.34	4797.93	4893.32	5396.12	5390.2	5375.2
M283T320	[M+H]+	Methyl 3-(3,4-dihydroxy-5-phenyloxolan-2-yl)-3-hydroxypropanoate	0.338057	0.41178	0.0149155	283.094	320.075			Organic oxygen compounds	Organooxygen compounds	Carbohydrates and carbohydrate conjugates	2992.01	6529.7	3860.16	5966.16	2850.17	2302.74	1133.2	1198.44	477.935	3230.84	2110.65	1937.94	3673.5	3549.95	3546.89
M219T455	(M-2H+3Na)+	Methyl 4-hydroxybenzoate	0.193147	0.971544	0.858024	219.005	455.076						9657.04	6101.32	9397.07	3936.16	6943.85	8151.32	8191.7	8622.9	4308.83	5601.97	7976.76	8227.24	7711.2	7545.01	7708.97
M386T149	[M+NH4]+	Methyl chlorogenate	0.539373	0.407547	0.108059	386.144	149.007			Organic oxygen compounds	Organooxygen compounds	Alcohols and polyols	4349.41	15501	4490.64	24096.7	7220.75	4105.32	3120.59	4148.32	4150.51	4887.09	4278.11	3771.99	7084.24	7605.77	7083.61
M234T427	[M+H]+	Methylphenidate	0.414411	1.65023	0.0834161	234.144	427.349	HMDB0014566	C07196	Organic nitrogen compounds	Organonitrogen compounds	Amines	2801.59	11878.1	6828.68	9341.37	3227.68	1524.98	8919.19	11808.7	6412.75	14020.5	9215.85	8375.12	7676.84	8033.24	7671.91
M337T229	(M+H-H2O)+	MG(18:2(9Z,12Z)/0:0/0:0)[rac]	0.596584	1.14052	0.630974	337.273	228.915						21535	60554.1	52168.4	42543.3	24270.4	12824.8	40277.9	33059.5	17400.7	35793.1	59715.5	57705.7	45060	45060.9	45760.8
M188T33	[M+H]+	Molinate	0.400709	0.910723	0.521432	188.127	33.2135		C11086				37117.6	19325.2	24360.9	18506.9	32929.2	27840.2	20500.9	28160.4	31567.7	24028	21928.6	19602.9	21507.4	20396	21496.2
M584T192	[M+H-H2O]+	Montelukast-1,2-diol	0.332353	0.134932	0.0197025	584.214	192.455						4305.71	769.006	378.785	1281.05	4211.93	4615.07	481.944	232.892	394.036	430.434	240.909	319.531	1086.85	1088.03	1215.16
M622T279	[M+H-H2O]+	Moxidectin	0.164457	1.24244	0.530224	622.349	278.579			Phenylpropanoids and polyketides	Macrolides and analogues	Milbemycins	894.946	3750.07	3488.87	1875.89	1127.47	389.994	2790.97	3412.91	2515.2	1236.55	3392.34	973.894	2557.03	2563.42	2282.58
M227T46	[M+H]+	Myristoleic acid	1.00125	2.28264	0.175148	227.2	46.138	HMDB0002000	C08322	Lipids and lipid-like molecules	Fatty Acyls	Fatty acids and conjugates	8699.38	6525.6	78055.9	2852.79	8863.93	7016.67	20728.2	15710.7	26210.3	45587.1	59505.3	87947.1	34811.5	35138	34812.8
M372T168	[M+H]+	Myristoyl-l-carnitine	0.49826	1.66562	0.0607644	372.311	167.912	HMDB0005066		Lipids and lipid-like molecules	Fatty Acyls	Fatty acid esters	9547.18	11636.8	7104.25	6793.06	8317.18	8774.36	13493.9	24631.7	18607.1	5942.54	13580.7	10644	10652.5	10683.4	11246.5
M110T371	[M+H-C6H10O4]+	N-.alpha.-(tert-butoxycarbonyl)-l-histidine	2.12758	1.39469	0.141263	110.071	371.342			Organic acids and derivatives	Carboxylic acids and derivatives	Amino acids, peptides, and analogues	271063	291215	106050	209828	227171	400949	459373	480507	365442	240849	366567	188046	212730	228986	212166
M266T206	[M+H]+	N-.alpha.-(tert-butoxycarbonyl)-l-phenylalanine	0.165605	0.75441	0.496649	266.145	206.405			Organic acids and derivatives	Carboxylic acids and derivatives	Amino acids, peptides, and analogues	1334.25	1518.43	455.748	4250.85	725.523	1470.88	913.094	968.569	1051.36	1385.76	1401.74	1639.26	1096.38	1090.36	841.964
M175T345	[M+H]+	N-.alpha.-acetyl-l-ornithine	1.03387	1.64591	0.286177	175.118	344.951	HMDB0003357	C00437	Organic acids and derivatives	Carboxylic acids and derivatives	Amino acids, peptides, and analogues	26965.8	19272	15429.8	49309.7	30082	26391.8	45715.5	77819.5	103458	15282.4	15164.1	18169.5	22328.2	22222.7	22326.7
M260T326	[M+H-H2O]+	N-(2-hydroxy-1-phenylethyl)benzenesulfonamide	0.291988	0.400031	0.0152037	260.053	326.164			Benzenoids	Benzene and substituted derivatives	Benzenesulfonamides	2883.96	2247.35	3434.41	1904.3	3721.32	6649.85	1789.48	1650.36	713.483	1618.55	1191.7	1373.55	2295.65	2242.07	2241.02
M255T420	[M+H]+	N-(4-fluorobenzoyl)-5-amino-1h-indole	3.10264	0.196725	0.174425	255.108	419.689			Benzenoids	Benzene and substituted derivatives	Benzoic acids and derivatives	3434.78	567484	124050	674503	6345.98	5319.17	21801.8	19540.8	16190.6	95971.1	47327.3	70872.7	138054	139144	138050
M244T374	[M+H]+	N-(aminothioxomethyl)-5-oxo-1-propyl-2-pyrrolidineacetamide	0.170753	1.31713	0.249239	244.093	374.339			Organic acids and derivatives	Carboxylic acids and derivatives	Amino acids, peptides, and analogues	2077.37	4534.47	3657.35	2832.9	1885.87	2920.5	2997.48	3268.24	2277.55	4049.97	4068.54	6925.93	3795.48	3795.09	3591.88
M732T168	[M+H]+	N-(octadecanoyl)sphing-4-enine-1-phosphocholine	0.713454	0.950146	0.720614	731.605	168.099	HMDB0001348	C00550	Lipids and lipid-like molecules	Sphingolipids	Phosphosphingolipids	227884	121392	204456	148854	267739	151595	149846	219255	203950	167126	165317	160493	175500	182573	182622
M232T346	(M+CH3CN+H)+	N-(omega)-Hydroxyarginine	0.164429	1.38134	0.417807	232.14	346.039	HMDB0004224	C05933	Organic acids and derivatives	Carboxylic acids and derivatives	"Amino acids, peptides, and analogues"	2159.97	4037.99	3821.16	3069.75	2388.22	2285.02	2619.33	3947.28	2513.23	10420.2	3020.82	2014.61	2388.74	2530.3	2371.09
M222T247	(M+H)+	N-Acetyl-D-glucosamine	0.586132	1.18683	0.381908	222.097	247.094	HMDB0000215	C00140	Organic oxygen compounds	Organooxygen compounds	Carbohydrates and carbohydrate conjugates	50697.5	49858.2	75811	31661.3	44495.5	38729.5	74536.8	43433.5	31803.9	47584.6	73577.2	74733.3	54467.9	54478.1	53821.7
M269T285	[M+H]+	N-acetyl-l-carnosine	0.423917	1.81856	0.0854898	269.113	284.546			Organic acids and derivatives	Peptidomimetics	Hybrid peptides	1106.73	8724.25	10173.5	6493.85	1182.97	1365.49	6948.94	6725.18	7096.87	13686.4	7066.84	11299.1	6759.41	6659.48	6661.05
M208T276	[M+H-H2O]+	N-acetyl-o-fluoro-dl-phenylalanine	0.328115	0.548688	0.0152374	208.06	275.752			Organic acids and derivatives	Carboxylic acids and derivatives	Amino acids, peptides, and analogues	5368.14	4179.24	3665.07	3998.22	5745.72	8755.5	3504.78	2718.69	1955.49	2504.86	3778.53	2937.57	4027.93	4025.16	3947.8
M368T480	(M+CH3CN+Na)+	N-Acetylaspartylglutamate (NAAG)	0.205269	0.923947	0.797015	368.111	480.137	HMDB0001067	C12270	Organic acids and derivatives	Carboxylic acids and derivatives	"Amino acids, peptides, and analogues"	5479.43	1860.46	2913.66	837.955	2555.8	5959.41	4616.91	3680.1	2976.5	1469.64	3063.76	2308.64	3569.47	3419.54	3414.6
M465T247	[2M+Na]+	N-acetylglucosamine	0.0914167	0.951284	0.868331	465.169	246.758	HMDB0000215	C00140	Organic oxygen compounds	Organooxygen compounds	Carbohydrates and carbohydrate conjugates	1241.09	3179.25	3996.19	1614.92	1032.11	2088.51	2880.48	1046.29	1219.01	3636.09	2000.78	1728.7	2926.08	2738.29	2724.09
M318T388	[M+H-H2O]+	N-acetylglucosaminylasparagine	0.274128	1.30499	0.174385	318.129	388.031			Organic acids and derivatives	Carboxylic acids and derivatives	Amino acids, peptides, and analogues	6469.87	4708.37	3174.3	3939.53	6271.49	5430.76	8754.69	8764.48	7870.84	4019.17	5383.64	4349.62	7314.18	6970.09	7320.68
M310T289	[M+H]+	N-acetylneuraminate	0.175537	1.18575	0.530868	310.139	289.42	HMDB0000230	C00270	Organic oxygen compounds	Organooxygen compounds	Carbohydrates and carbohydrate conjugates	1131.8	3929.81	3694.59	3464.06	1060.19	1023.66	1927.64	2419.63	2149.3	4196.29	3039.65	3228.52	2467.14	2431.67	2419.87
M131T315	[M+H]+	N-acetylputrescine	0.820517	0.86948	0.672746	131.117	315.414	HMDB0002064	C02714	Organic acids and derivatives	Carboximidic acids and derivatives	Carboximidic acids	117383	20092.8	45425	27676.7	91889.2	69621.3	41053.8	97082.3	68844.5	42107.6	47384.4	27050.4	67625.4	68737.1	67629.3
M180T45	[M+H]+	N-acetyltyramine	0.294582	1.76554	0.204699	180.101	45.4935			Benzenoids	Phenols	1-hydroxy-2-unsubstituted benzenoids	1713.7	5218.98	2861.46	3519.88	8672.3	1884.15	4740.36	5004.97	5946.98	13589.2	846.757	12016	7512.2	6968.26	6717.18
M171T244	[M+H-H2O]+	N-alpha-acetyl-l-lysine	0.26217	1.11818	0.758768	171.112	243.699		C12989	Organic acids and derivatives	Carboxylic acids and derivatives	Amino acids, peptides, and analogues	3005.65	14176.4	8785.97	5768.26	2932.84	1066.68	4764.69	7058.5	3083	10095.8	6443.54	8513.65	6765.32	6766.06	6640.13
M149T58	[M+H]+	N-benzylacetamidine	0.611264	0.659632	0.23644	149.132	57.812						7735.17	33248.4	37661.8	35319.7	12386.9	8237.65	13684.9	14486.2	8064.68	17324.6	17431.9	17787.3	20593.3	23361.1	20511.3
M176T383	[M+H]+	N-carboxyethyl-.gamma.-aminobutyric acid	0.38279	0.634074	0.170734	176.091	383.144	HMDB0002201		Organic acids and derivatives	Carboxylic acids and derivatives	Amino acids, peptides, and analogues	16041.1	5146.71	4508.16	4942.04	7508.85	13323.5	4473.75	3721.85	5181.69	8695.43	4984.27	5579.1	7231.2	7028.91	7222.65
M416T250	[M+H]+	N-demethylmifepristone	0.515857	1.36654	0.405649	416.25	250.02			Lipids and lipid-like molecules	Steroids and steroid derivatives	Oxosteroids	8256.06	16594.7	34013.9	10353.1	2151	4032.65	15709.9	15621.1	8791.84	25144	21993.1	15779.3	14969.1	14972.5	14113.2
M196T130	(M+Na)+	N-Desmethylselegiline	0.341457	1.19612	0.603249	196.105	129.834						11230.9	7236.88	11339.6	7986.97	13998.3	12263.3	2439.83	6964.39	6746.53	12832.7	22697	24938	14443.1	13775.5	14426.4
M648T176_1	[M+H]+	N-lauroyl-d-erythro-sphingosylphosphorylcholine	0.256999	1.16691	0.0252836	647.51	175.866	HMDB0012096		Lipids and lipid-like molecules	Sphingolipids	Phosphosphingolipids	10332.8	9866.2	10863.6	7872.83	10324.4	10148.4	9887.29	10829.5	11707.7	12124.1	11562.9	13212.6	10446.9	10674.7	10448.5
M134T351_2	[M+H]+	N-methyl-l-threonine	0.85422	1.51778	0.0458139	134.056	351.167			Organic acids and derivatives	Carboxylic acids and derivatives	Amino acids, peptides, and analogues	45069.6	50875	39628.7	32956.6	51851.9	35942.1	94962.3	30283	82085.9	54252.1	65276.5	62182.8	54484.3	54484.1	54311.6
M730T169	[M+H]+	N-oleoyl-d-erythro-sphingosylphosphorylcholine	0.952822	1.24084	0.0774727	729.59	169.389	HMDB0012101		Lipids and lipid-like molecules	Sphingolipids	Phosphosphingolipids	130473	75883.7	87556.7	61120.3	86057	103428	96537.3	108449	116134	112607	135199	106736	91251	90015	91253
M256T34	[M+H-C18H34O2]+	N-palmitoyl-d-sphingosine	2.07492	1.16127	0.137775	256.263	34.495	HMDB0004949		Lipids and lipid-like molecules	Sphingolipids	Ceramides	671020	664285	792286	559397	495655	597059	677987	713365	866704	640831	878608	611774	667252	673891	667228
M314T54	[M+H]+	N-palmitoylglycine	0.459297	0.841865	0.615816	314.269	54.3	HMDB0013034		Organic acids and derivatives	Carboxylic acids and derivatives	Amino acids, peptides, and analogues	9322.41	26066	37746.9	22221.1	6098.15	10034.7	10119.9	10805.7	8355.49	21119.3	20392.2	23066.3	19798.4	19350.2	19350
M216T58	[M+H-C4H9NO2]+	N-phenylacetyl-l-prolylglycine ethyl ester	0.561585	0.244569	0.0195146	216.108	58.447			Organic acids and derivatives	Carboxylic acids and derivatives	Amino acids, peptides, and analogues	3314.53	14674.9	5101.95	17200.2	6293.03	6327.77	1465.28	1646.38	1104.07	1066.8	4980.24	2677.95	9204.8	9508.15	9104.94
M157T47_1	M+	N-Tigloylglycine	0.515663	0.774017	0.693844	157.075	46.803						11754.7	7554.71	6868.96	49114.6	4480.04	1610.7	8481.42	10101.1	1291.66	13164.8	16828	13125.5	17921.8	17593.5	17590.5
M312T187	[M+H]+	N,n-dimethylguanosine	0.358347	0.820529	0.171167	312.13	186.977	HMDB0004824					23843.3	23307	21054.4	18607	26907.4	24547.5	17297.2	12159.5	27779.6	16719.1	14203.2	25293.3	16633.2	13820.6	16732.6
M204T347	[M+H-C8H15NO6]+	N,n'-diacetylchitobiose	0.110781	0.918492	0.894262	204.099	347.239	HMDB0003556	C01674	Organic oxygen compounds	Organooxygen compounds	Carbohydrates and carbohydrate conjugates	22246.1	16874.1	3461.24	4051.49	1419.69	442.402	2238.88	1874.93	16537.1	3128.58	3117.33	17645.5	14424.1	5164.69	14381.2
M144T248	[M+H-NH3]+	N.alpha.-methyl-l-lysine	0.490776	0.742491	0.272094	144.08	248.413			Organic acids and derivatives	Carboxylic acids and derivatives	Amino acids, peptides, and analogues	22093.4	17691.5	22898.4	17940.4	29877.3	9028.42	9898.23	8281.22	4284.17	20350	21785.6	24150.3	17766.5	17765.6	17600.7
M189T338	[M+H]+	N.epsilon.-acetyl-l-lysine	0.37837	0.713848	0.101174	189.123	337.763	HMDB0000206	C02727	Organic acids and derivatives	Carboxylic acids and derivatives	Amino acids, peptides, and analogues	17561.7	7768.53	14926.5	7194.1	18645.2	12046.3	7489.9	10631.9	7850.04	10738.7	9800.18	9271.11	13517.5	13064	13062.7
M577T465	[M+H]+	N(6)-((aminoethylamino)carbonyl)methylphenyladenosine	0.247067	1.77651	0.0239099	577.258	464.697						937.997	1846.41	3426.11	1585.89	1138.14	712.488	2173.4	2946.19	2433.63	2558.63	3220.38	3805.85	2484.2	2363.91	2484.75
M298T406	[M+H]+	N(6)-oh-me-adenosine	0.203775	0.956397	0.91117	298.128	405.818						5430.18	2724.71	4966.76	5893.67	1605.4	9567.89	4140.97	11901	4397.86	5220.7	1335.14	1876.66	4495.42	4821.15	4825.66
M387T246	[M+H]+	N6-2-(4-aminophenyl)ethyladenosine	0.275264	0.986559	0.953946	387.175	245.822						10979.8	10532	15254.7	6740.1	11186.1	8136.81	10832	6745.08	2999.4	9981	16586.9	14840.6	11368.2	11257.7	11257.7
M161T520	[M+H]+	N6-methyl-l-lysine	0.337181	0.777514	0.0573066	161.128	519.733	HMDB0002038	C02728	Organic acids and derivatives	Carboxylic acids and derivatives	"Amino acids, peptides, and analogues"	16745.4	15170.6	11099.3	11611.7	10677.9	10976.8	10096.3	7334.61	9564.67	8750.33	10433.4	13130.8	11708.8	11699	12246.7
M282T371	(M+H)+	N6-methyladenosine	0.214703	0.822044	0.200245	282.119	370.596	HMDB0004044		Nucleosides, nucleotides, and analogues	Purine nucleosides		7098.03	4746.68	4510.58	2729.9	6546.56	5512.61	4344.23	4867.4	3427.49	3980.19	4315.55	4667.16	5340.95	5204.78	5204.02
M413T328	[M+H]+	N6-threonylcarbamoyladenosine	0.096071	0.848688	0.48059	413.142	327.531						1030.42	1524.79	1442.47	1010.39	894.86	801.694	458.137	585.27	502.682	1293.65	1506.4	1344	1096.37	1076.06	1156.91
M910T325_1	[M+Na]+	NCGC00347372-02	0.165748	1.06921	0.89742	909.502	325.029			Lipids and lipid-like molecules	Steroids and steroid derivatives	Steroidal glycosides	47.2488	3337.52	3700.43	1106.36	20.9844	64.4734	1919.96	2030.38	1080.22	1646.81	1078.79	1093.7	1507.92	1499.85	1507.94
M681T439	[2M+H]+	Neomenthyldiphenylphosphine oxide	0.500819	4.37887	8.20131e-06	681.392	438.626			Lipids and lipid-like molecules	Prenol lipids	Monoterpenoids	510.929	883.946	3804.9	957.327	932.897	1107.88	5387.29	6491.31	5179.19	6137.54	6747.99	5954.08	3328.03	2493.31	3320.37
M455T245	[M+H-C6H12N2O3]+	Neomycin	0.229635	0.590126	0.470731	455.245	244.935	HMDB0015129	C01737	Organic oxygen compounds	Organooxygen compounds	Carbohydrates and carbohydrate conjugates	815.972	16450.7	4543.18	1890.9	2226.72	1449.39	1026.02	2750.92	2797.94	4321.03	1287.17	3972.7	3282.9	3266.68	3324.59
M203T505	[M+H]+	Ng,ng-dimethyl-l-arginine	2.39619	0.708499	0.216577	203.151	504.522	HMDB0001539	C03626	Organic acids and derivatives	Carboxylic acids and derivatives	Amino acids, peptides, and analogues	401721	324785	582794	1.19652e+06	674978	591231	454416	397337	493361	703785	312995	310582	518359	544719	711427
M203T536	(M+H)+	NG,NG-dimethyl-L-arginine(ADMA)	0.417674	0.918989	0.606193	203.151	535.543						74989	55617.6	37132.1	39147.6	35217	48731.6	46959.8	30478.5	44657.7	36637.4	50259.9	58280.9	39807.4	39687.8	41210.8
M123T62	[M+H]+	Niacinamide	1.34776	1.33134	0.339416	123.055	61.683	HMDB0001406	C00153	Organoheterocyclic compounds	Pyridines and derivatives	Pyridinecarboxylic acids and derivatives	89136.5	321291	300455	110553	208720	121316	275682	237725	180250	193422	481417	164504	224272	229562	224314
M480T290	[M+H]+	Nicardipine	0.172858	1.76333	0.0711912	480.221	290.05	HMDB0014760	C07264	Organoheterocyclic compounds	Pyridines and derivatives	Hydropyridines	585.561	1561.98	1372.04	1511.89	545.75	558.153	1499.52	978.69	1502.7	2041.65	1510.97	3285.15	1521.42	1518.96	1464.75
M155T424	[M+H-C6H5ClO2N2]+	Niclosamide	0.150854	0.958048	0.629178	155.009	423.568	HMDB0015679		Benzenoids	Benzene and substituted derivatives	Anilides	7988.23	6214.32	7410.73	4468.56	6584.45	6584.95	6339.03	5968.09	6013.89	5482	7270.02	6531.51	6679.69	6724.03	6724.14
M664T426_1	(M+H)+	Nicotinamide adenine dinucleotide (NAD)	0.567626	1.29237	0.116014	664.116	426.069	HMDB0000902	C00003	Nucleosides, nucleotides, and analogues	(5'->5')-dinucleotides		32508.9	22102.7	27073.5	6327.4	29595.3	27580.9	33710.5	31478.5	27810.1	27535.7	30154.9	36947.6	29322.4	29157.7	29259.7
M335T455_1	[M+H]+	Nicotinamide ribotide	0.330539	0.730215	0.0209429	335.063	455.307	HMDB0000229	C00455	Nucleosides, nucleotides, and analogues	Pyridine nucleotides	Nicotinamide nucleotides	12485.9	11166.3	11067.4	8057.2	9546.27	9125.15	10184.6	6912.14	4538.54	7760.31	8443.58	7031.22	10851.5	10864.5	10799
M124T212	[M+H]+	Nicotinate	0.729814	0.689038	0.0928459	124.039	212.09	HMDB0001488	C00253	Organoheterocyclic compounds	Pyridines and derivatives	Pyridinecarboxylic acids and derivatives	28656.9	53650.1	34604.1	56172.3	23365	26014.9	29736.3	26308.8	17283.4	21737.4	28013.4	30206.2	33912.3	33911.2	33505.7
M163T45	(M+H-H2O)+	Nicotinuric acid	0.335706	0.87346	0.663903	163.049	45.125	HMDB0003269	C05380	Organic acids and derivatives	Carboxylic acids and derivatives	"Amino acids, peptides, and analogues"	75314.8	17809	41041.1	22199.7	23637.5	16916.1	29720.6	25201.8	28589.7	32841.5	27267.2	28379.4	29488.7	12732.7	29551.2
M306T252	(M+CH3CN+Na)+	Nname,Clomipramine	0.229217	1.02786	0.858479	306.08	251.618						11572.4	14807.6	22636.8	9964.14	14958.6	10087.1	17783.9	15317.5	13411.2	12120.2	12494.7	15240.4	17847.9	17577.2	17847.4
M825T441	[M+H]+	Nodularin	0.223418	1.72178	0.0190034	825.446	441.392		C15713	Organic acids and derivatives	Carboxylic acids and derivatives	Amino acids, peptides, and analogues	914.532	2258.78	2468.76	1617.48	481.595	737.935	2616.03	2793.63	2020.28	2705.03	2048.39	2415.79	1519.28	1650.99	1650.75
M136T109	[M+H-CH3O5P]+	O-phosphotyrosine	0.657062	2.14018	0.0313112	136.074	108.975	HMDB0006049	C06501	Organic acids and derivatives	Carboxylic acids and derivatives	Amino acids, peptides, and analogues	9409.35	874.433	11533.3	21464.9	4128.36	6298.15	11012.3	26709.9	26344.5	22759.6	14105.4	14014	11744.3	11963	11811.4
M213T173	[M+H]+	O-tolidine	0.326285	1.67103	0.0700055	213.159	172.686		C14443	Benzenoids	Benzene and substituted derivatives	Biphenyls and derivatives	4960.24	7066.58	6330.15	4064.32	1891.71	847.057	5162.4	8753.97	5935.57	10964.4	6192.05	5034.76	6863.66	8070.59	6848.2
M91T289	[M+H-NH3]+	O-toluidine	0.334759	0.885767	0.660428	91.0535	289.02	HMDB0041965	C14403	Benzenoids	Benzene and substituted derivatives	Toluenes	13186.6	7666.63	9530.3	7546.87	18387.9	10023.6	7324.02	5591.79	3336.82	11732.5	18237.3	12541	10356.5	10391.7	10356.5
M843T447_2	[M+K]+	Okadaic acid	0.167562	1.24355	0.523577	843.414	446.572		C01945	Organic oxygen compounds	Organooxygen compounds	Ethers	797.457	2231.16	4075.85	1570.51	652.768	721.585	2550.97	2660.19	1868.28	2410.38	715.692	2291.3	1942.16	1920.4	1920.38
M282T34_2	[M+H]+	Oleamide	7.79201	1.1312	0.323695	282.28	33.838	HMDB0002117	C19670	Lipids and lipid-like molecules	Fatty Acyls	Fatty amides	9.71971e+06	1.05651e+07	1.60492e+07	1.60651e+07	1.45498e+07	1.05146e+07	1.4427e+07	1.09349e+07	1.18141e+07	1.68649e+07	1.67964e+07	1.67896e+07	1.75257e+07	1.75755e+07	1.75257e+07
M620T33	[2M+H]+	Oleoyl ethylamide	1.13878	1.13581	0.343893	619.613	33.207			Lipids and lipid-like molecules	Fatty Acyls	Fatty amides	231380	174373	348683	291715	351285	410355	354820	250312	315896	374118	371098	387058	558707	558696	561345
M516T382	[M+K]+	Oleyloxyethylphosphorylcholine	0.308999	1.11481	0.796792	516.339	381.717			Organic nitrogen compounds	Organonitrogen compounds	Quaternary ammonium salts	1336.21	9096.64	12860.2	6689.28	2676.52	1421.9	3126.62	3484.1	2281.1	9936.11	8310.95	10854.8	6135.27	5933.14	6004.94
M443T268	[M+H-C17H30O8]+	Oligomycin b	1.13455	0.354298	0.102521	443.297	268.123		C11312				16211.5	95823.6	41329.3	73481.8	23004.4	4436.56	10341.7	10632.2	6486.4	24756.1	4942.67	32934.5	31648.5	31241.9	31238.3
M541T333	[M+H-H2O]+	Olmesartan medoxomil	0.155269	0.742213	0.470345	541.222	333.252			Benzenoids	Benzene and substituted derivatives	Biphenyls and derivatives	466.977	2563.8	1240.46	2742.83	479.827	390.875	766.461	1122.42	668.167	1252.1	1006.82	1036.2	1152.34	1065.32	1062.23
M855T349	[M+H]+	Ophiopogonin d	0.141889	1.3943	0.346394	855.457	349.471			Lipids and lipid-like molecules	Steroids and steroid derivatives	Steroidal glycosides	382.86	1845.5	2226.62	1076.53	356.461	374.726	1835.56	2274.59	721.866	883.88	1751.59	1264.57	1005.72	1007.7	1079.33
M534T258	[M+K]+	Orlistat	0.198864	1.31316	0.0384622	534.339	257.944	HMDB0015215		Organic acids and derivatives	Carboxylic acids and derivatives	Amino acids, peptides, and analogues	1702.05	2992.55	3621.06	3233.43	2795.02	2152.75	4187.19	3253.02	2951.61	3461.19	4305.3	3504.72	3671.36	3166.09	3342.22
M307T31	[M+H]+	Oxandrolone	4.86257	0.101537	0.147775	307.226	31.089	HMDB0014759	C07346	Lipids and lipid-like molecules	Steroids and steroid derivatives	Steroid lactones	65513.5	1.98136e+06	163922	1.18446e+06	50188.9	47072.1	41341.2	53055.1	28103	80131.2	68769.4	83220.4	297173	292872	292862
M413T34	(2M+H)+	Oxotremorine	0.231056	1.19352	0.295508	413.284	33.816						5770.64	3580.92	5341.12	1727.47	6001.58	6979.16	5920.26	5619.83	4883.24	5778.96	7478.7	5409.44	5983.36	5227.83	5109.12
M566T383	[M+H-C2H5N]+	Oxyacanthine	0.0694876	0.934803	0.589914	566.252	382.541	HMDB0030172	C09598				3675.37	4466.46	3165.94	2167.49	2531.51	3442.09	2539.67	3243.17	2415.89	3305.75	3320.3	3356.09	3492.14	3555.05	3489.43
M162T201	[M+H-H2O]+	P-acetaminobenzoic acid	0.574382	0.501938	0.00688868	162.054	201.22			Benzenoids	Benzene and substituted derivatives	Benzoic acids and derivatives	11813.3	11259.5	12320.3	25255.6	18350	16606.7	5817.93	5386.4	8288.21	9107.25	10297.8	9090.38	11538.8	13395	13396.4
M182T244	(M+Na)+	Pargyline	0.423358	2.97455	0.0013321	182.092	243.872	HMDB0015563	C07414	Benzenoids	Benzene and substituted derivatives	Phenylmethylamines	1765.18	2760.77	2768.38	984.401	1599.21	1175.32	5426.9	8151.26	7309.19	4443.48	3488.77	4058.92	2279.57	2481.89	2483.63
M330T368	[M+H]+	Paroxetine	0.503602	1.8251	0.0999064	330.166	367.759	HMDB0014853	C07415	Organoheterocyclic compounds	Piperidines	Phenylpiperidines	1448.84	8798.31	16977.3	7020.38	2790.37	2183.53	7850.32	9790.95	8159.28	18663.8	11801.3	15312.4	9370.34	9699.54	9364.78
M827T143	M+	PC(20:5(5Z,8Z,11Z,14Z,17Z)/20:5(5Z,8Z,11Z,14Z,17Z))	0.315127	0.847876	0.479412	826.522	142.994						14454.1	11265.1	17885.7	4988.78	22651.8	16165.2	7269.7	9650.5	9530.37	18550.2	15600.6	13511.9	15362.4	16365.5	16328.4
M558T438	[M+H-C3H8O2]+	Penitrem a	0.215991	1.07775	0.857379	558.262	438.149		C20070				1035.77	5573.64	7359.48	2581.94	810.16	876.165	2001.26	3313.7	1512.96	4906.37	2964.76	4956.06	2936.76	3051.86	3054.47
M135T33	(M+H-H2O)+	Perillyl alcohol	0.561677	0.949525	0.748313	135.116	33.185						32509.7	69371.4	61085.8	69166.9	37613.2	31835.8	47526.5	41766.5	48937.3	47474.2	44425.1	56230.9	56888.9	57594.8	57592.5
M369T521	[M+H]+	Perindopril	0.824762	2.40906	0.179503	369.249	521.341	HMDB0014928	C07706	Organic acids and derivatives	Carboxylic acids and derivatives	Amino acids, peptides, and analogues	6880.96	8177.43	25531.4	8246.26	12417.4	7690.44	14446.2	78676.5	35270.6	12363.5	13369.7	11963.2	20642.1	21241	20643.5
M324T249	[M+H]+	Phe-Ala-Ser	0.404526	1.81521	0.0527266	324.155	249.36			Organic acids and derivatives	Carboxylic acids and derivatives	Amino acids, peptides, and analogues	1469.51	7300.65	8848.97	4809.63	909.772	2117.85	5896.33	9165.24	4994.75	10417.7	7897.42	7837.32	8922.94	8286.87	8933.4
M280T280	[M+H]+	Phe-asn	0.207945	1.35358	0.349797	280.13	279.991			Organic acids and derivatives	Carboxylic acids and derivatives	Amino acids, peptides, and analogues	1472.19	4657.27	4546.28	2682.53	1635.65	1607.39	1857.68	2297.81	2258.98	5918.43	3906.86	6231.4	3039.64	2860.63	3001.23
M425T196	[M+H]+	Phe-Cys-Arg	0.264981	0.390842	0.124889	425.178	196.165			Organic acids and derivatives	Carboxylic acids and derivatives	Amino acids, peptides, and analogues	935.189	2822.23	910.015	6649.97	2767.67	953.779	725.419	1018.27	863.053	1268.09	978.043	1024.94	1408.04	1408.11	1391.96
M451T208	[M+H]+	Phe-Glu-Arg	0.416492	1.3134	0.576243	451.254	207.536			Organic acids and derivatives	Carboxylic acids and derivatives	Amino acids, peptides, and analogues	1708.79	11650.8	24815.8	5080.18	2824.52	1699.6	7170.84	13263.6	6631.19	20441.7	7352.37	7894.18	8161.39	7778.21	7780.57
M223T255	[M+H]+	Phe-gly	0.698434	1.91156	0.0948248	223.107	254.743		C18481	Organic acids and derivatives	Carboxylic acids and derivatives	Amino acids, peptides, and analogues	6400.34	14174.3	30527.7	9375.62	5346.53	4052.23	19178	16525.6	9075.98	38003	22509.6	28280.8	14909.8	14910.4	15080.9
M351T341	[M+H]+	Phe-Gly-Lys	0.155763	1.05051	0.870904	351.202	340.913			Organic acids and derivatives	Carboxylic acids and derivatives	Amino acids, peptides, and analogues	2851.54	6964.91	6071.2	5472.94	2885.36	2078.05	5439.18	7969.14	647.85	3932.98	3389.15	6275.36	4060.31	3919.21	4060.85
M313T245	[M+H]+	Phe-met(o)	0.291161	1.45698	0.0236201	313.121	244.508			Organic acids and derivatives	Carboxylic acids and derivatives	Amino acids, peptides, and analogues	2995.33	3591.02	4972.53	4851.03	3937.52	3224.53	4302.82	5186.67	4102.55	6284.8	7660.82	6806.27	5626.18	5362.62	5359.75
M313T131	[M+H]+	Phe-phe	0.470895	0.435234	0.0301439	313.153	131.364			Organic acids and derivatives	Carboxylic acids and derivatives	Amino acids, peptides, and analogues	10407.6	8213.07	9104	8978.13	5762.26	20934	2704.77	7874.73	1806.19	6561.82	4913.2	3732.74	5166.01	5270.09	5047.59
M263T227	[M+H]+	Phe-pro	1.18034	1.87845	0.126515	263.14	227.007	HMDB0011177		Organic acids and derivatives	Carboxylic acids and derivatives	Amino acids, peptides, and analogues	23365.4	42520.4	76845.7	36059	28072.2	17200.1	37369.2	37151.6	30209.9	127792	70650.5	117717	46054.5	46055.6	48765.2
M267T205	[M+H]+	Phe-thr	0.41102	1.6691	0.125584	267.134	204.698			Organic acids and derivatives	Carboxylic acids and derivatives	Amino acids, peptides, and analogues	2523.64	7519.83	11791.3	6914.17	2755.97	2178.42	6543.21	8462.09	4947.08	16307.9	9189.86	10770.6	7378.84	7458.7	7378.21
M423T245	[M+H]+	Phe-Thr-Arg	0.548578	2.24571	0.0651172	423.223	245.367			Organic acids and derivatives	Carboxylic acids and derivatives	Amino acids, peptides, and analogues	1248.98	9436.46	10964.1	6039.42	4389.24	1077.51	6643.18	13159.4	2123.16	21890.4	15715.7	14926.3	7611.01	8807.92	7446.71
M265T247	(M+H)+	Phe-Val	0.326206	0.47674	0.0191033	265.154	246.827						4295.73	8623.87	2826.19	4131.92	6410.88	3778.8	2283.09	2707.69	2128.74	835.176	3080.81	3298.82	4456.68	4364.08	4364.7
M103T247	[M+H-H2O]+	Phenylacetaldehyde	1.97034	0.702817	0.192629	103.053	247.252	HMDB0006236	C00601	Benzenoids	Benzene and substituted derivatives	Phenylacetaldehydes	252019	319872	368344	272342	430398	147133	141434	107598	64674.7	290611	293619	360181	270919	268419	268401
M150T232	[M+H-H2O]+	Phenylephrine	0.746441	1.3141	0.143557	150.077	232.049	HMDB0002182	C07441	Benzenoids	Phenols	1-hydroxy-4-unsubstituted benzenoids	48947.7	32787.9	37722.7	29133	43645.6	41304.3	37818.2	64800.1	80208.3	43370.8	37659.8	43040.5	44839.2	45424.9	45620
M435T196	[M+H]+	Philanthotoxin 74	0.34059	2.46182	0.00145528	435.332	196.251			Organic acids and derivatives	Carboxylic acids and derivatives	Amino acids, peptides, and analogues	3064.15	1021	1442.56	949.431	1614	2452.67	5417.67	3996.61	2567.56	3638.65	5758.89	4577.61	3068.26	2938.6	2805.63
M184T178	(M+H)+	Phosphorylcholine	0.931688	1.33748	0.197012	184.073	178.396	HMDB0001565	C00588	Organic nitrogen compounds	Organonitrogen compounds	Quaternary ammonium salts	66161.8	51387.6	81481.5	10518.3	62779	46571.6	69168.1	60657.1	37580.7	83995	97035	78087.5	79189.3	74232.3	73023.3
M585T232	[2M+H]+	Picrotoxinin	0.310218	0.354536	0.0764558	585.198	232.202	HMDB0002322	C09529				4298.18	870.761	1199.37	782.368	5175.86	6443	1493.63	1164.22	796.21	1446.38	825.529	928.507	2314.43	2250.15	2185.57
M442T319	[M+H]+	Platensimycin	0.239032	1.74847	0.135129	442.169	318.748		C20132	Benzenoids	Benzene and substituted derivatives	Benzoic acids and derivatives	909.635	3594.27	3637.84	2096.38	876.382	1225.95	2278.38	4311.96	1675.38	7091.42	3197.23	3022.53	2343.59	2410.45	2340.83
M119T34	[M+H-C6H12O2]+	Polygodial	0.493954	1.01419	0.930023	119.085	34.477		C09712				24841.1	48358	34204.1	52988.1	23421.8	27548.7	27090.7	33280	36402	41809	38806.6	36972.2	55347	54122.3	55340
M701T459	[M+H]+	Posaconazole	0.275279	2.33618	0.004351	701.316	458.608			Organoheterocyclic compounds	Diazinanes	Piperazines	1079.94	1555.67	1733.77	1362.54	754.814	986.448	2479.64	4512.77	1873.63	3051.82	3668.84	1871.99	1853.72	1688.45	1865.72
M359T483	[M+H]+	Pracinostat	0.174726	0.726495	0.368934	359.23	482.714						3851.54	895.014	944.931	819.776	2512.96	2958.68	1822.45	1691.18	838.43	1815.79	1977.1	560.566	1405.33	1408.43	1215.12
M260T280	[M+H]+	Primaquine	0.735245	1.32838	0.51313	260.16	280.137	HMDB0015219	C07627	Organoheterocyclic compounds	Quinolines and derivatives	Aminoquinolines and derivatives	3364.98	48992.8	41815.1	45683.6	3812.69	3575.75	19823.5	25724.3	15055.9	63477.7	29227.4	42288.9	25465	26268.1	25458.5
M230T362	(M+H)+	Pro-Asn	0.419073	1.69858	0.0379245	230.113	361.658						2702.19	6273.4	9350.17	6762.76	3813.42	4671.39	8281.56	5796.83	6162.66	12141	13473.6	11171.2	7111.18	6965.1	6968.94
M231T401	[M+H]+	Pro-Asp	0.76013	1.60891	0.153365	231.097	400.589			Organic acids and derivatives	Carboxylic acids and derivatives	Amino acids, peptides, and analogues	7842.77	21446.4	49164.6	14699.8	12327.6	9354.29	28509.9	24371.2	15606.5	41164.8	33405	41702.5	24676.1	25095.6	24675.6
M244T358	[M+H]+	Pro-gln	0.97956	2.73751	0.000101895	244.129	357.607			Organic acids and derivatives	Carboxylic acids and derivatives	Amino acids, peptides, and analogues	9094.35	10843.8	20309.3	7725.46	7856.11	8971.55	33948.2	29633.9	22013	37696	25421.5	28679.8	18680.5	18442.8	18439.7
M245T407	[M+H]+	Pro-Glu	0.859157	0.685278	0.0215797	245.113	407.399			Organic acids and derivatives	Carboxylic acids and derivatives	Amino acids, peptides, and analogues	62327.6	43231.1	47428.7	29385.4	62669.1	52989.5	36521.9	32342.3	23601.4	33585.9	35631.1	42551.7	41553	41329.1	41335.7
M201T209	[M+2H]2+	Pro-Glu-Arg	0.453779	0.222321	0.0125142	201.086	209.056			Organic acids and derivatives	Carboxylic acids and derivatives	Amino acids, peptides, and analogues	6871.25	10233	726.644	6054.1	2316.11	8005.46	1071.41	1673.48	1369.74	1079.1	1440.1	971	1922.15	1866.69	1866.82
M187T286	[M+2H]2+	Pro-Glu-Lys	0.219763	1.32693	0.356949	187.107	285.84			Organic acids and derivatives	Carboxylic acids and derivatives	Amino acids, peptides, and analogues	1177	4847.15	5520.83	2869.45	1688.32	1349.96	2362.35	2909.8	2310.84	5687.61	5364.17	4523.72	4212.31	4243.05	3946.6
M329T329	[M+H]+	Pro-Gly-Arg	0.345476	1.67248	0.0842836	329.181	328.868			Organic acids and derivatives	Carboxylic acids and derivatives	Amino acids, peptides, and analogues	1414.61	4239.53	6201.5	7217.45	1375.33	1460.72	5063.43	8974.51	5471.1	7415.45	4580.32	5137.83	5597.76	6100.94	5655.07
M409T349	[M+H]+	Pro-His-Arg	0.228746	0.941038	0.858148	409.244	349.113			Organic acids and derivatives	Carboxylic acids and derivatives	Amino acids, peptides, and analogues	1539.26	6489.42	6885.08	6852.43	2080.32	996.033	2727.85	3811.31	2769.14	6277.07	2565.56	5226.84	4395.93	4216.96	4395.75
M229T413	[M+H]+	Pro-hyp	0.793101	0.324325	0.0273598	229.118	412.67	HMDB0006695		Organic acids and derivatives	Carboxylic acids and derivatives	Amino acids, peptides, and analogues	30945.2	11312.1	7401.42	5655.96	31252.1	27358.6	6538.72	4341.7	7236.49	5533.4	5847.89	7450.63	12813.3	12710.8	12042
M244T410	[M+H]+	Pro-lys	0.339165	1.22249	0.436377	244.165	409.522			Organic acids and derivatives	Carboxylic acids and derivatives	Amino acids, peptides, and analogues	4773.94	10073.3	8695.23	16711.6	3791.19	4238.15	8833.9	8798.22	7418.46	13680	9663.26	10632	8810.1	8686.79	8809.78
M403T444	[M+H]+	Pro-Met-Arg	0.146893	1.18376	0.639341	403.204	443.75			Organic acids and derivatives	Carboxylic acids and derivatives	Amino acids, peptides, and analogues	1598.15	3423.31	5667.5	431.078	1478.66	1595.96	2349.84	1925.92	3058.37	1330.08	3812.88	4325.92	2981.67	2570.59	2603.2
M263T46	(M+H)+	Pro-Phe	0.529193	0.192706	0.223614	263.138	45.518						10822.4	50150.5	1785.92	1985.39	2454.62	7021.05	1972.97	1843.04	2659	2468.94	2721.67	2637.01	2409.91	2713.45	2369.5
M213T407	[M+H]+	Pro-pro	1.0964	1.59878	0.143948	213.123	407.035			Organic acids and derivatives	Carboxylic acids and derivatives	Amino acids, peptides, and analogues	36288.7	48060.6	101039	44355.7	39470.4	41226.4	100254	44741.5	27636.7	141520	97242.7	84932.5	59160	59156.9	62931.4
M263T69	(M+CH3COO+2H)+	Pro-Ser	0.39902	0.366972	0.191988	263.127	68.984						837.747	13342	1108.88	11174.4	2150.63	1856.73	2166.08	1527.08	1948.04	1818.9	1815.76	1905.93	2559.85	2443.42	2446.83
M217T357	[M+H]+	Pro-Thr	1.55131	0.706124	0.441444	217.13	357.279	HMDB0004620		Organic acids and derivatives	Carboxylic acids and derivatives	Amino acids, peptides, and analogues	60750.7	294450	334733	145212	56783.2	38947.5	80504.8	77337.9	63386.4	200982	98535.6	136568	161671	159329	159340
M187T351	[M+2H]2+	Pro-Thr-Arg	0.394478	1.55378	0.0772649	187.107	351.052			Organic acids and derivatives	Carboxylic acids and derivatives	Amino acids, peptides, and analogues	4908.16	9275.53	10146	8019.07	4609	4555.87	7791.63	9486.86	6956.25	18116.4	10018.3	12133.6	8944.44	8830.52	8831.71
M302T285	[M+H]+	Pro-trp	0.612335	3.12778	0.00954607	302.171	284.55			Organic acids and derivatives	Carboxylic acids and derivatives	Amino acids, peptides, and analogues	1006.54	6836.52	9304.11	4753.36	583.366	743.795	7162.23	12758.7	7594.08	21213.5	10714.9	13207.7	7653.32	7655.76	7493.83
M320T212	(M+CH3CN+H)+	Pro-Tyr	0.18648	1.60101	0.247408	320.163	211.985						739.976	2163.66	2715.71	1176.22	714.134	477.811	1389.08	1013.02	925.553	4278.74	2175.77	3005.93	1014.69	1012.97	1048.83
M371T282	[M+H]+	Pro-Val-Arg	0.209183	1.13017	0.712694	371.228	281.891			Organic acids and derivatives	Carboxylic acids and derivatives	Amino acids, peptides, and analogues	5936.76	12127.5	10724.7	2027.59	6176.69	3936.66	2796.57	9606.79	4245.25	9149.27	6084.63	14375	8286.05	8283.14	8448.61
M285T228	[M+H]+	Promazine	0.126597	0.922839	0.75699	285.122	228.434	HMDB0014564	C07379	Organoheterocyclic compounds	Benzothiazines	Phenothiazines	3306.2	3540.42	1603.94	2983.69	2512	2204.82	1214.91	2292.48	1083.59	4927.48	2197	3189.38	3568.73	3722.34	4059.74
M307T414	(M+Na)+	Promethazine	0.107993	0.825183	0.440506	307.132	413.998	HMDB0015202	C07404	Organoheterocyclic compounds	Benzothiazines	Phenothiazines	1311.06	2547.37	1977.98	1811.64	1274.28	1136.11	505.198	779.28	1366.29	1686.72	1435.79	2526.77	1428.72	1336.96	1440.61
M493T458	[M+H]+	Propanoic acid, 2-[[4-[2-[[[(2,4-difluorophenyl)amino]carbonyl]heptylamino]ethyl]phenyl]thio]-2-methyl-	0.124182	1.13761	0.513607	493.229	457.866			Benzenoids	Benzene and substituted derivatives	N-phenylureas	882.323	1793.8	2255.11	2351.35	975.411	755.099	1695.82	1713.11	1347.07	1936.99	1714.4	1845.95	1401.38	1528.12	1527.53
M531T398	[M+H]+	Proscillaridin a	0.324484	1.53219	0.194316	531.287	397.611		C12816	Lipids and lipid-like molecules	Steroids and steroid derivatives	Steroid lactones	1189.71	8980.14	6792.25	6153.02	1261.92	1093.43	7568.5	8725.64	3534.54	7659.06	5031.5	6506.46	4697.11	4422.07	4432.47
M667T406	[M+Na]+	Prostaglandin a2-biotin	0.152766	1.11434	0.836235	667.365	406.293			Lipids and lipid-like molecules	Fatty Acyls	Eicosanoids	123.95	1769.94	3476.69	1197.8	180.523	141.207	655.147	1053.71	478.048	2448.48	1284.66	1757.87	1651.07	1646.53	1402.59
M563T437	[M+H]+	Protoporphyrin ix	0.172895	1.68303	0.0180629	563.278	436.838	HMDB0000241	C02191				721.851	1515.46	1471.18	1041.34	408.417	557.851	1366.63	1972.48	1824.35	1112.74	1715.09	1629.08	1013.51	1112.86	1005.04
M588T344	[M+H]+	Pseudojervine	0.376306	2.44116	0.0180658	588.371	344.133			Lipids and lipid-like molecules	Steroids and steroid derivatives	Steroidal glycosides	184.51	3249.95	5210.5	2655.19	403.914	214.624	4797.98	5319.56	2830.95	7065.31	4788.97	4292.71	2958.89	2901.32	2959.49
M337T366	[M+H]+	Psoralidin	0.538531	0.408984	0.0586007	337.11	365.83	HMDB0034050	C10523	Phenylpropanoids and polyketides	Isoflavonoids	Coumestans	7185.02	13231.3	6241.26	23534.5	6274.21	5756.89	4137.04	4101.12	4468.05	3851.1	4019.46	4871.55	7378.14	7103.19	7104.5
M170T106	[M+H]+	Pyridoxine	0.73649	0.486182	0.153375	170.08	106.061	HMDB0000239	C00314	Organoheterocyclic compounds	Pyridines and derivatives	Pyridoxines	13523.9	32389.1	4761.63	45927.6	15489.4	8993.65	1781.99	8655.6	8432.17	12224.2	12590.6	15185	9442.06	8505.58	9454.42
M566T463	[M+H-H2O]+	Pyripyropene a	0.121334	1.17847	0.61933	566.225	463.037			Lipids and lipid-like molecules	Steroids and steroid derivatives	Hydroxysteroids	510.15	1583.91	2385.4	974.271	539.832	401.283	1019.85	1740.62	844.551	1928.02	853.034	1150.07	1039.41	1072.84	1039.55
M414T358	[M+H]+	Pyroglu-Lys-Arg	0.467501	4.15323	0.0012492	414.27	358.147			Organic acids and derivatives	Carboxylic acids and derivatives	Amino acids, peptides, and analogues	592.267	2225.96	3748.21	1245.56	328.848	332.544	5345.37	8136.7	3932.83	8668.99	5063.03	4045.01	3962.75	4031.83	4031.24
M277T203	[M+H]+	Pyroglu-phe	0.207666	0.685129	0.153065	277.118	203.276			Organic acids and derivatives	Carboxylic acids and derivatives	Amino acids, peptides, and analogues	1680.13	4236.43	2682.16	4412.27	1960.87	1514.86	1814.3	1221.5	1438.15	2243.15	2184.53	2393.9	2085.93	1934.09	2089.05
M227T406	[M+H]+	Pyroglu-pro	0.786461	2.45475	0.0210815	227.102	405.519			Organic acids and derivatives	Carboxylic acids and derivatives	Amino acids, peptides, and analogues	6163.32	8254.8	24165.4	4105.7	6258.46	4707.17	18642.7	17487.8	9110.92	34462.5	24254.7	27750.7	16419.7	15931.7	15929.1
M187T406	[M+H]+	Pyroglutamylglycine	0.203157	1.07587	0.827762	187.07	405.836			Organic acids and derivatives	Carboxylic acids and derivatives	Amino acids, peptides, and analogues	1335.82	6365.68	7148.09	3752.4	1722.49	773.632	2539.17	2997.44	3591.27	5544.06	3493.7	4533.25	3547.08	3503.19	3485.03
M144T148	[M+H-H2O]+	Quinoline-2,4-diol	0.922235	2.03531	0.0213994	144.043	148.188		C16716	Organoheterocyclic compounds	Quinolines and derivatives	Quinolones and derivatives	8370.25	15753.2	43983.3	4099.27	9447.52	18447.5	30992.6	39536	27349	29475	33875.6	42508.3	27805.1	27389.4	25208
M343T287	[M+H-C3H6O2]+	Ramipril	0.618167	2.94418	0.0633225	343.197	286.538	HMDB0014324		Organic acids and derivatives	Carboxylic acids and derivatives	Amino acids, peptides, and analogues	938.703	5574.91	15977.8	3326.53	967.41	1006.42	6789.81	10370.8	5142.87	28708.5	11993.1	18819.1	9897.58	9894.58	10224.4
M337T434	[M+Na]+	Ranitidine	0.148186	0.917936	0.443329	337.142	434.088	HMDB0001930		Organic nitrogen compounds	Organonitrogen compounds	Amines	12778.5	14889	14085.4	15130	18281	10083.7	14975.5	10336.2	13065.1	10895.6	16385.9	12593.6	14524.5	14483.6	14524.1
M635T471	[M+H]+	Rescinnamine	0.177854	1.93802	0.000355	635.307	470.98		C06540				437.865	665.375	1124.15	594.799	454.406	489.698	1160.21	1336.93	1285.61	1147.69	1251.5	1117.2	1190.14	1157.94	1287.3
M609T37	[M+H]+	Reserpine	0.993979	0.369086	0.103827	609.27	36.78	HMDB0014351	C06539				24536.2	35487.2	74253.8	86921.2	13017.1	4357.08	14174	20525.8	25034.2	5048.17	9312.71	13959.1	24393.1	24046.8	18402.5
M455T251	[M+H]+	Resveratrol dimer	0.428957	0.584328	0.384269	455.152	250.964		C10289				1052.36	16326.4	6108.22	16073	1809.13	774.63	2034.64	1454.23	1473.11	7466.82	6424.86	5772.06	8460.05	8649.08	8650.84
M374T254	[M+Na]+	Retrorsine	0.232282	0.67391	0.0681249	374.138	254.152		C10364				2494.96	4545.22	1940.89	5427.95	3304.52	3707.18	2721.86	2181.59	1459.65	2404.98	2753.72	2913.83	1531.94	796.726	1544.31
M377T205	[M+H]+	Riboflavin	0.914824	0.222023	0.0432321	377.145	204.971	HMDB0000244	C00255	Organoheterocyclic compounds	Pteridines and derivatives	Alloxazines and isoalloxazines	35500	5633.97	6066.96	4882.46	36614	41853.8	4758.75	4946.1	3966.74	4580.16	5250.53	5483.14	13037.5	13125.7	12973.3
M741T290	[M+H]+	Robinin	0.269634	0.356077	0.00193796	741.224	289.616		C10178	Phenylpropanoids and polyketides	Flavonoids	Flavonoid glycosides	2086.56	2543.09	1542.51	3565.22	2724.73	1626.24	510.303	384.642	386.543	1331.97	1327.2	1075.89	1728.7	1711.53	1728.69
M511T317	[M+Na]+	Roccanin	0.269504	2.08281	0.000881269	511.253	317.284						1215.97	2141.16	1588.13	1202.46	1223.34	1038.09	2600.8	3015.86	1883.91	3975.01	2894.38	3144.69	2713.08	2657.72	2657.98
M411T231	[M+H]+	Rotenonic acid, methyl ether	0.169097	0.885124	0.707553	411.2	230.619			Phenylpropanoids and polyketides	Isoflavonoids	Rotenoids	843.02	3992.23	3877.87	3429.26	694.83	879.757	1985.35	1893.08	1820.94	2577.84	1651.86	2212.15	2407.44	2393.32	2422.2
M660T453	[M+NH4]+	Rubusoside	0.137488	1.07349	0.822521	660.356	452.812			Lipids and lipid-like molecules	Prenol lipids	Terpene glycosides	841.433	4095.47	2321.83	2335.45	737.633	740.638	2282.52	2658.24	1625.26	2379.9	1293.04	1647.2	1960.02	1909.22	1959.48
M385T372	[M+H]+	S-adenosyl-l-homocysteine	0.281335	1.72214	0.106133	385.128	372.372	HMDB0000939	C00021	Nucleosides, nucleotides, and analogues	5'-deoxyribonucleosides	5'-deoxy-5'-thionucleosides	520.433	4200.49	4310.38	3409.91	1296.17	690.499	4242.71	2675.14	2137.32	5835.22	6129.89	3826.52	3382.02	3673.28	3673.76
M399T453	[M+H]+	S-Adenosylmethionine	0.0950142	0.917633	0.518643	399.143	452.778	HMDB0001185	C00019	Nucleosides, nucleotides, and analogues	5'-deoxyribonucleosides	5'-deoxy-5'-thionucleosides	1929.17	3413.92	2394.19	2888.76	2931.04	2345.03	2271.35	1732.07	2298.76	2383.47	2354.43	3552.23	2336.78	2333.44	2148.47
M298T99	[M+H]+	S-methyl-5'-thioadenosine	0.909662	0.768409	0.396038	298.096	99.062	HMDB0001173	C00170	Nucleosides, nucleotides, and analogues	5'-deoxyribonucleosides	5'-deoxy-5'-thionucleosides	27414.4	94441.2	74694.9	92118.7	45460.7	20264	34462.9	25966.5	24911.9	68311.8	55595.4	63071	66437.9	66436.4	65876.9
M287T197	[M+H]+	Sakuranetin	0.254867	0.483252	0.19964	287.11	197.325	HMDB0030090	C09833	Phenylpropanoids and polyketides	Flavonoids	O-methylated flavonoids	2107.57	2490.88	1430.24	7635.11	1776.35	797.711	1090.4	1468.51	1313.35	1559.11	1449.15	966.451	2282.23	2265.45	2250.66
M567T321	[M+Na]+	Satratoxin g	0.190484	0.584823	0.0280436	567.217	321.384			Lipids and lipid-like molecules	Prenol lipids	Sesquiterpenoids	1838.04	3202.86	942.611	1969.39	2020.55	1870.39	1039.17	939.66	802.332	1657.83	1255.84	1231.71	1016.57	1016.37	1035.93
M303T417	(M+CH3CN+H)+	Ser-Arg	0.581958	2.01366	0.0365288	303.177	417.026						1568.65	15908.7	14441.5	7150.03	5634.32	3438.12	12182.6	18535.5	12697	18392.5	9627.67	25505.1	11338.6	11572.9	11007.5
M221T412	[M+H]+	Ser-Asp	0.159291	1.20701	0.306726	221.076	412.267			Organic acids and derivatives	Carboxylic acids and derivatives	Amino acids, peptides, and analogues	1064.48	3539.42	3532.67	2703.47	2257.12	1319.43	2932.04	2781.48	2398.09	3417.37	2607.93	3264.07	2872.65	2910.19	2906.57
M169T515	[M+2H]2+	Ser-Cys-Lys	0.239631	0.852827	0.515937	169.094	514.551			Organic acids and derivatives	Carboxylic acids and derivatives	Amino acids, peptides, and analogues	3966.07	20474.5	11207.4	11952.6	15880.6	8437.68	10052.2	9558.23	5048.77	11124.9	12635.6	12914.6	12098	11904.6	12097.7
M234T354	(M+H)+	Ser-Gln	0.293611	1.5714	0.193573	234.108	353.519						1864.58	6565.36	5342.44	4308.3	1419.15	1251.43	3414.63	4030.16	2659.29	9434.21	5386.17	7684.06	4619.71	4592.12	4592.12
M219T286	(M+H)+	Ser-Ile	0.14958	0.812361	0.0832371	219.134	285.57						3415.22	4283.36	3446.73	2381.62	2905.16	2887.75	2508.28	2360.3	2014.38	3145.5	2756.38	2909.85	3143.99	3023.06	3086.32
M375T253	[M+H]+	Ser-Ile-Arg	0.351851	1.81957	0.0464923	375.223	252.864			Organic acids and derivatives	Carboxylic acids and derivatives	Amino acids, peptides, and analogues	1392.24	6168.91	6969.39	3454.01	1244	1107.13	4676.63	4918.89	6778.7	8500.65	5387.11	6740.13	4842.58	4805.24	4804.87
M381T246	[M+H]+	Ser-Phe-Lys	0.312407	1.23525	0.513175	381.21	245.724			Organic acids and derivatives	Carboxylic acids and derivatives	Amino acids, peptides, and analogues	3651.01	16669.2	8210	11696.2	3404.89	3265.5	9365.42	4988.65	10576	16109.6	9509.62	7379.98	9406.92	9861.92	9443.8
M203T316	[M+H]+	Ser-Pro	0.224656	1.19829	0.378534	203.102	315.548			Organic acids and derivatives	Carboxylic acids and derivatives	Amino acids, peptides, and analogues	7115.04	7548.66	3977.63	3180.31	8712.84	6562.01	5999.85	5126.78	6126.01	6804.32	8586.2	11809	7753.83	7162.68	7752.09
M207T329	(M+H)+	Ser-Thr	0.257723	1.40631	0.313977	207.097	329.466						1670.85	5691.58	6112.97	4784.54	719.026	1566.56	3009.58	3514.83	2690.67	8194.08	5036.07	6448.04	4259.49	4069.88	4063.17
M292T246	[M+H]+	Ser-Trp	0.27477	1.29611	0.462493	292.129	246.49			Organic acids and derivatives	Carboxylic acids and derivatives	Amino acids, peptides, and analogues	3606.62	10240.8	9534.12	4823.61	4343.97	386.592	1355.3	8456.41	4636.24	10512.6	7030.11	10697.7	4757.65	4751.41	3531.9
M269T348	(M+H)+	Ser-Tyr	0.214823	1.63505	0.0263391	269.112	347.594						1600.99	2296.33	2335.14	2126.58	1777.66	1500.45	2045.58	3820.83	2752.48	3785.45	1936.4	4686.61	2422.56	2422.42	2472.04
M205T367	(M+H)+	Ser-Val	0.268511	0.765518	0.502023	205.118	366.602						7065.05	8703.29	9717.22	12605.3	3087.33	1922.78	1406.15	8518.95	10576	1795.25	9056.32	1641.94	3555.25	7605.38	7622.7
M361T374_2	[M+H]+	Ser-Val-Arg	0.489384	1.72098	0.0732921	361.219	374.078			Organic acids and derivatives	Carboxylic acids and derivatives	Amino acids, peptides, and analogues	1581.82	9284.72	15555.7	5687.29	12214.4	973.057	14400.2	16448.1	9784.69	16537.5	9880.71	10904	9361.38	9460.37	9369.44
M475T448	[M+H]+	Sildenafil	0.219411	1.24849	0.474002	475.226	447.928	HMDB0005039	C07259	Benzenoids	Benzene and substituted derivatives	Benzenesulfonamides	1317.76	4985.02	6026.37	3935.67	1399.09	1205.21	3669.98	3648.85	1928.89	5734.03	3068.74	5507.44	3329.35	3357.23	3357.14
M518T446	[M+Na]+	Silodosin	0.231514	2.04861	0.0167926	518.218	445.667			Organoheterocyclic compounds	Indoles and derivatives	Indolecarboxylic acids and derivatives	1766.59	1991.78	635.564	1067.11	1473.85	1743.34	2044.55	4327.27	1394.85	2628.24	3069.12	4314.3	2123.25	2497.94	2091.91
M937T356	[M+H]+	Soyasapogenol b base + o-ddmp, o-hexa-hexa	0.299116	2.9905	0.00105807	937.485	356.444			Lipids and lipid-like molecules	Prenol lipids	Terpene glycosides	428.754	1411.18	1666.66	806.445	474.561	542.784	3672.59	3401.74	2975.54	2028.93	1872.52	1989.15	1913.03	1710.87	1714.34
M942T440	[M+H]+	Soyasapogenol e base + o-hexa-hex-dhex	0.200561	2.45226	0.00802807	941.504	440.092	HMDB0039331		Lipids and lipid-like molecules	Prenol lipids	Terpene glycosides	91.6907	1093.69	1271.29	660.282	57.0529	168.031	1329.5	1608.6	878.753	1331.77	1643.38	1403.53	1098.44	1179.2	1177.71
M302T125	(M+H)+	Sphinganine	0.704859	0.382351	0.0687377	302.305	124.544	HMDB0000269	C00836	Organic nitrogen compounds	Organonitrogen compounds	Amines	8036.13	28817.4	14552.7	34421	6935.8	6745.92	3234.01	6014.57	4835.08	7234.12	7619.52	9109.98	11666.5	12005.9	11666
M732T144	(M+H)+	Sphingomyelin (d18:1/18:0)	0.858793	1.11277	0.310178	731.605	144.228	HMDB0001348/HMDB0010168/HMDB0010169/HMDB0011698/HMDB0011699/HMDB0012084/HMDB0012085/HMDB0012087/HMDB0012088/HMDB0012089/HMDB0012090/HMDB0012091/HMDB0012092/HMDB0012093/HMDB0012094/HMDB0012095/HMDB0012096/HMDB0012100/HMDB0012101/HMDB0012102/HMDB0012103/HMDB0012104/HMDB0012105/HMDB0012107/HMDB0013461/HMDB0013462/HMDB0013463/HMDB0013464/HMDB0013465/HMDB0013466/HMDB0013467/HMDB0013468/HMDB0013469	C00550	Lipids and lipid-like molecules	Sphingolipids	Phosphosphingolipids	135680	101689	100339	75968.1	123018	137376	98737	126195	142936	116386	141134	124698	112758	111291	111292
M144T346	[M+H]+	Stachydrine	0.279138	0.422787	0.100563	144.101	346.067	HMDB0004827	C10172	Organic acids and derivatives	Carboxylic acids and derivatives	Amino acids, peptides, and analogues	1753.28	1711.15	4277.5	9919.49	5491.06	1860.03	2341.26	1893.06	2014.56	1371.29	1872.03	1082.76	3453.82	3453.9	3500.44
M684T482	(M+NH4)+	Stachyose	0.1351	0.968332	0.795895	684.255	481.746	HMDB0003553	C01613	Organic oxygen compounds	Organooxygen compounds	Carbohydrates and carbohydrate conjugates	6540.08	9114.85	9002.94	7405.54	6187.96	6284.03	7284.5	10415.4	5764.44	5962.09	7262.02	6436.65	7528.24	7342.25	7344.02
M467T341	[M+H]+	Staurosporine	0.152253	1.14027	0.669166	467.212	340.913		C02079	Organoheterocyclic compounds	Indoles and derivatives	Carbazoles	788.752	3713.64	2377.05	2638.84	636.099	472.648	2080.7	1648.02	1607.35	2656.2	2102.6	2022.83	1791.87	2284.61	1531.7
M582T289	[M+H]+	Streptomycin a	0.12233	1.08402	0.460915	582.272	289.046	HMDB0015214	C00413	Organic oxygen compounds	Organooxygen compounds	Carbohydrates and carbohydrate conjugates	5173.83	4332.95	5227.11	4319.48	7374.07	4758.08	6904.88	5266.7	4802.72	5547.97	4997.34	6286	8762.24	8345.5	11671.7
M157T130	[M+H-H2O]+	Suberic acid	0.94476	1.10396	0.826814	157.096	129.688	HMDB0000893	C08278	Lipids and lipid-like molecules	Fatty Acyls	Fatty acids and conjugates	62166.3	59711.9	74318	38310.3	74507	89597	13361.1	12433.9	12386.5	77935.1	168929	155004	70991.5	71888	71887.7
M717T420	[M+H]+	Subsessiline	0.222038	1.54351	0.198642	717.374	419.943						472.876	3575.14	4049.52	1561.5	504.484	317.942	2744.39	2848.54	2429.51	3123.21	2654.25	2378.39	2887.74	2810.37	2888.69
M786T355	[M+H-H2O]+	Tacrolimus	0.113608	1.38593	0.482177	786.471	354.833	HMDB0015002	C01375				178.185	1775.97	1476.88	327.943	61.3527	17.742	610.461	1325.24	657.453	848.298	1138.87	738.978	916.466	913.619	997.299
M317T25	[M+H]+	Tamarixetin	0.0938345	0.796138	0.109241	317.065	24.682		C10188	Phenylpropanoids and polyketides	Flavonoids	Flavones	1106.9	745.169	733.863	691.163	1354.67	1083.29	769.448	761.464	803.921	716.202	744.122	754.816	422.374	450.79	422.106
M394T244_2	(M+Na)+	Tamoxifen	0.17928	1.35673	0.194466	394.216	244.245	HMDB0014813	C07108	Phenylpropanoids and polyketides	Stilbenes		1840.06	3865.53	3771.87	1281	2688.12	1667.26	4548.31	3045.1	1536.08	4613.79	3413.84	3348.2	3839.87	3840.88	3996.55
M173T46	[M+H-C6H15N3]+	Tegaserod	0.369902	0.88625	0.428336	173.085	45.774			Organoheterocyclic compounds	Indoles and derivatives	Indoles	30180.9	33546.4	36241.3	48146	25011.8	33222.2	18064.8	32995	22731.7	38518.1	39869.7	30697	29879.3	29872.4	28771.3
M702T212	[M+Na]+	Telaprevir (vx-950)	0.16983	0.911904	0.859144	702.417	211.59			Organic acids and derivatives	Peptidomimetics	Hybrid peptides	246.36	3838.77	2544.19	2495	114.407	166.841	743.052	1045.52	377.99	2936.19	1363.9	2110.33	1214.21	1524.84	1234.96
M515T451	[M+H]+	Telmisartan	0.154162	1.40491	0.134347	515.257	451.086	HMDB0015101	C07710	Benzenoids	Benzene and substituted derivatives	Biphenyls and derivatives	801.333	2075.71	2168.39	1343.37	774.549	735.638	1164.02	2481.18	1792.41	1704.25	2185.83	1769.71	1690.42	1688.89	1787.08
M313T32	[M+H-H2O]+	Teprenone	0.775738	0.785611	0.1667	313.273	31.934		C13297	Lipids and lipid-like molecules	Prenol lipids	Diterpenoids	94869	60250.6	59437.6	38509.7	64303.9	71013.8	53231.9	68188.5	26920.2	48213.8	52813	55752	63565.5	63557.7	61047.3
M623T353	[M+H]+	Tetrandrine	0.286111	1.9348	0.0111166	623.313	353.049		C09654				979.98	3641.05	2647.75	1850.18	1595.01	701.356	3359.22	4690.59	2153.55	4286.73	3726.16	3870.07	2170.84	2170.26	2114.98
M623T59	[M+H]+	Thalsimidine	0.446781	0.43873	0.000856797	623.286	59.301						7886.75	9325.45	9991.03	7553.25	5565.65	4854.26	2641.03	4186.7	4147.49	3123.17	3753.93	1967.93	4490.36	4222.41	4915.16
M219T318	(M-H+2Na)+	Theanine	0.389533	0.379074	0.212134	219.067	318.144						1767.99	11936.2	751.288	11389.5	1715.7	1189.01	827.166	3144.11	3482.81	854.254	1257.03	1332.88	1057.78	1116.97	1071.29
M265T333	[M]+	Thiamine	0.664619	0.343687	0.138952	265.111	332.897	HMDB0000235	C00378	Organoheterocyclic compounds	Diazines	Pyrimidines and pyrimidine derivatives	878.948	18236.6	6514.51	41876.5	19586.7	3957.09	5298.07	4751.14	3792.56	5520.68	5402.11	6528.21	9671.64	9660.6	9332.32
M803T134	(M-2H+3Na)+	Thioetheramide-PC	0.629382	0.891445	0.545203	802.537	134.171						180740	348312	309226	161655	189452	157901	214545	115295	253574	183545	229529	204544	222331	221244	222330
M191T63	[M+H]+	Thr-Ala	0.493026	0.554867	0.204124	191.103	62.657			Organic acids and derivatives	Carboxylic acids and derivatives	Amino acids, peptides, and analogues	4528.19	25520	21593	26647.5	15858.7	4680.26	2286.73	15097.2	13791.7	1258.66	21332.3	1069.59	8690.02	9092.29	9087.95
M319T416	[M+H]+	Thr-Ala-Lys	0.509052	2.4004	0.00131773	319.197	415.684			Organic acids and derivatives	Carboxylic acids and derivatives	Amino acids, peptides, and analogues	1237.96	4494.85	6281.83	6109.65	1787.99	1599.32	7876.85	9652.49	5888.2	10042.5	9417.74	8758.69	6762.62	6761.94	6615.98
M276T392	[M+H]+	Thr-Arg	0.635152	2.08107	0.0438709	276.166	392.471			Organic acids and derivatives	Carboxylic acids and derivatives	Amino acids, peptides, and analogues	2992.87	11226.4	22437.4	9457.86	828.053	2715.45	15595.8	10945.6	16368.8	24505.6	14082.4	21843.8	11586.7	11522.9	11204.3
M305T431	[M+H]+	Thr-Gly-Lys	0.279514	1.69935	0.0892784	305.182	431.163			Organic acids and derivatives	Carboxylic acids and derivatives	Amino acids, peptides, and analogues	1010.75	3734.36	5295.4	2492.57	1125.65	1090.5	2788.97	4519.75	4162.94	5156.31	6036.55	2399.56	3856.92	3738.2	3725.61
M257T362	[M+H]+	Thr-His	0.104921	1.16452	0.309531	257.124	361.808			Organic acids and derivatives	Carboxylic acids and derivatives	Amino acids, peptides, and analogues	1881.62	3143.9	2457.43	2200.57	1526.35	1724.96	1557.45	2717.34	2531.15	3168.11	2244.23	2844.59	2271.56	2234.6	2271.62
M248T410	[M+H]+	Thr-Lys	0.296856	1.39081	0.371136	248.16	409.63			Organic acids and derivatives	Carboxylic acids and derivatives	Amino acids, peptides, and analogues	3937.05	19347.9	8807.41	4229.88	2424.22	2255.1	8902.42	9821.28	6391.66	13576.8	9867.1	8466.09	7407.03	6995.3	7406.05
M404T500	[M+H]+	Thr-Lys-Arg	0.164568	1.65368	8.0531e-05	404.249	500.131			Organic acids and derivatives	Carboxylic acids and derivatives	Amino acids, peptides, and analogues	743.894	894.883	929.349	850.447	644.224	709.324	1336.48	1480.59	1213.16	1406.88	1418.87	1035.61	1063.97	1043.65	1044.36
M379T286	[M+H]+	Thr-Met-Lys	0.177613	1.31125	0.382063	379.195	285.849			Organic acids and derivatives	Carboxylic acids and derivatives	Amino acids, peptides, and analogues	540.042	2894.83	3293.65	2524.26	738.247	595.469	1740.42	2070.24	1662.76	3390	1932.87	3085.23	2491.55	2491.25	2516.38
M373T353	[M+H]+	Thr-Pro-Arg	0.203641	1.93086	0.0182882	373.232	353.461			Organic acids and derivatives	Carboxylic acids and derivatives	Amino acids, peptides, and analogues	1326.03	1533.88	697.416	1064.26	1343.73	803.448	2339.64	3521.24	2285.19	884.23	1844.95	2194.33	751.681	872.883	764.591
M349T414	[M+H]+	Thr-Thr-Lys	0.268463	2.54451	2.41687e-05	349.207	413.541			Organic acids and derivatives	Carboxylic acids and derivatives	Amino acids, peptides, and analogues	745.689	1184.75	1118.15	1054.43	718.428	622.816	2420.53	2682.07	1797.01	2825.07	2087.14	2041.15	2054.92	1779.88	1777.91
M1057T195	[M+Na]+	Tomatine	0.155208	1.43701	0.41445	1056.53	194.76		C10827	Lipids and lipid-like molecules	Steroids and steroid derivatives	Steroidal glycosides	137.32	3240.23	2250.67	782.873	133.104	67.9402	1614.64	1808.97	1814.01	1798.58	1599.33	866.171	2055.89	2057.84	2294.93
M147T289	(M+H-H2O)+	trans-3-Coumaric acid	0.533532	0.843738	0.529039	147.043	289.02						33477.5	18467.4	20865.8	20551.3	43166.2	24542.7	18118.4	11967.8	8384.03	27235.2	42552.2	27644.1	24656	24780.4	24655.8
M209T176	[M+H]+	Trans-3,5-dimethoxy-4-hydroxycinnamaldehyde	0.735467	0.104782	3.59536e-05	209.08	175.82		C05610	Benzenoids	Phenols	Methoxyphenols	17695.9	10618	6896.4	12221.2	13309.3	10395.5	792.408	761.38	1655.36	2705.08	207.842	1331.76	7983.29	7819.72	7980.85
M193T49_1	[M+H]+	Trans-3'-hydroxycotinine	0.335173	0.878443	0.534386	193.096	48.719			Organoheterocyclic compounds	Pyridines and derivatives	Pyrrolidinylpyridines	10494.4	24017.8	10956.6	19540.6	11326.8	8663.93	8907.96	12009.8	12012.7	12494.1	16109.5	13133.7	10575.3	10342.9	10335.7
M192T441	(M+NH4)+	trans-Aconitic acid	0.522402	0.331875	0.00140433	192.05	441.013	HMDB0000958	C02341	Organic acids and derivatives	Carboxylic acids and derivatives	Tricarboxylic acids and derivatives	11147.9	7397.7	3764.61	9889.7	9453.95	7514.79	1406.2	1703.81	968.678	5097.96	3175.34	3965.88	5390.2	5418.69	5418.8
M149T247	[M+H]+	Trans-cinnamic acid	0.861182	0.731496	0.243074	149.059	247.252	HMDB0000930	C00423	Phenylpropanoids and polyketides	Cinnamic acids and derivatives	Cinnamic acids	48013.2	69216.1	77688.9	58222.6	87422.2	30290.8	30082.8	24496.7	14888.1	61044.4	62844.2	77921.9	56171	56374.9	56148.7
M265T102	(M+H-H2O)+	trans-Vaccenic acid	0.379068	1.32186	0.602011	265.252	102.302	HMDB0003231	C08367	Lipids and lipid-like molecules	Fatty Acyls	Fatty acids and conjugates	11438.9	9246.08	40184.7	11150.9	9555.46	11312	49680.9	2412.44	15071.9	38500.4	11261.2	5858.16	9753.66	10717.8	9813.67
M220T113	[M+H]+	Trans-zeatin	0.547036	0.448197	0.195538	220.118	112.909	HMDB0012204	C00371	Organoheterocyclic compounds	Imidazopyrimidines	Purines and purine derivatives	1914.57	21697.3	5993.19	24450.4	5922.57	2199.34	4585.71	2570.54	5136.12	5539.66	4551.59	5484.12	2047.26	2920.86	3283
M251T425	[M+H-C3H5Cl]+	Tri(3-chloropropyl) phosphate	0.11496	1.01978	0.829968	250.998	424.795			Organic acids and derivatives	Organic phosphoric acids and derivatives	Phosphate esters	6800.19	5397.67	6924.79	5715.28	4379.03	6874.22	6940.14	5434.82	6275.53	6698.48	6622.64	4833.36	7108.04	6876.26	6880.3
M339T407	[M+H-C3H9FO2]+	Triamcinolone acetonide	0.250786	0.427882	0.0117039	339.155	406.99		C08183	Lipids and lipid-like molecules	Steroids and steroid derivatives	Hydroxysteroids	2931.62	3142.84	1451.28	2864.2	3917.76	1253.67	276.197	959.213	804.052	1917.78	1185.53	1515.65	1733.75	1762.03	1761.7
M479T345	[M+H]+	Triamcinolone diacetate	0.230212	1.85264	0.0220991	479.221	345.413	HMDB0139638	C08184	Lipids and lipid-like molecules	Steroids and steroid derivatives	Pregnane steroids	559.26	1413.42	2766.84	1084.02	777.959	682.932	2140.84	2263.12	1427.9	2667.92	2361.48	2634.2	4000.05	3212.77	3390.37
M665T391	[2M+H]+	Trichothecine	0.153525	1.09616	0.727343	665.347	390.645		C09742	Lipids and lipid-like molecules	Prenol lipids	Sesquiterpenoids	1287.52	2615.36	5289.24	2909.47	1193.65	1338.88	2862.79	2158.9	2878.58	2708.79	2817.15	2615.08	1563.03	1635.83	1557.91
M331T45	[M+H]+	Tricin	0.989508	1.34543	0.278539	331.081	44.809	HMDB0124861	C10193	Phenylpropanoids and polyketides	Flavonoids	O-methylated flavonoids	32932.4	49938.7	78441.1	102487	48762	30470	85224.5	128367	77786.4	78363.6	32892.5	58890.3	69683.3	69690.3	72238
M213T228	(M+CH3CN+Na)+	Triethanolamine	0.24853	0.530646	0.049389	213.123	227.54	HMDB0032538	C06771	Organic nitrogen compounds	Organonitrogen compounds	Amines	2033.51	4720.59	2201.53	4408.79	1703.26	1687.13	1186.03	1235.44	1395	2164.34	1339.56	1570.48	1657	1667.59	1751.06
M367T25	[M+H-3H2O]+	Trihydroxycoprostane	0.413665	0.654409	0.103297	367.335	25.385	HMDB0001457	C05454	Lipids and lipid-like molecules	Steroids and steroid derivatives	Cholestane steroids	11299.7	13424.9	5549.14	8393.73	14750.2	19614.8	7181.92	12371.1	4425.98	5844.31	10320.7	7649.16	12525	12517.1	13402.8
M60T257	[M+H]+	Trimethylamine	0.370685	0.761725	0.20052	60.0802	257.298	HMDB0000906	C00565	Organic nitrogen compounds	Organonitrogen compounds	Amines	7346.46	15751	10039.5	18038.8	7336	7840.79	8453.86	8437.24	7537.57	8942.19	8470.32	8701.15	10596.9	10456.9	10595.1
M76T321	[M+H]+	Trimethylamine n-oxide	0.322322	0.885047	0.207092	76.0751	321.131	HMDB0000925	C01104	Organic nitrogen compounds	Organonitrogen compounds	Aminoxides	18079.4	18486.2	14110	18400.5	22230.9	21341.9	20794.7	14744.4	17400	13564.6	15033.4	18162.6	15743.8	15727.2	15313.1
M327T424	[M+H]+	Tris(1-chloro-2-propyl) phosphate	0.300094	0.91151	0.441316	327.023	423.553			Organic acids and derivatives	Organic phosphoric acids and derivatives	Phosphate esters	21393	13359.7	16467.9	9698.38	15832.4	17054.8	14818.8	12590.7	14096.8	12213.6	16314.1	15471.3	15226.6	15388.3	15387.8
M737T286	[2M+H]+	Tritolyl phosphate	0.159632	0.231359	0.0927024	737.226	286.13			Organic acids and derivatives	Organic phosphoric acids and derivatives	Phosphate esters	243.586	1311.61	487.097	1719.86	122.849	167.893	98.6117	75.6807	61.7541	111.123	274.948	315.555	668.717	605.099	605.208
M489T448	[M+H]+	Trp-Gln-Arg	0.147208	1.15732	0.62743	489.242	448.304			Organic acids and derivatives	Carboxylic acids and derivatives	Amino acids, peptides, and analogues	1175.92	4562.23	3533.56	2138.61	1026.67	1168.13	2969.22	2878.83	765.252	2746.51	2967.08	3418.54	2706.91	2704.22	2777.88
M352T234	[M+H]+	Trp-Phe	0.636308	3.78992	0.0144074	352.186	234.349			Organic acids and derivatives	Carboxylic acids and derivatives	Amino acids, peptides, and analogues	1126.03	6000.89	6163.6	3765.94	1127.84	980.612	15889.6	24282.3	9076.16	10835	6971.69	5578.71	5172.71	5189.4	5073.19
M432T364	[M+H]+	Trp-Val-Lys	0.519801	2.97735	1.02636e-05	432.281	364.308			Organic acids and derivatives	Carboxylic acids and derivatives	Amino acids, peptides, and analogues	1757.75	4861.34	2538.51	3092.81	2103.06	1806.76	9955.02	8347.19	8028.16	7740.03	6834.03	7210.24	5398.76	6211.38	5367.77
M338T337	(M+H)+	Tyr-Arg	0.430744	1.84266	0.0513266	338.182	337.108						2787.27	5245.49	11719.1	3646.26	1013.98	2649.8	5996.93	11042	6841.15	8631.13	7883.86	9470.9	7106.47	6811.65	7107.67
M466T471	[M+H]+	Tyr-Gln-Arg	0.0863596	0.936476	0.779308	466.218	471.275			Organic acids and derivatives	Carboxylic acids and derivatives	Amino acids, peptides, and analogues	1103.78	2068.23	2152.54	1527.32	924.51	1049.92	1907.39	1955.27	1224.48	724.753	671.796	1781.93	1447.58	1528.56	1527.35
M311T369	(M+H)+	Tyr-Glu	0.571277	1.06421	0.750172	311.124	368.612						59956	28859.7	36108.5	16243	38861.3	54746.3	37835.9	36199.7	33499.2	36609.2	58536.7	47170	37861.9	38326.4	37862.3
M239T273	[M+H]+	Tyr-Gly	0.149751	0.977296	0.932285	239.102	272.536			Organic acids and derivatives	Carboxylic acids and derivatives	Amino acids, peptides, and analogues	928.388	4243.41	3085.9	4001.37	902.995	1918.58	2332.49	1316.01	2516.8	2881.99	2659.14	3031.82	2474.55	2373.18	2354.51
M317T368	(M+Na)+	Tyr-Ile	0.232745	1.67634	0.0607481	317.145	367.909						1913.31	2666.45	3097.56	2277.4	1742.79	1243.6	4032.98	3572.77	1539.61	4005.09	2458.06	6085.25	3412.29	3110.97	3103.43
M348T445	(M+K)+	Tyr-Lys	0.276429	0.687797	0.293352	348.14	444.962						2342.18	8690.25	6495.95	6690.8	2104.9	1639.11	2323.83	2484.42	1856.84	3949.54	3691.34	4927.02	4061.01	3956.14	4074.03
M283T252	(M+H)+	Tyr-Thr	0.297151	1.35837	0.20851	283.129	251.586						3417.05	7984.34	8402.44	5759.41	3118.75	2252.85	6310.81	5536.14	4320.79	9354.04	6890.16	9608.9	6599.58	6617	6616.95
M345T217	[M+H]+	Tyr-Tyr	0.139871	1.21618	0.236405	345.144	216.534			Organic acids and derivatives	Carboxylic acids and derivatives	Amino acids, peptides, and analogues	1617.15	2671.01	2845.7	2190.7	1407.45	1390.34	2000.46	2071.04	1916.32	3326.52	2721.59	2707.08	2164.64	2164.78	2132.22
M138T212	[M+H]+	Tyramine	0.533816	0.314269	0.12342	138.09	212.256	HMDB0000306	C00483	Benzenoids	Benzene and substituted derivatives	Phenethylamines	2475.22	16859.2	3360.51	20434.8	2713.9	3658.3	2102.01	1552.69	1469.06	4774.48	2478.68	3180.02	4964.98	4970.16	5113.79
M584T438	(M+NH4)+	UDP-D-Galactose	0.572728	0.620695	0.0298566	584.088	437.542	HMDB0000302/HMDB0062573	C00052	Nucleosides, nucleotides, and analogues	Pyrimidine nucleotides	Pyrimidine nucleotide sugars	25340.3	10780.2	14372.4	13413.1	23695.1	20602.7	11563.9	8730.26	7800.57	10729.4	12717.9	15619.4	14536.1	14861.7	14861.2
M61T351	[M+H]+	Urea	0.320815	1.4799	0.0431356	61.0391	351.182	HMDB0000294	C00086	Organic acids and derivatives	Organic carbonic acids and derivatives	Ureas	7675.32	7660.57	5930.16	5096.45	7281.14	5990.54	14470.8	4935.17	11492.8	8396.83	9474.02	9885.1	8728.83	8728.79	8747.24
M245T158	[M+H]+	Uridine	0.419968	0.890564	0.303711	245.076	157.56	HMDB0000296	C00299	Nucleosides, nucleotides, and analogues	Pyrimidine nucleosides		30353.5	48106.4	41297.5	41923.7	30642.3	25684.2	30147.3	31316.9	33114.7	30067.5	36199.9	33303.5	33953.6	34236.4	34235.4
M405T438	(M+H)+	Uridine 5'-diphosphate (UDP)	0.547278	0.687313	0.0204142	405.009	437.538	HMDB0000295	C00015	Nucleosides, nucleotides, and analogues	Pyrimidine nucleotides	Pyrimidine ribonucleotides	26621.9	16035.9	16101.5	16705.5	24104.5	21342.8	15273	9690.29	12529	11016.7	17685.1	16910.6	15643.2	15750.9	15751.3
M325T408	(M+H)+	Uridine 5'-monophosphate (UMP)	0.160994	0.8498	0.375679	325.043	408.018	HMDB0000288	C00105	Nucleosides, nucleotides, and analogues	Pyrimidine nucleotides	Pyrimidine ribonucleotides	4692.98	3023.19	2828.16	1972.81	4934.91	4004.73	2111.56	3019.63	3162.91	3539.18	2156.91	4243.79	3505.42	3505.39	3511.51
M139T175	[M+H]+	Urocanate	0.534156	0.160475	0.0300289	139.049	175.222	HMDB0000301	C00785	Organoheterocyclic compounds	Azoles	Imidazoles	4267.46	8816.34	3120.07	18947.5	5528.17	3814.39	1754.34	1754.34	1028.9	197.682	1754.34	650.566	1614.45	1614.69	1540.93
M233T378	[M+H]+	Val-Asp	0.286886	0.704206	0.14306	233.113	377.522			Organic acids and derivatives	Carboxylic acids and derivatives	Amino acids, peptides, and analogues	9921.91	10250.9	8763.24	6804.87	3262.45	6405.65	4876.5	8598	7573.04	3112.4	3878.41	3938.98	5872.69	5301.59	5875.35
M231T192	[M+H]+	Val-Ile	1.42239	0.574943	0.383641	231.17	192.287			Organic acids and derivatives	Carboxylic acids and derivatives	Amino acids, peptides, and analogues	5423.56	196612	85228.7	171051	7553.76	5843.54	28174.4	35287.5	32636	82658.2	36563.2	55889	55595.5	55595.2	55163.7
M387T203	[M+H]+	Val-Leu-Arg	0.514072	1.08389	0.884245	387.26	202.548			Organic acids and derivatives	Carboxylic acids and derivatives	Amino acids, peptides, and analogues	1843.92	19807.6	42766.5	7778.6	979.622	971.561	8745.73	13307.7	10932	20112.4	12738.4	14531.6	10591.2	10591.5	10756.5
M246T366	(M+H)+	Val-Lys	0.45473	1.68944	0.0493933	246.181	365.623						2792.66	9214.8	11224.7	9169.02	3184.96	2679.6	8519.67	10928.5	9127.75	16260.5	9360.4	10450.8	8335.05	8145.49	8335.22
M249T200	[M+H]+	Val-met	0.160067	1.32466	0.435345	249.125	200.21			Organic acids and derivatives	Carboxylic acids and derivatives	Amino acids, peptides, and analogues	2234.38	2019.25	2540.76	1632.56	2791.14	1638.82	1336.31	1738.96	1331.84	6345.83	1987.58	4290.47	1126.96	1195.96	1192.43
M247T340_2	(M+H-H2O)+	Val-Phe	0.328837	1.16458	0.853953	247.14	339.63						5014.24	57769.4	3334.14	1594.78	3243.65	2671.47	4588.95	8550.97	8648.88	39364.2	3825.53	20766.7	3487.12	3487.21	3501.06
M215T321	[M+H]+	Val-Pro	0.304432	0.800615	0.386984	215.138	321.104			Organic acids and derivatives	Carboxylic acids and derivatives	Amino acids, peptides, and analogues	6010.99	13680.3	13624	11875.4	10236.2	4210.13	6220	4526.03	4578.3	13787.1	8844	9790.96	8998.09	9576.77	8991.67
M265T206	(M+CH3COO+2H)+	Val-Ser	0.28774	0.439381	0.0430935	265.143	206.329						3931.93	7117.44	1983.86	3852.26	1973.93	1975.2	1358.26	1291.6	1294.67	2151.72	1122.78	1935.3	1759.1	1763.88	1704.63
M304T189	[M+H]+	Val-Trp	0.390482	0.858927	0.779228	304.165	189.049			Organic acids and derivatives	Carboxylic acids and derivatives	Amino acids, peptides, and analogues	410.15	17938.6	11737.1	13799.3	255.485	109.973	2200.12	4547.51	3123.78	11005.2	6938.55	10192.9	6703.24	5431.7	6714.96
M281T213	(M+H)+	Val-Tyr	0.491075	1.75865	0.123276	281.149	213.409						2110.31	10775.1	13868.4	10649.8	2134.98	1300.44	6928.47	9449.84	7147.41	19206	12651.7	16437.8	9514.09	9583.73	9513.67
M217T206	[M+H]+	Val-Val	0.498979	0.853166	0.767188	217.154	206.45			Organic acids and derivatives	Carboxylic acids and derivatives	Amino acids, peptides, and analogues	941.503	35460.7	19551.5	21881.1	1989.02	1010.92	6022.07	8268.19	5568.03	22715.6	9596.63	16794.9	12537.6	12521	12521
M373T322	[M+H]+	Val-Val-Arg	0.487508	2.01272	0.0304649	373.255	322.41			Organic acids and derivatives	Carboxylic acids and derivatives	Amino acids, peptides, and analogues	936.983	10624.4	9513.32	5513.12	1552.76	1749	10582.7	11924.1	6600.97	13311.3	9016.1	8724.07	7703.11	7899.22	7899.01
M345T337	[M+H]+	Val-Val-Lys	0.458824	2.9061	0.00292323	345.249	337.107			Organic acids and derivatives	Carboxylic acids and derivatives	Amino acids, peptides, and analogues	1100.22	4691.04	2023.74	4509.47	934.003	925.381	6759.15	8929.57	4772.01	9554.33	7177.83	4026.85	4685.5	4685.61	4510.49
M514T251	[M+Na]+	Valine conjugated chenodeoxycholic acid	0.414732	2.94982	0.00316231	514.37	250.974			Lipids and lipid-like molecules	Steroids and steroid derivatives	Bile acids, alcohols and derivatives	457.549	1477.75	5510.8	451.095	1817.52	542.542	4433.38	5144.26	5941.09	5450.45	5559.07	3728.75	3716.94	3717.56	3800.6
M556T417	[M+2H]2+	Valinomycin	0.338075	2.54712	2.52789e-05	556.319	417.363		C06684	Organic acids and derivatives	Peptidomimetics	Depsipeptides	1111.87	1409.47	1993.33	1773.82	1135.06	1196.18	4027.87	4301.15	2774.5	4192.35	2974.86	3684.74	2133.59	1720.26	2136.32
M408T313	[M+H-N2]+	Valsartan	0.236239	1.40405	0.382118	408.213	313.309	HMDB0014323		Organic acids and derivatives	Carboxylic acids and derivatives	Amino acids, peptides, and analogues	1118.86	3301.68	6628.11	1830.99	1244.46	867.788	1947.05	2992.7	1680.8	4180.08	4582.1	5666.66	3120.67	3223.74	3106.41
M772T382_4	[M+Na]+	Venturicidin a	0.182167	1.77158	0.107554	772.455	382.347			Lipids and lipid-like molecules	Prenol lipids	Terpene lactones	520.144	2009.74	1930.55	1133.53	372.393	436.075	1779.92	3539.73	1084.68	1527.11	1473.5	1937.52	1992.94	2028.41	2028.61
M719T481	[M+H]+	Verteporfin (visudyne)	0.11827	1.42073	0.141821	719.296	481.002			Organoheterocyclic compounds	Tetrapyrroles and derivatives	Chlorins	674.951	1856.89	980.419	906.418	578.346	511.533	1444.93	1291.01	1563.39	816.434	1674.77	1035.64	1129.93	1132.08	974.802
M754T406_2	[M+H]+	Vindesine	0.322656	2.94677	0.000385181	754.409	406.139	HMDB0014454					441.099	1835.31	1781.82	1052.95	722.551	426.733	2196.42	2941.86	2416.34	3729.48	3996.6	3167.44	2512.03	2449.59	2449.94
M206T207	[M+H]+	Xanthurenic acid	0.15548	0.910516	0.555877	206.044	206.944	HMDB0000881	C02470	Organoheterocyclic compounds	Quinolines and derivatives	Quinoline carboxylic acids	3675.64	3299.72	2897.17	2302.73	4994.94	5250.77	3403.24	3666.21	2404.47	2848.4	4020.37	4071.95	3437.9	3545.7	3435.28
M379T227	[M+Na]+	xi-3-Hydroxy-5-phenylpentanoic acid O-beta-D-Glucopyranoside	0.172246	0.911008	0.799558	379.156	227.424	HMDB0031695		Lipids and lipid-like molecules	Fatty Acyls	Fatty acyl glycosides	1200.84	3484.04	6178.66	3262.42	1901.72	1064.26	3208.36	3868.7	2918.67	874.555	3884.65	815.96	1837.06	1631.48	1849.66
M660T445	[M+H]+	Yunaconitine	0.306998	2.66942	0.000636918	660.33	445.055			Lipids and lipid-like molecules	Prenol lipids	Diterpenoids	753.643	1826.62	1845.9	1153.52	551.936	705.285	2461.26	3932.58	4099.81	2689.45	2487.14	2580.29	2077.83	2048.09	2077.8
M147T49	[M+H-C4H8O]+	Zerumbone	1.07845	0.310937	0.119434	147.116	49.372		C20262	Lipids and lipid-like molecules	Prenol lipids	Sesquiterpenoids	9024.33	71725.1	25596	80604.4	8966.62	7690.97	6548.59	10730.3	7263.69	13416.7	11130.2	14219.7	27933.2	27932.5	28381.4
M290T221	[M+Na]+	Zidovudine	0.441233	1.49027	0.242536	290.085	221.15	HMDB0014638	C07210	Nucleosides, nucleotides, and analogues	Pyrimidine nucleosides	Pyrimidine 2',3'-dideoxyribonucleosides	12900.7	3652.6	1631.56	4251.02	14230.2	13044.4	13597.2	15570.4	15153.8	13954.9	14889	916.91	1840.58	1836.68	1923.45
M383T475			0.821528	9.22077	8.68047e-08	383.229	475.433						1399.56	1486.25	3336.09	1030.31	943.502	1134.81	13378.4	14823.3	16804.5	11437.3	16563.5	13027.7	7985.79	7571.14	7986.28
M834T190			0.700603	0.467294	8.20558e-07	833.518	189.679						18250.9	18852	14144.8	19296.5	17341.6	18863	7121.86	8268.44	9215.71	8124.3	7417.46	9735.27	13460.9	13713.7	13400.4
M418T448			0.560833	2.98111	8.37224e-07	418.229	447.567						2738.2	2914.21	4396.61	2820.09	2319.39	2503.69	8849.83	10686.3	8368.68	8288.22	9167.79	7381.52	5941.41	6123.2	5945.88
M487T361_1			0.435863	0.38042	1.22804e-06	487.119	361.062						5728.11	5607.95	5504.66	6881.1	6492.53	6060.4	2203.97	1801.28	1306.85	2913.3	2339.07	3235.17	5072.85	4975.19	5072.53
M1132T403_3			0.301184	7.08957	1.76857e-06	1131.88	403						127.186	533.99	814.489	99.1058	124.512	19.6174	2392.62	1806.57	2412.2	1965.12	1846.97	1762.78	1462	1317.24	1476.22
M606T432_2			0.352325	2.82484	1.79269e-06	606.284	431.586						1382.42	1977.83	992.977	1254.99	1155.29	1155.94	3672.13	4284.13	2914.5	3552.65	4145.73	3802.01	2866.4	2848.02	2894.77
M494T443_1			1.10206	9.80044	1.89383e-06	493.803	443.208						1391.49	1214.9	7788.86	1013.17	2184.66	1889.05	30083.8	29320	20799.4	23822.3	29401.4	18304.7	11886.1	11801.9	11886.4
M362T389			0.142937	0.21028	1.9002e-06	362.066	388.859						422.399	633.841	528.933	432.989	539.708	467.363	36.5407	92.4887	104.564	159.624	53.2908	189.638	259.432	238.45	236.682
M246T514			1.82963	0.327258	2.01189e-06	246.181	513.829						100654	119460	89355.1	83274.9	92225.3	86586.3	13558.9	29698.6	37206.6	33300.8	34852.6	38428.3	70516.7	70793.7	70795.3
M616T34_1			1.23476	0.310153	2.2063e-06	616.408	33.531						43973.7	39970.4	37364.6	40745.6	46658.5	44695.1	7157.56	11790.1	6430.96	12453.2	16781.2	23982.3	29494.9	29495	27757.1
M597T34_1			0.958752	0.216995	2.2651e-06	597.392	33.838						26337.1	26489.2	19181.7	19825.8	21539.9	18486.7	4007.27	3263.75	2491.36	3001.61	8531.97	7317.15	13856.9	13860.6	12811.6
M951T361			0.185924	0.266248	2.33247e-06	951.252	360.931						837.547	900.223	793.952	1051.61	1038.44	920.087	201.777	153.355	56.0692	385.877	261.884	416.547	730.415	730.415	750.951
M650T58			0.792588	0.278207	2.74111e-06	650.28	58.4715						21636.6	16590.6	16924.4	18862.3	18508.1	14071	5068.44	6234.27	6992.97	6716.68	2730.83	1911.76	7480.26	7965.49	7747.19
M1037T400_4			0.553731	6.20908	4.01949e-06	1037.44	400.053						285.302	2578.46	2690.6	781.707	218.944	103.972	7236.45	8144.32	7287.18	6182.43	7215.84	5279.94	3644.14	3797.52	3620.94
M867T422			0.265508	4.08085	4.13755e-06	867.148	421.609						500.464	250.599	792.497	73.8041	416.852	575.461	1861.21	2088.4	1710.08	1297.93	1866.69	1825.39	1165.43	1124.83	1127.81
M341T361			0.604595	0.29359	4.2967e-06	341.051	360.931						11137.3	10776.4	7400.73	11386.8	9061.62	9370.05	2483.35	2096.39	1629.44	4637.42	2679.23	3834.98	7048.74	7046.9	7175.37
M829T400_1			0.428237	7.34184	4.35722e-06	828.547	399.991						195.448	860.954	1220.47	769.971	58.5593	185.288	4003.9	4822	5161.87	3702.52	3514.32	2955.12	2017.14	2022.74	1768.47
M583T33			2.78669	0.329413	4.68705e-06	583.413	33.189						213111	247515	175366	251622	224309	210453	40558.7	62426.7	38856.1	87403.8	97990.3	108372	150154	150152	149026
M503T361			0.190858	0.484688	6.59998e-06	503.092	360.997						1358.88	1370.54	1328.91	1337.83	1443.85	1377.69	473.865	562.955	442.835	823.803	756.644	922.919	1177.17	1138.77	1177.64
M195T149_2			0.408202	0.243837	6.96017e-06	195.064	149.401						4083.89	3512.41	6099.21	4395.25	4263.97	4611.29	594.275	607.009	1102.83	1793.45	1274.05	1203.7	1509.1	1655.49	1568.81
M1038T400_3			0.515341	7.63749	7.18349e-06	1037.81	400.048						263.268	1817.62	1987.84	390.37	44.4312	107.39	6488.39	6620.4	7402.52	4495.88	5652.55	4556.13	3061.14	3053.48	3061.15
M428T358			0.544205	4.78523	7.53839e-06	428.286	357.918						356.113	2386.23	4075.77	567.884	818.829	676.853	5727.79	7391.71	7621.8	7109.07	7659.42	6991.07	4178.75	4178.84	4134.97
M1038T400_1			0.522732	5.34928	9.805e-06	1037.56	400.094						524.521	2052.63	2565.29	1081.91	393.926	509.696	6280.88	7840.19	7531.04	5468.97	6501.65	4506.84	3489.95	3489.65	3560.32
M877T487_1			0.462956	0.370542	9.8858e-06	876.965	486.534						7796.55	5608.01	7688.48	6665.06	6264.87	6261.29	3362.07	1621.94	1881.69	1452.65	3253.88	3354.79	4376.01	4332.09	4288.11
M1152T235			0.2428	3.52775	1.05237e-05	1152.5	235.459						518.023	110.208	798.76	26.6242	574.163	602.927	1533.16	1504.38	1292.24	1667.87	1679.48	1603.35	1452.73	1379.13	1449.94
M876T487			0.480892	0.401288	1.06781e-05	876.462	486.534						8711.4	6899.44	8209.8	8011.26	6615.68	6913.04	4107.11	2268.9	1939.74	2039.8	3616.89	4230.24	4584.49	4539.8	4539.81
M471T153			0.552933	3.11421	1.09598e-05	471.249	153.359						2017.77	3102.52	4688.17	1804.2	1695.07	2980.89	8585.9	10802.1	8730.67	7754.35	7933.04	6920.15	3838.55	3837.49	3770.18
M407T288			0.190147	0.523651	1.14225e-05	407.075	287.801						1597.62	1499.88	1448.87	1927.48	1563.51	1334.19	825.434	859.979	664.861	839.965	970.936	746.244	1250.85	1273.25	1250.76
M1005T302			0.273221	2.39462	1.14804e-05	1004.62	302.3						1215.42	889.153	1313.71	613.58	817.18	1469.2	2664.59	2717.26	2910.64	2439.29	2062.9	2335.11	1970.79	1833.9	1841.85
M338T168			0.594669	0.587402	1.29647e-05	338.049	168.168						17912.4	18840.5	14414	16790	14649.5	17987.5	9540.01	10084.7	10635.7	8871.37	8555.94	11401.4	12542.8	12301.1	12542.8
M1189T400_5			0.455185	7.52896	1.31476e-05	1189.2	400.02						188.041	1390.22	1570.62	346.253	86.0517	92.381	5068.9	5418.39	6036.01	3556.62	3839.69	3738.51	2462.01	2383.96	2387.02
M1129T403_2			0.421013	7.07898	1.36334e-05	1128.74	402.55						170.753	962.749	1719.74	338.072	56.7865	42.1709	4007.94	4967.6	4196.94	4099.55	3394.62	2625.11	2128.16	2106.85	2128.75
M577T409			0.303225	2.71679	1.42488e-05	577.317	409.337						925.029	1162.82	870.559	1361.3	983.348	891.418	2966.05	2631.85	1873.25	2976.61	3416.63	2964.67	1881.76	1942.69	1904.8
M680T57			0.704882	0.370534	1.457e-05	680.289	57.468						16155.4	13079.2	14072	20360.6	17128.1	16784.4	3284.12	6255.32	4260.63	8301.75	7716.5	6338.34	13995.4	13992.7	13126.9
M118T408			0.553515	0.397104	1.49225e-05	118.085	407.621						11530.7	8721.71	9177.33	7625.89	10795.7	12050.2	4008.52	2886.47	3895.25	4180.61	5181.18	3635.12	7008.4	7071.39	7071.35
M458T245			0.45459	4.34498	1.58882e-05	458.118	244.568						2402.61	779.572	656.258	988.691	767.621	1819.07	4939.83	6306.5	6963.09	5470.29	4322.56	4210.63	3195.52	3197.99	3118.19
M357T361			0.228407	0.397231	1.59352e-05	357.025	360.87						1754.79	1908.02	1456.66	1801.84	1425.28	1636.07	628.6	462.938	351.054	1021.32	617.544	883.968	1371.41	1377.59	1370.73
M617T48			1.27872	0.289362	1.75195e-05	617.419	47.885						37867.4	49854.3	39103.9	45336	53271.1	46819	4869.78	7784.94	4970.85	19997.1	16560.7	24595.9	30744.8	30738.5	29717.9
M363T433			0.298125	1.75363	1.85314e-05	363.08	432.69						2162.67	2033.28	3007.66	2189.04	1985.64	2384.84	4165.47	4212.33	4637.89	3900.82	3444.14	3774.79	2784.85	2825.7	2771.65
M1035T400_4			0.60858	6.50557	1.88418e-05	1035.05	400.085						247.551	3417.41	3107.23	591.017	200.107	179.198	8901.68	10397.5	10072.1	6762.96	7991.84	6243.41	4444.14	4444.42	4335.17
M789T231			0.29465	0.459022	1.91049e-05	789.187	230.613						3426	3443.64	3121.52	4010.31	3471.72	3049.36	2252.86	1842.12	1432.32	1768.01	1288.39	836.61	2787.81	2755.24	2686.95
M521T352			0.57221	2.03909	1.97736e-05	521.282	352.283						5611.5	5138.89	7032.93	6293.32	6660.36	5239.24	12199.3	13633.3	13649.4	11889.6	13260.9	8726.14	7076.69	7076.72	7014.41
M920T400_1			0.393926	6.35367	2.07262e-05	920.05	400.094						133.92	943.207	1506.49	432.387	164.711	108.054	3626.09	4144.57	4335.58	3055.61	3526.81	2207.09	1803.24	1734.17	1739.47
M1186T400_5			0.555869	6.04258	2.09689e-05	1186.21	400.085						177.008	3038.69	3005.71	523.563	121.236	191.886	7587.42	8378.08	8676.23	6105.34	6466.22	5435.82	4131.25	3976.76	4133.28
M494T443_2			0.855553	8.76632	2.15148e-05	494.303	442.603						1467.32	746.415	5117.61	1273.87	1339.44	925.904	18567.5	15732.5	10804.4	13993.3	22932.8	13264.2	8149.02	8403.78	8149.49
M633T361			0.199392	0.522277	2.15685e-05	633.188	361.26						1572.92	1679.14	1662.53	1659.61	2154.29	1680.41	820.126	832.176	644.018	994.015	1018.04	1127.95	1426.51	1462.05	1461.94
M921T400_1			0.439354	7.30386	2.19849e-05	920.609	400.094						45.1336	1514.38	1432.55	305.803	192.366	51.1497	5378.65	4579.3	5321.65	3754.04	4108.06	2724.06	2309.56	2309.65	2154.3
M864T302			0.31654	2.32709	2.22901e-05	864.211	301.545						1831.72	985.905	1495.26	601.533	1713.73	2296.68	3222.93	3296.29	3710.15	3657.95	3627.2	3254.35	2958.25	2957.8	2881.72
M1042T419			0.290507	2.96136	2.23631e-05	1042.2	419.122						626.254	1096.79	1346.9	416.867	710.172	821.995	2516.13	2978.63	2211.79	1808.11	2516.92	2831.41	1417.87	1417.96	1430.06
M1035T400_7			0.586491	5.84462	2.33335e-05	1035.43	400.053						362.618	2868.84	3603.4	690.124	318.102	240.533	8350.34	9970.06	9152.27	6687.98	7278.87	5806.16	4206.6	4311.36	4310.54
M548T169			0.305725	0.258307	2.45523e-05	548.064	169.091						2911.31	2805.68	1927.32	2549.49	1971.12	2510.15	290.038	1140.07	982.745	235.585	177.512	964.721	1286.61	1285.85	1339.05
M421T169			0.376263	0.279131	2.48192e-05	420.55	169.132						4232.39	4241.98	2726.88	4129.05	3120.02	4418.29	979.858	1175.44	1995.5	626.034	302.09	1304.41	2273.14	2269.1	2439.4
M1131T403_2			0.343527	4.61709	2.4846e-05	1131.45	403.197						471.212	552.572	1715.27	492.944	367.497	201.23	3110.73	2533.28	3553.64	3498.66	2554.82	2297.15	1755.88	1722.54	1722.42
M1132T402_3			0.340533	4.92136	2.5006e-05	1132.45	402.014						265.589	1108.39	1337.61	505.203	107.064	82.527	2009.49	3418.37	2504.17	2786.72	3289.84	2755.43	1796.69	1796.47	1747.97
M236T276			0.26204	0.346837	2.52425e-05	236.022	276.361						2095.21	2200.87	1405.68	1891.79	1940.67	2634.05	633.897	485.47	546.29	830.737	756.66	967.346	1589.19	1585.92	1671.96
M666T169			0.345052	0.311609	2.63769e-05	666.054	168.966						3779.08	4247.22	2549.04	3435.01	2620.27	3619.01	883.053	757.594	1742.91	1264.8	638.712	1022.89	1974.94	1910.81	1973.19
M785T465_2			0.819062	7.68622	2.64455e-05	785.08	465.462						590.164	1177.05	7392.76	424.775	988.367	869.599	10896.6	19351.2	14151	17891.6	13790.9	11870	10029.9	9842.91	9844.71
M1132T403_2			0.307413	8.20159	2.65835e-05	1131.74	403.233						108.855	418.768	824.758	24.8175	160.523	50.0185	1798.98	1703.36	3127.44	2531.61	2104.88	1755.72	1102.7	1087.02	1087.14
M118T263_1			0.780229	0.426806	2.72096e-05	117.727	263.012						25852.7	20989.2	18160.6	16289.2	19994.4	24344.3	11622.6	7062.6	8693.71	10069.2	9194.12	6977.48	15135.1	15143.7	14385.8
M335T164			0.41792	0.209648	2.73167e-05	335.123	164.169						3921.94	4787.15	3285.95	6038.08	4802.13	3548.56	164.074	244.023	1140.36	1598.01	1150.5	1234.33	3400.17	3346.32	3347.28
M321T445			0.335063	2.44757	2.99593e-05	321.176	444.894						1023.92	1935.08	2212.38	1419.05	1047.29	1187.57	3213.89	4071.02	3684.61	4052.76	3852.31	2725.96	2410.52	2375.06	2410.69
M577T242			4.18202	5.78382	3.00419e-05	577.278	242.018						77897.9	32605.8	182731	5367.68	53163.3	68058.4	403542	568392	287347	359655	449406	359843	206800	207813	207810
M488T391			0.563998	3.53297	3.02432e-05	488.282	390.928						1311.36	3363.41	4263.87	3103.88	762.388	1637.48	9511.31	10920.8	6491.06	8689.16	7950.31	7461.9	6499.86	6591.65	6591.84
M420T390			0.228834	0.314085	3.02631e-05	420.142	389.937						1468.98	1433.47	1046.34	1367.6	1885.06	1930.26	477.091	437.619	518.477	261.221	622.031	551.693	807.203	808.77	900.384
M1185T400_3			0.517334	5.87918	3.0266e-05	1185.5	400.089						195.649	2093	3121.06	617.853	52.9557	116.167	6204.31	7838.62	6294.2	5308.69	6382.97	4402.68	2908.24	2908.08	2935.21
M1053T396_1			0.358636	3.62979	3.03267e-05	1052.69	396.151						460.457	1698.25	1890.08	655.531	465.028	477.629	2933.51	3983.47	3808.99	2849	3856.35	3066.01	2373.24	2374.14	2244.35
M275T331_1			0.200557	0.380067	3.03276e-05	274.99	330.802						1364.86	1272.89	1108.32	1094.53	1663.57	1399.52	549.769	322.348	643.466	318.884	406.958	762.507	843.684	851.425	843.763
M1040T400_2			0.345959	5.7422	3.23418e-05	1040.06	400.206						136.451	1081.91	1050.32	381.13	170.651	75.4008	2656.14	3943.45	2905.28	2545.77	2521.19	2056.77	1839.7	1678.34	1839.02
M827T366_1			0.825163	4.01935	3.24401e-05	826.964	365.842						3359.64	2883.94	10509.4	1272.63	3824.31	4158.91	12782.5	18824.4	18436.4	21758.1	17977.4	14759.8	10376.1	10376	10340
M826T366			0.858895	4.0065	3.26953e-05	826.462	365.7						3696.07	3343.23	11786.5	1851.87	3642.61	4150.41	13453.2	20315.3	20926.7	23284.8	19022.3	17065.7	11611.2	11611.1	11693.1
M336T361			1.86778	0.199766	3.2713e-05	336.096	360.985						84422.8	107442	53389.8	106999	71202.9	73449.3	11590.3	10804.6	7577.63	27184.8	16857.2	25250.5	50305.8	50443.1	50306.1
M650T47			0.658465	0.227446	3.27134e-05	650.413	47.448						13223.5	13091.4	8744.03	10344.4	9070.09	9069.32	521.848	1222.24	1205.93	4129.45	1977.12	5395.99	6239.31	5524.24	5517.34
M1137T236			0.382027	3.59003	3.32133e-05	1136.53	235.535						1315.68	337.512	2519.63	51.8192	1033.17	1084.4	3930.87	3949.02	3037.72	3789.36	4087.11	3974.6	2829.95	2808.85	2828.72
M920T400_3			0.560954	5.1673	3.35031e-05	920.274	399.927						574.571	2845.6	2716.26	1668.03	315.32	575.17	8201.22	9140.98	9582.53	6047.33	6724.13	5233.2	4151.73	4152.11	4233.66
M193T331			0.559409	0.386861	3.40773e-05	193.07	331.281						11379.6	10739.2	7819.39	10158.5	11984.4	8192.33	4412.81	1844.24	3047.38	4149.42	4250.93	5612.68	7623.65	7623.58	7562.52
M628T489_1			0.291708	0.199926	3.5438e-05	627.665	488.819						2656.02	1718.46	1508.17	2861.95	1884.2	2029.56	750.887	149.739	237.331	254.05	555.57	583.162	1101.07	1126.74	1101.98
M695T420			0.799083	3.62212	3.55076e-05	695.133	419.63						5456.69	4089.5	8281.76	533.897	4412.97	5933.47	19746.8	20223.1	16554.7	10599.2	18195.7	18665.5	10311	10238.6	10238.5
M1131T401			0.325276	6.84961	3.59397e-05	1130.74	401.167						36.892	798.093	1161.08	26.9618	91.1801	40.9337	2501.94	1403.12	2483	2862.17	2791.76	2719.92	1160.09	1159.99	1135.02
M344T447			0.875516	9.53274	3.60731e-05	343.731	447.356						1812.93	730.616	4514.95	654.98	1145.33	1574.32	22756.8	22915.9	14820.4	12845.6	14366.8	11750.8	8851.37	8852.13	8437.39
M1132T402_2			0.335961	5.21764	3.60918e-05	1132.31	401.92						70.1552	951.488	1457.98	253.209	259.106	73.5706	2272.44	3148.51	3143.65	2224.59	3049.06	2156.47	1630.18	1630.04	1655.21
M784T466_2			1.50575	8.29817	3.6308e-05	784.411	465.505						1561.87	3971.48	24021.2	1189.54	2769.59	2174.84	35956	65428.8	48921.3	62513	44921.2	38409.4	31022.5	30629.3	31022.1
M578T38			2.32645	5.72891	3.64651e-05	578.212	37.733						1586.33	64424.4	62304.3	2387.71	1982.16	2371.17	131460	143562	123201	93518.6	133992	147990	61956.7	62686.9	61967.9
M719T168			0.410374	0.600614	3.65473e-05	719.056	168.099						8935.62	9816.73	7409.52	8880.94	7244.56	8611.75	4486.33	5213.29	6086.38	4933	4332.13	5519.59	6704.67	6704.45	6893.83
M931T449_1			0.364362	5.03701	3.65775e-05	930.978	449.193						360.221	629.676	1740.58	211.772	364.766	444.785	2602.66	4443	2867.13	3338.77	2840.09	2806.18	2106.55	2149.58	2107.28
M1038T400_6			0.417522	5.63142	3.66358e-05	1038.18	399.991						54.2574	1788.41	1848.28	397.644	74.2493	223.526	4760.18	4672.29	4893.87	2811.2	4022.62	3541.33	2227.54	2227.56	2247.01
M785T465_1			1.17873	7.95442	3.75404e-05	784.746	465.416						912.624	2433.19	15743.7	537.097	1682.16	1569.67	22532.2	39782.3	29502.1	38294.7	27630.8	24242.7	19212.1	19593	19211.4
M287T168			0.362137	0.559154	3.75685e-05	287.044	168.202						7382.81	6031.47	5631.27	5631.13	5147.07	6293.4	3505.69	3356.25	4027.63	3073.81	2542.09	3689.58	5151.12	5067.94	5141.46
M319T361			1.01316	0.221607	3.82749e-05	319.069	360.902						24701.4	32466.2	16680.1	32918.7	21862.2	22610.1	4181.43	4008.63	2577.78	9477.69	5323.88	7946.14	16224.8	16271.4	16224.8
M215T333			0.75122	0.334139	3.83548e-05	215.052	332.69						17553.1	18585.5	14262.1	17921.6	21951.8	12922.8	7721.11	2349.53	4203.17	5402.98	5757.31	9048	12308.7	12290.8	12398.4
M373T289			0.624615	3.66025	3.93072e-05	373.281	289.088						605.883	5039.61	5656.29	3316.14	1233.23	809.965	8245.37	10921.8	9505.68	11897.3	11071.6	9342.09	7188.46	7106.37	7107.51
M139T331			0.225651	0.375985	3.95783e-05	139.038	331.443						1462.11	2013.07	1493.11	2024.37	1677.55	1188.63	782.214	366.907	694.859	588.44	564.288	710.071	1160.07	1292.86	1290.67
M753T134			1.16508	3.97459	4.02639e-05	752.556	134.25						3201.54	12396.1	19096.8	6465.53	7768.35	3146.28	26887.9	45912.9	29666.6	31969.6	37494.8	35043.9	19509.3	21207.5	21246.8
M357T126			2.05041	5.29419	4.05296e-05	357.273	125.959						9286.79	18786.9	49076.6	9369.17	22514.1	2073.04	96451.4	137018	107125	75092.2	95059.3	77473.4	56840.4	56823.9	56200.2
M438T461_1			0.433364	3.7294	4.05617e-05	437.705	461.168						997.592	956.287	3427.41	642.275	771.933	894.366	5025.78	5721.96	4108.34	4066.46	5115.54	4640.48	3244.99	3245.16	3148.52
M578T282			0.359779	2.02307	4.07135e-05	578.227	282.202						3580.92	2546.95	2913.76	2094.48	1743.86	2599.32	5494.61	6155.82	4759.2	4172.35	5317.07	5416.61	4274.15	4308.16	4308.32
M434T242			0.427774	3.97184	4.11276e-05	434.268	241.942						479.196	1549.19	2972.16	1267.96	383.851	295.92	3747.46	5604.83	4391.76	5096.17	4528.19	4229.02	2828.25	2635.65	2830.4
M476T407			0.60862	3.1655	4.27775e-05	476.271	406.769						1827.97	4755.3	6018.13	3222.65	1846.38	1758.78	9857.5	12158.3	8335.31	12301.8	10413.3	8436.89	6587.16	6587.29	6493.63
M509T361			0.178556	0.517458	4.28285e-05	509.102	361.173						1489.49	1113.53	1215.13	1377.4	1532.65	1558.22	801.032	614.377	619.316	842.958	514.379	895.816	1358.09	1335.03	1335.11
M717T168			0.67918	0.502886	4.39224e-05	717.06	168.168						19554.6	21285.3	15548.7	20503	13900.5	18640.2	8137.71	8744.28	11045.2	8807.96	7548.84	10748	14090.2	13874.2	13874.6
M753T400_4			0.314469	6.98119	4.426e-05	753.134	399.991						147.207	553.266	743.005	351.072	58.7142	42.3244	2255.29	3055.93	2612.07	1619.95	2278.65	1411.57	1153.78	1152.51	1107.91
M1129T403_1			0.477363	5.11629	4.43709e-05	1128.6	402.745						198.531	2446.64	2733.86	764.648	68.6103	93.9278	5823.65	6678.6	5702.13	5166.4	5042.42	3851.21	3219.24	3079.01	3222.56
M640T304			0.152057	1.67538	4.49761e-05	640.228	303.872						594.074	675.497	862.281	680.156	636.892	535.333	1099.18	1183.25	1297.38	1099.59	1021.99	973.734	521.841	522.374	594.904
M335T430			0.325632	2.54017	4.50236e-05	335.192	430.139						887.612	1374.84	1725.14	1789.03	1277.58	830.694	3426.07	4145.92	2367.67	3479.37	3609.96	3000.02	2607.17	2477.73	2484.94
M627T489			0.293288	0.314481	4.51545e-05	627.33	488.74						3009.69	2329.32	2248.82	3545.94	1987.69	2078.32	794.723	766.781	753.276	693.324	997.809	774.135	1394.71	1378.53	1378.39
M554T168			0.568423	0.480503	4.53653e-05	554.056	168.202						14121.2	13689	9383.6	12972	9715.8	13131.7	5493.53	5130.2	7295.43	5478.44	5031.99	6653.51	8694.18	9139.36	9136.16
M433T242			0.754207	5.82766	4.60283e-05	433.265	241.558						640.164	3915.79	6306.12	1814.29	756.677	609.78	10161	12425.9	12816.3	17739	10933.4	17761.2	4060.52	3783.05	3792.17
M403T371			0.238271	2.71584	4.79308e-05	403.273	370.745						760.525	746.644	717.806	787.186	560.528	343.522	1630.56	2475.66	1635.03	1752.22	1735.58	1406.76	1060.14	1123.47	1212.37
M393T168			0.370002	0.488226	5.00511e-05	393.05	168.275						6645.51	5586.66	5399.77	5203.96	4270.79	5731.09	2178.67	2438.79	3614.92	2884.94	1803.71	3111.21	3934.54	4089.46	3934.77
M358T516			0.888367	0.320243	5.07572e-05	358.252	516.405						27898.7	24500.6	19040.8	14310.9	25053.5	23593.2	5719.27	4695.96	4423.03	10560.3	8402.94	9238.44	15791.8	15434.8	15421
M1183T400_3			0.714578	6.38896	5.25379e-05	1182.92	400.089						286.779	4051.64	5156.5	904.728	142.317	291.787	11820.8	15852.2	13314.8	9303.79	10697.7	8227.1	6041.76	6104.93	6100.51
M359T516			0.310417	0.453136	5.25708e-05	359.255	515.819						4073.67	3126.97	3819.66	3167.82	4040.07	3186.07	1611.34	1128.12	858.847	2347.49	1821.91	1935.87	3067.86	3236.04	3487.97
M837T366			0.434146	3.46138	5.33635e-05	837.454	365.856						1076.07	1352.74	3222.8	1094.96	879.154	1157.54	4421.82	5808.62	6417.03	5142.2	4971.6	3641.01	3149.79	3149.05	3089.95
M784T466_1			1.48438	9.78399	5.38429e-05	784.078	465.505						1231.84	2651.26	20518.7	954.809	1822.94	2026.23	32530.9	64358.6	48338.1	62990.8	42346.7	35183.7	28438.4	27900.8	27896.7
M379T361			0.150573	0.508278	5.4296e-05	379.007	361.05						1058.46	874.746	837.771	846.356	849.502	1025.41	338.229	371.715	355.781	664.685	505.56	555.619	866.539	854.468	866.611
M667T301			0.255482	1.53711	5.44354e-05	667.257	301.164						2612.1	2789.66	2554.83	2009.99	2299.22	2799.88	3162.47	4270.47	3922.56	4149.72	3878.91	3773.49	3136.32	3003.06	3136.41
M601T239			1.05374	3.78759	5.51306e-05	601.278	238.773						7799	5965.53	15560.1	2550.14	3635.36	10985.4	28508.5	23961.9	21813.7	34462.1	38429.6	28930.2	14330.8	13857	13853.1
M210T331			0.350801	0.377737	5.71698e-05	210.096	331.378						4077.76	4269.87	3631.08	4586.31	4987.57	2989.49	1826.19	814.633	1541.2	798.402	2137.52	2152.51	3002.15	3001.81	3032.02
M553T169			0.50998	0.389135	5.77395e-05	553.058	168.645						9792.98	9692.25	6595.1	8220.78	6420.75	9582.06	3225.77	2778.2	4661.91	3236.22	1597.33	4075.61	5242.13	5238.47	5347.78
M740T169			0.330339	0.308612	6.34193e-05	739.569	168.925						3136.26	3739.35	2276.55	3499.93	2662.12	3669.24	393.816	548.323	1680.87	1136.96	1566.39	532.16	2062.9	1826.15	2069.87
M429T406_1			0.585851	4.47495	6.57822e-05	428.784	406.48						707.012	1246.28	4949.06	1749.78	1482.19	1073.74	8258.63	6924.79	6155.82	8212.42	11540.1	9063.71	5581.71	5657.84	5657.74
M828T366			0.362283	3.56525	6.58541e-05	827.967	365.817						821.986	646.091	2415.56	177.723	940.825	908.709	2824.04	3652.69	3738.6	4424.54	3424.16	3009.77	2288.9	2333.77	2331.91
M838T366_1			0.387368	4.08978	6.62314e-05	837.955	365.827						912.857	527.123	2080.52	209.485	913.713	974.864	3533.82	4541.17	4925.83	4214.22	3145.49	2618.18	2395.62	2367.8	2396.04
M429T406_2			0.410936	4.55747	6.63092e-05	429.286	406.407						270.333	831.25	2210.6	826.794	633.025	651.777	4122.33	3520.02	2978.35	3939.72	5939.66	4218.69	2692.54	2693.46	2811.02
M1183T400_4			0.72827	6.36467	6.63093e-05	1183.06	400.088						498.052	4585.18	5220.23	792.947	122.831	127.827	12969.8	16142.7	13880.4	11608.6	9934.62	7684.3	5677.31	5677.1	5491.09
M567T33_2			1.68468	0.439084	6.86427e-05	567.418	33.191						91918	115248	90832.2	98130.9	135730	94026.7	34464.2	38409.3	30728.9	51302.9	59250.5	60660.6	80237	80237	79259.1
M465T361			0.455294	0.352404	7.04045e-05	465.138	361.337						5185.38	7762.25	5443.4	7812.85	6879.55	4932.3	1988.89	1705.07	1084.17	2874.14	2359.17	3385.44	4462.46	4506.25	4505.97
M502T333_1			0.546807	8.34939	7.0589e-05	501.789	332.695						53.4139	1608.89	2780.33	153.004	82.283	180.589	4025.24	7846.81	6172.18	9815.5	6063.04	6642.88	5455.59	5318	5456.24
M179T168			0.685411	0.6032	7.11222e-05	179.04	168.202						24538.5	27375.5	20605.7	24939.7	19661.4	26354.7	13946.6	13868.1	16051.8	14635.6	11526.8	16515.5	19248.7	19249.1	18827.1
M1035T400_6			0.61966	5.95064	7.19094e-05	1035.31	400.087						293.05	4497.6	3160.97	675.224	185.559	235.48	9278.22	12480	9857.1	7282.47	8527.46	6415.44	4744.83	4650.5	4651.43
M379T245			0.606647	3.25186	7.22551e-05	379.199	245.213						2123.23	5622.25	5459.59	3311.28	1949.91	561.435	8746.13	12491.2	8576.36	8847.32	11958.5	11255.8	5318.82	5313.64	5026.01
M847T401_1			0.445124	4.17311	7.31417e-05	846.809	400.65						692.28	1129.07	3132.99	400.702	925.603	1015.38	3266.63	4492.27	4840.63	5874.44	6064.83	5908.35	3107.47	3163	3109.18
M409T418			0.187732	2.06851	7.37943e-05	409.137	418.493						885.786	695.076	584.319	599.054	904.664	530.352	1709.75	1407.33	1281.56	1571.35	1088.22	1627.97	1389.38	1310.52	1385.42
M229T515			0.293406	0.496399	7.40059e-05	229.154	514.807						3855.43	3969.58	2949.3	2818.41	3870.63	3270.85	1871.08	1070.28	1437.47	2254.79	2003.18	1655.64	2412.14	2575.58	2574.69
M968T448			0.797829	3.70119	7.44393e-05	967.536	447.924						3372.13	5234.87	9323.42	2790.76	2424.35	3809.69	16170.2	23407.3	16105.9	17700.8	14315.5	12066.7	9925.3	9623.06	9620.2
M1005T483_3			0.214369	2.33486	7.49972e-05	1005.16	483.284						595.349	668.003	957.172	511.924	768.958	636.161	1356.06	1605.7	2149	1507.05	1757.08	1285.73	1252.59	1298.29	1299.52
M1183T400_5			0.621288	5.70772	7.80155e-05	1183.21	400.02						254.846	4644.92	3798.04	552.174	74.0154	183.335	9551	12081.6	9776.88	8111.26	8574.7	6169.75	4881.68	4983.92	4881.83
M615T33_1			1.47132	0.327855	7.8345e-05	615.403	33.233						76877.7	61159.3	55152.8	45901.4	59232.3	66229.2	10621.9	11342.1	9872.82	24281.5	23967.3	39434.7	40173.8	42033.3	40200.8
M1064T419			0.153285	3.12773	7.86638e-05	1064.18	418.551						218.855	380.362	229.786	49.4256	214.448	263.406	706.884	878.546	841.702	456.749	654.097	704.106	449.138	377.277	376.001
M617T236			0.914094	2.30814	7.8716e-05	617.269	236.487						18223.7	8711.65	16362.6	3337	15455.3	12653.1	28937.2	29568.1	24979.6	25830.5	31221.5	31981.5	17277.7	17178.6	20507.7
M1015T403_4			0.379232	5.28493	7.88702e-05	1015.41	403.091						110.848	1829.54	1322.37	545.794	167.045	50.4629	4333.77	2791.51	4039.9	3485.39	4258.05	2368.83	1569.16	1636.91	1637.13
M658T168			0.559616	0.566109	8.04528e-05	658.065	168.168						15202.5	16975.2	11755.4	15524.9	11236.7	14698.6	7108.19	7627.59	8888.1	8246	7613.01	8859.1	10795.5	10964.2	10965.1
M502T348			0.217645	3.94488	8.05174e-05	502.108	347.623						395.719	219.657	293.666	66.1852	505.57	478.71	1242.3	1444.73	1832.71	918.412	1001.99	1289.88	612.847	587.838	585.973
M347T421			0.347216	1.81918	8.13644e-05	346.996	421.033						3348.75	2914.37	3678.19	1403.6	2683.75	3470.69	5110.84	5641.02	5372.34	4593.79	5476.12	5640.35	3265.51	3363.74	3084.19
M394T360			0.250945	0.465043	8.18625e-05	394.101	360.262						2853.83	2511.74	1876.86	2010.71	2390.05	2563.6	1301.33	860.259	818.264	1622.75	838.15	1166.01	2003.86	2038.63	2003.73
M711T168			0.93893	0.469328	8.20038e-05	711.069	168.451						35604.4	38106.6	25159.9	39093.8	25106.6	33454	13219.7	15025.5	19221.1	15575.5	12433.7	16759.3	23198.9	23198.7	23062.4
M1038T400_4			0.46664	7.06476	8.27534e-05	1037.93	400.085						140.445	1723.29	1778.68	323.511	112.431	105.118	5164.07	5897.88	6792.55	3813.85	5005.6	2881.31	2766.31	3047.16	2761.07
M1055T396_5			0.324691	3.0059	8.37986e-05	1055.26	396.356						576.895	1683.93	1918.03	709.711	652.75	595.626	2921.77	2739.56	2890.48	2597	3982.16	3316.04	1967.27	1887.25	1974.79
M943T453_1			0.272371	3.73263	8.43906e-05	942.993	453.428						204.998	563.863	1463.55	169.908	347.665	278.596	2107.96	2139.18	1693.85	1945.39	1741.77	1676.42	1347.33	1347.3	1330.25
M502T235			0.960684	3.44258	8.44247e-05	502.256	234.631						6707.98	4255.34	13804.5	3848.98	7878.28	7535.4	27192.6	33452	15539	22679.5	27081.1	25634.3	15110.2	15503	15113.4
M917T477			0.259206	3.03291	8.47329e-05	916.93	476.696						441.691	875.801	1233.61	440.101	420.066	432.972	1481.79	2396.06	2280.1	2007.47	1941.23	1552.6	1302.33	1305.04	1358.51
M753T400_5			0.309669	5.52023	8.59645e-05	753.226	400.085						248.012	763.714	647.108	279.008	183.902	415.3	2559.44	2497.98	3538.95	1650.25	2039.82	1718.61	1198.63	1248.43	1247.55
M548T33_1			0.584914	1.90264	8.8463e-05	547.526	33.197						7313.13	6065.45	8839.31	7246.54	6384.13	8580.6	16461.8	15417.2	16688.6	12058.6	11992	11914.5	7931.66	8395.45	8407.76
M605T168			0.734172	0.483032	8.86509e-05	605.062	168.492						23093.7	24069.4	16371.1	23207.4	15270.7	21795.8	8324.32	9844.94	11953.3	10554.7	7857.24	11268.7	14735.5	15003.9	15005
M1183T400_2			0.672375	6.88068	8.86881e-05	1182.78	400.005						233.907	4241.73	3606.36	639.165	21.9657	154.59	10865.2	14601.1	11503.3	8899.58	8940.33	6412.89	5170.75	5224.29	5224.24
M472T400_1			0.30511	3.08929	8.98338e-05	471.737	399.974						267.828	291.843	1239.58	1455.39	1206.51	720.028	2696.88	2764.52	2250.35	2040.89	3405.14	2848.38	1833.76	1580.43	1854.72
M156T292			0.590783	0.218515	9.04995e-05	156.041	291.952						11636.5	7889.28	6955.2	5944.86	10581.5	10178	3095.55	431.739	415.988	3477.57	3237.43	963.547	6004.28	5906.08	5906.05
M85T297			0.363041	0.354551	9.09545e-05	84.9101	296.645						4159.03	3939.2	3215.94	4058.84	4504.26	5738.33	2535.56	763.988	1633.37	1848.17	1527.46	773.485	2596.62	2891.4	2903.29
M617T34			2.50586	0.289698	9.37098e-05	617.418	33.839						189166	172733	128799	126406	200665	202795	20783.7	28800.7	18402.2	64400.2	63254.1	100015	97071.8	98026.1	98031.5
M484T447			0.93786	2.44156	9.58523e-05	484.271	447.055						9050.11	12894.1	19442.2	9105.6	9364.13	8937.07	29445.2	34611.3	25160	29830.1	28933.4	19982.9	18076.8	17571.1	17552.3
M827T366_2			0.562878	3.36543	9.67719e-05	827.465	365.827						2062.13	2313.92	6013.65	1001.92	2104.19	2335.4	5872.76	9358.78	9931.52	10891.9	9156.79	8067.08	6064.43	6066.69	6112.32
M694T30_2			0.341912	0.533132	9.72375e-05	694.494	29.836						6654.64	4480.67	4497.86	5907.72	5182.77	4795.98	2921.83	2503.13	3162.19	2592.55	2267.09	3357.34	4032.95	3926.33	3925.53
M656T168			0.457235	0.539592	9.92415e-05	656.068	168.099						9714.93	11106.2	7412.6	9366.29	7059.69	9689.88	4680.87	5353.4	5696.72	4824.3	4027.45	4743.85	7112.53	7236.24	7118.14
M1049T459_2			0.235307	3.67805	0.000101633	1048.77	458.822						374.962	414.252	694.961	97.4553	402.956	471.011	1151.99	2204.7	1334.91	1705.18	1333.78	1301.24	946.106	946.091	930.36
M666T121			0.516791	0.342922	0.000102081	666.243	121.252						9531.52	8281.8	7541.77	5066.37	8921.85	10472.5	2310.32	2482.72	2701.82	4870.63	2903.9	1813.55	5640.29	5620.46	5006.45
M450T168			0.344674	0.443751	0.000103394	450.047	168.451						4623.4	5271.26	3362.91	4477.53	3886.45	4788.62	1873.26	1493.78	2769.53	2753.33	1033.07	1796.56	3410.75	3437.02	3412.95
M246T405_1			0.173417	1.90927	0.000103831	246.037	405.155						659.352	501.509	933.362	431.922	649.332	743.495	1106.83	1105.7	1187.1	1322.02	1250.4	1510.33	807.593	840.453	802.153
M253T331			0.35871	0.406394	0.000104002	253.008	331.013						4979.02	4278.45	3813.93	3854.81	5827.39	3940.34	2218.82	641.681	1607.02	1819.59	1937.49	2623.63	3470.15	3414.67	3461.05
M552T168			0.601541	0.486574	0.000105362	552.059	168.492						15727.1	16396	10271.8	15292.8	11039.3	14979	5807.93	6396.64	8244.29	7543.4	5306.47	7430.44	10051	10189.8	10050.3
M386T167			0.502296	0.268839	0.000105778	386.144	167.34						4082.69	7992.82	7328.98	8241.79	8915.24	7787.86	387.769	1192.64	1030.43	3366.72	2440.92	3504.33	6179.82	6054.7	7323.96
M875T377			0.248361	2.34192	0.000106317	875.496	376.581						584.057	1347.03	1219.34	1026.57	711.767	550.131	2204.56	1823.55	2225.94	1808.4	2721.63	1953.4	1345.54	1250.43	1347.1
M265T361			0.239588	0.324845	0.000107654	265.037	360.902						1481.78	2045.23	1285.51	2105.34	1464.65	1626.97	309.355	366.964	280.011	1006.35	475.437	813.413	1163.57	1163.87	1213.41
M649T48			0.812986	0.257341	0.000107898	649.408	48.048						18260.9	19776.8	13675.8	21314.7	13607.4	14873	1128.36	1806.81	599.992	6948.86	5770.04	9868.27	12256.8	12336.4	12015.7
M1128T403_5			0.47501	4.23749	0.00011638	1128.46	402.953						180.914	2822.88	3922.81	641.052	297.538	100.778	5800.52	6368.72	5895.87	5784.54	4888.9	5017.2	2743	2742.47	2677.07
M484T497			0.259304	2.89662	0.000116443	483.76	497.308						568.937	358.225	1254.45	330.95	744.359	781.867	2103.35	2022.35	1259.6	2045.27	2409.79	1858.49	1266.67	1319.26	1318.05
M845T301_2			0.276767	2.5397	0.000117805	845.236	300.88						1067.45	643.931	1579.29	335.606	1288.49	970.951	2355.98	1882.06	2348.06	3131.08	2675.15	2555.6	1672.43	1736.29	1789.83
M471T400			0.398657	2.55362	0.00012067	471.234	399.723						741.368	2229.26	2868.28	1339.08	2490.23	2097.11	4788.72	5686.84	3595.33	4564.19	6345.47	5063.67	3501.72	3445.39	3447.01
M446T168			0.642033	0.512467	0.000121929	446.053	168.471						19153.8	19405.5	14094.4	18381.5	13291.7	18726.2	7694.01	9011.29	11685.5	9140.6	5697.01	9582.98	13086.2	13375.9	13376.6
M1129T403_3			0.37926	4.06549	0.000122046	1128.89	402.615						45.4213	1150.31	1453.5	396.284	2450.9	64.1452	3633.36	5032.55	3646.99	3193.69	3755.76	3344.02	2199.26	2235.32	2199.24
M922T400_3			0.384463	7.02325	0.000122323	922.164	399.991						129.936	1086.8	1297.96	254.387	62.6079	20.8731	3213.77	4789.2	4312.67	2439.48	2995.77	2283.39	2238.35	2196.48	2198.09
M846T401_2			0.501878	3.51877	0.000122478	846.474	400.683						1047.35	2385.17	4746.58	700.323	1545.16	1312.92	4907.87	6457.69	6617.5	8991.55	6897.33	7429.67	4830.5	4615.54	4616.43
M678T30_2			0.426136	0.509646	0.000122826	678.494	30.485						6974.92	8627.76	5682.45	7912.58	9110.87	7042.16	2995.82	2928.42	3948.37	3674.9	4978.69	4586.64	4657.26	4789.22	4649.66
M237T333			0.604463	0.33183	0.000122855	237.034	332.704						12334.9	10851.3	9298.33	11762.4	16589.8	9122.17	5691.53	1669.71	3186.16	3185.01	3841.73	5640.29	7986.27	7897.46	7986.29
M873T169			0.402599	0.310223	0.000123891	873.074	169.112						5800.91	5220.19	3873.66	5162.74	3520.87	5193.23	1158.5	892.71	3262.67	1592.39	326.795	1692.53	2700.24	3032.8	3030.93
M1188T401_4			0.355898	5.88021	0.000124317	1188.48	401.355						104.194	1389.25	1361.47	205.108	61.0833	18.7844	2574.36	2818.24	3644.16	4341.33	2957.86	2127.27	1747.86	1652.92	1650.93
M619T403			0.254924	2.19806	0.0001248	619.325	403.434						1017.81	1603.73	1108.61	1361.88	677.164	1173.48	2651.67	1696.13	2908.57	2965.38	2665.86	2372.75	2443.76	2359.1	2380.01
M234T121			0.37275	0.372454	0.000126735	234.206	121.135						4118.46	6423.88	4031.14	4382.55	3834.28	4100.92	995.126	2543.7	2196.83	1736.73	1159.77	1383.59	8367.53	8364.99	8670.83
M702T171			1.82458	1.50052	0.000126874	701.559	171.421						130536	138379	167622	101703	150044	116102	182916	201938	223034	201550	206151	191408	161486	163045	161483
M720T97			0.768491	0.231186	0.000127107	720.272	96.635						12703	18017.6	11616.1	22773.5	19364.5	10690.4	3341.72	3554.4	2576.16	4085.95	3449.85	4992.77	10039.3	9602.79	9603.76
M709T168			0.644828	0.515406	0.000127668	709.071	168.099						18702.2	20488.9	13217.7	18729.6	13059.6	17816.3	7585.44	9340.25	10472.2	8510.54	7226.47	9443.88	12403.4	12548	12403.4
M763T301			0.225554	1.86834	0.000128176	763.241	300.804						1284.8	970.217	1676.34	708.447	1149.6	945.132	1735.29	2240.65	1955.05	2132.14	2257.58	2261.68	1535.98	1485.89	1484.79
M355T157			1.13327	4.91049	0.000130358	355.258	156.661						1580.26	6706.33	21135.9	4417.99	1777.11	2499.92	19812.1	41060.3	30470.4	31559.8	31062.2	33210.6	19513.7	19740	19518
M649T35			0.878212	0.253629	0.000132717	649.408	34.535						25286.4	23265.3	17067.1	25039.6	16550	14530.5	1764.72	1824.37	2492.19	11391.5	5278.56	8125.25	11048.8	11044.1	11357.6
M489T154			1.15338	4.53805	0.000132855	489.26	153.717						7281.9	9424.67	9761.26	4171.88	11321.8	3864.21	39098.3	36215.1	21095.9	22611.8	47469.9	41468.2	9233.19	9482.28	9236.13
M799T299			0.192337	2.21011	0.000133757	798.729	299.338						797.703	663.974	990.595	328.329	558.126	468.373	1318.91	1324.83	1751.65	1541.99	1199.1	1277.62	647.682	822.442	649.121
M789T402_2			0.409155	7.32955	0.000136477	788.623	402.014						59.9312	495.552	2033.66	405.491	33.4294	45.509	3044.61	5172.5	3542.86	2515.4	4987.41	3265.1	2016.39	2017.37	1935.45
M1039T287			0.224802	4.09411	0.000137098	1038.67	287.11						194.256	468.508	907.099	39.6856	193.355	121.095	921.842	1480.26	1521.54	1552.48	1245.84	1155.1	1008.75	988.048	988.35
M486T286			0.354274	4.68796	0.000137517	486.364	285.881						197.822	873.284	1764.34	471.132	419.055	401.9	2517.29	3453.14	4859.86	2645.14	2769.89	3104.4	2141.9	2144.01	2255.26
M584T33			2.34207	0.326202	0.00013797	584.419	33.195						149570	209133	121569	181980	154724	119742	22454.9	38215	27016.9	66009.7	64552.6	87311.1	115081	115083	115947
M791T362_1			0.416217	4.48807	0.000139571	790.944	362.089						780.541	636.666	2839.03	437.727	484.606	735.026	3384.36	4694.45	5256.57	6018.22	3639.86	3547.18	2784.33	2707.8	2705.61
M955T425			0.275398	2.02857	0.00014204	955.154	424.762						1609.38	1190.71	2043.62	1001.15	1407.19	1528	3628.14	3131.36	2580.23	2195.72	3171.27	3104.18	2097.06	2019.26	2095.65
M1190T192_1			0.487063	3.23475	0.0001425	1189.69	192.206						1639.94	115.721	4141.07	3450.41	1234.41	1809.77	7240.77	8616.54	5038.1	6383.79	6649.14	6154.45	3992.22	3866.76	3994.59
M628T488			0.224315	0.228879	0.000143333	627.999	488.314						1753.16	1214.55	782.333	1680.41	1302.61	1115.49	435.539	35.3701	134.622	600.401	281.997	308.439	779.79	746.299	746.46
M442T168			0.369955	0.514209	0.00014509	442.059	168.099						6812.03	6508.4	4666.28	5816.84	4624.96	5703.47	2211.4	3359.63	3366.17	3124.38	1910.88	3578.51	4606.53	4611.64	4701
M654T361			0.326404	0.134843	0.000145229	654.157	360.902						2335.75	3331.74	1492.45	3425.36	1740.33	1923.59	231.46	244.826	59.5985	635.037	304.025	446.468	1203.5	1203.48	1215.72
M118T348			0.698297	0.343218	0.000145979	118.085	347.853						22449.3	11068.8	12945.5	12926.7	15142.6	15551.1	5099.65	4601.76	4938.61	6239.8	5948.26	4090.36	7964.96	8559.67	7953.67
M424T141			1.00921	2.30835	0.000146983	424.34	140.506						12080.3	18286.6	22909.5	9950.84	16291.8	12061.8	36630.5	43065.2	28964	25390.5	38003.2	39347.6	22605.9	22571.6	20745.8
M326T60			0.86839	4.07209	0.000147846	326.101	59.911						6761.25	8893.75	9547.35	629.189	4383.01	1377.2	26479.3	17330.2	23422.4	13445.6	20105.2	27861.8	16443.2	17786.7	16528.2
M438T361			0.244996	0.35239	0.000148205	438.127	360.699						2353.29	2221.78	1393.83	1657.49	1365.31	1714.72	447.728	482.755	379.844	917.951	630.112	914.441	1340.57	1245.1	1213.17
M404T36			2.21444	1.41182	0.000149007	404.206	36.462						270404	260442	197308	254911	246323	277719	305681	345614	383091	364927	391732	336718	612934	621629	612870
M349T117			0.387265	3.28969	0.000149098	349.035	116.782						791.49	2098.65	2235.63	329.194	1582.53	1112.85	3693.58	4451.44	6435.87	3481.73	4513.55	4235.9	2795.77	2601.4	2607.58
M388T263			0.414051	0.231083	0.000149269	388.229	263.006						5176.27	4622	6441.69	2953.63	3279.05	3443.13	895.374	986.012	491.621	1107.44	1149.32	1358.93	1793.73	2147.69	1766.99
M460T411_2			0.462887	2.64138	0.000152008	460.251	410.666						2080.54	1948.75	5190.76	1749.56	1925.75	1855.25	6585.87	7472.01	4692.02	6180.85	6713.41	7317.88	4749.65	4972.56	4770.06
M1040T400_1			0.324917	5.56805	0.00015335	1039.93	400.49						55.9024	701.243	1715.66	115.74	22.8742	21.1663	2772.13	2798.8	3013.87	2225.64	2048.02	1799.91	1622.08	1558.65	1625.38
M243T241			0.303327	2.49965	0.000156701	243.21	241.446						918.82	1697.74	1730.76	1377.71	866.372	455.095	2813.96	3196.94	2039.36	3024.7	3642.61	2896.18	1352.07	1538.32	1350.47
M952T191			7.32078	3.48305	0.000157254	951.549	191.107						413450	158600	803759	11161.3	582980	516581	1.55294e+06	1.85463e+06	1.03217e+06	1.21072e+06	1.71889e+06	1.29134e+06	918829	911313	911280
M631T34_1			0.952721	0.246676	0.000159037	631.397	33.849						34525.6	22667.1	20343.4	16932.8	24168.6	22330.3	1424.49	3384.79	2309.09	11786.3	5267.9	10600.9	11208.3	14249	14224
M1193T172			0.440619	3.48816	0.000159588	1192.86	172.351						954.135	454.158	2336.49	2727.64	1776.9	826.309	4412.07	5743.73	3760.91	4956.29	7486.46	5297.81	3521.64	3502.86	3391.8
M226T361			0.210688	0.402788	0.000164206	226.037	361.038						1428.23	1857.45	1151.37	1935.52	1411.65	1227.25	296.478	781.313	699.81	732.199	445.283	674.621	1110.56	1084.6	1110.59
M789T78			0.260995	0.403226	0.000166119	789.468	77.573						2100.16	1922.89	3298.98	2401.88	2740.28	2626.5	960.048	973.885	349.63	1559.8	1187.03	1054.57	1160.35	1151.86	1221.94
M472T229_1			0.658541	4.16758	0.000167824	472.276	228.68						1094.86	3481.46	4805.34	4483.17	1724	681.841	14089.6	11480.2	6403.99	11122.2	15133.9	9579.42	8106.06	8106.86	7902.2
M955T355_3			0.389926	5.9621	0.000174184	955.496	354.769						126.599	1094.66	1504.18	516.887	153.552	194.914	3075.34	5150.97	4522.73	3747.73	2287.95	2623.98	2339.25	2342.87	2238.71
M690T304_1			0.251526	2.40316	0.000177487	689.712	303.55						1256.82	700.094	1478.39	347.538	1211.41	564.526	2349.32	2250.73	2698.09	1962.88	1790.03	2307.61	1372.92	1351.93	1375.08
M751T134			1.1978	2.79676	0.00017839	750.541	134.273						14496.5	12797.8	26748.9	7800.21	20301.2	10541.4	31750	49634.6	31911	54392.3	48245	43287.8	23235.9	22611	22485.1
M497T168			0.691181	0.495685	0.000178586	497.059	168.099						20951	23316.5	14235.3	20724	14652.9	18825.1	8933.35	8594.89	11421.2	9265.51	6783.63	10867.5	13997.6	13997.8	14136.3
M234T263			0.413531	0.208055	0.000180097	234.443	263.009						6205.38	3839.41	3188.03	2423.09	5239.76	4722.71	1272.7	426.563	740.987	1291.04	1002.93	595.816	2446.03	2386.9	2385.45
M444T168			0.567228	0.537845	0.000181505	444.056	168.099						16170.2	15876.1	11420.6	15549.4	10685.6	14812.4	7143.62	7039.65	9384.8	7504.38	5559.73	8823.44	10695.3	10588	10696.3
M503T168			0.468694	0.560294	0.000182932	503.049	167.801						11116.3	12143.4	7918.97	10469	8008.87	10158.5	5240.71	5015.77	6782.7	5147.82	4983.08	6343.95	8113.22	8172.95	8180.07
M420T169			0.409494	0.381606	0.000186374	419.551	168.818						5908.42	6345.99	4666.15	5432.49	4799.4	6507.47	2189.93	1259.2	3656.83	2336.69	214.515	3187.66	3852.37	3499.48	3571.19
M455T159			0.264537	2.45301	0.000186711	455.392	158.89						964.413	1050.12	1000.9	431.045	1252.35	1004.14	2725.25	2934.72	2718.17	1840.33	2044.13	1726.84	1603.37	1626.24	1603.57
M836T303_1			0.269345	2.63448	0.00018703	835.687	302.704						1217.48	773.662	1087.92	280.88	991.442	1403.38	2213.73	2227.87	3242.91	2817.6	1783.1	2875.55	1496.91	1592.19	1497.77
M599T245			0.623027	5.56375	0.000187271	599.376	244.713						597.656	3669.41	3275.84	1485.12	745.693	539.202	6207.57	9611.34	6630.26	14483.3	9457.63	10988.4	8332.45	8331.9	7909.98
M418T169			0.339135	0.398366	0.000187479	417.554	168.966						4816.28	4187.24	2816.93	3867.3	3362.86	4505.73	1497.51	947.582	2821.68	1782.56	1201.75	1132.97	2791.3	2694.48	2857
M585T33			2.62934	0.339078	0.000189747	585.428	33.1975						161664	258270	180809	283264	206805	156599	41041	59488.4	41561.4	89546.5	90141.7	101190	144355	149552	144367
M92T279			0.369089	0.382405	0.000192001	92.0486	279.171						4444.5	4992.15	3064.74	4332.95	3471.82	5899.3	1039.05	1624.07	1561.17	1635.33	1502.25	2659.24	3417.79	3417.1	3470.73
M404T451_2			0.412207	2.706	0.000200117	404.214	451.471						1639.08	3233.12	2659.82	2036.25	1107.77	1234.44	5771.16	7002.88	3945.39	5866.91	5670.59	3972.85	3586.05	3479.67	3585.7
M168T47			0.758106	0.419774	0.000201796	168.065	46.7665						18597.5	20821	15422.6	23607.1	25934.1	17813.5	6100.22	6203.25	4594.57	11926.7	10625.5	11844.5	17663.5	17687.7	18890.4
M238T382			0.394953	2.87424	0.000202726	238.045	382.325						2147.13	1434.73	1715.05	1167.62	1925.82	1920.77	4021.86	7171.3	4194.41	6039.49	4104.05	4105.51	3362.41	3304.92	3360.56
M846T401_1			0.436773	3.96319	0.000204224	846.141	400.606						786.587	1117.79	3193.1	241.695	1190.89	1164.7	3074.29	4338.86	4785.49	6747.69	5793.18	5756.28	3369.64	3414.3	3414.33
M565T319			0.912445	0.28436	0.000205982	565.154	318.771						20637.3	27751.7	14713.9	34124	22865.8	18754.1	6391.17	5442.28	3931.02	9433.36	7362.48	6922.14	14916.1	14925	15277.6
M705T366			0.262689	0.396477	0.000207446	705.127	366.072						2768.35	2391.56	1480.38	3035.03	2039.3	1980.92	596.667	815.597	973.365	1121.46	1005.68	917.188	1957.45	1921.4	1932.35
M559T243			0.623443	2.8475	0.000208838	559.266	242.568						2373.39	3727.39	8162.54	2178.94	4609.36	2814.01	11471.9	15115.1	8290.11	10868.2	11968.8	10243.5	6820.37	6340.38	6365.57
M835T302			0.273251	2.23368	0.000210892	834.692	302.074						1487.05	670.445	1755.01	544.593	1262.4	1547.3	2670.65	2806.55	3125.82	3174.76	2269.46	2184.48	1491.98	1464.32	1491.45
M1126T402_7			0.450424	6.74159	0.000211993	1126.32	401.982						192.157	1119.77	2261.98	345.182	142.929	130.584	3622.49	7329.86	4099.69	3355.66	5682.1	4174.99	2708.27	2622.84	2708.37
M520T203			1.69491	4.68265	0.00021546	520.28	202.884						15224	2226.52	40944	3746.28	16084.6	13169	72124.5	85088.3	36591.1	61702.6	92029.7	80432.1	3239.01	3376.48	3244.3
M1190T192_2			0.543725	2.85192	0.000218367	1190.19	192.192						1872.24	4572.15	4468.44	4572.15	1682.63	1984.82	11112	10909.9	5834.3	8361.04	10543.9	7860.1	4704.83	4719.4	4380.93
M409T66			1.29371	4.28353	0.000219157	409.136	65.593						5030.64	21773.3	22457.2	3161.48	6299.95	2758.34	54038.7	49966.1	55587.8	26257.9	38074.3	39430.9	27295.9	28093.8	28590.9
M1038T400_2			0.467892	4.46648	0.000220991	1037.68	400.085						111.639	1537.57	1899.75	284.677	3670.08	64.4254	6337.39	6996.47	6824.78	4222.32	5298.14	4123.81	3241.03	3185.41	3241.4
M133T157			0.443478	0.299333	0.000221443	133.048	157.441						4717.23	8791.43	5880.58	5095.61	4805.24	4848.25	953.675	788.702	2581.83	1572.55	2307.78	2014.18	3513.29	3756.06	3519
M573T190			0.618123	0.506044	0.000226407	573.487	189.681						16702.7	16112.8	9555.58	17616.2	15667.7	15533.2	6049.76	7132.34	8428.68	7175.16	6816.02	10543.2	11610.1	11345.8	11612.1
M1062T230			0.371481	2.88391	0.000226783	1061.51	230.161						1573.86	983.331	2644.61	26.6145	2022.37	1327.78	5129.16	4516.72	2856.57	3792.15	4279.9	4165.29	3168.04	3168.33	3195.41
M1192T168			0.403198	0.533465	0.0002272	1192.09	168.099						8086.52	8463.24	6964.73	7577.79	5412.87	7215.23	2981.79	4133.39	5465.82	3752.22	2594.33	4395.72	5596.12	5330.81	5599.86
M565T33			1.16908	0.431165	0.000229303	565.403	33.19						58144.6	54438.4	37824.4	52479.1	39268.7	36295.6	13951.6	16562.7	13028.6	23871.4	24090.1	28553.9	31292.4	31283.4	30336.7
M660T157			0.565094	1.49896	0.000231625	659.511	156.589						11323.1	13374.4	13494.6	11570.4	12184.5	10892.7	15437.5	18851	15355	19929.1	21394.8	18216.1	14795.3	14246.7	14799.4
M1190T236			0.822564	4.39172	0.000232357	1189.57	235.939						4902.67	2622.5	10233.6	508.263	3098.36	2374.52	20224.4	24680.1	10208.5	16420.7	16066.1	16659.4	11778.4	11390.9	11382.6
M1058T397_1			0.30528	3.39277	0.000233471	1057.69	396.503						281.162	1157.93	1837.26	624.863	299.101	424.508	2069.93	2888.58	2628.12	1889.9	3074.73	3139.69	1710.04	1699.6	1503.27
M799T377_1			0.312163	4.24564	0.000236501	798.864	376.731						368.73	435.391	1777.62	143.602	377.701	330.893	2167.37	3439.83	2001.63	2718.54	2124.14	2127.74	1448.26	1467.56	1467.98
M485T448			0.710658	2.53691	0.000237301	484.773	447.526						4479.41	6089.12	13258.9	4150.17	4733.39	4775.02	14449.8	17353.4	18583.7	16806.9	15973	11931.9	12285.9	11870.3	11870.2
M1036T181			8.03457	3.664	0.000237659	1035.64	181.03						518566	224512	1.08325e+06	8783.6	495624	468288	1.79821e+06	2.10689e+06	1.13026e+06	1.45354e+06	2.21093e+06	1.55581e+06	1.09713e+06	1.08433e+06	1.09724e+06
M530T245			0.358805	2.74514	0.000237891	530.336	244.638						1330.18	1801.39	3159.67	1087.43	758.997	582.782	3394.66	4215.14	4440.26	4852.69	3468.62	3567.49	4121.02	4574.35	4354.09
M603T168			0.516627	0.535168	0.000238442	603.065	167.912						14452.3	13553.1	9302.34	12340.5	9404.93	11592	5262.7	5869.89	8297.89	6519.87	5219.05	6637.61	9400.33	9454.76	9261.21
M363T361			0.19956	0.522563	0.000240012	363.033	360.837						2009.21	1475.54	1210.33	1711.17	1800.83	1804.03	863.811	601.388	715.999	1110.44	827.117	1112.68	1451.25	1412.44	1441.5
M257T263			2.23553	0.308336	0.000240685	257.147	263.006						193874	122270	121364	97199.1	204756	152065	60217.7	26900.7	37886.4	55985.4	57517.6	36382.2	120556	120246	126560
M664T168			0.395784	0.543923	0.000243319	664.057	168.168						7624.66	8091.92	6614.02	7293.45	4991.77	7671.97	3076.32	4123.71	4590.4	3697.61	2637.29	4875.98	5915.75	5914.36	5416.65
M806T302			0.263153	2.03155	0.000243365	805.673	302.175						1972.92	1456.13	1820.38	607.064	1536.37	1177.29	2687.63	2982.43	3248.18	3481.68	2293.69	2717.06	2108.42	2138.71	2139.24
M1041T400_3			0.368963	5.26175	0.000244614	1040.81	400.106						100.135	890.283	1754.07	834.311	22.2055	114.865	3751.35	3528.29	4718.35	2930.44	2588.76	2034.8	1862.08	1722.95	1862.14
M113T123			0.838767	0.422289	0.00024623	113.034	123.279						30913.4	23213.7	17233.9	17537.1	22931.4	29006.2	7589.34	10050.9	8611.98	8899.52	12774.9	11546.6	15252.8	16242.6	15245.7
M1055T396_4			0.329525	3.11117	0.000246823	1055.12	396.274						319.204	1991.11	1712.06	882.697	528.464	778.263	2751.29	2922.74	3069.88	2614.35	4518.26	3449.5	2099.36	2257.14	2099.1
M604T169			0.386904	0.406177	0.000246909	604.064	168.8						5750.08	6170.91	3718.18	5640.85	3685.52	5568.01	1868.8	1870.71	3314.8	2164.38	946.004	2237.33	3607.45	3615.73	3167.29
M347T58			0.766151	4.60797	0.000247359	347.131	57.9025						665.806	7578.66	6928.29	393.088	1790.62	2478.54	10168.5	14479.6	16520	18183.1	21093	10954.9	9442.63	10353.7	9940.26
M802T298			0.191105	0.3956	0.000249501	801.911	298.138						1297.84	1441.97	1121.49	1173.66	868.825	1172.71	521.207	523.238	73.0867	277.343	643.629	760.959	961.114	978.727	960.515
M1038T180			7.32043	4.18761	0.000250059	1037.66	179.72						352341	166790	814146	5490.07	363407	265938	1.46391e+06	1.58499e+06	777831	1.1175e+06	1.84191e+06	1.45554e+06	957977	957981	954623
M640T543			0.591086	3.45414	0.000252501	640.02	542.914						1265.42	2448.14	6143.45	1968.35	2735.28	2686.59	11822.2	6558.75	12099.1	11286.7	11245.3	6562.31	7551.47	7712.18	6947.39
M643T201			0.303975	3.14857	0.000252739	643.443	200.591						405.555	678.83	1582.7	1356.58	818.248	186.205	2054.19	2238.72	2383.22	3657.7	2967.22	2530.35	1793.79	1853.18	1853.2
M913T301_2			0.300464	2.50908	0.000253915	913.199	301.3						1306.17	652.15	2026.56	265.969	1192.9	1690.3	2744.95	3105.79	2533.98	3819.33	2687.09	3008.8	1748.93	1941.39	1942.86
M259T333			0.229534	0.331192	0.000255431	259.016	332.704						1846.99	1284.06	1275.05	1757.92	2367.43	1537.27	781.39	143.26	583.715	329.387	596.275	900.653	1239.97	1206.97	1240.38
M179T516			0.701852	0.370305	0.000256076	179.128	516.17						18089	19538.7	13264.5	9595.7	17626.8	15429.6	3847.6	4379.78	3486.59	9282.1	5749.72	7894.11	11225.1	10731.4	10728.3
M916T193			0.347734	2.97456	0.000258617	915.547	192.829						1676.77	476.414	2203.14	923.881	1200.2	731.06	3873.39	4015	2572.01	2934.55	4866.33	3189.66	2301.29	2364.3	2300.8
M138T279			0.410572	0.433916	0.000260022	137.634	279.48						6074.95	6615.75	4990.82	4942.16	4835.32	8074.98	2334.87	1998.64	1842.58	2328.38	2990.42	3923.88	4175.07	3749	3740.25
M700T414_1			0.232498	0.423698	0.000263387	699.901	414.397						2111.24	2043.29	2079.77	2437.2	1845.61	1134.11	718.318	712.405	612.023	729.006	1266.51	898.344	1713.49	1760.09	1713.71
M690T298			0.335245	1.66803	0.000264914	689.847	297.661						3703.61	2680.13	3216.54	2492.18	4504.45	3565.4	5187.56	4888.44	5083.33	6373.63	6474.51	5623.8	4993.65	4859.29	4868.75
M959T407			0.291005	2.41951	0.000265048	958.538	406.643						1354.26	1363.86	2259.15	965.895	598.444	645.175	2360.72	3248.74	3129.94	3455.67	2493.4	2700.03	2092.6	2149.71	2148.88
M707T169			0.464634	1.46642	0.000265515	706.586	169.362						10621.7	9082.69	10841.6	7160.31	9946.72	7806.57	12104.8	12661	12874.2	13873.3	14906.1	14907.8	10781	10781.3	10971.8
M1191T333			0.322632	7.32212	0.000269921	1191.24	333.493						68.3377	438.384	1007.68	403.633	37.2088	16.6951	2194.6	3392.2	1877.05	1469.46	3518.34	1987.09	1073.64	1030.13	1032.04
M545T447			0.24731	2.37949	0.000272805	545.219	447.468						774.797	1181.55	1266.33	725.622	730.903	665.268	1607.5	2149.07	1622.58	2366.33	2078.67	2892.96	1607.64	1566.47	1607.8
M391T287			0.223486	0.503842	0.000274255	391.101	286.511						2386.34	2353.91	1651.65	2508.32	2145.74	1610.01	1444.03	1177.18	817.108	716.211	1113.13	1108.95	1902.81	1884.12	1866.47
M854T99			0.422087	0.218495	0.000276569	854.488	98.932						4552.64	5950.01	5924.79	4519.39	5891.14	2126.63	784.945	659.947	237.078	1267.29	2558.25	821.117	2974.84	3055.88	3056.53
M525T227			1.25075	3.03548	0.000284889	525.3	227.127						17027.1	8453.98	29223.9	2977.85	17460.7	14383.9	50743	44248	30536.6	37888.3	60250.9	48092.4	31177.2	31177.7	31004.5
M599T33			4.13312	0.215888	0.000285147	599.409	33.195						386763	437319	289749	362607	682031	556594	36558.4	52532	30538.5	121352	134139	211030	269261	280053	269206
M647T454			0.469494	6.47336	0.000287969	647.362	454.167						409.086	351.521	2420.98	102.78	943.226	501.822	5398.36	4491.95	2641.76	5187.64	8060.84	4834.7	3275.75	3308.86	3308.74
M418T145			0.406063	3.56619	0.00029096	418.378	144.93						1256.41	934.915	2343.25	343.214	1771.43	996.477	5175.12	6438.83	2754.45	4510.26	4905.4	3481.96	2964.55	2964.8	3079.97
M874T169			0.382155	0.388121	0.000291468	874.075	168.759						6102.15	5545.03	3805.6	5115.75	3613.18	4891.44	2416.16	1602.89	2966.43	1233.62	528.142	2536.66	3501.22	3535.75	3501.89
M829T365			0.205234	0.321222	0.000292613	829.214	365.372						1085.63	1178.31	996.87	2037.51	1552.54	1154.12	472.366	499.493	230.545	428.094	390.046	550.83	983.423	983.403	987.107
M491T333_1			0.704595	9.98788	0.000293321	490.798	332.695						51.0553	2070.71	4381.59	169.317	18.6701	97.4943	5344.62	13086.7	9487.62	18049	11923.2	9915.02	6679.38	6679.07	6460.75
M632T356_2			0.315055	4.13034	0.000299859	632.361	355.599						176.432	1016.82	1220.58	714.725	278.203	392.51	3045.05	2905.05	1458.77	3229.54	3283.95	1769.92	1674.25	1658.63	1674.28
M550T33_2			0.694769	0.569699	0.000302277	550.413	32.546						27474.2	21284.6	18784.4	20002	28561.8	21989.7	12824.7	13309.3	9840.98	12877.2	13918.7	15902.6	22254.9	22254.6	20868.3
M387T36			4.2803	1.63361	0.000305924	387.18	36.458						730773	336098	543080	554970	675320	760278	912003	1.03628e+06	1.05462e+06	1.03847e+06	888484	951999	1.51828e+06	1.5182e+06	1.48633e+06
M851T189			1.4026	0.468603	0.000309228	850.543	189.392						74242.8	73291.3	45597	100094	74170.3	78160.1	35501.1	25660.3	36454.5	36071.3	36109.4	38992.3	45999.1	45995.5	46658.6
M962T302			0.267792	2.55231	0.0003103	962.189	301.884						1012.59	909.955	1986.91	386.286	626.317	755.954	2064.78	2073.78	2701.75	2812.28	2090.28	2749.17	1652.74	1652.79	1674.96
M559T268			0.358237	3.04374	0.000311585	559.307	268.031						422.941	1892.68	2794.88	994.578	669.838	405.654	4344.64	3683.44	3084.19	3359.76	4298.37	3085.42	2394.36	2424.72	2424.63
M873T188			0.844852	0.401595	0.000315752	872.528	188.488						26459.2	20770.7	14133.1	21380.3	26466.3	31531.5	8249.59	7227.8	9880.15	8471.28	9254.66	13437.4	17475	18087.2	18269.5
M104T184			0.633737	2.77278	0.000317739	104.106	183.819						3240.9	2985.9	8440.1	4055.84	4505.05	4041.61	8606.67	13901.2	10363.6	14230	11327.8	17182.7	8400.7	8840.58	8387.04
M442T130			0.578068	0.236468	0.000318426	442.314	130.059						5917.2	12307.5	8684.07	11692.9	13326.7	5860.07	1075.72	2425.28	2180.05	2083.41	2805.05	3095.61	5790.54	5877.31	5787.7
M157T284			0.597136	2.34777	0.000318468	157.097	283.918						6985.08	3370.86	7728.3	1955.19	5236.88	7883.5	10915.6	11318	14756.4	16709.3	13118.5	11033.9	8448.89	8336.8	8336.6
M526T395_2			0.339898	2.73655	0.000318593	526.302	395.007						723.771	1817.87	2860.42	915.923	570.586	675.326	3182.73	4097.02	3263.76	3872.95	3220.97	3061.54	3004.19	2895.96	2881.68
M1056T397_1			0.27939	3.00375	0.000319108	1055.69	396.73						306.943	1613.17	1547.9	527.578	286.861	374.972	1712.08	2652.8	2459.32	2298.15	2540.02	2327.34	1317.33	1234.32	1238.19
M291T382			0.357639	0.429584	0.000319589	291.068	381.726						5280.78	4552.11	2585.6	4675.47	5404.55	4107.23	1776.85	1470.62	1154.55	2455.86	2102.07	2469.43	3555.9	3556.4	3487.07
M479T491			0.123675	1.95554	0.000320083	479.092	490.936						406.383	308.337	427.515	147.865	268.81	351.219	548.762	764.63	521.057	580.222	703.737	616.93	430.457	440.254	427.658
M917T475_5			0.358287	5.8744	0.000322827	917.325	474.964						297.647	520.669	1060.04	475.238	459.45	431.372	3119.06	5173.61	1645.89	2780.39	3635.57	2704.47	1869.14	1910.68	1869.09
M520T231			7.99587	3.23157	0.00033231	520.267	230.619						678317	213002	1.09609e+06	39032.3	725910	629943	2.13385e+06	2.01255e+06	1.09881e+06	1.50369e+06	2.23645e+06	1.94477e+06	1.22463e+06	1.231e+06	1.23099e+06
M518T484			0.250339	0.361058	0.00033381	518.17	483.636						2427.02	1787.87	1436.08	1818.53	3024.51	1956.25	533.798	848.773	850.297	394.071	919.628	948.706	1550.16	1552.6	1445.65
M102T263			0.284012	0.478236	0.000335574	102.054	263.36						3399.43	3563.22	2903.1	2068	4419.75	3619.99	1424.46	1526.41	1655.77	1708.25	1751.4	1485.74	2514.25	2685.82	2618.02
M460T347			0.654597	3.66706	0.000341776	460.287	346.669						1545.74	4325.83	8269.43	2417.18	1235.95	628.038	11332.1	14861.9	8954.88	13467.2	10190.2	8748.96	8157.76	8159.02	7964.88
M498T69			1.15285	11.2183	0.000345248	498.205	68.893						1770.47	2374.39	5445.7	2073.8	1963.09	2307.3	18584	40274.7	49133.2	21930.7	29238.4	19599.9	11174.9	12095.9	12082.1
M1128T403_2			0.319645	4.75847	0.000346151	1128.03	402.781						19.5164	1021.62	2021.25	43.5142	18.5863	20.8648	2524.15	2281.74	2727.23	2549.76	2966.22	1917.98	1729.08	1633.14	1703.95
M1046T229			0.51763	4.26257	0.000350232	1045.57	229.398						1731.96	888.251	3770.83	66.3958	2044.73	1259.93	7500.15	7527.15	3395.59	5736.51	9503.05	7949.13	4274.61	4223.52	4275.02
M601T169			0.338248	0.3934	0.000351933	601.067	168.532						4842.58	4857.75	3018.97	4050.16	3256.25	3709.63	1292.5	1141.08	2875.18	1859.26	529.836	1639.62	2779.48	2648.17	2777.87
M877T487_2			0.297703	0.491807	0.000356502	877.465	486.971						4547.92	3259.69	4105.47	3797.82	3171.53	3324.17	2805.27	1166.19	1238.5	1339.21	2360.45	2011.74	2267.33	2265.74	2420.01
M340T168			0.508987	0.602724	0.000356748	340.046	168.099						15198.6	14781.3	11271.2	13042.3	10378.1	14234.8	6289.1	7974.64	8126.23	7870.92	6870.62	10427.2	11233.2	10969.4	10963.9
M367T381			0.585255	1.73542	0.000357963	367.066	380.872						6854.28	14932.4	7831.04	8270.75	11957.9	11243.1	18334.3	15173	20106.2	17251.5	17104.9	18046.2	14134.9	14208.5	15137.6
M566T30			0.574249	0.39297	0.00036164	566.478	30.486						8979.63	13578.7	7016.72	14903.2	9957.66	12143	5088.19	4204.49	4115.86	5251	4903.31	2600.7	7152.43	7041.86	7151.93
M654T169			0.31827	0.367741	0.000363717	654.072	169.054						3299.86	4300.86	2186.07	3399.61	2539.92	3705.11	1014.52	1049.92	1677.42	1575.56	217.23	1611.09	2140.49	2122.33	2113.17
M1129T402_2			0.395246	5.22014	0.000364245	1129.17	401.985						84.1103	1733.93	2052.87	277.657	238.677	57.5731	3093.32	5892.17	3799.64	2563.15	4132.42	3721.85	1822.19	1906.59	1822.7
M379T157			1.43638	5.57417	0.000364286	379.258	157.347						2009.59	6209.39	36419.5	3311.8	2822.98	2846.15	35949.4	62010.4	66941.1	51183.2	33907.6	48892.2	30705.2	32435.2	30709.2
M1040T230			1.13531	5.01472	0.000364397	1039.53	230.037						7122.29	2226.26	14558.5	298.23	8933.57	6052.79	38922.8	41362.2	14983.3	24305.8	43511.3	33449.5	17569.2	17407.7	17483.5
M683T291			0.300862	2.04226	0.000364791	683.28	291.043						1351.98	1749.99	2556.43	1116.89	1618.97	1775.19	2639.77	4222.7	2919.47	3118.23	4097.49	3770.95	2773.85	2652.26	2749.72
M558T230			0.552472	2.14759	0.000365495	558.216	230.11						5977.34	3056.44	8193.72	1131.9	6694.18	5537.44	11941.4	11796.1	9909.06	9903.35	11345	10802	10230.1	9826.29	10221.7
M416T372			0.838057	3.17417	0.000366968	416.261	372.206						3146.3	9381.88	14299.1	5346.62	2857.86	2267.7	22647.7	23189.1	20366.6	23057.1	14926.4	14208	11537.1	12937.9	11495.5
M331T355			0.812729	3.6933	0.000368882	331.233	355.361						1636.44	10548.9	9465.22	4065.32	1910.6	1625.99	15545.4	23017.4	13056.5	23557	18867.5	13994.2	11182	11293.3	11113.8
M180T516			0.335534	0.350422	0.000369022	179.63	516.221						3864.91	4595.37	2975.54	2428.53	4077.87	2994.38	601.179	692.016	683.783	2195.21	1399.14	1765.33	2505.67	2412.95	2554.07
M391T168			0.390817	0.443856	0.000369531	391.052	168.451						6463.86	6202.18	4570.24	5722.82	4713.62	6515.27	1314.33	2485.9	3942.95	2362.49	1184.33	3884.54	4056.53	4179.89	4180.63
M1135T349_2			0.372525	5.56168	0.000370013	1135.33	348.579						281.869	557.221	1466.59	827.203	292.342	154.688	2945.93	4892.42	3737.28	4207.1	2304.02	1823.56	1865.44	1923.68	1924.12
M637T482			0.325332	3.12105	0.000370208	637.366	481.526						213.179	1210.42	2631.07	471.192	526.923	585.754	2874.68	3182.36	2745.58	2534.38	3134.35	3126.81	1964.18	1820.94	1827.07
M251T232			0.279936	0.513658	0.000370747	251.043	232.106						3846.81	3918.2	3544.55	4124.54	4892.33	2419.39	1774.87	1671.13	2034.34	2355.98	2174.32	1672.93	3583.43	3516.34	3582.07
M506T361_1			0.213268	0.422784	0.000372296	506.097	360.699						1442.62	1786.15	1458.38	1582.03	1901.35	1392.63	402.447	366.675	281.215	1111.92	780.877	1100.02	1372.58	1372.54	1325.3
M766T136			0.693402	2.22148	0.000372385	765.561	135.774						5845.53	12331.4	11945.1	3879.85	7596.58	5976.49	13747.4	20891.9	16586	15076	19798.6	19587.2	10139.7	10963.7	11003.2
M600T408_1			0.683497	8.39629	0.000372522	599.856	408.385						443.744	1450.85	3657.68	861.285	780.002	492.517	10331	14055.7	4716.3	14717	14008.9	6705.69	6276.08	6045.49	6276.23
M649T361			0.123603	0.54026	0.000372981	649.16	360.931						543.253	783.21	866.564	643.659	811.37	628.849	316.486	436.347	259.093	375.509	423.149	500.057	668.596	676.689	676.681
M387T304			0.540261	3.55997	0.00037427	387.271	303.982						409.903	3412.23	5858.86	2852.74	451.845	486.883	7916.07	8840.2	9033.88	4997.01	8462.23	8712.24	4878.02	4972.15	5532.18
M1199T37_1			0.629123	1.82161	0.000374342	1198.73	37.0985						9893.67	8518.69	12084.3	13347.5	7962.65	8317.85	15598.3	19455.8	23612.7	18787.1	15099.1	16970.9	13403.7	13923	13923.8
M607T77			0.951073	0.241368	0.000375496	607.253	77.33						35780.1	28809.4	23045.6	28647.3	20164.2	11259	2872.08	5301.94	5962.75	6013.59	6226.63	9274.44	22056	22078	24564.4
M398T88			1.19058	0.214207	0.000375788	398.148	87.586						24672.7	56328	32672.9	39616.4	25393.7	34643.1	3055.39	5784.13	3167.81	6850.8	7926.97	18911	23356.2	29397	29504
M941T175			2.01356	5.08915	0.000376224	940.601	175.408						1633.76	17772.9	84484.2	5095.26	1627.71	2776.25	68641	107817	89033.7	109141	101178	101249	71992.2	66461.8	66354.5
M721T169			0.321011	0.391287	0.000377102	721.053	168.734						3889	4385.46	3233.5	3419.48	2646.62	3777.72	1109.83	1175.33	2626.21	1349.04	200.5	1893.75	2334.17	2203.43	2210.79
M811T418_1			0.875439	9.07976	0.000384472	810.927	417.969						559.073	1980.12	6458.72	776.5	963.171	748.692	11984.9	29422.2	14577.7	21511.8	15075.5	11720.6	10540.4	10723.7	10540.3
M758T167			0.412671	1.46521	0.000386066	757.621	167.262						7720.63	6359.33	8275.42	5561.96	9303.7	7276	10230.5	12619.6	10545.4	11023.9	10246.8	10531.2	8597.39	8599.35	8800.58
M986T403			0.356207	7.67212	0.000390585	985.901	402.55						74.316	464.074	1428.2	198.162	20.9707	75.3308	2198.79	4900.77	2721.42	2142.87	3093.68	2289.51	1572.9	1487.8	1574.7
M872T169			0.363715	0.369881	0.00039212	872.075	168.818						5026.26	5047.53	3318.02	4740.64	3291.68	4766.67	1522.42	754.381	3276.71	1572.11	521.678	2040.19	2774.86	2771.38	2838.15
M241T319			1.29693	0.406781	0.000392426	241.154	319.244						62704.1	52042.3	61005.1	56748.2	76536.5	74503.3	11068.8	11014.7	49658.6	20349.6	30965.1	32959.7	38344.2	39986.6	38309.3
M1186T345			0.311712	4.88517	0.000393416	1186.18	344.77						26.329	1365.36	1230.74	247.462	26.7996	32.7927	2583.07	3435.43	2568.78	1959.15	2101.03	1663.56	1289.98	1290	1283.99
M476T283			0.849043	2.94498	0.000393913	476.275	282.812						11393.6	6073.36	9906.2	3156.12	6673.87	7509.37	19041.1	21188.2	12384.9	26928.1	29952.3	22182.9	13481.2	12837.1	13508.6
M434T399			0.363717	2.39702	0.000395847	434.26	398.714						1322.29	2908.78	3039.11	2135.89	1392.83	728.517	4210.92	3948.64	4541.63	6135.98	3844.19	4950.08	3502.93	3646.63	3648.6
M621T405_1			0.192535	2.83938	0.000396032	620.857	404.89						236.44	456.846	954.318	206.898	219.463	415.377	1262.31	803.139	1256.6	1139.82	1143.1	1463.22	967.609	947.646	967.452
M1035T400_3			0.453287	4.15669	0.000396793	1034.93	400.087						115.339	1662.68	2090.69	361.101	3446.07	90.738	5720.91	7263.51	6265.13	4970.58	4776.03	3287.26	2578.42	2503.89	2506.08
M988T403_1			0.470211	3.73849	0.000401706	987.526	403.365						1004.61	1093.73	4798.99	1724.54	416.334	761.634	7990.22	4455.54	5595.57	6966.79	4865.89	6762.67	3414.49	3439.3	3414.45
M1016T233			0.267743	3.78268	0.000404916	1015.53	232.846						425.821	344.533	1330.61	105.918	509.936	282.596	2156.24	1924.95	939.678	1888.55	2358.09	2078.31	1210.05	1087.03	1087.17
M387T65_1			8.21489	5.80099	0.000407403	387.154	64.943						27983.5	853844	765660	29593.6	26387.4	14219.1	1.00986e+06	2.17893e+06	1.94139e+06	1.47737e+06	2.16469e+06	1.19205e+06	931060	969161	969155
M362T101			0.72495	3.93953	0.000407487	362.123	100.558						5291.67	5176.85	5711.9	1098.16	1007.61	4263.97	13819.6	15670.7	15974.8	21911.5	14342.1	7118.33	13463.8	14226.7	13467.3
M641T270			0.235048	3.26502	0.000407842	641.405	269.672						110.483	971.439	831.571	299.92	665.535	37.6397	1819.54	1854.3	1939.7	1552.25	1208.86	1148.06	1470.15	1342.25	1472.14
M628T243_2			0.406825	3.37811	0.000407913	628.403	242.584						301.393	3551.44	2526.45	1505.27	377.777	213.321	5238.78	3981.66	5585.3	4584.85	5463.92	3777.19	2552.57	2603.99	2554.18
M1012T301			0.222734	2.63495	0.000409758	1011.67	301.272						564.791	264.559	1179.02	161.128	634.04	878.038	1505.18	1567.89	2095.82	1752.04	1251.63	1528.19	835.202	833.302	863.118
M179T423			0.408317	2.94322	0.000410552	179.021	423.444						1085.67	2560.73	3894.83	347.798	1284.89	1090.12	5085.8	4569.52	4696.34	3758.37	6002.94	6096.38	2701.8	3112.98	3104.79
M445T33			0.47095	0.550464	0.000417166	445.309	33.189						11849.6	11210.4	6986.46	9079.39	11744.2	10797.8	5650.82	7011.64	6223.34	4838.78	6223.75	3997.59	9061.11	8670.85	9064.84
M514T333			0.427355	4.44534	0.00042598	513.809	333.493						169.713	1514.01	2577.64	638.943	869.014	433.086	4364.61	3827.89	2803.22	4766.93	7146.14	4663.03	2744.33	2631.77	2628.41
M544T228			1.72412	3.18232	0.00042676	544.266	227.669						22509.3	21635.2	67532.8	4406.54	28769.7	16064.8	91519.4	55352.4	77733.2	86809.5	107095	93584.5	58871.5	58482.2	58485.3
M539T228			0.363893	5.39416	0.000431168	539.362	228.491						404.672	275.927	1906.06	164.283	588.89	295.243	2022.4	3193.17	2306.48	4851.7	3047.21	4187.23	2785.71	2636.18	2636.51
M550T168			0.453383	0.516371	0.000435179	550.063	168.168						10049.9	10363.7	6627.78	9444.06	6359.19	8714.71	4273.47	3980.13	5622.38	4031.69	3150.8	5565.3	6630.09	6340.62	6629.56
M585T284			0.858161	2.99858	0.000438259	585.293	284.054						14361.9	2391.8	11294.3	1226.14	6505.55	9426.16	21502.3	28039.3	13738.8	21840.8	26298.5	24133.5	16058.5	16121.7	16132.3
M461T491			0.124322	2.01027	0.000440995	461.08	490.733						383.211	215.986	326.634	104.806	527.756	307.74	679.322	617.013	646.185	611.977	639.065	557.869	411.613	426.495	415.14
M495T168			0.398052	0.575729	0.000442902	495.062	168.099						8509.48	8772.4	6481.43	8377.89	5761.55	8724.88	2899.19	5043.81	4951.33	4933.13	3956.48	5060.95	6364.99	6707.85	6366.34
M205T173			0.412953	0.401855	0.000442933	205.033	172.857						6119.93	8108.78	5576.92	5492.11	3372.05	5643.26	2700.59	1614.27	2700.1	1781.97	1889.56	3102.37	6630.95	7149.35	7142.68
M786T475_2			0.41668	7.29216	0.000446335	786.136	475.276						251.87	707.563	1295.46	408.747	396.892	368.733	4539.98	7179.79	2424.1	3013.83	4323.36	3525.66	2152.12	2025.75	2023.88
M156T263			0.776674	0.432389	0.000448698	156.041	263.017						29372.5	17307.2	17790.7	14904.6	24934.5	25106.7	11131.8	7997.34	9654.65	9933	9894.73	7346.51	17150	17150	17201.4
M517T427_2			0.355897	2.64913	0.000449025	517.271	426.706						981.669	2334.21	2457.28	1813.18	1037.47	968.083	3570.74	4404.04	3738.53	3705.35	3696.84	6294.71	2252.44	2246.89	2455.92
M829T125			0.510952	0.408153	0.00045185	829.277	125.093						9798.79	8274.4	7820.1	7249.6	11170.1	8269.47	1840.15	2488	1130.93	4999.87	4925.24	6077.47	6737.44	6595.97	6597.33
M493T126			0.710475	9.74748	0.000454024	493.132	126.314						696.615	530.832	902.387	3200.54	894.013	1067.67	6232.58	17199.7	7636.6	17807.8	13354.4	8848.09	8323.54	8568.48	8322.57
M222T414			0.411201	0.204439	0.000455303	222.06	413.6						3432.13	5868.17	3091.41	6500.23	5156.04	2566.34	438.076	1234.24	402.12	1523.01	1227.28	616.296	2852.81	2783.02	2853.44
M1045T230			0.581227	4.45606	0.000459754	1044.56	229.978						1731.99	1691.05	4533.31	348.186	2295.44	1284.95	9409.29	10772	3677.49	7088.79	11659	10353.3	5215.99	5232.98	5244.96
M868T397_1			0.242699	4.02756	0.000462352	867.972	397.441						175.004	424.988	934.181	154.788	241.435	327.702	1432.92	2375.3	1408.3	1165.91	1622.21	1089.97	1044.2	1090.84	1090.73
M1018T232			0.361419	4.20936	0.000464737	1017.54	232.196						541.736	774.725	2125.61	115.621	821.857	383.699	3302.87	3449.99	1575.38	3187.67	4544.63	3989.71	1925.74	1925.68	1951.03
M362T448			0.358521	2.88617	0.000466444	362.203	448.152						1040.82	2556.91	944.806	1803.47	986.953	1044.48	3356.87	3558.6	2867.06	3809.88	5844.98	4741.29	2850.26	2502.65	2455.74
M726T252			0.420005	3.30506	0.000466857	726.381	251.615						794.32	1253.66	3882.26	956.79	1195.53	652.216	4186.25	4325.17	3604.8	4606.51	6504.27	5641.94	3644.06	3519	3668.17
M600T408_2			0.583778	8.22174	0.000470269	600.358	408.436						449.911	511.762	2740.67	914.365	588.116	601.228	7989.04	10728.7	3362.64	11193.3	9712.22	4750.06	5139.65	5055.44	5055.28
M235T262			7.24946	0.141911	0.000472554	235.165	262.427						1.87662e+06	909879	922301	547397	1.46527e+06	1.52214e+06	238669	97856.2	133167	219064	245044	94151	646224	646238	641025
M716T168			0.375169	0.473638	0.000473616	716.062	168.492						6723.73	6681.37	4533.26	5906.33	4492.56	6047.42	2176.58	1982.63	4468.07	3481.97	1706.47	2470.14	4229.73	4143.89	4229.64
M583T238			0.369877	1.47367	0.000474021	583.323	237.653						7390.05	6775.87	5997.85	4997.3	4829.7	7191.08	8976.92	9706.61	10101.3	9345.38	9131.55	7531.88	8287.79	8063.23	8062.47
M198T382			0.395489	3.09228	0.000474704	198.052	382.347						1960.49	1426.85	1542.78	1090.65	1756.3	1782.91	3644.86	7236.55	3733.78	6607.36	4319.46	4020.16	3052.07	3051.62	3148.48
M136T421			0.882629	1.84365	0.000476207	136.061	421.012						21713.5	16808.6	24648.9	6726.09	18629.6	22731.6	36418.7	35527.4	36203	26262.8	35773.3	34936.3	26074	26023.4	26065
M251T48			2.56709	4.11021	0.00047742	251.084	47.51						30882.9	53573.2	111038	9920.01	26217.1	14297.6	168681	253586	158447	125711	184772	119624	90404.6	92189.4	90401.9
M551T169			0.43318	0.400626	0.000478423	551.061	168.512						8170.93	7050.17	4356.06	6884.65	4734.76	7090.19	2479.3	2422.08	4170.51	2449.52	833.306	2983.97	3922.51	3922.28	3956.98
M174T124			0.532467	0.359653	0.000481176	173.518	124.074						10456.9	7819.21	5461.45	6434.67	9524.05	12420.1	2790.63	2931.95	2713.59	2566.71	4252.51	3488.42	6334.73	6573.51	6581.25
M566T250			0.2536	0.637667	0.000481508	566.223	249.676						4124.35	3385.23	3996.2	3578.49	3837.69	3597.69	2863.64	2107.76	1780.41	1826.42	3255.22	2526.57	3336.23	3497.46	3336.13
M221T261_2			2.72681	0.267461	0.000484606	221.186	261.116						166178	300072	165080	273364	133889	164132	58337.9	36669.1	30012.5	71987.4	76289.9	48382	144409	144380	141815
M542T230_1			0.96744	2.3619	0.000485631	542.247	229.978						15772.8	7074.35	21417.6	1906.56	18532.7	15542.3	36121.7	37853.2	29386.3	24629.6	30868.1	30674.9	25297.6	24015.9	25287.4
M285T168			0.387016	0.612453	0.000486211	285.046	167.852						10366.3	8278.84	7484.7	7902.52	6718.54	8175.09	4961.08	5839.44	5750.57	4019.69	3756.63	5637.42	6924.54	6959.1	6924.97
M534T230			0.18406	0.564191	0.000486439	534.154	229.518						1670.67	1858.37	1880.11	1451.29	2310.81	1889.71	1124.12	1316.6	1342.8	924.685	696.657	835.64	1675.93	1600.6	1604.54
M216T262			0.229931	0.389754	0.000490018	216.17	261.751						2267.45	1617.27	1167.35	1232.55	1641.83	2304.93	587.58	667.401	596.1	702.138	874.794	559.711	1229.21	1226.78	1132.26
M923T400_2			0.341487	3.94032	0.000490195	922.717	399.927						133.899	909.38	1367.34	399.463	2016.29	29.5985	3153.52	3727.42	4504.45	2194.14	3143.35	2411.16	1592.11	1570.28	1507.21
M648T428_1			0.295313	3.43239	0.000493299	647.79	427.979						357.028	656.471	2160.47	479.718	106.845	311.552	2527.2	2615.77	2434.97	1849.73	2388.84	2160.49	1797.51	1667.76	1667.56
M776T482			0.121269	0.540277	0.000494482	775.913	481.891						735.958	631.789	634.809	812.214	616.372	601.103	437.508	179.173	343.163	260.686	480.805	477.193	600.09	646.02	643.609
M662T168			0.468542	0.596245	0.000495875	662.06	168.099						12396.8	13672	9954.48	11806	7831.22	11653.6	5955.35	6949.32	7515.29	6844.91	5530.57	7340.21	9301.32	9305.91	9475.31
M593T66			21.2239	0.104182	0.000500329	593.276	65.592						1.18261e+07	1.31731e+07	1.27302e+07	1.39913e+07	6.36797e+06	3.25013e+06	337638	729366	1.01343e+06	602567	1.02437e+06	2.68301e+06	6.94061e+06	6.93881e+06	7.00739e+06
M590T281			0.293598	2.05191	0.000501667	590.326	281.171						1634.12	2360	2531.17	1114.66	951.485	1173.29	3181.02	3604.13	2470.72	3867.37	3547.63	3365.5	2615.62	2615.54	2701.96
M1023T182			0.677904	2.66057	0.000505193	1022.63	181.601						6957.4	2667.85	9025.42	809.939	7486.95	5594.69	16074.2	12885.1	11580.6	12655.8	19905	13480.2	10675.3	10064.3	10054.5
M190T149			2.55719	2.51816	0.00050539	190.049	148.811						37661.4	86191.9	179523	29219.6	68241.3	91476.2	170239	240296	212636	199079	233184	184286	155290	171124	170925
M571T236			0.476206	3.41561	0.000506226	571.38	236.013						800.307	4383.96	4067.34	1130.18	439.376	475.048	5262.72	5856.93	5077.58	6776.81	7512.43	8096.95	5333.44	5175.93	5128.08
M868T436_3			0.273178	2.3728	0.000508971	868.487	435.925						954.368	1199.43	1758.32	691.099	728.137	1074.32	2561.09	2578.21	1773.35	2467.1	3583.44	2236.21	1574.42	1573.05	1573.43
M478T452			0.241149	1.88444	0.000511585	478.226	452.064						1036.49	2068.02	1403.74	1413.9	1046.09	986.742	1998.91	2931.29	2088.75	2736.17	2837.88	2397.71	1595.05	1600.32	1739.23
M323T89			1.20388	2.51127	0.000512999	323.257	89.4095						15052.2	15950.7	35089.6	10930.4	17960.4	19045.2	45426.8	40347.2	34113.1	50051.5	49338.8	67078.8	32787.3	33525.4	33518.1
M665T65			0.415047	0.415336	0.000517544	665.279	64.907						8632.35	6936.29	6853.56	6183.52	6697.69	4816.54	406.55	3956.96	3699.29	3367.76	3680.74	1551.95	6087.08	6005.54	6005.77
M371T42			0.671277	0.379265	0.000520134	371.147	41.603						13479.8	19799.7	10335.2	17957.7	22367.4	12522.2	5845.01	6087.59	4989.32	8367.03	6720.06	4575.64	10098.2	10511.7	10123.2
M155T55			0.570555	0.372515	0.000525684	155.088	55.166						11721.9	10563.7	6458.87	13708.8	12675.9	11576.7	8530.77	4146.41	4227.06	2509.27	3125.96	2309.5	3395.57	3195.39	3198.39
M838T151			1.20918	4.36386	0.000525688	837.566	151.433						3565.64	9866.71	28204.5	3813.62	3064.99	3686.95	18128.2	44567.6	35652	41008.6	45410.5	43037	20705.2	20145.6	20698.3
M986T402_2			0.47829	7.15731	0.000527509	985.651	401.985						56.3582	1167.54	2734.15	364.404	75.8849	117.453	4134.55	9262.71	4318.31	3875.4	5485.09	5244.82	2789.06	2791.03	2891.02
M863T300_1			0.697271	1.84341	0.000528841	862.715	300.03						14496.4	8314.05	15516.7	4878.09	10983.4	16590	21174.3	22787.4	22343	23144.3	18675.7	22349.5	15693.3	15414	15409.9
M82T66			1.23962	2.15009	0.000536868	82.0518	66.484						20323.8	24973.5	24611.8	13778.3	32506.9	43782.3	56372.6	69037	71453.3	45969	54413.8	46718.1	29789.6	34056.5	34113.9
M913T301_1			0.252731	2.09772	0.000538155	912.703	300.742						1373.29	757.901	1881.87	423.413	831.33	1864.8	2253.13	2610.56	2624.37	2681.72	2272.36	2520.08	1737.68	1737.34	1838.67
M262T441			0.61281	2.92349	0.000538169	262.139	441.104						2547.3	4503.46	8105.49	3793.44	2254.88	1756.52	9985.87	12235.3	7001.9	15398.3	11045.1	11460	8182.56	8138.71	8138.71
M728T448_2			0.262148	2.83048	0.000539259	728.398	448.381						500.2	1096.45	1388.35	678.051	295.994	563.734	1601.48	2618.57	1422.86	1992.58	2625.6	2540.51	1379	1394.45	1394.25
M365T159			0.440436	4.68619	0.000544025	365.241	159.206						85.8653	1803.69	2411.68	1151.31	241.567	494.24	4635.3	7279.43	5293.53	5632.26	2909.42	3249.89	2720.55	2724.53	2954.64
M181T33			1.19869	0.461642	0.00054693	181.121	33.176						62550.1	63916.3	51492.2	56146.9	42934.2	35997.2	17020.1	21357.5	12830.3	30317.5	29280.2	33705.4	36439.5	37895.3	36427.8
M401T297			0.33948	0.266608	0.000552809	401.061	297.469						2604.93	4152.41	2338.35	4347.86	2832.9	2141.85	608.547	218.924	125.391	1217.92	1325.99	1413.71	2281.65	2281.67	2292.43
M982T470			0.389364	4.49693	0.000560664	981.522	470.438						679.118	714.377	2258.15	549.019	566.306	618.747	5016.63	4702.25	1500.69	3295.65	4907.55	4796.41	2294.87	2356.41	2298.05
M983T437_5			0.419741	4.55869	0.000561661	983.34	437.128						508.081	1750.12	1192.27	867.56	831.624	819.242	5915.9	7081.89	4254.4	3147.28	4227.66	2583.2	1933.55	1933.57	1931.22
M374T375			0.198738	1.63494	0.000562892	374.045	374.512						1333	1689.18	1760.53	907.313	1041.83	1192.09	2345.2	1933.7	2466.01	1886	2215.46	2108.79	1852.18	1820.26	1851.97
M428T382			0.343893	2.47594	0.000564604	428.25	381.621						1241.82	2199.66	3156.45	830.466	1088	976.725	3056.68	4990.68	3680.77	4396.18	3373.98	4006.06	2513.23	2534.43	2512.84
M513T147			0.4283	2.61004	0.000565982	513.27	147.18						1105.85	3903.1	3628.92	2820.59	1204.3	1139.28	5172.64	4455.32	5466.24	5855.18	7463.21	7611.34	3432.98	3894.72	3891.8
M262T391			0.261971	0.431177	0.00057246	262.128	391.117						2891.23	1898.28	1583.81	2193.48	2547.31	3359.38	1277.11	822.466	1036.85	849.586	1142.52	1112.1	1800.63	1698.25	1698.11
M1025T155			0.425859	4.46131	0.000579795	1024.59	154.659						836.124	805.824	3056	142.3	572.763	998.11	6123.96	5035.89	2185.54	3791.72	6035	5429.89	3865.15	3864.29	3823.59
M542T344			0.42568	3.11068	0.00058154	542.292	344.083						689.808	2806.33	3835.44	1625	672.536	384.032	3637.43	5498.6	4175.65	5486.78	6346.83	6002.43	3296.16	3365.24	3367.14
M452T153			1.27888	3.19172	0.000581954	452.347	152.719						5047	16477	42849.4	7355.64	5681.22	7070.31	46540.5	47625.4	42564.5	50988.3	39500	42419.4	27249.6	27870.7	27256.9
M672T152			0.355248	0.494613	0.000585227	672.422	152.002						6382.68	3956.18	4580.86	4436.35	6271.37	5660.55	1746.29	3323.06	2569.91	1471.35	3013.11	3351.73	3629.73	3396.24	3634.12
M263T340			0.3287	0.392215	0.000586475	263.073	340.278						3915.7	3811.01	2830.79	4789.09	5306.85	2621.24	1529.12	616.674	1355.14	1871.53	2042.62	1713.59	3533.33	3585.52	3533.86
M950T192_1			0.403364	2.20607	0.000588817	949.53	192.201						2970.54	3945.86	3140.4	586.62	3240.33	3125.39	6208.16	8413.05	4530.74	6275.77	6129.16	5966.37	4303.25	4515.94	4451.11
M981T471			0.374278	4.66087	0.000591921	981.021	470.736						488.425	842.7	2033.29	351.799	392.394	579.777	3410.27	4461.67	1677.25	2751.79	4999.64	4551.37	2044.08	2018.39	2018.24
M765T300			0.839448	1.78686	0.000592393	764.737	300.03						23492.4	13177.7	23861.7	7818.84	17450.1	24623.7	31137.2	33843	33509.7	35197.3	29384.9	34241.3	23905.2	23904.9	23818.4
M562T305			0.170206	2.25697	0.000594967	561.72	305.438						387.458	364.894	717.491	201.279	347.327	915.274	1048.43	1150.07	1139.86	1179.02	844.592	1259.35	684.737	577.6	686.44
M139T441			0.458985	0.382687	0.000595499	139.002	441.013						8679.2	6172.17	3703.9	7253.02	7673.47	6649.88	1847.01	1606.16	1237	3922.99	3008.31	3736.39	4678.85	4655.33	4655.35
M111T441			0.339858	0.414571	0.000596535	111.007	441.013						5085	3625.68	2483.06	4233.02	4361.76	3762.59	1009.19	1148.66	831.146	2656.3	1969.02	2149.3	2773.23	2764.16	2764.16
M914T153			0.895746	5.69593	0.000597673	913.554	153.37						1162.82	4557.21	10572.7	2402.7	1204.44	1224.57	10149.7	31280	13962.3	22122.5	21047.2	21761.6	8702.55	9678.82	9681.26
M356T157_2			0.548206	3.57457	0.000597816	356.261	157.189						5812.81	851.578	5825.23	1395.64	331.123	711.569	6356.25	11598.7	8055.14	8724.04	8319.01	10307.8	5611.13	5294.98	5619.9
M593T104			3.88442	0.0560098	0.000600391	593.275	104.111						591966	321048	315067	392452	387403	86171.2	8513.47	13393.6	16798.8	13533.5	20059.3	44991.8	253180	307761	251722
M282T409			0.159774	1.91067	0.000602289	282.034	408.983						676.057	711.439	389.898	780.171	632.242	435.266	1077.93	1272.22	991.264	1557.92	1052.11	974.867	872.133	887.817	865.037
M505T168			0.332597	0.397953	0.00060276	505.047	168.451						4607.73	4874.4	3530.58	3796.46	2690.19	4159.06	1041.09	1381.13	2832.82	2087.77	290.378	1781.75	2741.87	2739.78	2882.78
M1195T335			0.36444	4.80122	0.000604727	1195.05	335.224						179.058	1077.86	1950.07	737.006	134.932	198.28	2285.2	4967.05	2997.7	2190.3	4490.33	3605.25	2101.25	2100.27	2154.67
M340T210			0.175236	0.556756	0.000605535	340.11	210.346						1902.7	1287.24	1441.5	1458.6	1797.81	1696.37	1064.31	640.064	1084.37	1106.53	947.875	492.916	1338.82	1390.01	1338.62
M354T286_2			0.316097	2.39989	0.000605672	354.213	286.435						751.032	2246.31	1525.66	2381.08	1003.56	687.247	2824.33	3778.85	3092.39	4634.04	3167.73	3129.42	2234.95	2233.22	2201.37
M273T263			0.653199	0.292638	0.000606423	273.121	263.011						16897.2	9023.9	11101.7	5986.51	15371.7	14682.5	4127.79	2879.67	2560.26	4610.35	4288.53	2914.57	8250.85	8476.82	8252.56
M449T424			0.4336	0.251247	0.000609432	449.107	424.149						2527.15	6821.01	5695.92	6661.99	3929.57	7885.08	763.831	831.108	1427.36	2009.79	2128.19	1261.7	2286.16	2286.23	2100.17
M484T361			0.188828	0.410001	0.000613406	484.115	360.772						1291.13	1428.09	996.306	1296.69	1443.08	895.37	258.922	276.536	248.57	899.568	613.516	716.669	1026.78	986.834	986.616
M534T41_1			0.625682	0.19912	0.000618461	534.163	40.6165						8635.05	8355.57	5253.65	16269.6	13386.7	10138.1	1511.57	1133.78	787.059	3735.55	1555.01	3630.14	9375.49	8413.9	8403.02
M956T189			4.03408	2.65259	0.0006213	955.577	189.047						272589	84543.6	361506	6616.8	228158	200142	536025	587268	352010	445324	587164	552123	382620	384193	384358
M738T269			0.181925	2.12606	0.000623666	738.276	268.654						688.232	600.045	869.416	386.959	365.934	784.281	1249.13	1801.83	1018.07	1170.91	1170.32	1445.26	1043.96	977.206	1041.28
M443T173			0.771996	3.30507	0.00062408	443.322	173.5						1347.48	6336.54	14456.4	5320.17	1379.29	812.336	12332.5	18434.3	16890.8	18613	16401	15331.2	10875.8	11222.2	11221.4
M1067T179			0.757455	3.34963	0.000627359	1066.69	178.911						5392.25	2456.81	11003	60.4714	5880.73	3690.25	15879.2	18542.5	9634.3	13778	21882.9	15692.4	11589.9	11595.8	11961.3
M240T173			0.470306	0.433462	0.000629188	240.071	172.732						9486.89	8631.43	5730.58	10278.3	4892.02	9082.72	3480.65	4312.71	3895.05	3435.5	2396.58	3329.88	12144.7	11019.1	11021.8
M440T151			0.304511	2.96031	0.000633297	440.346	150.758						954.516	1198.15	1296.21	945.865	1091.12	603.058	1748.47	4367.15	2328.47	3463.77	2528.44	3588.78	2008.68	2129.56	2002.31
M1059T300_1			0.433693	1.86632	0.00063353	1058.67	300.03						5354.22	3387.56	6120.81	1392.85	4214.21	5992.52	7837.84	8730.09	8651.39	8669.1	7211.91	8286.63	5876.53	5879.27	5858.91
M537T103			0.607796	2.76414	0.000635832	537.381	103.078						1991.55	4086.04	10497.4	2098.42	3198.26	1895.12	9891.05	11007.8	10521.4	9742.35	12570.6	11961.5	7457.66	7459.71	7272.68
M86T123			0.548035	0.41752	0.000636138	86.0228	123.424						11772.2	8533.28	6430.99	9015.63	12539.6	12899.7	3265.27	3591.6	3118.71	3402.56	6626.99	5543.51	7081.51	5955.46	7110.71
M811T418_2			0.812559	6.66631	0.000637432	811.43	417.969						641.031	2280.54	7600.56	1788.99	968.744	840.832	10674.1	26909.2	12824.2	18211.6	14457.9	11055.9	10080.8	9787.87	9788.93
M1198T168			0.369473	0.495908	0.00063928	1198.08	168.492						6819.57	7137.41	5545.91	5666.15	4399.24	5313.49	2190.15	2466.17	4372.65	2873.35	1523.83	3872.01	4410.66	4483.11	4494.06
M640T544			0.567663	3.28665	0.000641238	640.354	543.623						2252.97	1719.26	7505.25	1773.14	1331.79	2503.51	9946.51	7292.68	12482.2	8325.05	11387.1	6721.81	5858.92	5851.26	6212.84
M503T419			0.185532	2.21129	0.000642831	503.138	419.125						454.596	620.472	611.281	428.978	537.165	708.927	1428.22	1662.18	1392.35	814.731	1219.52	916.059	875.649	811.036	812.4
M838T304_1			0.165614	1.80322	0.000644551	837.668	304.103						812.444	420.148	976.604	806.273	427.779	747.834	1444.98	1489.68	1164.66	1070.33	1217.16	1170.66	669.277	613.892	603.003
M1179T176			0.554884	2.23183	0.000645319	1178.84	176.296						5876.09	4260.84	7129.11	1144.02	5940.21	5119.76	9213.37	11393.7	9385.04	10993.4	15112.1	9674.31	6954.78	7263.9	7275.78
M945T300_1			0.273022	1.96844	0.000645861	944.716	300.072						2199.48	920.868	2335.17	669.255	2175.85	1276.39	3405.22	2872.76	3475.04	3069.45	2839.77	3189.57	2879.96	2836.64	2880.67
M216T382			0.767173	3.46232	0.000647993	216.062	382.366						6428.43	4908.83	5658.09	3622.03	5221.5	4925.84	12081.9	27640.9	12954.5	23186	16496.9	14157.1	10896.2	10993.4	10896.4
M1177T281			0.164115	3.23828	0.000650068	1177.18	280.702						133.119	561.346	485.507	48.3083	194.212	21.7935	881.907	1011.52	692.297	743.715	744.433	603.129	548.93	516.502	516.349
M1157T300			0.343885	1.81505	0.000655412	1156.65	299.78						3798.81	2215.14	3971.55	1116.89	2827.44	3842.91	4921.13	5714.53	5155.72	5643.8	4929.62	5893.62	3921.87	3922.04	3877.82
M422T449			0.292094	2.21588	0.000657827	422.207	448.786						1220.23	1315.7	2281.13	1129.83	1130.92	1095.51	3093.67	4347	2506.8	2858.7	2884.73	2420.19	2443.4	2440.95	2368.94
M497T68			1.76836	8.01852	0.000659643	497.202	68.342						2781.86	21169.6	15598.1	1176.18	6581.78	7589.26	49107.9	107424	118409	53038.3	64712.8	47498.5	31963.8	28914.4	31971.5
M493T98			0.652457	0.156092	0.000663842	493.167	98.272						9895.09	8847.85	3844.52	16416.2	13606.9	9790.17	2000.66	698.453	825.817	1956.08	866.173	3393.06	8621.5	8627.36	7688.55
M882T30			0.771061	3.7055	0.000664599	881.554	29.802						1748.66	9269.24	9967.52	1237.06	1926.86	1950.99	17838.3	19685.7	21254.3	11267.4	15704.1	10965.1	9332.15	9335.22	9044.87
M602T30			0.725486	0.643353	0.000666851	602.477	30.144						32688.7	28082.9	25834.6	33684	32980.4	38091	25037.4	19895.1	23957.4	16393.3	21676.5	16153.4	26321.6	26362.8	25544.9
M668T391			0.271029	4.70344	0.000671653	668.38	391.235						159.848	573.429	857.547	523.24	228.244	72.9848	1457.55	2135.43	974.168	2922.46	2274.54	1596.03	1151.84	1152.1	1108.1
M727T136			1.92056	2.9689	0.000677961	726.542	136.091						46856.7	19941.3	45327.7	13991.1	52111	53556	98098.3	156761	64334.2	111945	150349	106655	76971.1	70166.2	76964.9
M520T423			0.620049	1.86354	0.000678333	520.083	422.913						10735.6	8625.64	11861.4	2748.08	8735.89	11123.9	17732.5	17991.6	16578.9	12665.4	18324.9	17021.9	12992.1	13165	13165.6
M275T204			0.320171	1.64135	0.000679039	275.066	204.418						3366.31	2253.29	3840.14	4272.3	3184.13	2985.75	5199.88	5482.91	4074.17	6339.8	5354.3	6214.96	4597.47	4784.7	4598.19
M429T152			2.61691	3.03951	0.000681471	429.271	152.047						26207.2	80684.6	175648	39474.1	39606.7	34078.7	136715	230793	201393	225275	178797	229760	152968	152657	156249
M655T471_2			0.405236	5.36339	0.000683712	655.019	470.565						439.588	478.405	2479.44	240.884	544.707	396.641	4110.03	4313.84	1776.24	3258.65	5189.8	5914	2530.88	2530.78	2498.29
M1115T235			1.24128	6.38552	0.000684152	1114.55	235.459						5736.98	1437.38	18309.3	159.689	4784.74	4743.54	40917.6	38365	16140.6	27224.6	59068.2	42873	19227	19225.2	19559.5
M445T169			0.424442	0.395204	0.000686535	445.054	168.554						6771.44	7348.33	3985.8	6383.95	5139.76	7206.67	3296.18	1345.69	3921.71	2361.64	386.982	3245.5	4068.79	4124.48	4060.37
M1016T404			0.383314	2.94627	0.000692153	1015.55	403.63						343.047	3670.38	2719.22	1638.12	270.79	347.018	4734.11	4746.69	4357.77	4295.35	4485.68	3863.15	3053.07	3053.77	2713.95
M647T34_2			0.792003	0.272382	0.000694432	647.429	33.867						25396.6	19466.3	12955.7	20171.2	12774.2	12181.9	822.753	4020.92	813.539	7169.44	6357.89	8856.07	9695.18	10305.6	10324.6
M792T262			0.348527	3.17018	0.000702536	792.369	262.354						1400.12	781.559	2456.69	297.387	1302.85	483.835	3930.63	4541.76	1934.47	4334.21	3438.48	3131.82	2096.16	2163.25	2096.13
M332T355			0.322508	2.06116	0.000709075	332.237	355.411						2262.11	1983.07	2169.6	972.701	2810.38	1842.1	3248.47	5175.01	3893.61	4152.25	5199.98	3147.01	2983.48	2914.37	2982.01
M667T300			0.988659	1.70713	0.000715109	666.76	300.255						33811.8	21220.3	36886.4	12210.8	26895.5	36929.9	47632.5	48885.3	49565.9	48443.1	43977.2	48216	36192.4	36381.8	36088.9
M566T33_2			0.931694	0.491726	0.000715148	566.408	32.5465						42994	32718.8	25344.9	34398.7	42006.1	29500.2	10526.4	15862.7	11118.9	17903.6	24500.6	21856.8	30388.3	30854.2	30392.1
M941T488_2			0.321812	0.51688	0.000722312	941.495	488.025						4835.49	3897.43	4958.04	4965.84	4845.25	3744.53	1920.28	2200.18	1434.57	1537.64	3915.65	3074.89	2535.98	2577.63	2612.18
M591T64			1.00921	0.217005	0.000723063	591.435	64.2945						28898.8	33903.3	33107.6	35073.7	17284	10847	2578.8	5237.54	6366.38	2788.77	5969.23	11587.9	21027.7	21004.1	21993.4
M434T189			0.734324	0.252787	0.000729112	434.201	189.29						22220.4	18873.4	7392.27	14919.3	11811	13101.6	3347.55	4206.7	2336.27	7068.4	4074.57	1292.11	8852.4	8913.44	8914
M345T432_1			0.419575	1.94263	0.000733092	345.07	432.452						4151.71	4021.82	6046.35	1896.99	3054.78	3881.7	7478.82	7981.06	9511.27	6051.24	6326.39	7435.27	5718.1	5672.99	5717.49
M565T288			0.148164	0.620812	0.000738374	565.185	287.726						1255.54	1197.42	1129.16	1265.87	1004.93	1108.89	748.023	587.388	378.673	857.558	842.218	908.113	627.808	704.014	624.967
M1126T402_6			0.472864	6.12961	0.000741469	1126.17	401.982						142.877	1390.68	2921.02	479.274	209.446	149.38	3696.84	9017.73	4727.21	3959.98	6564.92	4475.41	2764.54	2600.02	2767.62
M985T402_4			0.548665	5.96672	0.000743286	985.402	401.952						315.502	1956.88	3940.04	637.758	327.976	281.041	5389.63	12153.1	5438.63	5109.47	9259.38	7156.82	3930.48	3931.44	3857.28
M300T51			0.594488	0.787308	0.000745127	300.201	51.444						34445.1	42823.4	40347.9	41380.1	37107.7	35814.7	25734	33313.5	32004.8	30463.6	30511.7	30564	38305.4	40782.2	40785
M454T151			0.514692	3.10028	0.000748633	454.361	150.843						1439.6	2641.59	6508.86	1237.86	1437.65	1596.6	6801.64	10104.3	8145.69	7738.75	4939.32	8347.21	4353.74	4365.86	4433.38
M752T135			0.796385	2.23376	0.000750398	751.545	135.216						12591.7	13721.4	15831	5673.89	12532.7	9149.78	19070.9	22752.9	36723.9	29954.2	22954.6	23791	19470.8	19469.9	18977.7
M934T288			1.28068	6.91834	0.000752569	933.505	287.665						520.941	16415.4	14037.2	1958.18	511.523	471.201	33193.2	65140.1	36834.1	48712.7	27174.9	23576.4	22458.6	22461.7	21729.9
M279T294_2			0.502794	0.558411	0.000754377	279.11	294.1						13237.1	10761.9	11621.2	12185.1	15885.8	14684.3	6251.01	8264.49	11354.5	5090.34	6619.24	6186.1	10466.5	10221	10223.5
M333T54			0.675674	0.369218	0.000757747	333.132	54.448						15398.4	16952.4	8305.94	20349.8	12512.9	16799.3	7039.98	6389.8	5719	8900.32	1910.52	3387.65	9621.49	9621.75	9482.9
M600T33			2.90349	0.371634	0.000774197	600.414	33.235						195579	359679	176191	329893	340679	256410	62926.4	77535.4	56640.6	128252	130163	160812	186542	192089	186539
M702T148			1.52592	1.34364	0.000775057	701.558	147.553						144346	141953	154234	129026	129181	133317	167180	206985	203097	157340	208194	175190	160603	158104	158115
M878T487_1			0.162109	0.675353	0.00077605	877.966	487.194						1881.17	1449.13	1950.62	1648.06	1550.38	1539.65	1101.07	1022.07	832.65	1137.53	1340.57	1332.48	1358.88	1358.81	1431.85
M704T128			1.43231	1.40589	0.000776068	703.573	128.47						127189	100032	92707.5	95824	99465.8	124629	152680	177785	138079	144013	155619	131381	148806	148765	143685
M513T334			0.556875	3.95174	0.000778622	513.308	333.647						528.492	3232.03	4695.39	1573.72	1542.25	1028.17	8060.43	6554.72	5157.31	7600.9	13263.4	9155.27	5019.59	5050.67	4916.81
M812T418_1			0.573906	8.39769	0.000779202	811.931	417.959						263.345	818.796	3276.31	250.735	462.86	372.886	5384.36	13688.3	6332.95	8862.91	6349.62	5106.75	4887.46	4808.88	4808.77
M1126T402_5			0.484791	7.4265	0.000783966	1126.03	401.952						149.715	1260.6	2416.85	494.666	34.5026	179.962	4003.71	9973.3	4623.26	3778.85	6423.18	4886.48	2876.54	2944.23	2944.24
M981T333			0.680978	7.74364	0.000789877	980.589	332.69						260.471	2515.27	4932.11	424.202	237.101	256.052	5652.18	11779.4	8267.65	19223.4	12065.4	9802.34	6699.2	6697.72	6751.51
M917T475_1			0.347167	8.82015	0.000792036	916.655	474.827						83.1083	383.603	817.222	231.679	217.911	238.935	2664.6	5249.01	1515.01	2012.88	3296.01	2659.86	1507.92	1634.25	1505.47
M115T368_2			3.40798	0.154913	0.000792731	115.086	367.997						150941	407020	176906	406147	253429	252938	6280.85	2285.8	3595.62	66484	55861.9	120693	133043	123382	122334
M213T441			0.148203	0.566384	0.000794594	212.97	441.319						1251.64	997.281	769.996	1135.91	1145.96	844.012	461.295	518.958	444.534	601.916	667.82	785.787	1079.4	1078.92	1118.97
M219T329			0.57818	0.486103	0.000796093	219.133	329.034						10948.6	16312.7	14107.2	17938.9	12686.4	9681.66	8476.4	5152.28	5705.83	5573.27	5521.97	9272.9	13170.9	11698.6	13151.9
M309T465			0.244592	3.31011	0.000798237	308.693	464.815						272.47	414.281	1289.1	651.56	283.132	113.315	1450.68	2441.26	1387.02	1307.99	1877.15	1545.2	1184.77	1181.26	1265.2
M452T420			0.191569	1.98727	0.000800899	452.043	419.689						780.101	222.468	963.415	1034.25	923.476	716.998	1496.32	1914.2	1615.69	1117.03	1437	1642.08	1163.17	1163.08	1198.09
M619T301			0.323252	1.73871	0.000802347	618.769	300.609						3124.63	1664.21	3628.03	1587.35	2920.83	4194.08	4775.55	5331.79	5215.11	4763.3	4561.09	5118.27	3917.52	3987.32	3987.52
M1190T168			0.336297	0.487115	0.000804858	1190.09	168.471						5502.55	5710.71	4254.66	4646.84	3771.33	5010.11	2015.21	1962.11	3829.15	2628.68	736.468	2904.15	3535.89	3557.67	3557.58
M348T231			0.281637	2.15242	0.000808537	348.253	231.305						1165.39	762.576	2243.41	1776.5	1283.75	1021.56	3344.17	3051.94	1836.46	2739.92	3569.3	3222.58	2432.35	2387.79	2387.78
M439T153			0.49129	2.90902	0.000808862	439.334	152.719						1316.32	1764.73	6522.56	1377.43	1339.13	2463.02	5492.69	8480.73	6012.66	8627.83	6490.88	7899.74	4823.68	4762.56	4823.77
M846T124			0.659655	0.384487	0.000809477	846.303	123.934						12501.7	14975.5	16840.8	16260	20580.3	11032.7	2456.14	3569.72	2121.41	8557.54	9108.87	9632.59	12019.9	11870.7	12020.8
M307T319			0.372229	0.228531	0.000816412	307.056	318.601						3946.93	3851.96	1712.82	3993.66	2624.46	5921.33	787.823	1006.01	428.555	802.86	1432.33	581.803	2589	2591.51	2318.6
M372T299			0.287833	0.51343	0.000837402	372.045	299.145						3730.5	5049.8	3226.52	3067.51	2699.41	3437.45	2185.92	1825.26	1260.5	2073.92	2039.49	1505.37	2641.16	2900.21	2900.39
M424T362			0.39528	0.313384	0.000845376	424.111	362.137						5285.45	6184.34	3352.88	4888.17	5048.13	2490.53	898.424	630.69	510.927	2372.66	1554.95	2571.92	3279.24	3278.79	3246.5
M899T313			0.253282	2.88331	0.000850599	898.54	313.332						714.775	566.105	1028.2	367.415	851.984	696.606	1177.16	2693.08	1309.68	2282.59	2650.51	2069.16	1468.04	1467.72	1554.74
M336T168			0.36376	0.66914	0.000855371	336.053	167.852						10524.4	9365.28	7802.02	8474.94	7022.91	8974.41	5936.98	5774.13	6422.13	5903.21	4191.29	6677.23	7072.7	7042.2	7042.21
M588T426			0.155385	2.12387	0.000856246	587.968	426.339						374.36	607.892	619.324	100.341	545.138	414.783	1082.42	1138.89	1021.39	811.927	687.053	911.706	607.136	556.962	607.024
M541T284			0.380651	2.08222	0.000863837	541.303	284.253						3458.5	2589.65	4380.59	1436.4	1788.89	2535.71	5631.13	6407.75	3499.92	5786.81	6220.26	6164.8	4333.8	4333.83	4356.62
M373T407			0.413364	2.69549	0.000865984	373.219	407.37						1662.13	2418.83	3413.92	1810.12	1675.52	1216.06	6642.36	7676.89	4330.98	6376.44	4128.95	3720.09	5425.43	5426.61	5532.17
M1136T349_1			0.325221	3.20409	0.000869187	1135.58	348.524						255.316	1779.3	1521.86	1675.12	261.677	229.669	2624.53	3743.68	3563.39	3920.52	2405.59	2079.1	1988.67	1911.72	1917.21
M436T420_1			0.379809	5.97538	0.000870126	435.742	419.849						195.434	1321.66	965.506	1014.63	73.676	163.256	4667.74	5580.75	1612.91	4770.11	3187.31	2494.22	2421.24	2421.24	2415.29
M600T140			0.5092	0.51792	0.000872151	599.501	140.448						13547.4	11056.7	9986.06	10509.2	13026.4	13834	4250.92	4359.96	10867.6	5526.5	5026.95	7237.39	9986.63	9964.88	9566.63
M593T148			1.58732	0.192839	0.000873655	593.274	148.213						104888	30932.5	68707.4	101946	51734.9	58882.2	9653.13	10499.4	11565.2	13202	13536.6	21975	42465.8	43604.8	43632.4
M648T64			0.86723	0.156915	0.000873914	648.28	64.355						29484.2	23410.6	20772.9	18862.8	8555.14	10117.2	2256.47	1751.35	2516.55	3198.83	1406.93	6319.31	11926.8	11896.8	9621.58
M707T168			0.344965	0.522433	0.00087882	707.075	167.882						5413.98	7002.76	4501.95	5837.04	4517.76	4103.85	2495.06	2475.43	3553.45	2740.67	1596.86	3531.1	4137.17	4173.67	4177.09
M1065T180			0.859933	3.01271	0.000880808	1064.68	180.1						7995.78	3910	17613.2	382.348	6708.63	5857.85	21413.2	20579	16658.6	19991	30334.1	18967.2	16548.8	18065.2	17704
M369T154			1.87396	4.18741	0.000883336	369.274	154.153						5198.16	23092.5	78816.1	10297.6	6449.22	8243.09	59962.1	114601	86703.5	98208.8	73926.1	119742	56980.9	56989.9	58042.2
M543T466			0.161106	1.91366	0.000885297	543.047	466.486						526.152	649.439	748.48	549.839	502.309	485.638	929.177	1399.51	841.507	879.641	1402.5	1172.5	918.14	918.418	949.029
M491T333_2			0.493575	4.92916	0.000888988	491.299	332.703						203.399	3419.86	2522.26	1096.56	358.114	243.263	3430	7297.14	4898.21	10296.9	6585.72	6153.7	3973.26	4008.57	3973.38
M961T300_1			0.578014	1.79161	0.000895142	960.692	300.03						11419.5	6258.87	11447.5	3513.91	8145.9	11648.5	15345.5	16652.7	16576.3	15168.9	13289.7	16908.5	11487.7	11402.9	11488.1
M267T292			0.469444	0.491854	0.000899627	267.11	292.23						9758.33	9708.88	6636.85	8220.19	6825.57	12068.6	3230.2	3096.12	4063.14	5241.42	4437.39	6107.4	6602.42	6603.85	6510.31
M278T362			0.3817	0.199406	0.000899869	278.182	362.404						1418.41	5110.57	4612.63	5557.26	2919.85	3493.81	349.856	229.872	459.42	1394.6	999.222	1175.81	2891.16	2859.93	2895.63
M696T421			0.218313	2.17288	0.000900935	696.403	421.06						622.663	1067.66	1132.41	1004.03	707.719	523.206	1532.41	2408.65	1414.84	2275.37	1375.63	1982.85	1090.44	1063.93	1179.34
M529T286_2			0.208402	5.20147	0.000904144	529.37	286.28						46.385	330.034	669.503	38.6234	89.4157	81.536	936.398	1428.99	769.636	1686.62	1012.9	695.895	750.326	778.367	749.217
M229T405			0.227961	1.662	0.000909975	229.01	405.155						1355.1	1617.54	2157.06	1137.63	1502.67	1042.19	2349.19	2370.59	1884.63	2703.46	2755.64	2582.37	1724.81	1735.56	1670.22
M1022T488_1			0.181188	2.98776	0.000911436	1021.92	488.155						425.681	249.569	261.962	207.591	267.927	674.41	1436.12	1444.84	845	882.339	919.227	708.358	730.227	764.216	730.187
M770T477_1			0.215555	3.49215	0.000915052	769.835	477.283						295.456	545.017	726.11	160.787	119.089	417.008	1961.16	1631.74	1397.76	816.44	1194	903.271	685.058	664.511	683.903
M283T52			0.768981	0.773247	0.000919203	283.175	51.987						59623.1	71067.6	68865.1	67547	71893.5	64121.7	39896.4	59727.2	53946.6	54192.7	52861.6	51085	66037.8	67654.8	67649.2
M917T475_3			0.462096	4.35651	0.000921539	916.992	475.276						545.756	1817.58	2026.79	2447.2	574.114	578.121	5483.08	9629.13	3462.1	5069.91	6856.31	4306.12	3484.48	3209.56	3488.05
M1037T401			0.260197	2.9162	0.000921664	1036.93	401.12						1447.93	608.43	948.592	66.9915	1612.38	21.1105	2040.11	2251.61	2380.28	1792.13	2231.58	3026.28	1206.18	1206.01	1185.33
M417T300			0.239962	1.47188	0.000921814	416.894	299.663						3302.31	2067.9	2283.62	1805.12	3120.46	2994.58	3592.92	3737.01	4052	3994.99	3708.51	3837.69	3770.85	3769.59	3823.38
M547T232			0.537411	0.283574	0.000923807	547.144	231.809						9221.44	12139.4	6446.12	10757.7	11153.4	4066.59	2391.52	3042.23	3185.99	1441.96	4481.11	709.138	6669.76	5901.51	6667.71
M531T144			0.287966	1.92554	0.000927373	531.268	144.293						2158.18	1454.75	2453.24	1864.39	1616.59	1611.83	3523.1	3373.7	2330.43	4882.31	3892.19	3485.32	2524.64	2566.21	2476.46
M1055T397			0.287996	2.92539	0.00092796	1054.69	396.73						341.327	1745.56	1897.74	594.984	330.604	376.333	2185.91	2438.65	2599.04	1962.74	3387.48	2891.37	1665.38	1700.92	1718.5
M164T330			0.233669	0.580919	0.000937913	164.091	330.403						3763.2	2650.54	2346.02	2441.1	2670.42	2717.91	1474.43	1237.45	1934.68	1473.17	2114.54	1402.71	2021.2	2134.32	2134.15
M1140T233			0.397118	3.15526	0.000938364	1139.55	233.282						1760.71	1119.78	3337.79	267.882	1570.48	642.914	5056.67	3965.45	2896.71	3928.37	6507.41	5094.77	3243.04	3223.42	3265.29
M736T348			0.499663	4.08433	0.000940744	736.423	347.604						656.799	2522.35	3599.75	1512.94	852.655	911.363	3733.95	6973.78	4402.46	9258.5	6822.08	9880.62	3807.57	3778.76	3846.62
M1141T348_2			0.447814	7.07805	0.000943344	1140.82	348.228						198.4	1168.51	1803.91	505.182	158.188	90.5688	4035.51	7218.2	6187.75	5355.7	3054.69	1927.76	2405.52	2408.49	2268.83
M290T387			0.200204	0.524714	0.000945609	290.16	386.651						1365.71	1799.8	2358.39	2139.54	2429.06	2324.98	1288.73	840.356	591.998	1241.85	1456.19	1096.51	1602.6	1658.5	1658.48
M243T257			0.207486	1.47587	0.000948479	243.183	256.657						1547.55	1653.04	2262.76	1818.47	2212.16	1641.54	2406.06	2406.75	2652.62	2696.34	2945.03	3327.71	2739.79	2653.08	2655.29
M344T377			0.729813	3.12641	0.000950571	344.181	377.076						2645.75	7386.78	11461.4	4338.1	2476.74	2455.55	10287.2	17601.9	13597	23176.5	13720.1	17798.9	10317.3	10310.4	9608.95
M465T153			1.65478	2.66357	0.000960473	465.342	152.822						10400.1	43840.4	78959.7	26636.8	12750.1	15798.9	92840.2	84466.2	72900.5	93221.7	74599.3	83751.3	57012.8	57014.9	56076.2
M462T193			0.557787	1.93165	0.000964102	462.261	193.462						4159.06	5501.89	10659.1	3837.91	7080.57	7779.08	10456.7	13917.3	10490.7	11542.4	14494	14467.5	10916.4	10123.1	10916.9
M742T488			0.269837	0.368708	0.000965553	742.26	488.314						2101.25	2379.94	1571.06	3782.71	2847.64	1989.2	669.666	787.168	602.581	1187.05	1171.38	991.772	1671.32	1727.12	1726.75
M522T188			0.340386	0.393841	0.000976178	522.257	188.396						3452.51	5078.22	3042	3468.65	3249.79	6240.18	1812.99	1138.97	2027.13	1385.84	1723.2	1573.33	2507.71	2186.95	2489.84
M1014T183			3.12941	3.64291	0.000981776	1013.66	183.301						90277.1	34510.2	149678	3608.12	103115	69598.5	268861	303826	127082	221258	394399	326751	211907	209744	209754
M394T488			0.241009	1.81881	0.000982119	394.086	488.186						1583.12	1522.68	2002.49	416.998	1344.76	1639.08	2312.04	3045.52	2361.96	2297.28	2819.04	2640.66	1896.1	1956.81	1899.83
M1121T233			0.352676	3.32849	0.000984524	1120.59	233.173						1440.82	260.863	2476.7	52.9316	985.51	1201.44	3895.54	3526.17	1887.47	3099.36	4769.91	4184.68	2448.08	2449.19	2373.91
M886T184			0.399886	0.330939	0.000985803	885.548	184.096						4803.6	6291.59	2352.51	6077.94	5801.68	5019.69	1035.19	851.29	3207.37	2394.37	2141	413.806	2246.88	2098.27	2006.72
M415T158			0.519576	5.39749	0.000992924	415.327	157.988						926.943	1299.03	3124.64	550.871	817.523	539.174	8906.7	8735.44	9024.75	5241.75	3244.67	4022.61	3690.26	3457.93	3672.53
M1192T400_5			0.271612	2.74726	0.000993541	1192.49	400.206						1743.05	636.319	1238.19	207.157	22.3774	1890.96	2301.57	2364.35	3446.9	2561.58	2520.15	2569.39	1251.57	1245.58	1255.36
M485T116			2.17715	5.38303	0.00100854	485.202	116.115						2069.01	65244.6	54162.3	10842	1819.33	889.799	92000.9	154116	191379	79391.9	120699	89267.8	65147.8	64335.8	65144.4
M600T282			0.19921	1.89128	0.00101437	600.208	282.222						1703.06	694.056	1005.31	1018.06	1043.67	573.142	1636.34	1697.45	1801.27	1847.66	2052.75	2382.75	1778.87	1657.86	1771.07
M489T422_1			0.58466	4.16295	0.001017	488.728	421.609						769.173	4020.72	3675.2	3408.92	773.256	880.92	9339.91	13969.3	4907.98	11603.2	10650.8	5845.99	6206.07	6244.46	6187.76
M387T319			0.474092	0.226963	0.00102274	387.187	318.819						6762.64	4046.48	4884.6	3298.79	9187	8899.34	780.189	2149.22	1946.04	1172.26	1020.03	1347.79	3942.2	3850.99	3850.83
M1177T172			0.308768	2.82336	0.00102533	1176.83	172.017						899.663	355.714	1405.49	1671.06	1445.89	664.181	1977.22	3488.42	2523.76	3812.84	4178.86	2206.99	1698.3	1812.51	1697.76
M727T299			0.709539	1.70316	0.00102794	726.8	298.924						18338.2	11814.5	19338.9	6284.5	13143.8	20147	25205.9	26048.1	25480.9	25549.1	22544.4	26867.3	19752.1	19773.7	19706.2
M370T419			0.518843	1.88075	0.00103656	370.052	419.229						7544.32	4158.61	7339.55	2042.67	7327.28	8107.07	12729.7	13163	12225.1	9015.13	10779.7	10771.5	8198.04	8082.94	8198.01
M1021T300			0.366426	1.71348	0.00104581	1020.73	299.554						4778.27	3230.01	4985.75	1559.81	3453.78	5335.54	7372.97	6739.66	6426.75	6571.98	6041.88	6844.84	4930.29	4838.22	4930.61
M702T159			0.377809	0.452981	0.00105665	702.469	158.559						5176	5511.51	8402.08	5187.38	6630.87	4089.6	2388.73	1631.49	2110.58	3889.49	2445.51	3387.38	5162.9	4856.71	5167.92
M579T288			0.652599	0.262023	0.00106579	579.17	287.965						7229.71	13959.2	11678.3	17197.9	23466.1	11565.4	2841.5	2982.65	3650.64	4425.59	4231.33	4165.6	9013.62	9114.78	9013.59
M1135T349_1			0.31014	3.80123	0.0010669	1135.08	348.623						20.8314	766.077	855.702	758.225	1743.32	61.9852	2445.64	3557.56	3318.06	3209.66	2110.45	1347.14	1357.8	1348.43	1348.44
M269T382			0.254639	0.531483	0.00107309	269.086	381.712						3020.62	3058.97	2294.46	3055.09	3173.31	2729.07	1295.37	1008.64	785.842	2599.22	1746.7	1775.63	3052.55	3057.35	2909.25
M458T380_2			0.478833	3.37598	0.00107552	458.261	380.291						1018.94	2275.64	5134.04	1037.62	1222.18	907.905	6446.62	7253.15	9862.33	4872.12	5290.21	5424.52	4003.93	3997.79	4163.37
M578T146			1.25536	3.58605	0.00107686	578.211	145.573						2693.43	32472	31372.5	2792.42	2083.16	2884.74	35776.6	55518.1	52629.2	37084.1	46045.9	39383.1	30451.6	30403.4	31739.1
M157T441			0.34759	0.418249	0.00107822	157.012	441.013						5493.83	3843.7	2347.6	4449.63	4445.77	4251.48	1148.35	1303.68	815.08	2895.74	1884.81	2338.31	3184.31	3184.42	3101.68
M540T303			0.202531	2.20279	0.00107953	539.763	302.863						1028.29	599.574	1037.43	161.275	430.083	1088.1	1323.24	2018.07	1690.57	1698.16	1297.94	1542.59	1008.46	1011.55	1157.99
M458T191			2.30225	2.24302	0.00108375	458.266	191.058						102929	40182.3	152057	7953.87	94300.5	95657.4	204660	205026	150679	169988	195073	180564	139011	139013	140233
M655T471_1			0.527451	5.74349	0.00108429	654.684	470.671						609.137	716.086	4152.99	321.324	694.382	804.505	6929.23	7800.63	2607.28	5175.33	9377.27	10028.7	4033.17	4119.66	4034.84
M88T325			0.294972	0.561994	0.00109403	88.075	324.964						3695.87	4904.14	3252.14	5726.68	4793.36	3426.58	2760.06	2168.41	2119.72	2579.81	2545.53	2325.21	2959.14	2949.66	2704.58
M428T204			0.270578	0.440118	0.00109493	428.178	204.43						2417.8	3492.24	3551.96	1896.75	3792.8	2349	825.876	920.407	1100.43	1554.54	1462.37	1838.69	2589.08	2614.93	2569.15
M501T25			0.137378	0.522875	0.00109977	501.371	25.3145						808.14	670.643	734.219	892.672	802.377	1239.17	469.841	512.623	493.795	262.78	488.835	463.482	898.605	796.96	792.5
M339T169			0.330521	0.414255	0.00110183	339.048	168.969						4231.91	4729	2209.53	3762.89	3731.58	4743.08	1011.51	3134.37	1879.79	1380.44	1105.33	1185.44	2786.78	2685.81	2683.81
M826T93			0.494244	2.36857	0.0011132	826.288	93.377						2868	4337.04	7301.06	2514.97	1777.36	2019.49	6763.72	10632.9	8224.35	6914.83	9328.88	7443.94	5743.94	6720.76	6688.52
M283T72			0.982188	0.843228	0.00111377	283.175	71.872						153672	179986	173400	161470	177671	163219	127112	152412	151603	144112	141631	134299	163186	167090	163189
M611T168			0.383014	0.482152	0.00111821	611.053	168.451						6757.04	7240.15	4996.26	6027.11	4362.23	6927.53	2019.82	2372.43	4492.92	2916.09	1400.5	4305.32	4852.97	4916.55	4916.38
M561T441			0.196798	0.356328	0.00112072	561.003	440.757						1402.77	1236.49	492.505	1490.49	1451.76	1155.6	324.95	234.953	279.356	758.176	430.172	548.51	942.184	866.137	958.081
M542T314			0.392899	3.15234	0.0011317	542.292	313.589						475.787	2733.47	3345.78	1384.04	464.949	450.725	3187.81	3699.82	4723.16	6531.49	5040.06	4730.85	3935.89	3935.88	3961.89
M1002T355_1			0.278528	3.21872	0.00113674	1001.53	354.769						393.063	828.494	1088.17	925.962	511.361	618.177	2095.33	2930.03	1048.7	2467.67	3485.36	2023.37	1539.56	1639.69	1541.87
M409T105			0.893973	4.26356	0.00114085	409.136	105.279						935.754	14709.5	8681.64	3641.1	2041	989.049	33105.4	21685.3	28411.1	14290.6	18465	16204.5	21833.8	18960.4	19075.2
M771T429_3			0.18857	2.53035	0.00114374	771.153	429.148						291.577	720.154	695.644	610.755	201.05	435.651	1570	1443.29	980.035	736.728	1596.45	1150.24	875.726	940.084	939.083
M689T31_2			0.398196	0.498444	0.00114385	689.499	31.2355						7869.97	5399.04	5369.57	9730.79	5843.06	6959.33	4192.88	3146.4	3734.3	2460.77	2722.97	4264.5	5370.23	5934.98	5250.9
M316T57			2.8818	2.60246	0.00114432	316.321	57.134						109804	133110	112947	123893	128823	42140.8	218557	329860	321837	286954	392161	144098	272621	276247	272641
M464T419			0.435894	2.76059	0.00115016	464.252	419.332						1475.9	472.06	2642.47	5690.16	1550.57	1332.23	5280.8	7339.98	7252	5194.24	6026.06	5245.64	4434.73	4433.6	4392.28
M192T63			2.75925	4.39207	0.00115732	192.065	63.112						8743.9	113687	128066	13601	9266.64	7587.03	142767	224708	297330	171048	257905	140204	121967	129093	129260
M790T422			0.091099	1.78682	0.00116322	790.064	422.229						249.832	133.777	168.432	115.659	321.085	310.934	378.144	391.819	395.991	423.546	383.759	349.106	407.134	430.622	411.678
M490T422			0.256574	3.82564	0.00117046	489.73	421.577						140.701	817.108	668.112	863.057	188.517	181.665	1864.33	2714.44	1308.16	2180.18	1996.84	874.147	1334.81	1396.33	1335.08
M688T488			0.106498	1.66021	0.00117718	688.054	487.571						300.901	313.495	477.841	322.049	319.178	305.124	633.09	630.128	429.477	441.162	657.901	592.726	495.966	484.006	480.067
M845T124			0.552644	0.461401	0.00117908	845.274	124.351						12838.5	11570.1	13045	9830.66	13093.6	8450.86	2414.79	3595.41	2404.95	7430.21	7955.05	7957.22	9242.58	9168.36	9180.93
M1063T179			0.868947	3.46963	0.00118146	1062.66	179.466						4071.5	3853.97	17564.6	357.221	7077.2	3143.51	24101.7	15520.5	14071.2	19248.1	27474.7	24726.4	15014.4	15598	14997.8
M611T361			0.378387	0.413471	0.0012003	611.206	361.173						3756.01	5773.37	6236.99	5142.2	6989.41	4359.15	1895.33	1481.7	682.194	1852	3952.74	3473.42	4022.34	4117.14	4023.78
M281T403			0.256814	0.522636	0.00120755	281.083	402.582						2822.58	2695.91	3701.16	1940.08	2923.26	2947.4	868.935	1611.99	1010.05	1590.48	1610.25	2208.99	2347.48	2348.96	2184.14
M616T404			0.208732	2.40446	0.00121202	615.829	403.81						447.998	865.265	950.731	873.646	366.92	462.173	1337.2	897.385	1670.62	1690.28	2201.34	1741.02	1079.84	1115.7	1079.63
M904T187			0.545587	2.69284	0.00122259	904.481	187.454						3946.57	3189.53	8679.87	863.154	2296.11	1395.24	8438.47	12016.1	8377.91	8652.84	8640.69	8728.43	7484.32	6482.57	7452.53
M1048T230			0.295985	2.94013	0.00122463	1047.59	229.935						716.127	957.686	2017.99	72.4904	890.537	645.519	2532.63	2810.52	1399.07	2459.83	3503.27	2878.42	2000.24	2004.73	2005.89
M441T146_1			0.243309	0.238363	0.00122694	440.806	145.681						1384.97	2098.84	888.014	1095.43	1946.45	2495.16	431.179	313.9	909.21	73.322	462.617	171.677	1224.55	1263.18	1325.4
M768T135			0.434338	1.95741	0.00122816	767.576	134.88						4057.67	3007.31	5345.94	3220.76	6454.71	2581.71	7160.01	10829	7437.76	6335.99	8532.51	7990.27	5634.89	5491.35	5872.07
M152T455			0.241891	1.51015	0.00123044	152.056	455.314						1775.93	2119.04	3096.87	2624.38	1775.49	1931.65	3077.56	3312.31	2937.26	3759.43	3355.37	3678.35	2842.41	2724.45	2718.73
M651T58			0.663255	0.25484	0.00123597	651.283	58.1325						18078.3	17093.7	10540.7	14771.6	10746.2	4699.76	3029.05	2977.13	3959.9	3797.36	742.717	4843.91	8155.92	7969.21	7144.4
M1100T475_4			0.382028	5.66925	0.00123632	1100.19	474.964						488.145	408.195	1334.28	365.625	758.357	637.865	3748.96	6762.89	2012.27	2915.05	4354.63	2840.49	2214.47	2298.1	2299.1
M607T455_2			0.246745	0.4364	0.00125454	607.207	455.343						2216.82	2562.76	1479.79	2186.83	3252.93	1980.33	648.954	725.08	570.337	1361.7	1264.64	1399	1666.23	1666.46	1603.39
M1047T231			0.381981	3.32374	0.00125911	1046.57	230.594						1071.58	757.679	3075.77	199.626	1438.96	913.619	4242.86	4468.42	1925.25	3681.21	5565.73	4902.47	2775.45	3018.37	3014.76
M943T170			0.370126	2.43578	0.00126316	943.469	170.176						2027.2	1466.74	4253.64	903.47	1839.33	498.206	4428.47	5476.78	4403.13	3960.76	4743	3753.65	5129.59	5172.48	5720.31
M941T300_2			0.27372	2.08952	0.00126384	941.224	300.03						1850.64	656.003	2212.47	221.54	1362.11	1973.42	2671.3	2801	2795.84	2639.13	3208.24	3177.74	2071.52	1994.12	2071.91
M160T204			0.336305	2.309	0.00126617	160.107	203.765						2533.8	870.373	3198.16	694.633	1513.73	1665.53	3341.06	3539.85	3136.45	4468.38	4496.7	5207.2	2940.47	2940.52	2927.51
M916T477			0.271848	2.39255	0.00127022	916.428	476.545						671.361	1660.22	1999.73	680.651	647.868	697.514	3154.98	3069.89	2449.1	2608.27	1689.95	2238.1	1770.21	1713.5	1770.14
M367T35_2			1.83138	2.15093	0.00127659	367.283	35.165						59205	59584.3	97102.1	38352.8	50395.3	49500.6	136907	146108	63666.3	146111	140146	128795	78554.8	78555.1	78040.8
M423T403			0.222655	0.399437	0.0012788	423.032	403.1						1499.46	2340.99	1575.69	1969.74	1417.8	1447.53	91.8681	521.181	429.247	1299.09	1007.72	745.613	1300.6	1305.31	1300.59
M567T267			0.398395	3.52544	0.00128789	567.349	266.757						724.947	1101.2	1675.64	2486.93	1328.08	973.73	2585.57	5328.15	4604.88	7203.95	3062.68	6442.5	1536.05	1293.19	1885.22
M244T123			0.47273	1.24455	0.0012879	244.263	122.658						18770.9	17669.4	19068.2	19432.8	18841.6	17045	21312.1	25571.8	21024.3	21878.7	26328.1	21815.2	33511.6	33357.3	32282.1
M376T436			0.341952	2.28243	0.00128799	376.218	436.272						1402.24	2196.48	1890.91	2823.4	1286.27	1805.04	4291.19	6795.44	3675.94	3881.01	3785.33	3600.74	3425.1	3420.77	3581.18
M422T143			1.35701	2.00611	0.00130533	422.325	142.963						28162.9	34594.9	58505.6	30020.5	33704.5	34004.2	64062.3	98215.4	74697.1	47578.3	82840.1	71930	58616.7	59464.9	58618.3
M1046T181			0.610901	2.07057	0.00130945	1045.71	180.741						6283.47	2815.39	11783.3	9267.79	6233.97	6566.4	17604.5	13593.2	10760.4	13126.3	18707.5	15139.7	10159.1	10151.6	9809.85
M710T169			0.336393	0.420011	0.00131288	710.071	168.818						4818.34	4703	2583.32	4180.3	3487.17	4907.31	1516.92	1323.86	3018.28	2044.31	207.178	2255.09	2690.32	2701.74	2836.66
M709T299			0.279396	1.53685	0.00131535	708.827	299.109						3774.88	2420.21	3521.72	1533.38	3441.87	3355.78	4160.46	4571.61	4684.84	4692.7	4664.96	4962.16	4171.18	3960.12	4169.01
M439T307			0.171954	0.715117	0.00131961	438.787	307.339						2450.35	2559.96	2349.17	2788.8	2080.44	1909	1774.83	2009.17	1503.35	1711.47	1586.9	1524.39	2108.79	1853.88	2109.01
M1181T487_4			0.166838	2.00859	0.00132015	1181.32	487.228						1054.65	354.742	620.932	287.188	436.54	841.64	1147.39	1396.96	1123.99	1366.38	1184.65	1002.92	1003.32	1041.81	1045.53
M366T381			0.415579	0.368384	0.00132153	366.063	380.511						4584.12	7828.23	4246.76	7089.52	3595.92	4958.41	1077.77	1312.05	1666.93	2319.11	2063.9	3460.13	3986.65	4002.98	3955.01
M497T234_1			0.426774	2.90185	0.00132288	497.234	234.313						1326.11	2092.71	4338.44	1613.84	608.429	1655.73	5352.37	6328.56	2487.34	6646.81	6414.4	6534.26	4209.99	4113.18	4116.57
M1055T396_2			0.315911	2.61153	0.00132489	1054.83	396.366						477.93	2740.84	2458.67	897.086	490.929	598.866	3055.7	3183.79	3465.83	2698.19	4110.06	3502.02	2507.96	2570.5	2528.16
M279T286			0.308582	0.586489	0.0013249	279.038	286.442						4667.46	5642.61	5318.47	6154.71	3899.22	4147.73	3670.21	3838.09	3012.16	2283.68	2059.07	2631.86	5465.34	6066.16	6064.62
M299T308			0.288877	0.433373	0.00132524	298.875	307.865						3931.54	3497.28	2021.48	3453.89	2252.12	2526.38	989.187	974.963	656.009	1969.51	1322	1751.53	2470.46	2415.99	2416.33
M343T161_1			2.54668	6.92858	0.00133677	343.258	160.602						3694.66	23052.7	87055.1	7602.62	3591.11	6803.56	130860	278433	155338	125836	95320.1	127398	84107.5	85321.4	84048.9
M712T346			0.227369	1.98596	0.00133987	712.381	345.973						1085.52	1456.47	1473.12	700.063	552.603	1449.46	1943.06	2321.05	1674.51	2446.72	2965.14	1989.67	1488.88	1537.48	1535.61
M728T349			0.400359	2.8858	0.00134726	728.44	348.558						561.575	1052.97	3793.34	1383.09	1900.7	1402.92	3567.59	5005	3728.27	4059.34	7109.73	5661	3464.07	3347.38	3464.41
M1009T300			0.194176	2.1238	0.00135806	1009.18	300.352						1209.95	367.322	900.87	41.6337	924.064	765.348	1506.67	1389.2	1698.03	1503.95	1473.21	1368.44	572.803	539.463	541.971
M206T363			0.338879	3.31394	0.00136519	206.048	363.284						313.116	2013.31	2831.22	400.085	198.627	288.104	4433.38	2601.29	3143.73	3271.88	3693.84	2886.86	1330.14	1305.76	1337.4
M338T396			0.405078	2.36577	0.00137574	338.207	395.531						1388.66	2934.34	3442.92	3391.3	1693.82	2002.26	4547.37	3679.71	5018.98	6730.67	7592.39	7570.36	4454.33	4454.33	4445.32
M1186T239			0.30296	3.69697	0.00137752	1185.62	238.623						661.126	201.073	1422.11	1257.98	417.644	418.431	2972.87	3944.52	1026.09	2963.49	3038.7	2240.99	1614.8	1470.95	1614
M480T406			0.317467	2.2236	0.00137781	479.773	406.454						2048.61	1944.1	2862.44	1316.48	851.726	1070.67	3381.23	5003.87	3929.99	4376.41	3173.56	2579.97	2763.13	2880.39	2767.31
M423T96			1.23729	0.146421	0.00137794	423.164	96.2965						56680.5	28918.5	18792.1	32714.5	67038.6	30384.2	4574.03	7113.65	7658.2	3937.98	3492.3	7563.65	25842.6	23147.7	25843.2
M173T233			0.5479	2.51401	0.00138857	173.128	232.965						2145.52	5229.6	8199.55	3915.43	2887.5	1540.02	11563.6	9834.49	6706.37	11788.2	7808.64	12427.8	7893.12	8668.24	8669.71
M739T303			0.209801	1.7775	0.00138933	738.7	302.906						1505.94	974.294	1954.5	1091.37	712.163	1293.68	2123.53	1864.39	2542.29	2722.07	2034.71	2101.08	1509.03	1509.85	1530.8
M175T441			0.254384	0.61732	0.00139215	175.023	440.9						4456.76	3013.43	2426.36	3633.38	3449.59	3662.98	2037.35	1987.93	1700.82	2262.39	2511.6	2242.93	2966.49	2975.3	2966.45
M368T119			0.436461	0.310247	0.00139314	368.424	118.818						5135.66	8424.8	4270.85	8152.29	5366.19	2936.77	1360.28	2111.42	2229.36	1228.02	1970.49	1737.74	3833.3	3833.16	3860.68
M327T80			0.974039	0.678204	0.00139333	327.2	79.945						53683.7	76716.1	63268.5	80588.5	75451.8	65989	49790.6	52336.7	52440.5	37794	52130.9	37434.9	64392.2	62516.8	62543.7
M621T147			0.794177	0.268892	0.00140149	621.215	146.816						18263.8	15253.3	7305.04	28947.9	18727.2	19033.9	3427.07	4493.65	2322.73	8867.1	3966.75	5836.94	12255.1	11309.4	12255.6
M460T189			1.57186	2.36616	0.0014027	460.281	189.197						34038.3	21775.9	73739.9	2136.34	35241.2	40129.2	85642.6	88128.3	62614.9	75777.2	97646.5	80129	63855.4	62926.9	63846.4
M949T192			0.45195	2.50528	0.00141043	948.581	191.56						4914.02	843.733	4613.15	392.454	2521.3	3329.5	5491.89	8169	5398.33	6631.86	8814.75	7117.33	5072.18	5108.99	5108.98
M706T141_1			0.274035	0.519437	0.0014145	705.524	141.156						3353.59	3632.98	3879.3	4175.06	2480.41	3879.67	2941.88	1595.97	1990.42	1450.19	2356.61	781.419	3556.32	3845.4	3851.51
M291T66			0.411095	0.292644	0.00141493	291.088	66.233						3524.76	5444.78	6227.19	6703.37	2683.53	7183.09	584.514	1307.29	986.785	726.502	2416.15	3275.1	5248.79	4417.75	4486.15
M618T301_1			0.328868	1.8449	0.00142594	617.771	300.501						3561.57	1277.14	3488.68	1044.44	2613.35	3656.35	4639.76	5216.36	5240.28	4523.92	4363.98	4872.81	3328	3328.81	3104.33
M658T340			0.321248	2.6944	0.00143351	658.35	340.267						534.118	2972.66	1367.79	1786.77	487.935	447.044	2970.57	4607.29	2792.47	3771.91	3245.32	3079.95	2929.74	2813.73	2813.76
M144T347			0.507473	0.599396	0.00143586	144.065	346.693						15956.7	14100.3	15518.4	16716.5	22857.1	15090.4	13215.9	8186.35	10519	8932.64	11397.6	7831.5	13760.9	13760.6	13727.2
M489T381			0.442818	2.70287	0.00143617	489.305	381.078						1173.61	2605.97	2426.79	4854.43	1753.47	1610.82	5204.64	7770.92	4182.28	9305.43	7060.75	5465.14	4486.86	4487.52	4344.62
M371T155			1.08218	3.52266	0.00144369	371.289	155.407						4933.31	12792.5	23009.7	5002.82	4344.23	5443.92	24744.2	49642.1	41992.7	30824.8	23122.5	25274.6	20144.5	20143.5	19984.6
M479T308			0.179655	1.31695	0.00144393	478.743	308.065						2234.32	1967.18	2228.62	1603.52	2335.02	2486.44	2991.94	2846.41	2727.99	2503.25	2735.71	3124.25	2336.22	2454.57	2336.29
M319T445			0.356167	1.92025	0.0014463	319.161	445.148						1330.56	3575.47	4860.01	2457.44	1667.06	2168.79	5237.4	5003.9	5283.25	5860.49	4695.25	4757.63	4006.95	4030.38	4102.13
M363T297			0.376321	0.251918	0.00145229	363.105	296.843						2602.58	5373.32	3190.03	6091.85	3782.51	2561.12	657.115	674.802	371.688	2362.36	546.279	1333.37	2387.13	2402.15	2387.14
M861T299_1			0.255294	1.79775	0.00145576	860.738	299.277						2383.29	1106.52	2408.38	958.895	1744.36	2130.66	2617.63	3124.62	3454.23	3255.66	2821.97	4019.56	2276.17	2199.52	2194.55
M603T471			0.3219	2.97956	0.00146008	602.794	470.857						193.576	1931.96	1598.81	2338.66	125.992	162.176	2098.1	3558.46	3073.22	3799.25	2910.46	3484.24	2425.59	2425.51	2417.2
M867T118			1.07799	4.54341	0.00146469	867.319	117.891						5277.01	18184.3	7959.89	2672.8	4511.23	3446.6	20760.8	48631.2	46661.7	22525.7	30800.6	21678.8	19045	19046.3	18726.8
M736T140			0.566306	1.74123	0.00146745	735.571	139.863						9015.56	5239.39	11645.2	6951.14	10842.2	8956.56	14648.3	20068.6	14728	11404.9	15037.9	15788.1	11531.5	11533	11794.6
M602T188			0.6215	0.58993	0.00146947	601.518	187.836						21147.2	23302.5	13559.1	19651.4	22950.7	22422.4	12272.2	9628.15	16883.1	11919.8	8286.64	13591.1	16209.8	15964	16210.2
M168T78			0.559157	0.528533	0.00147553	168.065	78.247						15573.4	12676.9	10366.4	15394.2	19877	13071.1	5117.48	6868.04	6911.55	7100.25	11086.3	8877.12	11474.3	11094.1	11484.9
M119T421			0.207017	1.92969	0.00147628	119.034	421.049						1158.47	642.125	1160.72	486.303	734.81	1476.19	1921.38	1907.7	2042.7	1367.31	2181.47	1498.83	1294.69	1288.71	1365.44
M985T402_2			0.389431	5.91742	0.00147845	985.152	401.906						66.9897	867.298	2265.54	515.393	44.6252	129.189	2809.15	6297.23	2891.74	2018.35	4935.34	4061.25	1763.34	1763.37	1748.31
M964T368			0.323669	7.8643	0.00148005	964.005	368.406						33.9167	716.456	955.14	123.407	73.1628	26.5046	2012.36	3496.82	2774.92	4204.26	1490.27	1188.37	1516.41	1472.93	1516.97
M288T355			0.806444	3.2786	0.00149107	288.166	354.711						3964.75	5552.69	9074.3	7064.44	4753.11	5835.74	22095.7	33623.5	12291.6	18863.4	17384.6	14574.2	12412.8	12280.5	12281.8
M367T120			0.319038	2.1287	0.00149158	367.266	120.044						1576.08	2857.27	845.119	3072.6	1692.89	1924.29	3969.91	4530.16	3145.71	3683.69	4190.11	5957.26	3379.1	3201.78	3224.8
M416T193_1			0.406078	2.51182	0.00149653	416.233	192.835						1554.36	3698.94	4904.15	1612.13	908.999	728.879	5680.34	4880.68	5464.17	6763.44	4395.96	6492.47	3062.77	2863.77	2864.71
M765T136			0.881862	2.92244	0.00149829	764.557	135.776						6779.53	11188.6	13104.1	4913.12	6756.18	8900.89	18155.3	27574.2	30478.6	18136	39228.8	17349	14882.4	14850.2	15524.5
M823T302			0.175049	2.06526	0.00150217	822.705	301.634						782.121	399.212	752.335	206.624	707.5	648.913	1226.16	1370.21	1610.49	967.683	1165.48	881.592	941.15	943.507	990.368
M651T111			0.597539	4.10627	0.00150418	650.509	110.781						546.208	3281.77	7897.31	509.545	416.489	1193.27	12507.1	11818.2	6037.16	6333.06	11074.9	9079.18	7383.6	7384.67	7096.06
M863T301			0.275612	2.24651	0.00150635	863.211	300.969						1508.4	602.818	1976.63	121.405	1404.33	1918.65	2276.45	3171.14	2309.35	3370.91	2598.12	3195.25	2079.57	2141.83	2078.86
M1040T300_1			0.230511	2.36838	0.00151405	1039.7	300.315						773.369	337.944	1109.5	54.035	1077.49	1369.64	1470.33	2178.72	1493.59	2099.23	2224.1	1717.49	1184.2	1131.71	1126.85
M271T355			0.352044	2.21764	0.0015162	271.115	354.532						3126.72	570.49	2250.89	469.459	2401.13	3567.16	4399.01	5807.04	4364.83	4256.23	4436.88	4203.3	2810.11	2825.55	2750.49
M498T233			0.959985	4.28457	0.00151656	498.282	232.523						6275.78	3336.71	11578.9	1163.11	7818.79	4653.18	25644.3	21465	10030.4	20827.9	39985.4	31263.5	16437	16634.5	16595
M849T490_1			0.284452	9.21713	0.00151714	848.604	490.069						230.334	133.509	312.39	84.8713	173.977	396.155	3779.18	1738.4	2094.1	628.237	2304.17	1726.1	1273.16	1260.88	1273.17
M177T403			1.26892	0.235735	0.0015222	177.054	403						37661.1	59116	26271.7	65434.4	33820.6	28173.2	3398.22	3066.25	3707.66	19884.8	15907.4	13081.8	23862.6	23843.6	22904.2
M127T467			0.527908	1.53736	0.00153136	127.038	466.788						10114.1	10169.1	12919.4	9057.03	9632.04	9169.96	14726.5	17756.3	12381.4	12918	19318.2	16773.1	13461.8	13411.9	13411.8
M450T454			0.203303	1.57251	0.00153499	450.016	454.154						1526.95	1470.43	1707.05	676.118	1596.35	1724.15	2411.38	2672.63	2395.87	2170.18	2082.49	1949.93	1957.08	1954.3	2017.59
M627T299_1			1.92903	1.77184	0.00153501	626.825	298.78						132155	72682.5	135682	37777	88350	140454	176577	188559	173182	194503	153106	189756	132776	132776	132364
M516T369			0.271655	0.437679	0.00153932	516.227	369.185						4274.94	1933.55	2886.6	1980.18	2980.31	2682.83	1500.15	1325.42	864.266	1183.61	1457.69	994.915	2234.46	2174.66	2201.32
M1055T396_3			0.339438	2.67329	0.00154002	1054.98	396.274						639.292	2901.39	2953.17	757.382	588.319	643.545	3403.67	4031.52	3512.89	2814.86	4580.72	4334.11	2685.38	2735.52	2735.97
M329T448			0.441471	2.75299	0.0015458	329.193	448.395						1756.52	2916.02	3189.07	3055.91	1653.53	1724.03	6287.49	8787.25	3433.63	5101	9467.62	6277.17	4549.83	4276.87	4274.19
M156T124			0.389654	0.300641	0.00154829	155.563	124.004						6707.64	4128.04	2445.93	3413.47	3178.23	5843.61	1061.3	976.294	1350.34	900.396	1426.82	2016.41	3159.23	3011.44	3159.08
M375T359			0.993362	3.43933	0.00154862	375.234	359.496						1970.72	9304.11	26133.5	3851.25	2911.55	2170.25	22053	31551.9	18532.7	28918.4	28110.2	30217.1	15773.1	15435	15435.7
M595T236			6.53355	2.93487	0.00154949	595.288	235.787						533222	290157	993228	57541.7	385326	366782	1.57179e+06	1.82418e+06	948394	1.32728e+06	1.15715e+06	878918	1.05081e+06	1.04476e+06	1.04478e+06
M489T422_2			0.418929	3.40076	0.00155282	489.229	421.655						631.931	3391.7	1996.32	1839.13	779.347	710.022	4786.8	8057.39	3039.91	6068.24	6143.32	3696.22	5000.67	4474.13	4462.16
M637T402			0.389233	2.15717	0.00155699	637.355	401.74						1826.8	5004.73	3163.32	4164.44	1120.63	1458.46	5883.75	5873.09	7460.86	5274.53	4882.71	6732.58	4684.38	4596.31	4685.15
M537T40			0.565031	3.1118	0.00156724	537.382	40.342						1434.4	3079.09	9132.95	1738.87	1142.23	696.327	8923.97	8911.2	6383.95	9130.23	10106.2	10141.8	6060.87	5861.49	5892.2
M337T27_2			0.258218	3.4839	0.00157236	337.154	27.253						1131.56	461.28	354.963	479.841	565.711	622.534	1071.91	2835.9	1619.87	2848.69	2772.12	1448.92	1008.61	1008.54	1025.59
M244T266			0.282222	0.626768	0.00158263	244.176	265.643						5662.95	4279.85	3807.99	3584.93	5615.94	4959.29	3556.83	3122.59	3116.14	2525.69	2663.86	2508.57	4419.48	4369.85	4419.29
M939T187			1.81322	2.52633	0.00158331	938.516	186.511						55821	23259.2	95803.6	4779.98	53976.1	29762	109870	113403	150703	92742.7	103435	95284.9	106061	115256	105311
M572T327			0.255019	3.66021	0.00158773	572.375	327.008						145.126	937.275	1453.5	148.704	112.408	93.1466	1685.43	2169.98	1082.85	2273.41	1914.15	1452.76	1415.91	1360.36	1425.48
M97T102			0.379778	1.61884	0.00159809	97.039	101.85						4146.92	6990.87	6537.81	3120.45	4936.55	5463.62	8573.71	6777.84	9952.22	9023.2	8674.88	7499.75	6717.58	6873.05	6872.3
M807T302			0.370798	1.59427	0.00159903	806.667	301.67						5783.79	3424.99	6309.36	2299.15	4728.41	5736.17	7773.91	7494.48	7836.19	7383.43	6904.74	7696.05	5836.09	5824.27	5506.82
M378T245			0.693206	3.47184	0.00160794	378.204	244.965						1944.31	6291.99	7910.36	4324.93	1757.95	1881.22	10366	12139.6	7811.67	22134.3	15049.4	16207.8	9250.56	8541.31	8561.53
M190T328			1.4078	3.93461	0.0016108	190.049	327.513						13441.7	10145.8	23858.5	8198.41	12964.4	18523.8	44698.4	102414	48331.2	34225	56931.1	56232.9	34826.2	39494.7	39510.5
M812T135			1.02372	0.448394	0.00161089	811.602	134.823						45569	29886.1	28284.2	31135.5	44492.4	57860.3	13170.6	15364.9	25728.6	16538.7	17587.8	17980.8	28224.3	27635.8	28221.3
M683T150			0.210878	1.84249	0.00161257	683.34	149.587						952.782	1230.44	1002.53	1331.6	966.684	1376.91	1610.9	2553.27	1477.78	1988.48	2790.59	2220.2	823.847	771.399	777.324
M760T426_1			0.174286	1.8877	0.00161312	759.983	426.07						633.743	720.232	1021.3	309.301	575.622	1002.25	1778.22	1358.87	1261.94	1074.66	1356.96	1215.56	932.594	868.319	933.575
M96T263			0.274454	0.482339	0.0016151	96.0777	263.083						3979.88	2876.86	2293.39	2330.87	3887.87	3532.25	2459.8	1156.53	1794.24	1292.3	1490.69	923.183	2994.42	2994.42	2978.86
M640T268			0.212953	0.612117	0.00161849	640.158	268.433						2821.16	2239.75	1533.58	2752.17	2424.28	2798.43	1807.5	1521.43	1183.89	1374.98	1594.17	1436.18	2157.96	2123.07	2138.69
M569T301			0.994762	1.53757	0.00162783	568.782	300.992						47303.6	30595.7	47121	20122.3	36828.6	47937.5	58385.4	61011	60906.1	61114.2	52628.9	59456	46969.5	47141.6	46969.1
M1192T401_1			0.312152	5.55509	0.00163524	1191.63	400.988						41.9473	968.357	1349.78	284.406	32.8276	65.687	2339.65	2088.73	2269.97	4614.64	2316.67	1607.99	1757.41	1638.32	1641.33
M581T239			0.65662	2.96009	0.00163831	581.307	238.725						5359.74	3863.46	6488.28	2177.55	4443.6	6636.15	14496.2	19479.3	5943.77	11133.6	19307.9	15389.4	8854.81	10075.2	10082.6
M786T285			0.531514	7.34333	0.00164374	786.414	285.241						389.388	1783.39	2214.88	729.456	364.788	191.609	3861.66	12116.1	7023.5	9511.4	5474.72	3675.03	3561.99	3509.4	3562.6
M1077T230			0.245135	2.45192	0.00164585	1077.48	230.289						1220.93	462.591	1425.04	112.323	875.488	991.988	2580.63	2822.38	1759.69	1771.24	1521.27	2021.06	1450.49	1353.24	1447.12
M868T318			0.191919	2.93864	0.00165512	867.565	317.504						280.583	43.9396	853.779	62.6641	583.854	388.773	961.896	1026.84	735.067	1123.28	1545.85	1112.02	900.437	901.678	843.917
M612T236			3.07855	3.01767	0.00165629	612.315	235.787						113793	70082.9	208018	19484.5	82159.1	80263.8	187805	361990	188418	268089	411017	314225	216842	218240	216842
M305T61			0.527445	3.61412	0.00165926	305.12	60.971						1530.98	3916.43	3595.48	1256.4	1685.01	2447.81	3939.47	13931.6	7015.19	7724.22	8574.71	10974.1	4090.45	4143.94	4740.66
M429T398			0.340105	5.76473	0.00166036	428.747	397.555						162.911	871.458	1024.85	442.778	463.808	192.167	4004	3948.74	1090.36	4088.91	3677.93	1394.94	1719.23	1719.98	1641.46
M658T146_1			0.501229	0.310079	0.00166097	658.405	146.109						6658.66	8890.11	3182.01	11388.5	6915.37	6322.57	810.267	2107.73	2079.3	2672.61	2514.82	3259.45	3364.72	3552.76	3369.33
M373T188			0.570769	3.81012	0.00166239	373.268	188.415						165.75	2547.49	8451.21	2529.47	119.392	321.897	5060.6	9727.48	10811.9	8866.34	8996.58	10394	6918.01	6873.84	6874
M388T380			0.72737	2.38624	0.00166642	388.254	380.484						3499.02	11119.4	14355.5	8839.97	3609.93	3131.93	18240.2	23310.1	12494	18721.7	17669.9	15884.8	8547.55	9207.47	8551.6
M945T190			0.406891	2.61524	0.00166726	944.581	189.677						2290.55	677.07	4051.7	1262.49	2095.12	1918.5	5129.06	5975.14	3943.07	4173.11	8085.41	4849.71	3616.68	3618.94	3781.48
M329T164			1.71622	5.8404	0.00167189	329.242	163.776						2853.15	11845.4	47230.7	6303.05	2600.85	3645.87	39826.2	87585.1	42960.9	79883.3	119306	65426.7	46092.1	46113.3	45368
M1044T181			1.26467	2.59972	0.00167534	1043.7	180.781						24074.1	11596.9	39350.7	1016.79	23682.8	19840	58303.7	50145.8	33528.8	42206.5	70790.4	55850.2	36427.3	37352.7	37350.7
M830T127			0.561987	0.490213	0.0016796	830.285	126.594						12558	14131.3	11731.3	12889.3	19360	11596.2	3501.89	5987.38	3652.34	8406.77	10136.3	8643.22	11545.9	11212.7	11209
M515T317			0.358744	2.86737	0.00169799	515.354	316.726						553.32	2546.57	1685.61	2114.24	1034.39	525.003	3423.36	3871.32	2577.81	5534.38	5635.09	3213.46	3238.67	3401.63	3402.39
M852T153			0.53448	3.93127	0.00171851	851.529	152.704						403.443	2320.03	7278.08	797.429	72.5072	653.585	5082.22	8627.5	5864.55	8891.48	7404.49	9437.95	4794.42	4736.89	4807.15
M587T498_3			0.139725	2.02302	0.00173227	586.917	498.392						323.488	450.077	728.786	176.686	369.884	257.691	820.191	712.209	693.02	695.684	740.747	1004.47	615.105	656.684	657.851
M346T38			0.722917	3.72665	0.00175231	346.128	37.728						1119.84	9568.43	10477.5	247.369	992.436	2033.69	9866.01	20486.7	16882	9599.77	17798.7	16443.4	11053.3	11045.9	10649.8
M879T188			1.48862	0.536794	0.00175479	878.575	187.861						96628.6	128256	65696	114719	95393.7	113131	51077.1	41738.6	84684.4	60346.8	37521.9	54128.2	70371.5	70084.2	70371.6
M520T232			0.249026	2.28523	0.0017581	519.654	232.439						1055.6	327.713	1413.4	1421.17	1070.69	994.321	2965.38	2520.51	1544.15	1708.12	3238.92	2380.82	1858.51	1895.95	1858.41
M1101T301			0.288299	1.80598	0.00175888	1100.6	301.04						2687.89	1436.7	3185.77	655.858	1999.74	2818.27	3785.8	3776.57	3915.07	4174.13	3376.51	4059.99	2635.2	2781.64	2784.01
M738T106			1.31667	0.04774	0.00175981	738.457	105.55						40612.1	68828.4	7778.24	24137.1	36839.5	45624.2	1313.11	2251.94	1488.93	2508.25	859.877	2263.03	12213.8	12382.5	12363.8
M1053T396_2			0.235198	2.58281	0.00176808	1052.83	396.295						250.434	1382.93	1389.61	618.002	370.34	282.813	1590.4	1544.59	1790.94	1634.63	2559.4	1970.96	1271.76	1270.98	1310.12
M749T135			1.19959	2.24686	0.00177397	748.526	135.464						41063.6	12669	26231.9	7875.23	27597.8	30926.5	46650.5	70862.5	37215.7	55675.7	67622.7	50832.9	37511.7	37294.9	37344.5
M388T86			1.66435	0.497952	0.00177493	388.253	85.951						85698.2	185724	106805	124678	134614	101351	58826.4	75424.8	56612.4	57696.6	60805.3	58556.6	113217	113625	113218
M261T308			0.285055	0.374003	0.00177751	260.919	308.139						3372.18	3101.11	1563.95	3551.01	1948.49	2057.38	714.07	607.516	479.099	1547.24	1228.94	1255.38	1873.21	1871.56	1762.69
M500T179			1.6542	2.19314	0.00178129	500.312	179.089						55634.2	35412.4	74897.7	12724.6	49565	54543.1	103078	107597	68765	83190.8	118840	138700	116596	116592	114907
M921T302			0.252426	1.94026	0.00180469	920.68	301.758						1399.39	817.752	1357.14	626.384	1506.2	2546.97	2674.24	3024.73	3124.45	2333.94	2497.76	2359.43	2105.98	2105.04	2066.82
M461T347			0.313702	3.00653	0.00180504	461.291	346.697						561.1	1784.34	1876.46	674.639	726.692	589.385	2913.81	4893.53	1969.83	3640.34	2371.38	2889.52	2166.03	2165.1	2246.01
M472T154			0.370609	3.55202	0.00181317	472.251	153.998						948.937	1176.85	1733.44	1289.96	435.881	921.025	3220.24	6167.94	4778.86	4252.18	2949.5	1741.04	1305.03	1312.49	1380.72
M998T182			3.56474	2.93258	0.00181392	997.624	182.031						164504	61976.1	288787	6282.59	146903	124871	413838	401142	225450	301176	553835	431046	280190	280187	278960
M500T269			0.497756	4.59706	0.00181521	500.355	269.442						868.543	1714.97	4770.47	608.178	111.393	391.316	5171.14	9042.19	5482.32	9981.62	4924.03	4312.17	3925.74	3880.25	3879.71
M611T298			0.285987	0.488829	0.00183031	610.934	297.774						3330.76	4940.21	2801.14	3591.45	2388.48	2864.68	2009.84	1752.5	1181.49	1301.46	2169.58	1321.01	3043.31	3002.08	3043.21
M348T501			0.385512	1.76473	0.00183095	348.069	501.262						4566.93	4469.36	5641.94	2124.92	3505.4	4477.41	6838.23	7246.65	6380.16	5478.49	8470.87	9326.13	5949.04	6163.07	5945.21
M875T158			0.36296	3.3826	0.00184045	874.588	157.899						471.376	1618.9	2555.99	2022.32	157.933	104.401	4414.3	4998.42	2614.62	2242.26	5133.22	4041.68	3206.46	3125.82	3209.56
M805T301			0.373679	1.56849	0.00184603	804.672	301.141						6009.39	3540.41	6375.8	2515.66	4955.57	6509.26	7991.48	7858.79	7886.18	7555.7	7588.87	8026.41	6067.03	6067.12	6160.51
M275T264			0.257493	0.567595	0.00184758	275.244	264.292						3904.55	3394.4	1846.79	3188.33	3956.98	3477.43	2163.63	1795.15	1911.86	2288.19	1496.59	1565.09	2169.52	2203.3	2090.45
M864T423			0.293944	1.78819	0.00185663	864.111	422.969						2676.53	1995.3	3215.83	697.783	2139.11	2639.49	4113.1	3879.41	3438.9	3299.88	4533.16	4633.02	3257.09	3259.58	3259.58
M728T404			0.433088	0.28046	0.00185881	728.203	403.81						4964.97	5834.73	4196.64	9163.73	2532.9	6547.42	1617.29	2302.82	1053	690.31	1701.04	1958.13	4346.78	4344.48	4206.78
M555T241			1.05672	4.56942	0.00185964	555.292	241.498						7937.08	4062.76	15098.6	1624.61	5792.34	5469.29	29405.3	35093.8	8969.22	24238.5	47346	37654	18664.3	18289.8	18665.1
M407T278			0.491127	3.79741	0.00185995	407.264	277.604						911.563	2637.21	3598.88	2190.24	912.649	705.619	5536.4	11694.3	3949.75	7966.53	7269.16	5188.94	4697.13	4678.1	5045.31
M413T340			0.32792	2.1767	0.00186507	413.214	339.637						1582.26	2157.07	2733.7	2774.77	1845.5	1502.33	3577.87	3202.84	5758.56	5835.84	3292.98	5748.84	2481.2	2194.92	2479.71
M254T442			0.124837	0.591885	0.0018695	253.997	441.538						848.102	766.124	549.067	858.507	907.81	871.14	333.051	419.303	336.333	677.665	489.389	585.752	832.18	823.78	823.627
M629T455_1			0.209025	0.462373	0.00187243	629.191	455.457						1925.74	1813.38	1325.64	1641.86	2495.27	1376.17	462.334	570.652	486.018	1281.57	1076.4	1014.04	1292.54	1268.04	1292.19
M1066T180			0.813662	2.24833	0.00187743	1065.69	180.141						9548.98	2808.38	18497.4	15140.8	10969.6	8238.06	24241.6	29398.7	15166.2	22875.8	31586	23330.1	20443.1	19545.4	19530.6
M188T377			0.326874	0.382826	0.00187905	188.066	376.846						4435.09	4717.05	3943.78	4149.99	2902.76	2556.81	907.731	2369.18	665.565	907.97	3170.83	670.973	3517.4	3712.82	3712.77
M357T158			3.8476	7.97861	0.00188437	357.274	157.952						13723.3	53638.6	143530	25372	8517.96	16123.2	251491	637716	471431	221715	227713	271595	185605	184669	181008
M81T118_2			3.84744	2.18075	0.00188845	81.0447	118.115						136328	474543	387840	254198	229095	134345	519945	583621	789412	416665	654965	560247	426212	426212	426697
M753T146			0.268076	0.582451	0.00188882	753.484	146.227						4168.55	5000.87	3573.88	3470.65	2655.12	3862.88	2271.87	2110.89	2980.77	2131.4	1422.8	2322.51	2971.03	2970.97	3031.1
M1057T396_2			0.263136	2.3068	0.00189129	1057.27	396.161						555.689	2046.82	1880.01	894.503	652.373	603.637	1970.84	2552.81	2554.17	2054.53	3352.29	2816.42	2029.21	2027.16	1950.47
M657T448_1			0.509917	3.23648	0.00190352	656.838	447.842						1755.15	1912.2	5265.8	1055.81	2035.89	2688.55	8135.61	8843.93	3884.78	5251.29	11279.9	10224.1	4948.97	4948.99	5004.11
M160T276			0.648945	0.376259	0.00190543	160.036	276.433						8290.13	22082.4	10142.1	15356.6	14125.2	15840.9	4778.74	3419.87	3686.47	5827.32	5707.3	8877.29	14675.2	13793.3	14643.1
M919T121			0.67102	2.79398	0.00192692	919.301	121.15						3730.86	11868.8	8136.38	3598.57	3032.9	1431.85	17663.5	17932.9	10215.8	15352.5	18220.1	9461.93	13572.2	13510.6	11496
M586T171			1.08995	0.131431	0.00193423	586.2	171.421						27624.9	33079.5	2260.77	41941.6	22720.7	33861.2	2777.79	4223.31	2484.23	5017.78	2165.46	4556.11	8822.85	8818.78	8605.03
M393T156			0.738133	2.743	0.00193897	393.274	155.972						2269.06	8437.49	16638.8	3716.19	2620.5	3137.86	11368.5	18252.9	16252.3	19159.3	17938.8	18025.2	12761.1	12682.1	12760.8
M307T254			0.499032	0.348581	0.00194986	307.168	254.107						7783.82	8546.78	5643.57	12123.9	10970.9	4687.5	1544.33	1811.56	1843.15	3844.83	4503.59	3796.73	6988.64	7069.02	7060.13
M513T298			0.18725	0.665269	0.00196015	512.958	297.812						2341.48	2977.9	2299.05	2228.62	1812.34	2059.54	1879.66	1652.52	1498.9	1400.83	1214.7	1480.17	2263.42	2263.63	2282.57
M903T302			0.272554	1.63443	0.00196711	902.651	301.585						3147.54	1607.31	3142.29	1172.18	2749.16	2951.68	3947.69	3975.91	4171.37	4091.92	3451.45	4502.52	3126.27	3245.21	3125.3
M337T105			0.358144	0.642945	0.00197792	337.236	104.639						8047.13	10438.5	10117.4	9056.56	10713.2	7705.45	8377.67	7320.39	5161.87	5587.88	5070.24	4537.23	9884.6	9886.64	10207.6
M877T157			0.397303	3.59681	0.00197866	876.601	157.433						381.151	836.173	3472.53	146.021	1806.27	791.316	4927.07	5338.58	2860.39	2469.4	6041.75	5099.55	3961.39	4047.45	4049.27
M375T390			0.662431	2.67776	0.0019885	375.223	390.304						1703.41	6506.55	5633.45	13055.6	3609.14	1230.36	14189.8	17362.4	10537.6	13498.5	17774.5	11625.2	7485.71	8369.92	7480.1
M402T468			0.256048	2.45014	0.00198918	401.736	468.486						590.343	2344.11	1087.58	909.141	398.731	458.736	2647.78	2859.64	2240.44	2566.96	2044.97	1823.2	1873.21	1761.07	1760.77
M204T67			0.43053	1.6229	0.00199684	204.086	67.099						6689.45	4803.81	7774.18	3814.86	6737.83	5314.97	8493.77	10405	7079.55	9039.08	10772.3	11231.1	7491.68	6699.46	7489.96
M727T303			0.183593	1.90141	0.0019969	726.723	302.502						906.53	523.301	896.11	227.24	1026.98	1119.61	1738.63	1513.14	1473.78	1776.28	1216.78	1217.58	1107.83	1070.05	1069.08
M921T187			2.00477	2.25042	0.00199851	921.489	186.511						83380.4	50779.2	131065	10769.9	73931.6	48922.3	144076	153781	203321	128148	137675	130577	114263	114270	111974
M1103T302			0.260124	2.02704	0.00199852	1102.59	301.645						1547.15	592.345	2005.31	293.042	1522.39	2305.68	2845.02	2589.51	2981.31	2722.88	2411.99	3204.61	1845.83	1859.09	1859.02
M964T77			1.32975	6.55814	0.00200565	964.36	76.8785						445.439	22614.5	16392.4	607.343	895.522	328.811	24057.9	68833.9	45988.6	32722.5	70308.3	28834.7	20934.1	19644.2	19466.7
M555T31			1.31582	1.73181	0.00200698	554.549	31.127						51720	48376.8	61074.1	40711.8	53061.2	43664.7	63643.8	105632	102236	80672.6	103144	61803.8	55848.8	55859.6	54738.9
M503T477			0.214078	1.89204	0.00203787	503.318	477.207						911.724	1542.52	1481.72	956.653	857.782	516.117	1915.15	2487.49	1361.34	2221.02	2077.56	1793.92	1222.65	1072.61	1066.82
M402T402			0.727265	0.301215	0.00205268	402.102	402.447						13474.8	21378.2	10418.9	23191.2	11336.9	10502.9	2641.22	2587.38	1910.61	7650.84	6711.43	5699.08	9337.31	9343.23	9139.06
M471T301			1.07652	1.48813	0.00205811	470.806	301.029						60634.7	41811.6	58645.5	26825.3	48257.2	63221.5	76245	75815.4	75501	75665.3	66321.6	75992.2	59174.4	60209.2	59493.1
M735T385_1			0.404629	3.02318	0.00206053	734.904	385.401						1116.5	1451.4	4401.13	677.32	437.515	1230.89	5154.47	6463.87	4242.96	5221.02	4024.55	3053.32	3238.17	3237.95	3152.54
M741T170			0.289866	0.319583	0.00206908	740.569	169.994						3571.69	3039.57	1639.67	3005.97	1348.54	3054.97	581.319	329.594	1725.5	525.306	1338.06	505.021	1477.85	1546.95	1477.66
M386T419			0.167414	1.60504	0.00207019	386.024	419.118						1017.51	644.926	1231.86	1136.07	750.85	1102.98	1513.02	1935.44	1467.38	1159.3	1756.52	1612.71	1186.25	1222.4	1186.96
M249T46			1.38729	4.66204	0.00207736	249.069	45.838						2315.44	19855.6	29531.3	3946.49	6089.43	5156.32	27368.1	91684.7	43139	48393.4	56309.6	44970.5	38344.1	41659.7	41941.5
M923T299_1			0.410124	1.63711	0.00208361	922.755	299.025						6810.48	4359.13	7424.53	2406.41	4994.05	7119.68	8655.16	9286.16	8312.38	9821.38	8246.1	9890.43	7131.71	6952.5	7132.07
M1058T181			0.673465	1.94533	0.00208937	1057.62	180.981						11348.2	7009.16	15053.2	986.764	13762.5	8932.34	19664	18318.5	16548.7	16926.6	20423.7	19181.5	18513.4	17722.3	18501.9
M549T210_2			0.804989	0.127713	0.00209484	549.248	210.15						23612.8	10544.7	4681.29	12158.8	13265.7	23828.2	874.354	2085.54	1509.75	2287.18	2041.87	2451.79	6292.5	6434.77	6292.1
M916T356			0.296561	2.30116	0.00209946	915.502	356.317						458.284	1608.01	2742.93	1850.93	624.964	815.106	2134.19	3120.9	3300.72	3878.19	3220.76	2985.12	1791.42	1792.2	1695.39
M661T262			0.587689	2.66206	0.00210217	661.274	261.793						6414.24	3452.08	6045.15	1928.77	3589.61	4922.37	13432.6	18770.7	8861.58	10637.7	10865.6	7583.21	7076.69	7220.28	7077.57
M782T230			0.279007	2.07946	0.00210988	782.402	229.565						1184.41	2185.72	2158.83	682.247	1611.63	1328.1	2885.88	3049.98	2153.91	3364.39	3021.04	4553.79	2370.8	2371.99	2524.33
M765T301			0.272151	1.7858	0.0021107	765.235	301.125						2204.08	1360.27	2839.77	517.194	2046.74	2494.48	3670.33	3158.83	3313.64	3028.27	3493.35	3805.39	2697.04	2694.26	2531.76
M654T471			0.522308	4.86025	0.00211071	654.35	470.786						579.178	829.824	4963.58	878.658	838.984	800.782	7140.77	7537.25	2797.86	5093.05	10117.2	10526.4	4291.5	4161.04	4161.39
M1058T396_1			0.381078	2.51153	0.00211391	1057.55	396.147						781.792	5245.06	2457.62	2307.85	793.958	762.878	6202.28	4802.41	5409.47	5369.83	4592.69	4638.59	4305.04	4061.9	4304.87
M328T66			1.24314	3.54934	0.00211487	328.117	65.577						6916.22	25386.1	24658.1	4969.29	7559.09	7445.42	25639.4	73876.3	48071.6	43714.9	50773.4	30990.4	27258.4	27027.2	30416.9
M549T33_3			0.87304	0.413571	0.00211725	549.408	33.179						38148.1	19682	18645.5	19714.3	37513.3	27381.3	9124.5	9222.49	8933.72	12588.6	11840.5	14910.1	20741.7	21107.4	20742.7
M592T66			2.16868	0.203102	0.00212903	592.265	66.484						216703	169151	141822	127626	64597.3	59210.9	9555.32	29982	39721.7	24006	20376.5	34597.1	91286.1	89432.3	89385.3
M110T276			0.211633	0.519838	0.00213468	110.059	276.369						2317.41	1500.85	1651.86	1373.22	2055.9	2508.81	1093.89	751.062	665.314	950.428	1482.9	986.745	1678.31	1713.66	1713.63
M631T233			0.265454	1.80902	0.00213494	631.167	233.003						2494.17	2322.3	1467.19	1324.08	2517.43	1616.12	3704.88	4978.15	3444.65	3276.17	2803	3033.33	3276.4	3275.64	3118.6
M464T192			0.443289	1.77214	0.00213952	464.278	192.201						5416.26	4384.3	6786.82	3011.53	5951.83	4562.73	7108.85	8224.88	6581.49	9573.56	10632.6	11243.8	7746.45	7744.35	8013.27
M245T377			0.397095	2.01055	0.00214026	245.113	376.688						4281.24	1867.58	5439.74	1868.5	3726	1983.44	5720.81	5278.27	5490.72	6608.69	6999.71	8436.94	3960.37	3950.72	3960.37
[truncated: 7,734 more rows]
