# Supplementary material for: Multi-Omics Reveals the Effect of Population Density on the Phenotype, Transcriptome and Metabolome of Mythimna separata
Source: Insects. 2023 Jan 10;14(1):68. doi: 10.3390/insects14010068 (PMC9861010; doi:10.3390/insects14010068)
Supplement: Supplementary file 1 [file insects-14-00068-s001.zip › Table S5.xlsx]

## Sheet: B_vs_A
ID	adduct	Name	VIP	Fold change	p-value	m/z	rt(s)	HMDB	KEGG	SuperClass	Class	SubClass	S-1	S-2	S-3	S-4	S-5	S-6	G-1	G-2	G-3	G-4	G-5	G-6	QC-1	QC-2	QC-3
M760T172	[M+CH3COOH-H]-	Sm d34:2	1.24083	2.66379	1.30969e-05	759.564	171.958			Lipids and lipid-like molecules	Sphingolipids	Phosphosphingolipids	16821.4	15714.9	27270.4	15935.7	27891.9	15852	42325	58643.2	58869.5	58931	57294.2	42223.5	28527.8	28992.9	28992.1
M919T185	[M-H]-	Timosaponin b ii	5.71325	4.16299	2.21581e-05	919.474	185.266			Lipids and lipid-like molecules	Steroids and steroid derivatives	Steroidal glycosides	226791	129477	547880	21600.4	224093	87956.4	928734	999222	820197	893603	829231	681950	482331	483959	482332
M191T332	[M-H]-	Quinate	10.8002	0.399176	3.03038e-05	191.057	331.935	HMDB0003072	C06746	Organic oxygen compounds	Organooxygen compounds	Alcohols and polyols	4.32001e+06	4.58647e+06	3.37087e+06	3.86628e+06	4.5359e+06	3.48651e+06	1.81534e+06	613494	1.21949e+06	1.72029e+06	1.78456e+06	2.49335e+06	2.89025e+06	2.941e+06	2.89138e+06
M317T360	[M+Cl]-	1,4-d-xylobiose	4.77334	0.208002	3.62616e-05	317.055	360.405		C01630	Organic oxygen compounds	Organooxygen compounds	Carbohydrates and carbohydrate conjugates	521706	775310	433007	735260	502828	480877	76989.8	69116.4	42711.3	197192	128649	202738	355162	364483	355195
M346T420	[M-H-O3S]-	Adenosine 5'-phosphosulfate	4.68357	2.49742	6.18343e-05	346.056	420.012	HMDB0001003	C00224	Nucleosides, nucleotides, and analogues	Purine nucleotides	Purine ribonucleotides	323062	285922	473327	77851.4	305403	378932	847916	838437	738780	557446	818917	804998	499778	503329	503407
M762T171	[M+CH3COOH-H]-	Sm d34:1	1.44908	2.42886	0.000135869	761.579	170.78			Lipids and lipid-like molecules	Sphingolipids	Phosphosphingolipids	28663	31419.9	40390.4	30780.6	37373.4	27719.4	55862	89521.4	79317.1	102268	90597.3	59333.6	41536.2	42505.9	41533.3
M522T226	[M-H]-	2-amino-3-[hydroxy-[2-hydroxy-3-[octadec-9-enoyl]oxypropoxy]phosphoryl]oxypropanoic acid	3.00757	3.60705	0.000208058	522.282	225.622			Lipids and lipid-like molecules	Glycerophospholipids	Glycerophosphoserines	83305.5	34845.5	154923	8551.47	92286.1	69866.3	309155	253350	167982	219671	349268	301306	162968	164463	162978
M144T149	[M-H-CO]-	8-hydroxyquinoline-2-carbaldehyde	3.92199	3.14623	0.000215563	144.045	149.416			Organoheterocyclic compounds	Quinolines and derivatives	Hydroxyquinolines	83102.1	169637	312934	57432.1	124572	144317	358829	566606	322683	573280	479415	505608	326255	325021	329609
M153T25_2	[M-H]-	.beta.-resorcylic acid	4.10108	0.130967	0.000308761	153.019	25.081	HMDB0029666		Benzenoids	Benzene and substituted derivatives	Benzoic acids and derivatives	517211	225515	366561	695774	305133	444656	38995.5	37469.7	38210	67722.3	82779.4	69423.7	229453	248392	229267
M563T318	[M-H]-	Schaftoside	1.05221	0.243592	0.000335012	563.138	318.064		C10181	Phenylpropanoids and polyketides	Flavonoids	Flavonoid glycosides	26248.8	38428.1	16343.2	44687.1	31407.1	23971.3	6812.44	6046.23	4121.55	10754.5	8627.91	7748.33	18005.9	18161.9	18005
M561T178	[M-H]-	6-[4,5-dihydroxy-6-methyl-3-[(2s,3r,4r,5r,6s)-3,4,5-trihydroxy-6-methyloxan-2-yl]oxyoxan-2-yl]-5,7-dihydroxy-2-(4-hydroxyphenyl)chromen-4-one	1.12129	0.0648504	0.000409605	561.158	177.872			Phenylpropanoids and polyketides	Flavonoids	Flavonoid glycosides	8677.36	26793.9	31366.4	45716.4	46438.4	30766.7	1599.77	1977.37	934.638	901.352	3872.22	3020.6	20362.7	20341.6	18901
M214T382	[M-H]-	sn-Glycerol 3-phosphoethanolamine	1.20925	3.9047	0.000580347	214.048	382.028	HMDB0000114	C01233	Lipids and lipid-like molecules	Glycerophospholipids	Glycerophosphoethanolamines	16058	10136.2	10988.2	7434.48	13590.5	12274.1	32652.3	73018.5	34543.2	59958	39044	35992.9	24436.3	24738.5	24440
M109T25	[M-H]-	Hydroquinone	1.3852	0.347627	0.000583159	109.029	25.028	HMDB0002434	C00530	Benzenoids	Phenols	Benzenediols	75648.5	44411.6	59817.9	77263.5	45731.8	71338.3	8426.67	8301.21	11572.1	36909.7	28785.7	36090.5	38946.4	39058.2	37078.9
M297T42_2	(M-H)-	Pristanic acid	1.72021	2.60698	0.000643778	297.279	42.138	HMDB0000795		Lipids and lipid-like molecules	Prenol lipids	Diterpenoids	58692.8	35688.6	74655.2	11660.2	24095	29059.4	95802.9	142801	86250	91893	103270	89628.4	53813.1	64420.8	64551.6
M159T385	(M-H)-	2-Oxoadipic acid	1.15259	0.54425	0.000662057	159.029	384.782	HMDB0000225	C00322	Organic acids and derivatives	Keto acids and derivatives	Medium-chain keto acids and derivatives	64237.8	58607.4	47207.6	66574.7	72295.5	51691.1	28023.7	22765.1	21418.2	41072.4	45600.5	37384.4	43848.7	44609.8	43849.7
M129T440	[M-H]-	Citraconic acid	4.04312	0.407213	0.000898098	129.02	440.159	HMDB0000634	C02226	Lipids and lipid-like molecules	Fatty Acyls	Fatty acids and conjugates	718373	504171	302429	573626	647184	554631	169680	145322	118104	361964	254255	294647	409556	417535	409444
M367T164	[M-H]-	(1r,3r,4s,5r)-1,3,4-trihydroxy-5-[(e)-3-(4-hydroxy-3-methoxyphenyl)prop-2-enoyl]oxycyclohexane-1-carboxylic acid	5.90586	0.21563	0.000982308	367.102	163.901			Organic oxygen compounds	Organooxygen compounds	Alcohols and polyols	531760	1.20882e+06	630489	1.22031e+06	1.52924e+06	806216	113206	131816	58453	373108	248164	353256	650627	697337	651442
M227T47	(M-H)-	Myristic acid	3.44386	2.25059	0.00106613	227.201	46.696	HMDB0000806	C06424	Lipids and lipid-like molecules	Fatty Acyls	Fatty acids and conjugates	237018	227370	274568	87889.2	239500	213008	358530	501728	373696	383502	609314	652534	326417	327303	347951
M195T370	[M-H]-	D-gluconate	1.48878	0.453048	0.00119207	195.05	370.053	HMDB0000625	C00257	Organic oxygen compounds	Organooxygen compounds	Carbohydrates and carbohydrate conjugates	104963	67218.6	77667.9	50141.1	110213	88084	38715.8	38923.1	22543.3	31988.2	41410.6	52167.2	57150.4	58353.2	57151.6
M151T230	[M-H]-	Xylitol	1.6976	0.431702	0.00212717	151.061	230.207	HMDB0002917	C00379	Organic oxygen compounds	Organooxygen compounds	Carbohydrates and carbohydrate conjugates	112277	90049.1	180121	127989	118887	83048.5	46504.1	35528.3	27038.7	49329.1	83672.2	65459.6	75666	75904.5	74877.3
M421T175_2	[M-H]-	Lovastatin hydroxy acid	16.7077	4.17617	0.00226943	421.27	174.714		C21130	Organic acids and derivatives	Hydroxy acids and derivatives	Medium-chain hydroxy acids and derivatives	60256	1.45306e+06	7.86501e+06	1.39239e+06	35672.9	76899.4	5.47343e+06	8.32053e+06	8.14274e+06	8.54203e+06	5.50537e+06	9.46641e+06	4.54488e+06	4.60465e+06	4.60559e+06
M455T34	[M-H]-	Flavin mononucleotide (fmn)	2.83619	0.124523	0.00236861	455.099	34.114	HMDB0001520	C00061	Nucleosides, nucleotides, and analogues	Flavin nucleotides		198095	327378	84961	196689	386141	124758	32920.6	20857.4	39792.7	37455.6	13291.3	19806.9	113561	108540	113556
M173T440	[M-H]-	Cis-aconitate	3.48701	0.400272	0.00260937	173.01	440.157	HMDB0000072	C00417	Organic acids and derivatives	Carboxylic acids and derivatives	Tricarboxylic acids and derivatives	618876	343333	211257	415984	518793	396087	169076	106380	85063	250223	180053	211619	303115	314242	314473
M225T182	[M-H]-	Porphobilinogen	1.96964	0.148273	0.00304882	225.112	181.844	HMDB0000245	C00931	Organic nitrogen compounds	Organonitrogen compounds	Amines	145155	64538.6	40747.4	37017.4	125653	126920	10240.1	12235.7	6731.73	15402.2	13048.3	22414	41950.9	41336.7	41945.3
M395T178	(M-H)-	Estradiol Cypionate	1.14558	3.59002	0.00308075	395.253	178.368						174.423	12741.2	39290.8	6703.96	1640.97	1074	27595.7	35965.4	34229.6	38957.1	34014	50474.5	25525.8	24217.3	24537.2
M365T93	[M-H-H2O]-	17,20-dimethylprostaglandin f1.alpha.	1.76131	2.66124	0.00320253	365.268	93.249			Lipids and lipid-like molecules	Fatty Acyls	Eicosanoids	51745.8	42943.1	76793.7	22576.3	35752.4	40509.4	91702.4	143471	70297	185930	140608	87378.9	58462.4	55232.8	58465.4
M593T235	[M-H]-	(2r,3s,4s,5r,6r)-6-[1,7-bis(4-hydroxyphenyl)heptan-3-yloxy]-5-[(2s,3r,4r)-3,4-dihydroxy-4-(hydroxymethyl)oxolan-2-yl]oxy-2-(hydroxymethyl)oxane-3,4-diol	11.2404	3.47052	0.00338529	593.274	235.082			Phenylpropanoids and polyketides	Diarylheptanoids	Linear diarylheptanoids	1.28982e+06	714439	2.95509e+06	122457	929027	898606	2.96191e+06	5.30238e+06	2.55599e+06	4.22664e+06	6.29352e+06	2.6389e+06	2.90521e+06	2.92241e+06	2.92225e+06
M577T270	[M-H]-	Vitexin-2''-o-rhamnoside	1.62879	0.106566	0.00441119	577.154	270.092		C12628	Phenylpropanoids and polyketides	Flavonoids	Flavonoid glycosides	14818.5	73725.9	142387	97435.5	98554.9	36921.5	5110.63	5350.44	6213.27	7610.04	13140.4	12004.9	33196.5	33609.9	33267.4
M183T124	(M+K-2H)-	L-Glutamine	6.18832	0.221281	0.00501474	183.016	124.357	HMDB0000641	C00064	Organic acids and derivatives	Carboxylic acids and derivatives	"Amino acids, peptides, and analogues"	1.65628e+06	632645	361795	607602	1.18742e+06	1.42179e+06	168671	209193	168900	164810	321514	265284	576878	576874	583818
M617T231	[M-H]-	7-ethyl-10-(4-n-aminopentanoic acid)-1-piperidino)carbonyloxycamptothecin	2.90861	3.66959	0.00595957	617.273	230.661	HMDB0060661					79099.1	73524.3	169833	18943.7	63632.6	47466.2	239516	199687	211240	268992	541302	199747	133761	134556	134555
M163T153	[M-H]-	D-quinovose	1.32986	0.399491	0.00722847	163.06	152.638		C02522	Organic oxygen compounds	Organooxygen compounds	Carbohydrates and carbohydrate conjugates	44962.3	51668.5	64047	56039.8	124083	85857.7	31369.6	21145	21041.7	26671.4	46755.7	23462.9	48690.2	49490.9	48690.1
M476T188	[M]-	1-(9z,12z-octadecadienoyl)-2-hydroxy-sn-glycero-3-phosphoethanolamine	10.6842	1.88952	0.00785853	476.277	187.881			Lipids and lipid-like molecules	Fatty Acyls	Lineolic acids and derivatives	3.83695e+06	1.74527e+06	4.88374e+06	281563	4.24579e+06	2.76517e+06	5.05038e+06	6.62217e+06	4.18475e+06	5.33164e+06	6.02557e+06	6.34042e+06	4.72474e+06	4.76282e+06	4.72485e+06
M165T350	[M-H]-	D-arabinonic acid	1.05521	0.453224	0.00908525	165.04	349.96	HMDB0000539	C00878	Organic oxygen compounds	Organooxygen compounds	Carbohydrates and carbohydrate conjugates	49443.9	82169.8	37696.6	24034.4	52353.5	46449.7	23974.7	18941.2	21379.9	16232.2	18980.6	32899.7	31734.5	29080.4	29596.4
M147T386_2	[M-H]-	(S)-2-Hydroxyglutarate	2.19433	1.59944	0.0107061	147.03	385.917	HMDB0000694	C03196	Organic acids and derivatives	Hydroxy acids and derivatives	Short-chain hydroxy acids and derivatives	250372	171359	236308	116297	151931	251196	368783	388931	231538	224310	362607	307113	243427	247725	243357
M263T106	[M-H]-	(+)-abscisic acid	1.1973	0.357096	0.0107796	263.128	106.098		C06082	Lipids and lipid-like molecules	Prenol lipids	Sesquiterpenoids	60499.2	103165	41462.8	32098.6	73517.8	33780.9	15943	35167.4	11862.1	25779.1	19301.5	14975.3	32229.3	28281.9	32214.5
M441T27	[M-H]-	6,8-dihydroxy-2,2,4,4-tetramethyl-7-(3-methylbutanoyl)-9-(2-methylpropyl)-9h-xanthene-1,3-dione	1.2097	0.241958	0.010814	441.25	27.14			Organoheterocyclic compounds	Benzopyrans	1-benzopyrans	23615.2	72952.6	42896.7	81384.1	30700.4	18825.8	4668.77	10355.1	4865.42	14169.5	15341.4	16019	29560.5	29558	29060.4
M515T34	[M-H]-	Cynarin	7.30553	0.127128	0.0110272	515.121	34.288	HMDB0030093	C10445	Organic oxygen compounds	Organooxygen compounds	Alcohols and polyols	925593	1.68368e+06	435212	3.09814e+06	1.18195e+06	919180	18296	116674	146710	316086	163163	287081	748740	684441	748166
M397T26	[M-H]-	Mitragynine	1.57407	0.201269	0.0122643	397.224	26.38	HMDB0041933	C09226				36818	121436	75812	139261	45652.7	25574.7	5436.09	14561.6	8064.7	21739.8	23271.7	16401.4	47235.3	48281.6	48092.9
M480T166	[M-H]-	1-stearoyl-2-hydroxy-sn-glycero-3-phosphoethanolamine	1.20539	1.86923	0.0135229	480.305	166.157	HMDB0011130		Lipids and lipid-like molecules	Glycerophospholipids	Glycerophosphoethanolamines	63246.7	30678.5	58046	5452.99	54868.6	34167.5	78757.4	79933.3	54348.9	54053.9	101389	92208.3	60907.2	60788.5	52094.2
M441T155	[M+Cl]-	7-keto-3.alpha.,12-.alpha.-dihydroxycholanic acid	1.28659	2.48819	0.0148695	441.25	154.523			Lipids and lipid-like molecules	Steroids and steroid derivatives	Bile acids, alcohols and derivatives	8443.48	27422.8	71170	12281	9293.22	9086.1	41268.4	59093.7	41960.3	58160.6	62869.8	79262	48945.6	48957.6	51133.9
M136T97	[M-H]-	Anthranilic acid (Vitamin L1)	1.99281	2.37551	0.0167816	136.04	97.105	HMDB0001123	C00108	Benzenoids	Benzene and substituted derivatives	Benzoic acids and derivatives	64344.1	67953.9	104924	50986.5	78253.1	119095	156582	69520.8	112407	260053	282580	272299	116696	118358	116696
M169T31	[M-H]-	Phloroglucinolcarboxylic acid	1.09256	0.275486	0.0174679	169.013	30.897	HMDB0029649		Benzenoids	Benzene and substituted derivatives	Benzoic acids and derivatives	58395.1	15042.6	14200.4	14627.8	47402	46117.2	4312.41	12209	9858.15	10908.1	7864.03	8784.44	17535.4	18707.4	17537.5
M167T166	[M-H]-	Vanillic acid	1.15278	0.402539	0.0191722	167.034	165.867	HMDB0000484	C06672	Benzenoids	Benzene and substituted derivatives	Benzoic acids and derivatives	69203	17950	40892.1	17133.9	65178	56823.7	18401.8	17043.5	14874.8	14437.8	17653.3	25139.3	29084.1	29083	29613.1
M133T198	(M-H2O-H)-	Ribitol	1.00335	0.280329	0.0201566	133.05	198.35	HMDB0000508	C00474	Organic oxygen compounds	Organooxygen compounds	Carbohydrates and carbohydrate conjugates	16065.7	59710.5	27551.7	55783.1	19610.4	19814.8	6851.22	3873.06	3790.27	7018.8	8663.71	25458.4	19059.4	19059.3	18988
M195T73	[M-H]-	1-(4-hydroxy-3,5-dimethoxyphenyl)ethanone	1.45998	0.272473	0.0202341	195.065	73.319		C10664	Organic oxygen compounds	Organooxygen compounds	Carbonyl compounds	100845	27259.9	32051.5	38153.9	122700	54332.7	9422.99	14628.7	11518	19979.8	29262.2	17459.1	38908.9	39437.2	39434.8
M189T354	[M-H]-	(-)-hydroxycitric acid lactone	1.22801	0.237717	0.0208017	189.004	353.839			Organic acids and derivatives	Carboxylic acids and derivatives	Tricarboxylic acids and derivatives	38488.7	73673.4	39454.4	94921.1	28350.5	12254.7	3753.54	2506.2	2876.18	31282.9	11865.4	15974.5	30705.8	30709.5	29624.2
M441T44_2	[M-H]-	.alpha.-apooxytetracycline	1.04464	0.140143	0.0220167	441.12	43.809						17533	69517.2	16325	53383.2	21735.6	9048.06	4613.92	5104.48	5337.96	3171.7	2664.33	5390.4	15862.1	15852.3	16667.5
M87T127	[M-H]-	Pyruvate	1.35943	0.366171	0.0228609	87.0084	127.284	HMDB0000243	C00022	Organic acids and derivatives	Keto acids and derivatives	Alpha-keto acids and derivatives	44230.4	109454	112918	135246	76103.1	13357.1	21187.9	20337.9	25536.6	42336.1	41808.9	28695.3	57059.1	52739.3	52818.7
M163T165	[M-H]-	P-coumaric acid	1.52075	2.39473	0.0230624	163.039	165.015	HMDB0002035	C00811	Phenylpropanoids and polyketides	Cinnamic acids and derivatives	Hydroxycinnamic acids and derivatives	48219.3	32569.8	50416.7	28553.8	33591.1	30487.1	128161	162000	81313.5	71818.5	46784.1	45952.9	68314.4	67138.8	68343
M381T25	[M-H-HF]-	5-heptenoic acid, 7-[(1r,2r,3s,5s)-2-[(1e,3s)-3-(2,3-dihydro-1h-inden-2-yl)-3-hydroxy-1-propen-1-yl]-3-fluoro-5-hydroxycyclopentyl]-, (5z)-	1.22323	0.268764	0.0234916	381.23	25.24			Lipids and lipid-like molecules	Fatty Acyls	Fatty acids and conjugates	25676.2	87679.2	42736.5	93300.4	31808.7	16346.9	6552.44	15302.9	8633.55	20797.6	15468.2	13215.6	31878.4	31879.2	30977
M193T185	[M-H]-	Aminohippuric acid	1.86753	0.091511	0.0238015	193.061	185.079	HMDB0001867	D06890	Benzenoids	Benzene and substituted derivatives	Benzoic acids and derivatives	126168	75471.6	39897.5	12706.6	52649.6	210922	14863.5	9882.63	7063.88	4272.07	4598.17	6705.54	40746.4	41206.8	40749.2
M681T53	[M-H]-	Haploside d	1.18077	0.212403	0.0242377	681.184	53.2385			Phenylpropanoids and polyketides	Flavonoids	Flavonoid glycosides	13971.5	81988	31838.8	75587.5	20654	24628	1315.76	7725.31	3275.45	15047.1	9867.73	15586.3	46172.4	39263.4	46200.2
M293T25	[M-H]-	Cinchonine	2.74498	0.268173	0.0244077	293.178	25.062	HMDB0030282	C06528				108777	434148	266491	479927	139231	89471.4	35846.4	67589.3	57635.6	81449.2	82310.7	82267.3	167471	171722	171699
M92T97	[M-H]-	Alanine-2,3,3,3-d4	1.42601	2.47628	0.0245643	92.0501	97.466			Organic acids and derivatives	Carboxylic acids and derivatives	Amino acids, peptides, and analogues	31660.8	25049.7	58071.3	21253.9	34743.5	68334.4	62903.1	37695	57449.5	144547	145994	143523	51742.7	45145.1	51755.8
M179T290	[M-H]-	D-fructose	5.8059	0.360914	0.0249272	179.056	289.946	HMDB0062538	C00095	Organic oxygen compounds	Organooxygen compounds	Carbohydrates and carbohydrate conjugates	914275	2.02606e+06	775154	2.38003e+06	782808	691094	588290	471187	274432	390561	524763	482675	893782	907682	913762
M437T196	[M-H]-	1-stearoyl-2-hydroxy-sn-glycero-3-phosphate	1.195	3.09793	0.0259347	437.263	196.279			Lipids and lipid-like molecules	Glycerophospholipids	Glycerophosphates	856.277	14861.6	57019.7	15820	2007.5	1341.15	26906.8	36489.6	34510.8	67708.4	39482.2	79621.2	23255	23471.6	23255.6
M176T195	(M-H)-	N-Formylmethionine	1.46101	0.44616	0.0259687	176.035	194.784	HMDB0001015	C03145	Organic acids and derivatives	Carboxylic acids and derivatives	"Amino acids, peptides, and analogues"	86946.2	50910.4	30744.1	77356.1	106431	140380	37796.7	32524.4	30432.7	17902.8	68736.3	32460	71815.8	87407.5	87486.7
M153T70	[M-H]-	Gentisic acid	5.12127	0.196539	0.0291953	153.019	69.7195	HMDB0000152	C00628	Benzenoids	Benzene and substituted derivatives	Benzoic acids and derivatives	1.17706e+06	138767	422259	75733.4	1.09237e+06	914884	59842.8	90923	66617.1	166261	258618	108728	384087	367159	383929
M309T25	[M-H]-	Mestranol	2.49743	0.181253	0.0315672	309.173	25.143	HMDB0015446	C07618	Lipids and lipid-like molecules	Steroids and steroid derivatives	Estrane steroids	60216.7	342826	207355	402024	86037.6	47359.6	14946.3	37440.2	20349.6	49558.2	42294.4	43094.2	105936	106928	106660
M161T366	[M-H]-	3-hydroxy-3-methylglutaric acid	1.15114	0.596174	0.0322183	161.046	366.326	HMDB0000355	C03761	Lipids and lipid-like molecules	Fatty Acyls	Fatty acids and conjugates	75698.9	59559.1	74705.6	116776	155673	81730.1	68087.9	46865.6	51238.2	53071.5	71931.9	45132	73380.5	74188.3	73389.1
M259T466	[M-H]-	D-glucose 6-phosphate	1.4978	1.79229	0.0337244	259.022	465.87		C00092	Organic oxygen compounds	Organooxygen compounds	Carbohydrates and carbohydrate conjugates	154422	86798.7	98693.4	56507.4	67376.1	133477	113686	259681	90683.9	188872	168786	248783	178436	181048	179212
M565T437	[M-H]-	Udp-galactose	1.19875	0.595079	0.0357689	565.047	437.063	HMDB0000302	C00052	Nucleosides, nucleotides, and analogues	Pyrimidine nucleotides	Pyrimidine nucleotide sugars	101558	40224.9	53573.3	48322.1	95866.5	78497.7	45166.1	29778	28691.5	37051.7	49081.4	58999.6	52601.4	53536.2	52604.8
M356T156	[M-H]-	Hmboa + o-hex	1.58869	0.240404	0.0360186	356.097	156.424	HMDB0037263		Organic oxygen compounds	Organooxygen compounds	Carbohydrates and carbohydrate conjugates	68209.3	38316.9	57998.8	33018.7	74416.5	189490	11935.3	8375.84	3548.6	27292.5	19012.3	40769.9	43317	43317	43107.1
M193T151	[M-H]-	Trans-ferulic acid	1.70488	0.532839	0.039197	193.05	150.678	HMDB0000954	C01494	Phenylpropanoids and polyketides	Cinnamic acids and derivatives	Hydroxycinnamic acids and derivatives	67839	244384	85431.3	192628	160078	147502	47896.8	74927.6	43184.5	110926	107652	93829.5	103410	104187	103417
M227T287	[M-H]-	Traumatic Acid	1.45837	0.16185	0.0394949	227.128	287.492	HMDB0000933	C16308	Lipids and lipid-like molecules	Fatty Acyls	Fatty acids and conjugates	20166.2	162628	68949.9	98700.3	26181.1	19196.4	11784.9	6820.16	4554.33	14860.6	13059.6	12984.2	40719.2	41068.1	40208.9
M153T234	[M-H]-	2,3-dihydroxybenzoic acid	3.39644	0.10763	0.0401146	153.019	234.155	HMDB0000397	C00196	Benzenoids	Benzene and substituted derivatives	Benzoic acids and derivatives	626486	72155.5	87791.1	24048.5	442769	315622	6075.51	20716.2	316.065	43321.5	50946.9	47481.5	162604	160884	109575
M337T25	[M-H-C2H6O4]-	Eplerenone hydroxy acid	1.25523	0.308529	0.0403179	337.204	24.906						30393.9	99781.2	71146.1	114140	29148.4	10756.9	9268.82	22025.2	12462.3	24301.8	22992.1	18590.8	43404.1	42229.3	42216.5
M313T105	[M-H]-	Progesterone	1.56359	2.0754	0.0406742	313.237	104.581	HMDB0001830	C00410	Lipids and lipid-like molecules	Steroids and steroid derivatives	Pregnane steroids	40067.1	26661.7	129993	15360.2	38458	77196.9	106788	166528	99896.5	100621	159497	46853.6	68796.1	70686.8	68798.5
M149T149	[M-H]-	D-ribose	1.31145	0.340714	0.0425918	149.045	149.459	HMDB0000283	C00121	Organic oxygen compounds	Organooxygen compounds	Carbohydrates and carbohydrate conjugates	43770.1	106904	57717.5	129850	17404.5	34077.7	15735.7	22245.7	20449.5	23226.7	10661.8	40465	58327	62780.2	58426.5
M287T50	[M-H]-	Eriodictyol	1.26874	0.0673452	0.0432728	287.055	49.952	HMDB0005810	C05631	Phenylpropanoids and polyketides	Flavonoids	Flavans	8362.88	90185.2	21258.4	101712	19645.1	13395.8	2113.96	1488.94	1807.65	2145.61	5551.7	4035.48	20310	19865.8	20308.2
M239T296	(M+CH3COO)-	D-Mannose	2.14366	0.380971	0.0446777	239.076	296.418	HMDB0000169	C00159	Organic oxygen compounds	Organooxygen compounds	Carbohydrates and carbohydrate conjugates	141034	373811	95547.4	293974	92772.8	107487	98596.8	92964.6	53852.6	53135.4	60452.8	61828	121432	122147	120709
M739T141	[M-H]-	Pe(16:1e/15-hete)	1.86711	0.601675	0.0477132	738.506	141.066			Lipids and lipid-like molecules	Glycerophospholipids	Glycerophosphoethanolamines	241481	208649	150028	123375	235088	329277	102446	79884.6	231266	112735	89673	158893	161359	161360	163708
M241T46_2	(M-H)-	Pentadecanoic Acid	1.64592	1.70383	0.0483038	241.216	46.0455	HMDB0000826	C16537	Lipids and lipid-like molecules	Fatty Acyls	Fatty acids and conjugates	181174	98899.3	113073	70612	59263.1	163243	150904	308910	183879	134722	257619	133245	151717	141837	151780
M179T382	(M-H)-	myo-Inositol	1.87009	0.263435	0.0523653	179.056	382.476	HMDB0000211	C00137				38392.2	197737	96714.2	276805	74587.3	33727.2	23576.7	23459.2	15803.7	43083.7	35992.1	47221.5	72358.8	73658.5	72354.6
M265T25	[M-H]-	Zinniol	4.26324	0.165162	0.0543308	265.147	25.1		C10840	Benzenoids	Benzene and substituted derivatives	Benzyl alcohols	112793	1.03921e+06	639119	1.31064e+06	169616	89676.4	38768.4	76989.2	53969.7	138254	132557	114580	313819	313805	315409
M341T388	[M-H]-	Trehalose	2.17419	0.601921	0.0553662	341.109	388.152	HMDB0000975	C01083	Organic oxygen compounds	Organooxygen compounds	Carbohydrates and carbohydrate conjugates	330792	512921	484866	471643	369897	234374	286700	334558	461537	131508	86684.9	146327	311336	315908	310417
M158T64	[M-H-CH2O2]-	Indolelactic acid	1.86774	0.636377	0.0555294	158.06	64.096	HMDB0000671	C02043	Organoheterocyclic compounds	Indoles and derivatives	Indolyl carboxylic acids and derivatives	263420	130326	176155	125149	281166	199506	119686	60551	92104.9	175668	180364	119828	129207	131909	129120
M316T227	[M-H]-	Trp-Leu	1.01765	2.19182	0.0557277	316.186	226.722			Organic acids and derivatives	Carboxylic acids and derivatives	Amino acids, peptides, and analogues	1417.41	42499.4	45133.4	25378.1	2580.44	1472.52	35226.4	41264.2	23735	72422.7	36835.9	50205.4	31902.4	32500.6	31903.1
M165T74	[M-H]-	3-(4-hydroxyphenyl)propionic acid	1.33287	0.380354	0.05644	165.055	73.554	HMDB0002199	C01744				83354.9	38788.4	54000.1	48707.7	176688	49325.3	22374.2	34435.6	23945.7	25755.2	45530.6	19446.7	57116.5	64169.9	57145.7
M555T153	[2M-H]-	2,5,7,8-tetramethyl-2-(.beta.-carboxyethyl)-6-hydroxychroman	2.13907	0.16678	0.0584718	555.282	153.261			Organoheterocyclic compounds	Benzopyrans	1-benzopyrans	31028.9	332718	258509	206201	30808.2	16063.9	4084.88	8162.79	8345.8	45302.6	19782	60309.8	79760.1	78365.2	79709.3
M337T155	[M-H]-	Coumaroyl quinic acid (isomer of 758, 760)	1.83313	0.198693	0.0619752	337.091	155.174			Organic oxygen compounds	Organooxygen compounds	Alcohols and polyols	28689.2	311365	27834.7	149927	94192.7	74925.6	24615.2	34527.2	9465.52	25851.7	22208.9	19820.4	77850.6	93972	77452.4
M117T381_2	[M-H]-	Methylmalonic acid	2.38204	0.815728	0.0646295	117.02	380.914	HMDB0000202	C02170	Organic acids and derivatives	Carboxylic acids and derivatives	Dicarboxylic acids and derivatives	738924	504755	537294	402904	646428	578824	501611	400071	434522	454979	506463	483276	495554	504769	495488
M179T214	[M-H]-	Caffeic Acid	1.94154	0.545685	0.0667143	179.034	213.708	HMDB0003501	C01481	Phenylpropanoids and polyketides	Cinnamic acids and derivatives	Hydroxycinnamic acids and derivatives	151166	97882.6	117242	115313	244409	216339	42562.4	37546.5	17212.9	134804	159472	122629	107055	109423	107030
M277T185	[M-H-C11H10O4]-	2-despiperidyl-2-(5-carboxypentylamine)repaglinide	4.88847	13.6323	0.06674	277.216	184.805			Organic acids and derivatives	Carboxylic acids and derivatives	Amino acids, peptides, and analogues	47058.3	110388	80748.5	69576.2	47225.7	46330.6	72477.3	1.47339e+06	33769	2.39744e+06	1.45662e+06	37335.7	69197	63184.1	70141.9
M283T43	[M-H]-	Octadecanoic acid	7.62032	1.63601	0.0679349	283.264	42.808	HMDB0000827	C01530	Lipids and lipid-like molecules	Fatty Acyls	Fatty acids and conjugates	3.26771e+06	1.2902e+06	3.58094e+06	1.47459e+06	2.90284e+06	3.19433e+06	4.3843e+06	7.35897e+06	3.12115e+06	4.95188e+06	3.24175e+06	2.64459e+06	2.90265e+06	2.74271e+06	2.90016e+06
M353T248	[M-H]-	Neochlorogenic acid	2.90148	0.201791	0.0687993	353.086	248.053		C17147	Organic oxygen compounds	Organooxygen compounds	Alcohols and polyols	25255.1	564331	152098	571509	122851	113176	16186.6	13245.6	11529.4	82805.3	73393.9	115457	143731	133614	133656
M401T388	[M+FA-H]-	Gentiopicroside	2.15143	0.593315	0.0694763	401.13	388.169			Organic oxygen compounds	Organooxygen compounds	Carbohydrates and carbohydrate conjugates	332198	555003	484310	455742	383040	185216	292704	328347	454220	127958	71168	146894	314912	317240	317276
M195T350	(M-H)-	Galactonic acid	1.84927	0.500517	0.0724343	195.051	350.059	HMDB0000565	C00880	Organic acids and derivatives	Hydroxy acids and derivatives	Medium-chain hydroxy acids and derivatives	217695	55586.2	98978	56091.6	236838	144732	65762.9	45667.3	51913.9	51403.4	86242.7	104389	97035.3	97013.4	96103.3
M597T231	[M-H]-	Phe-met-arg-phe-amide	1.07526	2.09198	0.0728119	597.303	231.321			Organic acids and derivatives	Carboxylic acids and derivatives	Amino acids, peptides, and analogues	58771.2	11876.3	51134.1	5987.12	29595.4	57601.8	60788.1	100421	25462.8	63171.3	144666	55194.6	51776.5	49812.3	49868.2
M166T45	[M-H]-	Pyridoxal	1.50054	0.181643	0.0728874	166.05	44.7665	HMDB0001545	C00250	Organoheterocyclic compounds	Pyridines and derivatives	Pyridine carboxaldehydes	16859.6	202685	50499.7	113070	19472.4	34831.8	9484.97	6329.6	13653	9281.21	21688.8	19016.3	55638.7	55757.5	61083.3
M137T172	[M-H]-	4-hydroxybenzoate	1.03395	0.535271	0.0733078	137.024	172.258	HMDB0000500	C00156	Benzenoids	Benzene and substituted derivatives	Benzoic acids and derivatives	88879.3	28340.6	22920.7	28023.7	67125.9	47992.7	30408.3	23614.8	28247.7	31631.5	19141.4	18589.3	30919	31475	30743.3
M251T124	[M-H]-	Cimetidine	1.61239	0.519121	0.0746489	251.018	124.215	HMDB0014644	C06952	Organoheterocyclic compounds	Azoles	Imidazoles	174474	44727.1	65337.6	38761	128636	151141	42319.4	54247.7	44277.2	40627.5	70638.1	60959.8	91445.9	91385.9	91616.1
M606T424	[M-H]-	Udp-n-acetylglucosamine	1.89164	1.31223	0.0753673	606.074	424.335	HMDB0000290	C00043	Nucleosides, nucleotides, and analogues	Pyrimidine nucleotides	Pyrimidine nucleotide sugars	372561	194145	330454	171878	310943	290106	428925	356674	273810	282822	426372	422939	322300	324583	328238
M188T178	[M-H]-	Kynurenic acid	1.48257	0.51677	0.0805527	188.034	178.401	HMDB0000715	C01717	Organoheterocyclic compounds	Quinolines and derivatives	Quinoline carboxylic acids	92988.4	52262.6	67922	38040.5	129741	191295	46051.2	43990.7	38334.1	62334.3	41865.5	63145.6	67644.9	67797.2	67368.3
M293T57	[M-H-H2O]-	13s-hydroperoxy-9z,11e-octadecadienoic acid	9.27833	1.7422	0.0836683	293.212	57.298		C04717	Lipids and lipid-like molecules	Fatty Acyls	Lineolic acids and derivatives	788827	4.50789e+06	5.43573e+06	2.86565e+06	841878	1.04835e+06	4.3184e+06	5.28079e+06	2.18692e+06	4.88316e+06	6.23152e+06	4.08298e+06	3.72079e+06	3.76503e+06	3.72114e+06
M439T190	[M-H]-	Desmethylverapamil	1.42509	2.43622	0.0869437	439.279	190.059			Benzenoids	Benzene and substituted derivatives	Phenylbutylamines	1797.57	38785.3	124016	13879.7	6382.56	3377.54	52672.1	81663.6	68593.8	28652	113060	113949	55429.6	58028.8	57935.5
M712T37	[M-H]-	Pe 34:3	3.91745	0.240461	0.0945604	712.491	36.952			Lipids and lipid-like molecules	Glycerophospholipids	Glycerophosphoethanolamines	166896	1.14226e+06	165870	1.16559e+06	202300	169824	135411	79909.6	162957	112258	110598	123314	409723	412168	417276
M146T388_2	[M-H]-	Glutamic acid	2.16712	1.30871	0.0949283	146.046	387.936	HMDB0000148	C00025	Organic acids and derivatives	Carboxylic acids and derivatives	Amino acids, peptides, and analogues	576784	502894	554164	247219	405759	606847	619081	588840	409698	607714	844167	717465	530857	538101	538192
M177T85	[M-H]-	D-glucono-1,5-lactone	1.09048	0.274059	0.0981517	177.039	84.932	HMDB0000150	C00198	Organic oxygen compounds	Organooxygen compounds	Carbohydrates and carbohydrate conjugates	11306.5	88743.9	20812	94550.7	14375	14289.7	9426	11344	10551.1	11567	12891.5	11112.2	18808.2	19344.3	19347.3
M131T131	[M-H]-	Hydroxyisocaproic acid	1.20813	3.07741	0.0991146	131.071	131.347	HMDB0000665	C03264	Lipids and lipid-like molecules	Fatty Acyls	Fatty acids and conjugates	21759.8	23174.3	35453.8	18050.1	23531.4	14349.8	31183.8	26614.8	14338.7	184983	83146.1	79242.8	56724.4	56610.5	51631.6
M795T380	[M+HCO2]-	.alpha.-hederin	0.17085	1.76961	0.0252166	795.435	379.524		C08954	Lipids and lipid-like molecules	Prenol lipids	Triterpenoids	576.481	1126.63	782.49	1518.43	974.882	114.964	1513.51	2038.87	1095.99	1346.36	1839.32	1180.13	1122.74	1123.47	1097.95
M421T482	[M-H]-	.alpha.,.alpha.'-trehalose 6-phosphate	0.234248	0.883958	0.601322	421.073	481.786	HMDB0001124	C00689	Organic oxygen compounds	Organooxygen compounds	Carbohydrates and carbohydrate conjugates	5591.93	2298.98	3169.64	2028.01	5564.23	7072.52	3703.91	3632.32	2520.61	3260.52	5038.98	4583.76	3728.86	3891.42	3729.26
M359T189	[2M-H]-	.beta.-d-allose	0.406811	0.215358	0.0799813	359.133	189.395			Organic oxygen compounds	Organooxygen compounds	Carbohydrates and carbohydrate conjugates	1285.12	9018.41	1269.44	13578.6	2945.39	2664.27	1118.08	849.098	452.613	1147.71	1443.44	1613.72	3939.94	3590.83	3948.62
M343T424	[2M-H]-	.beta.-glycerophosphate	2.51306	0.937881	0.6432	343.02	423.616	HMDB0002520	C02979	Lipids and lipid-like molecules	Glycerophospholipids	Glycerophosphates	1.06683e+06	629765	865039	419572	822282	887548	768931	621451	682659	639233	895376	791981	729527	735995	736101
M662T426	[M-H]-	.beta.-nicotinamide adenine dinucleotide(NAD)	0.428923	1.3038	0.0865553	662.101	425.799	HMDB0000902	C00003				17370.1	13145.8	15608.4	4186.41	17868.7	15405.5	19751.1	18495.9	16824.4	15402.6	17454.2	21050	16588.5	16680.5	16681.7
M277T44	[M-H]-	.gamma.-linolenic acid	16.2273	0.970721	0.893393	277.218	44.117	HMDB0003073	C06426	Lipids and lipid-like molecules	Fatty Acyls	Lineolic acids and derivatives	2.38151e+07	6.20482e+07	9.36673e+07	6.38218e+07	4.31551e+07	4.39445e+07	2.77566e+07	5.8345e+07	4.04138e+07	6.9439e+07	6.20042e+07	6.28182e+07	6.52648e+07	6.63068e+07	6.52599e+07
M403T51	(M+CH3COO)-	(-)-Usnic acid	0.261915	0.919604	0.797526	403.101	50.688						31654.1	26784	44771.3	40710.9	24636.6	23089.8	25645.3	70898.7	23841.4	33464	9940.83	12448.9	28074.5	28074.4	27907.2
M327T156	[M-H]-	(10e,15z)-9,12,13-trihydroxyoctadeca-10,15-dienoic acid	1.85186	0.720896	0.504594	327.216	156.352	HMDB0035919		Lipids and lipid-like molecules	Fatty Acyls	Lineolic acids and derivatives	68062.5	567734	269232	562872	95352	72578.1	137120	143966	121761	132880	445576	197961	151119	152594	151074
M375T460	[M-H]-	(1s,4as,7s,7as)-7-hydroxy-7-methyl-1-[(2s,3r,4s,5s,6r)-3,4,5-trihydroxy-6-(hydroxymethyl)oxan-2-yl]oxy-4a,5,6,7a-tetrahydro-1h-cyclopenta[c]pyran-4-carboxylic acid	0.0392345	0.966767	0.829124	375.114	460.164			Lipids and lipid-like molecules	Prenol lipids	Terpene glycosides	877.18	1604.46	1442.6	1041.77	881.397	666.235	1181.25	1049.02	736.573	1179.85	1109.52	1040.96	1076.75	1096.16	1103.86
M734T172_1	[M+Hac-H]-	(2-{[3-hydroxy-2-tetradecanamidooctadec-4-en-1-yl phosphonato]oxy}ethyl)trimethylazanium	0.844117	2.0418	0.000132106	733.548	172.309	HMDB0012097		Lipids and lipid-like molecules	Sphingolipids	Phosphosphingolipids	12849.9	11808.1	18302.6	12712.2	26614.7	14399.5	25388.7	33645.7	36273.7	35017.9	34646.9	32442.6	22223.2	22536.3	22941.9
M425T26	[M-H]-	(2e,6e,10e)-13-[(2r)-6-hydroxy-2,8-dimethyl-3,4-dihydrochromen-2-yl]-2,6,10-trimethyltrideca-2,6,10-trienoic acid	0.979529	0.270542	0.00412223	425.256	26.166			Lipids and lipid-like molecules	Prenol lipids	Quinone and hydroquinone lipids	21140.8	41506.1	27975.3	51874.2	24947.1	13278.1	3506.21	10588	4456	12390.2	8882.33	9069.98	21769.3	22800.6	21767.6
M488T176	[M-H]-	(2e,6e,11e,13e)-18-(2,6-dioxopiperidin-4-yl)-9-hydroxy-8-methoxy-10,12,14-trimethyl-15-oxooctadeca-2,6,11,13-tetraenoic acid	0.208049	0.376344	0.282095	488.24	176.327			Lipids and lipid-like molecules	Fatty Acyls	Lineolic acids and derivatives	80.7674	5664.31	855.819	3736.39	201.975	92.342	1017.91	547.024	778.24	485.792	863.698	308.476	1571.97	1575.64	1680.64
M506T308	[M-H]-	(2e,6e,12e)-18-(2,6-dioxopiperidin-4-yl)-9,11-dihydroxy-8-methoxy-10,12,14-trimethyl-15-oxooctadeca-2,6,12-trienoic acid	0.157609	1.43821	0.130623	506.271	308.49			Lipids and lipid-like molecules	Fatty Acyls	Lineolic acids and derivatives	436.295	1791.88	1820.29	1539.02	395.777	629.988	1603.47	1844.95	1247.97	1764.8	1602.62	1447.4	1274.65	1323.1	1323.6
M415T419	[M-H]-	(2r,3s,4s,5r,6r)-2-[[(2s,3r,4r)-3,4-dihydroxy-4-(hydroxymethyl)oxolan-2-yl]oxymethyl]-6-(2-phenylethoxy)oxane-3,4,5-triol	4.0836	0.206389	0.173759	415.145	418.769			Organic oxygen compounds	Organooxygen compounds	Carbohydrates and carbohydrate conjugates	6117.31	1.27172e+06	306868	1.44606e+06	12692.1	9615.98	47242.5	43387.9	36974	232199	105099	165218	301679	305132	301703
M525T22	[M+FA-H]-	(2s,3r,5r,10r,13r,14s,17s)-2,3,14-trihydroxy-10,13-dimethyl-17-[(2r,3r)-2,3,6-trihydroxy-6-methylheptan-2-yl]-2,3,4,5,9,11,12,15,16,17-decahydro-1h-cyclopenta[a]phenanthren-6-one	0.210268	1.45516	0.0120793	525.287	22.082			Lipids and lipid-like molecules	Steroids and steroid derivatives	Bile acids, alcohols and derivatives	1639.9	3005.56	2554.5	2285.31	2086.43	1683.35	3192.65	3412.15	3780.76	2173.39	2929.37	3799.96	2629.78	2602.71	2618.34
M941T32	[M-H]-	(2s,3s,4r,5r,6r)-6-[[(3r,6ar,6bs,8r,8ar,14br)-8-hydroxy-4,4,6a,6b,11,11,14b-heptamethyl-8a-[(2s,3r,4s,5s,6r)-3,4,5-trihydroxy-6-(hydroxymethyl)oxan-2-yl]oxycarbonyl-1,2,3,4a,5,6,7,8,9,10,12,12a,14,14a-tetradecahydropicen-3-yl]oxy]-4,5-dihydroxy-3-[(2s,3r,4s,5r)-3,4,5-trihydroxyoxan-2-yl]oxyoxane-2-carboxylic acid	0.665772	0.438734	0.241817	941.483	31.695			Lipids and lipid-like molecules	Prenol lipids	Terpene glycosides	2610.78	34987.4	26279.9	46691.2	2682.39	925.301	2468.77	3594.06	1814.22	19831.1	7583.96	14801.2	17602	17699.2	17602.2
M500T341	[M-H]-	(2s)-2-[(2r,3s,7r,8r,8as)-2,3,4'-trihydroxy-4,4,7,8a-tetramethyl-6'-oxospiro[2,3,4a,5,6,7-hexahydro-1h-naphthalene-8,2'-3,8-dihydrofuro[2,3-e]isoindole]-7'-yl]-3-methylbutanoic acid	0.469309	2.11089	0.035688	500.27	340.586			Organic acids and derivatives	Carboxylic acids and derivatives	Amino acids, peptides, and analogues	869.83	8447.1	8995.09	4569	845.415	796.044	9836.67	12689.2	5862.72	9026	6995.38	7354.16	6096.28	6116.27	6543.15
M243T194	[M-H]-	(5e)-3,4,9-trihydroxy-2-propyl-2,3,4,7,8,9-hexahydrooxecin-10-one	0.248016	1.48152	0.244732	243.134	194.162						5269.9	1096.8	4625.82	887.358	6483.19	5476.22	4869.6	6998.87	1517.22	10573.5	5745.5	5613.66	3211.81	3905.7	3691.04
M375T70	[M-H]-	(e)-5-[(1s,4ar,8ar)-2-formyl-5,5,8a-trimethyl-1,4,4a,6,7,8-hexahydronaphthalen-1-yl]-3-(acetyloxymethyl)pent-2-enoic acid	0.748585	0.42882	0.0987728	375.2	69.861			Lipids and lipid-like molecules	Prenol lipids	Diterpenoids	5034.29	62392.7	28071.4	48955.5	11088.7	30010.4	25505.8	763.075	12801.9	4172.08	17563.5	18762.5	24572	23864.8	23860.9
M147T287	(M-H)-	(S)-Citramalic acid	0.296965	0.41561	0.000530052	147.03	287.18						2720.88	4481.12	3807.13	4258.78	3659.73	2046.48	1294.42	1170.07	1723.01	1290.12	2038.82	1200.62	2124.08	2124.55	2455.14
M445T37	[M-H]-	(z)-2,6-dimethyl-7-(4-methyl-5-oxooxolan-2-yl)-3-[[3,4,5-trihydroxy-6-(hydroxymethyl)oxan-2-yl]oxymethyl]hept-5-enoic acid	0.76363	1.40908	0.198037	445.185	36.963						37187.4	16880.5	24623.3	14237.2	44889	49805.3	64458.6	29746	64468.1	33282.2	46217.8	26203.1	57627.7	57595.2	56270.1
M789T429	[M-H]-	[(1s,4as,6s,7r,7as)-4-methoxycarbonyl-7-methyl-1-[(2s,3r,4s,5s,6r)-3,4,5-trihydroxy-6-(hydroxymethyl)oxan-2-yl]oxy-1,4a,5,6,7,7a-hexahydrocyclopenta[c]pyran-6-yl] (1s,4as,6s,7r,7as)-6-acetyloxy-7-methyl-1-[(2s,3r,4s,5s,6r)-3,4,5-trihydroxy-6-(hydroxymethyl)oxan-2-yl]oxy-1,4a,5,6,7,7a-hexahydrocyclopenta[c]pyran-4-carboxylate	0.116438	1.65312	0.183291	789.307	429.487			Lipids and lipid-like molecules	Prenol lipids	Terpene glycosides	106.747	1136.6	945.809	429.131	124.317	64.2349	603.163	789.485	459.934	1161.15	796.179	830.123	581.646	624.153	621.598
M587T399	[M-H]-	[(2r,3s,4s,5r,6s)-6-[3,5-dihydroxy-4-[3-(4-hydroxyphenyl)propanoyl]phenoxy]-3,4,5-trihydroxyoxan-2-yl]methyl 3,4,5-trihydroxybenzoate	0.0996174	0.758165	0.0179298	587.123	398.731			Phenylpropanoids and polyketides	Flavonoids	Flavonoid glycosides	812.454	1169.5	1304.2	855.81	952.62	1061.73	800.176	803.404	640.368	829.196	916.343	678.01	880.476	873.754	873.852
M238T106	[M-H-C4H2O3]-	[2,2'-bithiophene]-5-carboxylic acid, 4-[(3-carboxy-1-oxo-2-propen-1-yl)amino]-, 5-methyl ester	0.378736	0.958139	0.904855	238.017	106.369						13929.4	24003.7	18119.9	10569	22866.4	19900.2	2886.08	12096.5	8502.34	23540.5	14609	43174.9	19346.2	20290.3	22354.6
M517T481	[M-H]-	[6-[3,4-dihydroxy-2,5-bis(hydroxymethyl)oxolan-2-yl]oxy-3,4,5-trihydroxyoxan-2-yl]methyl (e)-3-(4-hydroxy-3-methoxyphenyl)prop-2-enoate	0.146976	0.415134	0.00529077	517.139	480.872	HMDB0125608		Phenylpropanoids and polyketides	Cinnamic acids and derivatives	Hydroxycinnamic acids and derivatives	680.873	1384.79	660.552	1152.37	1087.99	458.932	432.902	290.65	253.451	421.778	435.598	417.928	466.437	479.416	479.273
M357T25_2	[M-H]-	[7-(3,4-dihydroxyphenyl)-1-(4-hydroxyphenyl)heptan-3-yl] acetate	0.144055	1.13972	0.365187	357.172	24.748			Phenylpropanoids and polyketides	Diarylheptanoids	Linear diarylheptanoids	8493.82	7677.03	10984.4	10023.3	6384.08	9745.81	6909.81	8137	14178.9	12368.2	8982.84	10179.8	9404.15	9459.38	9404.45
M591T467	[M-H-H2O]-	1-(1,2-dihexanoylphosphatidyl)inositol-5-phosphate	0.483375	0.309227	0.00421157	591.176	467.152			Lipids and lipid-like molecules	Glycerophospholipids	Glycerophosphoinositol phosphates	8317.6	6717.3	4348.88	6138.97	13417.9	5611.39	1480.24	1485.44	932.374	3638.57	3405.93	2834.13	4378.26	4454.99	4458.84
M585T358	[M-H]-	1-(1,2-dioctanoylphosphatidyl)inositol	0.170857	1.19577	0.565379	585.25	358.189			Lipids and lipid-like molecules	Glycerophospholipids	Glycerophosphoinositols	974.767	5698.3	2751.82	2738.76	1178.85	1016.75	2963.76	3493.95	2614	1693.8	3126.95	3277.92	1692.75	1789.06	1697.14
M542T344_2	[M+Cl]-	1-(1z-octadecenyl)-sn-glycero-3-phosphocholine	0.190285	1.46683	0.24211	542.328	344.064	HMDB0013122		Lipids and lipid-like molecules	Glycerophospholipids	Glycerophosphocholines	349.067	2747.3	2958.83	1852	387.199	179.178	2186.42	2199.11	1683.46	2292.58	1774.7	2292.98	1626.56	1777.48	1782.28
M547T252_2	[M-H]-	1-[2,4,6-trihydroxy-3-[7-hydroxy-2-(4-hydroxyphenyl)-3,4-dihydro-2h-chromen-4-yl]phenyl]dodecan-1-one	0.221332	0.501586	0.0953001	547.249	251.726			Phenylpropanoids and polyketides	Flavonoids	Hydroxyflavonoids	963.767	5240.97	2590.57	4674.25	2062.67	1184.21	1572.23	1143.6	1198.6	1310.34	2213.31	946.658	2351.49	2394.57	2359.01
M470T227	[M+C2H3O2]-	1-decanoyl-2-hydroxy-sn-glycero-3-phosphocholine	0.987248	7.85444	0.000297583	470.26	227.254			Lipids and lipid-like molecules	Glycerophospholipids	Glycerophosphocholines	737.267	4088.46	9462.2	2076.3	1548.06	719.442	30695	21186.6	10086.7	24647.7	36711.7	23014	13218.6	13233.3	13287
M176T262	[M-H-H2O]-	1-deoxy-1-(methylamino)-d-galactitol	0.724952	0.175471	0.000465926	176.092	261.572			Organic oxygen compounds	Organooxygen compounds	Carbohydrates and carbohydrate conjugates	20473.8	10550.3	8918	6828.55	14894.1	15978.3	2948.42	1598.12	1986.44	2687.11	2987.25	1416.78	6500.77	6401.6	6387.81
M409T236	[M-H]-	1-hexadecanoyl-2-sn-glycero-3-phosphate	0.491796	0.544558	0.280191	409.234	235.584			Lipids and lipid-like molecules	Glycerophospholipids	Glycerophosphates	2369.3	24220	16959.7	28730.7	2727.24	1716.04	3986.03	7355.3	2499.48	9318.44	9819.32	8801.57	9841.55	9994.38	9993.94
M296T217	(M-H)-	1-methylguanosine	0.217015	1.36528	0.0046044	296.099	217.333	HMDB0001563		Nucleosides, nucleotides, and analogues	Purine nucleosides		3260.75	2995.12	3101.07	3007.69	3741.99	3395.98	4102.45	5775.26	4373.06	3655.27	3993.85	4726.59	3878.47	3877.58	3809.2
M187T450	(M+Na-2H)-	1-Methylxanthine	0.173921	0.925369	0.580138	187.024	450.151	HMDB0010738	C16358	Organoheterocyclic compounds	Imidazopyrimidines	Purines and purine derivatives	5312	2522.28	3549.19	2690.68	3424.56	3805.38	3376.54	3781.61	3887.55	2479.78	3345.01	2843.64	2984.36	3036.5	2984.36
M403T31	[M-H]-	1-o-(9z-octadecenyl)-sn-glycero-2,3-cyclic-phosphate	0.190715	1.15577	0.65291	403.261	30.9785						11270.1	46961.6	19200.3	17167.9	32172.4	15631	18982	43769.8	18182.8	21636.3	14728.4	47286.4	46696	46632.5	44690.5
M471T255	[M+HCO2]-	1-o-octyl-2-o-(n-methylcarbamoyl)-sn-glyceryl-3-phosphorylcholine	0.120844	0.937428	0.843131	471.259	255.386			Lipids and lipid-like molecules	Glycerophospholipids	Glycerophosphocholines	1425.39	4052.85	3251.73	2710.18	3188.96	842.168	1709.34	1104.05	783.651	4552.83	2482.72	3870.62	2266.22	2208.18	2267.02
M599T331	[M-H]-	1-octadecanoyl-sn-glycero-3-phospho-(1'-myo-inositol)	0.253231	0.462871	0.271128	599.315	330.615			Lipids and lipid-like molecules	Glycerophospholipids	Glycerophosphoinositols	218.042	6051.43	2840.86	7607.56	330.939	388.837	1540.8	805.313	1160.28	2196.86	1706.21	661.933	1092.55	1092.91	1150.66
M509T26	[M-H]-	1-oleoyl-2-hydroxy-sn-glycero-3-phospho-(1'-rac-glycerol)	5.896	0.502837	0.281511	509.293	26.38			Lipids and lipid-like molecules	Glycerophospholipids	Glycerophosphoglycerols	3.53296e+06	96803.5	846302	47551.3	1.55144e+06	1.59105e+06	276227	483058	86620.9	729348	1.04608e+06	1.23347e+06	1.10915e+06	1.10931e+06	1.11809e+06
M435T230	[M-H]-	1-oleoyl-l-.alpha.-lysophosphatidic acid	0.320369	0.707912	0.506185	435.248	229.885			Lipids and lipid-like molecules	Glycerophospholipids	Glycerophosphates	2191.71	14162.2	5486.35	14198.4	2055.52	1440.72	3173.64	3193.37	1329.03	9278.44	2991.4	8021.35	5503.97	5953.08	5504.24
M478T186	[M-H]-	1-oleoyl-sn-glycero-3-phosphoethanolamine	5.55688	1.421	0.104943	478.292	186.061	HMDB0011506		Lipids and lipid-like molecules	Glycerophospholipids	Glycerophosphoethanolamines	2.70275e+06	1.21838e+06	1.99162e+06	200416	2.28325e+06	1.67248e+06	2.88563e+06	2.11507e+06	2.20124e+06	2.0088e+06	2.90175e+06	2.19539e+06	2.12725e+06	2.1405e+06	2.12728e+06
M431T232	(M+Na-2H)-	1-Palmitoyl Lysophosphatidic Acid	0.744168	1.16088	0.709081	431.218	232.331						19632.9	129704	63901.1	69426.6	17089	12295.2	38208.4	51024.7	24448.4	100392	80267.5	67910	55297	56414.5	55310.5
M817T112	[M+Cl]-	1-palmitoyl-2-arachidonoyl-sn-glycero-3-phosphocholine	0.501652	0.672116	0.042626	816.547	111.709	HMDB0007982		Lipids and lipid-like molecules	Glycerophospholipids	Glycerophosphocholines	20100.2	17342.1	7809.33	20481.3	20017.1	18770.2	10400.6	9150.88	15035.9	6662.74	13146.7	15852.9	13692.9	13672.2	15239.2
M841T165	[M+Cl]-	1-palmitoyl-2-docosahexaenoyl-sn-glycero-3-phosphocholine	0.398289	0.50439	0.17176	840.537	164.669	HMDB0007991		Lipids and lipid-like molecules	Glycerophospholipids	Glycerophosphocholines	6181.24	1976.42	2954.88	1129.28	11168.8	12308.8	2524.55	1780.28	2114.86	3953.28	3958.78	3684.74	5307.97	5309.28	5407.19
M483T37	[M-H]-	1-palmitoyl-2-hydroxy-sn-glycero-3-phospho-(1'-rac-glycerol)	1.37109	0.558361	0.316396	483.269	37.076			Lipids and lipid-like molecules	Glycerophospholipids	Glycerophosphoglycerols	15911.5	221619	176221	154584	23560.6	12876	6283.73	51752.5	12080.3	104984	56109.5	106471	67715.4	73917.5	67558.9
M447T368	[M-H]-	1,3,5(10)-estratrien-3,17.beta.-diol 17-glucosiduronate	0.148524	1.38208	0.336027	447.207	368.205		C11237	Lipids and lipid-like molecules	Steroids and steroid derivatives	Steroidal glycosides	1013.91	4858.42	2737.89	770.802	1414.15	978.919	2355.29	2461.72	1825.63	2077.27	4158.66	3394.17	2041.31	2087.03	2041.57
M477T271	[M-H]-	1,4-bis[(p-hydroxyphenethyl)amino]anthraquinone	0.147671	1.3193	0.342981	477.196	271.251			Benzenoids	Anthracenes	Anthraquinones	439.605	1590.41	2559.57	2271.11	564.226	442.549	1490.88	1827.3	1307.89	2303.46	1498.28	1951.72	1370.93	1467.22	1371.28
M433T357	[M-H]-	11-(dansylamino)undecanoic acid	0.183687	1.52516	0.102429	433.221	357.436			Benzenoids	Naphthalenes	Naphthalene sulfonic acids and derivatives	709.945	2610.04	2092.77	1522.55	595.991	613.475	1640.88	2791.77	1897.74	2445.79	1700.58	1945.33	1508.66	1542.02	1527.48
M513T316	[M-H]-	11-ketofusidic acid	0.329069	3.39476	0.000754442	513.338	316.147			Lipids and lipid-like molecules	Steroids and steroid derivatives	Steroid esters	522.066	1166.29	1701.83	1172.46	775.74	428.954	2429.45	3173.11	1952.76	4592.64	4501.88	2928.89	2066.57	2020.4	2066.6
M505T287	[M-H]-	11.alpha.-hydroxyprogesterone .beta.-d-glucuronide	0.0852712	0.847021	0.605002	505.239	286.639			Lipids and lipid-like molecules	Steroids and steroid derivatives	Steroidal glycosides	376.503	1787.81	1834.05	1271.26	559.691	406.057	831.395	928.717	493.503	873.012	842.055	1312.81	1018.32	1036.39	1037.94
M307T67	(M-H)-	11(Z),14(Z)-Eicosadienoic Acid	0.287462	1.1453	0.610611	307.263	67.3245						8546.77	15121.5	21626.8	14769.3	2219.67	7490.63	8175.24	14480.8	9334.97	14612.8	15032	18277.4	13858.1	14228.3	13860.2
M415T210	[M-H]-	13:4+4o fatty acyl hexoside	1.76408	0.638231	0.551131	415.16	209.5						41594.1	95179.2	35060.8	527722	196478	14642.8	17325.8	23166.3	9006.66	107570	227612	196541	129574	129575	127801
M591T32	(2M-H)-	13(S)-HODE	0.408529	1.31371	0.135692	591.474	31.764						9105.54	18569.2	19494.6	8794.27	18917	9431.64	16049.2	24448.5	18728.3	16294.1	21251.7	13989.9	19646.3	19683.6	15843.1
M371T111	[M-H]-	15(r),19(r)-hydroxyprostaglandin f1.alpha.	0.811264	0.276853	0.0392735	371.243	111.353			Lipids and lipid-like molecules	Fatty Acyls	Eicosanoids	31827.4	12800.4	5832.34	19918	48320.5	10897	3352.32	3429.82	3436.48	9373.73	7828.6	8457.96	10799.1	10572.1	10570.6
M271T75	[M-H]-	16-hydroxyhexadecanoic acid	0.978678	1.63526	0.010154	271.227	75.209	HMDB0006294	C18218	Lipids and lipid-like molecules	Fatty Acyls	Fatty acids and conjugates	28814.9	35587.5	48747.9	26508.5	38544	18210.8	40694.7	63150	37494.7	51891.3	64292.9	63663.4	38206.5	38195.1	37712.7
M355T23_2	[M-H-H2O]-	16-phenyltetranorprostaglandin f2.alpha.	0.703973	1.05234	0.671243	355.194	23.266			Lipids and lipid-like molecules	Fatty Acyls	Eicosanoids	131471	163688	123931	138926	114306	170736	121797	133879	214678	136934	154237	125662	128365	128378	125599
M369T258	[M-H]-	17-phenyltrinor-13,14-dihydroprostaglandin a2	0.114007	0.946593	0.841171	369.212	257.62			Lipids and lipid-like molecules	Fatty Acyls	Eicosanoids	2629.83	2364.03	6690.99	5032.41	5764.23	1473.54	2764.46	3286.07	2273.06	5230.43	3332.26	5789.38	3321.97	4314.19	4312.12
M455T324	[M-H]-	17-trifluoromethylphenyltrinorprostaglandin f2.alpha.	0.0995499	0.918532	0.789692	455.202	323.68			Lipids and lipid-like molecules	Fatty Acyls	Eicosanoids	401.588	2227.59	2054.13	1647.56	564.318	460.235	969.18	1374.13	869.311	940.606	1011.4	1591.56	634.09	712.947	794.206
M337T275	[M-H]-	18-carboxydinorleukotriene b4	0.339339	0.37927	0.0435445	337.149	274.585			Lipids and lipid-like molecules	Fatty Acyls	Fatty acids and conjugates	2322.91	8353.46	3539.88	7811.45	2901.53	2160.37	1182.03	1411.73	932.051	3619.58	1638.16	1490.73	2554.46	2554.34	2514.81
M255T59	[M-H-CH2O3]-	18-hydroxy-5z,8z,11z,14z,16e-eicosapentaenoic acid	0.404401	1.47504	0.143503	255.196	59.374			Lipids and lipid-like molecules	Fatty Acyls	Eicosanoids	10785	5021.53	16268.9	1724.19	12973.9	6123.37	9839.44	19020.5	10763	10602.9	14781.9	13017.4	13487.6	14993.3	15000.3
M451T24	[M-H-H2O]-	18.beta.-glycyrrhetinic acid	0.187768	0.773479	0.636396	451.323	24.3265			Lipids and lipid-like molecules	Prenol lipids	Triterpenoids	570.061	2629.63	6866.19	14323.2	4381.79	1101.37	2346.2	7860.52	3951.22	2252.6	1360.44	5334.61	5627.95	5504.5	5674.19
M372T289_1	[M-H]-	1h-indole-1-pentanoic acid, 3-[[[1-(aminocarbonyl)-2,2-dimethylpropyl]amino]carbonyl]-	0.138363	0.912176	0.81299	372.197	289.252			Organic acids and derivatives	Carboxylic acids and derivatives	Amino acids, peptides, and analogues	767.21	2912.56	3798.83	2731.96	1333.03	540.179	948.034	858.648	702.111	2862.03	2062.21	3589.48	1481.44	1582.25	1481.9
M685T404_1	[2M-H]-	1h-indole-1-propanoic acid, 3-(1-naphthalenylcarbonyl)-	0.247628	1.41703	0.717446	685.244	404.387			Organoheterocyclic compounds	Indoles and derivatives	Naphthoylindoles	5509.2	3761.99	4341.6	7942.56	1467.53	25845.8	7970.81	53040.2	3668.74	1088.19	1331.95	2148.36	6214.83	6277.98	6233.33
M677T189	[M-H]-	2-(3,4-dihydroxyphenyl)ethyl (4s,5z,6s)-4-[2-[2-(3,4-dihydroxyphenyl)ethoxy]-2-oxoethyl]-5-(2-hydroxyethylidene)-6-[(2s,3r,4s,5s,6r)-3,4,5-trihydroxy-6-(hydroxymethyl)oxan-2-yl]oxy-4h-pyran-3-carboxylate	0.470184	0.257243	0.00426755	677.208	188.548			Lipids and lipid-like molecules	Prenol lipids	Terpene glycosides	12125.6	10188.9	8208.84	4581.6	7418.68	3002.06	621.588	676.424	680.129	3630.61	1958.39	4144.05	5186.91	5186.13	4974.11
M153T50	[M-H]-	2-amino-4-nitrophenol	1.78085	1.96155	0.158421	153.055	49.9825		C19321	Benzenoids	Phenols	Nitrophenols	6600.07	251127	177773	13809.8	13254.5	4613.66	96023.7	146168	167856	104552	240932	160864	136525	139122	136531
M527T288	[2M-H]-	2-cis-4-trans-abscisic acid	0.179343	0.775551	0.662962	527.281	288.173		C06082	Lipids and lipid-like molecules	Prenol lipids	Sesquiterpenoids	203.888	6799.84	5095.26	2203	394.768	152.2	1245.71	1204.08	790.599	3383.54	1977.47	2914.72	2289.81	2332.56	2288.65
M237T357	(M+CH3COO)-	2-Dehydro-3-deoxy-D-gluconate	0.841422	0.37483	0.0764513	237.061	357.403		C00204				16938.1	37029.8	18936.4	68327.3	14780.6	13013.8	8247.41	7313.6	6100.24	15089.6	12391.6	14213.5	17788.3	17795.7	18764
M273T438	(M+CH3COO)-	2-Deoxyribose 5-phosphate	0.102211	0.97418	0.810025	273.037	438.323	HMDB0001031	C00673	Organic oxygen compounds	Organooxygen compounds	Carbohydrates and carbohydrate conjugates	1797.04	1613.64	2032.53	1044.68	1951.64	1956.48	1909.9	1902.87	1493.41	1475.86	1420.65	1924.88	1682.29	1681.82	1721.45
M835T34	[M-H]-	2-docosahexaenoyl-1-stearoyl-sn-glycero-3-phosphoserine	0.809649	0.14965	0.00234131	834.527	34.2485	HMDB0010167		Lipids and lipid-like molecules	Glycerophospholipids	Glycerophosphoserines	9548.3	15248.5	6240.01	29964	23173.1	18903.5	1124.34	1305.49	3081.53	2296.37	4102.74	3515.06	11825.5	11785.9	12477.1
M144T178	[M-H-C7H14O]-	2-heptyl-4-hydroxyquinoline n-oxide	1.32471	0.939142	0.859309	144.045	178.452		C04284	Organoheterocyclic compounds	Quinolines and derivatives	4-hydroxy-2-alkylquinolines	220626	67633.1	133957	40595.8	115236	396815	126167	194301	130038	172028	140235	152766	106091	109064	106247
M186T218	[M-H]-	2-hydroxy-6-methylquinoline-3-carbaldehyde	0.397409	2.1434	0.0207049	186.045	218.16			Organoheterocyclic compounds	Quinolines and derivatives	Quinolones and derivatives	4175.05	4293.38	6898.08	986.199	2099.64	3732.62	10071.5	6532.92	3743.04	5609.37	12315	9279.51	5435.43	5627.07	5627.23
M555T223	[M-H]-	2-hydroxyatorvastatin lactone	0.402312	0.310673	0.1856	555.223	222.872			Organoheterocyclic compounds	Pyrroles	Substituted pyrroles	3341.89	1185.93	998.197	1171.35	9662.56	17356.2	2655.99	2541.14	1735.35	1557.33	1156.1	828.773	3836.05	4269.06	3834.57
M189T77	[M-H]-	2,4-dichlorobenzoic acid	3.43887	0.0162464	0.182294	189.003	76.873		C06670	Benzenoids	Benzene and substituted derivatives	Benzoic acids and derivatives	23317.6	469301	15322.9	1.25788e+06	23370	6801.99	2247.13	5314.23	1618.37	4959.81	8072.81	6966.07	23501	26630.3	23350.6
M220T50	[M-H-CH3]-	2,6-di-tert-butyl-4-methoxyphenol	0.506237	0.691908	0.161606	220.146	49.6655			Benzenoids	Phenols	Methoxyphenols	28048.1	21356.3	14134.9	17382	17871	19640.3	4650.47	19563.4	2676.69	24413.5	18124.5	12516	18431.8	18236.8	16133.9
M202T404	[M-H]-	2,8-quinolinediol	0.203446	1.63714	0.160775	202.048	404.455			Organoheterocyclic compounds	Quinolines and derivatives	Quinolones and derivatives	1536.8	298.846	1160.46	1460.49	3831.24	2467.48	1656.04	2484.41	1095.5	4459.63	3915.68	3996.7	1273.57	1274	1313.02
M267T147	(2M-H)-	2'-Deoxy-D-ribose	1.31339	0.143186	0.106872	267.107	146.856	HMDB0003224	C01801	Organic oxygen compounds	Organooxygen compounds	Carbohydrates and carbohydrate conjugates	158992	11002.5	15132.6	14988.3	40555.8	46012.7	14482.9	5362.24	2072.44	5229.92	9848.23	4053.3	26914.2	25623.8	25543.5
M306T433	[M-H]-	2'-deoxycytidine 5'-monophosphate	0.153782	1.56507	0.0023022	306.048	433.136	HMDB0001202	C00239	Nucleosides, nucleotides, and analogues	Pyrimidine nucleotides	Pyrimidine deoxyribonucleotides	1170.73	877.833	1213.72	1073.55	871.795	987.402	1832.52	1402.69	1116.29	1541.73	1850.75	1951.71	1321.37	1350.2	1321.25
M306T357	(M-H)-	2'-Deoxycytidine 5'-monophosphate (dCMP)	0.0666236	0.915561	0.520746	306.049	356.897	HMDB0001202	C00239	Nucleosides, nucleotides, and analogues	Pyrimidine nucleotides	Pyrimidine deoxyribonucleotides	810.411	873.369	1019.34	1253.12	1013.7	841.687	657.465	727.895	603.358	1128.31	1037.94	1165.94	827.098	888.894	888.664
M403T440_2	(M+NH4-2H)-	2'-Deoxycytidine diphosphate (dCDP)	0.154682	0.722381	0.0633668	403.039	439.848	HMDB0001245	C00705	Organic oxygen compounds	Organic oxoanionic compounds	Organic pyrophosphates	2402.48	1445.1	1772.79	1181.56	2024.75	1755.27	788.546	905.978	1150.15	1462.66	1661.8	1675.07	1502.51	1525.53	1541.13
M150T199	[M-H-CH3]-	2'-hydroxy-4'-methoxyacetophenone	0.170622	0.6594	0.0745025	150.019	198.501		C10712	Organic oxygen compounds	Organooxygen compounds	Carbonyl compounds	1661.03	4230.96	3208.98	4004.25	2608.09	1565.43	2321.77	1529.16	2330.42	1388.09	1783.37	2040.81	2279.98	2307.54	2279.97
M296T189_1	(M-H)-	2'-O-methylguanosine	0.283973	0.65073	0.0148055	296.099	189.226						6001.26	4164.67	4833.39	3912.63	6047.95	6836.36	2572.21	3714.5	4936.08	2077.25	3692.97	3697.77	5391.65	5237.25	5216.83
M257T86	[M-H]-	2'-o-methyluridine	0.413899	0.672958	0.044895	257.077	85.827						13715.9	10193.3	23183.6	11376.1	15645.5	11090.1	8856	8845.3	9349.07	8458.4	10387.2	11443.1	14001.6	14645.8	14039.9
M257T413	[M-H]-	2',4',6'-trihydroxydihydrochalcone	0.149509	1.43269	0.153398	257.088	413.388	HMDB0128079		Phenylpropanoids and polyketides	Linear 1,3-diarylpropanoids	Chalcones and dihydrochalcones	2803.15	2526.95	3139.86	763.019	1227.77	1982.86	3014.41	2879.36	1057.31	2977.25	3620.18	4279.39	2760.27	2759.77	2722.84
M603T453	[2M-H]-	2',6'-dihydroxy 4,4'-dimethoxydihydrochalcone	0.177205	0.618074	0.0211409	603.229	452.655	HMDB0140286		Phenylpropanoids and polyketides	Linear 1,3-diarylpropanoids	Chalcones and dihydrochalcones	2612.41	1093.7	1608.83	1760.01	1817.59	2163.36	916.549	1783.01	853.025	1377.3	943.162	960.319	1747.54	1744.45	1520.71
M309T66	(M-H)-	2E-Eicosenoic acid	0.754275	1.66619	0.00249511	309.278	66.391						17511.4	18359	27152.9	13782.4	18797	18264.1	25592.1	42026	32523.3	25507.6	35103	28971.6	23004.1	23003.8	22937.7
M785T336	[M-H]-	3-(1h-indol-3-ylmethyl)-6,18-dimethyl-9-(2-methylpropyl)-12-(1-phenylethyl)-15-propan-2-yl-1,4,7,10,13,16,19-heptazacyclotricosane-2,5,8,11,14,17,20-heptone	0.184334	1.36448	0.399205	785.43	336.499			Organic acids and derivatives	Peptidomimetics	Hybrid peptides	330.23	3063.6	3460.78	1355.05	225.041	325.046	1832.72	2246.49	2085.47	2229.88	1650.39	1907.56	1654.62	1727.57	1656.2
M271T137	[M-H]-	3-(2,6-dihydroxyphenyl)-4-hydroxy-6-methyl-3h-2-benzofuran-1-one	0.951359	0.178122	0.0460162	271.081	136.928			Organoheterocyclic compounds	Benzofurans	Benzofuranones	82511.5	43040.8	10610.4	41777.4	11793.8	8287.37	3043.03	2538.61	2645.39	10933.1	7204.15	8907.67	19261	19620.9	19618.8
M1059T190	[M-H]-	3-(3'-o-malonyl)glu(1-4)glu-28-glu bayogenin	0.420618	0.384791	0.196672	1059.48	189.748			Lipids and lipid-like molecules	Prenol lipids	Terpene glycosides	6768.66	128.531	1244.44	205.509	10722.4	13583	3186.86	1039.28	2214.85	3685.29	1501.25	936.893	6531.67	6718.43	6531.56
M255T69	[M-H]-	3-(5-phenylthiophen-2-yl)prop-2-ynyl acetate	0.134736	1.11142	0.83309	255.05	69.488			Organoheterocyclic compounds	Thiophenes	2,5-disubstituted thiophenes	11460.9	10275.9	5625.64	13261.1	12626.9	7604.36	1993.29	2406.4	26485.6	4067.13	28062	4620.55	7856.61	8011.08	7728.56
M167T324	[M-H]-	3-(methylthio)benzoic acid	0.535301	2.94779	0.208285	167.035	323.55			Benzenoids	Benzene and substituted derivatives	Benzoic acids and derivatives	1949.95	9638.79	4420.25	8071.52	1124.77	635.807	2427.87	29793.4	33620.9	4596.3	2326.09	3409.54	5432.75	4662.35	5434.71
M289T77	[M-H-H2O]-	3-cyclopentene-1-octanoic acid, 2-(3-hydroxy-1-penten-1-yl)-5-oxo-	3.51285	0.065511	0.13981	289.18	76.669			Lipids and lipid-like molecules	Fatty Acyls	Eicosanoids	14627.7	1.44555e+06	350927	487815	17731	19459.7	9434.5	15304.4	9751.04	57256.2	34206.4	27088.2	308459	315368	308501
M171T284	[M-H-H2O]-	3-dehydroquinic acid	0.735052	0.188935	0.0367613	171.029	284.191		C00944	Organic acids and derivatives	Hydroxy acids and derivatives	Alpha hydroxy acids and derivatives	10383.8	43695.7	9567.45	23979.5	10535.2	6119.79	5365.36	2726.52	2894.82	3897.24	1685.64	3132.84	10661.7	10658	10330.3
M171T333	(M-H)-	3-Dehydroshikimic acid	0.189579	0.683618	0.00499224	171.029	333.158						2932.3	3234.27	2084.48	2696.04	2774.48	1978.97	1743.98	1439.81	1485.22	1923.28	2009.35	2131.52	2231.99	2322.19	2217.92
M274T446	(M+NH4-2H)-	3-Deoxy-2-keto-6-phosphogluconic acid	0.722515	2.79477	0.00368076	274.14	446.335	HMDB0001376	C04442	Organic acids and derivatives	Keto acids and derivatives	Medium-chain keto acids and derivatives	3260.43	8562.47	13936.1	6633.74	3367.2	3243.51	16044.8	15482.9	9913.94	28857.5	18907.1	19799.4	11969	12086.1	11968.1
M535T381	[2M-H]-	3-deoxy-d-glycero-d-galacto-2-nonulosonic acid	0.082456	1.18385	0.448413	535.149	380.82			Organic oxygen compounds	Organooxygen compounds	Carbohydrates and carbohydrate conjugates	2319.46	2376.78	1980.43	1623.51	1984.51	1190.33	2853.29	581.727	2235.78	3132.33	1684.55	3097.01	1294.47	1474.99	1476.96
M958T343	[M-H]-	3-glc-gal-glcua-soyasapogenol b	0.212756	4.32796	0.00026133	957.515	343.424			Lipids and lipid-like molecules	Prenol lipids	Terpene glycosides	70.149	353.253	965.164	74.426	28.6744	115.977	1208.88	1167.57	1000.66	945.755	1402.77	1232.18	770.214	745.802	770.462
M161T438	(M-H)-	3-Hydorxy-3-methylglutaric acid	0.146637	1.15668	0.486718	161.045	438.175	HMDB0000355/HMDB0059737	C03761	Lipids and lipid-like molecules	Fatty Acyls	Fatty acids and conjugates	1851.93	2916.75	3963.16	3229.88	1837.91	1993.07	2362.37	4935.74	3800.13	2311.05	2515.91	2341.84	2539.19	2542.01	2529.01
M152T156	[M-H]-	3-hydroxyanthranilic acid	0.415938	0.893649	0.507195	152.035	155.773	HMDB0001476	C00632	Benzenoids	Benzene and substituted derivatives	Benzoic acids and derivatives	33707.5	48349.8	53406.2	38503.4	45374.1	51299.4	30833.7	31774.2	26892	33938.8	65132	53286.8	37819.2	38673.7	38054.7
M155T220	(M+K-2H)-	3-Hydroxyisovaleric acid	0.494999	0.548314	0.136646	155.009	220.134	HMDB0000754		Lipids and lipid-like molecules	Fatty Acyls	Fatty acids and conjugates	43808.6	18605.4	16105.5	18109.7	9328.31	8159.74	8970.13	10464.8	9084.38	11171.2	10228.3	12653.3	12128.1	12360.6	12362.9
M223T275	[M-H]-	3-hydroxykynurenine	0.221901	0.549217	0.019983	223.071	275.247	HMDB0000732	C02794	Organic oxygen compounds	Organooxygen compounds	Carbonyl compounds	2546.41	2826.91	1930.57	3402.42	2992.16	3970.82	3353.27	1529.27	859.373	1382.28	1832.22	747.849	1557.64	1923.33	1922.33
M263T43	(M-H)-	3-Methoxy-4-Hydroxyphenylglycol Sulfate	0.755789	0.532052	0.166018	263.022	43.4655	HMDB0003332		Benzenoids	Phenols	Methoxyphenols	33048	14197.8	16737.8	26536.7	56908.9	18733.9	5331.35	7319.02	6398.11	8403.6	19470.9	41484.5	20748.6	20750.4	20513.5
M177T242	[M-H]-	3-methoxycinnamic acid	0.352658	0.598071	0.0529079	177.076	242.427	HMDB0125518		Phenylpropanoids and polyketides	Cinnamic acids and derivatives	Hydroxycinnamic acids and derivatives	9614.47	9032.76	6192.4	5230.31	6260.03	6705.09	2633.72	2655.13	1301.77	6793.78	4077.14	8276.46	6537.17	6703.87	6536.2
M411T175	[M-H]-	3-methoxylimaprost	0.750726	1.9185	0.235452	411.284	174.784			Lipids and lipid-like molecules	Fatty Acyls	Eicosanoids	1889.88	11058	50737.1	6836.56	2299.27	5006.64	20034.3	51481.4	21859.5	17225	14637.1	24074.5	19602.4	21712.2	21703.2
M425T385	[M-2H]2-	3-methylbutanoyl-coa	0.0893847	0.762855	0.414464	424.577	385.377	HMDB0001113	C02939	Lipids and lipid-like molecules	Fatty Acyls	Fatty acyl thioesters	689.011	573.583	270.293	642.133	728.139	1120.85	543.927	249.83	111.186	288.724	1053.66	822.412	495.035	510.064	510.492
M149T138	[M-H]-	3-tert-butylphenol	1.36614	0.175933	0.169139	149.096	138.002		C14188	Benzenoids	Benzene and substituted derivatives	Phenylpropanes	98809.8	5328.84	5243.87	4324.97	188502	27876.1	9093.12	10705.6	15889.9	4722.4	11770.8	5891.08	36377.4	36509.2	36510.7
M487T156	(2M-H)-	3,3',4,5'-Tetrahydroxy-trans-stilbene	0.455383	0.708878	0.274016	487.129	156.423						11113.9	35334.6	17590.2	33383.9	13040.1	8377.94	19445.2	13447.8	12201.8	9393.05	16662.2	13093.6	14607.5	14607.8	14794.1
M161T309	[M-H]-	3,4-dichlorophenol	0.250861	1.24639	0.0174846	160.949	308.552		C14462	Benzenoids	Benzene and substituted derivatives	Halobenzenes	6289.11	5956.89	6803.17	4566.97	6459.6	6373.19	7456.63	8043.79	8744	5941.93	6933.18	8309.89	6670.78	6559.45	6669.9
M213T72	[M-H]-	3,4-dihydroxybenzophenone	0.779097	0.467278	0.0563377	213.076	71.71			Benzenoids	Benzene and substituted derivatives	Benzophenones	35711.1	15216.6	25435.3	17860.2	60772.2	19169.4	11445	17788	10234.8	11970.6	18374.2	11570.7	22811.7	23756.1	22809.6
M264T266	[M-H]-	3,4-dihydroxycinnamic acid (l-alanine methyl ester) amide	0.259232	0.401979	0.00217125	264.09	266.128			Organic acids and derivatives	Carboxylic acids and derivatives	Amino acids, peptides, and analogues	3266.28	1467.09	1435.55	1796.94	2576.47	3005.55	859.085	747.725	825.064	990.308	935.683	1088.1	1419.2	1347.77	1418.94
M617T202	[M+C2F3O2]-	3.alpha.,4.beta.-galactotriose	0.485157	0.140287	0.151492	617.145	201.718			Organic oxygen compounds	Organooxygen compounds	Carbohydrates and carbohydrate conjugates	2146.74	9606.16	2222.13	25400.3	2191.26	670.144	743.694	965.566	725.129	1324.51	1551.12	615.261	3292.29	3292.07	3228.06
M321T92	[M-H-C5H10O2]-	3.beta.-hydroxymevastatin	0.881729	0.1973	0.140937	321.154	91.701			Organic acids and derivatives	Hydroxy acids and derivatives	Medium-chain hydroxy acids and derivatives	4788.69	43026.9	9091.62	77673.8	4496.77	7728.2	6008.74	8283.8	6467.41	6319.38	522.349	1363.14	20794.5	19526.4	20784.3
M423T171	[M-H-CO2]-	3'-hydroxyrepaglinide	4.91567	1.82065	0.349206	423.284	171.358	HMDB0060979		Organoheterocyclic compounds	Piperidines	Phenylpiperidines	18713.4	348190	2.75876e+06	257449	15487	22828.4	460273	902100	684056	1.37293e+06	1.177e+06	1.63287e+06	819197	826545	826527
M312T441	[M-H]-	3',5'-cyclic damp	0.111655	1.25141	0.26004	312.058	440.833			Organoheterocyclic compounds	Imidazopyrimidines	Purines and purine derivatives	932.566	683.217	870.695	465.241	1274.7	1404.38	1406.14	1516.41	1443.5	769.518	1104.99	805.885	788.605	814.532	814.371
M344T271	(M-H)-	3',5'-Cyclic guanosine monophosphate	0.0840703	1.00652	0.955762	344.037	270.755						2665.63	3074.95	4133.76	3666.93	2310.68	2543.54	2652.7	3948.29	2995.66	2798.37	3358.5	2761.92	3205.47	3377.36	3187.93
M407T63	[M-H]-	3alpha,7beta,12alpha-trihydroxy-5beta-cholan-24-oic acid	1.85265	2.20629	0.10173	407.288	62.589	HMDB0000917	C17644	Lipids and lipid-like molecules	Steroids and steroid derivatives	Bile acids, alcohols and derivatives	24393.6	114462	219853	21894.7	20913.6	27702.8	6668.88	186489	129012	206406	166478	251930	111840	111829	107969
M152T166	[M-H]-	4-aminosalicylic acid	0.365807	0.986825	0.97889	152.011	166.154	HMDB0014378	C02518	Benzenoids	Benzene and substituted derivatives	Benzoic acids and derivatives	18443.7	3754.77	4333.46	1780.3	17454.4	13754.1	2326.16	20629.8	689.63	1736.11	16020.5	17334.3	6613.57	6679.95	6707.64
M121T198	[M-H]-	4-hydroxybenzaldehyde	0.262459	0.894362	0.101009	121.029	198.043	HMDB0011718	C00633	Organic oxygen compounds	Organooxygen compounds	Carbonyl compounds	14194.3	14249.9	12359.3	13445.9	11991.1	12561.1	10062.7	13192.6	10092.2	10906.5	12440.2	13783.1	15379.6	16977.2	15295.8
M458T268	[M-H]-	4-imidazolidineheptanoic acid, 3-[(2-cyclohexyl-2-hydroxyethyl)amino]-2,5-dioxo-1-(phenylmethyl)-	0.457522	1.19432	0.727585	458.26	268.148			Organoheterocyclic compounds	Azolidines	Imidazolidines	1290.15	45841.8	21534.7	18991.2	1327.63	1366.17	11389.4	14912.8	5815.39	25513.3	31079.1	19199.1	12398.7	12498.2	12500.6
M329T287	[M-H]-	4,2'-dihydroxy-3,4',6'-trimethoxychalcone	0.370587	0.440094	0.161338	329.086	286.563			Phenylpropanoids and polyketides	Linear 1,3-diarylpropanoids	Chalcones and dihydrochalcones	2174.98	13452.4	4331.55	13160.6	1775.52	2250.23	3073.19	2174.02	1956.12	3053.81	3441.47	2648.85	4342.58	4341.04	4261.74
M251T332_1	[M-H]-	4'-hydroxy-6-methylflavone	0.221958	0.438364	0.00221382	251.069	332.188			Phenylpropanoids and polyketides	Flavonoids	Hydroxyflavonoids	1875.22	1872.96	1766.29	2179.65	1477.75	3224.23	1011.74	900.98	572.082	678.634	759.247	1511.33	1004.33	1001.02	1086.35
M590T468	[M-H]-	5-(diethoxyphosphoryl)-5-methyl-1-pyrroline-n-oxide-biotin	0.0958181	0.784507	0.0175172	590.229	467.864						956.054	949.033	1007.89	654.067	964.986	866.777	645.469	689.516	550.042	734.713	748.994	866.668	891.787	885.494	883.747
M255T55	[M-H]-	5-ethyl-2'-deoxyuridine	1.03222	0.240376	0.159284	255.113	55.318			Nucleosides, nucleotides, and analogues	Pyrimidine nucleosides	Pyrimidine 2'-deoxyribonucleosides	58019.8	7414.52	7021.6	7877.48	113686	18098.4	6925.23	13294.4	13180.8	5191.34	6519.76	5876.61	22571.1	23680.2	23694.7
M755T366	[M-H]-	5,7-dihydroxy-2-[4-[(2s,3r,4s,5s,6r)-3,4,5-trihydroxy-6-(hydroxymethyl)oxan-2-yl]oxyphenyl]-3-[(2s,3r,4s,5s,6r)-3,4,5-trihydroxy-6-[[(2r,3r,4r,5r,6s)-3,4,5-trihydroxy-6-methyloxan-2-yl]oxymethyl]oxan-2-yl]oxychromen-4-one	0.211811	0.266983	0.0379289	755.202	365.981			Phenylpropanoids and polyketides	Flavonoids	Flavonoid glycosides	720.834	1532.11	1011.25	3836.73	1666.45	758.09	228.771	158.118	389.308	676.704	728.353	361.882	1003.27	1050.13	1054.52
M547T252_1	[M-H]-	5,7-dihydroxy-2-phenyl-6-[3,4,5-trihydroxy-6-(hydroxymethyl)oxan-2-yl]-8-(3,4,5-trihydroxyoxan-2-yl)chromen-4-one	0.574347	0.176884	0.00551888	547.143	251.6	HMDB0140256		Phenylpropanoids and polyketides	Flavonoids	Flavonoid glycosides	4118.53	13508.7	7677.72	18023.6	9457.79	4339.18	1397.16	1601.99	1097.21	2276.87	2000.06	1731.31	7584.23	8365.38	7570.34
M308T95	[M-H]-	5'-o-acetyladenosine	0.299018	1.02094	0.880162	308.098	95.38						23548.1	30501.9	38007.9	17769.6	19723.7	22627.9	25776.2	27058.7	21015.6	22204.5	29629	29681.1	25670.2	25098.2	25671
M255T203	[M-H]-	5'-O-methylthymidine	0.430993	0.338513	0.0299654	255.088	203.159			Nucleosides, nucleotides, and analogues	Pyrimidine nucleosides	Pyrimidine 2'-deoxyribonucleosides	7873.58	3165.81	1911.72	1922.08	8255.05	9513.51	1750	1982.48	1548.48	1739.53	2301.23	1727.94	3907.57	3781.75	3781.07
M675T444	[2M-H]-	5'-phosphoribosyl-5-amino-4-imidazolecarboxamide (aicar)	0.165901	2.17336	0.0238928	675.106	443.869	HMDB0001517	C04677	Nucleosides, nucleotides, and analogues	Imidazole ribonucleosides and ribonucleotides	1-ribosyl-imidazolecarboxamides	370.811	366.277	1175.28	412.719	555.263	548.984	754.958	921.745	689.616	1923.54	1365.26	1798.04	977.225	991.409	991.4
M168T468	[M-H]-	6-Hydroxydopamine	0.160802	0.951801	0.633357	168.042	467.871	HMDB0001537		Benzenoids	Phenols	Benzenediols	12577.3	14851.2	15296.9	15454.4	16385.4	10111.9	15381.6	8843.92	14905.3	12516	14613.9	14334.8	12564	12554.1	12146.7
M164T37	[M-H]-	6-methoxybenzoxazolin-2(3h)-one	0.994017	0.744816	0.531349	164.035	36.892	HMDB0036582	C08579	Organoheterocyclic compounds	Benzoxazoles	Benzoxazolones	43020	254872	118264	119736	29057.9	61202.2	36303.2	44354.6	38830.9	114937	54414.9	177527	124338	122801	124312
M257T436	(M-H2O-H)-	6-Phospho-D-gluconate	0.0924876	0.976489	0.804191	257.006	436.306	HMDB0001316	C00345	Organic oxygen compounds	Organooxygen compounds	Carbohydrates and carbohydrate conjugates	2253.99	1999.97	2086.12	1746.53	2129.18	2154.37	2177.3	1491.49	1438.7	2227.06	2389.68	2355.1	1802.77	1795.07	1720.23
M257T381	[M-H-H2O]-	6-phosphogluconic acid	0.254519	0.664289	0.0430991	257.027	380.758	HMDB0001316	C00345	Organic oxygen compounds	Organooxygen compounds	Carbohydrates and carbohydrate conjugates	5588.31	2986.7	3079.12	2153.49	4579.92	4190.25	2446.06	1920.31	2195.65	2370.76	3220.81	2844.58	2886.79	2885.17	2730.7
M739T289	[M-H]-	7-[6-[[3,4-dihydroxy-6-methyl-5-[3,4,5-trihydroxy-6-(hydroxymethyl)oxan-2-yl]oxyoxan-2-yl]oxymethyl]-3,4,5-trihydroxyoxan-2-yl]oxy-5-hydroxy-3-(4-hydroxyphenyl)chromen-4-one	0.393023	0.267743	0.00545104	739.207	289.351			Phenylpropanoids and polyketides	Isoflavonoids	Isoflavonoid O-glycosides	3599.86	5218.12	2460.56	8450.93	4761.86	2920.29	589.156	584.195	315.456	2207.9	1798.31	1844.24	2844.19	2882.45	2844.16
M181T91	[M-H]-	7-methyluric acid	0.746037	0.57219	0.297699	181.013	91.135	HMDB0011107	C16355	Organoheterocyclic compounds	Imidazopyrimidines	Purines and purine derivatives	38941.7	12195.2	9694.84	8502.48	19485.7	73501.8	12964.9	22140.6	19832.2	15208.1	9961.14	12771.8	17733.4	17729.6	17102.6
M383T335	[2M-H]-	7,8-dihydroxy-4-methylcoumarin	1.75813	0.260832	0.140974	383.081	335.151	HMDB0136757		Phenylpropanoids and polyketides	Coumarins and derivatives	Hydroxycoumarins	161534	3000.99	707.585	7081.49	187562	110171	33718.2	6393.76	17566.7	1221.85	2646.24	61059	85446.8	86526.6	86529.1
M177T197	[M-H]-	7,8-dihydroxycoumarin	0.93884	0.424058	0.00430036	177.019	196.819	HMDB0130547	C03093	Phenylpropanoids and polyketides	Coumarins and derivatives	Hydroxycoumarins	25964.4	44587.7	21185	44659	57630.5	29156	14098.8	13075.8	15454.8	16173.5	21550.2	14289.4	16649.8	16616.3	10566.2
M477T25	[M-H-H2O]-	7.alpha.,17.alpha.-dimethyl-5.beta.-androstane-3.alpha.,17.beta.-diol glucuronide	3.29115	1.21603	0.701003	477.303	25.1			Lipids and lipid-like molecules	Steroids and steroid derivatives	Steroidal glycosides	331545	38538.9	346689	41966.7	2.40698e+06	1.58958e+06	905112	1.46982e+06	363233	751539	1.38573e+06	907165	1.07809e+06	1.0747e+06	1.08806e+06
M515T262	[M-H]-	9-hydroxy-5b,8,11a-trimethyl-1-prop-1-en-2-yl-1,2,3,4,5,6,7,7a,9,10,11,11b,12,13,13a,13b-hexadecahydrocyclopenta[a]chrysene-3a,5a,8-tricarboxylic acid	0.21379	0.85422	0.739517	515.281	261.833			Lipids and lipid-like molecules	Prenol lipids	Triterpenoids	837.502	8618.63	8310.47	4426.41	872.5	612.39	2289.88	2584.81	1582.22	5956.16	3078.98	4734.09	2784.76	2804.96	2784.62
M587T57	(2M-H)-	9-OxoODE	0.52873	0.701337	0.514089	587.429	56.9825						1099.82	39255	25863.1	40370.9	1014.94	1881.94	16492.7	13013.9	4391.49	15359.1	15610.1	11919	17091.1	17001.5	17003.2
M341T23	[M-H]-	9-phenyl-1-(2,4,6-trihydroxyphenyl)nonan-1-one	0.613402	1.16784	0.118087	341.178	22.732			Organic oxygen compounds	Organooxygen compounds	Carbonyl compounds	70274.8	88341.8	74605.5	75492.5	52627.9	67355.4	64694	84070.4	103635	83749.3	78432.7	86071.4	73918.7	75487.1	74041
M931T287	[2M-H]-	9z-octadecenoic acid, (2s)-3-[(hydroxymercaptophosphinyl)oxy]-2-methoxypropyl ester	0.811496	5.01381	0.000603012	931.488	286.849			Lipids and lipid-like molecules	Fatty Acyls	Fatty acid esters	304.834	10143.1	7892.54	1734.66	218.78	415.582	14323.2	25705.9	14391.9	22262.4	13961.5	13188.3	10635.8	10635.8	10609.5
M195T28	(M-H)-	Acetosyringone	0.974277	0.0839438	0.00319526	195.066	28.482						28499.7	20019.7	6933.66	6765.89	36856.8	26897.2	1053.67	1566.97	764.083	1988.15	3116.63	2085.16	10167	9850.51	10457.5
M139T427	[M-H]-	Acetyl phosphate	0.206532	1.08354	0.314313	138.98	427.394	HMDB0001494	C00227	Organic acids and derivatives	Organic phosphoric acids and derivatives	Phosphate esters	8792.46	6522.16	9171.11	5791.39	6805.46	7497.51	8326.84	7696.36	8803.53	8343.83	7263.53	7870.36	7569.17	7675.02	7570.24
M172T185	[M-H]-	Acetyl-dl-leucine	0.670213	0.444235	0.129722	172.097	185.461			Organic acids and derivatives	Carboxylic acids and derivatives	"Amino acids, peptides, and analogues"	9472.82	44501.9	35507.8	29181.1	10183	3716.13	3598.23	3239.15	2146.17	18890.6	15325.3	15689.7	15511.5	15506.6	14634.8
M158T429	(M-H)-	Acetyl-DL-Valine	0.0805065	0.88287	0.373026	158.082	428.726						1567.99	1499.23	1994.95	1069.03	1592.71	1559.04	1560.39	660.493	1535.9	1720.45	1293.2	1425.21	1142.95	1237.14	1143.44
M134T94	[M-H]-	Acetylaniline	0.662011	1.06516	0.565879	134.047	94.3585	HMDB0001250	C07565				101014	121681	144772	90098	87197.2	115071	114489	134801	95791.8	95996.5	145077	116676	100910	102134	100896
M329T105	(M+K-2H)-	Acetylvalerenolic acid	2.38548	0.126042	0.14409	329.122	104.585						17982.6	340040	42852.1	507315	16733.8	22059.9	8140.06	4256.41	16553.4	37476.2	28875.4	24058.5	97731.7	99704.1	99714.8
M693T420	[2M-H]-	Adenosine 2'-monophosphate	0.748577	3.83281	4.54584e-05	693.118	419.538		C00946	Organic oxygen compounds	Organooxygen compounds	Carbohydrates and carbohydrate conjugates	4502.94	3106.84	6525.63	1136.27	3968.82	5319.37	18030.9	17816.2	15270	8429.46	18004.2	16582.4	7286.16	7330.55	7285.92
M426T458	[M-H-SO3]-	Adenosine 3'-phosphate 5'-phosphosulfate	0.611962	1.56372	0.00642271	426.02	458.364	HMDB0001134	C00053	Nucleosides, nucleotides, and analogues	Purine nucleotides	Purine ribonucleotides	20191.1	10504.8	20595.5	6133.08	21647.1	17550.3	26198.7	23848.6	25891	24848.5	23409.4	26893.7	19097.1	19867.6	19101.9
M328T260	[M-H]-	Adenosine 3',5'-cyclic monophosphate	0.439887	0.041794	0.0996356	328.044	260.032	HMDB0000058	C00575	Nucleosides, nucleotides, and analogues	Purine nucleotides	Cyclic purine nucleotides	113.183	13880.8	3159.32	13236.6	132.362	256.995	243.461	274.72	332.692	58.8822	196.574	180.059	3245.41	3303.23	3303.36
M462T485	[M-H]-	Adenylosuccinate	0.89062	2.24927	0.00142454	462.065	485.399	HMDB0000536	C03794	Nucleosides, nucleotides, and analogues	Purine nucleotides	Purine ribonucleotides	20986.2	10153	18879.5	5702.02	13958.2	22065.7	41399.3	30522.2	23203.7	28764.8	46253.1	36215.1	24287.7	24277	23695.8
M145T225	(M-H)-	Adipic acid	0.614395	0.652092	0.296946	145.05	224.777	HMDB0000448	C06104	Lipids and lipid-like molecules	Fatty Acyls	Fatty acids and conjugates	91439.3	26156.3	55745.3	21755.9	37056.9	9898.61	12141.6	23325.4	17597.4	38817.2	35911.6	30047.1	36299.4	33031.1	32796.7
M558T415	[M-H]-	Adp-ribose	0.154089	1.14182	0.698157	558.063	415.01	HMDB0001178	C00301	Nucleosides, nucleotides, and analogues	Purine nucleotides	Purine nucleotide sugars	2517.49	758.54	1544.15	561.946	1533.28	4524.75	2292.02	3361.59	2837.21	1521.76	1453.39	1596.63	1601.91	1625.34	1625.42
M189T317	[M-H]-	Ala-Thr	0.275355	1.30874	0.540602	189.087	317.151			Organic acids and derivatives	Carboxylic acids and derivatives	Amino acids, peptides, and analogues	804.079	9392.07	9182.69	5788.18	1135.02	911.675	3649.15	3636.48	2242.76	11175.7	5880.64	9030.84	4958.89	4959.53	4852.65
M251T273	[M-H]-	Ala-Tyr	0.288992	1.62521	0.120227	251.103	272.663			Organic acids and derivatives	Carboxylic acids and derivatives	Amino acids, peptides, and analogues	1901.26	3573.36	6746.71	3462.97	2224.3	1734.9	3223.25	4428.26	2869.48	8729.08	5585.04	7089.7	3699.49	3767.84	3699.81
M277T67	(M-H)-	all cis-(6,9,12)-Linolenic acid	10.3583	0.742433	0.327239	277.218	67.054						4.74915e+06	1.55105e+07	1.50922e+07	1.68965e+07	4.62348e+06	5.40255e+06	5.14345e+06	8.07919e+06	5.27648e+06	9.83901e+06	8.17334e+06	9.72303e+06	1.02275e+07	1.02268e+07	1.00307e+07
M179T254_2	[M-H]-	Alpha-d-glucose	8.13128	0.0613852	0.160482	179.056	253.637	HMDB0003345	C00267	Organic oxygen compounds	Organooxygen compounds	Carbohydrates and carbohydrate conjugates	33275.4	6.94952e+06	549628	3.81202e+06	47409.4	13218	128930	14483.7	14553.8	391532	65355.1	85247.8	848649	853875	848651
M241T336	(M-H2O-H)-	alpha-D-Glucose 1-phosphate	0.105815	0.910637	0.16796	241.011	335.909	HMDB0001586	C00103	Organic oxygen compounds	Organooxygen compounds	Carbohydrates and carbohydrate conjugates	2559.56	2222.82	2271.92	2350.71	2130.72	2187.87	2238.99	1656.58	2130.58	1840.39	2508.91	2121.76	2866.98	2477.27	2455.49
M188T358	(M-H)-	alpha-Guanidinoglutaric Acid	0.100994	1.34139	0.312809	188.067	357.83						748.32	1693.95	1673.64	1323.57	1076.19	956.909	1285.76	1492.51	928.243	3449.02	1284.04	1584.1	1280.61	1280.81	1293.79
M429T31_2	[M-H]-	alpha-Tocopherol (Vitamin E)	1.09725	1.31803	0.338956	429.371	30.775	HMDB0001893	C02477	Lipids and lipid-like molecules	Prenol lipids	Quinone and hydroquinone lipids	84956.7	124163	120465	105671	132709	44326.1	52159	90136.3	67854.4	185451	206638	204781	138508	139157	139157
M584T398	[M-H]-	Amikacin	0.201257	2.3444	0.0356308	584.292	398.065	HMDB0014622	C06820	Organic oxygen compounds	Organooxygen compounds	Carbohydrates and carbohydrate conjugates	224.705	1927.28	1422.49	507.307	211.044	120.565	1446.45	1383.31	1024.81	2880.37	1594.44	2017.41	1487.14	1547.83	1548.02
M128T73	M-	Ammelide	0.212242	0.714817	0.39402	128.035	72.8065						1965.74	1447.06	8236.35	8505.77	14197.9	8722.64	4342.54	6310.81	4993.97	10329.6	2579.61	2234.55	9285.24	9523.61	9255.52
M485T44	[M-H]-	Andrastin a	0.850457	0.340507	0.126319	485.273	44.4405			Lipids and lipid-like molecules	Steroids and steroid derivatives	Steroid esters	2825.56	59436	40550.5	57331.5	8946.64	2885.77	5359.2	4045.51	5099.37	18366.2	7552.7	18136	15527.8	17786.4	17923.2
M465T262	[M-H]-	Androsterone glucuronide	0.123643	1.62353	0.080205	465.268	261.955	HMDB0002829	C11135	Lipids and lipid-like molecules	Steroids and steroid derivatives	Steroidal glycosides	1471.92	1114.91	468.321	889.633	907.041	655.626	1032.27	1306.58	914.97	2574.52	1886.08	1227.09	1288.75	1326.37	1287.99
M369T25	(M-H)-	Androsterone sulfate	0.554505	0.654495	0.0663785	369.172	24.748						37511.3	21009.6	31922.3	17198.7	39019.3	14733.4	13424.3	17342.7	23059.3	16865.2	18229.4	16711.1	17161.7	17059.9	17118.1
M563T247	(M-H)-	APIIN	0.519027	0.233806	0.000513907	563.138	246.976	HMDB0030843	C04858	Phenylpropanoids and polyketides	Flavonoids	Flavonoid glycosides	6847.93	11647.4	9136.27	8476.86	4531.26	4978.01	803.01	3168.12	996.886	2326.77	1522.68	1848.25	4790.54	5467.48	5468.14
M288T266	[M-H]-	Arg-asp	0.829178	1.78511	0.135226	288.155	266.245			Organic acids and derivatives	Carboxylic acids and derivatives	Amino acids, peptides, and analogues	1716.83	41643.9	41003.5	25689.2	2493.15	998.954	31720.9	27772.8	25287.6	53412.4	26394.7	38102.9	22018	22017.8	21942.9
M302T473	[M-H]-	Arg-glu	0.203034	1.95274	0.00322323	302.146	472.737			Organic acids and derivatives	Carboxylic acids and derivatives	Amino acids, peptides, and analogues	1064.4	881.149	1210.33	878.465	1151.32	890.871	2075.24	2434.93	1068.06	1645.34	2758.69	1883.64	1474.53	1534.12	1474.52
M386T380	[M-H]-	Arg-Gly-Arg	0.282351	2.13367	0.00673811	386.214	380.298			Organic acids and derivatives	Carboxylic acids and derivatives	Amino acids, peptides, and analogues	540.59	2488.62	2823.6	1284.07	755.076	474.076	3277.24	3731.94	2483.65	3168.2	2640.46	2548.87	1916.45	2046.27	1910.06
M286T238	[M-H]-	Arg-Leu	0.667189	1.46467	0.389363	286.176	237.927			Organic acids and derivatives	Carboxylic acids and derivatives	Amino acids, peptides, and analogues	1626.31	44313.8	41180	25654.5	1871.07	1456.04	18434.3	23378.9	12713.6	50703.4	29590.9	35229.3	24306.7	24387.8	23875.7
M320T261	[M-H]-	Arg-phe	0.280549	0.356735	0.0134842	320.16	260.697			Organic acids and derivatives	Carboxylic acids and derivatives	Amino acids, peptides, and analogues	3915.84	2185.6	3454.78	1679.23	5588.61	1599.04	1088.71	574.842	573.535	1508.84	1577.76	1248.46	2041.98	2122.96	2043.56
M523T26_2	[M+Cl]-	Asiatic acid	12.9967	0.472558	0.250144	523.309	26.346	HMDB0035782	C08617	Lipids and lipid-like molecules	Prenol lipids	Triterpenoids	1.51785e+07	231264	3.39541e+06	119589	8.42399e+06	6.91774e+06	1.1403e+06	1.82313e+06	354373	3.44016e+06	4.45665e+06	4.97831e+06	4.72131e+06	4.44075e+06	4.71871e+06
M232T339	[M-H]-	Asn-Thr	0.426313	1.58366	0.188689	232.093	338.99			Organic acids and derivatives	Carboxylic acids and derivatives	Amino acids, peptides, and analogues	2332.64	12662.8	14718.3	8041.38	2915.62	2242.41	7535.61	8710.62	6000	17827.8	12622.9	15263.1	8720.36	8848.37	8908.01
M317T252	[M-H]-	Asn-Trp	0.217784	1.03687	0.900606	317.147	251.984			Organic acids and derivatives	Carboxylic acids and derivatives	Amino acids, peptides, and analogues	7525.73	9250.52	16040.8	9021.53	15892.4	3396.89	8481.95	6460.96	3873.42	12562.5	14181.9	17820.8	10748.6	10929.2	10750.4
M203T411	[M-H]-	Asp-Ala	0.111593	1.18399	0.465143	203.066	411.282			Organic acids and derivatives	Carboxylic acids and derivatives	Amino acids, peptides, and analogues	1811.95	6542.16	3642.25	3051.5	2691.89	3189.3	4738.28	3114.5	2385.37	3779.29	4808.86	5953.57	4017.24	3997.41	3678.44
M288T433	[M-H]-	Asp-Arg	0.218403	1.95041	0.000344873	288.13	432.791			Organic acids and derivatives	Carboxylic acids and derivatives	Amino acids, peptides, and analogues	1059.08	870.234	1592.88	1031.27	985.994	950.854	1905.43	2362.55	1608.58	2719.8	2189.01	1873.37	1396.06	1427.88	1395.94
M261T453	[M-H]-	Asp-Glu	0.113909	0.850954	0.449628	261.072	452.536			Organic acids and derivatives	Carboxylic acids and derivatives	Amino acids, peptides, and analogues	1884.23	4267.08	4434.29	2730.3	1829.58	1658.6	2561.91	2609.89	1782.61	2251.11	2454.07	2639.91	2452.23	2379.04	2452.24
M131T367	[M-H]-	Asparagine	0.946345	1.51393	0.325244	131.046	366.525	HMDB0000168	C16438	Organic acids and derivatives	Carboxylic acids and derivatives	Amino acids, peptides, and analogues	24527.9	68618.4	60239.8	73089.3	49146.4	24790.5	34258.8	32046.4	15672.5	109265	160469	103091	57330.2	59166.3	57318.2
M132T394	[M-H]-	Aspartic acid	0.564895	1.20506	0.669515	132.03	394.257	HMDB0000191	C00049	Organic acids and derivatives	Carboxylic acids and derivatives	Amino acids, peptides, and analogues	4446.55	73075.6	30575.9	33333.5	5489.82	6520.85	26890.3	26577	12684.9	48507.1	35855.8	34392.3	25923.9	26099.9	25782
M431T409	[M-H]-	Asperuloside acid	0.156471	0.632927	0.0030392	431.101	408.895			Lipids and lipid-like molecules	Prenol lipids	Terpene glycosides	1095.1	2066.03	1274.45	1568.58	1552.45	1532.5	845.837	847.972	893.654	996.264	1156.01	1013.01	1246.29	1255.61	1255.65
M871T435	[M+HCO2]-	Astragaloside ii	0.0577357	1.11403	0.667332	871.451	434.783			Lipids and lipid-like molecules	Prenol lipids	Terpene glycosides	227.661	838.481	632.916	412.194	232.325	197.774	473.054	435.803	411.58	504.917	444.018	561.776	442.428	457.243	457.806
M829T334	[M+COOH]-	Astragaloside iv	0.0325889	1.11683	0.628935	829.476	333.889		C17799	Lipids and lipid-like molecules	Steroids and steroid derivatives	Steroidal glycosides	323.919	501.229	381.574	51.5057	323.919	343.674	320.142	314.206	286.555	561.355	403.31	265.242	329.658	342.473	329.763
M557T368	[M-H]-	Atorvastatin	0.216018	1.95876	0.244918	557.26	367.788	HMDB0005006	C06834	Organoheterocyclic compounds	Pyrroles	Substituted pyrroles	667.197	3313.53	2635.4	2205.74	899.79	749.955	1269.86	3243.45	1094.61	9544.12	2533.53	2825.83	2183.92	2085.49	2086.35
M439T370	[M-H]-	Auranticin a	0.125377	0.660196	0.0139979	439.143	369.723						1527.57	851.424	863.439	829.699	1015.97	976.27	567.419	674.478	541.107	816.882	672.513	731.284	700.43	721.375	667.364
M283T57	[M-H]-	Avocadyne	0.45504	0.967563	0.915091	283.227	56.526	HMDB0035473		Lipids and lipid-like molecules	Fatty Acyls	Fatty alcohols	16606.8	9687.66	45603.7	4951.47	31816.7	26951.3	17274	33044	15951.3	19634.2	19981.7	25333.5	23770.2	25359.4	25355.9
M187T338	[M-H]-	Azelaic acid	0.457489	0.451628	0.0634529	187.097	337.698	HMDB0000784	C08261	Lipids and lipid-like molecules	Fatty Acyls	Fatty acids and conjugates	6544.24	22357.6	13423.1	11390.6	4913.29	5444.33	5250.74	2885.47	2972.82	6941.79	4599.63	6286.76	7281.87	7386.41	7389.02
M933T435	[M+Cl]-	Bacopasaponin c	0.120547	0.63121	0.0344831	933.451	434.762			Lipids and lipid-like molecules	Prenol lipids	Triterpenoids	933.448	1373.84	1735.9	1130.72	606.952	1025.4	878.372	579.942	620.904	711.401	564.115	941.444	911.964	910.932	870.333
M249T47	[M-H]-	Benzenethiol, 4,4'-thiobis-	1.69263	0.633913	0.125424	249.006	46.717			Organosulfur compounds	Thioethers	Aryl thioethers	327091	128777	146055	93349.4	199783	150990	46516.3	119237	86534.5	94538.6	168179	148096	156241	149767	156252
M329T323_2	[M-H]-	Benzoic acid + 1o, 1meo, o-hex	0.310563	0.823398	0.562859	329.087	323.037			Phenylpropanoids and polyketides	Tannins	Hydrolyzable tannins	3823.33	19696.7	7907.56	17086.1	5707.12	4116.74	10229.3	7275.3	7705.1	7654.73	8477.85	6692.73	8640.68	9418.7	9427.96
M359T319	[M-H]-	Benzoic acid + 1o, 2meo, o-hex	0.244958	0.696132	0.42375	359.097	319.081			Phenylpropanoids and polyketides	Tannins	Hydrolyzable tannins	1010.13	8305.55	3289.28	8693.13	1628.89	1333.45	2550.45	2753.78	1901.86	4027.99	2853.53	2800.86	3781.87	3775.02	3613.35
M299T281	[M-H]-	Benzoic acid + 1o, o-hex	0.257215	0.509668	0.100284	299.076	281.376	HMDB0041271		Organic oxygen compounds	Organooxygen compounds	Carbohydrates and carbohydrate conjugates	1684.88	7265.79	3268.26	5305.08	1336.58	2429.17	1635.97	1183.18	1475.29	2316.76	2356.77	1882.75	2438.6	2481.97	2437.97
M342T161	[M-H]-	Benzoic acid, 2-[[(2z)-3-(3,4-dimethoxyphenyl)-1-oxo-2-propen-1-yl]amino]-3-hydroxy-	0.434248	0.571903	0.163403	342.117	160.795			Phenylpropanoids and polyketides	Cinnamic acids and derivatives	Cinnamic acid amides	19972.5	7148.63	2805.44	6787.64	14087.8	5996.17	4236.68	3697.81	3344.81	7119.77	6732.53	7351.43	7017.88	7121.58	7050.5
M471T22	[M-H]-	Benzoic acid, 4-[[(1r,2e,4e,6z,9z)-1-[(1s)-4-carboxy-1-hydroxybutyl]-2,4,6,9-pentadecatetraen-1-yl]thio]-	0.438272	0.535948	0.439496	471.24	22.416			Lipids and lipid-like molecules	Fatty Acyls	Fatty acids and conjugates	508.588	11198	7808.7	31679.7	886.117	451.392	2365.71	3116.45	3211.55	4472.6	5630.2	9358.18	9020.46	8722.84	9003.68
M549T350	[2M-H]-	Benzoylnorecgonine	0.267785	2.38949	0.046	549.23	350.483			Benzenoids	Benzene and substituted derivatives	Benzoic acids and derivatives	749.685	1957.18	2239.3	1360.36	912.271	757.297	6933.99	2671.3	1907.86	2916.43	2049.91	2579.29	1881.83	1880.47	1403.97
M171T408	[M-H]-	Benzylphosphonic acid	0.116863	0.973342	0.922493	171.04	407.923						2372.02	1042.41	1206	851.207	1705.94	2408.02	1365.41	1186.04	3059.97	1769.04	868.231	1081.36	1529.71	1634.45	1530.6
M307T256	[M-H]-	Bestatin	0.378176	0.348476	0.297211	306.998	255.598			Organic acids and derivatives	Peptidomimetics	Hybrid peptides	627.345	23619.5	4188.65	9762.95	524.095	669.666	2844.13	354.091	494.607	7814.07	965.597	1254.73	6031.16	6265.49	6266.5
M103T386	[M-H]-	Beta-hydroxybutyrate	0.350926	1.5602	0.00581038	103.04	386.074	HMDB0000011	C01089	Organic acids and derivatives	Hydroxy acids and derivatives	Beta hydroxy acids and derivatives	5931.64	4710.28	7034.32	3286.27	3679.9	5604.91	8956.92	9439.09	6147.75	6384.97	8656.87	7606.18	5874.45	5975.11	5876.09
M564T287	[M+Cl]-	Blood group a trisaccharide	0.190809	0.696017	0.247367	564.181	287.363			Organic oxygen compounds	Organooxygen compounds	Carbohydrates and carbohydrate conjugates	2939.11	1802.17	1557.96	2129.68	3287.95	2095.9	1007.13	533.585	340.541	1968.14	3582.79	2181.73	1918.89	1913.3	1665.65
M487T359	[M-H]-	Blood group b trisaccharide	0.232983	1.19422	0.706174	487.176	358.873			Organic oxygen compounds	Organooxygen compounds	Carbohydrates and carbohydrate conjugates	4643.99	15736.3	3947.29	10664.3	1308.81	2398.27	5831.02	4147.58	7863.22	18760.4	4037.45	5575.43	5904.35	5932.02	5932.03
M361T141	[M+Cl]-	Blood group h disaccharide	0.472429	0.460411	0.0480374	361.112	140.749			Organic oxygen compounds	Organooxygen compounds	Carbohydrates and carbohydrate conjugates	9902.96	15274.6	3338.48	17767.3	6545.01	6772.27	6236.2	4169.46	4812.03	6643.52	3651.5	1928.06	8142.19	8141.43	8231.43
M275T338	[2M-H]-	Butylphosphonic acid	0.202611	0.903761	0.613428	275.103	337.692			Organic acids and derivatives	Organic phosphonic acids and derivatives	Organic phosphonic acids	9978.85	11684.8	10910.7	5555.59	8874.28	7847.67	5429.75	4674.17	5311.43	10418.5	11528.4	12210.7	8394.12	8554.07	8394.89
M357T30	[M-H]-	Cannabidiolic acid	0.178209	0.891043	0.502991	357.191	30.222		C10784	Benzenoids	Benzene and substituted derivatives	Benzoic acids and derivatives	7391.38	5771.39	4437.89	3360.73	4178.84	6873.84	2551.46	4160.67	5878.43	4834.5	6015.8	5085.06	5056.33	5225.8	5117.25
M175T410	[M-H]-	Carbamoylaspartate	0.0837068	0.900942	0.539613	175.035	410.272	HMDB0000828	C00438	Organic acids and derivatives	Carboxylic acids and derivatives	Amino acids, peptides, and analogues	2335.55	1501.81	1810.5	2115.48	1476.59	1523.22	1970.31	784.153	1246.82	1433.45	2426.28	1835.97	1810.41	1810.71	1744.07
M569T22	[M-H]-	Carbenoxolone	0.120168	1.24499	0.2037	569.349	22.444			Lipids and lipid-like molecules	Prenol lipids	Triterpenoids	1346.18	2707.54	2576.03	1996.88	1970.02	1287.01	1403.59	2900.89	3206.42	2760.28	2172.05	2351.86	2565.47	2469.19	2566.15
M447T344_1	[M-H-CO2]-	Carminic acid	0.507962	0.508573	0.0699641	447.091	343.796		C11254	Benzenoids	Anthracenes	Anthracenecarboxylic acids and derivatives	9494.05	7365.66	4799.58	16597.2	17041.5	11688.4	1882.61	2919.07	2068.03	6372.71	13328.8	7496.23	6896.46	7306.4	7316.67
M801T258	[M+Cl]-	Cauloside c	0.113267	1.51697	0.369237	801.415	257.535			Lipids and lipid-like molecules	Prenol lipids	Triterpenoids	162.379	474.817	1604.78	165.853	211.175	180.475	796.802	448.918	1051.08	380.751	648.45	920.714	781.565	781.452	768.482
M445T437	[M-H]-	Cdp-ethanolamine	0.31188	0.805475	0.419701	445.051	437.059	HMDB0001564	C00570	Nucleosides, nucleotides, and analogues	Pyrimidine nucleotides	Pyrimidine ribonucleotides	10710.8	3043.47	4096.83	2549.29	7797.08	8308.65	5399.53	4365.16	3758.09	4135.75	5729.78	6016.42	5344.68	5387.2	5387.31
M436T338	[M-H]-	Chemotatic peptide	0.145826	1.64274	0.250371	436.184	337.71		C11596	Organic acids and derivatives	Carboxylic acids and derivatives	Amino acids, peptides, and analogues	493.617	2683.34	1639.66	1353.1	493.848	535.655	2097.18	1368.88	749.068	4380.28	1930.22	1300.78	2091.81	2200.69	2217.05
M465T25_2	[M-H]-	Cholesteryl sulfate	10.9686	0.297251	0.10206	465.303	25.1	HMDB0000653	C18043	Lipids and lipid-like molecules	Steroids and steroid derivatives	Cholestane steroids	6.29703e+06	303196	1.13852e+06	172480	4.32686e+06	6.7854e+06	1.0217e+06	1.39713e+06	456054	906502	958223	915132	2.59062e+06	2.47833e+06	2.59e+06
M606T254	[M-H]-	Chymostatin	0.0863301	1.09267	0.778043	606.288	254.326		C11308	Organic acids and derivatives	Carboxylic acids and derivatives	Amino acids, peptides, and analogues	371.448	1327.09	1051.44	1447.66	270.879	252.435	876.001	623.121	540.43	1189.52	1176.62	752.743	810.824	712.532	715.471
M253T72	(M-H)-	cis-9-Palmitoleic acid	1.74567	0.468714	0.188269	253.216	71.648	HMDB0003229	C08362	Lipids and lipid-like molecules	Fatty Acyls	Fatty acids and conjugates	34727.6	282678	298291	267086	23983.3	35406.7	50603.9	12769.5	49477.7	110498	90309.8	127951	134257	135710	134780
M141T334	[M-H]-	Cis,cis-muconic acid	0.587044	0.829469	0.0276864	141.016	333.899	HMDB0006331	C02480	Lipids and lipid-like molecules	Fatty Acyls	Fatty acids and conjugates	48464	41872.7	42752.8	45596.4	50354	46644.5	47335.7	30225.6	35193.3	33351.3	37663.8	44902	39959.9	42076.1	39961.4
M191T459	[M-H]-	Citrate	4.01934	0.849771	0.175249	191.021	458.992	HMDB0000094	C00158	Organic acids and derivatives	Carboxylic acids and derivatives	Tricarboxylic acids and derivatives	1.82692e+06	1.55758e+06	1.22625e+06	1.56114e+06	2.23168e+06	2.23614e+06	1.65392e+06	1.60506e+06	1.44302e+06	1.2484e+06	1.74169e+06	1.34923e+06	1.61885e+06	1.71711e+06	1.71947e+06
M531T490_2	[M-H]-	Cochlioquinone a	0.119341	1.86369	0.00202345	531.276	490.396						201.802	501.636	473.824	375.132	174.508	200.139	600.273	657.397	496.005	570.251	698.821	568.664	469.473	487.76	487.871
M633T392	[M-H]-	Corilagin	0.0886347	0.618256	0.0197332	633.085	391.929	HMDB0031457	C10219	Phenylpropanoids and polyketides	Tannins	Hydrolyzable tannins	484.324	833.787	408.426	523.217	446.351	392.722	374.422	275.366	240.161	284.088	367.197	368.45	399.36	399.557	406.265
M425T126	(M+Na-2H)-	Cortisol 21-acetate	0.444133	0.607087	0.143585	425.193	125.515						12077	12643.3	6465.79	12669	10817.3	8875.43	782.932	1413.42	1579.74	9349.53	14613	10840.4	8387.78	8383.22	8296.24
M130T374	[M-H]-	Creatine	0.0647839	0.901421	0.406374	130.05	373.541	HMDB0000064	C00300	Organic acids and derivatives	Carboxylic acids and derivatives	Amino acids, peptides, and analogues	1359.6	2629.27	2335.34	1987.6	1708.79	1839.81	1678.31	1721.95	1253.81	2090.11	1853.81	2093.24	1320.51	1370.34	1370.65
M145T92	(M+NH4-2H)-	Cyanuric acid	0.97921	0.56857	0.306204	145.036	91.5265						70319.4	80754.2	14698.7	8083.57	21896.7	153844	22026.9	53376.2	42747.8	25537.4	23573.1	31509	30783.5	30787.3	31426.8
M540T421	(M-H)-	Cyclic adenosine diphosphate ribose	0.477981	1.33562	0.0492672	540.052	420.639						18724.6	17922.2	22169.6	6051.46	16435	16363.5	23103.6	21478.3	18146.1	19542	24431.5	23743.4	18574.5	18826	18580.6
M259T378	[M-H]-	Cyclohexane-1,2,4,5-tetracarboxylic acid	0.10735	0.652833	0.0295433	259.045	377.991			Organic acids and derivatives	Carboxylic acids and derivatives	Tetracarboxylic acids and derivatives	1024.03	1084.85	625.848	1078.87	650.531	588.557	565.161	419.687	377.039	780.387	599.785	556.501	865.726	582.992	590.674
M168T357	[M-H]-	Cysteic acid	0.457807	0.41501	0.232469	167.997	357.271	HMDB0002757	C00506	Organic acids and derivatives	Carboxylic acids and derivatives	Amino acids, peptides, and analogues	14871.4	1193.73	2313.19	764.532	4189.33	18765.6	3666.22	5425.93	2477.97	2284.09	1981.29	1635.5	3325.55	3324.62	3200.7
M304T314	[M-H]-	Cytidine 2',3'-cyclic phosphate	0.570204	0.128671	0.0879495	304.033	314.47	HMDB0011691	C02354	Nucleosides, nucleotides, and analogues	Pyrimidine nucleotides	Cyclic pyrimidine nucleotides	1270.06	20831.1	5539.66	24624.4	1391.52	2440.66	1368.04	898.103	750.915	863.227	1802.24	1535.6	5388.56	5496	5389.15
M547T432	(M+CH3COO)-	Cytidine 5'-diphosphocholine (CDP-choline)	0.142948	1.05015	0.692172	547.119	432.059	HMDB0001413	C00307	Nucleosides, nucleotides, and analogues	Pyrimidine nucleotides	Pyrimidine ribonucleotides	3248.87	1981.34	2515.48	1468.1	2543.04	2513.62	3123.16	2367.55	2458.46	1989.64	2737.62	2309.63	2385.48	2388.95	2385.48
M322T449	[M-H]-	Cytidine 5'-monophosphate	0.145286	1.13833	0.593836	322.043	448.933	HMDB0000095	C00055	Nucleosides, nucleotides, and analogues	Pyrimidine nucleotides	Pyrimidine ribonucleotides	4401.68	2518	5238.11	1847.9	3520.25	5789.25	5078.43	2894.99	1975.53	7070.97	4168.93	5351.55	4592.72	5188.31	4592.44
M322T427	(M-H)-	Cytidine 5'-monophosphate (CMP)	0.247811	0.617883	0.145479	322.043	426.603	HMDB0000095	C00055	Nucleosides, nucleotides, and analogues	Pyrimidine nucleotides	Pyrimidine ribonucleotides	2353.66	7962.29	2921.98	6684.07	2864.2	2438.98	2393.18	2432.41	2664.12	2715.17	2096.12	3285.19	3460.35	3528.4	3460.49
M613T167	[M-H]-	Cytidine monophosphate n-acetylneuraminic acid	0.497523	0.185829	0.0010622	613.138	166.692	HMDB0001176	C00128	Nucleosides, nucleotides, and analogues	Pyrimidine nucleotides	Pyrimidine nucleotide sugars	6737.62	8892.16	2163.75	8074.3	4034.77	8307.95	638.679	633.603	1063.62	2436.36	658.088	1670.27	4711.18	4737.36	5230.65
M631T434	[M+OH]-	Cytidine-5'-monophospho-n-acetylneuraminic acid	0.263936	0.217325	0.189126	631.171	434.115	HMDB0001176	C00128	Nucleosides, nucleotides, and analogues	Pyrimidine nucleotides	Pyrimidine nucleotide sugars	206.522	3917.54	1150.98	7369.32	196.734	163.866	289.966	132.976	175.062	1020.25	532.256	675.8	1425.73	1462.79	1512.9
M371T427_1	[2M-H]-	D-2-phosphoglyceric acid	0.103801	1.0511	0.685853	370.959	427.072	HMDB0003391	C00197	Organic oxygen compounds	Organooxygen compounds	Carbohydrates and carbohydrate conjugates	1774.39	1140.4	1646.8	933.995	1518.68	1317.63	1780.34	1371.22	1814	1306.13	1167.3	1318.66	1393.01	1436.99	1393.46
M161T64	(M-H2O-H)-	D-Allose	0.697692	0.325434	0.105343	161.045	63.9425	HMDB0001151	C01487	Organic oxygen compounds	Organooxygen compounds	Carbohydrates and carbohydrate conjugates	804.777	29437.1	11630.6	48456.1	12366.1	9582.74	3663.79	5511.79	5608.13	7827.84	8134.04	5793.29	12260.7	11991	12261.9
M295T288	(2M-H)-	D-Arabinono-1,4-lactone	0.203731	0.45338	0.0677906	295.06	287.549						1091.73	1106.54	605.739	1269.72	3204.93	3000.89	536.999	690.945	564.075	924.019	1031.6	912.913	727.357	757.066	726.85
M113T136	[M-H-2H2O]-	D-arabinose	0.833636	0.864586	0.724512	113.024	135.601	HMDB0029942	C00259	Organic oxygen compounds	Organooxygen compounds	Carbohydrates and carbohydrate conjugates	17290.2	29672.9	49175.7	84669.2	211556	195953	103489	120108	59309.4	48116.8	74880.2	102747	76675.1	77751.5	76648.8
M225T150	(M-H2O-H)-	D-Biotin	0.191706	0.545524	0.124479	225.066	150.084	HMDB0000030	C00120				2220.78	1328.7	469.174	3315.37	3659.76	2191.51	1363.82	2728.32	1319.2	553.294	733.998	494.254	1972.96	1419.53	1640.18
M199T440	(M-H)-	D-Erythrose 4-phosphate	0.222563	1.41248	0.0163568	199.001	440.458	HMDB0001321	C00279	Organic oxygen compounds	Organooxygen compounds	Carbohydrates and carbohydrate conjugates	2256.75	2752.11	3956.23	1880.71	2847.12	1971.33	3824.14	3703	3177.41	3034.12	4293.79	4093.03	2899.75	2930	2930.4
M191T96	(M-H2O-H)-	D-Galactarate	3.69804	0.39829	0.137076	191.019	96.418	HMDB0000639	C00879	Organic oxygen compounds	Organooxygen compounds	Carbohydrates and carbohydrate conjugates	117625	1.46473e+06	811927	933720	178997	157757	85051.9	187528	265446	280163	324524	316924	552268	561545	561547
M193T247	(M-H)-	D-galacturonic acid	0.431131	0.442289	0.0755242	193.035	247.103		C00333				3991.69	16997.7	19502.6	15229.6	7151.43	2925.08	7707.82	2757.49	1041.71	5897.61	5951.69	5745.48	11508.6	11375.8	11374.5
M209T161	[M-H]-	D-glucarate	0.665932	0.0624775	0.108648	208.985	161.117	HMDB0000663	C00818	Organic oxygen compounds	Organooxygen compounds	Carbohydrates and carbohydrate conjugates	1906.76	24666.1	1593.84	35860.1	2169.73	2730.84	393.841	394.283	391.441	1241.49	938.506	946.842	1314.3	1266.16	1341.27
M258T408	[M-H]-	D-glucosamine 1-phosphate	0.495914	2.85506	0.00742245	258.037	408.356	HMDB0001109	C06156	Organic oxygen compounds	Organooxygen compounds	Carbohydrates and carbohydrate conjugates	1745.95	5099.53	2327.33	6300.91	1693.72	2026.15	7146.75	15274.3	6561.44	12725.9	6733.1	6357.24	5610.75	5738.24	5612.96
M258T309	(M-H)-	D-Glucosamine 1-phosphate (Glucosamine-1P)	0.123622	1.32863	0.344594	258.042	308.708		C06156				1052.37	3252.77	564.888	1253.88	1266.68	1940.33	2258.01	2436.73	2210.14	2741.51	2355.17	395.734	867.614	946.287	843.362
M258T462	[M-H]-	D-glucosamine 6-phosphate	0.151627	1.52031	0.00739006	258.037	461.69	HMDB0001254	C00352	Organic oxygen compounds	Organooxygen compounds	Carbohydrates and carbohydrate conjugates	1359.04	1071.12	1158.16	1281.41	477.52	1211.26	1956.52	1784.98	1356.03	1562.12	1935.26	1376.03	1215.3	1311.78	1216.14
M131T380	[M-H-CH2O3]-	D-glucuronic acid	0.308186	1.76193	0.0481793	131.034	379.577		C00191	Organic oxygen compounds	Organooxygen compounds	Carbohydrates and carbohydrate conjugates	5075.47	1850.65	1392.76	7264.1	2555.91	5619.77	6614.87	4711.72	4099.68	9466.23	9414.92	7553.61	3304.73	3278.49	3636.53
M341T276	(M-H)-	D-Lactose	0.147791	0.808758	0.309368	341.102	276.481	HMDB0000186	C00243	Organic oxygen compounds	Organooxygen compounds	Carbohydrates and carbohydrate conjugates	3177.22	3351.76	1821.82	4471.74	2621.04	2656.45	2136.21	3983.87	1549.08	1533.52	2222.39	3213.45	2143.71	1912.57	2073.52
M131T254	(M-H2O-H)-	D-Lyxose	0.747897	0.239733	0.0896357	131.034	254.258		C00476				5593.06	41601.4	11350.7	42096.4	6164.36	4113.33	4552.45	2788.74	2461.99	5593.61	5416.21	5777.98	13062.9	13034.3	10700.2
M523T419	[2M-H]-	D-mannitol 1-phosphate	0.0979487	1.91677	0.0507076	523.105	418.702	HMDB0001530	C00644	Organic oxygen compounds	Organooxygen compounds	Carbohydrates and carbohydrate conjugates	301.626	69.97	165.59	70.3253	751.581	405.488	562.909	768.085	612.428	336.57	488.175	614.116	353.752	352.351	373.605
M114T300_2	[M-H]-	D-proline	2.1582	0.743896	0.118269	114.056	299.532	HMDB0003411	C00763	Organic acids and derivatives	Carboxylic acids and derivatives	"Amino acids, peptides, and analogues"	425684	331545	425232	190348	355350	503206	251850	241253	183232	227553	407973	348043	301805	303867	301433
M179T146	[M-H]-	D-psicose	0.785233	0.479676	0.0496396	179.055	145.566		C06468	Organic oxygen compounds	Organooxygen compounds	Carbohydrates and carbohydrate conjugates	22249.6	36564.9	13773.9	46717.9	22979.3	14907.4	5418.53	7755.47	4918.03	22783.8	17992.7	16533.2	24830.7	26632.2	24763.1
M229T430	[M-H]-	D-ribose 5-phosphate	0.395015	1.22591	0.190249	229.011	429.565		C00117	Organic oxygen compounds	Organooxygen compounds	Carbohydrates and carbohydrate conjugates	19394.3	11939	21292.7	7136.96	17715	15104.4	20638.5	18743.2	13967.9	16693.5	21759.2	21695.2	15610	16070.6	16071.8
M154T421	[M-2H]2-	D-ribulose 1,5-bisphosphate	0.0864235	1.14516	0.227977	153.991	420.742		C01182	Organic oxygen compounds	Organooxygen compounds	Carbohydrates and carbohydrate conjugates	1250.77	939.929	1320.91	645.848	886.14	948.718	1128.02	1121.69	1280.06	1209.01	1193.48	929.907	1159.89	1107.67	1159.56
M211T407	(M-H2O-H)-	D-Ribulose 5-phosphate	0.159575	0.668032	0.00373782	211	407.178	HMDB0000618	C00199	Organic oxygen compounds	Organooxygen compounds	Carbohydrates and carbohydrate conjugates	1619.45	2084.24	1556.28	2259.51	1283.77	1605.8	1146.37	1083.11	1031.5	1272.5	1240.31	1179.78	1143.34	1147.32	1280.23
M161T254	(M-H2O-H)-	D-Tagatose	1.89214	0.0974426	0.170607	161.045	253.608	HMDB0003418	C00795	Organic oxygen compounds	Organooxygen compounds	Carbohydrates and carbohydrate conjugates	4195.64	399145	35404.3	204395	5888.42	2759.13	8856.34	2833.2	2515.53	33952.7	6861.23	8492.91	50676	51070	50676.1
M330T410	[M-H]-	Damp	0.163742	1.52219	0.0174406	330.059	409.643	HMDB0000905	C00360	Nucleosides, nucleotides, and analogues	Purine nucleotides	Purine deoxyribonucleotides	1198.31	1883.58	1459.09	1149.55	1629.43	1874.46	2526.84	1762.67	1540.98	2198.06	2921.92	3045.15	1856.85	1841.71	1856.76
M417T27	[M-H-C12H16O2N]-	Dauricine	0.21922	0.633159	0.24672	417.207	27.026		C09419	Organoheterocyclic compounds	Isoquinolines and derivatives	Benzylisoquinolines	1395.29	14303.9	4160	5315.32	8732.38	4752.46	2829.46	5351.43	4804.96	3975.65	5329.37	2186.65	8615.79	8616.61	8737.5
M129T97	[M-H-C7H6O8]-	Dehydro-l-(+)-ascorbic acid dimer	1.88159	0.445272	0.145558	129.019	96.765			Organoheterocyclic compounds	Furofurans	Isosorbides	20162.3	410072	208152	264428	78012.6	65236.7	33021.6	72891.9	92364.6	80975	101103	85426.9	143720	139636	143767
M173T51	[M-H]-	Dehydroascorbic acid	2.4519	0.0600534	0.28911	173.008	51.291	HMDB0001264	C00425	Organoheterocyclic compounds	Lactones	Gamma butyrolactones	3161.58	89771.3	41610.1	889284	3597.91	3227.69	10150.2	4553.52	2020.14	4623.24	28101.4	12445.7	34709.2	35752.6	35741.1
M391T150	[M-H]-	Deoxycholic acid	0.381059	1.72996	0.155011	391.283	150.046	HMDB0000626	C04483	Lipids and lipid-like molecules	Steroids and steroid derivatives	Bile acids, alcohols and derivatives	19786.9	5642.16	12624.7	3384.82	4004.28	3108.01	10965.8	6962.74	15322.1	8352.23	24312.3	18075.9	2570.98	2923.48	3440.8
M506T482	(M-H)-	Deoxyguanosine triphosphate (dGTP)	0.18537	1.48014	0.026889	505.986	482.137	HMDB0001440	C00286	Nucleosides, nucleotides, and analogues	Purine nucleotides	Purine deoxyribonucleotides	2558.11	1042.39	2026.66	831.584	2419.2	1976.21	3229.53	2385.81	2092.79	2812.81	2613.18	2931.54	2074.21	2094.4	2094.51
M251T173	[M-H]-	Deoxyinosine	0.346877	0.453502	0.120542	251.077	173.298	HMDB0000071	C05512	Nucleosides, nucleotides, and analogues	Purine nucleosides	Purine 2'-deoxyribonucleosides	1010.19	12106.2	8098.1	10883.5	2667.77	2254	3575.06	2891.16	2243.64	3858.11	2265.69	1954.88	5273.77	5461.91	5461.92
M321T404	[M-H]-	Deoxythymidine 5'-phosphate (dTMP)	0.139004	1.23685	0.295525	321.048	403.685	HMDB0001227	C00364	Nucleosides, nucleotides, and analogues	Pyrimidine nucleotides	Pyrimidine deoxyribonucleotides	1988.07	1496.87	3550.43	989.592	2535.61	2566.34	3070.04	2417.29	1513.83	2579.37	3092.06	3563.42	2685.32	2771.19	2683.52
M686T272	(M-H)-	Dephosphocoenzyme A (Dephospho-CoA)	0.108165	0.548412	0.0361351	686.155	272.346	HMDB0001373	C00882	Nucleosides, nucleotides, and analogues	Purine nucleotides	Purine ribonucleotides	453.729	1056.07	475.274	748.034	480.733	521.349	298.245	160.49	190.076	545.475	487.093	367.046	529.701	531.189	562.668
M585T238	[M-H]-	Desferrioxamine d2	0.29957	2.93468	0.0207993	585.338	238.447						953.286	2303.15	732.534	1487.22	952.492	869.397	5814.8	1670.3	3254.11	1148.46	3561.1	5968.73	3568.4	3652.17	3570.08
M675T207	[M-H]-	Dgmg 18:3	1.56576	0.327998	0.210972	675.359	207.135			Lipids and lipid-like molecules	Glycerolipids	Glycosylglycerols	1385.15	261046	185677	135795	851.502	903.455	3680.02	1414.37	1076.93	81968.9	17585.2	86369.3	57136.6	57682.8	57134.7
M610T271	[M-H]-	Dihydroergocristine	0.0993011	1.25847	0.144717	610.318	270.813			Alkaloids and derivatives	Ergoline and derivatives	Lysergic acids and derivatives	1072.62	949.67	1281.96	1510.69	1562.39	758.293	1709.53	1359.47	1565.4	1195.9	1098.86	2050.81	1029.68	1031.13	1059.11
M127T362	[M-H]-	Dihydrothymine	0.558757	1.02125	0.837305	127.051	362.089	HMDB0000079	C00906	Organoheterocyclic compounds	Diazines	Pyrimidines and pyrimidine derivatives	89928.4	104176	145286	107925	132029	111230	126200	139136	99141.2	88655	117045	135069	109818	111468	111495
M169T424	[M-H]-	Dihydroxyacetone phosphate	0.177527	1.1396	0.17893	168.99	424.335	HMDB0001473	C00111	Organic oxygen compounds	Organooxygen compounds	Carbohydrates and carbohydrate conjugates	5041.39	3404.13	5319.44	2823.24	4054.77	4208.14	5007.46	4539.65	4662.46	4382.18	4731.79	4996.7	4268.92	4229.85	4419.76
M905T390	[M-H-H2O]-	Disialyllactose	0.0997113	0.555813	0.126568	905.275	390.205			Organic oxygen compounds	Organooxygen compounds	Carbohydrates and carbohydrate conjugates	244.047	789.813	694.967	1038.18	381.1	271.18	212.807	254.087	48.1779	583.888	348.676	452.847	571.06	571.007	556.233
M160T399	(M-H)-	DL-2-Aminoadipic acid	0.326706	0.736528	0.29641	160.061	399.389	HMDB0000510	C00956				10795.7	13208.4	5081.29	6539.65	5686.26	19794.7	10153.7	7052.08	5726.5	8088.78	8618.22	5367	7772.85	7992.56	7774.89
M89T218_2	[M-H]-	Dl-lactate	0.993661	1.37684	0.099466	89.0248	218.16		C01432	Organic acids and derivatives	Hydroxy acids and derivatives	Alpha hydroxy acids and derivatives	80074.5	100417	117856	45562.1	52750.2	80376.1	124371	98808.3	64802.5	95926.1	150959	121936	91357.6	95884.6	91361.8
M115T73	[M-H]-	Dl-malic acid	1.60304	2.01715	0.218143	115.04	72.58	HMDB0000744	C00497	Organic acids and derivatives	Hydroxy acids and derivatives	Beta hydroxy acids and derivatives	23012	120877	108995	111803	96965.8	25940.1	56480.8	61341.4	38134.8	140973	397826	288792	105183	103491	103510
M104T366	[M-H]-	DL-serine	0.340511	0.987323	0.925848	104.035	365.705	HMDB0062263	C00065	Organic acids and derivatives	Carboxylic acids and derivatives	Amino acids, peptides, and analogues	50537.7	51504.2	47279.3	47195.6	58256.4	29599.5	41619.3	36284.9	31654.7	53468.2	55349.8	62390.7	45025.3	45715.6	45020.7
M118T343	[M-H]-	DL-threonine	0.59222	0.919886	0.645937	118.051	342.899	HMDB0000167	C00188	Organic acids and derivatives	Carboxylic acids and derivatives	Amino acids, peptides, and analogues	108300	119056	126511	89064.6	96894	113409	92287.7	66393.1	50587	89351.4	161822	140459	96104.3	98060.6	96127.5
M203T248	[M-H]-	DL-tryptophan	2.26734	0.805157	0.519252	203.083	247.616	HMDB0030396	C00078	Organoheterocyclic compounds	Indoles and derivatives	Indolyl carboxylic acids and derivatives	551252	347248	573497	345017	948778	215567	270193	183237	108600	549217	614054	675160	424187	427268	424188
M180T289_2	[M-H]-	DL-tyrosine	2.89362	0.888632	0.702064	180.067	289.143	HMDB0000158	C00082	Organic acids and derivatives	Carboxylic acids and derivatives	Amino acids, peptides, and analogues	948407	460695	622850	518366	1.24009e+06	675419	488854	298821	192034	797734	1.33465e+06	856381	642129	641888	633424
M229T283	[M-H]-	Dodecanedioic acid	0.318747	0.557522	0.0239998	229.144	283.483	HMDB0000623	C02678	Lipids and lipid-like molecules	Fatty Acyls	Fatty acids and conjugates	2946.7	6352.44	8106.12	5871.66	5801.1	4455.94	2361.62	2418.89	1219.32	3412.76	5439.51	3843.81	4233.76	4291.91	4232.78
M152T318	[M-H]-	Dopamine	0.262701	0.323018	0.376571	152.047	318.488	HMDB0000073	C03758	Benzenoids	Phenols	Benzenediols	733.171	18318.5	1507.59	1511.86	504.21	1055.9	1340.14	1140.66	1173.68	1299.36	1528.9	1150.58	1251.68	1301.74	1250.34
M395T121	[M-H-C6H13NO3]-	Doxorubicin	0.727885	0.738041	0.372946	395.064	121.127	HMDB0015132	C01661				91729.9	29385.2	26693.7	39211.4	49388.1	30844.3	9071.22	23737.9	26808.3	29821.7	60974.7	46829.7	44577.6	42410.1	42405.2
M717T317	[2M-H]-	Enrofloxacin	0.193315	0.654906	0.540443	717.319	317.269	HMDB0029861		Organoheterocyclic compounds	Quinolines and derivatives	Quinoline carboxylic acids	545.68	2858.86	7596.98	1273.53	483.825	466.662	946.875	872.022	506.579	2773.38	1206.75	2355.89	1871.06	1871.01	1611.23
M495T46	[M-H]-	Enterostatin human	0.850146	0.300889	0.123831	495.275	45.731			Organic acids and derivatives	Carboxylic acids and derivatives	Amino acids, peptides, and analogues	53495.4	623.352	12328.8	448.394	28210.2	26982.3	4895.33	5200.6	564.154	5200.07	13981	6893.86	21749.4	21521.6	21748.5
M339T202	[M-H]-	Esculin	0.148004	0.872519	0.722321	339.07	201.631	HMDB0030820	C09264	Phenylpropanoids and polyketides	Coumarins and derivatives	Coumarin glycosides	1324.38	394.908	1375.81	2992.19	3657.38	1383.34	800.594	740.209	580.161	2281.06	2800.1	2507.27	1635.93	1539.3	1635.19
M633T428	[M+FA-H]-	Etoposide	0.353351	0.171765	0.152986	633.186	428.094	HMDB0014911	C01576	Lignans, neolignans and related compounds	Lignan lactones	Podophyllotoxins	407.219	6007.53	2751.38	13501.7	692.787	286.541	570.482	774.02	396.858	816.208	834.398	669.777	1157.55	1896.56	1986
M325T108	[M-H]-	Fa 18:3+3o	2.80865	0.152089	0.108351	325.201	107.539			Lipids and lipid-like molecules	Fatty Acyls	Lineolic acids and derivatives	37312.5	541547	77225.3	601002	30234.8	78732.8	14540.6	63182.1	17605.7	47383.9	27909.5	37139.6	137493	141257	137583
M299T258	[M-H]-	Farrerol	0.177643	0.616821	0.178673	299.097	257.62	HMDB0130571	C09734	Phenylpropanoids and polyketides	Flavonoids	Flavans	2033.76	5682.94	1815.37	4235.67	4554.16	1262.49	3925.08	2575.89	2095.27	1290.08	802.578	1391.18	2328.67	2573.95	2328.73
M575T249	[M-H]-	Flavone base + 4o, c-(dehydro-dhex)-dhex	4.18398	0.0357059	0.186007	575.138	249.482	HMDB0037419		Phenylpropanoids and polyketides	Flavonoids	Flavonoid glycosides	9082.38	631562	59459.2	1.94743e+06	93462.7	21778.6	3588.8	4512.76	5984.5	26637.2	37864.7	20059.6	69805.4	69798	68898
M421T338	[M-H]-	Fludrocortisone	0.0510501	1.03632	0.833979	421.192	337.728		C07004	Lipids and lipid-like molecules	Steroids and steroid derivatives	Pregnane steroids	1256.25	1706.39	745.206	1432.74	1126.16	1236.62	766.45	1276.44	1220.98	1293.35	2022.84	1195.8	745.981	866.377	741.826
M311T231	[M-H-C3H5O2N4]-	Folate	0.414665	0.440261	0.0189032	311.114	231.16	HMDB0000121	C00504	Organic acids and derivatives	Carboxylic acids and derivatives	Amino acids, peptides, and analogues	7910.37	7024.74	13264.3	9644.53	15506.2	3372.15	4422.28	3457.69	1654.09	4412.65	5076.37	5949.55	7129.82	7127.05	6896.57
M535T206	[2M-H]-	Formononetin	0.117283	0.938974	0.831415	535.152	206.379	HMDB0005808	C00858	Phenylpropanoids and polyketides	Isoflavonoids	O-methylated isoflavonoids	3516.85	5505.07	9531.25	2947.52	3272.51	3741.42	7805.9	2702.17	2077.56	3819.36	5284.45	5085.05	4868.54	4857.7	4830.27
M164T105	[M-H]-	Formylanthranilic acid	1.77201	0.22823	0.123754	164.035	105.035	HMDB0004089	C05653	Benzenoids	Benzene and substituted derivatives	Benzoic acids and derivatives	49923.7	145520	11999.4	298938	32460.6	46151.2	14328.5	14564.9	12589.4	27904.8	18367.8	45757.3	30500.8	25544	30434.6
M562T330	[M-H]-	Fosinopril	0.163995	0.53582	0.342377	562.291	330.347	HMDB0014635	C07016	Organic acids and derivatives	Carboxylic acids and derivatives	Amino acids, peptides, and analogues	190.384	5037.64	2329	1819.73	384.988	211.625	771	1186.8	791.591	992.865	990.599	611.081	1811.28	1574.23	1798.36
M621T335	[M-H]-	Fulvestrant 9-sulfone	0.283106	2.0417	0.0252358	621.286	335.185			Lipids and lipid-like molecules	Steroids and steroid derivatives	Estrane steroids	319.458	2215.84	2931.67	3182.49	377.21	356.205	2352.02	4172.77	2758.1	3481.78	2839.88	3552.46	1959.91	2042.55	2041.47
M115T397_2	(M-H)-	Fumarate	1.54188	0.887862	0.178213	115.004	397.473	HMDB0000134	C00122	Organic acids and derivatives	Carboxylic acids and derivatives	Dicarboxylic acids and derivatives	407625	320361	316967	304213	339245	376644	314812	250152	245117	320057	383536	319809	315949	315472	308952
M702T177	[M-H-H2O]-	Fumonisin b1	0.29671	1.43344	0.131496	702.382	177.206	HMDB0034702	C19241	Organic acids and derivatives	Carboxylic acids and derivatives	Fumonisins	6756.65	1567.11	5538.24	328.899	6609.63	7723.58	6626.14	7456.67	6495.81	6851.22	6826.48	6631.21	6158.99	5622.77	6153.89
M687T356	[M-H]-	Fumonisin py4	0.183771	1.85137	0.0566191	687.353	356.129			Organic acids and derivatives	Carboxylic acids and derivatives	Hexacarboxylic acids and derivatives	302.915	1432.29	1634.69	741.875	221.21	200.585	1602.97	1996.41	1346.4	975.821	1161.21	1310.51	1040.71	1077.12	1038.81
M575T287	[2M-H]-	Fustin	3.23598	0.0512929	0.226236	575.139	287.409		C01378	Phenylpropanoids and polyketides	Flavonoids	Flavans	11111	266621	42065.4	1.33235e+06	57565	22142.7	5693.57	5002.31	6955.42	18560.7	37153.2	15466.4	75642.9	75243.6	75243.5
M855T486_1	[M+2Cl]2-	G1s neuac(2-3) a	0.0900684	1.43802	0.0801598	855.26	485.702			Organic oxygen compounds	Organooxygen compounds	Carbohydrates and carbohydrate conjugates	508.813	743.945	461.81	720.975	439.348	421.921	1103.63	839.55	320.257	819.669	947.491	710.302	528.881	565.159	552.9
M341T452	[M-H]-	Galactinol	0.821983	0.437533	0.389175	341.108	451.68	HMDB0005826	C01235	Organic oxygen compounds	Organooxygen compounds	Carbohydrates and carbohydrate conjugates	3951.29	131703	16407.2	45959.6	4575.51	2906.52	2263.07	2508.68	1877.83	31974.8	26181.5	25108.6	20278.7	20532.4	20284.3
M583T338	[M-H-CO2]-	Gambogic acid	0.205143	1.74779	0.221745	583.307	337.536		C10062	Organoheterocyclic compounds	Benzopyrans	1-benzopyrans	160.491	1658.96	3990.9	998.423	200.818	167.747	1622.57	1628.75	1147.12	3263.45	2378.33	2504.26	1553.55	1568.31	1665.62
M249T97	[M-H]-	Gamma-Glu-Cys	3.03385	0.313739	0.23431	249.047	96.796	HMDB0001049	C00669	Organic acids and derivatives	Carboxylic acids and derivatives	Amino acids, peptides, and analogues	5505.98	1.23092e+06	1391.55	1.28321e+06	1.41118e+06	8959.04	1.22289e+06	3738.34	2975.33	1507.59	1522.37	3861.89	4829.85	4449.41	4827.16
M309T368	[M-H]-	Gamma-glu-tyr	0.516434	1.12528	0.480281	309.108	368.195	HMDB0011741		Organic acids and derivatives	Carboxylic acids and derivatives	Amino acids, peptides, and analogues	47618.7	27011.4	33776.5	15290.6	34945.5	44044.7	33503.7	31653.1	30341.8	37325.8	49711	45544.9	33464.9	33798	33469.4
M277T359	(M-H)-	gamma-Glutamyl-L-methionine	0.283915	1.69092	0.26412	277.086	359.118						1156.59	6027.59	5918.72	4041.2	1035.65	951.643	3115.43	1199.16	1529.21	8791.67	8243.75	9470.49	2354.52	2231.5	2221.72
M293T338	[M-H]-	gamma-L-Glutamyl-L-phenylalanine	0.681121	0.928901	0.729335	293.114	337.692	HMDB0000594		Organic acids and derivatives	Carboxylic acids and derivatives	Amino acids, peptides, and analogues	108659	112947	110384	49765.1	95796.4	84617.1	56462	45794.2	54718.1	107754	124501	132969	88962	89704.6	88964.7
M497T273	[M-H-H2O]-	Ganoderic acid a	0.258757	1.77494	0.292865	497.27	272.749			Lipids and lipid-like molecules	Prenol lipids	Triterpenoids	709.183	3026.12	6465.52	1172.67	857.73	607.485	1493.56	2081.02	1084.67	7594.39	3521.31	7012.94	2919.53	2965	2963.82
M601T368	[M-H]-	Garcinol	0.110779	1.1533	0.693015	601.352	368.433		C09929	Lipids and lipid-like molecules	Prenol lipids	Monoterpenoids	531.587	2171.16	2399.68	1237.99	521.504	484.358	364.087	1321.09	1491.48	2379.66	935.242	1980.9	1096.24	974.775	974.253
M588T446	[M-H]-	Gdp-l-fucose	0.153934	1.35146	0.0398883	588.073	446.483	HMDB0001095	C00325	Nucleosides, nucleotides, and analogues	Purine nucleotides	Purine nucleotide sugars	2535.63	1279.34	2068.06	1066.47	1680.08	2145.07	2386.94	2374.3	2031.9	2153.32	2629.5	2985.59	1915.31	1936.96	1915
M313T432	[M-H]-	Geranyl diphosphate	0.19431	1.50674	0.0936333	313.043	432.485	HMDB0001285	C05847	Lipids and lipid-like molecules	Prenol lipids	Isoprenoid phosphates	2402.57	826.005	1261.09	1056.06	2130.53	2507.95	3639.08	3323.51	2020.48	1546.47	2978.31	1837.09	2002.4	2054.37	2054.96
M691T365	[2M-H]-	Gibberellic acid	0.147722	1.5575	0.0815048	691.278	365.202	HMDB0003559	C01699	Lipids and lipid-like molecules	Prenol lipids	Diterpenoids	407.114	1166.48	1652.81	1005.46	535.967	231.81	1221.24	1032.75	1187.42	1683.2	1185.03	1477.31	1084.86	1084.81	957.409
M829T187	[M+FA-H]-	Ginsenoside f2	0.185527	1.2032	0.223573	829.483	187.464			Lipids and lipid-like molecules	Prenol lipids	Triterpenoids	7208.37	6719.94	6815.08	4374.81	5146.86	5224.53	7417.31	7445.06	3801.79	6352.68	9692.32	7991.87	7671.99	7530.78	7671.29
M815T36	[M+FA-H]-	Ginsenoside f3	2.2923	0.0935347	0.192515	815.498	35.898			Lipids and lipid-like molecules	Prenol lipids	Triterpenoids	8732.17	178396	72512.6	629215	9150.58	17569.3	9282.65	10023.3	9316.94	22195.5	13204.9	21614.8	98107.6	93703.4	97935.7
M765T77	[M-H]-	Ginsenoside rg5	1.26596	0.696103	0.112288	765.469	76.902			Lipids and lipid-like molecules	Prenol lipids	Triterpenoids	145739	75921.8	78112.7	42606.8	120282	116502	49142.4	76135.5	57371.9	50087.8	82404.8	88015.9	77404.9	76154.6	76153.7
M683T329	[M+FA-H]-	Ginsenoside rh1	0.124319	1.2968	0.559061	683.419	329.358			Lipids and lipid-like molecules	Prenol lipids	Triterpenoids	57.9283	1540.95	1821.08	517.945	62.0658	48.8847	809.719	856.177	984.662	1005.69	718.881	875.407	806.454	807.63	684.369
M391T285	[M-H]-	Glabrol	0.242431	0.647483	0.364593	391.196	284.704			Phenylpropanoids and polyketides	Flavonoids	Flavans	849.599	5839.49	3820.3	8941.28	1519.72	1023.11	1627.51	2219.22	1315.03	3567.72	2701.3	2809.63	2895.74	3007.5	3007.78
M258T279	[M-H]-	Gln-leu	0.738796	0.842447	0.753973	258.145	278.819			Organic acids and derivatives	Carboxylic acids and derivatives	Amino acids, peptides, and analogues	1783.39	94823.3	48217	65321.4	3888.19	1788.85	17379.7	24979.2	14051.5	60088.3	26137.5	39182.4	31198	31233.8	35290.5
M260T418	[M-H]-	Glu-Asn	0.473341	1.78758	0.091906	260.088	418.139	HMDB0028814		Organic acids and derivatives	Carboxylic acids and derivatives	Amino acids, peptides, and analogues	3132.54	8606.07	17945	6867.26	4379.05	3330.8	14882.5	9514.3	7301.68	19396.5	9338.55	18686.3	7552.6	7773.79	7775.41
M259T353	[M-H]-	Glu-Leu	0.932264	1.28874	0.572329	259.129	353.005	HMDB0028823		Organic acids and derivatives	Carboxylic acids and derivatives	Amino acids, peptides, and analogues	13968.4	92105.4	134622	64258.5	16984	10784.9	45835.2	38510.3	42474.4	133405	45952.8	122617	67173.5	67150.1	66147.3
M245T370	[M-H]-	Glu-Val	0.626379	1.33958	0.320807	245.114	369.869	HMDB0028832		Organic acids and derivatives	Carboxylic acids and derivatives	Amino acids, peptides, and analogues	12313.7	38884	49120.4	24648.1	10658.4	7239.07	25283.3	26580.6	22354.5	41281.4	34401	41476.4	27519	28470.2	27523.7
M241T392	[M-H-H2O]-	Glucose 1-phosphate	0.456013	0.120295	0.182252	241.011	392.38	HMDB0001586	C00103	Organic oxygen compounds	Organooxygen compounds	Carbohydrates and carbohydrate conjugates	506.426	10768.9	899.189	21312.8	446.491	563.379	541.151	703.469	693.45	854.011	575.745	782.002	3197.52	3209.44	3197.55
M145T362_2	[M-H]-	Glutamine	1.35151	1.05238	0.637722	145.062	362.135	HMDB0000641	C00064	Organic acids and derivatives	Carboxylic acids and derivatives	Amino acids, peptides, and analogues	389395	431512	587285	442404	526088	510226	558435	638339	435263	359896	463555	582625	477058	487178	477287
M113T366	[M-H-H2O]-	Glutaric acid	0.5656	1.41232	0.392337	113.035	366.417	HMDB0000661	C00489	Organic acids and derivatives	Carboxylic acids and derivatives	Dicarboxylic acids and derivatives	11154.5	31911.1	26956.8	30763.5	21059.4	11949	14765.1	13928.8	6578.44	46964.1	66586.5	40137.7	23938.6	24219.7	24220.6
M611T485	[M-H]-	Glutathione, oxidized	0.533241	1.51829	0.193844	611.144	485.399	HMDB0003337	C00127	Organic acids and derivatives	Carboxylic acids and derivatives	Amino acids, peptides, and analogues	14247	14189.8	8973.06	11104.6	4619.04	19924.5	34719.2	16850.6	17326	5382.41	22774.3	13870.4	14906.5	14904.8	14722.6
M339T27	[M-H]-	Gly-His-Lys	2.2657	1.01199	0.943985	339.199	26.957			Organic acids and derivatives	Carboxylic acids and derivatives	Amino acids, peptides, and analogues	1.1391e+06	1.97751e+06	1.9622e+06	2.30381e+06	995576	1.15031e+06	1.14674e+06	1.60036e+06	2.1035e+06	1.83012e+06	1.42159e+06	1.54043e+06	1.55696e+06	1.58317e+06	1.58367e+06
M187T257	[M-H]-	Gly-Leu	1.06656	0.557318	0.329517	187.108	256.92	HMDB0000759	C02155	Organic acids and derivatives	Carboxylic acids and derivatives	Amino acids, peptides, and analogues	13541.6	164361	81933.5	107169	15583.2	6852.88	21829.5	15602.6	16273.9	70700.7	27047.5	65588.2	45906.8	46889.3	46879.4
M221T255	[M-H]-	Gly-Phe	0.901022	1.69073	0.292326	221.093	254.966			Organic acids and derivatives	Carboxylic acids and derivatives	Amino acids, peptides, and analogues	5076.32	42254.3	83943.1	23743.6	5857.46	5103.87	30094.4	30447.2	15718.6	89445.5	43042	71877.2	38419.6	38821	38821.1
M149T313	(M+CH3COO)-	Glyceraldehyde	0.762835	0.3802	0.016413	149.045	313.342	HMDB0001051	C02154	Organic oxygen compounds	Organooxygen compounds	Carbohydrates and carbohydrate conjugates	14526.2	30874.6	16819.8	42419.3	18322.2	12990.7	10884.8	8047.21	3313.52	10991.5	10528	7924.26	16018.4	16213.7	16019.9
M105T290	[M-H]-	Glyceric acid	0.407408	0.286625	0.163292	105.019	290.449	HMDB0031818	C00258	Organic oxygen compounds	Organooxygen compounds	Carbohydrates and carbohydrate conjugates	961.503	10046.4	3751.74	17724.3	1298.35	1360.03	1860.28	724.041	573.512	2045.4	2617.48	2251.95	3685.36	4010.3	3649.68
M200T233	[M-2H]2-	Glycine, 1,1'-(1,8-dioxo-1,8-octanediyl)bis[glycyl-	0.605026	0.561975	0.247082	200.092	233.204			Organic acids and derivatives	Carboxylic acids and derivatives	Amino acids, peptides, and analogues	23464	3540.83	2765.26	2539.84	22368.8	23226.8	9942.07	5721.2	4001.84	4936.65	9893.38	9285.79	11077	11347.1	10841.5
M464T177	(M-H)-	Glycocholic acid	0.5482	1.37008	0.0655605	464.312	177.142	HMDB0000138/HMDB0032596	C01921	Lipids and lipid-like molecules	Steroids and steroid derivatives	"Bile acids, alcohols and derivatives"	22939.4	13096.3	17226.4	7339.5	27791.2	25147.1	27148.1	30484.2	26726.8	23367.3	24951.9	22880.4	22084.5	22484.9	22500.4
M187T379	(M-H)-	Glycyl-L-leucine	0.227229	0.642035	0.115935	187.108	378.933	HMDB0000759	C02155	Organic acids and derivatives	Carboxylic acids and derivatives	"Amino acids, peptides, and analogues"	4234.13	1337.9	2313.47	1153.92	3112.55	3873.62	1573.62	1671.13	1923.02	1099.17	2426.52	1595.53	2206.06	2260.83	2206.12
M479T402	[M-H]-	Gossypin	0.0804155	0.643901	0.240132	479.103	401.605		C10051	Phenylpropanoids and polyketides	Flavonoids	Flavonoid glycosides	423.789	358.531	720.009	412.184	1478.94	424.74	501.61	306.715	314.322	487.596	327.596	520.696	618.184	623.986	618.136
M130T243	[M-H]-	Guanidinopropionic acid	0.360954	0.778542	0.553408	130.05	242.951	HMDB0013222	C03065	Organic nitrogen compounds	Organonitrogen compounds	Guanidines	3494.76	30329.5	24451.1	15045.8	5000.69	4091.59	9714.33	9252.89	4203.73	13131.7	13854.2	14005.5	12426.3	12809.2	12301.4
M344T316	[M-H]-	Guanosine 3',5'-cyclic monophosphate	0.563257	0.136535	0.10428	344.039	315.789	HMDB0001314	C00942	Nucleosides, nucleotides, and analogues	Purine nucleotides	Cyclic purine nucleotides	1840.94	24661	4427.57	21812.7	723.862	2021.94	1260.31	1232.31	661.951	1374.17	1912.1	1135.19	5366.3	5465.9	5365.99
M362T455	[M-H]-	Guanosine 5'-monophosphate	0.448475	1.69539	0.010155	362.049	454.526	HMDB0001397	C00144	Nucleosides, nucleotides, and analogues	Purine nucleotides	Purine ribonucleotides	6983.63	12174.6	8624.76	2239.89	6739.01	7033.99	11305.7	11137.3	11156	10237.9	14494.1	15920.3	9144.71	9143.25	9077.33
M604T465	[M-H]-	Guanosine diphosphate mannose	0.103859	0.652132	0.0288425	604.067	464.876	HMDB0001163	C00096	Nucleosides, nucleotides, and analogues	Purine nucleotides	Purine nucleotide sugars	842.661	446.93	391.885	444.526	714.216	776.926	392.717	313.12	419.563	413.35	391.913	428.196	435.322	477.601	438.762
M579T82_2	[M-H-H2O]-	Hematoporphyrin	1.24115	0.201895	0.267276	579.282	81.545			Organoheterocyclic compounds	Tetrapyrroles and derivatives	Porphyrins	5191.17	289473	77766.1	26596	4838.98	3478.05	3624.5	5016.33	3260.89	35409.7	11571.1	23358.1	39885.9	49809	41221.2
M301T56	(M-H)-	Hesperetin	0.348799	1.35707	0.169476	301.071	56.1355						6047.09	18883.6	14560.6	8120.8	10373.4	10625.7	9466.39	16607.5	15603.9	11906.4	23895.9	15630	13268.9	12417.9	13300.6
M777T374	[M-H]-	Heterophyllin b	0.178314	2.20237	0.0333382	777.414	374.178			Organic acids and derivatives	Carboxylic acids and derivatives	Amino acids, peptides, and analogues	69.6965	1338.69	1254.4	448.518	37.6963	85.2319	879.854	1494.56	1012.51	1305.72	1199.76	1230.6	1018.23	1018.26	1003.12
M285T192	[M-H]-	Hexadecanedioic acid	0.20366	1.33177	0.176754	285.206	192.203	HMDB0000672	C19615	Lipids and lipid-like molecules	Fatty Acyls	Fatty acids and conjugates	3870.98	3657.73	3533.05	1524.61	4146.83	6935.07	6228.46	5362.88	3460.13	5504.28	7044.69	3920.33	4363.54	4363.95	4662.13
M614T280	[M-H]-	Hexosyl lpe 16:0	0.218908	1.55012	0.226936	614.35	279.551			Organic oxygen compounds	Organooxygen compounds	Carbohydrates and carbohydrate conjugates	665.246	4503.61	3564.98	1402.8	753.831	169.862	3619.28	3644.96	1963.62	2296.98	2225.27	3394.7	2370.45	2401.73	2362.87
M178T183	[M-H]-	Hippuric acid	0.926488	0.13817	0.0352118	178.05	182.73	HMDB0000714	C01586	Benzenoids	Benzene and substituted derivatives	Benzoic acids and derivatives	43558.9	5353.73	5700.07	3859.46	26906	31579.2	1240.59	1921.3	633.335	4571.77	3166.35	4626.64	9876.23	10045.9	9882.91
M211T369	[M-H]-	His-Gly	0.24107	2.09673	0.000224381	211.083	368.611			Organic acids and derivatives	Carboxylic acids and derivatives	Amino acids, peptides, and analogues	718.591	1225.29	1739.9	1085.05	985.922	934.359	2367.85	2345.94	1768.81	3024.63	2204.71	2313.31	1494.52	1494.11	1437.99
M282T250_2	[M-H]-	His-Lys	0.92166	0.639385	0.120745	282.083	250.28	HMDB0000133	C00387				40619.4	127082	76729.8	88330.6	41362.1	40335	54469.5	46811	32941.5	38972.2	44974.3	46830.6	57649.6	58296.3	57653.3
M241T97	[M-H]-	His-ser	3.91437	0.0397293	0.104321	241.082	97.3465	HMDB0000273	C00214	Nucleosides, nucleotides, and analogues	Pyrimidine nucleosides	Pyrimidine 2'-deoxyribonucleosides	12233.4	915467	238907	1.2181e+06	20644.1	11512.8	23219.4	26173.3	7774.02	19198.8	8802.47	10852.3	215426	219421	215219
M205T450	[M-H]-	Homocitrate	0.748494	0.810692	0.252149	205.035	449.718	HMDB0003518	C01251	Organic acids and derivatives	Carboxylic acids and derivatives	Tricarboxylic acids and derivatives	70981.2	32968.6	31281.2	33065.9	44221.9	54461.6	44336	34861.9	33293	27319.2	42674	33954.9	38869.5	39545.7	38900.7
M134T81	[M-H]-	Homocysteine	0.92469	0.816766	0.426641	134.024	80.555		C00155				87692	193675	39617.2	144530	78989.8	99708.7	86381	96843.9	77357.7	82491.1	123093	60004.9	45917	39381.2	39356.4
M149T173	[M-H-H2O]-	Homogentisic acid	0.509448	0.529242	0.00369398	149.045	173.407	HMDB0000130	C00544	Benzenoids	Benzene and substituted derivatives	Phenylacetic acids	12844.8	17919.3	8695.19	13572.4	8150.34	13196.1	6799.12	7779.49	6121.74	4530.08	7861.48	6272.09	16048.2	15960.1	15960
M181T199	[M-H]-	Homovanillic acid	0.636705	2.37601	0.0301364	181.05	198.592	HMDB0000118	C05582	Benzenoids	Phenols	Methoxyphenols	11445	5620.59	4136.69	3327.48	6535.73	7863.7	19008.6	21396.2	24808.7	4091.12	15955.9	7235.37	7826.62	7815.56	7619.39
M325T27	[M-H]-	Hydroquinidine	1.76222	0.988045	0.946891	325.184	27.022		C10696				961522	1.67799e+06	1.49367e+06	1.71393e+06	742728	871831	746931	1.17414e+06	1.60194e+06	1.42272e+06	1.02916e+06	1.39757e+06	1.23941e+06	1.24855e+06	1.24861e+06
M182T336	M-	Hydroxyphenyllactic acid	0.0995931	1.016	0.933531	182.056	335.993	HMDB0000755	C03672	Phenylpropanoids and polyketides	Phenylpropanoic acids		1252.53	1020.66	733.924	589.521	1548.45	1737.7	1236.16	1655.82	1142.47	1095.45	963.157	899.838	1199.8	1179.63	1173.27
M323T28	[M-H]-	Hymeglusin	0.218175	0.876231	0.141375	323.167	28.15			Lipids and lipid-like molecules	Fatty Acyls	Fatty acids and conjugates	12289.9	14043.7	11648.1	15060.3	11614	10793.5	8341.38	10300	13238.5	10396.7	12423.3	11411.5	11433.7	11458.1	11748.9
M545T230	[M-H]-	Hypocrellin a	0.45195	0.348046	0.0336201	545.128	230.124						3493.63	10360.2	4908.68	17869.7	7454.95	5763.16	5270.95	2212.38	2161.81	3100.41	1873.79	2730.86	3884.67	3752.25	4356.49
M229T189	[M-H]-	Ile-Val	1.23481	0.716393	0.526351	229.155	189.166			Organic acids and derivatives	Carboxylic acids and derivatives	Amino acids, peptides, and analogues	15534.6	165327	117034	238258	25022	4928.39	44312.2	48826.3	47751.2	122007	59194.8	83461.6	65958.3	68033.1	65974.7
M492T266	[M-H]-	Imatinib	0.335843	0.678414	0.485251	492.245	265.976	HMDB0014757		Benzenoids	Benzene and substituted derivatives	Anilides	1038.97	20835.8	9290.6	12212	1474.15	813.941	4194.76	4730.28	2979.06	8179.87	4705.71	6190.4	4721.71	4719.22	4308.71
M116T248	[M-H]-	Indole	0.374637	0.800606	0.421386	116.05	247.616	HMDB0000738	C00463	Organoheterocyclic compounds	Indoles and derivatives	Indoles	15965.6	12058.8	17952.3	12742.9	25322.7	7503.47	8419.78	6844.08	4177.96	16662.4	18242.2	18945.6	13449.9	13506.5	13506.5
M158T186	[M-H-CO2]-	Indole-3-butyric acid	0.48947	0.570709	0.174302	158.082	185.957	HMDB0002096	C11284	Organoheterocyclic compounds	Indoles and derivatives	Indoles	22758.9	8363.81	8177.3	5349.47	27234.9	8731.79	7578.41	2292.98	11714.1	8425.09	6921.21	9076.57	9331.89	9407.1	9331.96
M160T190	(M-H)-	Indole-3-carboxylic acid	0.622935	0.404905	0.255245	160.04	189.764	HMDB0003320	C19837	Organoheterocyclic compounds	Indoles and derivatives	Indolecarboxylic acids and derivatives	21324.3	3015.18	7643.81	4304.45	6112.02	52044.2	6173.81	8049.57	5933.02	4477.8	6653.69	6952.9	6557.67	6556.69	6365.57
M212T28	[M-H]-	Indoxyl sulfate	0.454625	0.763669	0.628206	212.001	28.247	HMDB0000682		Organic acids and derivatives	Organic sulfuric acids and derivatives	Arylsulfates	9733.35	19577.4	15900.8	10160.2	12377.8	81616.8	12910.4	19370.8	9347.87	27390	20871.9	24175.4	22255	22578.7	22241.8
M267T206	[M-H]-	Inosine	1.06633	0.922442	0.741247	267.074	206.398	HMDB0000195	C00294	Nucleosides, nucleotides, and analogues	Purine nucleosides		210253	289917	443439	170039	162868	234917	390467	216495	145284	130009	264282	247673	247149	254463	247157
M347T437	(M-H)-	Inosine 5'-monophosphate (IMP)	0.308724	1.04634	0.891136	347.039	437.063	HMDB0000175	C00130	Nucleosides, nucleotides, and analogues	Purine nucleotides	Purine ribonucleotides	8252.86	2490.44	17470.6	774.214	10104.9	13637.6	10430.3	11379.7	6365.14	4299.78	11562.9	11136.5	6899.17	6901.19	7250.32
M146T362_1	[M-H]-	Isatin	0.0996601	0.778469	0.251911	146.017	362.3	HMDB0061933	C11129	Organoheterocyclic compounds	Indoles and derivatives	Indolines	2181.63	4370.95	3473.98	3497.67	4554.18	985.47	2297.94	2264.45	2205.32	3165.36	2697.92	2209.65	2824.57	2858.53	2858.9
M373T130	[M-H-H2O]-	Isodeoxycholic acid	0.897446	0.173263	0.0610018	373.257	129.847	HMDB0002536	C17661	Lipids and lipid-like molecules	Steroids and steroid derivatives	Bile acids, alcohols and derivatives	14489.1	7863.63	8344.47	6978.91	59395.9	41430.5	5887.52	5655.14	4813	2780.5	3563.32	1297.89	14076.7	14087.1	14719.6
M217T30	[M+Cl]-	Isoevernic acid	0.95015	1.99456	0.0411139	217.017	29.572			Benzenoids	Benzene and substituted derivatives	Benzoic acids and derivatives	18571.3	38346.4	44900.4	4922.53	19473.1	19178.5	26514.8	29528.7	37665.7	53858	65168.4	77257.9	39676.3	40284	39678.8
M227T405	[M-H-H2O]-	Isopentenyl pyrophosphate	0.239617	1.49053	0.000189775	226.995	404.658	HMDB0001347	C00129	Lipids and lipid-like molecules	Prenol lipids	Isoprenoid phosphates	2299.5	2396.88	3027.1	2469.11	2041.76	2085.64	3240.81	3741.72	3096.63	3493.47	4045.32	3726.43	2718.41	2742.4	2718.58
M623T281	[M-H]-	Isorhamnetin-3-o-rutinoside	0.222786	0.464243	0.00615875	623.16	281.439			Phenylpropanoids and polyketides	Flavonoids	Flavonoid glycosides	1607.6	1781.73	971.075	2424.28	2331.94	1992.59	433.847	471.384	436.828	1416.49	1219.14	1179.68	1542.13	1598.76	1598.67
M707T404	[M-H]-	Jasplakinolide	0.145289	1.13013	0.856453	707.227	404.434		C16883	Organic acids and derivatives	Peptidomimetics	Hybrid peptides	2317.89	1153.15	2146.72	2394.54	934.695	7640.72	3220.78	11147	1981.17	347.023	868.755	1181.55	2605.1	2548.17	2491.31
M613T251	[M+Cl]-	Kaempferitrin	0.272749	0.111645	0.0212965	613.128	250.729	HMDB0037438	C16981	Phenylpropanoids and polyketides	Flavonoids	Flavonoid glycosides	511.886	2930.54	894.453	4229.95	5276.66	1064.68	228.804	49.2319	540.141	98.3755	398.361	349.507	860.065	976.886	969.966
M593T249	[M-H]-	Kaempferol-7-o-neohesperidoside	2.37556	0.0288867	0.250637	593.149	248.978			Phenylpropanoids and polyketides	Flavonoids	Flavonoid glycosides	8371.82	107706	13030.7	760210	17554.9	14669.9	2410.04	2348.26	2159.95	5892.16	7983.74	5826.18	16794.9	16788.9	16463.3
M485T28	[M-H]-	Kendomycin	0.891197	0.37423	0.00366463	485.277	27.636						23279.6	35183.1	30986	46740.7	25109.9	14971.7	6517.31	10977.3	8726.63	19849.6	8064.44	11830.7	80377.2	80378.7	82826.2
M507T315	[2M-H]-	Ketoprofen	0.715913	0.177327	0.189314	507.191	315.149	HMDB0015144	C01716	Benzenoids	Benzene and substituted derivatives	Benzophenones	631.641	33487.1	4222.96	49531	789.822	656.501	2100.65	2364.74	1674.86	4047.49	2371.87	3279.08	3388.55	3427.61	3427.53
M529T264	[M-H]-	Kukoamine a	0.308894	2.01273	0.03951	529.297	264.04	HMDB0030392		Benzenoids	Phenols	Benzenediols	1094.96	3585.85	4852.22	1818.16	906.179	758.343	3589.52	3174.17	3162.5	5761.85	6801.45	3707.68	3670.54	3264.96	3260.12
M217T261	[M-H]-	L-abrine	1.14575	0.965544	0.952357	217.119	260.728		C02983	Organic acids and derivatives	Carboxylic acids and derivatives	Amino acids, peptides, and analogues	4291.93	217957	149746	134343	8029.64	2385.7	35340.1	33041.2	20115.3	204470	67220.6	138761	90367.9	91588.9	90371.1
M455T345	[M-H]-	L-alaninamide, n-[2-[2-(hydroxyamino)-2-oxoethyl]-4-methyl-1-oxopentyl]-3-(2-naphthalenyl)-l-alanyl-	0.310965	2.51198	0.0114244	455.224	345.116			Organic acids and derivatives	Carboxylic acids and derivatives	Amino acids, peptides, and analogues	705.537	2801.83	2464.64	1459.48	725.273	641.165	2495.93	3864.49	1948.65	3977.61	6193.74	3619.79	2164.35	2165.84	2360.7
M88T394	(M-H)-	L-Alanine	0.199544	1.19908	0.621177	88.04	394.311	HMDB0000161	C00041	Organic acids and derivatives	Carboxylic acids and derivatives	"Amino acids, peptides, and analogues"	996.359	8956.88	4524.53	4633.53	1196.95	1335.55	3734.41	3683.25	2066.53	6396.85	5173.26	4898.26	3591.44	3671.09	3590.87
M149T47	(M-H)-	L-Arabinose	0.307492	0.899511	0.887608	149.043	47.381	HMDB0000646	C00259/C11476	Organic oxygen compounds	Organooxygen compounds	Carbohydrates and carbohydrate conjugates	11003.7	84834	5538.91	4879.82	9491.76	5617.83	1405.49	17512.8	13858	28607.2	10045.8	37740.8	16322.2	12629.6	11718.4
M132T317	(M-H)-	L-Aspartate	0.12794	0.527457	0.00167919	132.03	316.695	HMDB0000191	C00049	Organic acids and derivatives	Carboxylic acids and derivatives	"Amino acids, peptides, and analogues"	640.404	741.405	659.628	872.671	701.877	1049.43	435.362	338.293	163.36	564.829	500.32	458.641	592.66	629.952	630.578
M157T177	[M-H]-	L-dihydroorotate	0.895834	1.00789	0.976957	157.036	177.142	HMDB0003349	C00337	Organic acids and derivatives	Carboxylic acids and derivatives	Amino acids, peptides, and analogues	97139.8	37161	58743.5	29648.9	75899	164511	77390.2	91097.7	86578.5	73015.7	65720.1	72953.4	76716.6	78970.1	76730
M165T185	[M-H]-	L-fucitol	0.956557	0.318723	2.98249e-05	165.076	185.16			Organic oxygen compounds	Organooxygen compounds	Carbohydrates and carbohydrate conjugates	28336.2	24705.4	20414.1	28742.9	38954.5	27095.8	9839.07	6063.38	8960.73	8955.43	12284.5	7521.73	17961.9	17955.6	17711.8
M327T347	[2M-H]-	L-fucose	0.466319	0.389826	0.265153	327.128	347.359	HMDB0062489	C01019	Organic oxygen compounds	Organooxygen compounds	Carbohydrates and carbohydrate conjugates	1762.98	13071.7	4185.65	26632.2	2230.28	1151.23	1180.21	1470.19	773.083	6314.74	5671.42	3705.12	5647.71	5734.26	5648.32
M241T352	(M+CH3COO)-	L-Iditol	0.102032	1.21742	0.252462	241.093	352.277	HMDB0011632	C01507	Organic oxygen compounds	Organooxygen compounds	Carbohydrates and carbohydrate conjugates	1743.54	1488.38	1724.23	1138.95	1851.71	2914.69	1470.19	2472.56	1682.26	2848.75	2431.47	2317.81	1717.21	1735.69	1717.27
M207T251	(M-H)-	L-Kynurenine	0.410546	0.621486	0.152525	207.077	250.785	HMDB0000684	C00328	Organic oxygen compounds	Organooxygen compounds	Carbonyl compounds	16259.5	15523.9	7890.7	10688.5	9263.15	8164.21	2874.13	1461.32	1672.25	10692.3	14348.8	11081.7	10831.3	11143.8	10832.8
M130T307	(M-H)-	L-Leucine	0.452717	2.41024	0.326863	130.087	306.608	HMDB0000687	C00123	Organic acids and derivatives	Carboxylic acids and derivatives	"Amino acids, peptides, and analogues"	5772.88	8541.51	12222.7	9254.77	7536.9	2866.1	7105.85	7036.96	5473.56	8501.54	70575	12647.6	7997.03	7993.7	7484.98
M145T509	(M-H)-	L-Lysine	1.84615	0.809109	0.147979	145.099	509.463	HMDB0000182	C00047	Organic acids and derivatives	Carboxylic acids and derivatives	"Amino acids, peptides, and analogues"	329235	372113	377159	335685	456150	361250	238065	206766	199308	325863	423341	412258	336334	340999	336240
M133T481	(M-H)-	L-Malic acid	0.553038	0.907376	0.653185	133.014	481.44	HMDB0000156	C00149	Organic acids and derivatives	Hydroxy acids and derivatives	Beta hydroxy acids and derivatives	56271.4	54378.3	22356.6	25508.5	48365.1	26382.6	44960.1	34278	39548.9	28614.4	46194.9	18060.4	44143.8	47076.4	47112.3
M164T290	(M-H)-	L-Phenylalanine	1.55733	0.723625	0.312939	164.071	289.973	HMDB0000159	C00079	Organic acids and derivatives	Carboxylic acids and derivatives	"Amino acids, peptides, and analogues"	195759	199016	249801	135555	371313	110815	87080.8	49525.2	72803.6	205283	206201	292508	173348	179312	188435
M179T188	[M-H]-	L-sorbose	0.600219	0.205136	0.0399987	179.055	187.701		C00247	Organic oxygen compounds	Organooxygen compounds	Carbohydrates and carbohydrate conjugates	7167.06	18545.3	4097.02	24922.2	4958.98	4836.13	1341.46	3340.31	950.84	3473.43	2884.82	1245.91	4430.05	4445.41	4305.32
M135T324	[M-H]-	L-threonate	1.37687	0.646056	0.164448	135.03	323.52	HMDB0000943	C01620	Organic oxygen compounds	Organooxygen compounds	Carbohydrates and carbohydrate conjugates	84340.4	258091	153786	227262	67508.5	82882.4	97767	78398.1	61411	97628.6	120102	109262	193278	193230	190914
M327T23	[M-H]-	Labetalol	0.33734	1.00785	0.961497	327.162	23.32	HMDB0014736	C07063	Benzenoids	Benzene and substituted derivatives	Benzoic acids and derivatives	37978.6	19501.7	18120.4	19790.4	16600.2	22919.1	16689	22030.3	28142.4	24834.9	21848.8	22424.3	22588.3	21853.1	21863.3
M647T420	[M-H-H2O]-	Laminaritetraose	0.302068	0.188453	0.123032	647.202	420.355			Organic oxygen compounds	Organooxygen compounds	Carbohydrates and carbohydrate conjugates	392.484	5659.59	1900.33	8193.37	558.861	257.341	446.052	365.589	159.813	714.449	722.019	788.619	2597.53	2593.81	1985.51
M571T365	[M-H-H2O]-	Lasalocid	0.0981513	1.04579	0.916718	571.344	365.265			Lipids and lipid-like molecules	Prenol lipids	Terpene glycosides	243.263	1755.65	2088.85	1143.94	199.152	196.893	789.205	373.822	911.481	755.669	1263.32	1791.95	865.994	997.355	873.328
M167T196	[M-H-C8H6O3]-	Lecanoric acid	0.172324	0.838149	0.0959239	167.034	195.722		C02868				5788.76	6253.12	6451.93	3933.25	5861.58	4084.24	4114.12	3979.78	4783.58	4720.61	4730.66	4804.55	4454.23	4657.57	4456.47
M539T28	[M-H]-	Leptomycin b	0.564845	0.546865	0.246365	539.338	28.1275			Lipids and lipid-like molecules	Fatty Acyls	Fatty acids and conjugates	25889.7	1264.75	4801.96	3804.47	15516.2	22443.8	2911	13543.4	7057.45	5321	5438.25	6044.31	8010.84	7507.25	8013.9
M245T348	[M-H]-	Leu-Asp	0.352919	0.285609	0.187775	245.114	347.884			Organic acids and derivatives	Carboxylic acids and derivatives	Amino acids, peptides, and analogues	353.02	13338.5	1576.52	9539.09	1743.35	437.335	758.654	1095.6	883.712	2342.88	1258.72	1368.4	2963.16	2333.07	2252.81
M130T252	[M-H]-	Leucine	3.35378	1.15087	0.629122	130.088	252.251	HMDB0000687	C00123	Organic acids and derivatives	Carboxylic acids and derivatives	Amino acids, peptides, and analogues	1.2144e+06	1.97473e+06	3.77268e+06	1.91281e+06	2.54255e+06	389005	2.11109e+06	1.64148e+06	915216	2.66128e+06	2.88782e+06	3.37052e+06	2.06998e+06	2.12504e+06	2.07039e+06
M495T23	[M-H]-	Leukotriene d4	0.293341	1.62131	0.193756	495.239	22.54	HMDB0003080	C05951	Lipids and lipid-like molecules	Fatty Acyls	Eicosanoids	2444.37	4783.53	3782.74	8248.96	525.264	718.313	5020.93	6508.77	4299.61	3858.26	3687.22	9867.29	4235.89	4236.18	4179.71
M821T333	[M-H]-	Licoricesaponin h2	0.11366	1.72042	0.0632545	821.412	332.899			Lipids and lipid-like molecules	Prenol lipids	Terpene glycosides	658.136	491.731	865.612	192.506	658.136	55.5454	765.485	956.919	722.428	874.309	1264.03	443.332	568.58	573.47	573.439
M723T487	[M-H]-	Ligustroflavone	0.25503	0.30151	0.000800066	723.219	486.849			Phenylpropanoids and polyketides	Flavonoids	Flavonoid glycosides	1950.38	1944.01	1131.18	2532.83	2924.98	1447.87	371.214	347.058	361.309	828.247	975.235	714.331	1275.34	1272.07	1193.42
M493T274	[M-H-CO2]-	Lithospermic acid	0.0782506	0.999759	0.999257	493.117	274.123		C08745				629.661	1004.68	920.517	1689.38	1160.06	839.193	474.129	929.69	500.049	1573.35	1752.69	1012.08	1040.69	1140.83	1141.25
M627T340	[2M-H]-	Loxistatin acid	0.231681	2.96187	0.00252152	627.382	339.59			Organic acids and derivatives	Carboxylic acids and derivatives	Amino acids, peptides, and analogues	39.2448	1152.36	1133.01	398.182	42.3268	1500.27	2648.75	1936.6	1369.87	2905.34	2053.88	1719.08	1413.43	1410.23	1517.81
M629T397	[M-H]1-	Ltc4-[d5]	0.156292	0.816653	0.681749	629.322	397.477	HMDB0001198	C02166	Organic acids and derivatives	Carboxylic acids and derivatives	Amino acids, peptides, and analogues	389.685	5225.06	2244.23	2920.32	330.877	201.408	1315.14	1379.74	1338.95	1868.11	1672.07	1663.62	2089.28	1840.71	1863.57
M241T46_1	[M-H]-	Lumichrome	0.595386	0.64751	0.0470655	241.071	45.722		C01727	Organoheterocyclic compounds	Pteridines and derivatives	Alloxazines and isoalloxazines	31771.5	13438	19558.9	14477.4	20340	27723.9	9535.52	14030.7	14323.4	17125.9	17875.2	9543.7	21115.8	21115.9	21619.8
M464T253	[M-H]-	Luminespib	0.148652	0.777883	0.402841	464.207	252.806			Benzenoids	Benzene and substituted derivatives	Cumenes	1631.11	4711.29	5613.79	4773.71	3209.79	663.207	2133.04	2079.27	1776.58	2960.96	2953.33	4123.44	3383.58	3389.37	3700.87
M213T31	M-	m-Chlorohippuric acid	0.194824	0.920649	0.743523	213.022	30.9035						9897.18	4227.48	5193.48	5089.06	6965.19	9166.58	257.197	6098.99	9411.68	7310.83	7504.94	6738.5	6771.64	6772.26	7109.62
M609T373	[2M-H]-	M-hydroxybenzoylecgonine	0.107428	0.851372	0.26083	609.227	373.038			Benzenoids	Benzene and substituted derivatives	Benzoic acids and derivatives	1961.82	1077.51	1982.66	963.313	1728.7	1398.74	1178.88	1351.02	1493.32	1391.28	1110.99	1232.83	1005.28	1026.07	1026.26
M133T397_2	[M-H]-	Malate	3.30535	0.876862	0.129489	133.015	397.473	HMDB0000156	C00149	Organic acids and derivatives	Hydroxy acids and derivatives	Beta hydroxy acids and derivatives	1.73197e+06	1.3249e+06	1.29274e+06	1.32669e+06	1.48311e+06	1.58278e+06	1.30575e+06	1.06732e+06	1.05766e+06	1.23765e+06	1.55993e+06	1.43739e+06	1.33346e+06	1.34412e+06	1.32233e+06
M114T367_1	(M-H)-	Maleamic acid	0.396879	1.38956	0.381402	114.019	366.638						5457.64	16312.7	13582.1	15493.1	10229.8	5433.42	7211.98	7480.15	4585.33	22423.3	30625.3	20091.6	11613.6	11881.3	11923.9
M247T400	[M-H]-	Malioxamycin	0.503815	1.63654	0.112625	247.093	400.053			Organic acids and derivatives	Carboxylic acids and derivatives	Amino acids, peptides, and analogues	2239.06	14196	19678.4	8516.8	6437.72	2289.47	14293.6	14428.2	7980.61	20118.2	16678	13823.2	10304.6	9486.53	9453.17
M103T388_1	[M-H]-	Malonic acid	0.810646	0.439299	0.122957	103.003	387.798	HMDB0000691	C00383	Organic acids and derivatives	Carboxylic acids and derivatives	Dicarboxylic acids and derivatives	15877.3	31749.8	17982	72860.8	18031.5	16383.1	6942.9	5229.55	6441.88	19943.2	19797.6	17592.8	21356.8	25296	25258.4
M563T438	(M+CH3COO)-	Maltotriose	0.455688	0.769536	0.419106	563.181	438.101	HMDB0001262	C01835	Organic oxygen compounds	Organooxygen compounds	Carbohydrates and carbohydrate conjugates	15381.2	45275.6	26937.9	39857.5	14277.9	9849.79	13064.8	31320.7	14139.8	29365.7	14746.2	14009.1	20580.8	21001.2	20581.9
M825T307	[M-H]-	Medicagenic acid base + o-hex-hex	0.167515	2.51815	0.00301374	825.402	306.604	HMDB0039290		Lipids and lipid-like molecules	Prenol lipids	Terpene glycosides	134.675	644.972	907.438	232.237	131.975	291.653	735.46	930.87	901.029	1190.11	885.737	1256.68	574.203	574.662	548.715
M295T250	[M-H]-	Met-Phe	0.324379	0.479081	0.14378	295.103	249.703			Organic acids and derivatives	Carboxylic acids and derivatives	Amino acids, peptides, and analogues	4049.99	7750.99	2844.55	10836.8	3141.45	988.082	416.835	1458.14	1231.61	4151.52	4007.65	2920.69	4105.65	4105.19	4295.41
M196T344	[M-H]-	Metanephrine	0.189207	0.616396	0.412134	196.108	343.682	HMDB0004063	C05588	Benzenoids	Phenols	Methoxyphenols	743.063	2376.81	711.176	3085.78	8040.35	1640.9	719.745	1631.63	888.622	1888.05	913.988	4188.97	2768.36	1820.35	2771.71
M325T213	[M-H-C5H7O3N]-	Methopterine	0.226633	0.396559	0.0367014	325.107	213.429			Organoheterocyclic compounds	Pteridines and derivatives	Pterins and derivatives	2834.56	1439.04	1119.44	3290.21	619.233	4036.4	826.194	792.77	906.51	741.176	1128.2	894.808	912.337	968.705	968.32
M147T247	[M-H]-	Mevalonic acid	1.71349	0.784268	0.449131	147.045	246.976	HMDB0000227	C00418	Lipids and lipid-like molecules	Fatty Acyls	Fatty acids and conjugates	246442	297461	425658	245421	484554	132176	139450	102662	58820.3	341317	349432	444873	269029	268938	262648
M191T389	[M-H-H2O]-	Mucic acid	0.158397	0.817615	0.128196	191.019	388.967	HMDB0000639	C00879	Organic oxygen compounds	Organooxygen compounds	Carbohydrates and carbohydrate conjugates	3604.25	5982.29	4820.93	4426.62	3325.55	3152.44	3248.71	2955.17	3296.32	3858.12	3837.36	3499.86	3911.2	3983.65	3936.84
M440T114	[M-H]-	N-(.alpha.-linolenoyl)tyrosine	0.748108	2.04613	0.0701261	440.278	114.131			Organic acids and derivatives	Carboxylic acids and derivatives	Amino acids, peptides, and analogues	20716	9405.28	17572.5	5964.95	23473.7	15623.5	15427	20640.9	10342.4	42326.4	53769.1	47284.8	21676	22604.9	22603.3
M242T369	[M-H]-	N-acetyl-2-carboxybenzenesulfonamide	0.0848972	0.781566	0.164612	242.027	368.835			Benzenoids	Benzene and substituted derivatives	Benzenesulfonamides	1110.02	599.963	619.496	705.162	749.78	649.389	590.714	317.087	468.145	557.728	677.036	854.605	571.702	590.136	589.965
M303T436	[M-H]-	N-Acetyl-Asp-Glu	0.106282	1.20273	0.233697	303.082	436.488	HMDB0001067	C12270	Organic acids and derivatives	Carboxylic acids and derivatives	Amino acids, peptides, and analogues	1425.71	1664.86	2127.95	1324.41	1358.59	1068.27	2272.07	1121.53	1823.7	1374.73	2031.58	2164.63	1613.49	1621.79	1598.74
M222T306	[M-H]-	N-acetyl-d-galactosaminitol	0.205437	0.722982	0.00597393	222.078	306.169			Organic oxygen compounds	Organooxygen compounds	Carbohydrates and carbohydrate conjugates	4735.31	3513.48	3192.14	3367.87	2755.68	3656.76	2213.67	2665.39	2460.27	2658.19	2688.72	2656.34	2795.19	2822.3	2795.71
M300T441	[M-H]-	N-acetyl-d-glucosamine 6-phosphate	0.815023	1.63216	0.0268863	300.048	440.771	HMDB0001062	C00357	Organic oxygen compounds	Organooxygen compounds	Carbohydrates and carbohydrate conjugates	18269.7	30755.2	43691.9	14592.3	15171.4	15228	42675.7	36918.8	27839.9	31751.4	39047.3	46529.5	29038.6	29448.1	29042.4
M383T249	M-	N-Acetyl-D-lactosamine	1.16332	0.182232	0.149819	383.144	248.648						2528.33	112120	24874.7	104000	3589.07	1210.41	5761.91	1047.81	1282.66	24334.2	5260.74	7565.02	35307.8	35745.9	35304.5
M130T335	(M-H)-	N-Acetyl-L-alanine	0.222206	0.696228	0.0158899	130.05	334.534	HMDB0000766		Organic acids and derivatives	Carboxylic acids and derivatives	"Amino acids, peptides, and analogues"	3737.82	4765.23	3457.35	3345.19	3460.98	5168.31	3468.64	2977.03	2013.38	1877.8	3209.93	3117.36	3454.91	3355.39	3349.74
M174T387	[M-H]-	N-acetyl-l-aspartic acid	0.4791	1.61058	0.0370087	174.04	387.217	HMDB0000812	C01042	Organic acids and derivatives	Carboxylic acids and derivatives	Amino acids, peptides, and analogues	5871.32	11309.6	15653.4	6761.8	4727.52	2962.15	12941.2	10644.9	12789.5	13407.6	11912.1	14462	10461.7	10856.9	10862.2
M188T381	[M-H]-	N-acetyl-l-glutamate	0.514061	1.62381	0.0685371	188.056	380.936	HMDB0001138	C00624	Organic acids and derivatives	Carboxylic acids and derivatives	Amino acids, peptides, and analogues	4874.62	13651.4	18323.4	8484.9	4246.8	2494.57	14368.9	11698.7	12826.7	13032.6	15189.2	17444.7	10512.9	10512	10400.7
M190T190	[M-H]-	N-acetyl-l-methionine	0.65459	2.21156	0.0744959	190.053	190.383	HMDB0011745	C02712	Organic acids and derivatives	Carboxylic acids and derivatives	Amino acids, peptides, and analogues	1335.27	22070.9	21387.2	5776.16	393.856	1743.44	17866.2	10441.3	9180.6	25429.3	28191	25455.7	10045.9	10114.8	10094.5
M206T171	(M-H)-	N-Acetyl-L-phenylalanine	0.330101	0.722825	0.346628	206.081	170.759	HMDB0000512	C03519	Organic acids and derivatives	Carboxylic acids and derivatives	"Amino acids, peptides, and analogues"	13960.3	6994.13	10317.4	3859.54	13186.9	4157.97	3393.35	2995.6	1750.98	8359.07	10532.9	10899.3	7212.01	7312.33	7348.6
M445T286	[2M-H]-	N-acetyl-l-tyrosine	0.159692	1.56171	0.00929969	445.182	286.121	HMDB0000866	C01657	Organic acids and derivatives	Carboxylic acids and derivatives	Amino acids, peptides, and analogues	736.726	898.484	1384.1	1394.38	1123.05	1111.65	1783.46	2306.7	1144.52	1653.5	1972.67	1522.01	1426.36	1404.64	1404.49
M733T304	[2M-H]-	N-acetyl-s-farnesyl-l-cysteine	0.247423	4.73814	0.000260819	733.424	304.106			Lipids and lipid-like molecules	Prenol lipids	Sesquiterpenoids	51.0532	542.777	765.829	219.355	388.064	49.2147	1389.84	1540.87	1141.64	1363.85	2518.18	1599.1	1100.09	1100.05	1030.56
M300T335	(M-H)-	N-Acetylglucosamine 1-phosphate	0.105409	0.813145	0.384542	300.048	335.108	HMDB0001367	C04256	Organic oxygen compounds	Organooxygen compounds	Carbohydrates and carbohydrate conjugates	1335.65	1634.03	626.083	507.419	1224.57	1836.88	1120.76	1132.98	892.902	1323.69	549.228	806.318	767.474	811.082	812.616
M220T246	(M-H)-	N-Acetylmannosamine	0.190262	1.05021	0.846791	220.082	246.316	HMDB0001129	C00645	Organic oxygen compounds	Organooxygen compounds	Carbohydrates and carbohydrate conjugates	18214.7	23539	35834.1	13612.9	18724.7	10379.7	26904.6	11414.2	12234.7	16583.2	28935.2	30274	19089.6	19099.7	16377.7
M146T291	[M-H]-	N-acetylserine	0.316355	0.696856	0.0116084	146.045	290.691	HMDB0002931		Organic acids and derivatives	Carboxylic acids and derivatives	Amino acids, peptides, and analogues	8243.22	11437.1	9835.42	8257.74	6827.23	7304	7518.81	6202.06	4818.72	6250.31	6936.29	4443.92	6627.93	6942.84	6619.91
M625T340	[2M-H]-	N-caffeoyl-o-methyltyramine	0.0852425	1.10963	0.741799	625.269	340.224			Phenylpropanoids and polyketides	Cinnamic acids and derivatives	Hydroxycinnamic acids and derivatives	347.832	2104.09	1275.67	1005.57	628.309	226.965	989.763	987.756	678.607	1441.67	1036.98	1066.29	972.885	968.624	986.473
M292T252	[M-H]-	N-fructosyl isoleucine	0.299033	1.40797	0.400846	292.129	251.885			Organic acids and derivatives	Carboxylic acids and derivatives	Amino acids, peptides, and analogues	1257.17	6598.09	10361.2	6304	1992.56	1050.58	3709.31	3887.46	2964	11378.1	6456.93	10413	5064.26	5099.8	5064.53
M173T253	[M-H]-	N-methyltryptamine	0.337075	2.01245	0.174387	173.093	253.168	HMDB0004370	C06213	Organoheterocyclic compounds	Indoles and derivatives	Tryptamines and derivatives	3693.69	3458.91	7158.02	3145.7	2027.21	1389.65	3422.42	1803.25	2085.26	12754.5	7413.61	14527.3	5865.38	5886.47	5355.04
M618T34	[M-H]-	N-palmitoyl-d-erythro-dihydroceramide-1-phosphate	0.632531	3.71083	0.0995116	618.477	34.253	HMDB0010698		Lipids and lipid-like molecules	Sphingolipids	Phosphosphingolipids	1767.23	6542.02	6197.69	748.818	3248.48	2698.58	11466.6	27236.3	30599.6	2734.76	3137.14	3505.61	7262.68	6213.2	6699.09
M513T200	[2M-H]-	N-tris(hydroxymethyl)methyl-4-aminobutanesulfonic acid	0.145549	0.704218	0.45303	513.2	200.421			Organic acids and derivatives	Organic sulfonic acids and derivatives	Organosulfonic acids and derivatives	466.755	2462.85	1794.98	3930.38	628.285	307.366	849.355	1595.19	811.972	600.532	1382.15	1514.69	1152.65	1190.58	1185.79
M231T377	[M-H]-	N.alpha.-(tert-butoxycarbonyl)-l-aspartamide	0.21211	0.712439	0.416741	231.098	376.964			Organic acids and derivatives	Carboxylic acids and derivatives	Amino acids, peptides, and analogues	1385.4	9918.16	6686.33	6426.89	1949.96	1070.97	4207.33	2006.89	1801.14	3386.22	3535.62	4610.51	4475.95	3971.94	3964.11
M173T297	(M-H)-	N2-Acetyl-L-ornithine	0.253539	1.01075	0.984314	173.092	297.11	HMDB0003357	C00437	Organic acids and derivatives	Carboxylic acids and derivatives	"Amino acids, peptides, and analogues"	1189.57	4611.46	14641.5	3172.38	569.124	2318.57	2142	2915.32	1682.41	6398.02	7279.39	6370.5	3165.79	3241.84	3169.18
M429T78	[M-H-H2O]-	Naringenin-4'-o-.beta.-d-glucuronide	3.12211	0.359547	0.24651	429.08	78.067			Phenylpropanoids and polyketides	Flavonoids	Flavonoid glycosides	144158	54948.2	117534	38997	1.16194e+06	679918	32368.7	159082	155147	65356.1	290345	87805.6	210246	201168	76432.3
M581T23	[M-H]-	Naringin dihydrochalcone	0.789652	0.0376395	0.135153	581.202	22.808			Phenylpropanoids and polyketides	Flavonoids	Flavonoid glycosides	31186.5	620.23	312.936	306.898	4602.88	48992.6	402.999	674.677	1105.42	553.312	197.337	304.085	2202.02	2102.12	2274.01
M602T286	[M-H-CH2O3]-	Natamycin	0.17031	1.38654	0.471222	602.313	286.216		C08073	Organic oxygen compounds	Organooxygen compounds	Carbohydrates and carbohydrate conjugates	50.3557	4137.43	2388.19	1522.51	133.951	50.2604	1496.85	2391.01	1190.89	2613.59	1682.97	2108.98	1928.04	2035.18	1927.31
M249T57	[M-H]-	NCGC00169093-01	0.723547	1.83314	0.409276	249.149	56.526			Lipids and lipid-like molecules	Prenol lipids	Sesquiterpenoids	12284.6	59519.3	29981.1	73279.6	54647.6	16662.5	9368.1	206114	14429.1	22271.9	186493	12963.2	54330.9	45537.5	54368.1
M193T425	[M-H-C6H7NO3]-	Nicotinate d-ribonucleotide	0.192767	0.979461	0.669904	192.988	424.529	HMDB0001132	C01185	Nucleosides, nucleotides, and analogues	Pyridine nucleotides	Nicotinic acid nucleotides	7870.57	7242.21	7213.07	5776.03	7416.18	7376.51	7050.73	7126.82	7052.88	6222.3	7159.68	7401.16	6631.02	6820.96	6822.51
M599T236	[M-H]-	Nocardamine	0.925716	1.82997	0.000530119	599.318	236.311						32271.5	20857.2	26102.5	10598.7	21845.3	34620	46089.7	47309.6	46155.3	41113.9	50017.5	37030.4	32372.2	32467.6	32373.4
M588T388_2	[M-H]-	Norbuprenorphine glucuronide	0.143011	0.976603	0.956602	588.261	388.498			Organic oxygen compounds	Organooxygen compounds	Carbohydrates and carbohydrate conjugates	527.007	4144.42	4205.6	2327.95	621.09	503.898	2837.87	3284.97	908.395	1332.13	2928.01	750.114	2363.98	2205.73	2361.23
M637T341	[2M-H]-	Norfloxacin	0.187337	1.81108	0.0168854	637.257	341.296	HMDB0015192	C06687	Organoheterocyclic compounds	Quinolines and derivatives	Quinoline carboxylic acids	584.062	1471.73	1490.17	1062.28	622.905	471.251	2048.4	2051.4	1052.01	1767.78	2184.72	1223.2	1216.09	1221.59	1215.8
M287T341	[M-H-H2O]-	O-desmethylmycophenolic acid	0.13487	0.762039	0.19863	287.114	340.864			Benzenoids	Benzene and substituted derivatives	Benzoic acids and derivatives	3295.63	1569.53	3004.19	3197.37	2620.53	1606.99	1191.46	1036.68	1864.33	2324.87	2209.44	3028.03	1891.05	1871.04	1900.1
M140T453	[M-H]-	O-phosphoethanolamine	0.296457	1.1473	0.452605	140.011	453.194	HMDB0000224	C00346	Organic acids and derivatives	Organic phosphoric acids and derivatives	Phosphate esters	13334.5	9016.92	13783.5	8204.28	21529.1	10968.8	11347	11878.1	12585	16056.1	15989	20299.6	11920.6	12107.6	12111.7
M281T68	(M-H)-	Oleic acid	1.97717	1.2021	0.426718	281.247	67.619	HMDB0000207	C00712	Lipids and lipid-like molecules	Fatty Acyls	Fatty acids and conjugates	400675	271480	365453	22585.3	356163	463501	384174	577111	365742	289348	331794	311614	365403	366086	365596
M155T134	[M-H]-	Orotate	1.63281	0.377056	0.262752	155.02	134.077	HMDB0000226	C00295	Organoheterocyclic compounds	Diazines	Pyrimidines and pyrimidine derivatives	159560	9353.92	13557.1	17435.6	55859.3	298008	16196.8	75351.6	62247	19713.1	16791.7	18503.7	38557.5	39261.2	38553.3
M567T241	[2M-H]-	Oseltamivir acid	0.366081	0.445721	0.428181	567.349	240.63			Organic acids and derivatives	Carboxylic acids and derivatives	Amino acids, peptides, and analogues	1572.8	2026.42	4347.95	27131.2	1886.49	764.043	1777.7	2574.75	1888.36	3086.69	2710.62	4778.45	3571.18	3691.22	4710.69
M297T28_2	[M-H]-	Ostruthin	0.278948	0.919701	0.651643	297.151	27.78		C09281	Lipids and lipid-like molecules	Prenol lipids	Terpene lactones	51704.6	56701.4	64842.7	74522.1	39917.2	21362.8	25997.4	51068.7	48521.7	56576	53145.9	48924.3	50177.7	50182.7	47815.6
M583T232	[M-H]-	Ouabain	0.102076	1.36081	0.267951	583.286	232.488	HMDB0015224	C01443	Lipids and lipid-like molecules	Steroids and steroid derivatives	Steroid lactones	925.431	1522.95	1619	972.903	781.61	422.531	982.304	1806.24	359.485	1451.8	2033.24	1864.42	1126.84	1191.51	1194.96
M145T362_1	(M-H)-	Oxoglutaric acid	0.446608	0.464838	0.126493	145.014	362.089						8004.32	23249.7	8293.26	16281.9	5635.22	2758.25	3032.54	2726.72	4525.87	12137.8	4114.9	3315.27	6605.83	6340.15	6602.58
M151T226	[M-H]-	Oxypurinol	0.434018	1.06548	0.771962	151.026	226.308	HMDB0000786	C07599	Organoheterocyclic compounds	Imidazopyrimidines	Purines and purine derivatives	26505	12512	15022.4	9628.03	14721.4	27005.2	29271.8	17074.5	13760.1	13930.2	21735.7	16523.4	16836.2	17437.3	17146.3
M221T343	[M-H-C4H8O4]-	Palatinose	0.302998	0.400894	0.00183195	221.065	343.408		C01742	Lipids and lipid-like molecules	Fatty Acyls	Fatty acyl glycosides	2659.1	3568.69	2298.07	4532.4	5074.8	3062.44	1566.61	1595.68	751.524	661.196	1768.98	2153.15	2352.91	2452.58	2431.65
M255T45_2	[M-H]-	Palmitic acid	6.68227	1.13468	0.208466	255.233	44.7665	HMDB0000220	C00249	Lipids and lipid-like molecules	Fatty Acyls	Fatty acids and conjugates	1.17131e+07	1.18791e+07	9.68895e+06	1.38984e+07	1.04556e+07	1.17285e+07	1.12153e+07	1.48005e+07	1.07881e+07	1.65748e+07	1.09836e+07	1.43432e+07	1.11643e+07	1.16511e+07	1.13247e+07
M218T266	[M-H]-	Pantothenate	1.1433	0.528017	0.171194	218.103	266.142	HMDB0000210	C00864	Organic oxygen compounds	Organooxygen compounds	Alcohols and polyols	53619	79047.5	77075.8	82039.7	258581	56604.9	60558.4	43977.6	34401.1	45895.2	63708	71948.6	81603.2	83561.3	81599.7
M113T77	[M-H]-	Parabanic acid	0.814172	0.601693	0.166756	112.999	77.387	HMDB0062802		Organoheterocyclic compounds	Azolines	Imidazolines	57979.4	38145.9	6964.66	48305.7	20969.5	74967.6	13156.7	37710.8	37787.2	15242.6	21856.8	23064.1	17948.1	17730.5	17727.5
M787T141	[M+CH3COOH-H]-	Pc 32:3	0.41924	0.845412	0.0834682	786.527	141.018			Lipids and lipid-like molecules	Glycerophospholipids	Glycerophosphocholines	22482	19007.6	19084.5	14332.5	24253.6	21147.4	16389.8	17066	15669.6	14390.8	19713.2	18480.1	19204	19207.7	19672.8
M815T116	[M+CH3COOH-H]-	Pc 34:3	0.846374	0.864155	0.393451	814.56	115.767			Lipids and lipid-like molecules	Glycerophospholipids	Glycerophosphocholines	80847.1	62954	60171.1	32498.2	91325.3	97964.1	69750.9	54927.9	78761.4	48838.3	55935.6	59708.4	60439	63482.9	60356.7
M813T138	[M+CH3COOH-H]-	Pc 34:4	0.492107	0.966066	0.777232	812.542	137.741			Lipids and lipid-like molecules	Glycerophospholipids	Glycerophosphocholines	37743	25563.7	35907.3	17655.6	32721.1	38099.2	32899.8	35147.4	26021.8	27613.3	32446	27192.5	30404.3	31439.2	31436.7
M837T138	[M+CH3COOH-H]-	Pc 36:6	2.91491	1.06285	0.668898	836.546	137.922			Lipids and lipid-like molecules	Glycerophospholipids	Glycerophosphocholines	1.07526e+06	686293	845928	501048	905663	1.21107e+06	1.16833e+06	991042	988769	698251	896455	810844	936727	944325	936820
M843T136	[M+Hac-H]-	Pc(16:0e/5,6-eet)	1.36683	0.746583	0.199838	842.589	136.023			Lipids and lipid-like molecules	Glycerophospholipids	Glycerophosphocholines	194276	117284	96957.9	78549.6	185291	190426	106949	65557	153580	82171.8	80518.7	155362	141972	153245	142341
M839T62	[M+Hac-H]-	Pc(16:1e/8,9-epete)	0.644313	0.905938	0.637664	838.557	62.327			Lipids and lipid-like molecules	Glycerophospholipids	Glycerophosphocholines	58822.9	52060.8	61534.4	22868.8	55191.1	92843.6	45619.5	30564.6	46582.9	50145.7	63198.2	74917.1	40583.9	46713.5	46433.2
M763T139	[M-H]-	Pe 38:6	0.52093	0.774423	0.0479645	762.505	138.546			Lipids and lipid-like molecules	Glycerophospholipids	Glycerophosphoethanolamines	26654.4	26901.2	22830.8	18433.3	33533.3	31961.8	16246	21142.6	24667.5	16933.4	22564.7	22597.3	21793.8	21793.3	21619.7
M765T138	[M-H]-	Pe(16:0e/10-hdohe)	0.396865	0.712703	0.00663475	764.52	137.869			Lipids and lipid-like molecules	Glycerophospholipids	Glycerophosphoethanolamines	14425.8	14733.2	17775.2	10784.2	14037.8	14695.5	10424.1	7429.63	13230.1	10191.4	9056.13	11282.9	13979.6	13991.5	14794.2
M842T71	[M-H]-	Pg 42:10	2.50423	0.0822979	0.170272	841.51	70.6845						16778.4	221072	87718.8	720067	19130	21803.3	10357.9	14219.8	16868.1	15830.8	14386.2	17759.5	85909.3	85998.6	91142.9
M809T321	[M-H]-	Pg(16:0/10-hdohe)	0.162797	2.84792	0.00149401	809.487	321.495			Lipids and lipid-like molecules	Glycerophospholipids	Glycerophosphoglycerols	665.593	539.131	538.335	110.868	78.2879	73.8083	880.979	1048.38	587.903	963.993	1246.06	985.669	570.308	592.574	591.956
M368T188_1	[M-H]-	Phe-Gly-Phe	0.179883	1.23014	0.651102	368.159	187.758			Organic acids and derivatives	Carboxylic acids and derivatives	Amino acids, peptides, and analogues	56.5496	4413.76	5869.41	2764.43	158.887	2382.7	954.577	1885.86	1650.72	3060.8	5988.78	5705.77	3127.24	3608.63	3617.95
M537T241	[M-H]-	Phe(benzoyl)-leu-arg	0.196117	0.938828	0.798805	537.29	240.924			Organic acids and derivatives	Carboxylic acids and derivatives	Amino acids, peptides, and analogues	10069.7	4993.5	4521.41	3598.43	7841.73	3034.85	4780.71	4575.33	2811.79	7209.04	7540.16	5059.06	5255.19	5249.32	5138.23
M93T173	[M-H]-	Phenol	0.961576	0.333983	0.0982522	93.0341	172.932	HMDB0000228	C00146	Benzenoids	Phenols	1-hydroxy-4-unsubstituted benzenoids	61606.6	9878.76	7938.75	1925.49	42856.6	35407.5	9668.3	13241.2	6688.69	7839.68	8832.55	7037.83	15328.7	15743.6	14445.1
M331T155	[M-H]-	Phenol, 5-(1,1-dimethyloctyl)-2-[(1s,3s)-3-hydroxycyclohexyl]-	0.373754	1.19425	0.409426	331.247	155.159			Benzenoids	Benzene and substituted derivatives	Cyclohexylphenols	21735.2	17604.9	26302.6	7124.28	14884.2	28653	21932.2	32282.7	14183.5	24403.1	29899.5	16195.3	17911.2	19968.7	19982.7
M164T247_2	[M-H]-	Phenylalanine	5.32316	0.756522	0.390213	164.072	247.121	HMDB0000159	C00079	Organic acids and derivatives	Carboxylic acids and derivatives	Amino acids, peptides, and analogues	2.20034e+06	2.72484e+06	4.14051e+06	2.26995e+06	4.39151e+06	1.19764e+06	1.22995e+06	938674	515083	2.96362e+06	3.20856e+06	3.94808e+06	2.37757e+06	2.40422e+06	2.37749e+06
M283T47	[M-H]-	Phenylethyl 2-glucoside	0.207425	1.1324	0.698048	283.116	47.389			Organic oxygen compounds	Organooxygen compounds	Carbohydrates and carbohydrate conjugates	11217.7	12823.3	19608.5	14045.1	2635.64	10907.9	9274.58	22188.2	13894.4	22362.7	1888.98	11061.5	14984.1	14995.9	13614.1
M461T324	[M+FA-H]-	Phenylethyl primeveroside	0.15239	0.69827	0.264608	461.15	323.589	HMDB0041274		Organic oxygen compounds	Organooxygen compounds	Carbohydrates and carbohydrate conjugates	1190.76	1819.33	1259.74	4676.43	1988.75	2028.55	1436.88	1486.67	1156.31	1023.3	1769.66	2179.24	1514.06	1515.54	1407.51
M165T115	[M-H]-	Phenyllactic acid	0.919773	0.809167	0.500473	165.055	115.069	HMDB0000779	C01479	Phenylpropanoids and polyketides	Phenylpropanoic acids		59522.3	43982.5	63656.8	43993.8	86851.5	58912.6	14965.4	17849.7	13428.2	68903.3	83915	89746.1	48512.5	48490.3	33632.1
M329T423	[M-2H]2-	Phytic acid	0.0866104	0.917757	0.52408	328.939	422.592	HMDB0003502	C01204	Organic oxygen compounds	Organooxygen compounds	Alcohols and polyols	1103.83	1101.02	718.516	1115.22	1485.77	1234.78	1266.97	959.301	1387.83	940.358	843.105	805.675	987.625	987.621	993.129
M858T186	[M-H]-	Pi 36:4	0.500922	0.778702	0.0130281	857.515	186.074			Lipids and lipid-like molecules	Glycerophospholipids	Glycerophosphoinositols	27606.9	21178.1	22179.5	19402.8	25867.2	27021.9	16933	15973.8	20441.8	16811.6	18553.5	22840.3	20179.7	20171.5	19623.1
M884T183	[M-H]-	Pi 38:5	0.515403	0.80437	0.08501	883.532	183.182			Lipids and lipid-like molecules	Glycerophospholipids	Glycerophosphoinositols	46832.9	58393.7	41129.3	54102.7	49384	41277.9	36729.4	23404.6	53379.4	43970	35194.5	41490.6	40751	40751.8	39905
M882T244	[M-H]-	Pi 38:6	0.176023	1.34206	0.221381	881.54	244.331						3993.82	1340.3	2733.36	104.435	2138.82	3526.55	2616.47	2730.7	3188.67	3424.5	3105.57	3504.51	3131.02	3039.99	3131.05
M879T184	[M-H]-	Pi 38:7	0.159449	0.993957	0.9599	879.498	183.73			Lipids and lipid-like molecules	Glycerophospholipids	Glycerophosphoinositols	6538.23	4726.55	5899.25	3910.31	5459.13	5231.88	5949.82	3227.78	5237.13	4552.36	6093.47	6512.83	5625.63	6491.71	5728.57
M908T243	[M-H]-	Pi 40:7	0.179268	0.840109	0.51878	907.553	243.12			Lipids and lipid-like molecules	Glycerophospholipids	Glycerophosphoinositols	4487.05	3006.49	2420.88	172.004	2585.28	4295.17	2162	1497.83	3071.07	2700.67	2200.77	2621.67	2743.35	2787.16	2743.28
M860T186	[M-H]-	Pi(16:0e/15-hete)	1.27648	0.887788	0.35757	859.534	186.369			Lipids and lipid-like molecules	Glycerophospholipids	Glycerophosphoinositols	296542	284768	221283	238995	306327	326037	247363	204330	374080	234935	174535	250870	245914	247886	245926
M897T217	[M-H]-	Pi(18:1/8,9-epete)	0.119608	0.774126	0.189374	897.49	217.333			Lipids and lipid-like molecules	Glycerophospholipids	Glycerophosphoinositols	1483.6	1027.53	1157.12	584.773	1356.76	1691.1	1216.37	459.567	1091.71	767.213	1057.52	1059.43	1192.89	1192.94	1179.53
M297T28_1	[M-H]-	Picein	0.282542	0.957797	0.729201	297.115	27.659		C10720	Organic oxygen compounds	Organooxygen compounds	Carbohydrates and carbohydrate conjugates	18865.8	22330.2	18574.7	11561.1	14795.2	20282.5	14037.6	17226.9	23473.9	15254.5	15584.7	16341.2	17558	17060.2	17060.5
M255T29	(M-H)-	Pinocembrin	0.21395	0.977956	0.822818	255.069	28.897						18912.3	21052	15703.3	16412.4	16230.4	21591.5	12762.5	16776.2	22293.9	18675.4	16147	20824.3	16487	17237.5	17309.3
M269T298	[M-H]-	Pinostrobin	0.41669	0.683536	0.09575	269.089	297.652		C16419	Phenylpropanoids and polyketides	Flavonoids	O-methylated flavonoids	10611.9	21411.1	20703.8	17150.4	18168.2	10510.3	10170.8	7174.34	5271	10450	16704.2	17596	14010.3	13503.1	14008.2
M605T361	[2M-H]-	Pipemidic acid	0.226815	1.86782	0.0607642	605.257	361.203	HMDB0041989		Organoheterocyclic compounds	Diazinanes	Piperazines	406.133	2577.34	2590.98	1454.8	564.324	451.938	1963.22	2625.1	1465.22	2716.41	2257.7	3999.96	2139.4	2136.09	2090.19
M406T367	[M-H-H2O]-	Platencin	0.193895	1.29431	0.236553	406.163	367.413			Benzenoids	Benzene and substituted derivatives	Benzoic acids and derivatives	1785.83	4147.74	4337.51	3758.26	1901.79	1657.86	3443.97	4687.8	3055.87	2425.16	3744.35	5408.4	3412.89	3408.99	3109.8
M225T353_1	[M-H]-	Prephenate	0.167295	0.490199	0.00526636	225.04	352.981	HMDB0012283	C00254	Organic acids and derivatives	Keto acids and derivatives	Gamma-keto acids and derivatives	1211.53	1420.98	1334.94	2232.91	1152.47	897.209	655.675	820.482	699.915	621.219	841.32	405.56	896.363	897.108	852.492
M463T25	[M-H]-	Pristimerin	3.51716	0.777349	0.665432	463.288	25.1		C08633	Lipids and lipid-like molecules	Prenol lipids	Triterpenoids	394921	45551	232833	38023.3	1.85547e+06	1.67698e+06	572852	896054	254041	390185	741381	444382	844629	885142	884331
M227T263	[M-H]-	Pro-ile	0.913589	2.05229	0.111261	227.139	262.716			Organic acids and derivatives	Carboxylic acids and derivatives	Amino acids, peptides, and analogues	7103.44	36466.8	48900	21135.1	5238.32	3131.91	27420.1	26845.7	12548.8	75307.8	56576.7	51630.5	34340.8	34311.5	36750.8
M213T19	[M-H]-	Propanoic acid, 2-(4-chloro-2-methylphenoxy)-	0.0518218	0.916037	0.380375	213.054	18.555		C18742	Benzenoids	Benzene and substituted derivatives	2-phenoxypropionic acids	942.24	1295.73	1073.52	992.561	1110.48	947.014	732.613	1202.01	903.545	1107.02	1111.1	771.123	1085.45	1095.97	1085.49
M295T590	[M+Cl]-	Propanoic acid, 3-[[[2-[(aminoiminomethyl)amino]-4-thiazolyl]methyl]thio]-	0.204511	0.972271	0.726333	294.992	589.629			Organoheterocyclic compounds	Azoles	Thiazoles	7416.13	6177.6	5724.22	4774.24	6733.74	6960.01	7045.65	5938.67	5991.58	6327.04	6505.67	4929.58	6695.24	6833.59	6836.39
M133T278	(M+CH3COO)-	Propionic acid	0.394716	0.795718	0.464668	133.05	277.899	HMDB0000237	C00163	Organic acids and derivatives	Carboxylic acids and derivatives	Carboxylic acids	35250.1	11715.8	23215.1	6389.15	9828.46	15000	16609.7	13273.2	8603.02	15923.1	15512.5	10763.2	31490.9	32141.6	31488.6
M707T66	[2M-H]-	Prostaglandin e1	2.75861	0.0175324	0.177882	707.463	66.432	HMDB0001442	C04741	Lipids and lipid-like molecules	Fatty Acyls	Eicosanoids	1262.95	349813	18872.2	771136	693.706	696.194	3298.8	2948.92	445.664	4145.07	4932.91	4258.95	101612	101587	105738
M309T58	[M-H-C2H4O]-	Prostaglandin f2.beta.	4.7139	0.390107	0.242342	309.206	58.034	HMDB0001483	C02314	Lipids and lipid-like molecules	Fatty Acyls	Eicosanoids	176003	1.55678e+06	793691	2.58506e+06	46837.2	55491.7	159438	226236	141338	684712	385483	436757	695617	645335	604511
M1048T433	[M-H]-	Protodioscin	0.0886689	0.853992	0.131988	1047.56	432.506		C08907	Lipids and lipid-like molecules	Steroids and steroid derivatives	Steroidal glycosides	1442.16	1718.66	1568.18	1854.33	1047.56	1300.73	1526.48	1211.14	1138.17	1157.6	1274.08	1320.05	1372.21	1370.91	1371.12
M295T326	M-	Prunasin	0.594838	0.253137	0.017224	295.102	326.123	HMDB0034934	C00844	Organic oxygen compounds	Organooxygen compounds	Carbohydrates and carbohydrate conjugates	4435.69	12288.4	5825.02	22321.8	20905.9	7722.72	2098.79	2241.6	1303.24	3859.32	4584.76	4517.73	7624.72	7752.33	7623.1
M243T157	[M-H]-	Pseudouridine	2.42528	0.850866	0.354759	243.062	157.056		C02067	Nucleosides, nucleotides, and analogues	Nucleoside and nucleotide analogues		836331	1.76394e+06	1.31889e+06	1.54915e+06	893722	732619	1.0382e+06	986637	859625	843445	1.1743e+06	1.13439e+06	1.08437e+06	1.09389e+06	1.08431e+06
M325T319	[2M-H]-	Pterine	0.473661	0.329861	0.170309	325.092	319.286	HMDB0000802	C00715	Organoheterocyclic compounds	Pteridines and derivatives	Pterins and derivatives	2493.92	16953.4	5590.82	22121.9	1051.38	1091.51	2127.12	1983.95	1484.91	4138.84	3584.86	2943.44	5329.3	5438.56	5438.35
M287T336	(M-H2O-H)-	Pyrethrosin	0.169093	1.16929	0.530377	287.135	335.859						1283.47	7681.01	5651.07	4033.18	3389.98	2841.29	3595.52	4694.39	3255.11	6757.03	4563.36	6226.55	3371.7	2709.42	3369.44
M228T434	[M-H-H2O]-	Pyridoxal phosphate	0.0549192	1.08358	0.696989	228.027	434.385	HMDB0001491	C00018	Organoheterocyclic compounds	Pyridines and derivatives	Pyridine carboxaldehydes	953.708	2210.06	1526.6	1854.86	2239.3	3031.4	1679.67	1640.11	2792.57	1914.48	3253.72	1522.92	1758.47	1602.13	1759.47
M109T282	[M-H]-	Pyrocatechol	0.974036	0.383442	0.0390589	109.029	281.906	HMDB0000957	C00090	Benzenoids	Phenols	Benzenediols	42755.6	14161.2	21855.8	8914.45	36908.8	60493.5	9022.33	9408.31	11751.5	12786.6	12431.1	15571.2	25145.3	24958	21799.7
M584T284	[M+Cl]-	Pyrrolidinium, 1-[(7r)-7-(acetyloxy)-4-hydroxy-4-oxido-3,5,9-trioxa-4-phosphapentacos-1-yl]-1-methyl-, inner salt	0.200374	1.49418	0.400025	584.34	284.143						73.9536	4455.56	3271.68	1101.23	203.64	68.4065	1746.49	4028.97	1889.95	2389.38	2306.08	1347.41	1938.11	1939.44	1876.26
M143T254	(2M-H)-	Pyruvaldehyde	0.96212	0.140408	0.133312	143.034	253.766	HMDB0001167	C00546	Organic oxygen compounds	Organooxygen compounds	Carbonyl compounds	2082	72130.4	13172.7	70312.6	2259.89	1486.41	3910.87	1716.79	1165.38	7184.22	4294.51	4396.25	18820	19058.3	18840.6
M463T228	[M-H]-	Quercetin 3-glucoside	0.335105	0.532539	0.0744747	463.107	227.649	HMDB0037362	C05623	Phenylpropanoids and polyketides	Flavonoids	Flavonoid glycosides	7071.61	2521.83	2765.2	3139.58	4813.11	7246.42	588.469	2176.59	808.227	4356.57	3779.47	2966.27	3981.89	4044.48	4044.93
M383T439	(2M-H)-	Quinic acid	0.634495	0.205648	0.110817	383.117	438.97						27008	48110.8	2244.86	3258.51	23679.3	807.092	1623.45	1919.12	1319.48	1286.47	1932.75	13534.1	1154.8	1167.99	1351.07
M503T437	[M-H]-	Raffinose	0.771414	0.708463	0.286008	503.16	437.471	HMDB0003213	C00492	Organic oxygen compounds	Organooxygen compounds	Carbohydrates and carbohydrate conjugates	37471.1	110347	54941.4	89169.1	32592.8	31395.8	29778.3	65054.1	32313.3	64757.7	31245.9	29005.1	44736.2	45051.3	45058.2
M439T47	[M-H-H2O]-	Raltitrexed	0.461149	0.684397	0.305243	439.104	47.389	HMDB0014438	C11372	Organic acids and derivatives	Carboxylic acids and derivatives	Amino acids, peptides, and analogues	14537.6	9602.81	33226.1	53339.6	39031.1	16447.4	13330.8	32799.8	3284.12	22026	17180.2	25115.2	28611.1	28610.1	29213.7
M353T25	[M-H]-	Rauwolscine	1.18096	0.67853	0.355876	353.199	25.062						123035	188804	108193	273287	40559.7	20688.7	55153.5	96586.8	111793	19866.6	102576	126020	56741.8	57617	57433.4
M803T413	[M-H]-	Rebaudioside b	0.116352	1.41631	0.451567	803.378	412.87			Lipids and lipid-like molecules	Prenol lipids	Terpene glycosides	147.73	1398.5	1487	689.599	173.161	28.6544	780.254	2025.44	522.776	751.09	785.887	693.054	696.965	697.011	704.925
M949T385	[M-H]-	Rebaudioside c	0.154721	2.70347	0.00882836	949.426	384.628			Lipids and lipid-like molecules	Prenol lipids	Terpene glycosides	33.186	649.054	758.142	164.836	154.846	78.8934	990.955	914.763	412.156	812.322	1097.26	744.104	515.577	506.395	506.315
M257T142	(M-H)-	Ribothymidine	0.515661	0.39749	0.0256377	257.077	142.004	HMDB0000884		Nucleosides, nucleotides, and analogues	Pyrimidine nucleosides		6276.11	20057.2	9845.58	16290.3	6747.47	5383.17	3760.05	4096.96	3903.94	4245.08	4859.04	4812.68	8268.75	8081.24	8038.02
M493T22	[M-H]-	Rubranoside a	0.325957	1.30141	0.564647	493.223	22.056			Phenylpropanoids and polyketides	Diarylheptanoids	Linear diarylheptanoids	435.25	8155.4	4395.65	14272	645.646	423.56	4852.71	6875.54	8030.33	4002.08	5141.87	7963.3	4853.1	4852.53	4935.93
M571T165	[2M-H]-	Salicin	0.604161	0.52972	0.262751	571.209	164.541	HMDB0003546	C01451	Organic oxygen compounds	Organooxygen compounds	Carbohydrates and carbohydrate conjugates	19124.4	5558.38	724.716	3193.08	36462.4	21636.5	12057.5	6741.55	8536.43	6824.82	4563.83	7202.34	13283.4	13286.3	12865
M158T173	(M+Na-2H)-	Salicylamide	0.332884	0.503924	0.061265	158.02	172.659						6987.16	2584.85	1729.81	4399.52	4476.15	7886.24	4525.95	2101.55	1328.47	1451.98	3033.8	1700.23	2661.92	2861.39	2662.23
M137T34	[M-H]-	Salicylic acid	0.466043	0.631266	0.0483515	137.024	33.515	HMDB0001895	C00805	Benzenoids	Benzene and substituted derivatives	Benzoic acids and derivatives	11077.5	15146.7	18056.5	6460.55	14454.5	18673.5	5811.16	8128.66	7888.93	10253.7	14606.9	6254.43	9488.93	9467.27	10156.2
M627T25	[2M-H]-	Salicylic acid .beta.-d-o-glucuronide	0.960834	0.258719	0.0359173	627.122	25.472	HMDB0010313		Organic oxygen compounds	Organooxygen compounds	Carbohydrates and carbohydrate conjugates	25674.4	17053.8	1545.83	20691.8	44099.4	59080.3	10250.3	12224	11356.8	4515.79	3291.15	1864.32	20693.6	19778.3	20679.7
M150T73	[M-H-CO2]-	Salicyluric acid	0.798365	0.460882	0.0476922	150.031	73.1685	HMDB0000840	C07588	Benzenoids	Benzene and substituted derivatives	Benzoic acids and derivatives	35823.7	17081.5	25878.2	23580	64841.6	20039.3	11868.6	16651.7	12370.2	14462.2	22075.4	8869.36	24586.6	25477.6	25479
M359T98	(M+CH3COO)-	Salidroside	0.983136	0.330901	0.185673	359.132	98.0245						69404	14508.8	9828.59	14711.4	658.146	99698.4	6439.05	12667.3	13639.2	10078.3	12661.4	13610	10629.1	10632.7	4685.24
M431T410	[M-H]-	Salvinorin a	0.160601	1.35466	0.140973	431.176	410.43		C20196	Lipids and lipid-like molecules	Prenol lipids	Terpene lactones	1038.53	2025.5	2424.7	2253.44	1037.53	839.559	1761.5	2108.37	1546.21	2854.38	2079.84	2680.53	1927.05	1926.59	1889.92
M593T347	[M-H]-	Saponarin	0.983934	0.252233	0.0468243	593.15	347.338		C08064	Phenylpropanoids and polyketides	Flavonoids	Flavonoid glycosides	15685.9	36684.4	12793.4	80419.1	24363.3	19799.7	4658.97	5133.38	6418.96	9969.19	13604.7	8075.05	18138.2	18177.1	18193.4
M88T334	[M-H]-	Sarcosine	0.471028	1.10696	0.7008	88.0403	334.477	HMDB0000271	C00213	Organic acids and derivatives	Carboxylic acids and derivatives	Amino acids, peptides, and analogues	46680.1	100577	104201	55229.3	40075.7	37410.3	60146.1	45978.9	32735.7	82986.6	110327	93089.1	60397	62626.5	60419.2
M193T47	(M-H)-	Scytalone	0.472365	0.697636	0.382491	193.05	46.723						9241.7	18281.7	24580.1	7267.14	44187.2	23727.4	2838.63	12734.1	15836.6	28897	25192.4	3300.1	18108.9	19551.6	19284.6
M437T418	[M-H]-	Sec-o-glucosylhamaudol	0.280387	0.422653	0.223076	437.125	418.243			Organoheterocyclic compounds	Benzopyrans	1-benzopyrans	441.033	6685.19	3088.08	8299.06	431.828	624.418	838.534	720.699	867.069	2746.52	1353.15	1745.19	2978.45	3021.64	3023.87
M289T455	[M-H]-	Sedoheptulose 7-phosphate	0.381373	1.02251	0.897638	289.032	454.526	HMDB0062754	C05382	Organic oxygen compounds	Organooxygen compounds	Carbohydrates and carbohydrate conjugates	31365.3	18221.2	29561.4	11434.2	22569.7	22895	26616.2	26437	13282.9	18156.7	27521.3	27095.6	22001.8	22348.6	21998.6
M251T235	[M-H]-	Ser-Phe	0.361999	1.19354	0.66016	251.103	234.671			Organic acids and derivatives	Carboxylic acids and derivatives	Amino acids, peptides, and analogues	1358.09	21304.3	16992	11905.4	3783.69	2471.5	6651.5	8903.89	6386.41	20390.5	10457.5	16214.8	8143.61	8260.39	8140.07
M173T348	[M-H]-	Shikimate	0.810484	0.222497	0.00889774	173.045	347.933	HMDB0003070	C00493	Organic oxygen compounds	Organooxygen compounds	Alcohols and polyols	9120.87	28050	15997.7	40528.9	17170.6	11075.2	5540.21	5586.95	2886.57	4738.5	3276.92	5102.92	13960.9	12396.9	12343.6
M385T125	[M-H]-	Sinapoylhexoside	0.978597	0.867917	0.845718	385.112	125.377			Phenylpropanoids and polyketides	Cinnamic acids and derivatives	Hydroxycinnamic acids and derivatives	12957.4	80205.1	14812.5	212802	17606.3	18146.2	60309.1	2510.85	129955	11649.4	100245	4769.66	41720.9	41692.1	39969.1
M912T363	[M-H]-	Soyasapogenol b base + o-hexa-pen-dhex	0.245581	4.8526	0.000176922	911.519	363.418	HMDB0034650		Lipids and lipid-like molecules	Prenol lipids	Terpene glycosides	18.7431	421.955	1181.52	133.414	77.7543	62.2352	1360.51	1669.29	1997.33	1401.98	1367.68	1401.88	969.619	969.803	1003.43
M607T264	[M-H]-	Spinosine	0.44017	0.230759	0.0047065	607.165	263.743		C17834	Phenylpropanoids and polyketides	Flavonoids	Flavonoid glycosides	7804.12	4681.06	2405.8	7244.23	9922.2	2907.29	1001.8	832.781	705.58	1451.95	2219.71	1856.59	3222.8	3373.98	3222.6
M283T4	(M-H)-	Stearic acid	0.334359	1.71757	0.214657	283.263	3.6905	HMDB0000827	C01530	Lipids and lipid-like molecules	Fatty Acyls	Fatty acids and conjugates	7640.26	7687.16	7234.66	7518.02	7000.63	7935.22	6121.07	5339.2	24634.9	10137.2	26320.1	4765.43	7152.87	7263.81	7154.03
M243T265	[M-H]-	Suberosin	0.177501	1.36546	0.166923	243.08	265.355						439.701	3609.04	3000.7	2801.71	2640.83	1038.36	3546.16	2043.02	3017.54	2995.93	3419.69	3452.78	3084.2	3082.43	3009.17
M527T23	[2M-H]-	Suberoylanilide hydroxamic acid	1.7043	1.11346	0.609175	527.305	22.54	HMDB0015568					525301	1.28275e+06	989580	621323	675127	547025	524935	703296	1.34041e+06	909333	905369	784335	863833	860648	860674
M117T455	(M-H)-	Succinate	0.0992286	0.9968	0.975581	117.019	454.657	HMDB0000254	C00042	Organic acids and derivatives	Carboxylic acids and derivatives	Dicarboxylic acids and derivatives	2158.54	2070.03	2079.26	2030.44	2186.33	3290.6	2454.33	2063.85	2119.66	2022.69	2285.12	2825.35	2208.7	2217.95	2208.7
M341T356	[M-H]-	Sucrose	1.19573	5.77499	0.155749	341.108	355.569	HMDB0000258	C00089	Organic oxygen compounds	Organooxygen compounds	Carbohydrates and carbohydrate conjugates	3512.63	25793.3	9951.2	27983	2365.29	3242.39	36892.6	45206.1	35005.8	256589	20601	26401.1	36532.2	34332.9	34288.7
M574T31	[M-H]-	Sulfobacin b	0.813325	3.02333	0.0704309	574.449	30.703			Lipids and lipid-like molecules	Fatty Acyls	Fatty amides	6753.1	7607.71	6809.6	7959.72	8403.01	9361.42	24742.8	52646.5	39748.1	5759.75	9765.43	9115.03	13524.7	15611.4	13529.6
M373T252_1	[M-H]-	Swertiamarin	0.228893	0.666248	0.354046	373.097	251.713		C09800	Organic oxygen compounds	Organooxygen compounds	Carbohydrates and carbohydrate conjugates	2123.89	3651.31	8058.69	4890.13	2260.35	3560.7	511.868	1302.4	996.968	3546.97	2330.79	7664.12	3050.02	3186.48	3189.24
M197T170	[M-H]-	Syringic acid	0.974101	0.210917	0.0258453	197.045	169.724	HMDB0002085	C10833	Benzenoids	Benzene and substituted derivatives	Benzoic acids and derivatives	39736.1	11490.1	11801.7	14915.5	59304.6	21697.9	1451.77	5573.09	3302.29	7333.13	11905.8	3958.27	16656.7	16585.1	13677.2
M514T191_1	(M-H)-	Taurocholate	0.211284	1.24709	0.588652	514.281	190.981	HMDB0000036	C05122	Lipids and lipid-like molecules	Steroids and steroid derivatives	"Bile acids, alcohols and derivatives"	2422.45	3141.93	9624.43	2067.01	159.779	2362.52	4701.17	1808.55	4826.17	2794.97	5003.11	5531.23	3412.74	3331.55	3392.69
M165T353	[M-H]-	Terephthalic acid	0.236143	0.752291	0.337484	165.019	353.009	HMDB0002428	C06337	Benzenoids	Benzene and substituted derivatives	Benzoic acids and derivatives	10096	5214.37	5910.4	15643.5	13197.1	5285.5	6551.68	5784.03	13558.3	5524.97	5031.88	5186.03	8800.56	6553.5	6450.31
M583T23	[M-H]-	Terragine e	0.736372	1.84045	0.00978984	583.365	22.54						8472.3	17952.2	24535.2	20422.8	11265.2	7840.63	15050.7	26152.7	31580.3	35212.5	29750.5	28792.8	19949	19951.4	20312.6
M351T183	[M-H]-	Tetrahydroalstonine	0.488016	0.224688	0.159392	351.191	183.178		C11682				3752.8	29297.2	2865.41	13435.7	1605.52	2209.83	3313.23	43.6201	131.372	2648.23	1491.85	4317.54	6352.1	6611.92	6615.79
M444T305	[M-H]-	Tetrahydrofolate	0.127798	1.32525	0.248098	444.152	305.288	HMDB0001846	C00101	Organoheterocyclic compounds	Pteridines and derivatives	Pterins and derivatives	1680.4	2547	2701.8	1696.28	1110.6	1648.05	1277.89	2317.76	1540.8	4228.23	2682.62	3039.52	1733.59	1678.45	1426.78
M631T338	[M-H]-	Tetrahydrogambogic acid	0.174282	1.46648	0.266319	631.304	338.386			Organoheterocyclic compounds	Benzopyrans	1-benzopyrans	388.983	2841.58	2621.33	1529.23	425.702	366.324	1036.33	2461.6	1307.43	2545.36	2300.72	2334.3	1313.77	1221.28	1232.12
M424T420_1	[M-H]-	Thiamine pyrophosphate (tpp)	0.177273	1.82789	0.00255781	424.031	419.532	HMDB0001372	C00068	Organoheterocyclic compounds	Diazines	Pyrimidines and pyrimidine derivatives	924.468	847.823	1086.07	365.808	965.62	1344.15	1761.8	2063.52	1640.98	1210	1405.33	2033.84	1096.09	1095.94	1053.2
M175T340	[M-H]-	Thr-Gly	0.172248	1.18884	0.508894	175.071	339.607			Organic acids and derivatives	Carboxylic acids and derivatives	Amino acids, peptides, and analogues	1103.73	6857.91	6610.77	3661.43	6771.49	3577.9	4275.67	4734.47	2849.9	8861.54	5890.64	7368.6	4290.85	4266.5	4290.85
M219T312	[M-H]-	Thr-Thr	0.31542	1.28649	0.604753	219.098	312.296			Organic acids and derivatives	Carboxylic acids and derivatives	Amino acids, peptides, and analogues	1364.36	14167.3	12003.7	7695.94	1532.9	2005.6	3671.29	4101.84	2486.77	18658	8400.43	12558.8	7154.51	7282.9	7150.91
M311T28_2	[M-H]-	Thymol-beta-d-glucoside	1.23757	0.861499	0.398569	311.167	27.659			Lipids and lipid-like molecules	Prenol lipids	Terpene glycosides	321872	505798	396454	545270	234124	264986	216405	312054	417422	368479	287783	352170	360258	359433	370999
M584T275	[M-H]-	Tigecycline	0.142134	1.29083	0.508997	584.281	274.643		C12012				95.0103	1786.93	2341.15	1320.29	267.699	94.6791	1320.52	1718.18	1105.53	1480.7	748.332	1250.05	788.699	790.072	791.12
M313T167	(M-H2O-H)-	Tosyllysine Chloromethyl Ketone	0.248562	0.553251	0.0413904	313.074	167.475						3642.54	4233.32	1727.62	5573.55	2435.22	1976.03	1375.79	1772.73	1502.02	2252.26	1899.49	2034.97	1066.3	1554.97	1376.97
M287T115	[M-H]-	Trans-dehydroandrosterone	0.976465	1.8304	0.0332371	287.221	114.73	HMDB0000077	C01227	Lipids and lipid-like molecules	Steroids and steroid derivatives	Androstane steroids	20950.7	14053.7	52228	10158.5	50069.4	28748.2	48642.5	85875.1	45825.1	53740.3	43298.1	45150.2	43894.8	47764.4	43748.5
M350T164	[M-H]-	Trans-zeatin-riboside	0.227537	1.04549	0.906507	350.149	163.669						1357.53	8154.24	9091.77	6939.77	1636.21	1007.22	2946.49	4247.37	3448.95	9007.58	4282.3	5536.37	5301.55	5303.34	5069.98
M677T32	[M-H]-	Tricaffeoyl quinic acid	0.818735	0.411253	0.247108	677.151	32.482			Organic oxygen compounds	Organooxygen compounds	Alcohols and polyols	16863.2	37684.8	10183.5	99835	14829.7	10823.3	37556.3	8675.62	7766.41	1562.67	6366.96	16300.3	17288.4	17290.3	17445.2
M227T163_1	[2M-H]-	Trifluoroacetic acid	1.74191	0.0480637	0.132124	226.996	163.464	HMDB0014118		Organic acids and derivatives	Carboxylic acids and derivatives	Alpha-halocarboxylic acids and derivatives	1514.75	197266	15781.9	243885	6706.39	4559.77	3677.36	2150.61	4237.19	2811.51	8771.34	928.136	8083.56	7798.29	8083.45
M491T128	[M-H]-	Triflusulfuron-methyl	0.828486	3.62816	2.32383e-05	491.117	128.293		C18901	Organic nitrogen compounds	Organonitrogen compounds	Sulfonylureas	3856.53	6785.99	4070.09	11309.5	2913.99	3854.08	16265.8	22274	19677.5	25602.6	18403.5	16744.6	13942.5	13488.7	13477.2
M331T448	[M-H]-	Trp-Lys	0.188395	1.6283	0.132158	331.161	448.488			Organic acids and derivatives	Carboxylic acids and derivatives	Amino acids, peptides, and analogues	398.37	3119.1	1363.12	1744.46	415.185	375.362	2306.74	2113.2	1400.48	2482.4	2072.75	1699.27	1902.51	1652.38	1657.89
M300T237	[M-H]-	Trp-Pro	0.25031	1.54957	0.238312	300.135	237.168			Organic acids and derivatives	Carboxylic acids and derivatives	Amino acids, peptides, and analogues	2644.54	2602.11	4973.72	2220.47	3701.05	2604.31	2105.68	2355.75	1560.92	8510.94	6443.75	8071.57	3956.55	3924.5	3927.12
M720T363	[M-H]-	Tubacin	0.137106	1.79692	0.150294	720.293	362.765			Organoheterocyclic compounds	Azoles	Oxazoles	130.899	903.71	1467.95	638.145	234.367	70.1002	913.86	989.899	606.444	1946.6	760.921	972.973	726.633	725.1	753.78
M506T331	[M-H]-	Tyr-Tyr-Tyr	0.122372	1.3856	0.357234	506.198	330.925			Organic acids and derivatives	Carboxylic acids and derivatives	Amino acids, peptides, and analogues	174.947	1343.96	1909.9	288.363	202.259	623.241	916.201	1056.51	923.33	942.308	1030.18	1425.8	812.493	801.107	881.643
M678T384	(M-H)-	UDP-N-acetylmuraminate	0.110412	0.913801	0.85337	678.095	383.796						1156.08	72.083	353.037	278.428	973.567	2329.69	572.291	1532.07	1226.94	472.33	444.572	469.647	576.156	562.925	576.284
M535T429	[M-H]-	Udp-xylose	0.0560792	1.04473	0.822574	535.035	429.127		C00190	Nucleosides, nucleotides, and analogues	Pyrimidine nucleotides	Pyrimidine ribonucleotides	1015.4	636.605	687.505	1031.67	400.259	1394.13	994.04	751.356	646.821	765.486	1121.15	1117.75	780.255	797.613	798.062
M111T86	[M-H]-	Uracil	0.930382	1.08535	0.587366	111.019	85.601	HMDB0000300	C00106	Organoheterocyclic compounds	Diazines	Pyrimidines and pyrimidine derivatives	138249	73168.1	104841	44395.1	89381.6	121073	117398	99539.4	96796.8	87381	110144	108595	98009.1	99081.2	98001.1
M167T320	[M-H]-	Uric acid	0.64521	2.88385	0.10968	167.02	320.31	HMDB0000289	C00366	Organoheterocyclic compounds	Imidazopyrimidines	Purines and purine derivatives	3109.68	748.463	753.327	3935.8	9518.28	12708.2	23042.5	25408.6	29587.3	2357.44	6227.26	2123.79	2954.59	2902.37	2954.66
M403T425	[M-H]-	Uridine 5'-diphosphate	0.260415	0.991926	0.924586	402.985	424.805	HMDB0000295	C00015	Nucleosides, nucleotides, and analogues	Pyrimidine nucleotides	Pyrimidine ribonucleotides	12055.2	8275.83	9368.44	7507.98	10709.8	11749.2	10083.3	9337.98	11056.4	8712.72	10175.6	9818.58	9224.42	9340.71	9341.98
M579T472	[M-H]-	Uridine 5'-diphosphoglucuronic acid (UDP-D-glucuronate)	0.216354	1.15912	0.395902	579.025	471.923			Nucleosides, nucleotides, and analogues	Pyrimidine nucleotides	Pyrimidine nucleotide sugars	8373.22	3098.34	5892.2	3134.31	6221.23	5534.65	5867.67	5981.34	4484.02	5723.78	7464.17	7865.11	5594.79	5787.84	5607.15
M323T432	[M-H]-	Uridine 5'-monophosphate	0.706224	0.835805	0.626247	323.027	431.809	HMDB0000288	C00105	Nucleosides, nucleotides, and analogues	Pyrimidine nucleotides	Pyrimidine ribonucleotides	55484.3	17900.9	25778	5499.88	27034.8	74854.9	29472.6	25724.5	14062.4	24259.8	38953.7	40164.9	30679.7	30750.5	34487
M323T295	[M-H]-	Valaciclovir	0.819067	0.213452	0.000812352	323.133	295.197	HMDB0014716		Organic acids and derivatives	Carboxylic acids and derivatives	Amino acids, peptides, and analogues	12407.9	29138.7	14162.2	22983.1	16913.6	11998.9	1874.57	1627.6	862.914	6079.69	5509.35	7014.32	12054.9	12339.2	12336.4
M116T290_2	[M-H]-	Valine	1.9508	1.04542	0.888661	116.072	290.006	HMDB0000883	C00183	Organic acids and derivatives	Carboxylic acids and derivatives	Amino acids, peptides, and analogues	391877	699772	1.10089e+06	597729	741904	245891	441954	338920	216817	783210	976585	1.1922e+06	630564	641997	628185
M151T187	[M-H]-	Vanillin	0.555727	0.481125	0.119977	151.039	187.202	HMDB0012308	C00755	Benzenoids	Phenols	Methoxyphenols	21498.5	5668.17	4397.26	3532.97	17435.9	14849.9	2933.47	9237.71	2274.83	6066.97	9623.69	2282.83	6698.39	6699.94	6815.03
M809T398	[M-H]-	Vinblastine	0.118705	1.65338	0.237899	809.402	398.118		C07201				50.3687	1165.51	1607.86	282.011	44.0234	873.706	805.32	957.678	519.241	1719.3	763.016	1887.78	903.624	903.107	946.611
M822T370	[M-H]-	Virginiamycin component a	0.101521	1.3023	0.340592	822.363	370.314		C11269	Organic acids and derivatives	Peptidomimetics	Depsipeptides	413.286	1403.54	1056.25	552.039	293.895	206.398	850.609	810.883	977.231	870.572	684.948	917.833	927.912	917.105	1006.65
M629T231_1	[M+Cl]-	Vitexin 4-o-glucoside	0.309379	0.37215	0.0724775	629.126	230.661			Phenylpropanoids and polyketides	Flavonoids	Flavonoid glycosides	1526.46	4670.16	850.304	9024.72	3896.99	3241.81	1439.48	2291.75	961.878	1970.64	830.094	1143.92	1458.35	1259.11	1227.64
M151T205	[M-H]-	Xanthine	0.610892	0.913172	0.718296	151.026	205.003	HMDB0000292	C00385	Organoheterocyclic compounds	Imidazopyrimidines	Purines and purine derivatives	49416.8	20462.9	28948.3	16131.4	26680.9	53536.7	41087.2	41053.9	19027.6	17568.2	33623.7	25869.6	28878.7	30065.3	28867.1
M253T424	[M-H-H2O]-	Zoledronic acid	0.208911	0.854383	0.370255	252.996	424.476	HMDB0014543		Organic acids and derivatives	Organic phosphonic acids and derivatives	Bisphosphonates	6301.29	5170.23	8201.11	2823.97	5021.36	6621.13	4920.39	6351.8	3763.63	5842.14	5011.4	3278.49	3518.27	4812.04	4815.88
M211T285	[M-H]-	Zonisamide	0.273723	0.673533	0.000849033	211	285.471	HMDB0015045	C07504				5811.64	5763.33	5059.52	6131.94	4485.79	5079.52	4423.52	3299.41	2809.83	3175.19	4468.58	3599.97	4597.24	4623.74	4596.8
M350T146			0.481647	4.93724	4.67974e-07	350.231	146.273						993.891	1088.46	2163.81	706.004	1369.15	871.083	5468.62	4698.76	5847.33	6242.32	7320.82	5932.74	3908.92	3820.16	3803.7
M485T361_2			0.449363	0.348751	8.23421e-07	485.104	360.593						5402.71	6182.35	5745.51	7154.04	6634.37	6082.84	2117.59	1634.45	1352.13	2727.75	1981.71	3160.53	4488.06	4487.91	4376
M527T388_1			0.208787	0.536162	1.55838e-06	527.14	388.137						2118.32	2245.67	2043.58	2016.62	2091.5	1908.76	1376.47	1155.17	1162.59	1217.82	790.369	959.112	1767.63	1772.41	1771.31
M271T181			0.954326	0.224654	3.03877e-06	271.154	181.269						21778.6	25894.7	25549	20289.7	30065.5	19442.6	3414.4	3413.15	3972.52	8034.28	3812.41	9483.24	18527.8	18969.7	19382.7
M502T387_1			0.14782	0.480731	3.04954e-06	502.138	387.344						845.361	976.128	848.014	907.676	745.102	958.893	466.371	450.515	363.512	433.665	291.669	533.089	824.531	773.692	773.637
M501T361_2			0.203999	0.435899	3.56257e-06	501.077	360.558						1302.89	1648.31	1333.5	1532.59	1448.7	1551.64	470.746	488.751	583.82	618.683	738.196	943.401	1196.9	1196.54	1153.67
M727T139			0.901045	2.77546	4.49599e-06	726.54	139.194						9060.21	9884.08	10898.8	6242.71	11502.3	9151.57	21485.2	32577.9	21998.5	28582.8	27643.5	25190.9	14661.1	14660.9	14690.1
M409T168			0.471428	0.205946	5.14172e-06	408.985	168.373						6163.96	6387.56	4520.5	6949.84	4250.38	6248.15	1032.73	656.828	1934.12	1136.19	393.193	1956.27	2825.31	2929.95	2925.76
M761T172			0.861902	2.54616	5.27561e-06	760.567	171.801						8532.56	9778.41	13613.1	8662.36	13587.5	8035.82	21430.3	27552.6	29670.8	30607.9	26351.8	22782.5	15248.9	15248.9	14987.4
M191T390			0.756423	0.482876	5.75115e-06	191.055	390.45						25777.7	24032.6	19136	22929.1	24994.3	21226.6	11282.5	7012.73	11155.1	12321.3	11091.8	13820	16384	16510.3	16384.4
M612T83			2.46694	6.67513	6.19635e-06	612.173	83.173						7788.83	42780	58288.4	12437.3	5432.03	6807.74	97200.1	155806	177560	159039	162440	139314	62461.3	55488.7	62448.3
M125T155			0.472656	0.595266	8.20089e-06	124.991	155.148						11750	11935.6	11002.7	11024.3	10733.9	10537.9	5793.61	5929.03	5308.19	7067.54	7193.7	8581.42	9647.07	9531.8	9644.91
M904T302			0.234228	3.26375	8.49069e-06	903.73	302.164						631.573	218.91	843.182	53.4896	591.855	834.505	1470	1706.16	1820.95	1864.31	1752.58	1743.56	984.775	981.699	846.827
M787T229_1			0.305846	0.496316	9.09174e-06	787.171	228.907						4457.08	4045.8	3959.97	4580.07	4396.67	3768.7	2971.59	1959.98	2080.3	2387.5	1625.28	1486.64	3571.99	3615.77	3570.87
M941T453_1			0.213148	4.51634	9.27346e-06	940.976	452.589						143.586	302.346	653.568	55.7739	220.619	157.189	1027.45	1309.02	1038.09	1217.05	1361.96	970.347	665.657	680.581	665.726
M291T330			0.251238	0.472754	9.97451e-06	291.011	329.973						2641.74	2504.23	2254.67	2103.46	2680.38	2569.69	1349.28	666.545	909.489	1224.48	1312.67	1512.62	1796.69	1863.96	1863.81
M574T72			2.97059	8.27492	1.0016e-05	574.181	72.017						6537.47	32400.1	94475.9	2801.17	6889.07	815.804	191992	250424	236823	164295	189934	157456	94908.2	94746.8	71895.5
M229T330			0.294777	0.442627	1.08912e-05	229.011	329.952						3568.08	3544.12	3024.67	2795.86	3254.31	3152.53	1606.69	665.655	1194.16	1553.77	1526.17	2013.76	2513.84	2601.36	2515.03
M533T389_2			0.145301	0.717088	1.13143e-05	533.17	389.176						1703.18	1729.04	1656.44	1897.23	1847.45	1674.73	1267.55	1166.35	1287.78	1418.04	1089.13	1306.36	1225	1243.66	1243.47
M289T330			0.222085	0.450229	1.1539e-05	289.032	329.952						2024.63	1963.88	1589.64	1717.1	2125.48	1713.68	926.699	504.921	700.738	787.331	913.998	1179.34	1394.89	1394.54	1234.26
M453T58			1.00403	0.0991174	1.17154e-05	453.177	57.6925						27887.6	21798.8	12970.8	26240.7	29628.9	18850.8	2126.75	1286.49	2894.09	2620	2647.7	2041.47	12354.2	13685.6	13672.7
M657T156			0.606017	1.64419	1.24728e-05	657.495	156.158						13302.4	13781.1	14895.1	10241.9	13132.4	9380.01	18706	20000.2	20503	22455.8	20500	20710.1	15188.2	15191.1	14916.5
M941T384			0.269969	5.10718	1.31033e-05	941.484	384.121						15.0534	718.96	946.689	313.363	28.6311	36.459	1758.86	1885.33	1535.88	1607.49	1999.85	1729.08	1481.94	1492.36	1588.94
M328T71			0.590256	7.56021	1.36922e-05	328.045	71.32						841.767	1564.38	2470.82	166.051	1195.37	707.161	5563.24	9858.08	12078.5	8444.86	9234.5	7330.56	6236.49	5551.32	5696.21
M754T137			0.497966	4.68061	1.3702e-05	753.561	137.358						1264.93	1007.72	3272.68	237.688	1825.45	628.195	4690.52	6944.82	5644.19	8004.14	6876.57	6392.37	3967.8	3967.74	4263.43
M382T52_1			0.80179	4.15528	1.43438e-05	382.138	51.931						2985.88	5811.44	7807.44	628.606	3944.09	4060.43	13198.8	21975.6	17380.3	18715	19581	14019.7	12788.7	13163.9	13166.3
M463T48			1.07935	10.4694	1.52383e-05	463.096	47.999						1840.1	2638.95	6370.47	1814.74	704.758	1460.52	27232.4	39634.1	21518.9	21037.9	23676.1	22156.5	9872.83	9515.6	9630.74
M515T169			0.44306	0.196297	1.76095e-05	514.991	168.519						5287.43	6168.14	3335.82	6219.88	4054.49	5170.85	748.832	691.313	2050.27	1188.67	279.861	976.417	2782.94	2780.87	2677.03
M381T169			0.420435	0.205311	1.76868e-05	381.485	168.519						5403.33	4912.2	3144.32	5441.2	4699.86	4591	439.825	253.727	2496.39	1264.91	306.246	1027.01	2469.49	2466.82	2354.61
M462T169			0.463551	0.213682	1.80734e-05	461.988	168.51						6451.95	6679.97	3572.4	6747.6	4366.4	5492.95	1026.71	1225.67	1126.79	1567.86	444.607	1726.39	3351.15	3279.57	3255.08
M399T360			0.251294	0.332638	1.84954e-05	399.055	360.471						1833.88	2153.79	1344.36	2347.67	1722.42	1891.85	550.311	412.175	422.846	898.349	632.654	840.467	1288.17	1231.36	1229.19
M633T165			0.972704	0.26516	1.88852e-05	633.193	164.909						22356.1	24922.6	21727.2	36290.2	24936.2	25048.3	3457.28	5530.52	4251.75	11837.3	7455.63	8641.68	15977.4	17427.6	17338.6
M426T358			0.291171	6.51592	1.96712e-05	426.27	358.169						29.23	212.363	1331.05	112.893	104.106	18.7399	1677.56	2074.31	1883.01	1948.42	1991.92	2208.05	1315.65	1346.26	1315.57
M723T394			0.163325	2.1743	2.04222e-05	723.269	394.325						415.562	646.981	388.904	614.723	399.935	492.23	1122.86	1179.7	1167.28	1165.42	793.215	1003.85	807.615	763.539	762.985
M200T169			0.328451	0.275471	2.12996e-05	199.97	168.653						3765.13	3324.04	2401.18	3476.61	2419.35	3665	1009.72	800.711	1636.3	805.904	298.085	697.37	1801.72	1802.95	1422.22
M380T58			0.657849	2.7627	2.1313e-05	380.088	57.718						5661.26	1606.66	6546.77	8611.27	5864.24	3217.43	11182.8	15775.8	15520.2	15607.7	14806.5	14153.1	6905.24	6656.28	6504.97
M762T131			0.839919	1.95864	2.16967e-05	761.579	130.78						19355	12850.3	20141.2	13277.2	13276.3	13232	34861.8	32734.3	27224.4	26455.4	31448.2	27728.9	20308.5	20088	20087.9
M223T406			0.680611	0.329149	2.18155e-05	223.045	406.28						15924	16186.3	9329.38	13567.4	14153.3	13019	3027.85	3238.09	2697.97	6694.9	5598.81	5791.6	8256.14	8451.61	8260.66
M884T298			0.214358	0.404709	2.18813e-05	883.972	298.304						1956.42	1818.09	1598.78	1744.05	1453.01	1614.84	1086.17	427.836	670.535	476.095	972.533	488.871	1586.92	1587	1562.55
M296T229			0.441703	0.601499	2.25426e-05	296.072	229.425						10687.6	11407.6	8716.48	11831.8	10454.1	10218.8	6410.25	4755.91	6676.92	6652.09	6241.81	7347.78	8285.18	8517.49	8280.28
M657T178			0.527982	1.44345	2.27281e-05	657.495	177.558						13925.9	16459.4	16105.3	15202.8	14667.3	12586.2	19473.1	20262.3	24054.1	22312.4	21505.8	20783.1	16477.5	17026.9	16850.4
M525T304			0.19372	1.29992	2.28788e-05	524.843	304.065						2977.87	3023.08	3014.12	2488.64	3308.13	2850.07	3794.56	4043.34	3818.94	3768.13	3822.55	3711.5	3460.8	3625.33	3626.59
M383T332			2.37271	0.205923	2.29622e-05	383.118	331.894						156305	184176	109604	149934	180615	104107	32798.5	5555.55	18072.8	30268.1	36002.3	59491.5	83399.2	85637.5	85653.3
M243T355			0.296439	0.357536	2.30351e-05	243.017	354.784						2601.82	3469.43	2276.03	2898.96	3746.52	2500.8	983.573	779.138	1299.36	1007.69	871.062	1313.76	1969.73	1969.53	1911.88
M517T169			0.475791	0.219885	2.41908e-05	516.988	168.514						6073.02	7352.45	3848.4	7273.85	5278.7	6173.49	1030.99	686.374	2640.22	1411.86	321.198	1825.19	3660.17	3662.45	3793.79
M686T154			0.569393	2.03556	2.45244e-05	685.526	153.937						5661.33	3926.23	7328.86	9251.24	9288.24	7262.92	12325	13500.9	15380.6	15432.7	15550.7	14766.7	12208.4	12208.2	12154.2
M247T168			0.435994	0.447305	2.52701e-05	246.981	167.838						7992.44	7864.96	5365.16	7809.88	6074.06	7648.33	2744.53	3475.19	3146.11	3709.28	2070.02	3979.3	5012.18	5010.91	5195.19
M519T168			0.396767	0.161968	2.63793e-05	518.985	168.387						4410.94	4851.87	2352.81	4501.91	3221.8	3995.01	513.929	103.577	1592.9	1001.93	206.863	360.207	1965.53	2016.85	2016.61
M135T26			1.33836	0.148403	2.80592e-05	135.008	25.692						49569.1	26006.9	39235.1	61313.3	37016.7	50848.7	4454.24	5225.1	4061.53	6155.27	9613.91	9666.95	26945.6	26946.8	25926.7
M330T168			0.425814	0.237298	2.82275e-05	330.48	168.476						5288.26	5564.71	3078.06	5409.25	3857.53	6051.48	806.231	510.053	1704.79	1850.48	1029.86	1039.37	2833.43	2871.04	2833.48
M940T453			0.208278	4.30112	2.89547e-05	940.475	452.679						131.357	330.842	716.915	66.5176	147.262	147.619	1098	1371.07	1018.86	995.903	1191.83	950.257	693.796	743.144	693.447
M636T302			0.41108	6.61604	2.95303e-05	636.275	302.482						33.1524	1066.5	1833.97	371.178	263.524	99.7463	3496.15	5144.25	4916.87	4325.97	3720.24	2664.61	2366.6	2335.07	2366.63
M300T168			0.555756	0.450273	3.00462e-05	299.984	167.838						11765.6	14511.9	9280.36	12908.8	9607.43	11715.2	3969.83	5049.51	6019.19	5509.35	4483.65	6392.69	8390.09	8469.45	8469.37
M253T481			0.721597	4.91933	3.04838e-05	253.07	481.333						2868.99	1811.91	5825.25	1732.98	2419.56	2446.29	11765	17036.7	18578.9	11440.2	9824.15	15500.2	8072.11	8145.67	8102.9
M81T55			0.909975	0.460165	3.05758e-05	80.9163	55.318						31353.6	39001.8	25651	36740.9	25429.1	31541.4	11737.4	13451.1	15639.4	15541.4	16617.1	14315.1	22977.2	24011.5	22976.8
M79T56			0.938668	0.42977	3.16396e-05	78.9183	55.872						31570.5	39069.7	26256.3	37625.8	24099.7	31977.2	11508.4	14693.7	13071.8	15116.7	11720.7	15802.5	20330.5	21734.2	20325.3
M437T168			0.407131	0.180957	3.22754e-05	437.484	168.476						4680.26	4561.34	2461.68	5179.5	3886.96	4739.96	717.649	463.399	2140.31	722.862	186.017	385.941	2440.32	2262.58	2262.03
M657T360			0.33852	0.156944	3.33074e-05	657.098	360.413						2600.21	3656.2	1730.71	3585.02	2501.42	2294.28	345.023	148.145	266.036	777.781	342.687	689.161	1429.74	1446.49	1461.26
M213T332			0.576245	0.368837	3.33156e-05	213.037	332.495						11586.4	11091	8539.66	11662.5	14194.2	9607.69	5375.44	2145.8	3124.6	3624.76	4275.97	6048.05	7433.92	7557.23	7522.46
M962T79			1.08609	6.75843	3.40941e-05	962.344	78.832						1559.96	12329.4	7485.76	388.727	3487.75	1564.9	22934.1	25963.5	42827.2	24947.7	35855.7	28709.5	11045.2	9333.38	9835.58
M489T168			0.51889	0.23449	3.49933e-05	489.488	168.442						8032.61	8347.74	4685.12	9319.4	5574.25	7522.82	1208.44	860.485	2625.71	2193.49	959.376	2348.6	4297.87	4137.78	4293.65
M358T169_1			0.426676	0.278683	3.67777e-05	357.979	168.685						5498.23	6249.8	3933.68	6457.61	4457.19	5498.01	1104.71	1334.67	2757.33	1226.67	198.408	2322.39	3308.48	3091.47	3303.6
M328T168			0.445313	0.242974	3.72095e-05	328.482	168.375						6656.06	5899.57	3306.79	6257.26	4680.05	5798.62	639.204	799.197	2351.46	2002.53	645.283	1482.88	3098.45	3098.45	3134.36
M1037T423			0.191334	3.13063	3.72537e-05	1037.14	422.612						252.529	186.629	441.632	682.887	286.937	274.017	1324.96	1005.72	960.876	927.726	1372.01	1060.13	532.246	591.291	592.156
M339T360			0.354923	0.296604	3.75211e-05	339.035	360.129						4058.34	4377.53	2485.33	4397.91	2955.44	3417.79	905.75	721.554	646.355	1676.32	1051	1433.04	2442.72	2442.73	2426.12
M510T310			0.242188	2.84688	3.83437e-05	510.266	309.778						441.747	905.286	1226.78	448.166	409.645	384.976	1830.31	2049.73	2001.72	1890.61	1510.95	1582.06	1013.63	1093.47	1094.29
M158T410			0.189851	0.416349	4.11083e-05	158.009	410.046						1398.78	1544.08	859.665	1380.17	1305.51	1199.27	569.889	541.375	518.3	719.944	507.111	344.059	808.698	797.496	808.696
M570T33			0.487671	2.73433	4.23376e-05	570.46	32.616						2790.7	2463.69	2869.31	2820.55	3951.78	3022.27	8655.13	9024.03	10740.1	6963.09	8011.83	5600.29	2224.4	2256.54	2256.42
M504T360			0.166026	0.445144	4.26866e-05	504.08	359.964						868.989	1149.15	893.813	1143.08	1130.31	865.686	397.612	286.669	334.063	579.629	465.351	630.255	762.544	767.054	749.173
M491T168			0.456889	0.203904	4.29347e-05	491.485	168.476						5876.76	6432.1	3201.5	6935.51	4703.31	5645.08	568.997	898.767	2516.11	981.723	341.858	1379.43	2946.74	2852.93	2946.98
M281T47			1.37895	3.55031	4.30963e-05	281.095	47.347						7862.92	16388.1	36219.2	14356.9	9306.25	5695.49	53218.6	42287	55015.6	52540	66130.2	49728.9	25763.8	25787.7	21450.7
M361T30			0.646321	0.267014	4.37953e-05	361.058	30.45						13713.3	10725.2	7249.59	12121.2	12598.2	12175.3	120.541	3821.89	2905.13	5891.93	1866.71	3706.35	7829.02	7547.6	7548.53
M733T173			0.309395	1.78418	4.5672e-05	732.536	173.142						1946.2	2343.3	3231.28	2370.5	3800.43	2359.77	4361.59	4964.25	4459.3	5067.64	4914.34	4871.63	3313.18	3362.15	3313.9
M293T3			0.326728	2.17267	4.57607e-05	292.89	3.036						1881.28	1874.1	1822.29	2771.27	2330.32	1166.97	4425.64	4450.15	4981.43	3680.1	3383.69	4816.93	3001.08	2836.29	2998.89
M865T422			0.277014	3.17454	4.60019e-05	865.131	422.386						843.762	541.005	1199.76	163.567	524.918	1216.11	2603.12	2626.42	2212.91	1616.29	2704.62	2487.55	1505.8	1533.82	1534.43
M447T53			0.896642	5.70631	4.67004e-05	447.122	52.678						7868.88	4422.85	5295.99	1786.06	2256.31	831.767	11767.9	25081	18655.3	28424	21115.3	23130.8	13892.8	13798.1	11205.5
M391T331			0.546082	0.283395	4.80947e-05	391.104	331.327						10366.8	7686.58	6032.35	7541.28	10834.7	8268.72	2822.93	571.375	1783.71	2255.77	2752.79	4190.19	5532.98	5449.1	5532.67
M194T168			0.554281	0.51573	4.91819e-05	193.978	168.049						16353.9	15211.2	11776.4	12945.9	11546.7	14698.6	6526.56	6725.02	8317.42	7199.77	4924.47	8871.42	10733.6	10449.8	10731.5
M484T285			0.298999	4.63154	4.97036e-05	484.348	285.384						185.551	405.984	898.458	1185.95	191.701	241.649	3172.82	1989.11	2228.29	2913.63	1802.92	2294.06	1073.34	1132.85	1072.35
M484T175			2.00698	6.30479	5.09949e-05	484.264	175.265						1870.41	13184.3	63779.4	10767.5	1493.33	2403.58	74615.9	106092	117840	116789	86008.7	88142.7	51004.9	52632.7	50987.4
M394T140			0.704733	3.31568	5.13699e-05	394.257	140.116						3496.29	2054.67	9112.52	1317.9	3914.14	8090.32	12253.4	18544.6	16701.7	13475.7	15806.4	16010.1	9720.45	10291.3	10300.2
M897T176			1.99205	5.84205	5.24695e-05	896.538	176.127						5015.34	12800.8	66868.3	4440.04	2587.27	4647.81	78060.3	105080	79850.7	90737	109428	99782.4	57015.6	57014.3	56813
M1099T228			0.162318	2.78269	5.3637e-05	1099.45	228.143						358.095	312.685	372.061	164.856	503.619	209.005	1183.33	898.232	716.639	792.191	784.062	969.197	900.509	894.69	943.399
M357T168			0.737588	0.394234	5.41329e-05	356.981	167.838						19446.7	23934	13834.6	21757.8	15418.6	18267.5	5586.95	7109.13	9735.22	7615.5	5482.59	8884.76	12025.6	12025.6	12289.6
M652T226			0.335605	3.70731	5.516e-05	652.402	226.153						585.074	1254.49	1513.9	996.37	398.856	331.767	2271.51	2880.74	2714.22	3536.12	3194.59	4237.66	2608.95	2412.04	2604.97
M902T175			1.12689	6.21034	5.53947e-05	901.573	174.664						377.114	5145.13	20131	1507.65	504.074	1010.11	24769.3	33295.9	24800.8	26233.5	34324.9	34657.2	18603.1	18890	18897.1
M728T307_1			0.25566	4.01733	5.92794e-05	728.286	306.577						310.354	647.543	798.873	238.083	289.726	432.155	2059.3	2015.33	1199.49	2061.09	2282.46	1296.35	983.102	1000.71	983.2
M223T305			0.450843	0.261433	5.95721e-05	223.133	304.908						5565.7	5384.76	4300.8	5769.13	7977.22	4746.15	774.824	681.653	745.069	1954.21	2738.97	1927.01	3108.65	3112.74	3517.74
M711T385			0.266994	4.20214	6.02624e-05	711.402	384.617						70.7338	573.309	1319.7	438.768	146.998	40.1572	1821.34	1886.16	1578.63	1921.29	2019.36	1655.39	1296.19	1227.8	1227.46
M353T168			0.429491	0.490775	6.034e-05	352.987	167.569						7210.34	8742.38	6696.86	9526.27	6518.83	7722.8	2779.66	3603.37	4607.28	4333.81	2837.36	4619.07	5877.65	5924.29	5923.84
M359T168			0.503934	0.443617	6.04705e-05	358.978	167.838						10317.1	11577.9	7414.61	11366.1	8075.36	9249.27	3145.42	4309.87	5385.78	4824.97	2977.16	5086.68	6767.56	6626.31	6627.08
M771T65			1.30835	6.01797	6.12414e-05	771.286	65.27						4363.04	15878.9	11779.5	5992.31	2736.38	1134.15	33802.2	62835.6	47498.1	34559.9	41201.9	32160.3	13925.6	13908.5	14237.4
M127T189			0.720718	0.322624	6.18432e-05	126.935	189.261						20427.2	15738.9	9263.04	18673.9	16016.2	14459.3	3944.94	4751.75	4767.24	5701.12	6679.28	4668.95	14493.6	15123.3	15300.7
M273T332			0.468499	0.364854	6.28675e-05	273.058	331.966						7646.31	7721.88	5105.02	8076.63	9250.09	5855.56	3207.28	1457.78	1950.1	2954.93	2760.82	3596.95	4723.24	4769	4723.68
M599T441			0.194091	0.360113	6.31355e-05	599.044	441.421						1186.8	1092.38	716.277	1373.72	1293.42	1340.48	344.6	272.475	284.123	538.914	556.761	525.023	820.274	833.995	832.032
M448T66			4.45578	8.46276	6.35601e-05	448.134	66.187						10155.7	77966	211019	3142.83	7799.37	7320.99	458595	615531	549508	345935	427045	289503	172718	159369	159356
M395T140			0.423007	3.88628	6.38025e-05	395.261	140.453						163.174	415.86	1750.61	3358.04	991.803	1069.03	3849.12	6126.94	5213.54	4711.07	5478.16	4734.08	3475.65	3288.84	3288.93
M382T168			0.456483	0.237464	6.54342e-05	382.484	168.331						6383.67	7372.33	3602.84	6224.67	4783.6	6198.71	1037.86	663.411	2956.94	1279.97	335.112	1934.86	3033.15	2944.12	2940.69
M271T166			0.289516	4.47257	6.57235e-05	270.906	165.891						147.45	634.527	1112.97	455.238	481.688	157.478	2918.38	2257.76	2459.67	2051.15	1292.95	2390.16	1102.29	1134.07	1102.19
M198T168			0.454834	0.523045	6.93964e-05	197.972	168.183						11012.2	10494.5	7567.88	8660.63	8493.21	9800.96	4427.35	5360.79	5630.07	4526.02	3224.19	6137.49	7714.08	7598.02	7598.93
M421T329			0.435223	0.365649	6.96224e-05	421.073	329.364						7488.68	5279.92	5054.25	4781.7	7125.63	6567.09	2446.71	761.7	1773.58	2292.54	2683.42	3314.1	4191.27	4334.37	4193.07
M418T158			0.834681	8.16943	7.06624e-05	418.253	158.273						842.731	1577.54	5763.29	764.694	1165.71	1504.31	20164.5	22557.5	16097.5	10145.7	14819.8	11129.8	7956.98	8062.51	8075.41
M459T168			0.356461	0.185393	7.15106e-05	458.992	167.724						3135.97	4385.1	2051.59	3961.53	2565.64	3334.1	102.368	247.949	1378.29	877.737	187.343	809.224	2009.05	1915.87	1907.18
M824T365			0.218461	2.73702	7.19174e-05	824.446	365.201						448.925	858.402	997.649	325.603	288.74	442.92	1292.48	1820.36	1671.67	1557.06	1608.31	1252.62	856.379	804.004	802.569
M302T168			0.716841	0.434433	7.30162e-05	301.981	168.183						19089	21444.5	14283.1	23646.6	16620.2	19129.7	5045.13	9116.91	9848.12	9494.68	5531	10582.1	12621.4	12867.2	12620.5
M696T303			0.326678	5.10763	7.37189e-05	696.295	302.772						134.354	979.808	1452.36	190.344	126.211	335.464	2257.99	3503.94	3215.84	3167.94	2302.88	1990.56	1592.08	1615.69	1615.89
M678T188			0.43749	0.250354	7.57259e-05	678.212	188.309						7195.17	5950.84	5561.53	3169.68	5104.17	4798.92	653.845	1168.68	412.302	1777.95	1662.01	2281.54	3201.84	3297.53	3200.12
M393T426			0.272619	0.389003	8.00704e-05	393.042	426.394						3412.75	2943.4	2164.11	2592.85	2270.1	2156.19	625.804	1005.02	788.835	1576.62	862.714	1185.89	1899.91	1898.99	1820.87
M707T178			0.875795	3.38777	8.12115e-05	707.364	177.865						4279.34	4792.97	15082.1	3988.33	5502.43	6628.42	31377.1	23319.8	18665.2	21069	20332.8	21673.6	12028.8	12031.3	12155.2
M405T331			1.08557	0.256679	8.27443e-05	405.099	331.3						38003.7	27648.2	23274.3	29573.5	46785.4	31106.6	10966.2	2186.06	6421.95	7539.3	8885.09	14411	19700.2	19702.3	20293
M138T195			0.337745	0.268438	8.36532e-05	138.055	194.85						4012.08	3789.31	2717.48	3496.02	3208.91	2498.09	676.667	131.746	506.68	440.013	1690.17	1848.82	2105.08	2121.75	2105.08
M204T289			0.487689	0.558675	8.39104e-05	204.087	289.143						10972.1	11605.3	12305.4	12258.2	11769.7	10248.7	7057.14	4265.46	4214.8	7247.91	8631.94	7220.37	8405.63	8674.9	8405.1
M822T299			0.209874	0.531665	8.41446e-05	821.959	298.914						2197.39	2598.62	1844.55	1753.15	1849.68	1886.59	1288.83	1057.44	867.495	872.037	1174.25	1189.04	1951.79	1950.97	1919.68
M406T231			0.322437	3.44988	8.42263e-05	406.258	230.533						885.201	843.323	1596.23	444.795	606.965	805.548	4172.64	3376.87	2846.74	2140.53	2845.62	2495.07	1806.54	1827.55	1807
M790T295			0.208492	0.473577	8.53671e-05	789.991	294.877						1999.23	1967.47	1466.37	2050.44	2063.66	1426.75	1185.7	828.28	514.341	981.8	898.833	788.046	1461.34	1424.76	1441.95
M196T168			0.613094	0.525594	8.59198e-05	195.975	168.183						19998.5	18901.1	12768	16869.2	15650.9	18062.8	7588.85	7949.5	10973.1	9152.02	6978.59	11100.1	12835.1	12941.9	12835.3
M406T168			0.383112	0.443104	8.71743e-05	405.99	167.86						5298.14	6821.91	4617.91	6874.72	4975.41	5094.31	1837.28	2247.09	3229.92	3106.34	1543.44	2960.74	4265.05	4265.53	4307.79
M355T360			0.140772	0.500198	8.72506e-05	355.01	360.129						803.971	983.516	681.753	869.804	642.069	904.837	308.165	441.618	304.628	459.927	521.329	408.276	540.321	588.237	540.078
M421T360			0.185382	0.420243	9.02588e-05	421.026	360.194						1256.78	1482.64	963.039	1398.35	964.677	1114.41	375.563	414.875	318.045	719.095	563.656	626.069	937.092	913.295	937.024
M371T187			0.896356	6.16458	9.04036e-05	371.253	186.694						49.9291	3744.75	12721.4	1916.24	1059.93	257.237	12689.7	18908.9	25771.8	21053.1	19489	23834.5	12776.8	13178.1	12790.1
M421T65			2.34809	4.61989	9.10754e-05	421.115	65.274						11109.1	87762.3	61311.7	14890.4	3970.73	7914.1	106555	176804	165134	131608	157962	125664	70710.5	71293.4	71396.9
M465T168			0.551811	0.387662	9.27676e-05	464.984	167.703						10333.9	13016.7	7481.41	12947.4	8905.83	10252.8	3159.74	3824.16	5607.66	4643.21	2283.11	4880.78	7080.76	7080.64	6881.35
M431T152_1			0.809137	5.90505	9.42376e-05	430.99	152.003						963.152	2573.15	8734.06	535.596	1454.46	2349.59	21109.5	20563.9	9500.29	13681.6	17301.8	15925.9	9202.15	9196.71	8974.47
M569T234			0.390985	3.5339	9.50763e-05	569.365	234.102						1041.42	1358.26	3217.57	337.09	581.787	693.834	3547.77	4306.06	3542.1	4733.06	4744.4	4676.56	2856.52	2881.93	2881.64
M440T132			0.62867	0.227657	9.81303e-05	440.299	131.796						10430.7	11073.3	9825.11	8903.76	16901	8689.33	676.079	4307.87	1430.33	3021.7	3532.48	2016.65	6244.49	6872.41	6880.37
M825T39			0.473606	0.328441	9.95431e-05	824.54	38.8435						6997.12	6408.18	4532.58	7991.99	6151.67	9566.73	2186.6	1421.19	2033.31	3396.57	2558.09	2083.24	3795.67	3276.15	3266.62
M410T168			0.673662	0.423784	9.97921e-05	409.983	167.862						15038.4	20645.1	12566.7	20229.4	13616.8	16282.3	5586.08	6367.97	8084.09	7596.48	4970.19	9086.46	11118.6	11029.9	11088.7
M623T229			0.352924	0.299062	0.000101086	623.16	229.447						2445.1	4328.81	3097.68	5019.58	3844.68	3430.65	590.017	1044.95	932.836	1592.68	1730.07	738.622	3039.09	3157.84	3044.13
M317T415			0.280112	3.20283	0.000101489	317.182	414.946						221.226	1077	1287.59	1091.19	330.56	227.54	2365.87	2334.86	1646.36	2654.74	2513.36	2049.17	1303.28	1324.24	1318.87
M923T303			0.214404	1.40671	0.00010457	922.699	302.794						3046.81	2576.15	3205.75	2065.76	2517.97	2826.34	3760.58	3789.31	3922.02	3815.62	3562.55	3993.22	2855.4	2913.98	2855.67
M251T168			0.396609	0.513222	0.000105702	250.975	168.235						7223.49	8308.19	5480.16	7050.42	6479.84	7492.52	3046.77	2889.78	4535.09	3960.06	2394.68	4746.71	5417.06	5636.6	5412.99
M356T168			0.518098	0.285692	0.000107353	355.982	168.339						9663.14	9071.37	4968.91	9593.88	6393.3	8206.23	1568.61	2020.88	3855.03	2852.17	389.767	2997.26	4517.59	4387.12	4432.4
M329T169			0.464925	0.25264	0.000108851	329.481	168.788						6508.8	7923.99	3819.81	6922.85	4721.92	6548.59	1517.84	387.587	2647.24	1873.15	344.587	2437.31	3665.41	3432.49	3663.67
M489T227			0.609167	3.84404	0.00010888	489.223	227.257						2544.22	2326.62	4522.43	1956.46	2369.74	2631.55	10898.3	15189.9	6859	7795.44	10724.1	11387.1	5389.01	5249.9	5385.84
M418T132			0.653994	3.40015	0.000109453	418.253	131.858						2820.65	4299.05	6354.84	3541.24	1629.64	3521	13343.6	14983.2	17046	8591.37	10093.6	11311.6	6920.13	6791.45	6790.43
M540T229			0.677838	2.51598	0.000110372	540.232	228.752						7097.28	4049.42	10220.6	1475.71	8665.24	7560.48	18845.4	16788.6	12404.8	15256	18032.4	16969.1	12050.3	12049.3	11859.7
M1094T180_1			4.1163	3.44193	0.000110448	1093.65	179.622						163565	83114.5	328132	6085.24	140893	128606	540420	563110	363783	424403	583286	451998	307637	310876	307653
M609T382			0.262547	0.449438	0.000111424	609.185	381.69						2725.16	2773.87	1720.76	2876.49	2966.53	2193.06	1037.09	1054.73	710.865	1291.95	1225.28	1536.66	2016.9	1846.97	2019.74
M97T118			0.926674	2.50124	0.00011205	97.0403	117.877						5308.09	17615	19116.4	10808.4	9619.61	6840.52	31341.7	28632.5	34733.2	22773	28841	27034.7	17268.4	17589.4	17276.5
M346T448_1			2.1406	2.18632	0.000112654	346.054	448.261						92110	81545.1	120840	30700.4	77256.3	94633.3	205279	172668	167130	140677	206739	194292	121854	127348	127326
M461T168			0.5113	0.394554	0.000113252	460.99	167.862						8909.17	11894.9	7052.86	11006.3	7714.92	8594.36	2614.7	3483.75	5189.36	3811.38	2035.8	4633.55	6353.97	6271.54	6271.32
M282T286			0.126863	0.749407	0.000114117	282.032	286.025						1415.36	1541.69	1560.45	1585.06	1493.18	1418.16	1147.81	1011.11	1004.89	1350.23	1054.59	1186.45	1552.39	1549.44	1462.38
M893T63			0.675699	6.89022	0.000118748	893.412	62.5815						726.509	2654.04	1980.07	2970.48	905.053	433.909	7931.13	14494.5	6308.96	9382.63	14206.6	14305	5997.08	5993.36	5733.68
M184T220			0.451284	0.289039	0.000119622	184.061	219.862						6542.33	6198.04	4043.06	7223.96	7513.49	4177.44	1128.33	1204.76	759.712	2862.11	2280.73	2082.55	3692.36	3735.61	3692.13
M133T229			0.542301	0.397339	0.000121176	133.05	229.235						14584.9	10343.1	7825.48	10367.8	10015.9	9123.67	4207.39	3982.04	2247.39	5257.46	3879.39	5165.02	7680.52	7680.1	7557.82
M753T137			0.579628	2.42896	0.000123555	752.556	137.358						4981.46	3626.48	7823.17	3151.09	6821.94	4301.78	9215.53	12906.7	11409.1	16325.9	12500.8	12225.2	9079.54	9052.14	9349.96
M560T62			0.614123	0.214312	0.000125152	560.235	61.5375						12871.5	11780.5	14080.3	13512.2	7524.65	5939.61	1224.62	2491.92	2589.82	1842.3	3646.62	2286.88	7540.95	7539.68	7662.01
M1037T301_1			0.254221	1.52627	0.000125632	1036.71	300.864						3265.46	2774.15	3310.86	1948.19	2697.24	3565.25	4421.38	4739.07	4099.94	4610.12	4560.29	4372.23	3686.08	3759.45	3624.04
M742T37			0.98096	0.592231	0.000126981	741.524	36.9395						49718.2	63897.3	64700.5	64139	63869.5	55177.7	43187.7	26116.9	46235.1	33029.2	29865.1	35658.9	61884.8	56075	61956.3
M312T37_2			1.06425	3.24177	0.000133644	312.297	37.0325						16275.7	7018.26	9114.06	3602.99	18752.8	13869.4	29331.6	43962.9	39091	39443.8	46673.7	23990.2	19700.1	18569.5	18407.2
M516T168_1			0.588081	0.334049	0.000134822	515.99	167.838						11155.1	13624.6	7203.53	14047.2	8828.52	9942.32	2019.9	3312.35	4775.1	4129.04	2509.15	4901.28	6728.67	6573.21	6734.63
M600T230			0.590185	2.52652	0.000135326	600.241	230.042						5198.55	3334.91	8619.6	1985.67	5556.89	3264.65	11793.9	12352.4	9139.4	10782.6	14276.9	12297	7735.02	8070.62	7727.04
M430T189			0.942143	4.31984	0.000137977	429.987	188.506						3861.83	5217.5	14094.8	209.399	3699.3	6067.14	27481.6	33049.4	15988.1	19964	23228	23491.7	14095.2	14098.8	14640.8
M825T303			0.239392	1.41386	0.000138319	824.722	303.455						3687.05	3014.75	3789.99	2375.59	3266.06	3184.5	4767.35	4577.53	4422.8	4548.36	4247.75	4749.15	3709.7	3636.37	3636.02
M385T65			4.66444	6.03834	0.000143372	385.139	64.5965						14719.9	230640	230378	25634.5	25084.9	19605.1	380410	644906	722550	393703	693767	461978	250873	248629	250899
M190T332			0.481106	0.442573	0.000143723	190.464	332.456						7932.68	9427.67	8120.05	9151.87	9643.37	7337.18	3907.22	1587.58	2038.15	4744.25	4302.19	6263.07	6171.84	6169.47	6052.42
M435T168			0.397308	0.246232	0.000144489	435.486	168.421						5151.94	5813.16	2990.43	5360.26	3453.13	4491.8	627.6	836.681	2624.34	1517.63	131.124	975.085	2738.38	2631.98	2683.61
M448T104			2.47384	5.8217	0.000146495	448.134	103.639						9544.03	59056.4	56044	7943.73	14143	5899.48	184128	194409	184958	119660	103131	102283	53745.7	51536.7	53760.6
M779T155			0.557525	5.72646	0.000149821	778.575	154.844						274.614	3866.87	3297.57	79.917	308.809	224.614	5963.19	11499.9	6971.79	7506.63	7623.36	6546.88	4198.8	4197.16	4111.32
M1127T137			0.532503	0.232207	0.000153803	1126.71	137.166						5953.65	9932.69	4704.45	8285.34	10645.2	8008.79	1037.29	1292.35	3167.94	1510.89	724.889	3303.46	6564.87	6450.43	6564.49
M756T303			0.146497	1.91976	0.000154662	755.766	303.432						491.258	285.039	654.777	761.796	390.155	776.638	1091.71	1119.95	1036.15	1151.42	956.194	1094.32	543.781	649.922	650.54
M464T192			0.547337	0.151407	0.00015696	464.175	191.619						4588.37	8619.41	8059.09	11743.3	7942.5	5004.44	994.055	495.817	460.047	1014.18	2173.14	1820.98	7861.28	8397.69	7864.66
M805T288			0.260792	6.94379	0.000159548	805.456	288.153						81.2224	565.45	330.393	287.736	146.165	35.395	1557.7	2552.74	1572.04	2103.69	1242.04	1015.02	755.606	729.174	729.155
M221T428			0.372299	0.474589	0.000161177	221.03	427.515						6360.53	6816.14	4975.68	6086.19	6299.22	3948.03	2609.17	2823.11	1617.02	3574.03	3190.85	2552.41	4632.75	4632.09	4808.43
M516T231			0.327687	2.25283	0.000161945	516.235	230.618						2170.32	2653.07	1247.62	1709.57	1660.09	1887	4405.01	4836.79	2608.57	4155.22	5041.92	4471.77	5534.59	5867.02	5537.18
M576T83			4.65583	6.26904	0.000161996	576.197	82.773						8394.47	277881	209725	5419.82	8424.61	7308.58	356826	755998	636628	526196	545954	420452	295216	294794	312308
M1058T180			0.462331	4.01789	0.000163013	1057.65	179.622						1929.12	849.402	3010.13	226.733	1337.12	1832.9	6307	6085.26	3103.67	6180.83	8120.43	7108.8	4469.14	4144.61	4135.22
M340T51			0.601258	3.12895	0.000169096	340.081	51.348						5567.99	6024.07	4376.13	530.872	2589.46	3204.75	8656.02	12487	9301.2	11643.3	16058.5	11608.4	6637.74	6712.6	7167.34
M371T290_2			0.51592	3.28138	0.000170517	371.264	290.082						331.115	4735.67	4425.02	2810.25	806.706	721.639	6400.51	7932.72	6637.74	9046.43	8271.63	7093.71	4994.76	4994.65	4977.74
M275T333			0.318369	0.442177	0.000171633	275.038	332.572						4072.96	3836.41	3253.82	3776.8	5496.2	3471.23	2084.49	1044.89	1671.06	1647.64	1601.95	2521.29	2980.86	3017.7	3139.92
M601T317			0.229999	0.387112	0.000176241	601.095	317.376						1610.58	2256.51	1206.16	2188.84	1748.13	1491.86	619.261	593.197	376.703	962.091	810.025	704.208	1135.09	1149.15	1211.55
M669T139			0.630145	5.73101	0.000176839	669.429	138.578						849.052	2678.1	5075.19	1237.83	313.986	490.07	6007.77	15298.3	10653.6	10686.5	8706.94	9649.06	6426.37	6329.16	6328.63
M950T190			7.27507	3.27612	0.000177731	949.533	189.731						757443	168930	901909	11949.2	574873	535587	1.76717e+06	1.87233e+06	1.15906e+06	1.36268e+06	2.02134e+06	1.48424e+06	1.01024e+06	1.01021e+06	979419
M368T419			0.329852	1.93453	0.000178017	368.036	419.371						2871.27	2100.35	3256.33	1270.19	3019.83	2897.41	5554.23	5177.13	5497.47	3701.07	4697.19	5194.52	3494.47	3536.65	3536.96
M468T38			3.07998	5.80699	0.000184712	468.269	37.511						25448.1	30127.9	142653	7480.06	9668.33	35060.5	149930	262837	215770	263020	208786	353944	127703	130036	130045
M490T169			0.486306	0.258673	0.000185832	490.487	168.51						7151.13	8362.53	3728.82	8798.5	4988.85	7278.76	1504.5	1078.16	3039.64	1973.43	859.335	1971.69	3973	3973.15	4013.57
M958T116			2.08899	4.74548	0.000189759	958.314	116.06						2532.63	60675.5	66655.4	2455.49	4171.51	1976.24	101177	124798	122979	86539.2	131336	90262.3	67369.7	67526.9	73010.4
M609T292			0.214464	2.41062	0.000190555	609.37	292.461						428.408	708.796	1313.63	720.794	307.607	461.985	1838.47	1401.48	1489.35	1557.71	1720.28	1493.48	1162.02	1188.19	1188.06
M518T168			0.545843	0.335063	0.000191368	517.987	167.954						8081	11534	6077.83	12461.6	8592.32	9717.46	1975.55	3150.02	4353.04	3530.06	1323.44	4586.97	5901.73	5990.23	5938.33
M353T158_2			1.33795	5.94624	0.000194418	353.243	157.809						2122.14	5134.38	29420.4	2457.13	2622.81	2782.56	28973	61622.6	39709.2	44147.2	38319.3	52070.9	25863	28836.9	28838.6
M442T287			0.193322	0.500502	0.000194573	442.119	287.416						1729.71	1638.53	1176.5	2139.29	1422.59	1467.73	912.313	776.41	624.753	814.006	820.602	843.899	1028.14	1026.42	984.456
M357T192			0.706401	5.64179	0.000195585	357.238	192.207						337.833	2102.48	8219.74	1658.84	533.347	198.632	9859.23	17422.6	13283.1	10597.6	9150.82	13316.9	7546.78	7593.54	7502.36
M213T108			1.04978	0.153722	0.000198275	213.016	107.838						46931	26086.4	31664.1	16591.7	22679.7	27373.4	5842.1	5400.96	4805.79	3980.89	3440.24	2866.68	16306.3	15611.4	16309.4
M408T168			0.613563	0.420097	0.000198294	407.987	167.703						13327.4	17183	9223.7	17294.8	11953.8	13253.5	4494.48	5845.17	7354.74	6186.5	3727.77	6938.55	9804.12	9803.9	9887.97
M725T32			0.682496	4.30055	0.000198954	724.556	32.43						386.02	4038.81	7344.54	2815.71	1708.27	730.835	13684.4	13519.9	16707	9568.86	11524.2	8208.97	4441.67	4221.71	4452
M587T147			0.35074	2.04044	0.000201947	587.257	147.179						1577.37	2799.78	3223.75	2912.7	1962.27	1946.85	5512.54	5387.68	3919.76	3702.71	5386.89	5519.13	3180.52	3030.49	3178.8
M749T155_2			0.900325	4.93108	0.000202014	749.325	155.267						3543.28	2739.84	11377.1	1280.87	3084.09	3442.66	28931.3	26832.7	15264.9	13829.8	22800.6	17924.6	11375.8	11744.1	11748.7
M747T25			0.262507	1.91343	0.000203137	747.309	24.636						948.585	2321.38	1732.67	1964.49	1465.57	919.545	3189.95	2967.07	3025.32	3151.55	2495.91	3065.11	2412.45	2244.07	2247.37
M488T169			0.457637	0.253415	0.000203949	488.49	168.529						6571.54	7781.17	3486.92	7219.91	4796.33	6300.06	1119.62	859.387	3366.94	1664.27	192.045	1960.19	3156.21	3155.8	3116.03
M133T244			0.37948	0.446566	0.000208506	133.05	243.891						7795.25	5987.61	4865.68	5968.35	4998.26	4634.98	2473.67	2098.81	1476.31	3172.18	2687.91	3386.06	4443.68	4549.97	4443.62
M715T419			0.206005	2.89897	0.000209719	715.1	418.918						625.094	157.654	656.227	45.7821	763.328	680.926	1597.09	1480.64	1627.87	926.144	1524.38	1334.99	748.448	748.07	712.392
M422T296			0.24306	0.340941	0.000211845	422.11	295.795						1566.66	1973.37	1807.17	2326.44	1978.85	1386.25	453.321	270.301	205.49	1176.05	597.907	1060.5	1112.93	999.66	998.837
M302T142			0.332244	0.344367	0.000213248	302.095	141.764						2724.94	4107.63	3399.09	4560.81	2912.15	5380.48	1596.51	1389.86	1404.64	1085.76	1768.48	704.5	2837.41	3096.14	2837.18
M867T300			0.213347	1.66417	0.000219405	866.789	300.499						1821.39	1383.31	1779.29	1014	1909.95	2279.16	2971.3	2675.41	2543.5	3071.54	2689.29	3002.03	2358.89	2358.83	2285.46
M905T303_1			0.204745	2.64754	0.00022017	904.722	302.806						646.203	282.546	866.661	59.3177	586.15	1136.86	1619.36	1724.86	1670.19	1679.74	1235.55	1542.51	1040.17	1065.89	1065.88
M267T381			1.21931	0.348595	0.000220267	267.072	381.388						48784.9	46889.9	26027.3	50089.1	62149.1	42805.7	14370	11927.4	8434.26	22932.3	16805.9	22002.5	30100.1	30601.8	30100.9
M597T145			0.732521	0.256172	0.000223492	597.216	145.007						14989.7	18010.9	10359.7	21899.8	10636.8	13243.2	2095.27	1676.22	3253.33	4788.47	4641.01	6380.89	9481.18	9560.9	9479.1
M514T32			0.867534	0.26896	0.000224297	514.11	32.319						23703.1	14049.8	11328.9	22630.6	27545.5	24761.7	3004.12	6015.45	5026.6	6522.36	6166.33	6621.47	17782	17764.9	17161.5
M763T129			0.616342	1.76534	0.000226738	762.581	129.309						13788.4	8859.41	10211.8	10634.3	13064.5	10588.9	25569.8	19998.4	17275.4	19219.4	20220.9	16253.9	10799.8	10238.6	11620.8
M1099T178			1.82813	3.75192	0.000229216	1098.68	178.285						26394.5	14889.3	63326.7	1881.37	27216.6	18278.7	98073.9	101958	53259.5	91123.1	117532	108296	63152.6	64875.1	63184.5
M807T65			0.699276	5.45043	0.00023072	807.262	65.218						4393.95	3863.59	2536.11	963.359	2256.53	1047.44	9611.9	15894.1	20633.8	11683.7	16084.6	8180.82	6645.87	6351.99	6650.27
M954T187			3.95696	2.88287	0.000230858	953.562	187.304						262758	73645.7	313223	5858.39	217707	186566	542601	565639	382489	433656	620939	509824	350246	350985	350246
M190T64			6.30632	6.4756	0.000235369	190.05	63.6355						16292.9	393623	477383	1597.14	14891.5	20186.3	630294	1.05799e+06	1.21718e+06	686110	1.39854e+06	993168	408038	426224	407642
M586T426			0.15058	2.33411	0.000237939	585.953	425.609						384.264	421.063	499.525	90.5745	345.472	486.766	1093.02	859.802	915.167	613.742	796.627	921.269	602.128	715.851	715.902
M684T145			0.418747	0.602885	0.000239109	684.458	144.936						10259.7	8097.93	6799.12	9037.78	10572.7	10408.4	5297.03	4735.67	5796.63	5289.24	5924.53	6221.49	7588	7529.54	7529.55
M566T300_2			0.20788	0.616386	0.000243013	565.98	299.532						2494.74	3112.86	2120.27	2164.48	2257.66	2403.51	1663.89	1507.13	1161.2	1595.88	1629.46	1413.02	2140.37	2294.01	2295.98
M470T156			0.901054	3.18026	0.000244335	470.229	155.769						9826.16	5844.64	13962.2	3638.39	8964.05	10188.7	16665.4	34205.1	36799.5	25109.7	31089	22853.8	17433.5	17427.3	18246.9
M383T169			0.447576	0.239538	0.00024539	383.483	168.685						6808.17	6344.32	2842.69	6533.67	4416.44	6622.37	1356.97	171.609	2674.65	1898.62	267.426	1671.44	2695.72	2647.05	2882.89
M355T158			4.91963	8.61762	0.00025211	355.259	158.459						20112.9	67797.6	239186	20285.3	16487.9	26376.1	502370	921481	638911	348633	519424	432170	314477	314750	327967
M355T168			0.692694	0.429734	0.000260971	354.984	168.235						17553.4	22227.3	12740.9	23167.4	14497.2	18027	5632.49	6883.67	10490.6	8150.66	5773.57	9571.94	12367.7	12368.1	12464.4
M606T166			0.663515	0.251343	0.000265174	606.183	166.215						14066.2	11653.9	5802.83	14629.9	11527.9	16673.3	4318.51	4080.3	4803.34	3579.71	1004.69	901.845	7718.23	7800.23	7776.02
M555T425			0.22275	0.469574	0.000266067	555.073	424.59						2116.26	1992.81	1640.14	1896.05	1867.08	1789.85	442.36	450.166	668.852	1338.87	1301.2	1105.76	1399.44	1400.99	1398.58
M978T183			1.22728	3.03728	0.000271701	977.556	183.18						16564.1	12604.6	33513.6	558.769	17659.4	10367.6	49937	51816	33659.1	43013.6	57775.7	41005.6	29401.3	29385.6	29394.5
M207T427			0.245212	0.612904	0.000271752	207.014	427.06						2810.03	3267.73	3206.84	3791	2884.94	3322.08	1601.82	1705.4	1529.47	2071.08	2613.18	2297.47	3216.09	3651.12	3741.51
M675T343			0.308869	2.91789	0.000272866	675.331	342.813						388.816	1626.98	2059.22	730.469	596.13	537.432	2352.27	2745.63	2263.15	3244.88	3385.52	3338.03	1730.23	1675.92	1730.02
M598T302			0.582419	4.23711	0.000273936	598.319	302.167						151.51	2338.44	3657.38	833.402	7177.55	113.965	8210.47	12231.8	12062.6	9626.54	7116.5	11225	7129.74	6399.19	7134.6
M707T184_1			0.449132	4.66604	0.000278377	706.897	183.684						1219.95	729.15	2879.69	67.5876	1486.49	721.27	6220.27	6063.12	2556.08	4550.62	6607.92	7150.18	4739.84	4738.47	4788.69
M637T71_1			1.10926	3.21558	0.000278625	637.177	71.3845						14416	7483.7	27048.7	2468.05	13096.6	9939.15	34768.4	35713.9	56890.1	35663.3	43546.1	32825.1	15026.2	22672.7	22707.4
M599T159			1.1437	4.86035	0.000284561	599.327	158.571						1911.03	11184.8	16458.4	5775.99	2800.4	3319.68	29620.2	52287.4	37965.7	21571.6	29409	30609.3	19219.3	19470	19386.5
M765T86			1.43375	4.03978	0.000289675	765.239	86.278						4843.48	39946	28723.8	1535.54	5713.02	3057.91	45045.8	67246	68480.3	52096.8	59300.5	46443.9	34259.6	32503.3	34251.6
M313T250			0.347527	0.38922	0.000290578	313.152	250.286						4032.09	5495.32	3117.71	4685.87	4481.9	3237.31	535.447	1999.69	1704.24	2428.71	1032.83	2049.12	1977.35	1852.69	1983.18
M133T211			0.86565	0.180157	0.000293798	133.05	210.859						13146.6	27713	14618.2	28215.1	15833.4	14941.9	3569.73	2151.54	1920.16	3356.42	3947.44	5676.94	12130.3	12371.9	12369.3
M492T197			0.18118	0.503339	0.000296718	492.228	197.241						1133.17	1668.82	1403.11	1459.31	1288.29	1762.77	560.501	503.068	766.552	570.141	1074.02	912.547	1125.9	1028.49	1128.58
M615T235			0.357562	1.93301	0.000300652	615.253	235.111						3020.33	2220.35	4244.58	2583.93	2513.51	2641.43	5215.39	5672.4	4613.76	4485.89	6976.77	6330.22	3964.43	3965.76	4027.71
M1059T230			0.379169	3.2887	0.000300791	1059.49	230.002						1620.44	442.625	2852.59	34.2574	1757.04	1370.33	5149.19	4747.26	2702.04	3920.24	5290.91	4754.12	2935.97	2961.87	2962.38
M661T31			0.66785	0.208376	0.000301872	661.157	31.448						16047.9	11115.9	5491.86	15458.5	12959.5	9829.52	419.349	4767.96	1680.89	3871.29	1438.24	2596.79	8633.62	8575.13	8633.62
M1182T170			0.245444	2.11616	0.000309217	1181.86	170.216						1171.11	453.029	1526.91	1807.18	1017.32	1019.78	2531.34	2366.79	2189.89	2365.78	3161.13	2188.32	1826.87	1848.42	1824.38
M477T490			0.0830383	1.64263	0.000310091	477.075	489.89						265.321	253.271	278.986	142.083	250.33	248.521	444.18	368.944	397.11	311.246	443.834	397.631	284.255	297.299	284.553
M294T298			0.912944	0.413503	0.000312499	294.118	298.293						30356.6	43599	23133.8	31416.1	24463.8	27805.5	14973.9	12645.8	7900.33	9158.68	16340.6	13731.6	22385.4	22975.8	22396.3
M518T229_2			9.01759	3.43675	0.000315561	518.253	228.854						828389	284565	1.43304e+06	48451	948742	794287	2.91355e+06	2.72726e+06	1.40664e+06	2.06191e+06	3.106e+06	2.69146e+06	1.59921e+06	1.59918e+06	1.58107e+06
M544T169			0.328165	0.27213	0.000317127	544.489	168.771						3039.62	3701.09	1686.96	4023.99	2700.24	3607.5	421.946	1466.6	952.565	128.957	1607.16	527.765	1673.89	1596.54	1590.01
M473T391			0.297962	2.92317	0.000321595	473.271	390.525						478.675	1573.77	1392.97	1161.24	564.381	457.173	2040.1	3532.42	1995.44	2748.08	2697.13	3439.03	2172.97	2200.29	2172.99
M421T296			0.398454	0.30936	0.000324541	421.11	295.799						3697.29	6091.03	3656.99	6662.78	4702.53	3699.6	1156.64	1147.92	538.399	1408.38	2409.27	2159.33	3054.92	3054.92	3041.63
M541T229			0.379895	2.17041	0.000325094	541.236	229.422						2714.93	1889.87	4285.82	1030.03	3104.26	2727.34	5976.61	6010.41	4141.5	5452.88	6765.02	5842.48	4774.52	4775.38	5022.34
M189T286			0.27488	0.536226	0.000325153	189.039	286.377						3131.33	3737.59	3648.5	4728.68	3117.04	3392.85	2300.27	1477.76	1326.25	2592.93	1861.07	2107.85	2595.44	2882.61	2583.41
M263T67			0.593709	0.414459	0.000326886	263.127	66.658						9378.22	18249.6	12214.1	11334.1	14783.6	11458.8	2761.97	7035.06	5246.9	5569.29	5224.66	6248.86	12416.3	13462	12064.4
M381T428			0.331596	0.478619	0.000327341	381.042	428.332						4676.59	3989.39	3906.3	2867.36	4665.69	5091.29	1639.72	1302.42	1431.1	2533.01	2632.66	2520.65	2920.94	2991.2	2918.83
M141T168			0.454321	0.581249	0.000327657	140.975	168.183						14356.3	12298.1	10412.4	9298.03	9720.87	11074.4	6151.92	6387.41	7720.24	6036.96	5024.24	7715.98	9211.01	9260.59	9211.33
M563T182			0.715252	2.23681	0.000330673	563.312	181.836						12264.9	8364.3	10411	2289.02	11844.1	11268	25567.2	17896.7	17980.3	17304.7	25159.7	22339.7	17481.6	17761.7	17865.8
M385T318			0.25138	0.37633	0.000332402	385.171	317.94						1980.86	1749.49	2095.99	1275.22	2697.46	2686.36	782.208	706.832	510.307	1190.67	837.639	670.964	1200.06	1205.25	1180.79
M384T169			0.378975	0.277031	0.000335629	384.481	168.65						4314.82	5810.38	2689.24	4905.43	3177.87	4807.04	616.333	241.278	2238.08	893.534	2155.99	975.811	2194.31	2149.74	2192.96
M1040T419			0.193179	3.01681	0.000337771	1040.18	419.24						390.35	41.3364	544.674	676.978	305.51	390.944	1409.37	1333.12	1233.72	608.365	1323.62	1180.69	524.762	534.138	527.304
M361T433			0.336774	2.15397	0.00033815	361.065	432.689						1981.01	2286.83	3240.99	1011.66	1791.2	2256.2	4756.07	5306.62	5631.09	3666.39	3757.09	3953.62	3118.23	3117.79	3061.1
M825T365_1			0.193601	2.76712	0.000340492	824.947	365.299						192.774	361.094	812.297	822.584	241.22	246.427	989.898	1282.17	1366.05	1537.09	1240.98	989.72	757.12	785.102	784.917
M195T335			0.13745	0.561067	0.000340796	195.102	334.522						942.365	1190.62	1036.3	1150.64	837.93	906.127	686.903	358.466	599.818	756.863	440.563	559.685	759.774	740.859	760.416
M253T333_2			0.244756	0.639187	0.000341851	253.056	332.606						4072.61	4076.7	4110.98	3857.85	4785.3	3274.79	2807.82	1648.29	2643.74	2678.28	2831.66	2844.63	3439.38	3439.55	3402.07
M430T155			0.552029	2.91765	0.000345001	430.253	155.174						1334.2	3259.59	8184.45	2880.41	1181.82	1931.08	7947.52	10005.4	8335.61	9469.56	8766.87	10243.8	6420.45	6554.24	6421.07
M569T169			0.329757	0.154914	0.000345473	568.994	168.562						2775.31	3683.44	1027.3	3527.79	2472.29	2835.3	99.0114	134.333	1331.93	486.696	127.252	349.187	1238.18	1428.64	1233.08
M737T302_1			0.245476	2.57248	0.00034624	736.795	301.627						1429.88	416.52	1258.97	57.4439	795.217	1473.41	2058.08	2725.78	2385.62	2446.5	1881.79	2474.47	1224.9	1217	995.953
M947T107			0.561884	2.32248	0.000347633	947.297	107.35						7619.8	5118.75	7002.79	4536.93	3584.06	4374.06	14678.3	10745.7	16398.5	13464.5	10936.8	8644.6	7855.55	7723.19	7265.09
M1043T229			0.487009	5.86743	0.000353847	1042.54	228.793						1132.09	253.391	2547.69	35.695	1483.86	954.309	7050.24	7177.01	2480.22	4810.57	8633.13	7441.67	3246.42	3246.31	3134.7
M115T305			0.532829	1.28026	0.000353919	114.98	304.783						28487.6	21307.2	26175.6	22421.1	27614.1	26210.7	30540.6	34718.4	31693.1	33982.9	31351.5	32589.9	27974.7	28404.4	28408.3
M725T137			1.38698	2.90666	0.000356078	724.527	136.919						34631.6	10643.2	23449.3	8819.48	30320.9	28171.8	56098.3	91932	43306	61747.7	77597.6	64729.6	40319.9	40323	38165.8
M469T149			0.552198	0.48893	0.000357613	469.338	149.443						13408.3	10326.5	8722.96	17123	12823.5	14122	5035.93	6526.44	6625.46	6320.4	6001.55	6906.1	4660.79	4653.57	5046.68
M385T441			0.21985	0.468287	0.000359548	384.98	441.161						2428.51	1530.99	1251.7	1969.1	2113.84	1943.72	760.348	688.178	842.926	1123.07	737.518	1110.5	1298.45	1298.5	1325.84
M413T274			0.181447	3.2383	0.000361074	413.264	273.62						66.6099	296.874	584.975	127.02	727.934	101.135	777.844	1289.16	893.734	1119.14	1059.61	1027.99	696.421	670.522	696.302
M643T283			1.49067	3.34576	0.000361979	643.31	282.729						29841.6	7310.7	36382.8	4477.68	20169.2	26904.2	67909.3	87821.4	37170.2	63653.1	87703.9	74250	45808.3	46303.7	45809.6
M520T352			0.229536	2.41475	0.000362319	520.275	352.423						468.936	1047.12	1220.3	732.047	542.029	566.29	1735.65	2353.84	1425.21	2160.16	2002.44	1374.32	1746.62	1905.61	1746
M502T463			0.221547	2.05942	0.000365618	502.225	463.36						718.156	916.166	1191.51	1590.82	614.969	553.776	1969.64	1884.56	1529.47	1835.31	2136.8	2146.9	1634.39	1633.94	1613.21
M373T412			0.267873	2.20783	0.000369349	373.207	412.316						680.625	1931.84	1691.18	1563.98	759.454	526.2	2729.57	2533.68	3014.98	2666.26	2716.26	2132.47	1587.23	1619.35	1619.48
M319T333			0.19361	0.343237	0.000369795	319	332.56						1296.79	1086.36	1027.74	1467.46	1944.21	1073.21	760.222	174.711	401.746	382.647	408.149	582.647	956.052	928.129	957.037
M393T160_2			0.523425	3.81516	0.000371366	393.233	160.175						700.873	3033.43	5428.24	1434.68	443.991	798.635	5507.69	10617.5	7976.93	7438.19	6829.53	6801.05	6159.08	6157.58	6394.76
M79T119			0.595703	2.60353	0.000371624	79.0298	118.935						2173.55	8376.04	8266.84	1025.21	5112.98	3071.25	12498.9	11310.4	14693.2	10027	12560.6	11876	7202.86	7454.25	7209.17
M1038T229			0.952332	6.02725	0.00037256	1037.51	228.903						4427	1318.34	9132.21	31.6278	5386.43	3644.24	30166.4	28947.6	9408.59	18118.3	32672.5	24977.9	10895.6	10895.3	10713.9
M810T281			0.197231	2.62618	0.000373188	810.401	280.826						524.966	660.165	810.353	298.073	532.389	269.34	822.717	1240.98	1190.11	1646.94	1555.37	1672.67	1021.39	1052.35	1052.41
M514T168_1			0.461071	0.294054	0.000375513	513.993	168.442						6399.24	8060.58	4016.58	8729.11	5281.7	5812.52	740.784	1411.22	2937.29	2657.15	452.268	3063.49	4171.44	4230.36	4170.77
M554T44			0.84626	3.81608	0.000378641	554.317	44.115						2220.16	2767.58	12011.4	10808.1	2249.9	832.516	23123.4	19200.2	17310.9	12272.4	25706.3	20264.6	6988.87	8862.56	8936.46
M412T244_1			0.261898	0.510726	0.000380223	412.107	243.727						2332.41	3238.55	3533.72	4521.57	3630.77	2918.92	1797.53	1918.44	1820.01	1444.9	1432.95	1890.55	1635.8	1644.19	607.765
M171T114			0.352934	0.391335	0.000385044	170.996	114.362						5434.88	5500.43	2841.81	4644.06	4278.68	3792.74	1480.79	2832.59	1284.35	2350.98	1639.65	779.123	7749.23	7750.4	7655.19
M520T168			0.3944	0.335901	0.000391862	519.984	168.43						4526.88	5928.04	2818.8	6699.16	4310.92	4671.42	910.863	910.62	1795.14	1816.61	2677.08	1615.76	2961.38	2934.72	2935.39
M313T331			0.192307	0.526559	0.000392327	312.993	330.61						1703.69	1798.33	1145.54	1461.1	2110.89	1594.42	858.165	589.776	768.975	955.348	1040.72	954.653	944.734	837.718	942.964
M541T441			0.148527	0.478321	0.000399637	541.016	440.742						1018.06	662.444	575.656	853.805	941.598	1017.35	343.62	382.4	297.309	427.495	414.252	559.488	581.427	586.836	581.484
M536T298			0.206983	0.36839	0.000399764	535.972	298.46						1534.3	2146.56	1092.67	1383.27	1502.18	1223.12	628.332	863.897	418.465	391.15	750.007	220.223	1220.56	902.827	1219.53
M354T168			0.325748	0.249486	0.000399962	353.985	168.331						3149.15	4058.87	1232.26	3343.74	2838.36	3362.09	867.987	342.881	1533.7	643.723	249.038	849.542	1412.04	1403.12	1646.91
M133T186			0.795282	0.294085	0.000408817	133.05	186.228						19488.4	26587.7	13126.6	18851.7	12080.7	22972.6	3368.3	5380.75	3551.22	9700.6	2841.31	8421.06	10709.5	9738.72	10723.8
M468T107			3.66162	5.88642	0.000409696	468.269	107.042						19013.2	69837.7	191821	22726.6	19512.5	22862.7	257473	309592	214915	369634	342068	541686	185434	196605	196896
M1102T179			0.785994	2.58798	0.00040997	1101.7	178.908						9477.19	5308.3	15961.9	1194.71	9856.84	7929.94	24926.5	20684.9	16271.8	18314.4	26010.8	22488.6	14653.5	14823.1	14825
M441T173			0.869862	4.00179	0.000412614	441.306	173.142						678.016	7105.52	16200.8	3931.64	1358	969.023	12911.5	21820.1	18897.2	22276.2	23934	21187.4	12076.3	12740.2	12734.8
M270T432			0.227813	2.05721	0.000416914	270.12	432.241						802.829	1049.17	1784.75	862.877	664.07	959.675	2011.01	2313.48	1572.51	2528.33	2060.22	2111.52	1408.53	1391.06	1408.47
M903T302			0.184345	3.49989	0.000420402	902.737	302.138						371.936	116.558	591.836	55.3687	189.052	529.277	994.319	1409.15	1380.54	982.952	625.687	1096.25	394.866	461.155	391.034
M395T425			0.230877	0.496383	0.00042201	395.057	425.068						2613.62	2273.54	1810.28	1628.26	2120.81	2489.1	1013.35	724.775	621.638	1480.95	1328.35	1251.95	1690.06	1690.02	1658.38
M661T58			0.863247	0.396293	0.000423394	661.248	57.958						36176.4	23863.9	19003.6	34625.3	26185.6	22714.7	6622.59	14394.5	9868.35	15964.2	8933.58	8642.07	18570.7	19141.9	18566.6
M402T90			0.548839	3.03209	0.00042433	402.247	89.8845						742.21	978.113	7161.1	3243.86	3778.1	3411.51	8018.47	8613.25	8753.63	13011.1	8502.6	11665.5	6527.52	5928.17	6513.6
M639T82			3.08014	4.93415	0.000426023	639.192	82.358						22089.5	112371	140293	5523	16654.4	11541.7	175532	318878	322876	277321	283865	143576	85473.1	92268.2	85561.4
M644T380			0.41199	5.04877	0.000427277	644.288	380.274						390.291	1751.55	1477.93	1049.98	504.31	369.253	5374.87	5348.92	1499.74	4434.43	6360.09	4968.89	2492.88	2492.7	2568.98
M885T142			0.51647	0.47235	0.000427765	884.528	142.386						12564.8	10880.2	11635.3	5746.54	11360.4	11238.5	5060.27	4275.82	4427.96	4588.69	4528.82	7077.59	8536.12	8652.71	8654.01
M868T184			0.287745	1.76054	0.000428623	867.537	184.449						3436.06	2807.61	3445.73	1386.03	1797.65	3052.18	4026.32	4458.84	5161.95	4560.86	4973.64	4855.42	4025.37	3740.42	3733.7
M438T169			0.348207	0.142752	0.000429825	438.482	168.996						3310.07	3950.57	809.457	3707.79	2412.34	3337.93	285.848	284.769	954.386	417.534	325.271	234.363	1216.46	1216.41	1242.89
M542T424			0.239684	1.74379	0.000430981	542.056	424.498						1605.9	1799.72	2336.76	960.91	1905.26	1789.57	3206.22	2534.9	2824.63	2654.74	3602.91	3308.72	2598.53	2598.81	2539.11
M533T426			0.123602	0.591693	0.000435598	533.049	426.44						1037.83	821.969	947.594	846.106	699.041	783.975	390.002	677.36	444.977	425.959	618.006	482.938	614.247	614.844	648.919
M681T292			0.271084	2.65045	0.00044694	681.264	291.712						1465.06	815.956	1575.3	210.324	895.33	1106.21	2382.74	3222.35	1776.71	3188.89	2263.3	3249.44	1685.2	1726.36	1726.1
M229T54			0.439935	0.346768	0.000448536	229.036	53.612						5560.7	9073.83	6424.58	6353.48	8656.35	3838.86	1060.38	2435.41	2019.14	2895.35	2472.76	2955.7	5067.81	5473.84	5330.03
M518T423			1.49564	2.21247	0.000454887	518.068	422.855						47007.4	37436.1	61053.3	9648.21	36973.5	48175.3	98384.4	91100	80572	60978.6	101984	98624.3	59500.2	60071.4	59503.4
M857T304_1			0.164317	2.49302	0.000455414	856.726	303.744						441.455	300.05	616.516	76.4721	448.409	747.455	874.016	1316.02	1197.04	1090.94	816.177	1263.34	516.325	450.863	448.226
M591T63			4.92813	0.1181	0.000457638	591.26	63.26						1.02613e+06	676859	932165	690654	579650	217737	35005.5	57744.5	78909.1	49830.9	77461.4	187998	439801	441496	439797
M649T401			0.161651	2.31488	0.000457969	649.275	401.314						281.101	771.311	612.065	335.96	318.065	212.646	739.979	1085.83	1123.61	940.056	878.621	1091.21	775.618	781.163	857.463
M349T71			0.667268	0.192239	0.000460554	349.058	71.3225						14018.8	15141.6	3484.15	14008.2	12495.5	9209.03	1867.36	1781.53	2016.2	1886.79	2934.96	2654.09	8406.49	9282.18	8365.29
M358T192			0.378101	4.54967	0.000461275	358.241	192.243						326.775	523.229	2717.17	887.149	237.988	272.039	2859.25	5674.29	4096.45	3244.96	3057.22	3653.98	2168.77	2359.73	2358.31
M311T124			0.629665	0.312575	0.000466675	311.029	123.511						12180.4	10628.6	6927.19	18051.4	14105.9	10514.9	1834.08	4273.11	3071.07	3173.82	5242.21	5038.76	7985.45	7984.48	8249.7
M491T304			0.569348	1.30734	0.000471348	490.855	304.08						28400.9	24173.6	27819.2	18486.1	26340.7	27274.6	33642.4	33342.9	32500.6	33277.5	32467.5	34132	28481.1	29221	29229.7
M605T43			3.61152	0.223209	0.00047953	605.095	42.502						577037	406240	214162	378887	405481	236481	44016.6	94076.3	28246.5	141581	88516	98704.8	110642	113880	113868
M1101T179			1.02322	2.86761	0.000480261	1100.69	178.96						12611.5	7776.15	25112.7	1767.45	14272.7	10384.4	38589.6	34800.3	20874.7	31981.9	42407.7	37598.5	23149.4	23149.9	23069.1
M707T304			0.139527	2.02285	0.000483048	706.778	304.08						666.772	368.153	490.802	213.477	465.077	748.941	803.75	1133.32	1096.8	1065.56	819.774	1054.74	646.226	646.137	684.451
M623T175			0.401407	2.65767	0.000484704	623.302	175.38						1063.43	2246.82	4164.4	2723.87	505.059	1031.09	3759.67	5543.89	5017.29	5984.27	5454.05	5427.75	5445.55	5445.3	5370.61
M433T263			0.342457	4.0029	0.00048668	433.254	262.64						497.414	93.0081	2760.22	54.9877	1051.74	324.4	3307.69	3812.63	2657.3	3707.8	3141.65	2513.9	1876.01	1948.41	1881.21
M913T300			0.175971	2.73926	0.000487248	913.278	300.268						580.65	290.479	585.365	125.666	297.251	708.589	1475.73	1144.98	652.951	1263.98	1199.19	1352.36	630.603	605.912	599.203
M741T298			0.188691	0.280513	0.000492039	741.066	297.748						1068.14	1689.82	1000.87	764.071	783.879	1217.52	192.196	198.126	591.981	199.675	409.264	238.91	869.391	942.417	868.427
M1059T180			0.368369	3.34384	0.000493978	1058.65	180.345						805.191	977.612	1712.03	2476.06	748.079	403.471	3899.99	4882.37	2888.3	2458.78	5249.6	4437.23	1879.7	1843.93	1879.8
M806T182			0.345873	2.96587	0.000498395	805.504	182.464						2633.17	1725.74	2075.54	714.875	943.179	274.981	3227.28	5160.38	3270.73	5538.2	3875.15	3745.08	1922.4	1990.72	1921.78
M556T414			0.27563	3.23622	0.000501921	556.261	413.714						269.015	752.663	1802.69	770.496	252.54	257.572	2064.9	2591.64	1594.44	2764.3	1923.14	2346.19	1820.8	1847.62	1820.84
M124T286			0.254062	0.417038	0.000503306	124.007	286.233						2754.97	1968.53	1626.07	3382.49	2257.2	2234.38	1095.03	835.647	672.704	789.282	1255.78	1283.36	1644.38	1682.31	1680.58
M1079T299			0.205984	2.59567	0.000513199	1079.21	298.641						631.215	1147.92	762.252	85.9887	353.27	573.418	1510.59	1661.44	2002.2	1562.35	1219.38	1269.21	960.209	897.422	954.064
M217T332_2			0.302268	0.575169	0.000520478	217.107	331.964						4651.46	6203.92	4039.71	4618.32	3593.98	4600.67	2663.91	2588.24	2134.88	3106.39	2412.08	3031.32	3535.36	3559.98	3563.25
M760T150			0.742285	1.40794	0.00052118	759.564	149.927						35860.3	30866.3	37632.7	25148.4	38545.9	30969.5	39607.5	47479	49102.5	44041.7	50979.5	49002.3	36907.1	37257.6	36908.3
M203T162			0.700522	0.179887	0.000522556	203.128	161.596						10532.3	16305.6	9482.2	20167	8991.45	9190.13	836.483	971.87	351.952	4259.76	3243.78	3768.08	9264.85	9489.19	9268.05
M295T333			0.272185	0.526409	0.000524078	295.03	332.611						4506.76	2982.59	3833.54	2787.06	3732.36	3138.71	2101.27	1062.17	1567.1	2024.03	1816.44	2473.58	2840.2	2631.03	2605.03
M165T30			0.572621	0.106974	0.000524536	164.89	30.2355						12226.6	11458.3	11752.8	9764.87	3763.7	4712.93	3114.75	454.429	292.226	737.263	626.74	516.887	6626.64	6689.31	6628.07
M836T34			0.569445	0.323342	0.000526358	835.532	33.722						8420.17	7500.48	7418.54	10092.8	15625.8	13377.2	2895.52	3534.18	3788.55	2616.69	4175.12	3177.76	6788.45	7483.83	7721.55
M466T156			0.41509	2.40516	0.000537683	466.252	155.771						1804.54	1898.32	5235.09	2469.25	2221.95	1769.29	5532.39	7339.62	6275.51	6186.78	4316.68	7384.78	3923.85	3927.9	3560.07
M718T184_2			1.22761	4.41683	0.000540732	718.392	183.791						8047.03	3053.32	31389.5	437.321	8071.33	5512.75	58122.5	42702.5	25173.6	34121.4	45829.4	43650.9	26830.2	28084.3	26825.6
M665T175			0.404892	2.7066	0.000541513	665.338	174.952						1597.33	2203.92	4360.89	1414.26	782.693	1155.76	4317.44	6046.64	4270.87	5290.56	6595.8	4644.78	3070.17	3347.4	3342.63
M784T285			0.403387	10.9046	0.000541623	784.398	284.663						48.5567	763.269	1107.54	131.959	49.6374	88.5962	2636.17	6567.73	4350.46	5230.53	2965.99	2125.46	2124.11	2167.71	2123.99
M325T286			0.208846	0.437366	0.000543396	325.074	285.623						1543.53	1494.38	1128.76	1514.79	2181.07	2142.18	643.095	748.75	834.834	990.325	778.585	380.129	1628.17	1753.62	1626.23
M272T299			0.163604	0.630721	0.00054642	272.045	299.332						1432.56	1690.82	1789.13	1365.8	1721.15	1582.62	1093.84	832.026	746.25	923.908	1036.22	1411.38	1198.65	1251.73	1200.35
M977T298			0.20139	0.291071	0.00055089	976.958	298.39						1266.19	1730.37	860.302	884.493	1048.15	1488.13	409.498	264.155	91.9379	114.245	688.587	549.884	851.42	854.471	957.838
M318T250			0.251849	0.433999	0.000555831	318.059	250.373						3085.74	3296.01	1664.22	2728.51	2562.98	1792.4	1470.42	1229.84	919.842	1011.04	902.749	1032.44	1128.69	1232.08	1231.89
M349T331			0.296666	0.524659	0.000557298	349.074	330.586						3678.3	5513.27	3916.93	4945.79	3463.53	3702.01	2942.55	1446.72	2027.09	2134.58	2006.97	2673.89	4538.06	4470.93	4627.95
M758T304			0.176399	2.41529	0.00056241	757.757	304.045						553.729	494.21	750.716	56.5057	514.103	860.684	1172.59	1309.2	1411.6	1380.07	887.397	1640.42	761.176	758.529	697.426
M236T382			0.157319	2.28072	0.000569524	236.03	381.561						519.587	425.383	407.616	351.252	508.885	624.382	952.224	1421.88	938.024	1455.96	846.352	856.213	699.94	699.86	692.89
M461T38			0.580003	4.49016	0.000570816	461.245	38.259						1549.41	3223.04	3752.75	951.842	1586.38	1356.46	6827.18	9297.89	5136.47	8239.95	14415.5	11850.2	7570.56	7541.47	7967.37
M377T158			1.70562	5.54168	0.000574916	377.242	158.325						1464.71	9226.76	57834.6	7356	1771.42	2247.26	47687.2	100608	72263.7	84795.8	53466.1	83963.7	41932.9	42360.3	41938.8
M727T287_1			0.279585	0.330395	0.000575669	727.207	287.431						2343.88	2484.46	1529.38	2797.16	3196.49	1991.14	346.193	433.29	308.958	1157.11	1632.78	860.368	1606.36	1605.23	1580.72
M442T173			0.467649	3.26752	0.00057764	442.309	172.796						1268.28	1991.61	5508.01	463.708	1836.82	618.443	5215.49	6203.26	5845.28	6762.03	8486.54	5674.46	3346.47	3349.75	3576.25
M293T303_2			0.293862	0.309235	0.00057944	293.123	303.406						2333.03	3430.54	1589.55	2441.99	4014.21	2302.56	611.417	852.798	462.117	1070.79	1177.26	807.981	1927.13	2155.71	1977.66
M261T98			0.984484	0.223011	0.00058953	261.097	98.461						17371.1	26106.8	32578.4	42850.1	16392.9	31310.2	3588.56	5288.37	4073.99	12748	3083.6	8373.32	13808	12398.3	12791.7
M838T169			0.313143	0.264964	0.000591781	838.003	169.079						3252.3	3094.45	1137.73	3747.18	2401.75	3434.77	677.665	392.119	1485.5	703.83	330.994	932.344	1008	1008.33	928.229
M256T104			0.888785	0.107926	0.000592792	256.024	103.757						13964.3	23437.1	4063.31	19970.2	23775	25470	1427.03	1316.34	2349.23	2025.25	1873.2	2954.23	10494.9	9550	10505.9
M554T105			0.58373	2.94703	0.000595829	554.315	105.462						1729.2	4341.87	8554.91	3645.86	2271.5	408.87	10160.6	10426	8194.82	10051.1	9292.87	13621.5	6453.72	6452.45	6396.93
M392T487			0.202483	1.83448	0.000601747	392.07	486.536						1115.07	968.613	1654.59	403.995	1338.12	1201.99	1929.17	1886.08	2241.21	1795.57	2248.18	2158.51	1624.97	1645.01	1589.36
M404T204			0.406351	0.561269	0.000602207	404.18	203.848						6215.55	10389.7	9104.49	7371.77	7689.65	7412.29	4723.08	3936.64	2989.78	5545.43	4524.97	5324.02	6230.65	6278.74	6230.04
M719T184_1			1.16765	4.23479	0.000604044	718.895	183.657						8653.3	2500.03	30469.4	185.851	5883.14	4758.01	35711	35732.8	22338.6	38849.9	49259.3	40222.1	24892.4	25109.8	24895
M542T226			1.81713	3.33895	0.000606199	542.251	225.714						23206	25542.3	80827.5	4834.05	29122	17047.8	111029	64626.3	80995.3	104296	126511	115489	65770.9	65759.5	64674.2
M913T356			0.206062	2.28821	0.000607154	913.488	355.557						1117.37	745.417	1307.42	506.187	191.201	353.198	1690.8	1639.09	1672.72	1474.67	1705.64	1475.13	837.338	804.269	804.314
M160T243			0.609246	0.373909	0.000608594	160.061	242.513						10473.6	13501.7	8120.08	17471.7	13158.3	10141.7	3684.09	2985.09	2042.99	6295.55	6307.35	5930.58	9521.47	9519.6	9161.69
M623T33			0.737687	2.36083	0.000613843	622.54	32.983						6924.78	9086.39	13435.5	5308.85	7849.65	8780.58	24738.3	19051.7	26176.2	17185.6	21823.8	12337.3	8721.79	8911.97	8598.28
M987T139			0.356148	0.39803	0.000615904	986.594	139.101						4861.14	5321.11	4137.87	6598.32	3942.78	3230.58	2277.49	1485.61	508.347	2071.66	2318.96	2519.31	3892.55	3890.57	4148.22
M177T310			0.287889	0.489702	0.000626959	177.019	309.546						4063.89	2820.12	2594.92	2543.95	4298.41	3361.63	1535.81	1455.19	1016.31	1991.87	1746.34	1893.24	2344.86	2456.42	2349.14
M934T302			0.137249	2.42701	0.000628436	934.243	302.151						578.092	307.708	363.033	42.7423	209.073	527.66	788.636	729.345	770.866	1011.73	662.824	959.308	643.629	666.816	665.577
M960T298			0.150703	0.50411	0.000635102	959.883	298.366						1138.64	1106.85	942.671	757.757	900.74	1127.59	634.507	422.626	226.798	357.614	692.908	677.229	784.81	767.462	784.39
M313T5			0.201057	0.439177	0.000635669	312.966	5.327						1633.14	1378.44	2276.65	1346.34	1594.37	1848.26	851.172	897.703	1209.58	343.651	703.628	419.945	1547.86	1529.67	1349.76
M124T168			0.295304	0.393109	0.0006374	123.948	168.048						4461.5	3340.92	3203.05	2564.62	2557.91	3641.17	1934.79	1155.74	2089.57	895.237	200.011	1496.09	3148.86	3148.52	3194.95
M425T224			0.423641	0.194638	0.000637846	425.288	224.424						3731.98	6673.03	7136.88	5878.75	7041.67	1899.2	989.228	428.218	907.732	1288.61	847.683	1837.3	3959.67	3959.54	4018.9
M377T307			0.119807	1.22171	0.000641278	376.904	307.23						1710.17	1395.02	1601.21	1690.88	1779.58	1810.41	2080.7	1933.51	2011.47	1997.44	1952.56	2225.91	1886.91	1886.91	1915.82
M728T287			0.202358	0.306337	0.000644818	728.21	286.959						1189.19	1006.51	952.959	1513.71	1739.28	970.567	108.437	180.752	128.79	591.986	765.66	482.764	693.648	719.01	693.941
M1044T228			0.403498	4.73985	0.000649094	1043.56	228.058						1020.07	363.139	2320.07	30.5772	1273.27	791.372	5331.85	4984.65	1906.21	3332.4	6102.05	5826.92	2546.67	2568.63	2546.67
M635T360			0.46615	0.0848755	0.000653842	635.115	360.233						4226.76	7490.43	2623.6	8136.75	4274.58	3208.98	284.996	203.405	81.9403	783.907	442.511	746.204	2037	2036.95	2023.04
M875T177			0.572011	2.47047	0.000655275	874.552	177.28						3745.12	4753.21	10524.6	2627.71	3383.51	3452.55	7917.19	11863.7	12882.6	13326.7	11704.2	12681.1	9306.89	8583.03	8588.66
M289T105			0.866502	0.0977639	0.000658608	289.001	105.296						28877.2	11701.1	6731.21	15551.1	21310.4	18431.3	1111.2	3533.83	1551.85	1417.78	1676.19	739.954	9193.46	8441.33	9208.28
M1079T300			0.410664	1.58011	0.000663895	1078.72	299.995						8511.98	6362.22	8597.45	3798.56	6613.37	8285.55	11137.1	11648	9936.46	12131.6	10169.8	11608.8	8301.84	8464.23	8466.38
M231T333_1			0.266498	0.536678	0.000670282	231.049	333.076						3533.92	3273.01	3059.17	3768.78	4192.34	2619.58	2050.62	1211.99	1058.35	2282.28	1891.32	2478.79	2781.24	2720.04	2606.63
M867T419			0.276269	6.84321	0.000672237	867.457	419.352						94.0927	457.257	608.293	385.921	137.253	47.727	2155.27	3149.96	841.232	2376.42	2051.33	1268.28	1093.33	1124.3	1093.89
M139T101			0.569102	0.243444	0.000675041	139.076	101.3						5787.43	10147.5	11335.9	8299.11	7235.95	15478.2	1367.92	2864.82	1117.89	1564.08	2474	4800.19	6372.13	5213.78	6376.61
M892T74			0.49321	0.387073	0.000677713	891.529	74.265						6242.92	11932.8	6558.07	8331.86	12018.5	10585.5	4950.48	3570.58	4065.77	3004.4	4463.86	1493.12	11117.6	11118.5	10768.3
M980T184			0.878089	3.6559	0.000680123	979.57	183.878						7530.72	2247.46	16295.6	434.167	6236.2	4993.74	26674.9	25134.4	11854.1	22218.6	30612.9	21471.2	14342.9	15010.1	14995.8
M242T441			0.277116	2.33468	0.000685877	242.114	440.923						734.055	1333.48	2175.11	1354.15	730.119	797.979	2659.98	3020.08	1816.38	3572.7	2743.97	2821.24	1749.92	1815.56	1814.91
M845T302			0.181329	1.4265	0.000687042	844.751	301.56						1953.19	1931.34	2151.28	1240.55	2012.4	2139.14	2709.4	2784.19	2354.69	3071	2610.72	2771.95	2225.21	2337.51	2228.63
M384T419			0.112605	1.65616	0.000687329	384.01	418.918						436.752	292.967	541.691	630.566	375.575	493.906	728.794	653.895	744.455	777.612	940.524	744.695	696.75	664.484	665.255
M842T302			0.203309	1.58004	0.000687846	841.756	301.852						2195.2	1262.45	2003.65	1234.48	1947.56	1772.98	2940.28	2761.36	2928.27	2948.52	2125.28	2754.47	2160.61	2162.99	2206.27
M519T126_1			0.651079	0.273043	0.000689291	519.115	125.501						11166	16712.9	8535.28	16888.4	10330.1	8728.56	853.268	548.075	2841.45	4970.79	4239.98	6304.17	8705.6	8922.98	8918.7
M439T234			0.358183	0.268984	0.000694406	439.268	234.233						4178.43	4945.12	5335.1	4602.73	4531.93	1488.59	882.034	743.721	644.395	1917.35	429.724	2129.4	4151.16	4283.1	4155.19
M959T187			0.862608	2.39636	0.000695363	958.595	186.694						9931.81	8627.33	21381	660.565	15713.9	15422	36297	24427.1	26766.8	24790.4	28442.5	31183.1	21986.7	22149.1	21986.9
M375T161			0.442952	5.64891	0.000695978	375.227	160.689						168.307	531.316	3269.76	671.343	518.833	361.744	2496.07	4311.5	5008.79	6416.66	5078.6	7877.68	3102.19	3102.43	3151.14
M151T203			0.755959	0.453054	0.000698687	151.061	203.071						20203	24039.4	23288.8	20219.5	35198.6	19951.2	11403.6	9013.4	6883.87	11434.2	16085.1	9921.57	17277.5	17469.4	17277.1
M405T289			0.423814	3.11455	0.000706829	405.239	289.272						423.144	2205.62	4460.21	1878.75	1022.56	807.724	5871.43	4024.67	6083.28	5397.47	4607.71	7646.33	3664.55	3661.28	3522.87
M653T361			0.150837	0.55183	0.000714245	653.154	360.55						962.2	978.066	816.29	1386.92	1196.9	1070.25	472.828	553.109	493.774	557.84	603.684	856.341	850.869	843.669	850.821
M407T178			0.568821	2.37706	0.000716439	407.252	178.303						2725.85	4824.15	10796.5	2439.4	3189.46	4729.68	11752.5	11513.5	12530.6	10080.6	12707.7	9648.88	9425.85	8706.42	9420.92
M490T176			0.412254	1.81644	0.000717059	490.327	175.904						5211.9	3937.99	6112.99	2420.87	4169.6	4957.4	9237.22	9866.44	8240.7	6022	7441.33	7892.4	6088.56	5984.37	6080.46
M434T169			0.326594	0.260762	0.000718428	434.488	168.51						3042.13	4006.53	1687.81	4227.32	2272.56	3039.93	221.717	92.617	1132.38	1200.79	1601.25	516.997	2042.17	1985.24	2042.05
M253T169			0.332761	0.301935	0.000718459	252.972	168.916						4199.02	4133.9	1570.98	3948.14	2791.01	3917.36	578.082	455.579	1957.98	1637.07	566.64	1012.56	1783.68	1782.47	1669.21
M247T27			1.44416	2.39942	0.000722647	246.991	27.134						23334.2	54066.7	59397	13310.2	25385.6	25292.5	61126	62654.4	96364.8	82316.8	89116.5	90192.1	54993.4	55585.6	54988.9
M606T43			2.08254	0.213442	0.000726725	606.098	43.433						148957	162293	49062.4	136835	124602	77804.5	11027.1	19859.2	9509.84	50684.9	20938.7	37294.2	42157.3	42166.2	41261.4
M1075T228			0.180012	2.0997	0.000728759	1075.46	227.617						578.661	499.616	770.342	631.517	974.221	772.564	1914.21	1278.9	936.376	1349.32	1724.31	1672.14	1114.31	1114.48	1179.53
M543T169			0.349752	0.253104	0.000729241	543.49	168.702						3602.12	3971.5	1338.42	4979.05	3474.26	3661.45	341.253	1626.9	1578.8	844.139	201.414	729.45	1879.31	1769.86	1789.06
M867T135			0.630224	0.46287	0.000733053	866.588	134.62						15731	23897.2	16333.9	14076.8	18247.1	15265.4	4293.22	8504.27	12491.5	4660.8	10148.7	7832.42	11923.4	11958.6	7796.13
M981T300			0.504338	1.53085	0.000733165	980.741	300.224						13676.3	10857.4	13509.7	6563.2	10697.7	13813.7	18436.2	18978.3	15925.3	17678.5	16012	18779.2	13913.7	14098.8	13915
M318T30			0.400716	2.68836	0.000737642	317.988	29.5935						1580.61	4233.61	1347.59	775.962	2668.38	1752.09	7543.77	6227.37	6056.67	4616.64	4402.6	4376.38	1872.56	2196.74	1909.98
M576T148_1			1.01763	3.4411	0.000739415	576.196	148.156						1881.3	20875.7	19447.5	4861.66	2988.36	2072.04	23046.9	37688	37016.6	26514.2	29407.1	25699.7	18839.6	19073.1	19072.4
M724T380			0.197635	2.23689	0.00074283	724.372	380.108						265.84	1075.58	1160.09	567.2	475.788	444.74	1377.34	1425.37	1760.82	1727.11	1398.5	1234.35	1245.93	1193.17	1196.21
M668T356			0.273821	3.62804	0.000746743	668.335	356.438						216.568	1167.04	1298.71	440.666	221.479	151.47	1646.03	2405.51	1320.18	1941.12	2948.2	2422.35	1404.4	1360.51	1358.2
M143T168			0.440969	0.609774	0.000747007	142.972	168.235						13925.1	11174.4	10431.6	8647.3	10238.7	12305	5635.54	6285.17	8166.91	6406.65	5632.8	8558.32	9815.85	9815.84	9571.57
M443T173			0.315035	0.308536	0.000748739	443.065	173.162						3858.06	2754.47	1625.2	3822.29	2495.23	4098.27	1677.94	1079.81	1178.46	117.887	925.703	775.483	6660.38	6802.11	6661.2
M809T182			0.655429	0.415552	0.000750533	808.511	182.265						12712.1	20137.6	14990.2	12898.4	22022.6	21105.3	6742.75	3251.97	11756.3	7181.32	5181.1	9048.38	9956.72	13370.1	13385.1
M469T97			1.55713	0.236143	0.000751078	469.169	96.662						73032.8	55524	36703	80964	101400	50829.1	8083.4	5611.99	3480.45	28725.8	28671.4	19518.8	37476	44571.7	44481.8
M687T301			0.876121	1.4634	0.0007518	686.81	301.136						46251.5	35927.3	47624.3	24454.2	39427.8	48279.1	60978.4	59977	55908.5	60437.9	55340.2	61449.6	46350	46927.1	46949.6
M1075T298			0.179678	0.303066	0.000753572	1074.94	298.304						1059.1	1537.56	865.8	635.368	730.719	1154.23	247.676	293.563	206.502	157.999	546.839	360.598	883.31	913.139	944.404
M519T296			0.248756	0.308895	0.000760449	519.086	296.472						910.487	2535.16	2076.38	2235.08	2258.3	1708.69	416.16	368.789	133.483	577.154	1069.56	1056.37	1514.84	1416.43	1440.06
M915T190			0.787898	3.71606	0.000761189	914.547	189.744						2081.88	3953.79	15932.3	1653.59	1715.32	2437.85	14204.2	14755.2	14042.2	18906.2	20317.8	20986.7	11634.6	11114.4	11633.7
M537T388			0.398657	0.466394	0.000764577	537.165	387.936						9774.65	6831.6	7159.11	4866.24	8006.62	5285.18	3992.17	3931.05	3581.93	2539.06	2749.71	2758.88	5993.49	6091.44	5992.85
M978T184			0.85154	4.14052	0.000772348	978.056	183.684						1637.86	137.285	12321.4	12462.9	1607.43	1548.75	27146.6	21712.6	11174.8	17812.1	24092.9	21099	12515.8	12118.1	11985.4
M227T68			1.59273	1.96928	0.000772913	227.201	68.39						54399	48357.1	80474.8	44690.7	52325.6	53776.2	80070.1	120843	84795.3	104498	144873	122707	79947.6	79940.3	79442.7
M771T133_1			0.398038	2.0994	0.000778193	770.512	133.384						4098.13	4043.07	5230.04	1205.91	2981.81	3442.98	5262.85	6694.59	9289.17	6561.75	8335.69	7947.44	5277.4	5142.63	5277.17
M239T197			0.228159	0.520989	0.000780805	239.03	197.44						2261.87	2854.65	1840.37	2516.39	2793.57	3079.81	1623	689.599	1778.14	1565.31	875.896	1463.5	1531.28	1604.41	1605.23
M543T99_1			0.807994	0.180799	0.000783717	543.169	99.105						25238.2	13825.3	9561.9	13230.8	26367.1	13501.7	430.294	3173.27	3542.37	3734.28	3132.91	4378.65	17235.4	15972.2	17231.2
M720T183_1			0.658418	4.09273	0.000786316	719.902	183.137						3043.1	1118.42	9349.2	141.665	2730.21	1536.09	13575.9	12431	6303.6	10786.1	16475.5	13764.1	10081.4	10456.9	10098.8
M430T233			0.538616	5.46966	0.000786547	429.987	232.524						530.789	708.266	5374.59	24.7646	417.878	951.578	9475.18	10878.3	5242	5238.27	6531.49	6435.05	4339.65	4618.15	4367.4
M723T32_2			0.608044	1.92887	0.000787983	722.578	31.738						5874.17	10043.1	11756.6	8640.62	5255.17	6534.68	15281.6	20531	16547.4	12238.3	14015.7	14173.3	9534.04	9534.29	9764.71
M145T168			0.281853	0.582847	0.000791829	144.969	168.183						5447.15	4319.19	3846.01	3757.32	3589.52	5092.92	2572.18	2551.03	3168.42	2480.52	1566.45	2845.78	3931.8	3929.63	4060.76
M253T333_1			0.216611	0.469807	0.000792805	253.029	332.589						2520.59	1539.47	1588.73	2037.9	2655.84	1638.25	1185.34	664.018	873.136	944.108	718.219	1243.84	1421.35	1502.06	1499.74
M247T296			0.306611	0.304138	0.000804149	247.021	295.721						2951.15	2436.71	1676.32	4573	3467.35	2333.19	943.392	718.369	552.353	1290.31	1002.61	796.428	2341.96	2332.88	1793.78
M177T384			1.61821	0.460102	0.000805195	177.04	384.154						118078	93159.6	69534.4	108685	122672	83177.6	33694.9	27361.3	26385.3	62802.8	64305.2	59352.4	70215.3	70911.3	70212.5
M686T176			0.499619	1.4624	0.000807505	685.527	175.888						10705.1	14631.2	15285.7	11582.4	10072.8	9212.42	15566.5	17468	19147.1	18895.3	17052.2	16417.3	13451.1	13610.2	13608.2
M659T260			0.752752	3.6436	0.000808049	659.259	260.432						6474.22	3574.65	7637.36	2295.4	3299.57	4864.34	19466.9	28136.1	12046.8	16217.2	14704.9	11979	9308.84	9440.03	9361.28
M203T413			0.603168	0.255537	0.000815105	203.02	413.485						13638.9	13368.2	7267.88	16729.6	9348.99	5786.53	2495.27	2954.47	2219.81	3681.67	3078.49	2471.55	6996.31	7025.93	7812.93
M758T425			0.127308	2.10329	0.000817042	757.967	425.476						329.77	461.424	343.249	103.73	404.505	376.249	889.367	700.84	678.73	489.181	631.777	856.503	526.919	547.015	527.078
M1100T179			1.4539	2.95135	0.000818123	1099.69	178.96						23889.8	12789.6	55964.6	2327.07	24481	18232.9	75684.6	65411.5	44546.1	60221.6	86642.5	73850.2	43669.4	43851.9	43757
M508T250			0.182028	0.624115	0.000820737	508.155	250.216						1735.36	2034.84	1862.47	2572.07	2128.93	2505.21	1280.53	1707.68	1364.28	1346.52	939.937	1373.98	1710.22	1889.48	1702.83
M225T47			1.29955	2.39478	0.000831491	225.185	47.341						22476.3	15769.7	50987.8	8499.11	27574.4	31671.4	62687.9	76928.4	40751	61832.7	66350	67380.1	48072.6	48090	41704.3
M185T55_1			0.390027	0.46632	0.000837061	185.012	55.2385						7493.65	7454.44	6764.4	4930.55	8585.05	5094.6	963.113	3387.9	4465.57	3401.34	3685.68	2899.68	7695.57	7698.2	7634.51
M517T230			0.354981	2.45498	0.000839398	516.626	229.659						2345.94	966.554	3585.06	330.305	2520.93	1918.61	5693.93	4371.15	3280.93	4858.85	4732.05	5706.34	3757.86	3856.21	3761.74
M698T144			0.371707	0.634951	0.000841522	698.474	143.646						8060.15	10147.8	7592.69	11363	7476.32	8900.62	5371.2	5437.76	6852.78	4898.15	5396.18	6039.54	8048.15	7956.25	7950.95
M240T367			0.163349	0.555877	0.000843703	240.05	367.382						1595.67	1659.8	1398.23	1609.67	1173.34	1225.55	923.759	936.927	844.185	1117.92	588.311	404.052	1036.09	969.969	970.397
M1072T182			1.71295	3.47139	0.000846056	1071.66	181.977						29720.6	12462.9	53638.5	3383.09	33788.2	23278.1	89317.7	90958.3	44982	76937.7	126469	113813	59563.6	60811.3	60814.1
M591T36			2.13372	0.1358	0.000848742	591.259	36.256						172892	141921	186276	168750	77444.8	42989.8	7521.44	13071.6	15495.9	12758.7	18014.8	40456.9	80916.9	81681.3	80917.3
M325T440			0.215302	0.399963	0.000850776	325.016	440.155						1887.8	1285.3	882.615	1803.9	1900.52	1565.85	415.203	364.645	459.787	1078.49	634.886	777.042	1101.27	1111.2	1111.61
M661T185			0.82128	0.271521	0.000851931	661.213	184.725						18895	17874.8	15159.5	9607.62	25528.7	24644.9	3915.94	2304.42	1824.11	7360.28	3184.87	11742.2	17819.1	18311.4	17565.2
M562T36			1.32489	1.71557	0.000863263	562.489	36.35						51027.5	48820.7	65400.1	65012	40043.5	51010.7	81652.4	112576	62650.1	100320	98994.6	95042.9	78043.4	78878.4	78878.8
M430T299			0.288175	0.460118	0.000871802	430.049	298.712						3090.33	4880.1	2616.1	3643.76	2750.95	2931.67	1818.91	1625.09	811.231	1273.53	1780.85	1852.68	2654.17	2653.27	2578.93
M284T43			4.36186	1.77844	0.000873364	284.266	42.811						665360	487920	693285	341957	561000	575900	861991	1.32722e+06	907357	960604	1.04785e+06	809033	581258	545931	581332
M564T179			0.65972	2.16272	0.000879346	564.328	178.757						9431.81	6150.36	15201.2	1999.01	8411.3	7622.4	19588.4	15053.9	14855.9	17792.9	20978.1	17306.2	15335.9	12095.4	15585.6
M645T303			0.31079	1.32178	0.000886041	644.799	303.455						7989.33	7500.26	7970.41	5076.23	7197.78	8147.86	10288.3	9597.51	9254.95	9781.48	9099.97	9979.93	7970.53	8107.05	8110.21
M594T65_2			0.85456	0.129857	0.0008886	594.268	64.766						19005.5	29279.7	21943.4	26331.6	11276.1	7591.4	1159.22	527.596	2836.8	725.852	2786.6	6953.02	13967.1	12738.3	12751.3
M437T57			0.241515	0.551073	0.00090328	437.181	57.246						3115.33	2620.92	3346.74	3418.57	3032.36	2452.76	982.662	2705.69	1208.64	1670.73	1662.22	1682.03	4433.4	4780.88	4783.84
M504T428			0.153565	1.83539	0.000908091	504.051	427.584						725.624	597.751	885.237	252.487	616.967	543.755	1174.11	1296.75	1231.23	849.547	1013.75	1082.07	834.985	851.944	834.931
M697T292			0.2179	3.57372	0.000914121	697.387	291.977						47.5136	838.316	434.288	792.175	183.987	25.0076	1535.63	1366.25	894.482	1751.26	1775.62	972.383	1058.45	1078.53	1058.51
M932T287			0.580057	4.38445	0.000917944	932.492	287.348						191.191	6425.05	4835.46	792.429	60.4873	110.948	7920.25	12840.6	7494.79	11331.9	7267.69	7580.1	5943.67	6032.09	6031.98
M1149T123			1.03576	4.22562	0.000925723	1149.37	123.037						70.6133	22524.7	17463	212.619	481.016	135.607	21573.6	34326.6	31467	26558.8	34135.1	24714.1	18296.1	18667.4	18285.6
M1137T232			0.417321	2.9359	0.000925766	1136.53	232.071						1539.15	563.127	3521.93	3824.03	885.427	1332.84	6369.07	5092.89	3577.37	5168.49	7756.27	6287.59	3658.26	3747.48	3747.91
M659T392			0.312878	2.11264	0.000926305	659.32	392.342						1527.76	2530.75	2662.29	2016.83	1326.4	1354.41	4073.63	4350.75	3249.86	5441.11	4291.37	2716.38	3005.27	2557.3	3012.47
M195T441			0.319555	0.491354	0.000931334	194.99	440.789						4767.69	3595.17	2621.64	4353.08	4471.28	4069.31	1438.64	1343.8	1156.53	2920.01	2277.92	2595.74	3055.29	3085.87	3085.81
M71T169			0.201103	0.507331	0.000934687	70.9459	169.468						1716.67	2316.6	1653.35	1710.44	1912.24	2300.33	1065.54	437.559	1347.42	632.63	923.081	1483.69	1436.62	1353.29	1352.39
M585T236			0.364638	2.27153	0.000939569	585.303	236.151						2744.64	2361.2	4215.51	664.124	1857.63	1826.08	5346.71	5840.83	3497.88	6222.81	5510.31	4631.45	3736.63	3234.25	3209.44
M1045T229			0.280211	3.49701	0.000940464	1044.56	228.557						596.868	77.0593	878.898	1604.14	671.448	311.897	2619.28	2288.84	1116.96	2247.87	3251.99	2953.76	1508.46	1364.12	1365.94
M727T305_1			0.198195	1.28246	0.000944143	726.745	304.665						3614.29	3113.13	3329.04	2591.48	3146.52	3671.89	4425.54	4262.4	4359.67	3673.65	3984.09	4259.42	3408.35	3545.46	3547.52
M539T401			0.192926	0.347331	0.000944616	539.062	400.958						1091.01	1163.28	767.298	1636.83	1408.23	977.354	263.892	82.8663	198.188	609.65	743.786	548.214	756.79	756.282	740.897
M917T175			0.806121	4.8566	0.000944966	916.602	175.435						431.765	2609.4	14908.3	1709.9	227.588	706.048	11766.6	17983.8	13091.2	18605	15553.3	23012.3	11094	11199.3	11093.8
M1135T301			0.202559	1.77412	0.000946489	1134.68	300.909						1821.61	1015.79	1513.13	455.228	1185.79	1753.33	2323.79	2423.26	2155	2430.18	2194.37	2213.79	1650.27	1815.13	1816.02
M349T424_1			0.193708	1.81476	0.000949024	349.018	424.335						581.556	970.455	1622.4	767.907	1167.37	1044.12	1872.48	1628.96	1890.36	1501.93	2107.82	2166.14	1512.36	1507.25	1507.25
M912T155			1.86019	8.75871	0.000960472	911.539	154.523						1542.3	11012.9	41521.2	1161.9	1825.43	2231.63	42107.4	145301	50022.5	89086.1	101613	91220.4	33370.6	33384.7	31923.2
M435T436			0.185278	2.30058	0.000963316	435.164	436.401						267.817	814.565	979.002	577.851	228.176	189.712	1039.19	1361.06	1164.26	1087.3	1179.7	1201.65	1032.24	1077.99	1077.62
M822T176			0.448356	5.13426	0.000963718	821.562	175.904						162.798	690.682	4793.88	226.82	77.3899	164.824	3481.87	6363.54	6685.69	5295.27	4127.67	5449.12	2434.83	2460.27	3328.04
M402T451			0.254947	2.41724	0.000966614	402.197	450.885						446.55	1474.58	1438.02	1230.38	461.794	487.691	2518.95	2887.56	1627.74	2256.93	2348.41	1749.51	1393.14	1413.13	1329.86
M610T70_1			0.955579	2.82512	0.000972992	610.158	70.117						19940.3	7123.1	18798.3	5927.56	10343.1	10889	24360	31552.4	46839.7	26992	47649.4	28900.8	24614.6	25527.3	24620.7
M760T156			0.468009	8.68741	0.000974342	759.526	156.108						82.6288	125.157	2832.94	116.778	297.709	333.958	2500.62	7644.04	3311.25	6871.75	4568.73	8021.76	2484.66	2583.41	2484.16
M361T449			0.314547	2.8317	0.000976973	361.171	448.562						461.165	1877.72	2050.39	1219.32	391.479	434.755	3283.52	3835.41	3821.29	2239.47	2282.5	2759.29	1875.97	1963.28	1879.44
M85T440_2			2.71494	0.409052	0.000981805	85.03	440.227						326797	225585	139252	276575	265249	262358	74833.1	63232.8	49009.8	167324	118877	138590	176095	177985	176074
M737T480			0.207785	0.346678	0.000991436	737.234	480.318						1396.02	1352.46	910.775	1535.91	2214.42	1102.75	341.939	379.893	238.945	627.431	788.994	573.84	884.935	885.127	848.034
M195T389			0.964242	0.484114	0.000993966	195.05	388.911						48067.5	28158.6	35980	23920.8	46902.8	40571.3	20283.4	19372.6	13516.2	16443.8	17092.6	21539.6	26966.2	27720.5	26965.2
M514T386			0.281746	3.04857	0.00100015	514.297	386.051						228.702	1643.32	1309.4	1045.73	371.13	253.547	2441.02	2919.88	2322.33	3391.43	2212.55	1503.94	1726.89	1973.25	1996.32
M777T241			0.330103	2.61286	0.00100131	777.293	240.921						2254.87	1549.44	1697.91	931.067	1020.28	2118.04	4870.89	4754.44	2400.03	2729.49	4931.03	5323.37	2190.96	2408.38	2176.13
M1121T302			0.219011	1.49687	0.00100298	1120.65	301.538						2621.89	2031.95	3025.3	1614.56	1931.99	3112.69	3570.25	3797.62	3484.59	3672.47	3509.53	3428.2	2865.58	2908.71	2865.63
M256T440			0.135158	0.539588	0.00101639	256.001	440.189						953.194	834.007	546.102	994.102	838.431	730.855	334.462	373.948	317.992	608.258	548.242	459.294	580.675	580.201	558.848
M387T388_1			0.13482	0.611293	0.00101649	387.112	388.169						1192.03	1339.42	1354.59	1394.74	1123.09	888.721	862.869	863.445	904.281	744.214	563.862	519.245	848.633	881.151	848.971
M832T188			1.78746	0.663343	0.00101933	831.502	187.909						231246	182931	149146	209864	218844	238169	138956	118147	151536	122301	128814	156291	156905	158579	156933
M387T169			0.510761	0.190597	0.00101997	387.176	169.112						9716.12	10505.8	4070.29	7950.21	4398.23	5565.52	96.3852	455.305	204.424	2424.79	3247.59	1615.87	4943.15	4323.67	4308.02
M247T244			0.385606	0.239832	0.00102003	247.154	243.727						3120.53	4850.45	6524.01	5873.05	4418.64	2002.93	498.845	598.302	373.745	1732.03	1942.4	1279.7	3000.59	3160.36	3159.39
M527T241			0.765404	3.28626	0.00102255	527.318	240.921						4638.09	6614.88	9033.16	5313.74	4274.76	4308.97	19003.3	22824.6	17318	13306.2	10585.8	29298.3	17805.4	17785.1	14854.6
M380T241			0.45812	2.67199	0.0010231	380.228	240.505						1343.34	4654.69	4120.05	3880.2	947.945	781.333	7296.27	6812.42	6368.55	9853.68	6324.2	5368.76	3288.09	3551.04	3551.8
M367T155			2.20439	5.07648	0.00102921	367.258	155.174						4429.25	18736.7	109151	5322.01	5251.98	4960.21	81922.5	157513	110812	128360	101205	170751	74278.1	74286.9	77842.8
M541T169_2			0.283157	0.320647	0.00102922	541.493	168.961						2551.58	2702.67	1277.27	3717.77	2366.63	2829.18	1291.01	184.421	950.17	1186.76	1149.42	190.65	830.149	858.195	858.107
M147T180			0.674874	0.114094	0.00104713	147.065	179.706						12549.3	17207.9	4856.25	16075.9	9226.64	6218.09	270.176	447.006	218.354	3209.47	2138.2	1262.29	6591.65	6915.24	6916.48
M576T117			2.2987	4.29785	0.00104886	576.197	117.4						5114.87	86318.9	94815.2	13333.1	4479.88	4626.38	69919.5	180574	178796	138845	185312	143466	78930.1	80373.4	80389
M300T109			1.04178	0.374766	0.00105051	300.053	108.788						50762.3	42506.6	21844.4	48015	31110.3	33735.5	11154.1	16610.2	12976.8	12149.7	25669.2	6876.96	22561	27344.6	27328.5
M414T333_2			0.4162	4.61631	0.00105158	414.27	332.609						123.499	1909.87	2208.03	1641.8	254.773	223.699	3115.95	4530.02	4836.58	7359.81	6666.48	2858.58	3282.56	2815.87	2830.11
M782T60			0.503397	2.21351	0.00105227	782.221	59.814						4672.4	5645.37	6542.41	600.029	6365.77	3818.88	12499.4	12006	8907.47	11010.1	9641.72	7127.35	7791.74	9161.1	7814.02
M547T47			0.763147	0.192493	0.0010566	547.11	46.721						19358.6	20299.3	6652.47	22220.5	8047.63	16092.1	3136.6	3096.56	2045.63	3487.32	1179.3	4892.98	10139.5	9793.15	10144.4
M209T430			0.737902	0.472709	0.00105703	209.03	429.561						22484.1	19382.7	17397.3	13924.3	24061.6	25998.6	7957.71	5282.6	6167.04	14107.4	12026.8	12719.1	14265.2	14758.8	14767.6
M795T435_1			0.193699	6.93517	0.00106384	794.869	435.029						37.7806	56.0486	463.231	26.1704	138.195	108.56	760.223	922.721	417.105	780.784	1532.34	1342.92	635.217	606.738	607.062
M289T435			0.217822	2.28772	0.00106517	289.151	434.932						698.914	1025.01	1292.84	647.784	615.157	657.936	1836.22	1846.75	1180.35	2695.38	2086.18	1651.08	1349.07	1467.37	1353.3
M872T184			0.261967	2.30879	0.00106655	871.566	183.684						1300.76	531.238	1989.95	1500.89	1140.15	596.357	3176.64	2521.98	1907.73	3482.83	3046.96	2162.43	1795.2	1953.5	1958.84
M889T189			0.639446	2.57246	0.00107004	888.547	188.812						3155.35	6869.76	11957.5	2853.4	3019.8	3040.68	11516	16208.5	12433.3	9915.43	14689.2	14717.8	9580.71	9569.25	9143.53
M1020T180			0.750386	2.38883	0.00107111	1019.61	180.072						10852.5	6411.35	17907.6	115.171	8853.54	6685.16	18912.3	22404.5	18507.4	17528.8	23751.9	20308.3	15088.4	15205.7	15381.1
M708T304			0.180165	2.29259	0.00107852	707.775	304.09						653.329	239.036	1101.64	109.023	747.453	668.161	1237.53	1237.81	1690.17	1393.25	1142.23	1365.81	640.462	640.687	614.604
M926T297			0.198089	0.640173	0.00108176	925.918	296.942						2687.75	3012.97	1982.61	2655.92	2315.87	2286.41	2084.57	1811.14	1198.85	1366.73	1517.62	1586.27	2386.41	2386.14	2426.74
M784T299_2			0.277316	0.550687	0.00108469	784.002	298.712						3644.73	5225.24	3107.56	3836.87	3016.12	3417.73	2194.9	2275.61	1416.04	1668.3	2409.4	2287.58	3074.75	3073.54	2995.05
M282T205			0.287807	0.267986	0.00108616	282.141	205.069						3646.07	3474.64	1490.05	2699.44	2185.13	1617.75	382.796	274.924	330.81	1172.02	1009.04	880.498	1571.21	1605.28	1571.52
M1076T180_1			0.738683	3.25103	0.00108964	1075.69	180.05						6969.83	1696.96	12478.5	265.686	6738.13	4149.24	18160.8	11408.2	12256.7	17954.5	23340.9	21881.9	12478.6	12789.3	12595.2
M1188T235			1.93159	11.6132	0.00109608	1187.55	234.571						8535.93	3911.31	25301.9	593.159	5297.69	4237.95	85437.4	147106	29238.3	62879.7	139346	92010.4	31362.5	30634.1	31355.5
M687T319			0.257363	2.31247	0.00109632	687.3	318.675						919.257	2305.88	1073.24	769.441	991.147	883.86	3367.26	2832.79	1647.19	2737.09	2444.83	3025.88	1381.8	1448.9	1379.76
M706T143			0.195166	0.561746	0.00110481	706.442	143.23						2178.57	1584.35	1284.71	1993.39	1794.16	2202.72	761.14	1169.88	1026.76	708.55	1250.67	1283.51	988.924	987.759	1043.09
M126T168			0.26744	0.533444	0.00110732	125.945	167.969						4604.69	3655.68	3631.05	3167.41	2948.98	3943.65	1677.95	1660.33	2723.86	2271.57	805.494	2570.66	2866.42	2630.95	2650.95
M1103T178			0.584537	2.47276	0.00110884	1102.71	178.35						5810.58	3024.55	10330.2	390.986	5564.9	4206.19	12003.1	12704.9	9239.31	10384.8	14979	13208.5	8666.02	8966.67	8962.32
M374T436			0.225011	1.78185	0.0011165	374.203	436.138						942.442	1722.36	1397.37	1924.78	959.632	901.138	2099.24	2673.72	2279.85	2200.08	2792.46	1938.13	1701.81	1543.71	1698.96
M787T256			0.264389	3.03882	0.00111696	787.434	256.268						292.949	1464.04	1413.99	638.749	130.566	134.845	2037.8	2819.77	2176.15	1992.03	1552.99	1804.89	1229.73	1271.24	1230.44
M206T313			0.135622	0.539593	0.00112124	206.082	312.663						783.777	1171.1	918.92	726.065	707.927	818.534	366.685	404.307	408.835	348.934	585.554	651.813	800.001	790.547	799.934
M581T312			0.210793	0.515783	0.0011245	581.185	311.667						1583.77	1999.59	1384.64	2544.82	2058.62	1765.55	782.201	1056.61	487.381	1175.72	1185.12	1160.4	1390.27	1407.05	1390.24
M331T56			0.602113	0.259673	0.00112642	331.117	55.5535						10530.6	10353.1	6126.12	18764.7	11513.2	8108.41	2423.53	2411.63	4235.88	2907.51	2865.78	2137.25	7868.85	8177.79	7867.44
M703T366			0.236169	0.44669	0.00112842	703.111	366.327						2210.6	1887.17	1359.84	3177.52	2271.62	1921.43	955.379	753.996	665.397	1281.44	1070.56	1003.45	1556.97	1579.8	1557.3
M980T469_1			0.205801	4.23419	0.00114136	979.506	469.475						172.253	279.438	748.155	81.8268	242.523	221.977	1245.34	1460.04	434.671	1018.8	1556.48	1678.29	793.894	781.418	793.73
M295T342_2			0.638511	0.298737	0.00115639	295.102	341.629						10851	15454.4	8241.25	18978.1	15050.8	7773.96	3928.54	2523.65	1429.95	7114.78	3911.4	3900.13	7568.78	7788.21	7572.05
M338T211			0.116295	0.632001	0.00115722	338.072	210.908						796.914	845.212	816.904	927.132	1040.25	1034	806.205	367.734	506.25	564.593	550.018	656.185	795.6	757.164	757.454
M998T181			1.65836	2.26212	0.00115956	997.621	181.254						61481.8	25680.5	87956	5549.87	55960	46045.1	117828	111298	82830.2	95261.1	123042	109182	88838	91131.1	88883.7
M343T337			0.2955	2.588	0.00115989	343.233	337.072						677.953	1698.23	1415.88	1767	904.738	650.138	3038.24	4084.02	1968.3	3964.16	3246.86	2109.26	1926.14	1985.52	1977.09
M547T305			0.269094	1.29612	0.00116846	546.822	304.766						6495.15	6264.32	6489.84	4343.49	6774	6506.94	7599.72	8188.2	8354.3	7780.48	7415.88	8454.07	6929.93	6929.74	6850.62
M681T101			1.12725	3.67472	0.00117267	681.211	100.712						7448.78	18562	17426.9	10853.8	8155.84	6205.73	14861.3	57024.7	53914	36237.2	52191.3	38052.2	35942.3	41503.3	41448.3
M345T369			0.572053	3.07419	0.00117999	345.213	369.199						830.506	6235.65	3465.81	6922.89	1064.21	910.141	10674.1	13259.3	7134.73	11674.4	9559.4	7427.2	7414.44	7267.23	7264.61
M589T302_1			0.820875	1.39363	0.001188	588.832	302.134						48386.1	37742.2	47742.9	27139.9	43087	48730.2	60176.2	60104.7	56057.8	59511.3	53729.3	62771.1	48426.8	48980.4	48429.5
M979T469			0.202551	4.25876	0.00118916	979.004	469.332						150.537	241.269	696.169	135.892	217.261	207.298	1027.22	1222.71	525.762	937.435	1553.91	1753.21	792.124	761.043	760.994
M151T441			0.206659	0.552513	0.00119062	151.001	440.789						2230.59	1884.78	1297.23	2058.43	2133.43	1968.53	923.226	699.547	771.92	1582.64	1119.28	1297.61	1591.22	1628.45	1592.18
M466T57			0.396753	2.25187	0.00119674	466.067	57.365						2733.37	2975.46	5205.93	358.015	1764.71	2882.25	5535.4	6391.31	5645.22	4892.97	7450.84	5933.45	5965.83	5965.75	6003.83
M746T173			0.284076	1.65303	0.00119839	745.548	172.712						2435.4	2083.59	4064.08	2225.75	3901.47	3045.49	3925.03	5540.36	4994.75	5471.76	4978.62	4440.38	3852.49	3914.67	3852.47
M664T299			0.197037	0.529268	0.00119957	663.956	298.87						1788.6	2594.27	1538.22	1476.25	1506.14	2017.34	1081.29	887.817	793.333	898.975	1278.63	839.991	1619.43	1619.18	1681.11
M558T228			0.225191	1.61677	0.00119972	558.221	227.829						1960.19	2157.49	2214.66	1703.43	1681.92	2127.61	4120.68	3428.55	2212.62	3012.31	3040.95	3336.02	2729.8	2798.69	2730.14
M585T60			0.50591	0.415768	0.00122169	585.195	59.828						7905.63	13796.7	8306.84	13228.6	9857.86	8921.45	6646.17	5117.82	4725.88	5900.97	1734.34	1659.53	9404.07	9009.29	8998.25
M1104T177			0.393801	2.50921	0.00122279	1103.71	177.358						1983.8	1615.97	4890.34	136.364	2602.57	1885.51	5901.79	5090.71	4004.48	5784.79	6775.16	5350.27	3053.31	3050.4	3346.47
M573T452			0.210802	2.63327	0.00122386	573.275	451.938						293.593	1153.38	799.957	702.336	311.194	257.982	2133.57	1458.6	1007.92	1594.27	1748.87	1321.78	1452.36	1319.38	1326.67
M891T63			1.16101	5.66353	0.00122756	891.403	63.0985						1830.92	5822.9	22392.2	950.853	3336.74	2514.87	28182.6	55041.4	25608.8	18748.2	35663.8	45447.6	14274	14621.1	14068.9
M440T170			0.545556	3.80071	0.00123687	440.245	169.55						2552.21	1047.14	4548.2	3837.61	751.922	1453.04	7277.1	14829.3	5783.88	7926.57	7339.92	10775.8	4466.9	4900.08	4898.64
M1119T301			0.224453	1.53778	0.00123813	1118.65	301.357						2598.6	2341.83	2640.42	1348.28	2330.43	3339.69	3713.45	4090.29	3512.8	4021.93	3251.37	3860.54	2708.22	2893.53	2895.54
M828T305			0.144436	1.84503	0.00124014	827.717	304.759						901.519	527.628	513.993	302.248	643.027	594.151	1294.31	1105.97	890.854	835.401	1045.22	1253.69	882.966	903.12	882.347
M381T334			0.359459	2.94771	0.00124243	381.187	334.108						876.84	2644.99	2396.39	944.914	1061.5	539.852	3019.61	5518.34	2875.75	3777.03	3985.18	5774.93	2430.46	2241.45	2428.7
M724T299			0.26204	0.574223	0.00124786	723.981	299.008						3803.12	5090.53	3243.06	3300.35	2907.46	3499.89	2572.02	2093.78	1503.91	1894.22	2112.74	2366.89	3158.46	3158.24	3116.44
M594T295			0.301213	0.512052	0.00125132	594.038	294.556						4731.05	4571.66	2461.17	4495.31	4245.95	3599.6	2757.53	1710.01	950.416	2046.45	2544.52	2333.96	3492.68	3593.49	3594.14
M736T268			0.153883	1.91236	0.00126599	736.26	267.994						743.778	732.394	623.023	338.723	601.014	611.339	1103.17	1670.39	904.999	1149.64	974.821	1177.62	985.416	1040.78	1040.86
M671T122			0.475701	0.499667	0.00127113	671.271	122.177						10559.1	13409	11066.7	11336.7	9003.57	6649.5	5359.92	3086.54	3443.25	5295.52	6165	7641.4	8293.36	8070.86	8066.05
M406T293			0.167862	0.439373	0.00127296	406.029	293.288						1536.65	955.119	924.698	1506.86	1329.71	796.034	632.392	467.608	267.989	559.613	750.245	419.325	1005.6	1038.08	1005.42
M468T299			0.220201	0.565869	0.00127564	468.004	299.123						2562.81	3494.2	2087.98	2381.83	2138.87	2871.54	1574.06	1101.58	1873.12	1050.36	1498.6	1694.32	1913.53	2095.89	2098.57
M209T109			1.50911	0.256337	0.00127643	209.118	108.915						85794.6	62785.4	37427.1	109630	59487.9	46246.4	11042.4	15142.9	9473.1	28063.6	18164.1	21000.3	45154.9	45818	45823.9
M393T231			0.396315	3.53622	0.0012808	393.161	230.509						486.022	1722.66	3268.99	1691.99	754.957	351.718	6398.74	5399.78	1988.16	6041.88	5147.29	4291.11	3068.32	3023.9	3148.27
M225T422			0.305705	0.370841	0.00129081	225.003	422.277						3315.29	1983.7	1548.06	3522.52	3893.36	3660.87	777.306	860.398	790.307	1560.62	1551.45	1106.8	2012.79	2181.82	2005.82
M174T235			0.291517	0.419704	0.00129113	174.077	235.357						4508.43	2439.07	3288.37	3309.23	2856.16	2911.31	875.642	655.144	676.067	1365.61	2241.93	2291.17	2905.6	2907.79	3043.97
M339T162			0.453604	3.31424	0.0012929	339.227	161.964						1104.41	2267.37	2161.53	2990.61	1792.46	1577.45	5003.02	11413.6	5170.93	5089.08	6547.18	6195.2	4004.36	4004.54	4144.23
M210T149_1			0.43624	2.62942	0.00129981	210.017	149.416						1343	1054.37	5212.42	639.644	2989.93	5754.86	5783.29	8864.61	7472.91	6148.18	7613.13	8802.89	6526.53	6675.66	6439.19
M237T28			0.618417	2.25697	0.00130185	237.012	28.309						5583.7	9517.24	12201.8	3220.91	4041.58	3779.8	10094.3	17471.3	14559.9	14135.2	13814.3	16468.5	11152.2	11438.3	11137.6
M598T208			0.194187	0.608819	0.0013104	598.147	208.213						2901.95	1984.34	2054.41	2401.69	1669.38	2350.04	1428.87	1325.08	990.456	1685.19	1453.94	1251.39	1803.63	1907.77	1803.27
M658T57			0.46236	2.87006	0.00133093	658.121	56.5965						124.394	2599.35	5110.46	4449.76	783.806	405.3	6384.68	6560.21	5642.01	6177.1	8143.46	5761.01	4646.68	4645.07	4775.55
M540T343			0.310684	3.08463	0.00133489	540.276	342.813						383.892	1601.96	2198.95	911.173	293.24	244.121	2061.43	2914.59	1989.05	3328.1	3259.04	3824.56	1733.66	1733.13	1807.78
M172T71			1.92523	0.353607	0.00133738	172.024	71.414						176853	127971	77950	74538.5	113977	136578	26717.7	39424.5	16177.6	49510.7	54665.8	63810.6	107263	108210	108216
M339T90			4.4717	3.43271	0.00134901	339.253	90.019						117919	151909	445408	52623.5	162071	137787	477721	554983	385165	737180	569896	940222	400195	406132	400121
M421T387			0.236581	2.13129	0.00135209	421.207	386.673						609.869	1697.86	1547.99	1024.81	751.144	752.936	1877.01	2552.69	1937.64	3142.06	1969.96	2128.05	1636.8	1703.92	1703.79
M699T28			0.551284	3.2479	0.0013541	699.115	28.224						674.746	6234.02	6346.48	519.331	1995.76	1595.31	6505.31	12606.1	11954.5	7565.11	9455.61	8315.3	5902.16	5905.21	6648.28
M271T440			0.169749	0.489222	0.00135476	270.976	440.456						1455.63	978.069	647.323	1220.66	1311.63	1174.01	442.93	488.166	380.453	768.171	540.25	700.537	876.23	900.379	877.232
M624T168			0.334393	0.325383	0.00135566	623.994	168.331						3690.94	4759.02	1780.16	4803.67	2794.93	3946.49	466.893	1713.1	1825.04	871.99	1859.02	349.227	1733.15	1732.12	1698.09
M323T162			0.385654	0.610548	0.0013672	323.043	162.06						9052.49	7141.05	6617.09	7107.22	11319.2	8681.26	5761.44	4812.62	5110.48	4811.3	5399.29	4582.43	7104.42	7104.23	7237.39
M336T114			0.383248	2.20288	0.00136807	336.253	114.08						3381.93	1488.4	4781.9	537.568	3123.57	2946.05	5276.16	6203.92	4323.47	6439.9	6240.72	7333.42	4886.99	4977.43	5065.71
M774T171			0.306802	1.92199	0.00137261	773.579	170.963						2333.95	1743.35	3394.56	1654.13	3108.02	2170.77	3531.42	6004.83	4355.78	5726.42	4166.18	3901.19	2646.63	2695.14	2648.48
M169T66			0.60789	0.231328	0.00137446	169.033	66.355						15945.3	9003.39	4893.68	13012.8	7219.6	12732.1	2446.72	1393.4	3373.91	890.192	5475.81	948.96	7329.59	7106.08	7338.99
M250T50			0.731479	0.369004	0.00138456	250.072	49.9935						19477.8	18864.3	6011.56	19781.6	17030.4	20864.4	2983.46	6051.44	4521.65	7406.33	9664.49	7022.1	11769.7	9910.15	10005.1
M491T236			0.314499	0.331342	0.00138623	491.263	236.429						5163.53	4081.16	2511.59	2905.31	2144.36	3317.28	930.026	603.556	783.734	2240.2	1159.66	950.491	2561.29	2561.28	2677.6
M229T202			0.632615	2.05113	0.00138698	229.061	202.448						9197.85	2132.01	13256.6	10639.2	8021.94	9614.43	17239.5	18533.3	12296.4	20246	17023.4	23088.4	13374.4	13504.1	13373.4
M629T306_1			0.170354	1.22462	0.00138872	628.767	305.926						3447.43	2817.52	3054.77	2569.15	3089.28	3463.31	3938	3760.34	3464.85	3731.24	3822.32	3867.07	3383.26	3430.9	3383.48
M1073T166			1.40312	3.43926	0.00138987	1072.62	165.655						18229.8	12173.4	44519.8	810.018	15933.8	12374	56816.8	69115.8	33458.7	42986.9	81217.4	74227.3	44821.7	44821.9	44919.4
M369T187			0.532897	3.25308	0.00139229	369.237	186.721						470.62	2670.95	8447.15	1362.94	1391.99	718.68	6551.67	9260.98	9155.97	7744.04	8067.6	8218.63	6187.83	6786.16	6179.51
M153T28			3.20947	3.28617	0.00139249	153.055	28.404						29341.9	243775	214434	19149	33008.7	21582	222567	366000	358629	257706	324201	315393	192825	194670	192826
M882T302_1			0.188201	1.94544	0.00139434	881.768	302.134						1446.81	842.627	426.725	577.911	1288.95	1593.95	1811.67	1798.83	2241.7	2302.26	1719.84	2142.62	1648.4	1648.39	1687.65
M231T388			0.162128	0.582337	0.00139604	231.062	388.044						1607.85	1177.13	983.119	1130.01	1491.17	1440.45	925.447	816.526	420.53	702.487	789.363	905.19	1019.89	1041.6	1046.13
M313T59			1.42477	2.19857	0.00139828	313.237	58.948						18033.3	25158.6	73345.3	42010.2	19837.2	41153.7	75941.8	87804.3	93818.2	79236.5	88691.2	57179.4	55522.9	58552.5	55522
M268T107			0.227356	0.691443	0.00139944	268.191	106.772						4306.3	3591.11	4070.63	4896.71	4807.85	3582.33	2167.97	3178.97	3263.39	2784.55	2701.21	3366.26	3755.59	3819.51	3818.51
M768T293			0.532633	9.48014	0.00140021	768.424	293.14						44.1489	1849.85	2443.84	48.4536	102.119	139.33	4621.23	11706.9	10347.6	9187.8	3697.27	4310.92	3709.63	3736.78	3703.4
M375T307			0.128959	0.460067	0.00140377	374.891	307.428						811.721	719.596	498.575	855.61	488.454	622.351	195.279	161.358	254.019	488.148	321.787	417.977	506.268	525.299	508.381
M281T441			0.348773	0.37662	0.00140536	281.027	440.685						5122.42	3312.2	1821.71	4402.21	4478.34	4097.94	961.486	942.545	700.74	2445.58	1756.41	1943.95	2764.86	2764.9	2677.01
M581T158_2			0.819432	2.45917	0.00141698	581.32	158.246						17187	5102.66	11091.3	1174.52	16594.3	14803	25416	27233.6	16173.5	29492.5	29147.8	34726	20663.5	20572	18841.3
M948T190			0.47643	2.63701	0.00141847	947.52	189.731						5511.67	1608.8	6370.68	278.449	3501.31	970.589	8749.13	9841.41	6168.32	7388.36	7888.01	8067.8	5835.14	5918.62	5819.34
M681T366			0.955663	0.284921	0.00142043	681.129	366.08						25699.4	25700.2	13197.7	45750.1	28190.4	23427	6868.2	6030.16	4959.86	11612.3	9110.85	7565.72	16616.9	16691.1	16541.8
M357T416			0.216566	0.541819	0.00142143	357.102	415.966						2992.68	2944.86	2489.01	2710.42	1862.96	1815.87	1467.99	840.95	1011.52	1685.25	1751.78	1270	1764.87	1767.68	1849.82
M428T420			0.253644	1.75382	0.00142308	428.056	419.674						1653.1	2370.5	2432.16	670.54	2041.53	2463.32	3762.07	3904.7	3053.18	2785.11	3643.35	3250.52	2206.93	2264.82	2264.72
M722T32_2			0.834672	2.1177	0.00142576	721.574	31.772						7128.96	17800.8	19179.6	12718.5	7062.97	12837.7	31406.7	35516.9	28420.5	18440.4	22038.5	26665	17144.7	17597.5	17597.2
M690T423			0.510926	1.941	0.0014258	690.082	423.109						7613.1	5649.89	9295.13	1765.23	5633.8	7310.89	12617.7	11923.7	11474.9	8483.84	14416.5	13420.7	8714.8	8716.74	8703.39
M441T470			0.136319	1.62567	0.0014309	441.031	469.582						826.374	523.777	949.691	403.219	824.324	873.089	1117.91	1257.05	1385.85	1136.93	989.646	1266.33	914.761	914.744	930.235
M281T465			0.223957	0.145625	0.00143098	281.003	465.474						1737.44	1727.18	1602.79	1649.97	66.5208	1715.19	405.093	191.319	79.589	100.726	384.804	76.146	685.127	312.235	311.36
M610T176			0.376582	1.8903	0.00143321	610.405	176.454						2750.77	2152.68	6252.8	2099.07	3740.5	3322.23	6058.11	6249.51	6278.29	5652.62	7717.32	6451.33	4651.35	3784.39	4651.12
M916T30			0.463518	1.80779	0.0014363	915.596	30.222						8596.08	4348.29	7768.3	4802.93	6633.05	10332.4	10377.7	11686.1	14439.6	11898.2	16550.2	11845.2	12871.6	12856.5	12562.3
M391T160			0.737475	3.49802	0.00143657	391.234	159.554						1562.4	5210.2	8199.13	9874.69	1465.57	1303.41	12009	25616.4	18256.1	11581.7	13810	15325.9	11134.3	11129	10492.6
M727T36			0.883469	0.321863	0.00143719	726.509	36.1055						42074.9	29228.5	19274.1	27465.7	24869.4	20040.6	9905.46	20400.9	6404.19	7563.71	5612.82	2561.5	19980.6	20665.8	20730.2
M571T235			2.06629	4.50333	0.00143747	571.288	235.082						35977.2	4835.24	76343.1	5542.49	31703.7	14199.9	145624	151622	32514.6	122032	167267	140208	66535.8	66481.2	71307.7
M287T161			0.615793	0.109312	0.00144509	287.185	160.946						13897.8	5414.02	4509.36	4549.86	10249.1	12627.5	1268.96	1561.99	595.486	1380.68	637.138	157.764	3948.1	4126.16	3953.16
M337T37			0.822037	2.36286	0.00144556	337.309	36.963						11645.3	3529.61	18366.3	1705.08	13568.7	19145.2	28797.8	28295.8	24841.8	21584.4	34253.8	22806.8	15398.9	15225.3	15217.5
M794T435			0.216272	5.31275	0.00144727	794.367	435.029						85.8642	342.727	665.047	67.7935	120.374	161.01	1064.04	1100.06	491.497	1236.6	1924.35	1848.77	834.54	834.222	789.521
M300T130_2			0.497315	5.23747	0.00144848	300.217	129.516						753.485	582.522	4362.85	517.995	695.312	670.633	3677.82	7443.32	3197.08	8112.61	7524.1	9759.76	4612.54	4759.82	4779.54
M736T302			0.197372	2.29744	0.00145213	735.798	301.548						784.124	426.315	1270.33	51.8178	520.967	1197.6	1381.18	1934.23	1561.58	1538.8	1496.76	1854.25	812.966	848.474	849.109
M134T308			0.169935	1.46956	0.0014539	134.047	307.898						1031.86	1587.01	1739.62	1459.99	892.847	1175.41	1763.87	1931.06	1970.13	2068	1884.84	1972.13	1371.68	1371.69	1490.78
M337T494			0.248566	0.616335	0.00145736	337.039	493.698						3648.17	3974.48	2280.47	3891.97	3421.7	4186.4	2589.9	2179.12	2428.12	1549.7	2297.84	2146.86	2529.23	2573.78	2532.52
M382T317			0.287334	0.400773	0.00145913	382.113	316.908						2987.26	2998.79	1682.86	4258.77	3723.38	2117.91	947.702	1075.54	818.507	1530.48	1411.97	1337.12	1993.07	2071.03	2071.04
M405T203			0.194171	2.20578	0.0014666	405.31	202.651						736.063	1024.61	676.82	758.819	494.766	883.186	1798.14	1821.56	916.039	2193.94	2068.16	1291.98	1078.36	1103.99	1117.3
M580T340			0.209373	1.66652	0.00147262	580.308	339.692						1393.09	1561.42	1982.48	1014.46	1584.4	1419.21	1874.96	2321.53	2311.53	2350.28	2902.49	3163.03	1428.97	1448.25	1429.02
M438T299			0.200008	0.440956	0.00147357	437.995	298.996						1648.56	2565.28	1334.09	1567.29	1341.23	1347.36	1057.19	564.939	590.087	564.891	681.205	864.746	1144.97	1209.92	1212.07
M191T493			3.61403	0.446051	0.00147862	191.02	493.024						873383	628182	567014	679950	355398	447508	323275	259834	271792	223139	267993	238088	285555	287943	287954
M458T345			0.349725	3.44208	0.00148937	458.271	345.396						234.918	1604.46	2895.53	1016.3	187.989	173.035	2878.72	4822.62	2693.65	4447.18	3176.45	3020.14	2492.55	2388.38	2493.56
M927T300			0.184519	1.52396	0.00149864	926.799	300.29						1701.53	1323.17	2002.85	811.338	1537.21	1953.12	2272.34	2460.68	2409.4	2164.38	2463.48	2447.07	1763.05	1754.25	1598.83
M848T145			0.33252	0.540229	0.00150491	847.551	144.936						8531.57	5787.83	5706.32	5435.06	4450.68	4939.75	2429.23	3377.45	3093.27	2929.82	3042.23	3955.62	4981.12	4750.5	4750.3
M919T189			0.743368	3.57663	0.00150825	918.558	189.438						2072.38	3738.11	15323.7	1579.31	1944.65	1513.06	13290.1	16512.7	10331.5	19489.6	18095.3	15885.4	9555.12	9196.19	9554.76
M281T28			1.25431	0.117659	0.00150999	281.142	28.2595						46454	16291	25069.4	18449.4	56924.4	49947.3	2884.23	2907.73	2003.88	5230.66	7766.06	4284.65	20215.3	21419.8	20180.3
M903T175_1			0.767719	3.38591	0.00151326	902.581	175.005						148.944	3807.26	13768	717.432	12618.9	801.385	13317.2	20071.7	14936.6	16845.9	20063.5	22646.7	11979.2	11966	10257.9
M554T78			0.868958	0.285531	0.0015167	554.427	78.373						11331.4	25613.4	33889.4	29938.2	19497.2	17915.6	3118.02	5359.14	2647.49	9218.86	5426.35	13686.3	16343.1	16287.1	17291.3
M614T166_1			0.321207	0.14579	0.00152236	614.142	166.357						3239.23	3659.8	1166.18	3524.93	962.069	3275.24	203.967	304.476	232.476	1071.39	120.911	374.256	1511.79	1640.57	1485.09
M539T164			0.480824	0.166208	0.0015235	539.156	163.754						2899.7	8161.62	4503.43	10236	7130.24	4284.75	851.63	233.753	610.376	2938.02	654.374	897.394	4791	5040.13	5039.29
M320T56			0.296793	0.715839	0.00153766	319.879	55.901						7468.35	6333.16	7396.55	6865.21	6352.87	6754.95	3063.04	5446.8	4565.64	5136.94	5755.46	5503.98	5508.36	5704.33	5556.15
M161T303			0.232008	1.38446	0.00153832	160.967	302.812						3670.35	3159.33	4496.78	2725.99	2849.82	4177.78	4833.97	5061.79	4851.82	5016.25	4380.29	5040.34	4320.04	4322.04	4422.79
M163T175			0.593175	0.434129	0.00154746	163.061	174.768						10212	10420.5	13354.2	13067.6	20213.9	16432.8	6319.41	4418.95	3556.52	7082.71	10103.5	4856	11287.2	11287	10956.7
M1120T178			0.663205	3.88487	0.00154884	1119.66	178.218						1599.54	2357.56	11525.4	87.9485	3309.77	438.388	12656.9	7955.7	9688.85	13907.8	16452.2	14388.9	8978.02	8977.81	8515.2
M1115T301			0.180648	2.09101	0.00155462	1114.69	300.881						1104.14	643.161	990.137	232.738	579.88	966.045	1409.14	1768.71	1685.2	1640.77	994.613	1944.79	971.569	1055.24	975.321
M662T241			0.396864	2.80158	0.00155577	662.351	240.75						1044.6	3943.71	2507.06	2383.87	822.594	829.909	3467.54	7266.38	5112.97	7163.26	4448.04	4848.96	2682.56	2678.61	2482.71
M427T305			0.263607	1.42331	0.0015708	426.869	304.728						5377.1	4328.19	4828.64	3261.97	3269.53	5284.77	6034.27	5869.46	5647.12	6452.66	6854.03	6647.01	4706.33	4211.3	4703.91
M751T234			0.37255	2.33804	0.00157459	751.261	234.478						2438	1916.1	4026.26	823.224	2171.94	2289.04	4949.62	6425.6	3077.85	4770.11	7033.51	5691.64	4351.27	4517.13	4518.51
M405T402			0.250446	0.401237	0.00157462	405.042	401.949						1919.97	2680.06	1574.06	2970.03	2145.7	1705.62	543.462	333.939	512.424	1575.95	1285.68	962.795	1631.65	1633.93	1715.92
M941T369			0.18105	2.72441	0.00157874	941.483	368.81						841.49	787.795	791.974	149.092	17.4556	33.9981	1106.42	1158.62	991.437	1224.72	1299.5	1362.18	817.029	816.737	811.524
M580T64			0.590893	3.77143	0.00158214	580.227	63.75						3038.22	4399.16	2452.6	4174.91	2744.47	1492.15	7436.25	12817.2	18658.6	7005.86	14772.6	8332.2	3960.8	4081.41	3839.35
M390T331			0.274692	0.447026	0.00158985	390.107	331.307						3184.63	2464.95	2243.52	2665.21	3694.96	2621.51	1002.68	496.59	810.29	1753.44	1044	2436.47	1953.08	1992.31	1953.73
M721T179			0.488738	2.06901	0.00160042	721.353	178.894						4344.27	3889.85	8359.16	2546.15	7037.73	4849.45	12637.7	7283.68	9281.13	9950.32	13603.7	11437.9	9530.34	9533.21	9416.97
M457T172			0.929279	0.269891	0.00161349	457.278	171.712						21093.7	18417.6	29938.4	10470.4	39587.8	31704.6	5723.45	6369.73	6253.8	7416.93	7627.41	7419.57	15958.4	16812.1	16817.7
M844T175			2.81284	6.73655	0.0016187	843.548	174.84						1134.83	10693.4	162063	12336.5	2446.92	2764.22	99052.8	226008	284271	316952	139712	223638	78712.2	81614.2	81612.5
M939T175			2.07823	4.77352	0.00162021	938.586	174.908						1622.46	14914.7	113359	5985.9	1242.74	1739.37	73293.1	120188	93630.1	125200	115435	135125	71278	71825.8	71840
M855T38_1			0.788863	0.395883	0.00162157	854.551	37.617						22126.7	20983.1	17407.1	10742.9	28791.2	28259.5	3834.69	6938.78	10613.7	7650.85	11667.4	10090.4	15925.4	15909.1	14649.9
M601T234			0.748598	4.93969	0.00162656	601.355	234.37						4762.42	1606.48	5706.81	493.641	4046.99	3146.5	16968.6	27855.3	9765.65	20347.5	14089.3	8595.98	8257.64	8687.42	8268.52
M437T213_2			0.34721	0.351821	0.00162681	437.143	212.771						4236.83	2800.08	3254.95	3929.57	6555.07	3276.82	945.982	792.332	810.523	1939.14	2186.8	1787.69	2667.56	2639.97	2666.8
M250T386			0.169408	1.914	0.00162785	250.006	386.024						1006.35	694.718	715.478	534.031	716.093	1158.5	1623.57	1382.7	973.068	1506.64	2019.91	1729.48	1033.04	1032.73	940.91
M344T56			1.38245	3.28684	0.00162997	344.112	56.479						28534.7	31600.6	28541.2	1140.59	10533.2	16097.1	42683.8	89714.7	78059.4	61030.5	78389.5	32866.6	29856.8	30634.6	30630.6
M331T408			0.414697	2.83478	0.00163245	331.172	408.247						375.911	4551.08	2892.1	2436.16	644.855	436.205	5725.66	6899.74	4786.16	5385.03	3767.13	5572.28	3525.84	3528.7	2552.7
M834T301			0.161113	1.97701	0.00164056	833.775	301.337						794.077	138.189	894.993	887.769	488.802	758.604	1258.95	1502.58	1344.35	1565.29	942.556	1220.04	767.981	726.072	767.575
M291T112			0.454276	0.624279	0.00164384	291.086	111.851						13957.5	14361.7	16518.7	12561.5	17859.9	11202.2	10890.7	11621.1	9144.13	7052.42	7495.82	7771.86	10859.2	10263.6	11505.7
M329T355			0.496343	2.80999	0.00164834	329.218	355.016						482.991	5840.22	4565.17	4102.95	749.106	630.317	6507.6	9744.61	5989.67	9084.07	8113.74	6561.97	4683.74	4917.85	4919.6
M1096T190			0.433964	3.58154	0.00166152	1095.53	190.371						484.586	3043.97	4191.69	327.868	290.411	319.496	6264.49	7009.23	5154.92	4835.18	3914.1	3831.17	3789.07	3890.33	3896.46
M605T455			0.553118	0.316455	0.00168497	605.192	454.526						10329.3	8826.04	5398.99	9735.06	15266.1	7276.2	1755.06	1779.62	1108.78	4933.09	4440.69	3967.4	6328.73	6326.8	6090.26
M1150T234			0.209574	2.49832	0.00168724	1150.48	233.793						523.901	39.8452	1175.35	1138	426.652	624.472	1832.21	2020.56	997.401	1480.36	1787.01	1696.37	1072.6	1115.42	1116.66
M535T115			0.636369	0.409317	0.00168836	535.056	115.451						14693.8	22297.2	11303.9	18508.9	11535.1	11114.6	5694.8	6580.35	4438.19	9222.1	3296.07	7383.4	13905.4	15209.7	13628.5
M668T22_2			0.098557	1.67386	0.00168886	668.343	22.208						366.438	307.602	372.347	481.018	223.83	342.41	544.131	519.351	690.076	529.483	742.433	479.005	452.184	450.739	478.823
M1078T298			0.198571	0.358464	0.00169275	1077.93	298.293						1802.06	2097.4	1189.5	1244.2	1104.28	1281.22	1006.68	511.313	174.876	79.329	824.412	528.711	1136.2	1145.62	1139.66
M785T87_1			0.183598	2.19676	0.00169366	784.59	87.2985						763.713	1157.56	730.709	141.931	733.604	996.331	1380	1233.23	2032.96	1517.49	1545.72	2228.43	661.399	558.948	659.208
M1023T155			0.422478	3.53564	0.00169815	1022.57	155.173						2583.25	1023.22	3488.08	173.878	713.986	1387.82	6203.05	7808.12	3099.14	3570.97	7227.11	5221.33	4036.88	3840.99	3843.09
M1069T190			0.442408	2.55193	0.00170018	1068.51	190.354						723.523	5238.15	4865.03	843.656	1908.85	1827.27	7609.22	7958.68	6886.56	6175.81	5782.69	4903.32	6047.68	5988	6047.7
M705T179			0.852919	2.39791	0.00170113	705.35	178.964						9403.27	8055.22	23332.2	2700.22	12762.6	13802.5	28327.8	20871.3	20870.9	31062.2	37484.9	29371	20636.9	20688.4	20717.2
M1108T167			0.429011	2.45183	0.00170322	1107.59	166.815						3663.92	1076.41	5809.28	722.948	2831.51	2490.09	7712.72	6567.05	5278.1	4995.4	8052.33	8080.51	7474.84	6726.37	6724.75
M772T65			0.830424	3.0609	0.00171688	772.291	65.04						560.356	16191.7	9029.58	10858.5	2264.87	1617.23	18471.4	27951.1	25088.6	14929.7	21029.7	16563.6	11015.9	11002.6	11394.4
M357T318			0.603275	3.06113	0.00171877	357.249	318.195						1031.44	8676.04	4982.58	5037.36	1423.44	1195.05	12196.6	16186.3	7913.96	13800.7	9305.04	9001.16	8513.37	8508.97	8357.7
M1140T231			0.269181	4.44049	0.00172505	1139.55	230.611						554.775	70.1113	1024.82	33.0084	622.581	649.434	2444.51	1753.09	985.032	1567.43	3225.19	3145.18	1342.8	1418.41	1350.53
M505T61			3.49324	3.56339	0.00173245	505.255	61.101						106335	112399	242319	35634.8	120515	98450.1	232620	377958	668038	317929	573043	380561	227160	227414	226446
M605T301			0.547154	1.41493	0.00173698	604.863	300.908						20536.4	15925.1	21403.1	11411.3	17450.2	22291.7	26560.7	25606	24494.7	26417.8	23566.3	27606.8	20987.6	20979.9	20538.5
M730T169			0.266798	0.328052	0.00174014	730	168.996						2506.17	2855.62	954.909	2990.84	2037.27	2501.8	1356.8	1069.01	754.714	203.902	1056.33	101.644	937.122	983.024	1032.62
M487T404			0.231725	0.312095	0.00175355	487.034	403.714						2492.8	1866	1126.27	1757.3	1734.94	1189.99	144.033	113.919	148.055	1175.91	850.838	740.41	1232.19	1237.62	1395.04
M718T406			0.226854	0.352703	0.00176408	718.157	405.658						1636.01	1815.69	1258.17	2863.93	1135.44	2353.59	785.81	716.842	751.059	241.407	730.566	676.207	1452.87	1452.66	1400.24
M1003T302			0.177372	2.36107	0.00176767	1002.7	302.166						591.61	896.487	727.319	51.708	353.202	645.947	1116.94	1696.96	1507.8	1406.64	849.325	1134.23	567.808	558.7	545.749
M884T302			0.19905	2.36912	0.00177438	884.261	302.142						624.92	600.379	1399.54	253.932	219.967	793.038	1138.57	1453.74	1398.39	1564.84	1687.41	1977.14	950.962	951.969	946.668
M465T287			0.384091	3.35836	0.00178249	465.239	286.856						514.588	2563.28	2046.98	1914.68	478.762	423.997	3927.98	7114.98	4443.3	5089.17	3323.51	2774.15	2687.52	2687.02	2655.24
M785T301			0.697488	1.47158	0.00178327	784.787	300.864						29630.1	22878.5	31016.7	14643	23925.9	33180.3	38220.6	39803.7	36530.9	38911.8	35083.4	39948.5	29663	30202.6	29992.4
M834T108			0.321612	1.54713	0.00178597	833.6	108.029						5473.88	2740.69	5078.47	5359.12	4755	3618.75	5682.54	7373.54	6142.68	6832.62	8090.01	7691.13	8386.22	8385.64	8659.17
M482T384			0.203307	4.10991	0.00178843	482.218	384.152						154.669	486.943	482.025	267.07	270.476	162.671	1354.4	1183.17	464.917	1015.47	2081.68	1396.25	647.713	675.718	667.438
M721T213			0.12674	0.587204	0.00178969	721.148	212.789						755.894	1182.59	853.52	1014.6	1185.15	998.596	820.204	348.773	555.441	500.016	721.891	571.233	974.683	931.143	975.485
M225T371			0.108221	0.673468	0.00180307	225.019	371.486						1055.46	737.488	892.186	776.582	879.696	809.404	643.325	563.696	599.098	708.086	593.177	361.528	635.778	671.698	674.013
M543T440			0.167527	0.345779	0.00180352	543.016	440.191						1136.01	697.732	381.262	1011.71	1053.51	879.535	208.462	124.332	155.198	575.809	355.165	365.171	551.216	522.722	514.475
M363T426_2			0.144021	0.728437	0.00180381	363.068	425.845						1794.26	1826.09	1951.63	1429.24	1901.92	1671.92	1311.94	1334.28	1201.73	1016.47	1207.1	1631.74	1477.09	1478	1363.09
M967T183			0.513009	2.33828	0.00180791	966.561	183.407						2169.01	4649.07	8777.16	2139.54	4552.67	2997.94	10846.9	10110.5	5612.45	10463.5	11577.2	10513.7	7488.51	7659.37	7659.42
M1016T229			0.302253	4.29033	0.0018101	1015.52	229.387						356.031	240.842	828.457	1709.93	448.868	137.815	2768.8	2627.75	913.526	2272.93	3766.78	3618.55	1377.23	1375.47	1233.02
M385T107			2.40392	5.04449	0.00181336	385.138	107.045						1447.91	73067.1	44954.5	28038.8	32080.6	18536	101625	239609	243288	124392	212913	77611	86686.2	94134	94115.5
M999T181			1.13655	2.07991	0.00181527	998.626	181.294						35307.4	16017.2	46469.2	4517.63	31432.7	25683.7	62782.7	53631.6	42695.6	52193.2	63924	56368.7	47807.4	47818.3	46854.9
M1074T165			1.54945	3.83633	0.00181842	1073.63	165.256						20060.3	10731.8	47219.7	3646.59	17364.5	13331.4	64840.9	87272.5	33804	49823.3	104826	90461.7	50377.5	50826.5	50376.7
M1021T302_2			0.21839	1.46365	0.0018194	1020.68	302.178						2952.72	2325.15	2759.47	1310.9	2336.44	2781.33	3575.4	3921.07	3708.36	3355.19	3428.08	3185.04	2981.94	2942.7	2981.98
M680T103			1.63028	4.83073	0.00182661	680.209	103.344						4868.21	36725.8	40265.4	3990.26	5568.04	3841.7	31058.7	125562	84976.2	68929.2	66489.4	83156.7	70341.3	77098.8	70558.6
M554T166			5.60392	2.80917	0.0018295	554.296	166.183						240390	174724	903247	28350.6	452601	449128	992406	1.20065e+06	679629	877960	1.20627e+06	1.35933e+06	913175	921190	913213
M1194T236			0.250702	3.74405	0.00183388	1193.59	235.759						715.764	329.92	1130.71	119.798	388.171	431.848	1940.43	2153.86	898.968	1399.86	3101.59	2172.52	1466.42	1351.99	1466.35
M195T231			0.143501	0.645583	0.00183588	195.087	231.43						1218	1755.01	1357.77	1647.87	1256.67	1337.63	1228.7	771.35	743.503	863.256	1103.93	823.811	1126.61	1153.23	1135.04
M226T301			0.418853	2.30271	0.00184531	225.99	301.494						953.006	1904.54	5550.52	4717.65	1700.17	1565.86	6180.48	7045.78	4762.93	6502.94	6272.05	6981.19	4203.29	4756.54	4764.91
M295T189			0.506638	0.241632	0.00185021	295.19	189.122						4419.57	7250.67	8421.35	11914.9	4846.42	8634.66	433.806	1540.89	347.778	5519.76	1214.87	1934.15	3709.84	3847.96	3715.23
M557T30			0.594965	0.214157	0.00185138	557.13	29.5885						14613.4	7922.61	3103.69	11995.6	7915.27	10535.8	249.648	822.944	1186.49	4372.83	1915.76	3463.61	6352.8	5806.51	5801.66
M369T441			0.619559	0.339987	0.00185163	369.006	440.685						15555.6	9609.97	4885.29	13209.3	14443.6	11783.8	2442.95	2094.39	1846.16	7248.06	4245.38	5747.98	7954.97	7985.01	7954.81
M883T300			0.593309	1.48266	0.00185302	882.765	300.268						22014.1	16930.7	21507.5	10269	16216.3	22295.7	27129.7	29195.2	24931.8	27855.1	24118.2	28726.5	21624.4	21620.9	20910.7
M361T268			0.326167	0.421273	0.001856	361.221	267.942						5301.67	5583.47	3755.26	5530.99	4128.03	2377.96	2245.4	840.108	1482.2	2809.43	1219.83	2641.5	3669.51	3731.61	3669.17
M407T381			0.154551	0.478603	0.00186327	407.078	381.257						1136.24	806.778	516.967	773.809	1254.79	997.08	385.255	424.569	323.918	472.527	506.63	512.552	630.814	662.047	630.108
M295T385			0.12529	1.6632	0.00186664	295.067	385.433						454.181	377.218	588.462	706.457	658.84	555.772	1030.76	940.994	637.545	814.365	1138.69	994.303	581.906	613.18	587.065
M100T205			0.205018	0.441686	0.00186778	100.003	204.616						1663.97	1618.05	1353.9	1018.15	1514.87	2504.63	672.745	497.848	592.794	659.568	882.622	967.107	829.72	829.728	850.998
M632T55			0.639424	0.425148	0.00186834	632.24	55.364						21554.1	11112.6	14467	15617.2	21909.9	15261.8	6858.29	8800.11	9908	11044.2	4618.75	1252.56	13681.8	13455.6	13682.3
M1080T179			0.443193	2.44586	0.00187697	1079.63	179.44						3549.08	2228.7	6379.11	224.999	2794.36	2492.34	7700.07	6881.54	4897.77	6806.86	9405.61	7522.97	5283.98	5488.9	5271.78
M368T287			0.368493	0.585915	0.00188115	368.107	287.289						7390.47	8791.3	4809.75	8604.86	6534.7	7123.36	5382.78	4520.41	2532.8	4230.93	4701.64	3974.86	6177.73	6168.74	5843.63
M293T342			0.264181	0.508778	0.00188257	293.066	342.27						2558.81	3831.71	2432.25	4625.35	3078.75	2720.12	2029.36	1448.59	1249.68	1991.16	1759.48	1314.18	2330.03	2330.12	2310.4
M95T53			1.97682	3.72071	0.00188328	95.0247	53.243						6900.18	71548.9	73273.7	11209.4	3336.85	6974.75	118035	120178	153501	70980.2	108271	73625.1	64766.8	66317	64747.3
M830T99			1.5267	3.49652	0.0018867	830.251	99.388						12806.9	47853.3	38938.7	3619.76	13896.3	8218.03	78731.8	57425.6	113727	77849.8	70329.8	40165.4	47339.4	52514	52879.7
M354T427			0.561487	0.369852	0.00188898	354.053	427.138						7625.85	13160.4	8464.04	15754.5	8890.13	8990.21	2165.03	2336.63	2058.15	3611.94	6388.36	6698.03	6537.87	5114.51	5118.04
M409T307			0.217269	2.75812	0.00190321	409.218	307.292						213.922	652.846	718.348	1255.83	425.708	231.789	970.681	2129.94	1338.07	2109.93	1411.51	1689	930.679	838.41	925.428
M939T301			0.270572	1.41854	0.0019099	938.731	301.119						4972.28	4025.08	5114.89	2548.05	4038.05	5288.46	6141.85	6481.1	5819.51	6229.4	5840.41	6351.03	4922.47	4972.25	4972.43
M644T251			0.301534	3.45887	0.00191718	644.359	251.032						414.579	933.884	2466.72	267.411	171.655	313.976	2159.55	2810.91	1661.12	2705.89	2862.18	3601.26	1587.46	1584.72	1301.48
M515T417			0.326206	2.34495	0.00191919	515.281	416.89						601.007	2639.78	2302.25	2764.17	621.695	453.804	3862.45	4282.8	2764.12	4032.61	3669.21	3390.82	2748.74	2748.71	2770.57
M686T299_2			0.312397	0.472703	0.00192197	686.025	298.619						4092.5	6197.67	2773.96	4095.39	3265.32	3870.04	2264.63	2084.1	1175.06	1620.32	2345.71	1994.44	3232.88	3270.92	3248.1
M617T177			0.344804	2.1627	0.00192302	617.354	176.678						2320.29	2446.7	3551.2	2106.88	1447.91	1727.12	3314.24	4595.85	4322.23	4029.43	6631.23	6519.92	3665.32	3249.88	3646.46
M174T325			0.238022	0.389815	0.00194025	174.055	325.041						2323.88	1217.89	1759.7	1289.36	2872.75	1990.22	707.442	748.933	291.566	1109.16	729.651	878.106	1376.78	1376.03	1304.58
M536T62			0.733749	2.65216	0.00195089	536.173	61.913						4867.19	10872.6	7485.72	13470.6	2078.85	1402.13	17586.8	22999.4	12703.5	19234.8	21446.6	12585	15171.7	15159.7	13754.8
M417T307			0.136088	0.468606	0.0019604	416.901	307.223						1106.72	982.05	708.556	816.516	532.191	681.11	287.366	282.208	215.177	567.919	409.397	499.964	557.585	573.294	573.846
M431T193			0.933296	0.31623	0.00196841	431.095	192.833						29001.5	19734.8	11552.7	21897.3	30801.4	36586.6	2807.02	6812.99	2455.59	12530.3	12119.5	10574.4	16718.6	16717.3	16169.1
M496T229			1.16021	5.10662	0.00196879	496.266	229.422						8490.58	3484.31	14944.7	1714.84	10911.2	6373.7	41370.9	30990.1	14757.8	30191.4	65528.3	51654	23187.7	23361.8	23351.3
M958T186			1.2168	2.12463	0.00197648	957.591	186.073						51113.7	16292.1	39333.3	3005.57	41764.9	29854.6	74020.7	60671.9	56995.1	51957.6	74403.2	67283.4	41086.4	42650.7	42665.1
M129T460			0.798704	0.662224	0.00197715	129.019	459.926						45620.2	34651.5	26205.6	41765.8	42824.1	42481.9	28168.3	26978.6	21580.6	22915.7	28293.2	26725.3	21511.9	21447.7	18257.6
M339T37			0.97783	1.66861	0.00197909	339.325	36.7155						33121.7	26885.4	50610.5	20495.8	35010.7	22040.8	44631.3	57832.5	56956	48928.6	56739.3	48885.5	32320.6	34015.5	32173
M447T310			0.446107	0.37144	0.00198026	447.091	310.492						4544.84	5599.88	6189.25	8021.47	8083.73	11794.2	2540.91	1744.7	1887.06	3080.78	4321.76	2854.82	5390.35	5404.79	5696.67
M937T241			0.190959	3.4544	0.00198038	937.479	241.173						30.9513	43.4972	592.931	684.75	633.766	32.6442	1126.13	1058.15	858.427	1797.1	1306.28	826.765	357.295	370.685	370.336
M431T98			0.50549	2.48108	0.00199059	431.308	97.9635						5552.52	2272.48	5706.47	927.813	5910.37	6867.55	6538.77	11923.8	13835.3	11581.3	15077.1	8621.45	6953.37	8523.27	8528.16
M410T302			0.328563	1.29617	0.00199259	409.913	301.705						10293	8859.85	10257.6	6306.5	8873.96	10102.5	11803.2	11733.6	11268.1	12587.4	11494.4	12005.3	10272.7	10400.2	10404
M605T78			0.633591	0.385077	0.0019957	605.238	77.5505						20120	15171	21855.5	22113.4	13208.7	8363.28	4021.5	5624.51	6910.47	4750.49	6061.49	11459.6	15189.2	11213.2	11210.7
M173T332			0.396796	0.560766	0.00201024	173.045	332.497						5938.71	9140.02	6696.02	8675.76	6990.72	6847.83	3557.3	2859	2443.07	5988.03	4321.94	5666.45	5757.93	5784.07	5688.08
M467T188			0.4229	0.432087	0.00201092	467.225	188.38						6471.98	7034.53	6820.17	5174.35	7161.02	10201.9	3186.42	6014.63	1069.55	3777.51	1770.75	2702.09	6129.59	6114.26	5879.69
M1011T301			0.159458	2.24071	0.0020156	1010.76	300.555						865.609	430.158	486.299	375.15	206.289	1069.2	1040.95	1707.92	1060.15	1490.28	1162.89	1229.52	794.379	795.456	669.582
M240T45_1			1.06195	3.65569	0.00203285	240.069	44.7665						5152.48	9371.01	24463.2	7015.48	5331.27	4646.37	20942.8	35702.9	37105.2	25495.5	56511.8	28886.8	20598.8	21026.1	20586.5
M507T302_1			0.94529	1.38767	0.00203953	506.886	301.523						68408.1	51423.3	64014.5	35297.6	57756.6	65948.4	79350.4	83105.2	75601.2	80629.6	72645.9	84427.5	65389.9	66352.5	65402.9
M1082T179			0.496661	3.23816	0.00205464	1081.64	179.307						2591.81	1483.79	6267.59	195.642	2529.9	1624.97	9308.22	6766.91	4512.82	6374.17	11524.5	9093.94	5183.19	4809.4	5160.32
M163T30			0.915376	0.197432	0.00205926	162.893	30.2995						35886	35930.8	39346	28902.2	11853.9	10601.8	8346.65	6180.48	3580.1	2753.32	5200.58	6025.66	16635.6	16628.2	16212.3
M154T28			0.980028	2.99232	0.00205955	154.058	28.036						2298.39	24698.8	22486.7	4282.99	3197.18	2807.31	21379.2	34081.2	33919	25647.3	31775.9	32052.7	21340.5	22161.8	21341.5
M395T322			0.302891	2.09328	0.0020678	395.203	322.009						727.513	2271.73	3263.62	1749.64	842.308	948.356	3465.15	3706.74	3607.51	2722.98	3419.63	3598.78	1876.51	1782.5	1876.74
M557T266			0.454244	3.28765	0.00206892	557.292	266.49						634.337	3879.77	3990.76	1877.19	1027.21	492.262	7974.89	5617.52	3270.61	6014.77	9683.35	6566.94	3962.88	4058.93	3963.84
M210T194			0.219874	2.19042	0.00207725	210.063	194.173						425.814	1107.52	900.107	512.366	1365.43	1368.57	2490.55	2638.51	2111.93	1470.24	2343.28	1386.65	1746.16	1746.48	1613.45
M453T30			1.16228	0.262403	0.00208261	453.083	30.35						57561.8	24205.3	25967.9	19646.9	52056.6	44932.3	5798.78	10710.5	13498.6	12628.9	6794.95	9443.82	28355.8	29113	28354.9
M332T298			0.236843	0.382291	0.0020838	332.073	298.386						2329.79	2647.99	908.847	2392.24	2084.18	1439.34	802.506	417.553	549.603	1150.42	1026.04	565.823	1423	1422.82	1386.78
M722T180			0.652278	3.07114	0.00208385	722.359	180.034						3301.5	4804.15	6127.12	1301.49	7549.72	6772.74	15490.7	10615.4	9931.11	13309.5	16893.8	25453.4	10977.9	10006	10968.7
M311T182			0.831115	0.214501	0.00208474	311.076	182.265						32338.3	24268.5	7680.1	20176.7	21801.5	13640.5	10516.2	212.492	1051.53	6232.68	3798.04	3908.96	9436.46	9535.9	9438.14
M260T444			0.268199	1.89102	0.00208551	260.125	444.207						1170.83	2026.81	2671.66	1919.52	1215.78	1166.01	3115.19	3278.37	2095.3	4131.8	3389.31	3222.89	2219.3	2376.51	2377.14
M747T137			0.738159	1.94482	0.00209217	746.51	136.663						21918.4	8418.86	15770.9	8397.37	12630.2	16821.5	23737.1	35154	20712.6	23709.6	33613.9	26354.1	23369.2	22235.1	22234
M933T187			0.404586	2.14261	0.00209843	932.575	187.322						4508.44	3195.35	5545.57	120.604	3708.32	3249.31	7695.95	5758.78	5319.32	8877.95	7811.73	8090.31	6291.74	6284.4	5922.17
M375T441			0.218683	2.39606	0.00210587	375.186	441.34						304.336	1371.67	1131.54	815.046	272.802	183.671	1651.88	1929.29	1300.3	1819.14	1752.04	1321	1229.76	1292.68	1228.44
M153T361			0.116816	0.602505	0.00210712	152.985	360.757						802.387	803.934	572.197	664.046	902.703	914.953	711.686	392.292	407.769	401.405	493.489	401.163	612.128	595.704	594.604
M595T297			0.166545	1.62985	0.00210859	594.929	296.987						1009.92	1435.64	942.498	1472.36	678.461	1825.19	1834.35	2047.3	1774.96	2081.61	2288.02	1976.11	1296.67	1291.66	1100.3
M259T428			0.367763	2.69093	0.00210996	259.14	428.096						841.887	2929.02	3155.83	1826.26	889.682	804.698	4312.45	4762.74	2802.58	7093.2	4730.15	4412.09	3045.27	3112.94	3045.18
M377T162_1			0.671612	4.2536	0.00211058	377.219	162.273						553.585	3329.81	7278.63	5341.46	368.202	592.921	10222.4	21769.2	12936.9	8470.36	9799.24	11089.5	7206.25	7317.95	7317.98
M769T302			0.186072	1.44478	0.00211565	768.812	301.536						2408.51	2382.31	2348.18	1536.38	1394.92	2721.76	2909.83	3171.62	2857.24	3234.99	3004.84	3303.23	2576.25	2628.98	2629.54
M824T300_2			0.238589	0.622447	0.00212405	823.941	299.584						3685.41	4772.95	3425.76	3468.19	3601.1	2629.71	2510.58	2666.57	1669.09	1732.54	2447.51	2408.06	2741.85	3126.46	3130.05
M163T400			0.188633	0.759338	0.00213512	163.024	400.033						3415.11	2974.85	2718.15	2901.86	2961.48	3569.25	2420.8	2431.97	1886.85	2363.56	2789.85	2185.63	2768.09	2834.97	2768.37
M867T143			0.315457	0.238601	0.00214097	867.339	143.038						2195.72	3837.5	5557.09	2793.63	4067.67	1630.52	833.015	326.717	1774.74	701.228	775.953	379.953	2748.44	2698.31	3585.63
M483T47			0.382591	1.9237	0.0021426	483.438	46.6975						2993.29	3021.98	5170.66	4753.93	2342.29	3457.66	9712.27	6135.6	5351.74	5940.29	8266.68	6414.34	4088.64	4089.8	3782
M1200T177			0.306737	2.14344	0.0021517	1199.72	177.139						2151.1	576.501	1861.13	3426.45	1303.87	2762.15	5095.78	5083.68	2707.01	3851.66	4863.58	4293.66	3795.19	3947.62	3786.6
M631T178			0.401961	1.27404	0.00215434	631.48	177.74						16600.9	14317.9	16328.8	14694	15850.8	13968.9	16763.7	23133.2	19293.6	20054.2	17546.1	20117.1	14758.4	15171.3	15401.6
M453T211			0.288042	0.522181	0.00215818	453.072	211.462						3607.95	5622.89	3091.09	2965.97	3628.38	3638.74	1705.65	1648.68	1534.7	1753.26	2712.1	2423.42	3330.08	3352.89	3300.54
M434T434			0.111287	1.3577	0.00216067	434.152	433.933						762.306	823.005	950.194	671.255	656.245	806.99	1079.01	1296.88	979.605	1046.52	977.491	960.966	1144.95	1145.47	1121.33
M735T234			0.350769	1.92734	0.00216336	735.282	234.419						3438.93	2248.22	5261.82	1430.75	2560.41	2901.22	6162.89	6770.21	4766.29	6104.39	4207.78	6374.79	4752.85	5092.72	4736.93
M683T366			0.273522	0.44787	0.00216419	683.134	366.305						2732.89	2858.92	1847.87	4498.93	2900.33	2619.05	1295.55	947.936	897.007	1970.38	1583.87	1124.16	2133.2	2135.87	2133.21
M945T175			0.68173	4.04249	0.00216574	944.627	174.542						319.258	2349.33	13920.4	1490.33	87.0048	434.951	10985.4	10937.8	12968.6	12946	11783.8	15573.7	7457.48	8023.5	8023.73
M487T169			0.320793	0.262108	0.00217358	487.491	168.823						3245.14	4238.46	849.364	3406.37	3343.88	3255.02	309.266	182.544	1776.6	207.7	1596.83	733.656	1858.84	1859.75	1900.99
M888T82			0.650196	4.69537	0.00217853	888.427	81.819						730.484	4531.09	8246.18	696.201	399.199	192.927	5279.62	12918.3	9227.21	10108.2	17960.9	13978.8	7385.59	8223.56	8151.52
M97T422_2			1.08312	0.654792	0.00218047	96.9605	422.326						75050.4	80664.5	68857.9	105494	99693.3	92291.2	72821.9	45574.5	62919.5	58148.2	57900	44470.6	63167.6	65372.5	63130.4
M967T175			0.326404	3.20365	0.00218869	966.614	174.908						299.499	1013.06	3334.43	467.029	433.566	321.975	2192.46	3082.88	3026.43	3660.83	3404.11	3437.32	2221.05	2221.05	2328.92
M334T117			0.663305	1.84816	0.00218913	334.237	116.64						11248.6	10783.1	19697.8	4568.32	11213.7	14530	17534.4	19507.4	20603.4	23389.6	26049.1	26060.1	17523	17521.1	17363
M1184T63			1.44406	0.0431621	0.00218987	1183.53	63.075						92739.2	65454.1	90127.6	69332.4	26476.2	10568.4	364.215	264.568	2316.08	480.873	927.254	10956.5	30098.9	30012.9	30280.3
M531T490_1			0.138771	0.465989	0.00219195	531.118	489.565						1022.58	784.133	523.801	1000.77	1016.51	514.082	282.551	309.666	301.557	410.376	469.533	491.9	559.597	564.508	588.333
M127T428			0.298309	0.48492	0.00220224	127.003	428.103						3070.95	4415.08	2842.94	4614.7	4016.61	2721.28	1025.87	1280.31	1193.57	2986.88	2108.5	1918.7	2440.77	2440.92	2523.23
M377T110			0.459693	0.309781	0.00221855	377.052	109.594						5962.16	10171.2	10474.9	5062.34	4087.46	5173.47	1964.25	2505.7	1369.98	2127.29	2876.34	1836.25	6132.02	5450.58	6128.41
M674T262			0.313978	2.4725	0.00222847	674.323	261.538						2937.03	1238.26	2365.83	713.896	1191.06	1370.9	4680.19	2698.45	3283.04	4603.89	5816.65	3190.2	2823.86	2529.58	2504.04
M345T400			0.249595	2.80874	0.00223434	345.188	400.36						136.409	1473.72	1275.24	1119.66	92.7938	132.151	1996.81	2164.75	1752.01	2653.3	1462.33	1851.7	1359.48	1350.29	1359.56
M571T33			0.483288	2.34993	0.00223631	571.467	33.152						5626.99	3510.27	4683.92	4107.15	4642.27	8426.95	6441.71	14164.5	17587.6	13445.7	10505.2	10697.4	4144.26	4346.94	4145.29
M282T363			0.177915	1.49101	0.00224042	282.119	363.041						1724.97	1664.41	1593.73	1636.43	1557.73	1567.09	2160.77	2579.13	1781.51	3210.55	2440.56	2356.48	1386.25	1402.7	1386.41
M439T93			1.80004	0.157566	0.002241	439.159	93.139						124311	59053.5	38075.4	82947.2	149866	58301.2	11916.7	12663.9	14503.8	17256.5	13239.5	11180.7	45864.8	45888.5	48099.2
M205T289_1			0.286622	0.552273	0.00224251	205.052	288.774						4224.94	5352.41	3512.15	5774.51	3573.71	3167.64	3059.61	2366.37	1932.51	2062.96	2617.68	2102.03	3585.04	3683.01	3585.58
M970T130			0.542621	3.76792	0.00224284	970.499	129.68						732.334	1601.42	7726.48	1022.89	885.079	1320.03	4942.94	9770.39	5612.51	8797.89	9874.27	11070.9	7813.68	7819.46	8000.53
M393T154			0.495542	3.39624	0.00224621	393.273	153.937						589.512	2400.58	6911.19	1109.43	894.776	736.268	4177.4	8942.21	6202.75	7641.82	7051.22	8919.07	5585.15	5323.04	5331.01
M479T168_2			2.20918	2.20553	0.00224975	479.295	167.841						111507	53268.8	130875	10282.2	127238	114459	276465	220982	194120	198221	173807	144220	131919	142720	142728
M455T186			0.529923	0.443029	0.00225279	455.263	185.951						11332.2	8140.12	9910.52	5534.78	11765.1	13748.3	2945.76	2902.11	3270.39	4608.23	6641.45	6404.77	6672.64	7114.38	8177.76
M178T268			0.343733	1.76074	0.00226577	178.036	267.582						1929.05	3664.4	4079.73	4246.81	3704.82	3012.35	6497.71	7127.8	7876.49	4495.36	5408.99	4930.38	3899.77	3953.05	3954.39
M969T130			0.611486	3.32216	0.00226644	969.496	130.315						1022.89	4146.57	8517.46	3126.91	1745.99	1769.79	6569.72	12639.4	6995.9	11908.4	16732.2	12692.7	9245.75	9097.67	9097.94
M857T79			0.531983	0.485576	0.00227155	857.321	78.9995						13493.4	12450.6	14259.9	20954.4	15130.8	10030.5	6998.96	11163.7	8273.8	5368.48	6293.96	3815.85	12312.2	12087.2	12314.2
M235T325			0.117792	0.515632	0.00227269	235.323	325.044						745.418	378.839	525.477	505.988	736.263	684.307	357.246	363.651	127.71	364.901	318.195	312.345	472.089	493.716	471.456
M383T403			2.5994	0.195168	0.00227707	383.061	402.543						149726	262105	104100	303696	137635	114807	14229.7	16627.8	12334.6	68827.7	53017.6	44196.3	90611.4	91723.7	90613.1
M473T307			0.121139	0.494875	0.00227981	472.867	307.413						784.564	612.714	494.485	666.053	471.133	719.944	217.675	206.983	181.37	554.38	293.078	401.748	500.531	523.802	500.064
M210T109			0.549096	0.371663	0.00228438	210.121	108.738						12017.5	15431.2	6247.75	15051.2	8831.17	7218.04	3893.84	2285.09	5427.67	4591.03	3957.81	3927.19	8162.81	8416.25	8164.88
M236T244			0.220281	1.66418	0.00228688	236.078	244.371						1991.55	2381.01	2203.06	1146.16	1548.41	1209.51	2262.27	3172.56	2778.63	3409.54	2499.26	3317.86	2266.82	1651.11	2272.74
M313T164			0.833105	2.30675	0.00228781	312.899	164.013						4794.78	13235.1	24616.2	4569.05	10013.6	9925.94	33015.1	28967.1	24092.2	25264	18647.3	24923.2	19805.2	20379.4	20383.6
M1121T178			0.544611	3.90655	0.00228807	1120.66	177.665						1223.96	1453.35	7976.9	59.9589	1822.93	495.19	8497.45	5542.96	6154.72	8339.31	12001.4	10375.4	5917.66	5915.14	5788.25
M304T56			0.368059	0.729698	0.00229084	303.885	55.872						11325.5	12328.5	11010	10284.9	9440.93	13328.2	6671.17	7339.23	7699.98	8563.56	9584.03	9555.74	9575.91	9848.03	9569.09
M313T168_2			0.524202	4.05512	0.00229151	313.212	168.131						918.373	1874.28	6278.22	527.032	856.212	1342.95	6012.14	12606.7	4083.43	8774.71	8938.46	7423.01	4016.61	4076.09	4179.24
M496T294			0.384525	0.511469	0.00229898	496.06	293.91						7608.27	7555.68	3909.45	7989.49	6843.98	5405.21	4034.54	2713.86	1564.79	3330.1	4726.31	3737.31	5659.46	5595.89	5659.57
M1166T234			0.5311	4.64779	0.00230438	1165.57	234.047						983.469	166.349	2502.8	5376.99	809.27	882.819	8131.36	12421.1	2294.2	7287.23	10134.4	9563.91	4132.23	4131.63	4240.94
M334T307			0.260572	1.89896	0.00231137	334.141	307.229						1334.63	1932.77	2392.94	1473.17	1529.6	978.763	3104.07	4323.2	2823.58	3218.58	2199.99	2640.13	1939.2	1939.47	1954.38
M1017T300			0.165752	1.64284	0.00231184	1016.72	300.268						1117.98	846.006	1262.05	634.488	1011.02	1660.7	2206.5	1704.65	1751.11	1875.79	1616.63	1576.77	1059.27	1067.07	823.339
M403T155			1.53654	4.11199	0.00231669	403.258	155.189						2609.45	17102.2	60954.4	7519.81	3252.82	3708.87	37950.2	92876.2	59621.7	65592.2	55110.2	80095.7	42099.5	42799.8	42094.8
M397T178			0.964467	4.76542	0.00232125	397.269	177.656						138.875	7313.34	20329.1	4146.71	164.185	418.313	19721.3	30107.6	43283.4	21749.7	17913	22151.3	16603.5	16778.5	16780.8
M139T124			1.78854	0.304145	0.00235732	139.025	124.264						141490	65229.3	45583.5	65929.6	109064	122672	21304.9	27686.2	23284.8	22582.3	38603.2	33808.6	61360.2	61359.8	61690.6
M342T162			1.59714	4.25272	0.00236087	342.245	162.242						1448.57	43894.6	44223.1	5257.1	1520.97	2961.91	55506.3	119047	65489.3	66721.7	50608.4	64949	42190	42564.3	42187.2
M841T302			0.301527	1.3612	0.00236103	840.753	302.126						7097.71	6202.63	7094.93	3836.53	5809.78	6915.98	8227.3	9095.82	7628.09	8564.43	8155.97	8635.09	7005.79	7155.06	7158.67
M788T169			0.696428	1.79326	0.00236807	787.595	169.451						13775.4	11156	20270.1	13131.7	14943.2	10594.5	17898.1	25779.6	23912.5	28073.9	34175.1	20563.5	14514.9	14520	14884
M585T160			0.670762	3.48305	0.00237691	585.312	160.447						1719.2	3991.37	10909.3	3031.5	1964.33	593.296	10971.3	21119.5	11918.4	9363.42	12203.1	11779.3	9267.8	9477.48	9268.49
M503T154			0.833247	0.354631	0.0023815	503.247	153.921						35444	17690.7	10203.4	22935.7	25548.1	21938.1	4438.53	7341.95	6100.11	10093.7	8504.21	10956.9	7448.15	7478.02	6669.17
M1072T165			1.86213	3.29865	0.00240497	1071.62	165.36						34246.8	26660.1	78169.9	6112.03	27675.8	30167	104787	135740	52411.8	78269.2	160804	137717	79229.2	79239.1	79694.3
M302T436			0.504869	2.22827	0.00240498	302.146	436.429						2452.98	5668.39	8772.43	4466.09	2153.3	2388.67	10139.8	10567.9	6414.38	12139.1	8841.09	9614.12	6605.65	6746.75	6747.36
M372T376			0.416947	2.36857	0.00240748	372.224	375.824						1080.5	4985.76	4150.6	3575.66	1443.34	930.304	7362.34	4910.29	4779.61	7830.29	7629.54	5778.61	5609.47	4695.69	5531.16
M647T299			1.15992	1.45312	0.00241375	646.875	299.02						88484.4	72570.5	87476.2	43138.1	66480.7	91817.6	112252	116502	97089	113822	97511.5	116677	89128.9	90463.9	89257.9
M334T164			0.222864	0.368008	0.00242092	334.111	164.405						1758.82	1983.27	950.812	2387.34	2094.81	1877.09	338.286	1544.7	1066.72	499.93	260.775	356.856	931.126	949.599	983.008
M484T485			0.165841	1.72011	0.00242689	484.046	485.454						1236.57	722.6	1144.92	395.819	990.682	1114.66	1844.18	1251.64	1427.7	1563.74	1947.8	1606.57	1275.61	1262.53	1262.23
M436T168			0.385237	0.363407	0.00242994	436.485	168.43						6441.57	5779.38	2112.23	6971.36	3909.22	5583.75	859.392	1441.28	2983.06	1419.24	2762.31	1726.76	2958.68	2955.89	2533.01
M373T47			1.57489	0.352754	0.00243423	373.257	47.319						80231.6	117728	58507.4	131575	54327.9	61958.1	25826.8	33902	29117.2	25942.8	33331.1	29784	70141	71149.7	71149.5
M1024T333			0.208127	2.67953	0.00243473	1023.6	333.246						1174.97	798.796	1112.46	101.395	302.215	133.587	1779.93	1503.43	1081.86	1642.79	2228.58	1472.46	1097.2	1096.94	1053.52
M375T50			0.487617	0.394868	0.00245199	375.143	50.021						8581.34	14726.1	7855.55	8688.6	11633.9	7961.63	6282.99	4399.2	7067.55	2919.68	1453.19	1351.18	8364.17	8635.16	8639.57
M745T299			0.860614	1.48742	0.00245393	744.851	299.02						45383.9	34997.1	45664.6	20805.5	34363.6	47111.7	58778.3	60662.5	49321.5	59500.5	51126	60228.2	44590.9	45265	45299.2
M430T364			0.358185	2.82837	0.00245931	430.264	363.9						259.699	2975.35	2730.34	1856.5	451.77	278.051	3948.32	5126.15	3141.21	5008.81	4245.51	2717.39	3162.2	3063.62	3163.08
M214T125			0.545393	0.245794	0.00246291	214.374	124.904						12182.2	4532.23	3679.73	5971.4	9555.8	11071.1	1396.38	1973.19	1393.4	2051.2	2262.06	2474.22	4987.24	4973.34	4630.86
M658T305			0.125544	2.06485	0.0024648	657.789	304.728						583.806	121.516	526.54	139.696	362.056	502.009	858.629	688.932	584.335	967.382	722.142	794.808	483.863	540.459	539.29
M442T466			0.107368	1.33225	0.00246492	442.087	466.112						948.856	983.969	921.785	738.554	804.233	825.182	1193.97	939.592	1169.62	1051.75	1367.51	1235.34	935.869	958.69	987.336
M511T124			0.349385	0.332079	0.00250102	511.087	124.003						4354.9	3049.3	1873.03	2784.75	5612.13	4650.93	739.475	2099.86	688.649	1961.44	934.338	989.917	2708.78	2733.57	2708.77
M161T30			0.930445	0.151352	0.00250125	160.896	30.182						38574.8	32880.6	42109.3	29535.1	9760.59	10397.3	8188.13	3747.39	2227.15	3835.61	2974.12	3736.89	15743.9	15561	15936.2
M1020T299			0.22705	0.575004	0.0025067	1019.89	298.827						3299.65	3658.23	2367.39	2606.92	2220.26	2926.05	2348.27	1578.18	957.62	1285.86	1937.51	1712.78	2318.7	2433.18	2432.87
M576T38			1.61805	2.95966	0.00250835	576.196	38.219						1702.94	49983.1	49640.1	53979.2	4098.8	1440.63	60263.2	97465.7	84168.8	75319.3	100031	58797.5	48865.9	51931.1	51858.2
M966T448			0.347117	2.13892	0.00251027	965.521	447.611						1315.34	2237.65	4495.41	1574.68	2128.55	1835.01	3852.33	5028.39	4612.97	5855.49	6235.46	3476.05	2896.14	3062.17	3062.28
M302T55			0.379767	0.72001	0.00251257	301.887	55.364						9606.68	12574.1	11582	13180.6	9616.25	9943.87	7218.25	7380.36	6738	9143.36	8124.13	9279.12	9562.85	9873.35	9559.42
M218T325			0.227265	0.477556	0.00251494	218.045	325.021						2018.47	1539.22	1951.88	1441.66	3122.1	2785.67	1056.75	1043.11	1061.45	1199.45	895.777	884.353	1476.29	1509.89	1476.65
M547T391			0.187623	0.431549	0.00251714	547.117	390.859						1135.56	2186.58	1402.58	1904.21	2040.37	855.464	592.628	770.258	814.244	503.495	816.757	613.019	1260.54	1182.66	1181.56
M341T161			3.89858	9.09498	0.0025206	341.243	161.059						6048.08	30705	184690	8160.56	5961.95	11856.6	305912	752877	384088	285626	227817	293979	201494	196556	201369
M572T336			0.163102	0.538075	0.00252592	572.111	335.504						991.915	1779.66	1109.12	1378.59	1582	971.2	615.539	636.25	486.926	834.689	921.137	709.16	1023.33	1063.12	1025.02
M513T386			0.195989	2.90452	0.00254157	513.265	386.259						52.7498	756.769	1087.48	331.979	91.3544	38.4269	921.331	1295.31	1018.3	1156.43	1237.18	1222.51	988.364	988.767	969.653
M707T171_2			0.345745	0.403478	0.00254819	707.488	171.241						5071.74	7311.14	4113.84	4591.28	2896.1	4485.68	2301.68	985.115	2822.34	1644.18	735.043	2998.57	3585.46	3758.86	3758.24
M281T204			0.595705	0.248273	0.00255054	281.139	204.353						16369.6	16966.2	5872.17	10359.2	9273.08	6495.39	1017.15	2084.05	1179.78	4929.6	3576.97	3433.53	6919.58	6987.85	6864.6
M839T298			0.198439	0.336845	0.00256124	839.046	298.366						1879.55	1898.35	1137.21	679.801	1071.47	1482.99	219.24	203.595	809.687	259.266	718.734	534.557	1224.23	1219.73	1163.05
M856T38			0.658726	0.311245	0.00256143	855.555	37.557						12095.6	22064.7	12478.8	4615.1	15897.6	16171.4	2480.93	3804.34	4817.8	4840.93	4810.25	5179.71	12149.3	12511.6	12212.4
M467T58			0.561309	1.53374	0.00257501	467.062	57.89						11294.6	15851.2	15517.9	11446.3	9243.76	9117.18	19172.1	19967.8	15031.9	17002.9	22565.5	17411.4	16705.7	17117.9	16701.7
M383T182			0.743326	3.54926	0.00257712	383.253	181.946						1261.26	4735.95	15532.3	2254.07	1968.15	1795.85	9975.83	14429.2	15274.1	18694.8	15556.6	23843	11221.2	11823.8	11645.3
M167T28			0.740969	2.21386	0.00258702	167.034	27.636						5156.4	18135.7	16864.6	7302.6	3324.85	4116.92	19177	18294.8	21613.1	18861.6	22436.5	21160.4	14813.4	14263.4	14813.6
M323T69			0.562516	0.29592	0.0025926	323.042	68.893						11323.6	5420.26	4931.01	14376.3	10515.3	9598.78	949.077	1040.79	1679.92	3599.21	5448.04	3903.34	7643.54	7463	7643.29
M718T184_1			1.36189	3.17256	0.00261772	717.89	183.772						11976.7	3271.18	41630.1	39189.4	8731.65	7854.79	76198.2	60171.6	35180.3	45051	84447.9	56352	40052.1	42971	42990.5
M1178T180			0.38745	1.99998	0.00262961	1177.66	179.725						4244.65	2534.06	5842.72	205.616	4052.73	2796.58	7175.33	6746.58	5958.66	6492.13	7299.01	5680.56	5821.04	5744.7	5862.61
M559T62			0.76159	0.308014	0.00264823	559.233	62.468						23346.7	26341.7	27393.4	25842.5	12785.5	8730.61	1024.45	9019.36	6393.83	9930.3	2256.36	9705.05	16428.3	16441.9	17224.8
M416T448			0.312744	2.31842	0.00264877	416.213	448.26						1243.43	2025.65	2111.83	1861.22	1439.44	1137.73	3730.18	6272.88	2858.25	3679.21	3235.42	2989.35	2362.33	2596.36	2594.76
M374T184			0.87763	6.90371	0.00265454	374.207	184.332						477.039	6569.41	6996.55	3859.89	462.117	220.899	14757.3	20763.4	14511.3	40307.6	11037.4	26934.7	8785.74	10214.9	8824.55
M1070T167			1.55514	3.02727	0.00266111	1069.6	167.268						32800.9	11317.4	61430.6	921.123	26129	26296	80742.6	95261.6	46772.8	54204.1	115813	88224	66528.4	66588.4	67681.6
M398T291			0.316544	0.513758	0.00266299	398.084	291.438						5179.78	5082.69	3120.3	6022.25	4170.01	3557.83	2516.6	1820.6	1086.37	2396.83	3445.91	2673.42	3616.97	3614.57	3430.92
M1045T299			0.17404	1.7112	0.00266345	1044.77	299.217						1280.94	637.092	1194.9	624.328	1177.35	1739.88	1765.09	2070.48	1490.32	1876.3	2085.4	2099.53	1472.59	1474.27	1532.86
M373T438			0.219865	2.49068	0.00267207	373.182	438.323						440.645	1268.68	988.484	762.37	448.514	444.837	1587.12	2150.43	2814.54	1551.64	1329.84	1409.7	914.492	920.908	914.46
M301T172			0.3004	0.419186	0.00267301	301.073	171.926						3827.28	4301.39	3673.14	4613.92	1815.79	3313.52	1158.85	738.701	902.795	1694.44	3041.49	1495.11	2283.58	2934.62	2914.08
M103T153			0.459536	0.326659	0.00267944	103.04	152.633						5286.13	4462.64	6426.19	5777.06	11460.8	9116.35	3034.44	1103.24	1426.87	2637.35	4357.02	1333.6	4432.52	4182.91	4429.19
M233T28			25.7891	3.34515	0.00268232	233.013	28.182						986920	1.63451e+07	1.47857e+07	1.041e+06	1.14091e+06	1.1655e+06	1.43998e+07	2.365e+07	2.45989e+07	1.56169e+07	2.11199e+07	1.92505e+07	1.23146e+07	1.22932e+07	1.21358e+07
M575T179			0.770309	2.546	0.00268947	574.518	179.386						11592.2	8062.36	17475.1	2534.92	4401.89	8786.01	22234.7	22839.9	12410.4	19996.3	32511.1	24570	23286.7	23198.6	22340.6
M392T299			0.410511	0.432305	0.00270383	392.095	298.619						6353.12	10767.4	5118.74	6870.55	4697.76	5771.9	3131.06	3018.47	1837.77	2217.66	4011.66	2893.79	4839.11	4965.63	4838.81
M1103T143			0.376908	0.245949	0.00270954	1102.58	142.996						2179.74	6094.43	1790.23	5035.79	5193.35	4155.34	161.639	737.849	635.271	2188.46	561.901	1728.06	3223.13	3152.67	3222.49
M1023T226			0.149565	0.519931	0.00271554	1023.27	226.207						1022.64	1080.56	798.013	1330.39	778.659	953.334	267.557	651.243	307.884	725.513	408.21	740.248	780.686	785.366	764.973
M531T307			0.154452	1.18504	0.00271709	530.79	307.228						3309.46	2917.71	3085.96	2374.55	3057.76	3082.9	3450.11	3685.17	3472.99	3540.86	3352.57	3625.7	3147.3	3147.1	3235.5
M420T175			0.670256	3.02686	0.00271767	419.952	174.752						97.325	1691.82	13186.8	3927.52	9607.72	345.754	10588.2	16663.5	13564.7	16945.1	12597.4	16986.9	9681.4	9562.55	5989.39
M367T441			0.22325	0.517651	0.00271929	367.003	440.713						2306.21	1701.82	1952.99	1752.8	2187.06	3061.68	846.372	797.403	840.507	1866.37	1107.62	1251.81	1940.88	1846.2	1943.23
M765T374			0.212478	3.04998	0.00272853	765.378	374.382						171.575	854.892	1201.1	426.243	223.082	216.357	1325.35	819.571	2271.51	1545.29	1524.54	1948.06	1417.06	1506.8	1418.7
M440T94			0.966246	0.188301	0.00273178	440.162	94.2475						35906.8	12479.5	14118.7	27595.9	42813.9	18899.2	2488.51	3205.01	4619.69	2875.69	3965.38	11432.5	19161.4	19162.4	19518.3
M747T168			0.587113	0.24021	0.0027353	747.213	167.862						7206.71	16406.8	9596.89	16721.7	10166.6	4611.7	4062.28	2189.49	1930.57	4535.46	1019.37	1806.96	7263.26	7626.31	7268.33
M478T406_1			0.186023	2.78973	0.0027568	477.757	405.872						471.793	407.98	921.928	278.568	220.744	274.27	941.879	1796.3	1409.33	1371.03	970.906	694.887	866.126	883.629	866.326
M669T209			0.249519	0.55944	0.00275812	669.255	208.85						3769.41	2135.22	2013.14	2629.19	3085.95	3298.79	1305.33	1581.41	1063.68	1893.16	1622.33	2006.37	2256.98	2183.89	2188.86
M977T299			0.170886	1.38278	0.0027616	976.771	299.191						2100.55	1792.56	2277.49	1268.24	1685.19	2333.39	2715.03	2740.96	2435.45	2482.36	2506.89	2962.44	2333.51	2292.83	2292.64
M289T219			0.124862	1.57968	0.00276535	288.985	218.519						881.213	495.518	809.1	540.649	610.155	686.798	1297.82	939.373	776.07	1041.33	1214.67	1086.46	899.896	871.538	871.435
M428T170			0.247322	2.58896	0.00276839	428.317	170.234						521.528	959.938	1543.71	865.185	259.75	1098.36	1676.11	3324.2	2991.21	1630.66	2270.46	1695.42	1255.34	1348.56	1349.9
M989T135			0.242736	0.686209	0.00277637	988.577	134.737						5397.25	5239.15	4692.61	4903.67	5712.05	4800.24	2352.07	3121.18	5154.82	3361.03	3534.72	3573.66	4469.84	4469.85	4487.62
M626T299			0.260591	0.574957	0.00278439	626.004	299.008						3516.4	5079.43	2749.64	3682.81	2717.92	3620.76	2319.86	2101.12	1490.37	1654.73	2380.84	2338.17	3121.63	3121.23	3074.16
M803T182			0.481851	2.64803	0.00278658	803.49	182.494						1317.71	6526.86	5493.48	1606.55	1321.68	2498.42	6523.7	10495.7	5386.21	11160.6	7711.33	8411.82	4805.61	4914.78	4915.42
M468T153			3.71839	3.17508	0.00279086	468.269	153.283						42042.3	141621	439012	53570.7	40186.1	49032.9	291646	426970	347135	438671	443667	482327	299007	301398	299001
M177T230			0.224095	0.585088	0.00279643	177.057	229.746						3418.47	3710.87	3823.26	2784.72	2375.54	2385.21	2504.3	1906.42	1410.27	1268.2	2076.49	1657.35	2714.27	2775.79	2715.44
M163T245			0.325629	0.333544	0.0028075	163.06	245.415						2483.06	4171.93	2061.64	5690.71	2894.43	2945.44	874.903	743.753	663.047	1311.39	1522.56	1637.68	2775.18	2995.6	2797.7
M569T235			0.497409	3.34972	0.00282402	569.271	235.357						3001.42	1309.94	5490.98	811.82	2008.81	2131.48	8469.47	8605.5	2930.21	7427.89	12842.6	9147.64	4308.13	3322.89	3317.21
M90T168			0.219883	0.476243	0.00282751	89.9691	168.085						3627.42	2601.26	2322.98	2066.95	1805.29	1792.74	1423.68	677.326	1561.65	766.49	1160.41	1181.02	1936.69	1935.87	2009.84
M872T134			0.396877	0.416823	0.00282921	871.588	133.782						3558.66	9512.22	8065.23	8050.31	9554.28	5713.07	4652.24	4181.68	2468.46	2394.06	1128.25	3704.65	4605.38	5383.15	5369.23
M553T79			1.28407	0.255693	0.00284	553.424	78.717						18720	67192.1	75523.6	59599.5	38932.2	35373.4	5971.75	9299.67	5232.24	17143.3	13809.1	24060.6	31901.2	31917.2	35198.2
M793T368			0.240379	4.01018	0.00284013	793.456	367.889						32.3995	1095.75	827.011	461.122	37.2594	47.3805	1633.99	2708.25	939.042	1969.33	1657.95	1120.6	910.251	910.439	890.451
M565T179			0.566796	2.5206	0.00286102	565.327	178.755						5395.57	4093.61	8820.81	1727.86	5101.43	4613.62	12444.4	10547.5	6604.74	13220	12954.6	19223.9	6247.92	5732.7	5536.33
M729T300			0.194208	1.34832	0.00286208	728.877	299.532						3072.1	2793.31	3020.12	1697.57	2483.22	3219.75	3533.06	3951.85	3401.74	3706.73	3719.83	3645.65	3033.88	3081.56	3081.6
M85T136			0.452282	0.49306	0.00289549	85.0292	136.065						6040.02	12016.3	13129.6	11643.3	6985.99	8718.75	6051.26	3205	4708.24	4156.68	5606.76	5132.81	6515.36	6417.71	6418.79
M423T130			1.112	0.207977	0.00290024	423.159	130.227						11945	45328.5	27298.2	57314.9	27032.8	39589.7	2535	1395	1641.79	15899.7	8233.05	13660.5	31729	31725.7	30715.2
M767T103			3.72007	4.06188	0.00290402	767.256	103.098						16940.9	348587	191147	24641.9	17041.6	7831.74	384416	237592	460429	323760	631285	424791	263001	262560	118560
M757T303			0.156848	1.95137	0.00290899	756.763	303.455						811.035	461.055	867.091	35.0042	716.919	906.496	1415.53	938.309	1206.25	1280.64	1401.45	1168.33	779.609	748.555	750.191
M941T453_2			0.166755	2.78672	0.00291295	941.477	452.681						63.4297	637.253	747.535	210.838	125.662	95.3148	834.437	894.926	714.98	881.117	1206.64	707.033	602.617	600.978	602.617
M337T286			0.389943	0.498781	0.00293863	337.091	286.144						5106.32	5471.76	6929.69	6977.16	7811.89	5398.06	847.877	2454.59	2008.98	3713.11	4856.67	4920.24	4463.27	5666.32	5669.53
M588T298			0.352435	0.41797	0.00294434	588.048	298.378						4346.94	7561.77	3494.68	5765.01	3339.23	3841.69	2292.03	2252.45	1189.21	1407.81	2344.88	2362.79	3509.81	3509.24	3461.98
M208T210			0.200709	0.574022	0.00295076	208.027	210.162						2244.23	1738.71	2449.61	2203.09	2582.64	2379.62	1317.46	1523.48	1170.61	1695.23	1776.71	322.012	1863.34	1891.99	1892.73
M458T293			0.427074	0.42673	0.00295119	458.104	293.286						7694.3	8635.52	3762.66	10072.5	6807.52	4948.67	3661.3	2437.32	1502.92	2856.24	4069.13	3362.11	5369.53	5423.2	5425.65
M173T364			0.290797	0.625757	0.00297052	173.045	364.452						4227.69	6064.4	3878.75	5316.82	4395.21	3957.23	2249.82	2402.18	2272.69	3677.86	3369.64	3448.96	3612.63	3639.28	3612.83
M581T158_1			0.504267	0.208861	0.00297515	581.16	157.641						5058.92	11125.1	2621.54	10566.1	10193.8	4808.43	2057.96	1193.26	1630.99	1575.74	928.681	1881.35	5164.95	4959.14	4963.29
M399T177			1.41996	3.89752	0.0029962	399.285	176.793						1809.77	17298.2	59354.5	7426.4	572.566	2064.89	35468.5	64635.6	73894.9	56085.4	46700	68248.1	36379.3	37108.1	37111.9
M624T229			0.212261	0.675481	0.00299834	624.242	228.96						2955.04	3432.82	2692.9	3591.78	3355.05	2671.35	1896.8	1547.77	1902.66	1954.7	2977.19	2351.65	2388	2319.15	2319.92
M291T104			0.474759	0.433708	0.00300585	291.052	103.83						8998.54	13080.5	7779.84	11391.6	12579.9	4412.19	2524.79	4053.67	3748.85	4567.83	5362.06	5003.1	6330.41	6343.96	6386.98
M207T110			0.548453	0.501333	0.00300894	207.101	109.858						12387.1	14868.2	9689.88	14292.2	10617.5	15462.9	4297.49	6336.17	3259.52	12044.8	4466.06	8357.92	8772.2	9446.95	9454.15
M476T333			0.360551	4.26884	0.00301079	476.197	333.244						276.453	1164.39	1611.87	1624.56	456.222	406.245	5242.35	6292.83	1194.58	3268.79	4490.73	3158.98	1898.71	1853.86	1900.31
M470T47			1.15146	2.02082	0.00302785	470.229	46.6935						26732.1	30984	50109	16513.9	29514.4	24583.5	34285.1	81353.6	58888.9	55050.8	65251.4	65759.3	52744.8	52696	54516.8
M321T385			0.167451	0.63809	0.00303261	321.077	385.42						2029.29	1619.46	1236.06	2131.06	2088.7	1581.66	1294.14	1075.97	1183	822.855	1079.01	1363.81	779.452	683.757	681.295
M943T182			0.393545	3.01304	0.00303851	943.469	182.309						1782.54	1597.42	4593.53	1071.41	1105.55	430.24	6068.97	4728.84	2181.71	6864.79	5691.34	6344.34	4599.8	4599.72	4350.95
M694T294			0.139482	0.588855	0.0030407	694.016	294.421						1298.41	1184.93	672.477	1120.79	1157.01	812.61	649.032	622.53	392.186	600.2	678.871	735.309	886.508	927.802	888.315
M370T249			0.203323	0.666877	0.00304431	370.109	249.152						2271.44	2491.32	3013.54	3245.75	3697.2	3476.5	2167.65	1781.82	1536.53	2371.76	2208.53	2068.02	1892.09	2201.08	2223.25
M308T291_2			0.482297	0.583255	0.00305046	308.097	290.691						13921.7	15058.9	12727.5	14379.8	9027.59	16269.1	10255.2	8495.13	4759.91	5904.43	11230.6	6822.71	8627.85	9314.15	8621.72
M379T163			0.462968	3.0629	0.00305987	379.216	162.615						565.839	4416.33	5111.59	1532.38	667.336	488.577	5208.32	10089	6309.42	6221.26	5082.88	6239.23	5212.92	4993.26	4999.14
M880T154			0.425413	3.13729	0.00307168	879.516	153.746						659.879	856.163	3842.62	4051.74	508.863	1222.22	3464.64	7973.43	3813.68	5867.45	6082.62	7752.25	3433.15	3387.98	3433.31
M682T292			0.185707	2.79834	0.00307707	682.268	291.553						555.69	500.064	989.941	85.8282	151.984	369.545	1155.53	1561.08	649.248	1223.86	1095.17	1739.25	741.816	735.162	750.58
M455T428			0.210857	2.75388	0.0030882	455.26	428.274						191.101	751.705	1339.24	295.834	372.814	240.931	1146.46	1336.73	1165.3	1972.9	1947.16	1220.81	1059.97	1063.11	1143.76
M582T165			0.554667	3.04027	0.00309052	582.319	164.909						4872.32	1794.3	1896.72	1918.34	6780.13	5834.27	8391.06	17746	5836.06	11728.8	10888.6	15627.8	9658.36	9222.79	10289.4
M251T440			0.196706	0.511123	0.00309375	250.985	440.47						1759.7	1331.48	974.609	1593.52	1997.21	1882.13	572.742	545.807	662.237	1371.26	777.131	946.239	1236.66	1239.59	1278.53
M366T287_1			0.438281	0.603413	0.00309809	366.107	287.171						12596.7	12460.5	8247.62	14395.3	9133.42	10159.4	8827.94	6769.76	4675.61	6212.22	8068.04	5870.85	10180.8	10170.1	9624.51
M159T461			0.448066	0.485355	0.00310355	158.993	460.506						9705.39	8370.8	4801.95	10567.4	7874.75	7761.47	2967.77	2666.16	2737.4	7357.75	3930.31	4162.68	5970.82	6127.09	6120.95
M364T380			0.297111	0.356756	0.00310508	364.048	380.316						2403.16	4557.52	1896.19	4044.55	1887.01	2718.57	723.165	624.803	842.471	1369.54	1142.32	1543.43	1872.45	1902.89	1902.64
M711T417			0.179922	0.507923	0.0031197	711.171	417.142						936.717	1730.12	1443.05	2024.8	2377.28	1685.64	744.863	1107.38	797.269	658.718	1106.48	764.884	1118.91	1119.71	1141.01
M651T368			0.305789	0.386714	0.00313043	651.118	368.064						2717.97	3866.58	2199.27	5792.71	4196.52	2449.31	1605.58	1295.74	1155.51	1577.06	1345.91	1227.18	2372.74	2431.78	2431.79
M243T70			1.00627	2.74416	0.0031367	243.196	69.5385						23465.8	11861	23648.3	5045.9	9423.26	10090.9	32231.4	60531.7	21648.7	41779.5	41723.1	31319.7	37189.1	35613.3	35599.5
M671T302			0.172241	1.26813	0.00315069	670.835	301.54						3187.59	2451.77	3263.36	2258.06	2774.71	3351.29	3403.75	3809.2	3661.58	3892.38	3587.09	3567.87	2988.09	2989	3080.19
M710T170			0.580738	0.58655	0.00315209	709.504	170.424						20123.4	26590.2	18448.1	15488.6	13998.5	21053.6	12446.8	8754.32	11864.9	9166.81	10539.6	15092.8	15500.7	15499.3	15423.1
M1164T233			0.267786	2.97915	0.00315325	1164.48	233.371						431.667	35.2322	869.102	1915.79	968.041	1145.65	3244.52	3724.17	1010.84	2627.86	2832.44	2544.75	1745.9	1787.82	1746.03
M485T34			3.20499	0.150408	0.00316759	485.11	34.27						204369	559157	197970	288112	293927	136861	27304.9	24395.4	28350.4	79722.9	26754.3	66216.9	151686	162144	151909
M446T55			0.962002	5.48269	0.00316799	446.118	54.873						1322.57	4538.36	14153.4	3053.96	1524.62	834.186	37838.1	24240.9	30209.6	5202.63	20091.1	21826.6	7724.26	4479.13	4510.78
M171T34			0.479851	0.430116	0.00316981	171.011	33.834						5733.95	12988.5	7731.79	8458.71	12093.5	14662.6	4220.02	5376.1	6510.83	3240.04	4196.43	2981.39	10343.5	9561.15	9566.24
M887T419			0.126537	1.68839	0.0031766	887.115	419.491						446.431	340.375	716.823	706.316	447.412	654.947	1080.47	949.841	801.784	650.629	1138.94	970.8	623.136	623.338	663.747
M1105T180			0.196125	2.07934	0.00317663	1104.72	180.072						871.099	475.995	1369.76	53.731	1095.47	1459.34	1965.9	1539.27	2286.22	1659.81	1662.86	1959.27	1338.32	1171.27	1315.15
M1194T178			0.952812	2.18874	0.00319449	1193.68	177.74						23091.9	7152.15	30089.3	1042.4	21295.2	22002.4	38361.5	42598.9	25842.2	33740.3	44852.7	43707.4	34459	34451.6	34053.5
M468T58			0.362887	1.96934	0.00319682	468.065	57.844						3723.2	5722.72	3352.69	1262.56	2277.24	2211.93	6426.48	6379.93	4817.21	5490.14	7940.88	5477.29	5271.05	5080.38	5083.6
M382T287_1			0.183006	0.48814	0.00320785	382.11	287.289						1228.61	1907.82	1074.26	2050.32	1403.43	1104.94	859.787	458.478	443.384	936.164	914.973	667.894	1247.09	1303.54	1249.04
M282T76			1.31798	0.34966	0.00321052	282.03	75.8025						82973.9	54993.7	31847.9	75779	34261.9	70771.7	7128.58	18427.5	11148.4	36598.3	24165	25132.9	48262.4	44431.3	44527.9
M221T308			0.553927	0.371285	0.00321403	220.949	307.552						12719.7	12955.8	6607.34	16450.8	8054.27	7410.57	3159.02	2670.48	1845.15	6380.22	4425.17	5355.89	7025.78	7152.96	7023.25
M249T59			1.56504	2.69811	0.00321888	249.185	58.6385						21255.9	41132.8	63124.1	17129	23902	24906	82234.7	110055	45702.8	80375.2	129509	68675.5	63972.3	63834.9	61559.5
M360T289			2.56741	0.386652	0.003224	360.129	288.609						285918	267826	113862	325765	232583	174284	103236	53703.6	25455	88191.9	162536	108283	167032	171984	167018
M143T370			0.292545	0.450175	0.00322429	142.998	369.761						3755.12	2758.55	1820.36	3924.28	4143.72	2810.48	944.016	1000.71	929.067	2443.47	1166.49	2165.24	2738.48	2399.2	2737.56
M979T423			0.096167	0.664228	0.00322586	979.002	422.555						612.006	499.192	557.398	432.773	732.955	668.147	349.182	301.538	401.378	417.141	471.798	385.401	468.166	468.172	464.431
M298T112_1			3.08624	0.245429	0.00322778	297.537	112.038						392298	298071	134180	465768	168893	225433	15907.7	66374.7	33748.3	109178	96654.8	91596.5	189031	189615	207089
M254T332			0.212894	0.660016	0.00322795	254.051	331.84						2303.38	3428.36	3557.77	3101.73	2885.69	2397.7	1849.26	1760.36	1461.91	2566.47	1934.67	2092.86	2162.51	2262.15	2263.74
M62T34			2.82611	2.12161	0.0032366	61.9885	34.389						353964	101115	136142	75287.3	106742	323040	404463	400652	447337	310465	382475	380503	252718	262652	252758
M239T335			0.327172	0.512237	0.00323722	239.092	334.522						3866	6607.1	3837.21	5635.1	3808.84	4148.6	2190.69	1847.54	1343.38	3369.73	2168.35	3373.2	3376.33	3409.99	3410.96
M211T228			0.252062	0.4839	0.00323723	211.082	227.829						1771.53	3589.22	3995.81	4271.61	4013	2226.53	1985.42	1458.02	1233.12	1712.6	1387.29	1837.53	2581.19	2734.55	2581.49
M177T308			0.2051	0.398246	0.00323733	176.959	307.552						1556.4	1660.98	1069.53	1940.66	2679.93	1203.28	316.784	354.493	977.095	951.359	741.244	685.609	1001.78	1001.92	1016.16
M1172T178			0.467381	2.32904	0.00325081	1171.69	177.806						4599.81	1795.15	6516.52	380.037	4767.83	5020.59	8487.11	9779.27	4890.73	8475.35	10593.7	11527.8	8777.97	8785.97	8776.56
M981T301			0.181464	2.22006	0.00325186	981.236	301.314						837.797	184.551	1134.07	41.9663	588.065	1285.97	1422.74	1445.5	1452.77	1418.33	1462.39	1839.26	774.034	774.372	738.901
M367T422			0.135367	0.548089	0.00326212	366.94	421.726						839.113	1142.72	764.631	1366.74	1371.96	950.01	875.989	453.278	681.393	484.583	543.011	488.792	804.401	807.76	792.155
M481T381			0.12632	0.665142	0.00326438	481.115	380.844						1114.54	1161.38	1477.11	955.344	907.131	1075.7	783.53	900.04	661.993	536.665	758.18	810.199	861.391	849.193	861.498
M518T229_1			0.215606	2.04492	0.00329226	517.623	229.422						787.839	299.11	1588.02	1612.56	1097.06	1089.75	2717.58	1918.97	1334.48	2295.74	2695.21	2277.53	1459.26	1459.98	1532.96
M447T141			2.84932	0.252729	0.00329325	447.221	140.549						188388	356802	146840	320852	244974	147183	15459	20854.2	5510.34	45405.1	84503.5	183362	158086	157932	135878
M1125T424			0.125222	1.5578	0.00331454	1125.15	424.256						886.058	689.137	904.065	502.773	471.087	650.792	1161.89	998.939	814.821	987.692	1244.67	1185.08	979.001	978.791	876.864
M493T162			0.282465	0.513948	0.00333339	493.297	161.858						3773.5	3021.99	4035.32	3009.51	4382.43	2813.48	797.018	2015.77	773.804	2295.4	3027.07	1902.47	4659.58	4659.33	4775.3
M1051T302			0.13986	2.30536	0.0033465	1050.69	301.852						288.174	360.344	578.618	88.229	337.871	477.969	829.971	1067.96	929.298	755.992	369.958	960.005	546.208	509.668	497.733
M529T397			0.303814	3.32681	0.00335875	529.272	396.84						396.23	1707.62	1491.63	1274.27	383.596	168.126	3610.53	4551.55	1201.99	3121.48	2163.76	3386.88	1781.49	1822.52	1780.16
M471T346			0.229249	2.91542	0.00336401	471.291	345.916						209.259	928.639	1429.14	590.745	129.767	203.472	1769.06	2090.98	901.96	2073.25	2052.81	1289.75	1521.61	1515.85	1611.38
M271T53			2.3965	2.01984	0.00337013	271.227	52.605						124633	125841	204107	58596.7	150682	81536.5	169305	321306	177388	264500	282476	290600	186528	189373	189373
M236T28			1.33677	2.59153	0.00337419	236.011	28.2975						9522.41	51650.8	50081.8	7183.09	11282.6	8510.74	48317.1	67514	67562.5	47922.7	65848	61066.9	40776.2	41801.4	41830.7
M230T192			0.417583	1.48193	0.00339158	229.998	191.599						5962.46	9149.61	10150.2	6942.42	5943.49	6560.54	11617	13488.4	10198.1	9657.08	9755.87	11538.6	8487.12	8820.35	8488.71
M421T175_1			0.357793	2.52914	0.00339404	420.949	174.816						4540.35	1791.39	1495.19	1049.05	4540.35	146.808	3308.78	6017.48	6032.83	6301.89	6776.11	5865.94	4158.59	4405.38	4151.21
M96T125			0.683021	0.38307	0.00339552	96.0199	124.875						23676.4	10131.1	10119.9	10640.2	16811.3	20243.2	4186.68	6046.19	5010.85	4817.24	8044.35	6992.34	11968.5	11968.8	11775.3
M236T29			0.602264	0.463407	0.00341027	236.095	29.4055						22471	21279.8	12947.1	10931.8	10784.1	16101.8	6553.92	9879.38	7887.07	8451.49	6029.1	4998.27	19219.7	19220	19420.1
M459T399			0.32455	2.60702	0.00341535	459.257	398.748						262.075	2919.26	2560.1	1596.86	412.068	211.352	3497.09	3713.74	2807.52	4428.75	3615.43	2693.84	2572.46	2573.2	2436.39
M871T103			1.65708	4.49246	0.00343874	871.267	102.52						2602.53	55886.6	42820.4	3529.14	2865.01	4157.22	31783.8	122260	120749	67199.4	81452.3	79086.3	79895.6	76032	79854.6
M528T299			0.265998	0.53026	0.00345781	528.027	298.996						3340.33	4953.25	2619.15	3950.3	2383.41	3018.12	2129.85	1524.06	1191.54	1768.71	2149.36	1981.96	2852.64	2839.63	2852.51
M1085T300			0.171492	1.35137	0.00347151	1084.7	300.246						2226.64	2680.88	2115.35	1565.88	2306.92	2677.8	2628.58	3461.17	3160.32	2947.32	3276.57	2868.78	2685.89	2870.47	2692.78
M637T268			0.362028	0.553862	0.00350794	637.139	267.552						7329.79	4778.13	3558.12	7030.35	6150.78	7911.18	3793.3	3208.95	2442.65	4137.02	3522.52	3254.63	4648.97	4670.8	4637.8
M607T333			0.217125	0.535299	0.00352387	607.164	332.557						1779.34	2017.5	1609.85	2289.43	3040.63	2054.03	848.478	890.96	659.382	1661.85	1415.37	1370.85	1520.5	1527.33	1527.36
M275T212			0.32239	0.303962	0.00352577	275.185	211.84						4632.89	1443.86	2796.91	1508.99	3732.44	3988.59	813.091	938.022	614.96	721.683	1315.29	1099.78	2200.12	2200.33	2040.36
M974T421			0.181812	2.99356	0.00352604	974.431	420.871						126.213	914.86	440.882	448.915	118.918	126.73	1196.29	1486.99	583.878	1219.58	1286.32	742.474	685.133	646.257	602.877
M571T169			0.330418	0.314773	0.00353968	570.99	169.032						3535.59	5206.23	1409.06	4562.25	2534.92	4132.25	123.289	1676.62	1805.14	773.487	1819.48	531.914	1773.98	1641.02	1773.56
M707T184_2			0.317515	1.83863	0.00355237	707.399	183.772						1996.95	2766.75	4104.88	2279.84	3153.6	997.578	4935.79	5081.52	3776.62	3400.92	5571.24	5364.17	4628.42	4453.95	4469.71
M923T300			0.170574	0.669462	0.003558	922.924	299.645						1966.37	2343.95	2330.34	1849.11	1630.53	1915.21	1332.94	1581.76	713.54	1379.15	1567.95	1481.99	1950.74	1978.36	1950.79
M303T126			0.443053	0.323897	0.00355957	303.056	126.147						8290.81	8922.77	6206.91	9216.73	10792.3	2308.31	653.526	1010.07	3504.32	1962.18	4021.1	3663.14	5828.4	4965.32	5840.83
M489T103			1.58648	3.62311	0.0035687	489.149	102.626						16695.6	56863.1	41640.2	2274.43	13323.3	11607.6	34641.1	124938	123167	68780.7	76317.2	88102.4	95736.8	95244.5	95860.1
M946T174			0.477525	3.68295	0.00357631	945.633	174.362						97.2091	1775.65	6750.9	1322.67	187.404	202.097	3890.1	7766.32	4952.14	7319.57	7027.53	7111.03	4861.2	5121.42	5132.7
M631T244			0.47882	0.274045	0.00360187	631.223	244.067						5976.82	11188.9	5433.41	11387	5607.03	3399.68	1890.9	1612.93	1270.19	1642.95	2813.68	2551.33	4875.98	5073.75	5075.02
M521T196			0.805527	0.313043	0.0036065	521.339	196.132						30974.8	14904.9	12826	11220	29439.9	18806.9	6263.57	5966.23	3052.38	6442.59	9282.63	5985.66	10464.3	10451.5	9924.58
M149T288			2.1149	0.277673	0.00361029	149.045	287.549						92696.6	188761	98234.8	244503	115155	89386.9	41130.5	30590.2	23266.9	40930.4	50385.1	43814.8	83129.5	83100.2	81965.3
M695T391			0.170476	2.70476	0.0036179	695.34	390.507						113.803	869.707	411.023	515.694	126.787	227.73	757.633	890.96	768.481	1222.15	956.772	1529.58	711.482	661.774	708.874
M545T200			0.232396	0.577698	0.00362962	545.129	200.381						2719.67	3088.14	1774.43	3372.98	3877.45	2453.9	1685.17	1851.7	1239.24	1806.06	1990.06	1414.19	2191.95	2182.92	2206.66
M307T282			0.5013	0.302816	0.00364488	307.139	282.133						6474.03	10243.6	5192.64	12930.1	6082.09	5145.64	1316.18	1195.42	802.076	3480.46	3052.43	4103.59	4943.7	5040.56	5040.39
M232T28			1.102	2.75799	0.00364976	232.288	28.3565						5896.74	36052.5	30972.7	4889.26	4400.78	7698.1	26548.7	51083.3	49172.6	36660.9	39461.5	45043.8	30850.3	31215.4	31212.8
M361T425			0.199475	0.40404	0.00365093	361.016	424.876						1751.49	1847.83	1577.28	1997.27	1294.51	825.623	175.446	284.841	459.074	1328.28	709.548	797.957	1354.16	1313.66	1354.48
M416T397			0.407402	0.22623	0.00366178	416.117	396.839						4679.86	4487.87	9389.72	4054.54	1932.59	6466.16	2176.54	571.912	504.274	1199.24	1244.29	1319.29	3443.34	3403.74	3402.41
M331T389			0.29659	2.69248	0.00367315	331.197	389.118						52.5094	2075.69	1869.56	1882.22	171.743	150.597	2738.8	3455.29	2311.7	3325.97	2796.48	2071.35	1882.18	1882.53	1921.02
M904T174			0.509078	3.33292	0.00367469	903.586	174.345						5655.03	1039.3	8231.82	248.964	128.05	321.792	5522.35	9712.47	8258.34	10981.7	9556.35	8045.63	4832.77	5088.39	5084.16
M966T190			0.253307	3.09724	0.00367512	966.387	189.731						487.972	1465.33	148.023	422.986	911.888	1580.87	3752.62	2854.19	1238.91	3401.82	1657.54	2633.98	1364.13	1568.01	1346.34
M327T329			0.365424	2.59367	0.00368304	327.166	329.328						590.627	2723.89	4487.73	1625.4	496.913	711.62	4033.94	3635.83	5282.99	6032.91	4790.61	3810.44	2363.56	2389.98	2363.58
M611T17			0.0946408	2.06529	0.00368891	611.142	17.04						196.923	229.798	166.062	191.448	75.3151	358.747	479.374	449.867	560.106	253.217	419.307	354.259	344.273	344.465	326.346
M97T125			2.38528	0.330393	0.00369158	97.0041	124.789						260461	116071	92331.7	113968	191803	242107	42428.4	54436.3	43181	44177.1	79931.4	71769.9	114734	117197	114734
M625T30_1			0.594834	0.318488	0.0037144	625.227	29.581						15106.6	9650.88	9777.03	4743.62	11387.7	13067.1	1653.23	1925.3	693.798	4806.49	2149.36	9070.01	3938.52	4451.39	4464.44
M1012T301			0.1197	1.88694	0.00372893	1011.75	300.885						339.963	586.311	442.514	174.916	266.213	587.027	842.81	946.103	650.707	854.951	709.398	518.922	465.901	491.626	463.562
M472T46			0.892518	2.28682	0.00373382	472.244	46.081						14823.7	8050.17	26724.4	6645.07	16220.5	15874	16264.7	43959.3	29796.8	32535.1	41538.1	37919	31531.9	31037.5	31523.3
M752T136			0.575203	2.50396	0.00373747	751.545	136.108						5822.07	4307.44	9526.72	2712.3	3511.14	4431.72	9321.21	21250.5	10451.9	11464	11400.4	12010.7	9763.66	9988.28	9978.37
M544T33			0.285835	2.13486	0.00374154	544.447	33.256						2022.91	905.351	2643.09	1963.41	379.976	2363.39	3710.91	3862.13	3711.99	2906.9	5188.85	2561.6	458.507	458.424	548.959
M400T361			0.486464	2.77987	0.00375882	400.229	360.759						799.412	3310.89	7422.02	3076.19	1329.74	803.582	9446.39	9918.77	4875.78	9157.5	6731.24	6410.36	5127.67	5123.32	4316.25
M358T342			0.193149	0.614401	0.00376172	358.134	341.52						2025.44	2631.34	1799.16	2134.63	2278.93	1642.6	1096.41	1019.7	799.953	1469	1890.01	1412.38	1725.7	1706.11	1745.65
M679T59			1.02227	3.27969	0.00376782	679.357	59.22						575.99	24316.1	23910.7	5902.61	1035.24	351.243	32215.4	40427.5	20367.4	30667.6	36789.7	23496.3	19073.6	19088.5	18641.3
M236T325			2.59055	0.311268	0.00377722	236.057	324.995						244271	95501.8	169312	110353	308129	259827	73873.6	73124.9	18313.4	80110	63902	60273.2	125109	127017	127028
M188T214			0.231291	0.359417	0.00378023	188.056	213.986						1336.49	2042.79	1068.75	2960.75	2500.38	1499.02	649.069	709.361	442.721	1247.11	350.858	701.182	1143.31	1212.74	1144.16
M883T302			0.143493	1.71514	0.00378526	883.259	301.51						1034.34	388.276	1086.28	352.299	593.832	876.242	1037.97	1312.09	1263.93	1281.46	1280.82	1252.47	1073.95	1073.93	1084.58
M754T227			0.17103	2.19515	0.00378566	754.348	226.641						621.895	494.331	1067.19	357.581	511.87	393.345	1652.67	1381.44	637.476	1055.14	1316.3	1521.96	1113.94	1022.88	1026.12
M1008T126			0.381462	0.321958	0.00379006	1007.57	126.221						7374.72	5046.79	2447.76	5422.16	2913.81	5238.27	613.468	1865.2	208.733	1348.11	1906.48	3215.63	5003.48	5010.12	5223.73
M409T302			1.03299	1.30726	0.00379379	408.91	302.134						99125.2	78166.3	94978.9	56084.9	86879.6	99577.7	114645	112369	107958	113061	106778	118183	94755.7	95998.7	96029.1
M319T307_1			0.233465	0.46504	0.00380183	318.925	307.3						2947.71	2875.66	1604.64	2781.19	1495.91	1976.5	868.061	685.894	510.162	1566.66	1221.61	1510.1	1808.17	1808.3	1785.85
M1059T129			0.391392	0.380939	0.00380324	1058.59	129.013						3903.95	9123.06	5949.25	7952.18	6581.81	2910.96	1837.16	1356.22	2849.34	1942.93	2953.84	2934.78	4831.64	4777.95	4831.89
M501T411			0.387219	3.07533	0.00380851	501.265	410.798						899.933	2548.02	3518.72	1487.03	902.081	862.511	7566.31	5322.28	3081.3	7772.71	4193.12	3488.91	2748.67	2660.57	2740.21
M944T175			0.826239	3.66036	0.00380992	943.618	174.786						1308.84	4124.57	21803.1	2124.45	703.491	1114.13	14531.4	19863.4	14489	21664.1	19974.8	23601.9	12320	12317.9	12618.6
M743T302			0.278546	1.30037	0.00381163	742.776	302.164						6852.28	5791.48	7048.06	3957.61	6137.78	6951.74	8141.48	8330.03	7643.34	7708.88	7859.88	8090.67	6899.01	6923.25	6899.15
M524T229			0.55968	1.64259	0.00382031	524.295	228.708						13714.2	8290.67	14492.5	4767.46	14661	13770	19902.7	17796	15845.8	17032.6	22728.5	21176	15135.7	15135.9	14971.6
M1022T180			0.568646	2.41592	0.00382709	1021.62	180.453						7148.5	2847.42	10597.9	487.557	7109.72	2354.16	12518.5	12654.6	8205.32	11042.2	16806.9	12567.4	9594.08	9597.36	8344.3
M295T90			0.863638	2.26289	0.00383181	295.263	89.72						10274.7	16443.6	23991.4	2552.18	12193.6	15193.5	20876.7	29915.6	19519.5	37041.2	35652.6	39494	21038.7	21633.7	21049.3
M973T145			0.607478	0.49893	0.00383724	972.614	145.058						18468.6	14238.9	10327.3	8550.7	19575.4	18666	4907.77	7605.17	8183.3	7631.06	7277.26	9212.73	12689.6	12002.3	12681.6
M218T333			0.122785	0.620246	0.00385765	218.111	332.524						1040.95	1145.7	819.675	976.216	629.049	897.04	569.206	531.749	402.234	465.634	656.455	791.432	662.502	758.279	662.156
M393T305			0.580293	1.2398	0.0038646	392.878	304.783						36005.8	29797.8	37720.2	25359.8	33581.1	36735.7	40435	44017.6	43267.7	39482.5	38668.8	41097.5	34868.5	35230	35232.6
M1118T178			0.620719	3.09753	0.00386463	1117.65	178.414						2565.9	3659.79	12186.5	486.252	3909.18	1399.48	13644.4	6956.29	10529.8	12707.5	17883.5	13260.7	9010.5	9757.44	9015.35
M763T195			0.569805	0.181161	0.00387598	763.28	194.858						5946.81	15466	5985.09	13909.8	4745.3	6313.57	1537.95	1389.13	1214.61	2242.12	1567.02	1535.98	3421.64	3559.43	3553.51
M129T192			0.476816	0.341699	0.00388942	128.932	191.846						12467.4	9814.19	3956.33	10526.1	9455.25	3908.6	2471.16	3428.67	2878.63	2316.02	3338.13	2696.03	6172.52	6093.62	7502.29
M643T174			0.986445	2.71599	0.00389488	643.306	174.206						1677.58	13206.3	32497	15249.2	2221.96	1932.59	28265.5	33292.9	33212.8	26696.2	26817.3	33101.8	58365.8	58817.6	58818.5
M345T345			0.153338	0.602463	0.00389533	345.118	345.335						1411.37	1560.29	998.47	1551.02	1142.54	1040.95	660.735	778.893	509.209	746.764	781.047	1165.11	1010.72	1068.39	1009.27
M1113T234			1.02029	4.35284	0.00390125	1112.53	233.793						3675.13	968.441	12559.4	19794.3	3432.18	3092.95	35308.4	31865.9	10215.4	23738.2	53002.6	35315.4	15320.3	15603.4	15603.7
M339T651			0.26265	1.91633	0.00390186	338.93	650.502						2476.07	2039.21	1673.07	2813.64	387.569	1558.28	3508.05	4136.91	2416.91	3358.54	3204.79	4354.41	2346.36	2124.44	2131.66
M631T299			0.180959	1.20907	0.00390725	630.9	298.954						4005.6	3629.17	4127.35	2985.18	3888.83	4307.86	4607.28	4666.99	4735.2	4490.67	4273.47	4967.28	4104.68	4192.39	4192.54
M1091T233			0.376891	6.29289	0.00391447	1090.55	233.204						351.2	198.506	2153.41	37.7341	618.16	486.556	4166.62	3887.14	914.15	3154.66	7320.2	4756.96	1959.8	2024.35	1959.18
M999T66			0.566685	6.07818	0.0039195	999.375	66.154						579.396	1515.88	1977.96	4297.06	241.475	174.297	17373.8	10323.5	4110.86	6945.56	8202.83	6446.66	3158.84	2980.28	2981.28
M571T126			0.52898	2.50657	0.00392326	571.307	126.049						1684.43	5841.94	7790.39	3746.07	589.656	5031.27	7733.68	15169.3	11146	6344.42	10934.2	10543.8	10378.9	10378.9	10410.5
M251T459			0.144899	0.740922	0.00392485	250.986	458.99						1973.88	1710.81	1797.46	1940.15	2133.63	1901.42	1509.81	1867.44	1195.86	1183.31	1141.76	1590.83	1573.37	1570.99	1507.92
M331T307			0.129838	1.49044	0.00393616	330.888	307.228						1014.35	1129.13	951.329	643.781	946.301	1190.14	1142.41	1403	1666.5	1379.57	1839.9	1325.01	1170.55	1170.39	1159.82
M786T297			0.245627	0.491754	0.00394049	786.008	297.115						2661.18	4248.64	2977.41	2973.76	2385.24	2364.27	2005.83	2067.56	702.754	1581.4	467.769	1834.72	2216.95	2250.42	2250.26
M1084T300			0.19025	1.38178	0.00394103	1083.71	300.446						2776.7	2101.57	2724.14	1502.01	2577.76	2705.23	3017.73	3418.24	2800.36	3614.29	3439.59	3590.04	2831.63	2832.34	2741.43
M480T419			0.133736	1.61676	0.00394337	480.075	419.269						690.192	562.286	721.236	832.336	702.016	898.533	1087.07	1363.18	1259.12	676.865	1396.75	1341.42	820.75	813.073	812.495
M569T446			0.196553	0.413555	0.00394923	569.034	446.386						1128.67	1392.81	754.559	2268.96	1375.5	1466.19	540.169	449.292	264.158	711.539	685.809	817.397	1041.85	1058.03	1041.85
M762T148			0.876778	1.3635	0.00395543	761.58	148.156						59555.2	55350.5	61879	38141.2	67698.4	67774.6	65912.2	81514.6	86643.5	84067.6	87135.8	72495.4	66841.6	66841.9	66485.9
M849T189			0.439668	4.01429	0.00396645	849.476	189.134						851.856	1224.89	3908.62	628.524	992.382	1452.58	2636.33	8208.36	2754.2	8889.67	6331.07	7545.27	2875.49	2503.73	2880.85
M515T307			0.0984652	0.58891	0.00397159	514.877	307.202						726.955	601.193	552.073	686.115	470.763	411.139	181.884	424.929	263.514	422.692	373.991	363.692	444.301	462.355	444.503
M419T56			1.02862	2.79489	0.00397699	419.099	55.959						10349.9	9492.01	25769.7	23900	7546.76	6254.4	25018.8	57181.3	52047.3	42313.4	24123.9	32165.7	14529.6	14661.5	18212.4
M1185T123			0.453966	2.79513	0.00398277	1185.35	122.873						5476.58	2680.04	2986.38	5049.54	216.954	138.894	5161.2	11838.2	8337.59	6548.34	7998.62	6370.95	4879.51	4879.54	4944.35
M576T281			0.192649	1.54963	0.00398828	576.21	281.249						1885.99	2006.55	1823.91	1069.32	1427.37	1550.88	2504.08	3203.24	1920.86	2333.79	2223.32	2945.34	2158.56	1990.52	2149.53
M198T161			0.365751	1.95228	0.00400119	197.807	161.422						1749.62	3210.62	5457.83	1718.55	3211.88	2513.17	7164.57	6124.08	7309.53	5141.62	4852.02	4279.21	5212.88	5228.29	4669.21
M330T231			0.702577	4.12594	0.00401899	330.165	230.509						1477.2	5895.1	6298.77	4704.86	2201.1	970.882	20383.6	22442.4	5908.54	8523.32	20119.8	11527.6	13390.7	13594.3	13594.1
M699T441			0.132773	0.591072	0.00401944	699.159	440.713						738.129	1079.26	914.713	1345.82	853.698	789.014	388.226	688.235	483.988	681.73	500.824	638.301	812.977	812.964	803.263
M251T386			0.251341	1.61761	0.00402814	251.003	385.944						3200.78	2466.64	2989.2	2023.14	2147.68	3588	3681.55	4410.36	3109.98	4597.84	5658.78	5095.33	3348.99	3449.34	3348.63
M371T247_2			0.435355	2.26639	0.00403092	371.192	247.041						1538.31	5684.55	5293.54	3529.96	3061.55	1646.09	10563.1	8324.79	4165.45	9624.46	7927.87	6430.96	5154.5	5255.32	5154.42
M549T339			0.119499	0.542834	0.00403184	549.085	339.055						512.256	698.618	711.459	532.85	794.525	950.587	386.98	284.555	166.617	509.397	495.482	437.031	572.815	566.119	582.151
M918T184			0.400007	2.83864	0.00408713	918.462	184.4						1823.91	2302.97	3373.54	1765.23	1192.7	761.035	4959.84	9363.26	5270.87	4548.04	4258.37	3447.41	5459.8	6091.63	6095.1
M1122T303			0.167892	1.78963	0.00410238	1121.65	302.766						1379.09	628.909	1309.87	367.017	632.999	1232.76	1712	1644.15	1536.5	1800.27	1308.43	1932.22	1343.54	1343.49	1287.2
M378T105			0.687983	1.95533	0.0041052	378.263	105.102						16701.9	9355.81	16883.6	4412.92	11431.9	14046.4	16793.9	26892.9	15887.7	24521.4	29679.9	28636.1	16974.7	17095.8	17096.7
M631T33			0.415335	0.486361	0.00412928	631.398	32.9235						9370.32	4845.78	6547.16	4889.21	7883.93	7399.04	2392.81	1810.17	1884.54	4258.19	5463.9	4099.77	4215.71	4171.71	4215.22
M237T283			0.221808	0.517336	0.00413747	237.039	283.403						2792.73	2001.3	1723.74	1658.82	3093.12	2310.61	1559.12	1813.39	1055.08	946.868	997.925	653.194	1897.07	1896.32	1850.15
M411T373			0.218438	1.96296	0.00413845	411.162	372.529						655.568	1650.2	963.792	1003.2	1649.94	1389.25	2668.03	3540.49	1793.26	2348.94	2260.23	1742.11	1616.52	1589.05	1615.83
M767T38			1.06726	2.1889	0.00415112	767.255	38.233						353.713	31190.8	27190.8	33022.8	31066.6	164.016	43937.5	50958.3	41887.3	41526.5	45800.6	45099.8	27399.9	27664.7	27400.1
M565T115			0.911661	0.387072	0.0041597	565.067	114.569						42784.6	23035.2	18639.9	37067.4	19208.1	36986.8	3850.73	9449.05	6256.29	18594.5	15581.5	15059.2	23039.8	23037.4	21568.1
M554T182			4.27225	2.35278	0.00416207	554.344	182.491						346994	206120	482272	133186	439079	287974	705958	664804	398017	623429	1.06495e+06	1.00283e+06	578586	582385	578645
M843T299			0.628168	1.47921	0.00418855	842.829	299.02						25064.2	19210.9	25715.1	11467.9	18098.6	27647.5	32224.4	33657.2	26544.3	32114.3	29335.3	34286	24613.4	24907.9	24612.9
M411T302			0.568554	1.29062	0.00419396	410.907	301.548						30152.7	23813.4	30797.9	18456	27383.7	30964.6	36668	34448.8	34073.3	34359.3	32583.2	36391.3	29428.3	29755.1	29761.6
M494T231			0.804777	2.42344	0.00419642	494.25	231.374						10872.2	5722.97	22648.9	1595.74	11396.1	9417.59	31745	29537.3	13949.4	22038.4	29340.8	22802.9	18365.4	19193.8	19197.7
M95T122			0.606693	0.550184	0.00421327	94.9804	122.481						18683.8	12673.1	13873.4	25980.2	19827.4	18611.1	4678.77	10770.4	10276.8	11416.6	11119.5	12065	15391.8	16544.7	15430.9
M269T350			0.218013	0.575816	0.0042154	269.013	350.466						2359.2	1920.99	2262.49	1935.31	2951.44	3190.9	1640.6	1469.68	710.615	1587.88	1939.83	1070.01	1968	2083.09	2085.89
M431T338			0.358259	0.334685	0.00423552	431.139	338.438						4523.83	3894.89	2700.56	7422.17	6280.24	2564.03	1194.38	808.24	1609.65	2374.34	1675.25	1503.74	3297.38	3008.66	3006.38
M129T123_1			0.568995	0.542263	0.00423619	128.932	123.463						19083.5	19863.4	11157.2	9659.69	14228.9	17192.5	7904.12	9607.9	4533.73	8756.55	9260.22	9383.88	16277.1	14129.7	14214.6
M430T153			1.0533	2.67264	0.00424976	429.986	152.675						4595.93	10685.1	29984.4	25652.6	6547.33	9204.36	49542.2	52317.1	24645.7	26149.1	33736.4	45247	24077.1	24484.3	24078.5
M475T94			0.799693	0.209943	0.00425023	475.135	93.808						25303	9920.34	9373.41	14274.1	31991.5	14968	4719.54	1351.76	3609.02	1511.35	6321.15	4705.55	11785.8	11741.8	12873.9
M943T299			0.371726	1.44702	0.00425059	942.804	298.996						9016.91	7595.4	9355.9	4483.57	6955.64	9327.33	12102.8	12496.8	9190.63	11868	10026.1	11941.8	9279.88	9380.14	9384.1
M1154T85			0.671338	2.81331	0.00425672	1154.41	84.679						12594.8	1020.02	4564.64	9423.17	77.5985	10915.2	17446.3	15104.1	23359.6	11241.2	26357.4	15072.6	5370.95	5193.72	5370.98
M926T190			0.618796	1.89987	0.00426111	925.53	189.754						13256.9	9222.69	13370.6	5948.49	10314.6	10521.3	21073.8	21574.9	10157	17436.1	26852.7	21902.9	16020.6	15650	15653.5
M351T307			0.240376	1.18142	0.00426897	350.868	307.035						7431.5	6449.25	7280.24	5602.63	7582.8	7593.81	8706.23	8086.64	8126.67	8003.75	8450.81	8174.81	7453.63	7538.26	7453.81
M407T57			1.1567	3.54093	0.00427135	407.108	56.56						14438.2	10815.6	11579.3	9009.44	13334.6	7492.45	50662.5	63504.2	53390.2	22819.8	24976.2	20719.6	18847.3	19104.2	18354.7
M432T294			0.294175	0.486892	0.00427374	432.064	294.096						3110.69	4166.16	2688.7	4069.21	5803.75	3122.16	1729.8	1547.18	864.162	1859.33	2617.68	2561.22	2697.39	2767.27	2764.57
M445T427			0.254198	1.88209	0.00428055	445.095	426.754						3652.23	2029.55	1970.21	2295.02	1227.6	957.261	3133.68	3129.66	4348.12	3511.29	3775.44	4935.06	2483.62	2678.99	2678.17
M1186T145			0.292577	4.21437	0.00429027	1185.82	144.896						41.8737	1256.07	1573.09	473.108	40.8881	83.0427	2457.8	4383.08	1623.11	2286.75	1480.09	2384.91	2123.4	2364.62	2106.83
M682T54			0.750956	0.160621	0.00429979	682.187	53.903						9956.39	25700.5	11668.7	24330.9	7688.67	9279.34	623.832	1135.3	879.838	3361.69	2689.43	5544.85	12688.9	11718.9	11727.2
M240T109			0.684749	0.282773	0.00430428	240.035	109.037						21952.5	7355.6	15958.6	4545.37	14858	17046.4	3014.54	3579.85	3330.41	4611.49	3757.99	4812.97	10051.1	10049.8	9505.74
M302T386			0.243835	2.11067	0.00431642	302.055	385.887						2179.75	983.2	1416.9	647.964	1051.47	2045.47	2950.44	3755.41	1626.87	2356.07	3734.92	3147.08	1875.12	1887.53	1887.54
M871T183			0.401347	2.11129	0.00432043	870.519	182.609						2630.14	4080.08	5607.68	2020.61	3173.68	2173.3	5206.58	4719.32	6322.1	6581.22	9584.63	9147.85	5882.05	6093.44	5884.66
M182T125			0.373227	0.263722	0.00434657	182.448	125.113						6142.88	1789.82	2702.81	2197.02	4415.45	5641.81	570.638	1302.45	855.392	738.612	1364.77	1204.68	3024.24	2483.62	3025.26
M187T427			0.121866	0.696078	0.0043763	187.024	427.381						1325.07	1046.19	868.221	1221.7	1048.83	1110.63	763.68	811.855	657.597	1027.95	790.736	556.664	1054.27	1099.71	1083.73
M172T125_2			3.59679	0.301392	0.00437731	172.036	124.79						584899	252378	175027	242433	431583	525417	84139.2	105845	88217.3	82505.6	169568	136325	242378	239440	242378
M225T288			0.258415	0.481016	0.00438433	225.112	287.584						2221.99	4164.9	2666.21	4141.21	2238.61	2036.33	1532.83	1551.56	1092.35	1175.54	1356.46	1694.23	1413.22	1376.69	1376.67
M856T55			0.420354	0.4985	0.00438511	856.447	54.5685						6836.05	9273.75	4350.3	11806.5	8473.66	8475.6	2496.97	4765.02	5769.76	3675.18	3263.3	4563.85	6476.27	6277.66	6477.93
M592T389_1			0.141862	0.607145	0.00438562	592.134	388.508						852.399	1607.76	964.784	1447.13	1187.41	1023.98	572.861	665.92	783.175	704.973	710.824	862.931	968.809	968.832	988.55
M591T54			0.815518	3.50443	0.004388	591.159	53.948						1854.07	15621.9	12852.9	228.633	2112.44	2140.79	15239.3	22224.4	18307.8	14220.9	33673.3	18325.9	13123.8	13199.1	12949.3
M269T44			2.18265	1.49428	0.00439031	269.247	44.112						245585	266401	195646	229123	219852	297450	357534	487174	343824	367938	351724	264580	268652	255760	268513
M349T163			0.367344	2.9743	0.00439381	349.211	162.807						1669.21	688.079	4720.15	1070.71	180.774	467.38	2780.84	5501.15	3714.91	4777.15	4451.64	4937.18	2888.21	2965.78	2910.7
M275T150			0.282513	0.335983	0.00439824	275.052	149.927						3102.07	1664.96	800.463	2555.99	3455.2	3102.24	609.683	387.525	988.715	1318.39	1128.96	499.265	1833.37	1832.58	1069.72
M394T347			0.354715	2.46977	0.0043992	394.16	346.593						681.408	3323.68	3575.25	1854.15	799.158	483.991	3820.21	4990.39	2816.06	6067.95	4469.88	4305.58	2922.84	3084.71	3085.75
M1174T102			1.27055	3.95717	0.00444166	1173.54	101.516						2945.95	20811.5	31819.1	4824.23	9448.62	4698.4	22491.6	68231.5	37940.8	28987.6	69956.8	67390.3	23337.6	23234.1	19081.4
M100T703			0.139978	1.40379	0.00445573	99.9253	702.944						1397.97	1086.15	1097.43	1364.32	1232.73	1505.57	1996.89	1452.19	2003.31	1869.16	2080.53	1384.88	1395.58	1387.91	1096.91
M251T355			0.621972	0.216123	0.00446047	251.076	355.013						6915.93	16109.4	7372.52	20078.2	11525.6	5366.82	1670.54	1968.23	1209.46	3525.86	3116.04	3069.72	6801.09	6800.56	6583.47
M604T155			0.258677	1.70148	0.0044613	604.321	155.176						2235.25	2326.53	2908.98	1063.09	3039.16	1487.43	3311.09	4900.86	3350.41	3414.92	4080.69	3164.17	3287.06	3190.37	3183.4
M997T181			2.00156	2.46185	0.00446861	996.612	181.341						81166.8	33051.8	122798	7274.83	70147.6	65683.8	156895	138458	100076	121095	231425	187858	134952	136654	134952
M383T451			0.724166	0.412281	0.0044867	383.06	451.492						19698.9	29266.5	16641.4	25733	13213.7	13961.9	4100.67	4872.38	5896.67	15465.1	10598.6	7928.13	13679.2	14281.2	13679.2
M140T124			6.92692	0.28261	0.00448749	140.01	124.357						2.14988e+06	873520	636898	847733	1.56275e+06	1.92497e+06	290062	378559	297934	289508	563594	440016	836099	832621	836103
M323T299			0.198924	0.494173	0.00449439	323.04	299.279						1806.32	1754.52	1845.53	1229.18	1464.77	2221.67	591.157	1013.7	331.834	409.701	1463.82	1290.63	1542.26	1518.54	1509.74
M177T289			0.368088	0.481763	0.00449737	177.039	288.856						4619.99	7347.28	3872.94	8911.21	4619.54	4948.01	2893.8	2370.59	2303.42	3146.9	2958.05	2860.83	4153.89	4242.2	4156.6
M692T295			0.242763	0.543999	0.00452599	692.015	294.869						3735.02	3025.31	1938.35	3791.93	2904.81	2231.63	1883.42	1233.53	838.534	1848.11	2176.95	1608.56	2723	2723.51	2479.49
M471T47			0.682394	2.05717	0.00452635	471.232	46.696						10477.2	7553.52	17352.6	4319.28	13393	10745	10747.5	25357.3	20313.3	21633.4	27002.7	26276.6	22580.6	22579.6	23061.1
M483T31			1.27462	0.219837	0.00452715	483.093	30.943						67977.4	24892.9	23757	18832.7	60891.1	52321.4	3673.46	9377.01	6797.58	13443.4	8654.56	12721.5	26829.9	26749	26749
M547T404			0.215452	2.66644	0.00456524	547.271	404.39						97.5538	993.743	1160.76	925.454	197.903	142.56	1818.5	1640.19	1472.11	2213.99	1303.33	932.34	898.161	1044.9	890.698
M296T91			0.56285	3.23562	0.00457409	296.266	90.582						2517.49	1229.38	9824.82	138.926	2370.89	3254.06	8196.78	7995.96	8342.32	12559.9	8917.55	16550	7361.41	7774.4	7769.53
M424T131			0.540852	0.360695	0.00458097	424.162	130.627						4708.98	12925.9	8892.4	17060.2	8347.42	9979.11	2186.28	3894.8	2648.65	5576.46	3023.52	5002.39	8994.82	9025.69	9025.82
M578T177			11.3724	2.28521	0.00458688	578.345	177.446						1.95302e+06	1.20865e+06	4.94719e+06	270167	2.80426e+06	2.07159e+06	5.19516e+06	4.98906e+06	3.17689e+06	4.83017e+06	6.19652e+06	5.90237e+06	4.80003e+06	4.8153e+06	4.81539e+06
M458T329			0.273669	2.54671	0.00460054	458.296	328.667						360.39	1682.61	1945.79	1567.09	482.418	349.786	2826.08	1694.31	1941.83	3731.85	3546.37	2528.18	2517.66	2517.54	2557.4
M460T37_1			1.81905	2.56565	0.00460928	459.733	36.927						41262.6	10372.5	83380	88000.1	40467.1	19633.2	87644.4	159418	80171.3	114618	174293	110230	83193	83787.1	83989.1
M648T175			0.297723	2.62074	0.00461319	648.357	175.312						907.235	1611.93	2694.12	253.317	1144.95	986.865	1928.47	3330.36	3275.73	2658.06	3453.75	5267.12	2815.44	2727.08	2815.33
M920T298			0.191122	0.477502	0.00462225	919.936	298.188						1822.05	2542.05	1261.98	1303.47	1269.38	1684.16	1191.17	906.921	416.934	470.1	961.031	773.047	1512.29	1402.77	1402.45
M444T151			0.451166	3.2698	0.00462612	444.269	151.37						1305.61	2711.96	4553.77	551.748	1308.96	1073.55	5780.2	9289.09	9544.7	4674.58	4796.66	3535.75	4878.18	4881.47	5166.95
M602T454			0.201079	3.11113	0.00462779	602.23	454.42						358.467	700.272	488.088	532.88	329.242	429.735	2044.04	2184.38	554.131	1768.11	1454.97	825.884	917.581	991.015	991.191
M299T370			0.198619	0.6231	0.00462908	299.024	370.079						2901.16	2222.24	2174.88	1465.4	2539.76	2233.51	1444.14	1739	859.154	1605.6	1210.94	1576.05	1890.4	1890.4	1902.55
M186T213			0.268132	0.661578	0.00464251	186.113	213.06						4879.32	4452.03	7067.78	4419.72	4859.26	4092.42	3070.68	3543.73	2687.98	3686.91	3228.33	3477.91	4332.47	4452.49	4453.56
M956T406			0.198445	2.17149	0.00464386	955.521	405.764						532.827	984.469	1342.03	643.908	294.368	387.976	1379.56	2087.97	1702.87	1676.67	1218.87	1022.97	1032.21	1046.87	1046.87
M488T408			0.281782	2.26383	0.0046469	488.27	408.173						370.057	2375.17	2382.08	1548.84	465.126	297.05	2630.91	2860.06	2271.26	3312.5	3082.63	2681.72	2045.96	2034.09	2034.07
M1171T178			0.447705	2.28299	0.00464909	1170.69	178.27						5139.35	1216.42	5663.4	643.011	4677.03	5232.64	7962.6	10472	4844.21	7095.58	10996.1	10160.7	7777.77	7768.66	7827.38
M316T440			0.214846	2.37917	0.00466555	316.161	440.149						178.711	851.17	1737.1	618.416	282.496	226.595	1419.21	1736.07	1502.62	1617.41	1555.97	1434.36	1169.18	1171.43	1208.76
M496T387			0.131549	1.41504	0.00467385	496.135	387.217						1264.9	1186.85	983.432	678.378	904.22	1098.06	1701.35	1426.5	1228.45	1491.71	1583.75	1222.38	1311.46	1310.29	1385.73
M1129T178			0.233348	2.22853	0.00470639	1128.64	177.671						2058.81	377.216	1009.33	69.4679	1421.18	1571.89	2819.89	2320.95	1873.6	1796.89	2761.65	2930.05	3309.08	3828.97	3830.62
M212T19			0.163841	0.601862	0.00472411	212.074	18.9325						2172.98	2072.51	2284.43	1734.31	1151.15	1523.04	930.224	937.043	1464.7	1298.79	933.263	1019.39	1973.69	1967.2	1798.59
M1176T30			0.448742	1.89715	0.00472435	1175.77	29.71						7971.42	5561.97	8213.03	4114.83	4850.41	11062.7	8364.91	10242.8	16023.9	14447.7	16936.3	13236.6	11973.9	11973.3	11695
M98T422			0.0840319	0.74936	0.00474198	97.9591	421.952						569.76	636.946	695.78	709.423	807.116	792.472	578.594	459.19	413.672	611.56	514.317	578.595	538.791	522.397	514.95
M315T358			0.450185	2.2833	0.00475193	315.202	357.514						1333.71	5881.06	5453.52	4411.78	925.144	1157.47	7256.13	9672.34	5330.19	8352.34	7009.03	6134.04	4472.29	4756.85	4757.21
M400T404			0.288961	0.283467	0.00475589	400.123	403.906						2540.88	3494.69	4965.8	2369.36	934.299	2465.68	1173.82	786.999	652.676	588.881	791.58	759.991	1727.65	1839.97	1730.83
M657T146			1.40803	0.22553	0.00476149	657.237	146.236						45109.4	59528.5	46865.4	117002	40648.6	39493.4	6668.8	8431.34	7841.49	22652.1	12196.5	20840.1	39696.1	42126.4	39669.8
M595T113			2.34842	0.35509	0.00479252	595.077	112.59						236312	219706	116436	240365	83074.3	262640	19439.2	73640	22755.8	122008	80755.1	92786.2	156543	144699	156412
M351T161			0.347114	2.03399	0.0047999	351.227	161.299						2097.79	3223.66	3987.31	3284.6	2080.58	1015.15	2822.79	7298.44	4801.76	6040.75	5293.54	5654.13	3388.56	3578.42	3389.75
M231T58			0.366198	2.61791	0.00480007	231.211	57.951						522.156	1210.94	3477.42	3799.78	683.413	828.852	4213.95	5767.43	2890.86	4309.48	6280.15	4085.2	3563.88	3529.76	3529.92
M880T306			0.174781	2.06905	0.00480346	879.567	305.947						1279.61	107.127	821.897	1169.71	232.508	1294.81	1531.68	1638.28	1633.19	2068.62	1931.78	1346.49	1075.78	1075.88	1050.9
M295T303			0.163745	1.27729	0.00481204	294.959	303.473						2830.03	1993.52	2329.02	2217	2206.93	1956.3	2813.04	3355.98	2979.27	2480.79	2824.17	2831.99	2586.01	2586.87	2649.93
M247T262			0.58952	0.264367	0.00482404	247.166	261.61						13533	11161	18016.7	7599.11	20857.4	4496.17	4081.3	1954.52	1795.66	4116.98	4842.99	3211.42	8476.3	8551.21	8506.34
M649T22			0.10927	0.596022	0.00482662	649.241	21.933						697.27	966.997	950.174	882.652	710.937	656.38	283.501	478.616	732.55	558.7	559.376	286.55	720.256	734.731	719.685
M326T157			0.544765	0.410746	0.0048338	326.086	157.042						11891.8	9964.79	9014.96	15056.7	9968.92	8571.72	2457.14	1383.5	1160.52	6710.19	4438.99	10330	8252.19	8640.77	8239.19
M258T367			0.476835	0.39829	0.00483793	258.061	367.415						10120.3	10389.5	4914.66	10411.5	6577.31	6632.74	1722.06	1039.43	1356.24	3325.73	6411.76	5679.3	5457.82	5590.78	5454.4
M574T239			0.315626	2.41289	0.00486882	574.275	238.557						2634.2	1719.27	1009.77	1644.43	1908.48	1676.22	4181.54	5130.39	1904.06	2932.4	6337.08	5072.74	2668.25	2497.61	2486.03
M243T72			0.874671	0.295367	0.0048857	243.086	72.19						32050.6	16400.6	13888.3	16649	41339	19368.1	4457.76	6703.95	4028.67	7910.97	10085.6	8074.46	17946.3	17628.6	17784.8
M243T320			0.900269	0.288194	0.00491627	243.123	319.697						29151.5	41911.1	18948.9	37079.9	16851.5	12650.1	3617.91	4601.45	2500.56	13961.3	9952.13	10495.8	18531.4	18621.4	21887
M561T419			0.217135	2.68557	0.00492741	561.293	419.354						175.925	1444.18	865.284	781.024	71.8008	225.75	1106.82	1913.24	1815.96	1242.79	2170.77	1321.71	900.032	829.672	900.761
M333T165			0.419377	0.390015	0.0049329	333.107	164.663						6573.31	9110.32	4836.5	8476.66	9051.95	4573.12	1016.41	6701.48	1428.83	2594.74	3336.98	1544.74	5132.93	5462.47	5456.67
M433T195			0.163467	2.23443	0.00494065	433.317	195.403						856.933	376.359	355.924	178.937	595.506	853.266	1701.36	1195.19	815.343	784.049	1426.16	1265.87	972.752	972.817	989.577
M356T216			0.212268	0.418219	0.00494586	356.206	215.988						1793.11	1612.63	1092.67	906.302	2686.11	1730.31	632.088	669.369	450.643	591.259	834.947	929.075	1198.22	1217.9	1208.22
M301T140			0.697058	0.368772	0.00494826	301.091	140.122						13696.2	23065.1	6498.49	25849.5	19595.9	14298.3	9176.37	3855.98	5083.38	8735.2	4932.63	6201.22	12190.9	12281.9	12282.2
M513T133			0.447613	0.325327	0.00497853	513.127	132.794						5035.17	7460.35	3839.83	11938	4904.2	6676.3	407.91	3272.27	2271.17	1938.17	2341.25	2734.77	5283.67	5281.66	5181.96
M595T74			1.68958	0.23974	0.00499905	595.077	73.623						101437	76529.7	42108.9	147667	35918.4	103084	926.994	21979.1	9380.35	34545.2	26878.7	27776.7	51009	52913.5	51007.6
M85T22			0.155967	0.510905	0.00504201	84.9505	21.673						772.507	1314.23	1324.02	2045.85	1582.36	1529.23	695.849	472.805	1127	631.76	867.06	583.059	1361.32	1363.86	1418.68
M633T30_2			1.07785	1.71971	0.00505779	633.471	30.222						42444.9	29547.1	45914.2	13314.4	50249.8	47735.4	68881.9	83491.9	54668.1	63698.7	73605.9	49821.4	43475	44095.8	43476.4
M719T123			0.256694	0.270237	0.00506215	719.367	122.727						1096.59	2735.08	1305.4	2613.85	4010.4	1775.99	234.598	1042.44	387.893	850.058	483.63	659.666	1750.22	1441.64	1442.54
M229T77			0.574351	1.99172	0.0050729	229.18	76.727						12082.6	5336.66	11485.4	2845.14	8792.75	8613.9	14301.9	23234.7	10336.9	15805.7	15955	18271.4	15065.8	14810.9	14776.4
M232T427			0.373829	2.62536	0.00507813	232.13	426.562						585.89	3997.88	3366.4	1923.13	744.727	810.235	4406.19	5206.35	3667.13	7869.48	5006.25	3847.92	4250.04	4240.63	4089.03
M844T261			0.203521	3.04762	0.00508216	844.457	260.895						281.798	634.78	1071.3	457.848	176.478	127.429	1322.93	1653.2	977.718	2279.93	1395.11	750.964	984.077	967.202	967.294
M677T440			0.535435	0.452851	0.00509432	677.176	440.227						10027.2	14287.1	11061.3	18792.4	8912.45	7849.83	3432.27	7225.75	3307.23	7415.3	5114.06	5626.26	9214.38	9232.23	9190.43
M1088T178			0.333091	2.19659	0.0050992	1087.69	178.292						1911.34	672.95	3448.74	3467.81	2093.55	870.813	3252.64	5794.64	2880.4	5493.13	4947.7	5012.35	3318.97	3323.88	3150.07
M225T33			1.15334	0.119715	0.00517284	225.076	33.0275						26216.9	26049	6302.78	44535.6	32691.3	66154.2	416.101	1757.87	3268.54	7224.85	4158.37	7350.79	12853.7	13175.8	12851.6
M255T440			0.247433	0.622726	0.00517653	254.999	440.227						4242.53	3257.01	1974.23	4254.14	3439	3552.02	2217.61	2296.21	1801.25	2649.63	1805.8	2131.72	2314.77	2319.68	2128.74
M577T49			0.545436	2.59072	0.00521308	577.118	49.344						1424.47	8201.08	5179.8	7338.21	919.221	1024.95	6173.03	15149.4	11115.1	9770.53	10277.9	9918.54	6389.69	5894.96	5835.8
M613T157			0.360551	2.5513	0.00521498	613.342	157.053						1110.06	1973.67	4623.75	401.093	1208.34	659.947	4878.3	5368.63	4769.67	3390.7	3298.22	3748.43	3518.58	3243.17	3240.46
M140T125			0.381327	0.303786	0.00521681	139.578	125.027						7284.97	3208.79	3657.47	2539.6	3337.49	6834.86	716.659	1190.92	1242.09	903.703	2623.6	1483.68	2534.25	2733.91	2528.91
M358T59			0.606419	2.69732	0.00522306	358.092	58.761						2914.31	9866.48	10689.4	1930.62	758.701	714.635	9728.33	15738.2	9310.08	13561.9	13462.7	10687	12440.5	12451.7	13877
M829T301			0.198439	1.54528	0.00522669	828.817	300.856						1655.09	1578.43	2266.1	899.135	1638.97	2159.33	2565.1	3343.35	2257.62	2224.03	2791.52	2575.69	1729.13	1752.85	1674.42
M478T167			3.75309	1.84302	0.00523697	478.292	166.501						621539	246693	528674	43177.1	455954	443460	734969	829783	754163	713908	707924	570992	564489	567154	567160
M645T281			0.86038	2.72029	0.00525351	645.324	281.05						18977.6	3070.6	19993.1	2423.02	9168.75	10897.7	26609.2	26111.7	11540.2	33921.9	38799.7	38559.7	22725.9	22881	22725.8
M1086T307_1			0.248445	4.35188	0.00525498	1085.5	306.536						60.5035	1024.26	1016.83	169.731	79.7447	204.523	897.556	3293.9	1637.78	1106.94	2274.03	1911.4	1533.13	1455.7	1455.83
M435T225			0.484547	2.27684	0.00525772	435.223	225.042						2280.62	4117.79	9640.26	1986.92	2399.95	1793.56	7065.53	9357.57	7059.96	9878.62	8028.44	9199.27	4974.38	5031.27	4975.03
M722T171			0.2497	0.471689	0.0052652	721.505	170.792						3381.21	4275.62	3023.75	2225.06	2177.2	2770.08	1745.38	744.968	1976.65	1044.21	514.69	2395.13	2602.92	2661.89	2603.02
M388T141			0.673019	0.286489	0.00527495	388.203	140.548						9641.79	19925.7	8605.22	23374.6	12506.2	8812.4	2174.54	2509.96	2040.48	4209.14	4137.55	8668.49	10646.2	10648.7	9441.81
M308T168			0.258488	0.364483	0.00530305	307.972	168.207						2388.9	3168.3	800.957	3028.32	2103.55	2895.75	1493.03	299.643	1462.71	372.7	1222.2	393.079	1506.78	1183.13	1203.75
M93T95			0.438543	3.79862	0.00530387	93.0535	95.368						1678.86	706.263	2268.15	1100.31	1992.21	2524.65	4158.32	2590.81	4183.03	8316.3	9838.24	9926.81	3435.85	3753.21	3441.85
M924T299			0.230739	0.651674	0.00530698	923.917	298.996						4028.02	4623.9	3205.55	3489.72	3323.37	3393.1	3238.92	3343.14	1872.26	1918.27	2084.29	1921.44	3197.88	3117.52	3196.69
M353T211			1.45012	0.190253	0.00532877	353.086	211.145						25859.7	89419.3	28914.6	99731.9	54774.2	43521.8	5580.99	4541.71	2775.49	19649.2	14524.6	18036.7	28493.6	28823.4	28495.1
M770T186			0.434294	0.309297	0.00533628	770.495	186.061						6655.17	4468.91	4261.74	2721.22	7596.79	9758.02	1816.51	562.27	3628.43	2710.66	948.099	1302.27	4043.65	4030.78	3418.73
M276T37			0.623026	1.48452	0.00536737	276.204	36.861						20399.3	26817.7	22191.7	24241.6	14051.4	27118.9	25681.2	36064.4	29304.3	39974.8	38784.8	30334.9	25581.9	29408.7	29479.5
M340T299_2			0.219206	0.399922	0.00537686	340.019	299.01						1947.06	2844	951.395	2378.51	1760.22	1812.19	857.2	509.543	1708.21	251.311	651.592	698.585	1162.86	1106.51	1164.46
M428T245			0.171132	0.556034	0.00538022	428.121	245.181						862.314	2074.93	1571.14	1855.41	1498.7	1262.59	766.94	599.675	728.303	897.17	965.609	1116.17	1037.54	1118.77	1011.67
M543T229			1.02554	3.08987	0.00538257	543.254	229.012						8354.38	8204.53	31755.6	3836.49	9905.2	6071.88	33667.3	19907.6	23741.4	32955.2	52467	47768.5	24224.3	24224.5	22049.3
M475T396			0.261244	0.578394	0.00541883	475.128	396.211						5515.07	3811.02	3705.58	3559.44	4779.6	3310.05	2910.77	2487.98	3702.99	1375.98	1680.88	2116.61	3225.17	3362.36	3277.87
M803T99			0.945742	2.82458	0.00544156	803.232	99.498						2251.23	22869.4	20972.7	11459.9	3810.08	2341.88	20507.6	37517	41312.4	16718.1	30985.9	32899.6	23065.7	20319.6	20515.3
M861T124			0.39784	0.462258	0.00547539	861.265	124.459						7045.42	5064.23	4927.36	3575.24	7748.02	7010.51	2124.88	1958.2	1172.69	1934.24	4155.41	5005.02	4973.06	4965.33	5309.06
M1138T233			0.311833	2.54963	0.0054763	1137.53	232.711						1009.53	217.455	2631.07	2663.33	1105.68	1134.47	4025.88	3225.2	2071.91	3149.62	5717.24	4148.85	2636.59	2636.59	2661.57
M259T315			0.286061	0.446305	0.0054909	259.118	314.826						2118.65	4406.74	3128.19	4287.01	2460.07	2376.91	838.792	909.332	693.436	2319.24	1756.84	1862.89	2233.55	2276.94	2277.35
M611T156			0.505537	2.43745	0.0054943	611.327	155.737						3227.52	5421.66	9481.31	1896.73	1024.53	985.385	8484.13	9453.4	7097.07	8173.32	8669.69	11836.9	6428.94	6838.14	6841.8
M790T129			0.519562	1.62841	0.00549618	789.61	128.977						11944.7	8219.93	10065.4	8744.1	10675.4	9489.13	24035	16583.6	14471.2	13926.8	12977.1	14308.3	10659	10730.6	10660.6
M276T333			0.410221	0.622381	0.00550388	276.033	333.27						12020.6	6923.38	9060.38	9008.69	12242	11262.9	6911.93	3595.36	7635.56	5324.45	6274.1	7923.76	8060.24	8058.99	8241.06
M615T179			0.46973	2.11761	0.00552508	615.338	178.722						3503.3	3279.48	9578.11	2315.13	3326.23	3992.92	9906.71	9268.43	5649.55	9154.77	12198.8	8869.31	4442.2	3898.71	3930.49
M1122T178			0.49451	1.95746	0.00553499	1121.67	178.464						4999.88	2318.23	10245.9	8825.12	5072.73	4486.03	12534.4	7840.65	9351.17	12618	15298.2	12724.1	9167.34	9170.92	9555.05
M1026T234			0.332974	3.15345	0.00553576	1025.5	234.022						568.28	2174.36	2961.28	625.243	339.906	141.868	2728.37	4327.11	1533.31	4676.35	3548.61	4664.2	2680.63	2680.97	2644.36
M303T30			0.292788	0.4953	0.00556253	303.198	29.875						3915.93	4510.11	3006.67	3538.56	4595.36	3558.97	667.085	1750.45	2109.68	3356.85	452.307	3117.74	3519.85	3671.78	3669.63
M594T175			0.320446	2.47007	0.00556369	594.374	175.305						1949.75	863.328	2372.03	74.3722	3083.8	1780.68	6133.91	3818.54	2754.99	3087.35	5502.8	3709.32	2859.67	2859.65	3092.58
M599T33_1			0.547212	0.550976	0.00557635	599.408	32.928						18315.4	12246.1	15500.7	9380.36	16846.4	13618.7	7999.98	4704.59	4071.54	9167.86	12318.5	9070.63	10194.9	9378.03	9145.13
M1050T182			0.517616	3.67353	0.00558237	1049.67	181.901						2366.31	1185.71	4625.88	542.57	4074.45	1746.69	8127.28	7437.14	2370.56	8405.64	13823.9	13254.4	6699.83	6695.07	6885.32
M816T240			0.248892	2.8194	0.00558291	816.447	239.611						124.212	1388.34	1536.63	196.972	1554.48	27.8488	3389.24	2257.58	1634.13	2649.78	2125.43	1557.28	1508.48	1460.72	1459.86
M85T460			0.493319	0.661474	0.00560049	85.0291	459.631						16220.8	10496.6	10683.4	15921.8	17686.4	17267.5	9125.26	10078.1	7966.65	9296.91	10544.2	11381.5	8388.08	8762.06	7526.09
M470T208			0.193481	0.458561	0.00561468	470.129	207.566						1641.13	2046.47	1122.26	2508.53	1460.88	892.111	621.554	751.429	724.753	839.988	584.296	912.893	967.566	1004.55	967.743
M243T376			0.404991	2.81774	0.00561511	243.098	376.116						1301.18	1816.18	5609.75	845.406	1430.19	1115.19	5446.97	5010.31	2601.34	7978.4	6507.16	6600.95	3804.76	3824.86	3804.89
[truncated: 8,298 more rows]
