# Supplementary material for: Multi-Omics Reveals the Effect of Population Density on the Phenotype, Transcriptome and Metabolome of Mythimna separata
Source: Insects. 2023 Jan 10;14(1):68. doi: 10.3390/insects14010068 (PMC9861010; doi:10.3390/insects14010068)
Supplement: Supplementary file 1 [file insects-14-00068-s001.zip › Table S6.xlsx]

## Sheet: Sheet1
ID	G-1	G-2	G-3	G-4	G-5	G-6	S-1	S-2	S-3	S-4	S-5	S-6	SuperClass
Sm d34:2	0.313566	1.18915	1.20129	1.20459	1.11676	0.308117	-1.05487	-1.11424	-0.494211	-1.10239	-0.460864	-1.10688	Lipids and lipid-like molecules
Timosaponin b ii	1.0699	1.26026	0.776788	0.975026	0.801184	0.403437	-0.825759	-1.08857	0.0413688	-1.3799	-0.833048	-1.2007	Lipids and lipid-like molecules
Quinate	-0.725725	-1.59587	-1.15713	-0.794542	-0.748011	-0.234842	1.08767	1.28059	0.40049	0.75917	1.24398	0.484212	Organic oxygen compounds
1,4-d-xylobiose	-1.03623	-1.06642	-1.16768	-0.575262	-0.838117	-0.553995	0.669221	1.64177	0.329066	1.48818	0.596825	0.512643	Organic oxygen compounds
Adenosine 5'-phosphosulfate	1.16372	1.12817	0.754469	0.0744874	1.05497	1.00278	-0.804429	-0.943702	-0.240953	-1.72394	-0.870649	-0.594922	Nucleosides, nucleotides, and analogues
Sm d34:1	-0.00875438	1.20973	0.840329	1.67115	1.24868	0.116921	-0.993369	-0.893567	-0.56883	-0.916711	-0.678047	-1.02753	Lipids and lipid-like molecules
2-amino-3-[hydroxy-[2-hydroxy-3-[octadec-9-enoyl]oxypropoxy]phosphoryl]oxypropanoic acid	1.20336	0.719475	-0.020759	0.427443	1.55119	1.1353	-0.754993	-1.17519	-0.133989	-1.40319	-0.677121	-0.871525	Lipids and lipid-like molecules
8-hydroxyquinoline-2-carbaldehyde	0.265013	1.35263	0.0758045	1.38757	0.896229	1.03334	-1.17829	-0.725322	0.0247736	-1.31267	-0.961217	-0.857861	Organoheterocyclic compounds
.beta.-resorcylic acid	-0.900351	-0.907158	-0.903855	-0.772178	-0.704997	-0.764587	1.23334	-0.068144	0.561173	2.03005	0.287095	0.909617	Benzenoids
Schaftoside	-0.86214	-0.917401	-1.05621	-0.57783	-0.731205	-0.794642	0.539647	1.41804	-0.174767	1.86945	0.91167	0.37539	Phenylpropanoids and polyketides
6-[4,5-dihydroxy-6-methyl-3-[(2s,3r,4r,5r,6s)-3,4,5-trihydroxy-6-methyloxan-2-yl]oxyoxan-2-yl]-5,7-dihydroxy-2-(4-hydroxyphenyl)chromen-4-one	-0.842377	-0.821504	-0.879144	-0.880984	-0.716761	-0.763837	-0.451144	0.5503	0.803054	1.59629	1.6362	0.769903	Phenylpropanoids and polyketides
sn-Glycerol 3-phosphoethanolamine	0.181805	2.09058	0.271221	1.473	0.484046	0.339771	-0.602882	-0.882901	-0.842614	-1.01066	-0.719559	-0.781808	Lipids and lipid-like molecules
Hydroquinone	-1.33208	-1.33706	-1.20738	-0.2028	-0.524898	-0.235281	1.3331	0.0946308	0.705453	1.39713	0.146973	1.16221	Benzenoids
Pristanic acid	0.654473	1.86016	0.409403	0.554168	0.846046	0.496072	-0.297552	-0.887702	0.11195	-1.50413	-1.18512	-1.05777	Lipids and lipid-like molecules
2-Oxoadipic acid	-1.07709	-1.38521	-1.46413	-0.312539	-0.0472265	-0.528627	1.04477	0.714878	0.0469384	1.1817	1.51689	0.309633	Organic acids and derivatives
Citraconic acid	-1.05597	-1.17431	-1.30654	-0.121788	-0.645077	-0.448839	1.60977	0.569101	-0.411032	0.906537	1.26391	0.814252	Lipids and lipid-like molecules
(1r,3r,4s,5r)-1,3,4-trihydroxy-5-[(e)-3-(4-hydroxy-3-methoxyphenyl)prop-2-enoyl]oxycyclohexane-1-carboxylic acid	-0.992118	-0.95422	-1.10361	-0.462859	-0.717291	-0.503284	-0.139782	1.23897	0.0612663	1.26236	1.89146	0.419113	Organic oxygen compounds
Myristic acid	0.0705866	0.914688	0.159988	0.21779	1.54887	1.80363	-0.645679	-0.702548	-0.424334	-1.52473	-0.631048	-0.787207	Lipids and lipid-like molecules
D-gluconate	-0.744223	-0.737085	-1.30091	-0.9758	-0.651463	-0.281197	1.53614	0.236903	0.596587	-0.35094	1.71685	0.955132	Organic oxygen compounds
Xylitol	-0.865296	-1.11206	-1.30292	-0.801782	-0.0296705	-0.439131	0.61343	0.113696	2.13872	0.966661	0.76204	-0.0436927	Organic oxygen compounds
Lovastatin hydroxy acid	0.204341	0.951224	0.904583	1.00933	0.212721	1.25182	-1.2157	-0.850324	0.831725	-0.866239	-1.22215	-1.21133	Organic acids and derivatives
Flavin mononucleotide (fmn)	-0.710156	-0.804721	-0.656284	-0.674605	-0.864032	-0.812955	0.584659	1.59812	-0.302206	0.573637	2.05877	0.00976581	Nucleosides, nucleotides, and analogues
Cis-aconitate	-0.737454	-1.11288	-1.24053	-0.251538	-0.67172	-0.482698	1.956	0.306019	-0.484866	0.741061	1.35669	0.621917	Organic acids and derivatives
Porphobilinogen	-0.80245	-0.763801	-0.870393	-0.702477	-0.748064	-0.566685	1.81037	0.249116	-0.211633	-0.28387	1.43268	1.45721	Organic nitrogen compounds
Estradiol Cypionate	0.224424	0.691218	0.59441	0.858075	0.582384	1.50043	-1.30493	-0.604048	0.876687	-0.940759	-1.22313	-1.25476	NA
17,20-dimethylprostaglandin f1.alpha.	0.182451	1.20613	-0.240822	2.04573	1.14952	0.0969589	-0.607658	-0.781724	-0.112355	-1.18446	-0.923913	-0.829849	Lipids and lipid-like molecules
(2r,3s,4s,5r,6r)-6-[1,7-bis(4-hydroxyphenyl)heptan-3-yloxy]-5-[(2s,3r,4r)-3,4-dihydroxy-4-(hydroxymethyl)oxolan-2-yl]oxy-2-(hydroxymethyl)oxane-3,4-diol	0.201038	1.41422	-0.00936757	0.856606	1.92797	0.0336087	-0.665685	-0.963931	0.197501	-1.27078	-0.8527	-0.868469	Phenylpropanoids and polyketides
Vitexin-2''-o-rhamnoside	-0.789801	-0.784772	-0.766678	-0.737386	-0.62141	-0.645223	-0.58622	0.649107	2.08899	1.14631	1.16979	-0.122705	Phenylpropanoids and polyketides
L-Glutamine	-0.807474	-0.731112	-0.807044	-0.81475	-0.519447	-0.62541	1.99589	0.0668723	-0.443537	0.0196787	1.11234	1.554	Organic acids and derivatives
7-ethyl-10-(4-n-aminopentanoic acid)-1-piperidino)carbonyloxycamptothecin	0.446283	0.166072	0.247353	0.65366	2.56946	0.166491	-0.682311	-0.721532	-0.043967	-1.10553	-0.791124	-0.904861	NA
D-quinovose	-0.600582	-0.934515	-0.937888	-0.754023	-0.0980799	-0.858813	-0.15665	0.0623708	0.466648	0.205136	2.42742	1.17898	Organic oxygen compounds
1-(9z,12z-octadecadienoyl)-2-hydroxy-sn-glycero-3-phosphoethanolamine	0.407273	1.23406	-0.048059	0.555221	0.92024	1.08585	-0.231009	-1.33126	0.319616	-2.10119	-0.0159537	-0.79478	Lipids and lipid-like molecules
D-arabinonic acid	-0.585774	-0.844302	-0.719046	-0.983439	-0.842276	-0.127376	0.722356	2.4032	0.119002	-0.58271	0.871796	0.56857	Organic oxygen compounds
(S)-2-Hydroxyglutarate	1.30202	1.5327	-0.269329	-0.352087	1.23132	0.595943	-0.0537003	-0.958345	-0.214723	-1.58876	-1.18078	-0.0442674	Organic acids and derivatives
(+)-abscisic acid	-0.839314	-0.138378	-0.988108	-0.480684	-0.716862	-0.874597	0.785236	2.34085	0.0911567	-0.250269	1.2599	-0.188933	Lipids and lipid-like molecules
6,8-dihydroxy-2,2,4,4-tetramethyl-7-(3-methylbutanoyl)-9-(2-methylpropyl)-9h-xanthene-1,3-dione	-0.918368	-0.694376	-0.910622	-0.544123	-0.497961	-0.47127	-0.172047	1.77141	0.587476	2.10354	0.107047	-0.360707	Organoheterocyclic compounds
Cynarin	-0.846651	-0.73648	-0.702842	-0.513162	-0.684417	-0.545643	0.169416	1.01838	-0.379754	2.60242	0.456501	0.162234	Organic oxygen compounds
Mitragynine	-0.877433	-0.672474	-0.818394	-0.511251	-0.476844	-0.631151	-0.172594	1.72794	0.703212	2.12827	0.0258339	-0.425119	NA
1-stearoyl-2-hydroxy-sn-glycero-3-phosphoethanolamine	0.730862	0.774208	-0.168832	-0.179705	1.56506	1.22666	0.159141	-1.04132	-0.0325567	-1.97113	-0.149674	-0.912714	Lipids and lipid-like molecules
7-keto-3.alpha.,12-.alpha.-dihydroxycholanic acid	0.047402	0.727488	0.0738013	0.691889	0.871558	1.49696	-1.20496	-0.480845	1.18823	-1.05855	-1.17254	-1.18044	Lipids and lipid-like molecules
Anthranilic acid (Vitamin L1)	0.231035	-0.774716	-0.279284	1.42634	1.68658	1.56781	-0.834519	-0.792818	-0.365734	-0.988828	-0.67384	-0.20203	Benzenoids
Phloroglucinolcarboxylic acid	-0.893312	-0.46573	-0.593023	-0.536168	-0.701	-0.651162	2.03514	-0.312295	-0.357899	-0.334756	1.43989	1.37032	Benzenoids
Vanillic acid	-0.610528	-0.675183	-0.778419	-0.79922	-0.646156	-0.289812	1.80769	-0.632034	0.460045	-0.67088	1.61609	1.21841	Benzenoids
Ribitol	-0.75765	-0.915095	-0.919472	-0.748791	-0.66183	0.226043	-0.270513	2.03683	0.33671	1.8292	-0.0831188	-0.0723137	Organic oxygen compounds
1-(4-hydroxy-3,5-dimethoxyphenyl)ethanone	-0.839919	-0.695988	-0.781996	-0.548035	-0.291388	-0.617731	1.68778	-0.34675	-0.214267	-0.0455434	2.29206	0.401779	Organic oxygen compounds
(-)-hydroxycitric acid lactone	-0.889143	-0.932025	-0.919305	0.0572772	-0.610268	-0.469004	0.305003	1.51461	0.338203	2.24507	-0.0435347	-0.596883	Organic acids and derivatives
.alpha.-apooxytetracycline	-0.611905	-0.589173	-0.578354	-0.678737	-0.702248	-0.575924	-0.0132415	2.39568	-0.0692179	1.64804	0.181507	-0.406429	NA
Pyruvate	-0.829881	-0.850183	-0.726017	-0.324777	-0.337369	-0.650575	-0.279533	1.27826	1.361	1.89427	0.481713	-1.01691	Organic acids and derivatives
P-coumaric acid	1.543	2.34827	0.428143	0.202187	-0.393568	-0.413349	-0.359413	-0.731832	-0.30712	-0.827401	-0.707526	-0.781394	Phenylpropanoids and polyketides
5-heptenoic acid, 7-[(1r,2r,3s,5s)-2-[(1e,3s)-3-(2,3-dihydro-1h-inden-2-yl)-3-hydroxy-1-propen-1-yl]-3-fluoro-5-hydroxycyclopentyl]-, (5z)-	-0.848495	-0.550403	-0.7776	-0.363221	-0.544773	-0.62151	-0.197025	1.91517	0.384152	2.10666	0.0118851	-0.514836	Lipids and lipid-like molecules
Aminohippuric acid	-0.507064	-0.585411	-0.629749	-0.673662	-0.668533	-0.635385	1.2437	0.446269	-0.113293	-0.540992	0.0872905	2.57683	Benzenoids
Haploside d	-0.897418	-0.655816	-0.823549	-0.37983	-0.57506	-0.359505	-0.420375	2.14343	0.253114	1.90218	-0.168484	-0.0186883	Phenylpropanoids and polyketides
Cinchonine	-0.827115	-0.616371	-0.682455	-0.524353	-0.518634	-0.518922	-0.342923	1.81725	0.704161	2.12119	-0.140736	-0.471093	NA
Alanine-2,3,3,3-d4	-0.132898	-0.65917	-0.246753	1.57159	1.6018	1.55022	-0.785147	-0.923168	-0.233771	-1.00241	-0.720789	-0.0195078	Organic acids and derivatives
D-fructose	-0.410774	-0.588832	-0.888004	-0.711427	-0.507369	-0.571366	0.0848928	1.77538	-0.126645	2.31361	-0.115005	-0.254459	Organic oxygen compounds
1-stearoyl-2-hydroxy-sn-glycero-3-phosphate	-0.169964	0.193705	0.118607	1.37847	0.307276	1.83056	-1.15859	-0.627085	0.97283	-0.590714	-1.1149	-1.14019	Lipids and lipid-like molecules
N-Formylmethionine	-0.57872	-0.720055	-0.776127	-1.11202	0.250681	-0.721781	0.738837	-0.22718	-0.767781	0.481753	1.26116	2.17123	Organic acids and derivatives
Gentisic acid	-0.753249	-0.680354	-0.737361	-0.503658	-0.287044	-0.638594	1.86705	-0.568142	0.0967558	-0.715979	1.66843	1.25215	Benzenoids
Mestranol	-0.74274	-0.57199	-0.701724	-0.480003	-0.535142	-0.529071	-0.399095	1.74617	0.717825	2.19555	-0.20309	-0.496693	Lipids and lipid-like molecules
3-hydroxy-3-methylglutaric acid	-0.216651	-0.87809	-0.741807	-0.684668	-0.0968426	-0.93212	0.0205645	-0.48247	-0.0103963	1.30081	2.51314	0.208538	Lipids and lipid-like molecules
D-glucose 6-phosphate	-0.377005	1.79895	-0.719827	0.7436	0.444233	1.63653	0.230145	-0.777733	-0.600451	-1.2292	-1.06721	-0.0820253	Organic oxygen compounds
Udp-galactose	-0.429579	-1.0651	-1.10998	-0.764699	-0.267877	0.141743	1.89938	-0.633648	-0.0823613	-0.299234	1.66434	0.947015	Nucleosides, nucleotides, and analogues
Hmboa + o-hex	-0.712542	-0.78346	-0.879636	-0.406569	-0.571542	-0.138048	0.408647	-0.186922	0.205215	-0.292482	0.532318	2.82502	Organic oxygen compounds
Trans-ferulic acid	-1.09757	-0.653391	-1.17501	-0.0618521	-0.115654	-0.342787	-0.769873	2.13119	-0.480789	1.28072	0.745833	0.539182	Phenylpropanoids and polyketides
Traumatic Acid	-0.550706	-0.653727	-0.700745	-0.486882	-0.524253	-0.525819	-0.376786	2.57942	0.635517	1.25286	-0.251971	-0.396909	Lipids and lipid-like molecules
2,3-dihydroxybenzoic acid	-0.680511	-0.608697	-0.708762	-0.497816	-0.460413	-0.477411	2.36267	-0.356382	-0.279688	-0.592352	1.46151	0.837848	Benzenoids
Eplerenone hydroxy acid	-0.823253	-0.467042	-0.734079	-0.403472	-0.440042	-0.562945	-0.233355	1.70422	0.904613	2.10519	-0.268134	-0.781701	NA
Progesterone	0.44315	1.60456	0.309174	0.323263	1.46789	-0.722042	-0.853979	-1.1146	0.894287	-1.33431	-0.885262	-0.132133	Lipids and lipid-like molecules
D-ribose	-0.736009	-0.563697	-0.61124	-0.537733	-0.870309	-0.0814547	0.00602781	1.67711	0.375197	2.28447	-0.691839	-0.250519	Organic oxygen compounds
Eriodictyol	-0.586497	-0.604354	-0.595248	-0.585592	-0.488278	-0.531597	-0.407961	1.92976	-0.0395269	2.25908	-0.0856195	-0.264166	Phenylpropanoids and polyketides
D-Mannose	-0.281456	-0.33703	-0.722954	-0.730032	-0.657829	-0.64426	0.137276	2.43412	-0.311545	1.64637	-0.338922	-0.193735	Organic oxygen compounds
Pe(16:1e/15-hete)	-0.903292	-1.19672	0.772098	-0.769483	-1.06942	-0.169165	0.904959	0.477955	-0.284456	-0.631101	0.821815	2.04681	Lipids and lipid-like molecules
Pentadecanoic Acid	-0.0513368	2.12657	0.403184	-0.274384	1.41959	-0.294751	0.365887	-0.768158	-0.572788	-1.15806	-1.31449	0.118744	Lipids and lipid-like molecules
Dibutyl phthalate	0.556566	1.27561	0.424625	0.694067	1.04922	1.44252	-0.863001	-0.549737	-0.998523	-0.800962	-0.962842	-1.26754	Benzenoids
DL-valine	-0.742918	-1.21995	-1.17112	-0.67274	-0.491694	-0.947403	1.56098	0.545917	0.672711	0.184064	1.4336	0.848563	Organic acids and derivatives
Betaine	-0.626594	-1.09369	-0.871902	-0.68184	-0.65665	-1.27491	1.62572	0.711668	0.453257	0.0800101	1.02206	1.31287	Organic acids and derivatives
Pro-leu	-0.965448	-1.01934	-0.843485	-0.793214	-0.748585	-0.715437	1.19334	0.651834	-0.120467	1.04903	0.455928	1.85585	Organic acids and derivatives
Adenosine monophosphate (AMP)	1.1307	0.95591	0.846289	0.116638	1.05496	0.976679	-0.568869	-0.92534	-0.275461	-1.9112	-0.947374	-0.452935	Nucleosides, nucleotides, and analogues
.beta.-estradiol 17-valerate	-1.08746	-1.12866	-1.1947	-0.330401	-0.724058	-0.608591	1.47967	1.34605	0.354706	-0.068332	1.14886	0.81291	Lipids and lipid-like molecules
L-NG-Monomethylarginine	0.409532	1.36145	1.95882	0.317951	0.135006	0.817311	-0.866031	-0.921261	-0.444145	-0.968346	-0.889158	-0.911127	NA
Adenosine 5'-monophosphate	1.14133	1.0225	0.970902	-0.0157309	0.902485	0.941193	-0.474569	-1.0809	-0.336851	-1.94184	-0.781156	-0.347362	Nucleosides, nucleotides, and analogues
Trigonelline	-0.895195	-1.05602	-0.983167	-0.868772	-0.644732	-0.435879	0.86236	1.03428	-0.00738541	0.518061	0.341516	2.13493	Alkaloids and derivatives
L-Palmitoylcarnitine	1.52391	1.44861	0.663591	-0.273846	0.817188	0.699978	-1.12223	-0.98248	0.0399918	-1.08318	-0.804662	-0.926872	Lipids and lipid-like molecules
2-Ethoxyethanol	-0.868575	-1.14697	-0.774909	-1.11996	-0.227216	-0.709858	1.7801	-0.0519026	0.219163	0.567918	0.806898	1.52532	Organic oxygen compounds
(4r)-4-((3s,5s,7s,9s,10s,13r,14s,17r)-3,7-dihydroxy-10,13-dimethyl-12-oxohexadecahydro-1h-cyclopenta[a]phenanthren-17-yl)pentanoic acid	-0.235268	1.28121	0.850778	1.19276	0.51735	1.18431	-1.1018	-0.800726	0.354222	-1.06314	-1.08819	-1.09151	Lipids and lipid-like molecules
D-erythro-imidazolylglycerol phosphate	0.199572	1.71068	1.5693	0.469778	0.410791	0.371953	-1.34001	-0.993715	-0.919849	-1.14161	-0.332813	-0.00407777	Organic acids and derivatives
Glu-Arg	0.652381	0.889652	0.0102877	1.57352	0.388444	1.09967	-1.28186	-0.321207	0.366473	-0.712542	-1.27017	-1.39464	Organic acids and derivatives
Ethyl gallate	-0.949258	-0.780329	-0.960494	-0.924457	-0.404319	-0.569227	1.90444	0.234011	-0.351071	0.247613	1.05296	1.50014	Benzenoids
Ile-Ala-Arg	0.616842	1.02431	0.164922	1.53229	0.444916	0.803091	-1.33487	0.285988	0.0971036	-0.990115	-1.28903	-1.35545	NA
3,4-methylenedioxybenzyl methyl ketoximine	-0.957751	-0.641745	-0.786597	-0.793023	-0.51938	-0.798666	1.53027	-0.050895	-0.428462	0.426838	1.15819	1.86122	NA
1,2-dioleoyl-sn-glycero-3-phosphatidylcholine	-0.991882	-1.1753	-0.106062	-0.817621	-0.796404	-0.556481	1.36122	1.24849	-0.0744903	-0.608383	1.09049	1.42642	Lipids and lipid-like molecules
1,2-dilinoleoyl-sn-glycero-3-phosphoethanolamine	-1.09283	-0.990363	0.00463075	-0.939825	-0.884049	-0.507142	1.36602	0.58199	-0.162746	-0.145362	0.74649	2.02318	Lipids and lipid-like molecules
3-aminohexanoic acid	-0.993124	-1.01426	-1.01203	-0.538935	-0.587534	-0.25802	0.0255328	2.01555	0.357438	1.57607	-0.281099	0.710411	Organic acids and derivatives
Goitrin	-0.0729019	0.80462	1.09671	1.2024	0.55126	0.821179	-1.23688	-0.797105	0.879759	-0.671932	-1.22137	-1.35574	Organoheterocyclic compounds
DL-arginine	-0.0446067	1.23201	0.916976	0.651352	0.0879764	1.53676	-0.0615878	-1.40964	-0.165054	-1.66978	-1.01793	-0.0564716	Organic acids and derivatives
Ile-Pro-Ile	-0.0868568	0.432308	-0.096034	2.34904	0.513538	1.25368	-0.895702	-0.559883	-0.363231	-0.700807	-0.931011	-0.915045	Organic acids and derivatives
Stearoylcarnitine	1.60215	1.08338	1.89212	-0.489405	0.34547	-0.0693551	-0.923285	-0.591769	-0.57295	-0.947198	-0.619068	-0.710096	Lipids and lipid-like molecules
.gamma.-l-glu-.epsilon.-l-lys	0.495781	0.444678	-0.341338	2.07404	0.692586	0.984274	-1.10794	-0.420783	0.236045	-0.744562	-1.17463	-1.13816	Organic acids and derivatives
Val-Ile-Arg	-0.0487081	0.706725	0.979531	1.34462	0.265105	1.07148	-1.28806	-0.721176	0.842543	-0.595581	-1.29757	-1.2589	Organic acids and derivatives
Ile-Thr-Arg	0.0234051	1.1612	0.358434	1.17687	-0.00343256	1.55621	-1.33006	-0.444968	0.491635	-0.41725	-1.17384	-1.39821	Organic acids and derivatives
4-[5-[[4-[5-[acetyl(hydroxy)amino]pentylamino]-4-oxobutanoyl]-hydroxyamino]pentylamino]-4-oxobutanoic acid	0.756645	1.08886	-0.0457562	0.625189	1.22914	0.601782	-0.828346	-1.22343	0.409722	-2.03817	0.102922	-0.678562	Lipids and lipid-like molecules
2-Phenylacetamide	-0.196381	1.20144	0.716525	0.0338465	1.0134	1.48495	-1.14773	0.604806	-0.236175	-1.09565	-1.15655	-1.22248	NA
1-Palmitoyl-sn-glycero-3-phosphocholine	0.860715	1.16152	-0.509219	0.384707	1.62455	0.709889	-0.266448	-1.11333	0.247799	-1.75635	-0.674778	-0.669063	NA
.beta.-Cyano-L-alanine	0.180037	1.02074	1.92328	0.0186213	0.766561	0.319766	-1.1848	0.0749444	0.345491	-1.09116	-1.17332	-1.20017	NA
Curcumin	-0.926852	-1.06222	-1.02859	-0.448462	-0.638546	-0.115695	0.28094	0.626603	-0.438935	1.10952	2.30764	0.334592	Phenylpropanoids and polyketides
L-hydroxyarginine	-0.950557	-0.948007	-1.38872	-1.09504	0.290756	-0.128561	1.183	0.636753	0.933873	-0.717294	0.648644	1.53515	Organic acids and derivatives
Stearoyl-l-carnitine	0.775018	1.86206	1.82813	-0.371752	-0.143028	0.25415	-1.15952	-0.437753	-0.378689	-0.881912	-0.636775	-0.709926	Lipids and lipid-like molecules
(3as,5r,5as,8as,9ar)-5,8a-dimethyl-1-methylidene-3a,4,5,5a,6,7,9,9a-octahydroazuleno[6,7-b]furan-2,8-dione	-0.787634	-0.810777	-0.86521	-0.65423	-0.603334	-0.453696	-0.219883	1.26353	1.30752	2.1216	0.0457354	-0.34362	Lipids and lipid-like molecules
Pro-val	0.230203	0.0430798	-0.151838	2.13303	0.45108	1.45105	-1.04337	-0.432542	0.176554	-0.801449	-1.00707	-1.04873	Organic acids and derivatives
Dibucaine	-0.835312	0.11822	-0.575549	-1.01004	-0.763678	-1.06324	-0.476067	2.24527	0.638334	0.143415	1.16428	0.414365	Organoheterocyclic compounds
Tetradecanamide, n-[(1r,2r)-2-hydroxy-1-(hydroxymethyl)-2-(4-nitrophenyl)ethyl]-	-0.182927	0.649575	1.29043	1.46834	-0.00764101	0.888574	-1.22141	-0.769839	0.798732	-0.467259	-1.23104	-1.21552	Benzenoids
Pro-Ala	0.35176	-0.0440284	-0.00768264	1.77603	0.606569	1.41447	-1.27747	0.0282343	0.307318	-0.60728	-1.20518	-1.34273	Organic acids and derivatives
1-hexadecyl-2-(8z,11z,14z-eicosatrienoyl)-sn-glycero-3-phosphocholine	-0.724782	-1.04895	-0.0633858	-0.715512	-1.09102	-0.435575	0.889649	0.0474165	0.614232	-0.675995	1.00286	2.20106	Lipids and lipid-like molecules
Kaempferol 3-o-rutinoside	-0.815365	-0.805378	-0.854098	-0.455943	-0.506443	-0.592429	0.203795	0.929412	-0.428571	2.56123	0.698991	0.0647931	Phenylpropanoids and polyketides
Leukotriene f4	-0.787043	-0.646844	-0.725798	-0.753331	-0.6043	-0.471927	0.468445	1.68652	0.442586	2.15694	-0.188862	-0.576388	Lipids and lipid-like molecules
Arachidonoylthiophosphorylcholine	-0.834338	-1.04892	0.108835	-0.850857	-0.79255	-0.561142	1.47659	0.128946	-0.427939	-0.299598	1.19907	1.9019	Organic nitrogen compounds
Heptadecasphinganine	-0.544244	0.81747	0.44467	1.00298	1.54697	0.701223	-1.197	-0.370494	0.132841	-0.266836	-0.207193	-2.06038	Organic nitrogen compounds
Leu-Pro	0.0426021	0.266692	-0.360545	2.04823	0.5865	1.36744	-1.2269	-0.282866	0.215834	-0.370523	-1.19215	-1.09432	Organic acids and derivatives
Pheniramine	-0.657028	-0.661427	1.07462	-1.57517	-1.00163	-1.12312	0.999778	-0.0359336	0.399431	0.179399	0.92214	1.47894	Organoheterocyclic compounds
Pyrrolidine	-0.687103	-1.22795	-1.27695	-0.27116	-0.291828	-0.169841	0.493401	1.37692	0.519712	1.95426	0.455592	-0.875056	Organoheterocyclic compounds
N-arachidonylmaleimide	1.03087	2.16522	0.369312	0.110745	0.44722	-0.221434	-0.0517694	-1.32993	-0.765361	-1.56332	-0.222227	0.0306772	Organoheterocyclic compounds
Leukotriene d4 methyl ester	-0.76752	-0.794757	-0.799335	-0.235669	-0.666368	-0.544815	2.57574	0.5524	-0.0182839	0.267672	-0.571781	1.00272	Organic acids and derivatives
Methanone, (3-methoxyphenyl)(1-pentyl-1h-indol-3-yl)-	-0.630325	-1.04321	-0.661626	-0.81198	-0.524404	-0.0621258	2.00018	-0.473526	0.131129	-0.546764	1.03004	1.59261	Organoheterocyclic compounds
Pheophorbide a	-0.670014	-0.648535	-0.658828	-0.647857	-0.605636	-0.46533	-0.078597	0.989072	1.61545	2.14279	-0.354297	-0.618218	Organoheterocyclic compounds
Lpc 16:0	0.480844	0.451273	-0.725985	0.217515	1.64749	1.58791	-0.0136232	-1.20824	-0.216354	-1.56854	0.210119	-0.86241	Lipids and lipid-like molecules
Hypoxanthine	-0.509984	-0.585498	-0.784238	-0.64798	-0.569393	-0.549935	1.95367	-0.702394	0.698372	-0.592806	0.450916	1.83927	Organoheterocyclic compounds
1-myristoyl-sn-glycero-3-phosphocholine	0.319179	1.10374	-0.509913	-0.0313975	1.50646	1.25535	0.0842702	-1.30979	-0.422806	-1.7147	0.448286	-0.728673	Lipids and lipid-like molecules
DL-Lysine	-0.91816	-1.73831	-1.85308	0.153961	-0.012124	0.737444	0.179326	1.22904	0.336257	0.244757	1.00989	0.630984	Organic acids and derivatives
1-Stearoyl-sn-glycerol 3-phosphocholine	0.553377	1.10388	-0.305214	0.177124	1.73287	0.331486	0.280011	-1.13219	0.35448	-2.04615	-0.44003	-0.609644	NA
2-piperidone	-0.487228	0.366229	-0.0047298	1.05226	1.09431	1.56156	0.022036	-1.78065	-0.0692151	-1.58853	-0.376309	0.210275	Organoheterocyclic compounds
Maltose	-0.619609	-0.613121	-0.643651	-0.54813	-0.588596	-0.541525	-0.157207	2.49365	0.923352	1.18087	-0.402956	-0.48307	Lipids and lipid-like molecules
1,2-dilinolenoyl-sn-glycero-3-phosphoethanolamine	-1.0724	-0.958973	0.795529	-0.830213	-0.901952	-0.510014	0.70832	1.08129	0.196199	-0.965891	0.569095	1.88901	Lipids and lipid-like molecules
Manumycin a	-1.13636	-1.46987	-0.952217	0.880429	-0.337488	-0.428251	0.844788	1.54305	1.14837	-0.845123	0.0951951	0.657481	Organic oxygen compounds
4-Aminobutyric acid(GABA)	-0.701318	-0.718285	-0.700988	-0.624193	-0.359405	-0.338454	-0.123695	1.61527	0.369758	2.38829	-0.207439	-0.599534	Organic acids and derivatives
Diprotin b	-0.361603	0.296827	-0.412821	2.38337	0.338244	1.19583	-0.974746	-0.195539	0.304718	-0.605981	-0.971287	-0.99701	Organic acids and derivatives
Lpc 18:3	0.862907	0.748901	-0.250996	0.261465	1.16831	0.633003	-0.0557706	-1.09774	1.03261	-2.17138	-0.855714	-0.275603	Lipids and lipid-like molecules
Val-Arg	0.188852	0.88778	-0.256903	1.72197	0.0970377	0.744408	-1.30176	-0.58028	1.1726	-0.166053	-1.21276	-1.2949	NA
